# Supplementary material
Source: MDPI journal article supplement (https://www.mdpi.com/2073-4395/14/3/498)
Supplement: s1 [file s1]

A

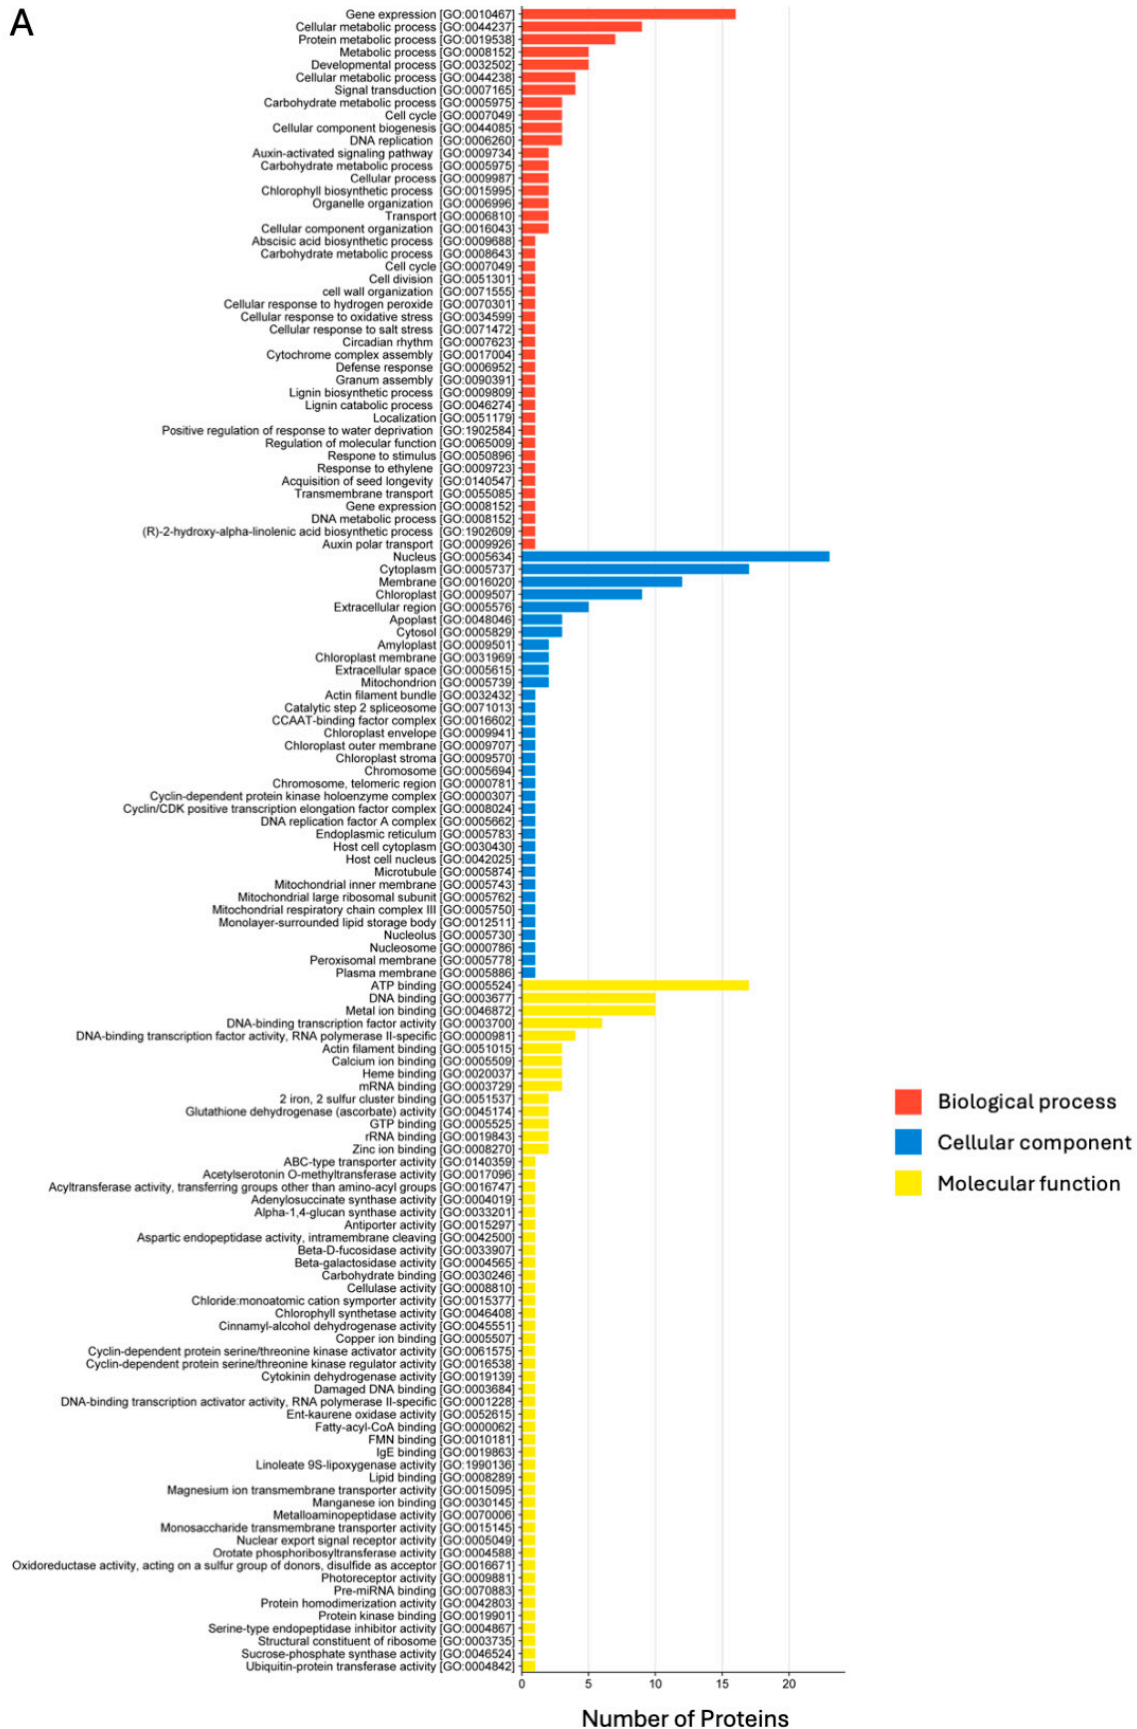

B

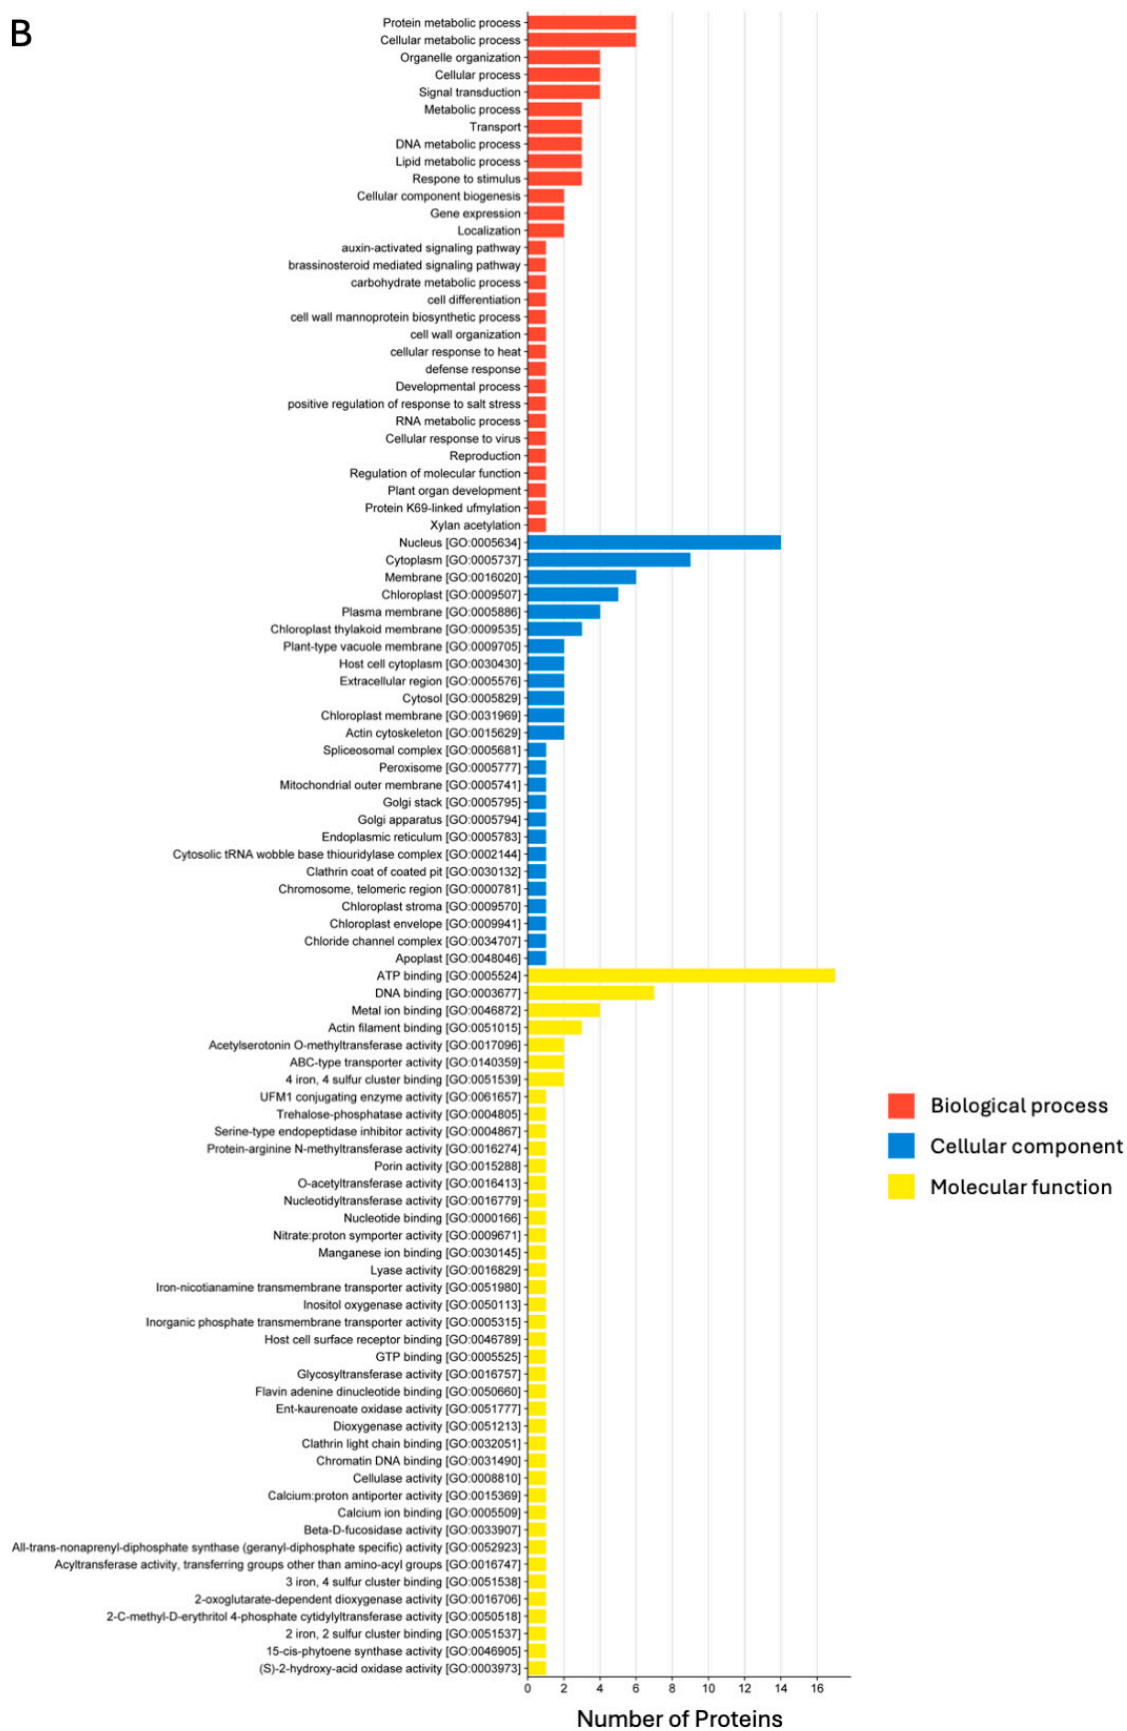

C

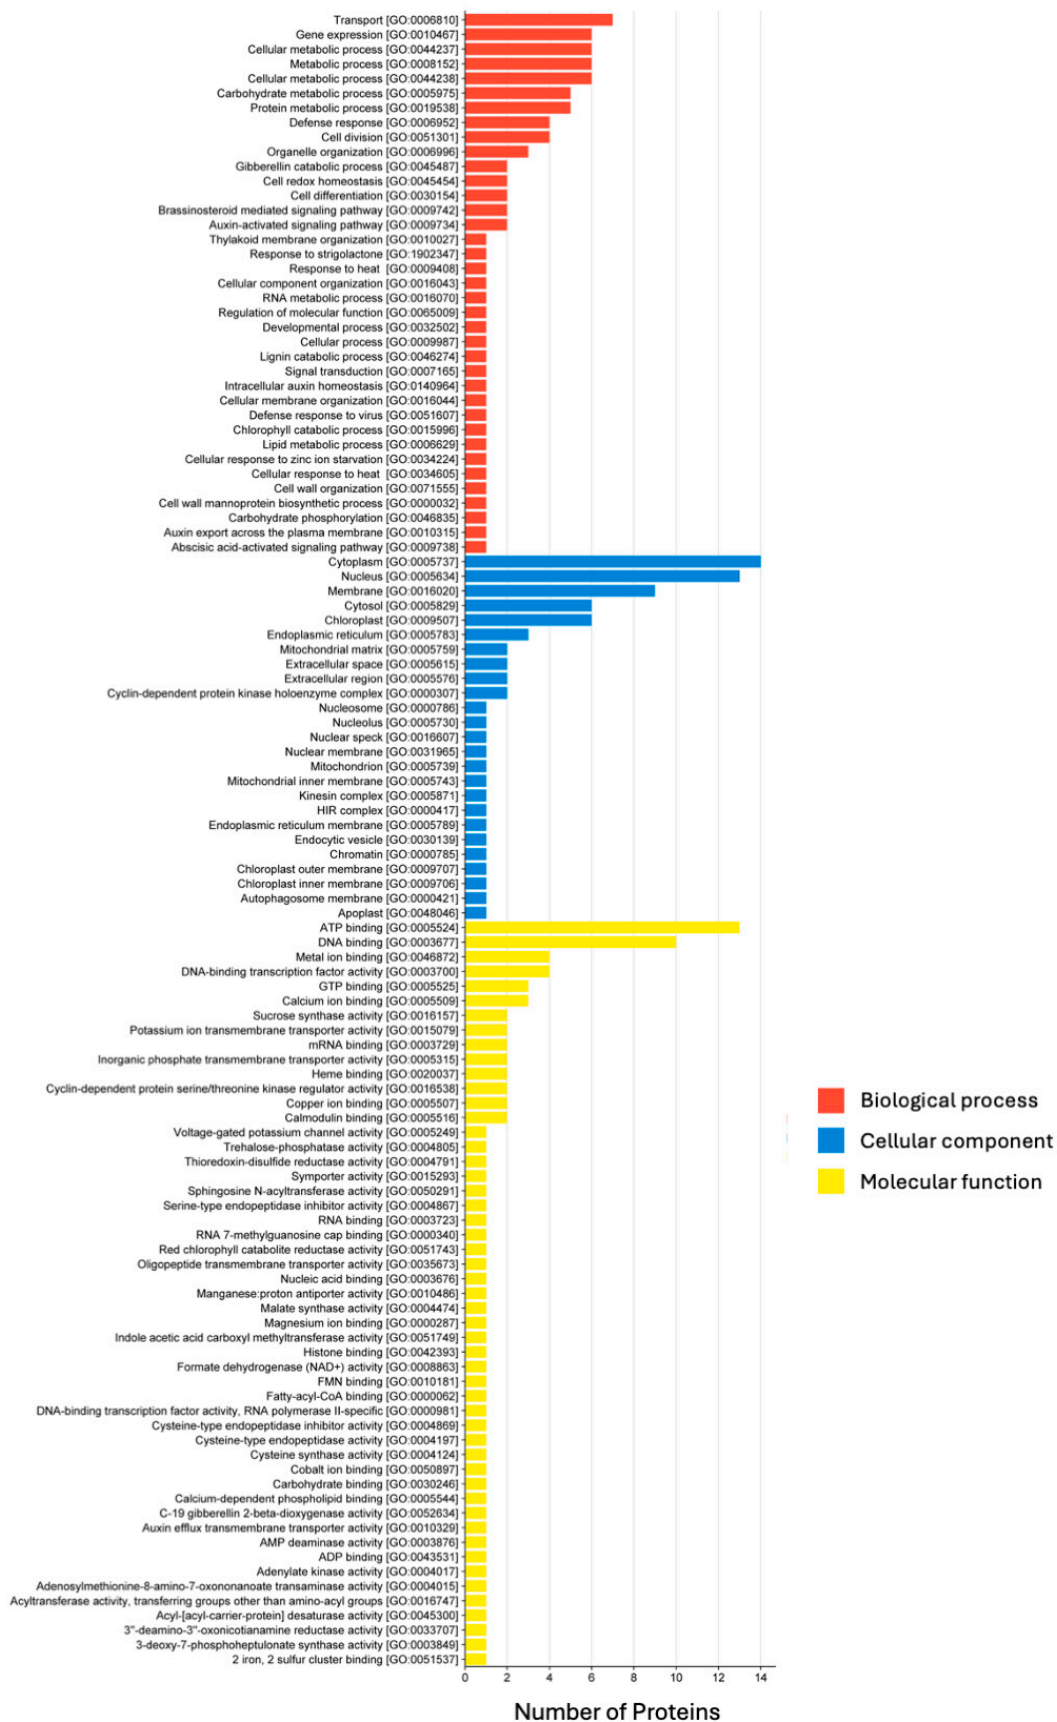

D

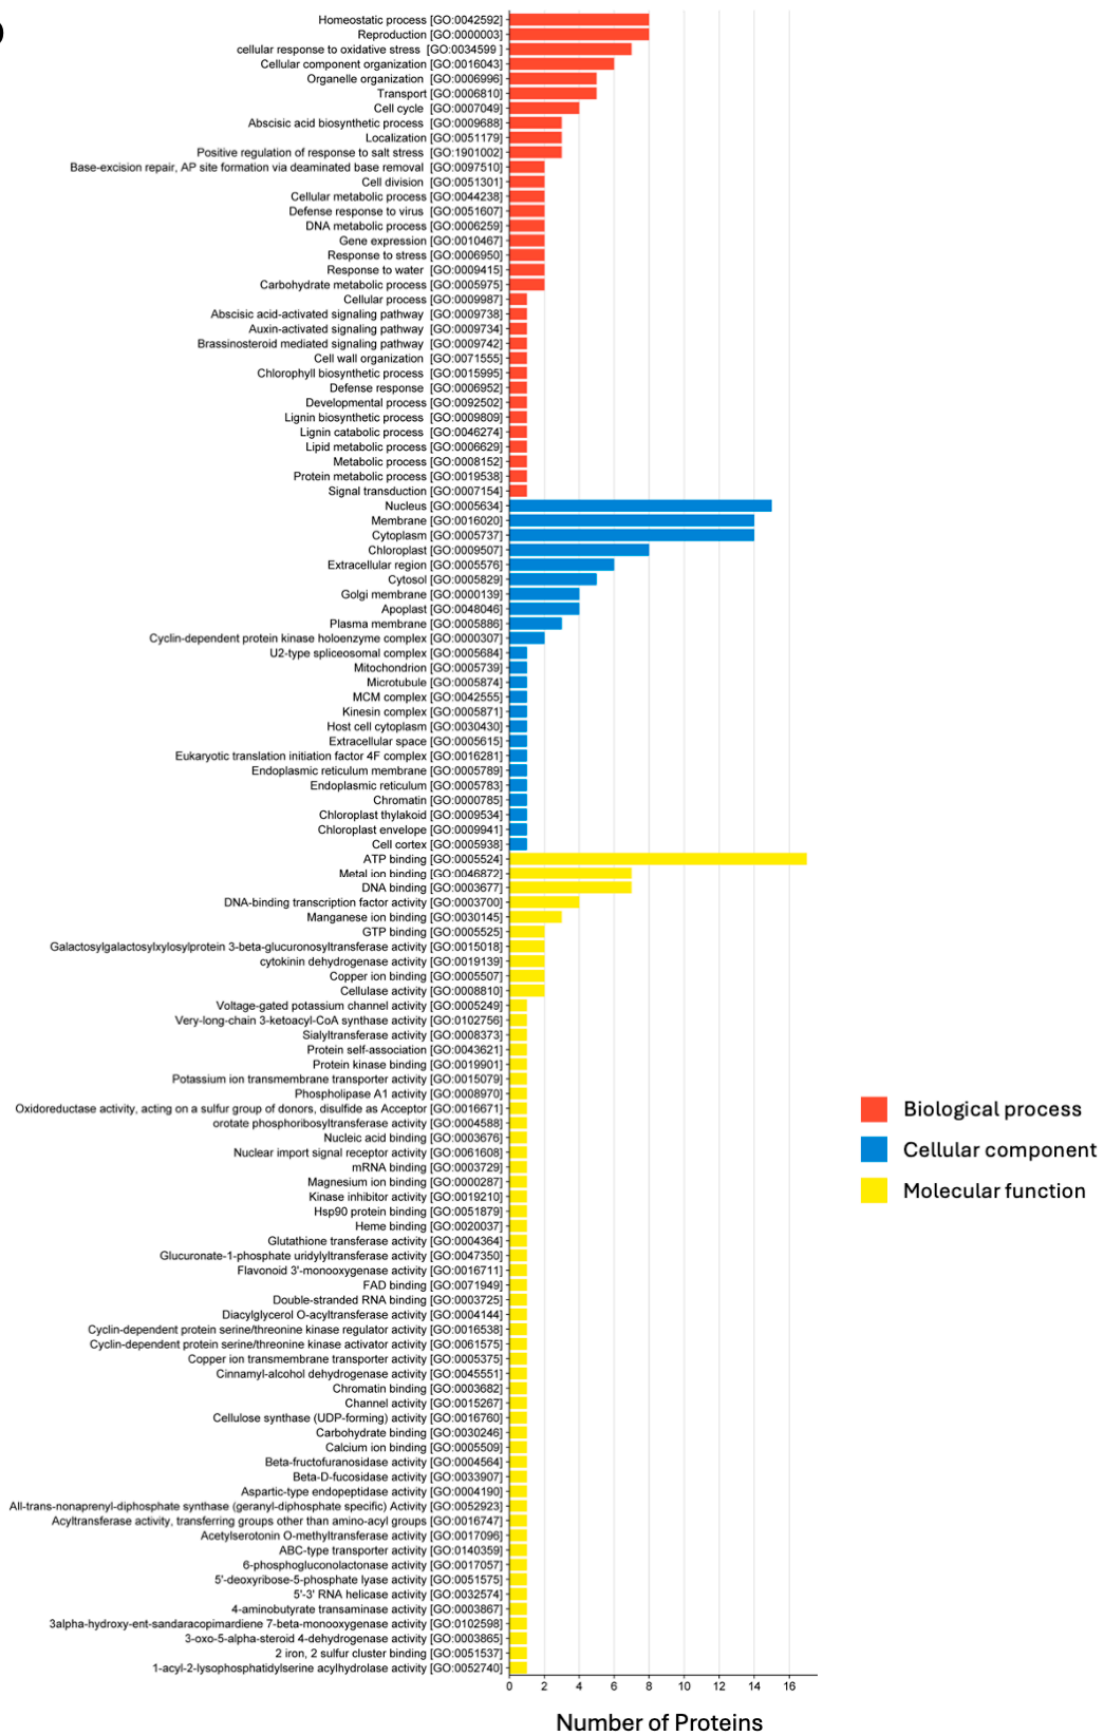

**Figure S1.** Bar graph of the gene ontology (GO) classification of all identified proteins comparing inoculated and non-inoculated conditions. The bar graph illustrates the up- and down-regulation of proteins under the inoculated condition in leaf samples (A and B) and root samples (C and D), categorized according to biological processes (red), cellular components (blue), and molecular function (yellow).
