# Supplementary material
Source: MDPI journal article supplement (https://www.mdpi.com/2073-4395/14/3/498)
Supplement: s1 [file s1]

Archive with 3 entries (3 files):
- Figure S1-rev1.pdf
- Table S1 Proteomic analysis in the leaf sample.xlsx
- Table S2 Proteomic analysis in the root sample.xlsx
