# Supplementary material
Source: MDPI journal article supplement (https://www.mdpi.com/2073-4395/14/3/498)
Supplement: s1 [file s1 › Table S1 Proteomic analysis in the leaf sample.xlsx]

## Sheet: Sheet1
Protein IDs	Control_1	Control_2	Control_3	R3G3_1	R3G3_2	R3G3_3	Found in controls	Found in R3G3	Found in total		normalized_1	control 1	control 2	control 3	R3G3_1	R3G3_2	R3G3_3		Average norm		Slopes			normalized_2	control 1	control 2	control 3	R3G3_1	R3G3_2	R3G3_3		impute missing values	control 1	control 2	control 3	R3G3_1	R3G3_2	R3G3_3		F-test		log2(fold-change)	-log2(p-value)	p-value
Q5QNI5	16.408	16.9267	16.5184	10.2745	16.095	16.2204	3	3	6			7.72387	7.86183	7.60544	0.933057	6.19476	7.53334		6.30872		control 1	0.478478			16.1426	16.4091	15.8309	1.95785	12.5008	15.2005			16.1426	16.4091	15.8309	1.95785	12.5008	15.2005		0.00341504		-6.24114	1.93079	0.262286
Q0D5P8	13.137	12.5805	16.1954	18.0195	18.5052	15.7492	3	3	6			4.4529	3.51558	7.28249	8.67806	8.60495	7.06209		6.59935		control 2	0.479114			9.30639	7.33768	15.1587	18.2093	17.3645	14.2496			9.30639	7.33768	15.1587	18.2093	17.3645	14.2496		0.416236		6.00692	3.55355	0.0851676
Q6YXW6	9.68201	10.1713	7.80342	9.49761	11.8168	15.4639	3	3	6			0.997888	1.10641	-1.1095	0.156175	1.91656	6.77685		1.64073		control 3	0.480418			2.08555	2.3093	-2.30945	0.327705	3.86755	13.6741			2.08555	2.3093	-2.30945	0.327705	3.86755	13.6741		0.248526		5.26131	1.81125	0.284945
Q0J8M2	9.40323	14.0862	14.756	13.3263	14.8452	14.6713	3	3	6			0.719102	5.02133	5.84306	3.98485	4.94493	5.98417		4.41624		R3G3_1	0.476572			1.5029	10.4805	12.1625	8.36149	9.97871	12.0746			1.5029	10.4805	12.1625	8.36149	9.97871	12.0746		0.19092		2.08968	0.784796	0.580434
Q7X9V2	11.3309	10.7361	11.3314	11.6643	10.9443	14.4413	3	3	6			2.64674	1.67126	2.41844	2.32288	1.04401	5.75423		2.64293		R3G3_2	0.495548			5.53158	3.48824	5.03404	4.87414	2.10677	11.6107			5.53158	3.48824	5.03404	4.87414	2.10677	11.6107		0.0907247		1.51257	0.67074	0.628184
Q6ENG6	14.0997	14.2873	15.3636	14.3701	16.2846	14.4337	3	3	6			5.41555	5.22239	6.45066	5.02864	6.38438	5.74662		5.70804		R3G3_3	0.495599			11.3183	10.9001	13.4272	10.5517	12.8835	11.5953			11.3183	10.9001	13.4272	10.5517	12.8835	11.5953		0.852938		-0.205045	0.230588	0.852288
Q6L500	13.7366	14.0192	13.9192	16.2911	15.907	14.4204	3	3	6			5.05249	4.95427	5.00631	6.94964	6.00677	5.73326		5.61712						10.5595	10.3405	10.4207	14.5826	12.1215	11.5684			10.5595	10.3405	10.4207	14.5826	12.1215	11.5684		0.00949181		2.31721	2.95639	0.128836
Q0INY7	14.5084	13.7321	14.8727	14.8155	16.0377	14.3763	3	3	6			5.82429	4.66717	5.9598	5.4741	6.13745	5.68917		5.62533						12.1725	9.74127	12.4054	11.4864	12.3852	11.4794			12.1725	9.74127	12.4054	11.4864	12.3852	11.4794		0.221668		0.343903	0.468318	0.722807
Q7XPY7	10.809	9.44435	14.6855	14.4371	11.2233	14.2918	3	3	6			2.12484	0.379465	5.77259	5.09566	1.32301	5.60472		3.38338						4.44084	0.792015	12.0158	10.6923	2.6698	11.309			4.44084	0.792015	12.0158	10.6923	2.6698	11.309		0.829519		2.47417	0.742869	0.59755
Q9SAY3	13.1143	13.4445	13.5121	13.7647	12.3848	14.23	3	3	6			4.43014	4.37961	4.5992	4.42323	2.48457	5.54293		4.30995						9.25882	9.14107	9.57333	9.28134	5.01379	11.1843			9.25882	9.14107	9.57333	9.28134	5.01379	11.1843		0.00995319		-0.831262	0.52775	0.693635
A2WKS5	13.2818	14.2522	13.2003	15.7391	15.5993	14.2123	3	3	6			4.59768	5.18733	4.28739	6.39771	5.69901	5.52525		5.2824						9.60897	10.8269	8.9243	13.4244	11.5004	11.1486			9.60897	10.8269	8.9243	13.4244	11.5004	11.1486		0.764523		2.23776	3.88412	0.0677273
Q9FT74	11.2109	11.2954	10.7259	10.4983	11.4077	14.1492	3	3	6			2.52673	2.23054	1.81295	1.15681	1.50748	5.4621		2.44944						5.28077	4.65555	3.7737	2.42736	3.04205	11.0212			5.28077	4.65555	3.7737	2.42736	3.04205	11.0212		0.0486746		0.926868	0.375329	0.77093
Q40677	13.7352	13.5337	14.464	14.2536	15.4914	13.9072	3	3	6			5.05112	4.46881	5.55105	4.91211	5.59112	5.22008		5.13238						10.5566	9.32724	11.5546	10.3072	11.2827	10.5329			10.5566	9.32724	11.5546	10.3072	11.2827	10.5329		0.346443		0.228085	0.389104	0.763603
Q7XSV4	14.0411	11.091	13.9777	12.8868	12.8836	13.8881	3	3	6			5.35702	2.02615	5.0648	3.5454	2.98335	5.20098		4.02962						11.196	4.22896	10.5425	7.43939	6.02031	10.4943			11.196	4.22896	10.5425	7.43939	6.02031	10.4943		0.521898		-0.671128	0.307752	0.807899
Q10MJ1	14.2593	9.8336	13.9865	9.79627	10.6643	13.8373	3	3	6			5.57518	0.768715	5.07354	0.45483	0.764004	5.15024		2.96442						11.6519	1.60445	10.5607	0.954378	1.54174	10.392			11.6519	1.60445	10.5607	0.954378	1.54174	10.392		0.958249		-3.64299	1.13542	0.455203
Q10HL3	11.0873	12.8656	13.1754	12.9769	14.3453	13.772	3	3	6			2.40314	3.80069	4.26249	3.63547	4.445	5.08491		3.93862						5.02247	7.93276	8.87245	7.62837	8.96987	10.2601			5.02247	7.93276	8.87245	7.62837	8.96987	10.2601		0.60121		1.6769	1.77172	0.29286
O64852	13.5964	13.4612	13.5221	13.3329	13.6012	13.6898	3	3	6			4.9123	4.39634	4.60917	3.99144	3.70093	5.00269		4.43548						10.2665	9.17598	9.59408	8.37531	7.46835	10.0942			10.2665	9.17598	9.59408	8.37531	7.46835	10.0942		0.290862		-1.0329	1.82247	0.282736
P84634	10.4514	10.6519	14.0476	13.3465	13.1519	13.6537	3	3	6			1.76729	1.58706	5.13471	4.00508	3.25164	4.96665		3.45207						3.69358	3.3125	10.688	8.40393	6.5617	10.0215			3.69358	3.3125	10.688	8.40393	6.5617	10.0215		0.296109		2.43102	1.31363	0.402306
B9FTR1	9.65598	8.9359	10.7388	15.0355	15.0595	13.6091	3	3	6			0.971855	-0.128985	1.82584	5.69405	5.15925	4.92197		3.074						2.03114	-0.269217	3.80053	11.9479	10.4112	9.93136			2.03114	-0.269217	3.80053	11.9479	10.4112	9.93136		0.420834		8.90935	8.61294	0.00255415
Q5W6R4	8.42105	6.54567	10.9947	8.84527	9.78558	13.5968	3	3	6			-0.263068	-2.51921	2.08178	-0.496167	-0.114682	4.90968		0.599722						-0.549803	-5.25807	4.33328	-1.04112	-0.231424	9.90656			-0.549803	-5.25807	4.33328	-1.04112	-0.231424	9.90656		0.763959		3.36954	1.01793	0.493825
F4K128	14.1961	12.0073	13.4616	13.5992	13.7277	13.5505	3	3	6			5.51194	2.94239	4.54868	4.25778	3.82744	4.86341		4.32527						11.5197	6.14131	9.46818	8.93418	7.72366	9.81321			11.5197	6.14131	9.46818	8.93418	7.72366	9.81321		0.259967		-0.219398	0.148151	0.902406
Q6ENH7	14.2858	14.0307	14.0142	14.121	15.5344	13.5313	3	3	6			5.60164	4.96578	5.10127	4.77953	5.63413	4.84417		5.15442						11.7072	10.3645	10.6184	10.029	11.3695	9.77437			11.7072	10.3645	10.6184	10.029	11.3695	9.77437		0.818557		-0.505763	1.07101	0.475985
Q6ENG7	12.9593	12.6784	14.149	15.0322	16.2466	13.493	3	3	6			4.27521	3.61349	5.23611	5.69074	6.34636	4.80589		4.99463						8.93502	7.54204	10.8991	11.941	12.8068	9.69714			8.93502	7.54204	10.8991	11.941	12.8068	9.69714		0.95039		2.35625	2.69449	0.154482
P93431	12.3371	12.4052	14.0878	14.0802	15.4514	13.437	3	3	6			3.653	3.34028	5.17487	4.73871	5.55114	4.74988		4.53465						7.63462	6.97179	10.7716	9.94334	11.202	9.58412			7.63462	6.97179	10.7716	9.94334	11.202	9.58412		0.298174		1.78382	2.1019	0.232951
Q5QM84	10.2762	10.8757	10.3697	9.53156	10.4828	13.3828	3	3	6			1.59212	1.81086	1.45678	0.19012	0.582543	4.69567		1.72135						3.32746	3.77961	3.03232	0.398932	1.17555	9.47474			3.32746	3.77961	3.03232	0.398932	1.17555	9.47474		0.0111327		0.303274	0.110171	0.926478
Q6E7D7	11.441	5.27262	12.7661	13.7539	14.0295	13.3819	3	3	6			2.7569	-3.79227	3.85315	4.41251	4.12928	4.69485		2.67574						5.76182	-7.91517	8.02041	9.25886	8.33275	9.4731			5.76182	-7.91517	8.02041	9.25886	8.33275	9.4731		0.00983231		7.06588	1.77916	0.291353
Q86287	6.20275	10.4075	8.2572	10.9265	10.889	13.3643	3	3	6			-2.48137	1.34259	-0.655724	1.58508	0.988783	4.67718		0.909423						-5.18597	2.80224	-1.3649	3.32601	1.99533	9.43743			-5.18597	2.80224	-1.3649	3.32601	1.99533	9.43743		0.993314		6.16913	2.93646	0.130629
Q7PC80	9.10337	9.22949	7.68271	10.9922	11.0602	13.3191	3	3	6			0.419243	0.164605	-1.23021	1.65079	1.15989	4.63201		1.13272						0.876202	0.343561	-2.56071	3.46389	2.34062	9.3463			0.876202	0.343561	-2.56071	3.46389	2.34062	9.3463		0.389303		5.49725	3.54561	0.0856378
P0CE10	11.9744	11.4946	9.05327	11.5897	9.98812	13.3006	3	3	6			3.29026	2.42972	0.140351	2.24826	0.0878516	4.61354		2.135						6.87651	5.07128	0.292143	4.71757	0.177282	9.30904			6.87651	5.07128	0.292143	4.71757	0.177282	9.30904		0.71403		0.654652	0.231294	0.851871
A2XW69	12.9625	10.6142	13.4885	14.0667	13.9485	13.2906	3	3	6			4.27841	1.54927	4.57554	4.72524	4.04828	4.6035		3.96338						8.94172	3.23362	9.52409	9.91506	8.16931	9.28877			8.94172	3.23362	9.52409	9.91506	8.16931	9.28877		0.121607		1.89124	1.27666	0.412751
Q6Z6D6	8.51932	8.23496	13.0039	9.10834	10.2626	13.2472	3	3	6			-0.164802	-0.829926	4.09098	-0.233096	0.3623	4.56012		1.2976						-0.344429	-1.73221	8.51546	-0.489109	0.731109	9.20124			-0.344429	-1.73221	8.51546	-0.489109	0.731109	9.20124		0.948086		1.00147	0.265215	0.832075
A0A0P0X9Z7	11.2425	11.6282	11.5531	13.2512	12.1278	13.1406	3	3	6			2.55834	2.56333	2.64018	3.90975	2.22754	4.45348		3.05877						5.34683	5.35015	5.49559	8.2039	4.4951	8.98606			5.34683	5.35015	5.49559	8.2039	4.4951	8.98606		0.00250392		1.83083	1.65686	0.31713
Q9ZP20	11.2274	11.7492	13.7638	14.3724	15.2396	13.1164	3	3	6			2.54325	2.68435	4.85091	5.03095	5.3393	4.42935		4.14635						5.3153	5.60275	10.0973	10.5565	10.7745	8.93737			5.3153	5.60275	10.0973	10.5565	10.7745	8.93737		0.245731		3.08437	2.8836	0.135503
Q5N941	12.9213	10.0783	13.2735	13.6735	13.4592	13.1011	3	3	6			4.23722	1.0134	4.36057	4.33209	3.55891	4.41396		3.65269						8.85562	2.11515	9.07661	9.09011	7.18177	8.90633			8.85562	2.11515	9.07661	9.09011	7.18177	8.90633		0.132208		1.71028	0.973017	0.50944
B9FUF9	12.6644	12.6497	14.0209	11.7909	14.6789	13.0751	3	3	6			3.98024	3.58482	5.10797	2.44948	4.77867	4.38803		4.0482						8.31854	7.48219	10.6323	5.13979	9.64319	8.85401			8.31854	7.48219	10.6323	5.13979	9.64319	8.85401		0.630549		-0.932027	0.717454	0.60817
Q6UTZ2	13.1636	9.82024	13.1044	13.7229	13.6163	13.0719	3	3	6			4.47946	0.755356	4.19146	4.38148	3.71605	4.38485		3.65144						9.36191	1.57657	8.72462	9.19374	7.49888	8.84759			9.36191	1.57657	8.72462	9.19374	7.49888	8.84759		0.0823001		1.95904	1.04403	0.484971
Q2QXP0	12.7107	13.0818	13.2145	13.4069	12.3808	13.0658	3	3	6			4.02662	4.0169	4.30155	4.06543	2.48049	4.37868		3.87828						8.41548	8.38402	8.95376	8.53058	5.00556	8.83513			8.41548	8.38402	8.95376	8.53058	5.00556	8.83513		0.0442705		-1.12733	1.13131	0.456502
A3BF39	13.242	12.9102	12.8837	13.4905	13.3934	13.0473	3	3	6			4.5579	3.84531	3.97077	4.14904	3.49313	4.36025		4.06273						9.52585	8.02588	8.26524	8.70601	7.04901	8.79795			9.52585	8.02588	8.26524	8.70601	7.04901	8.79795		0.802607		-0.421331	0.744439	0.5969
Q6L597	10.8641	11.6278	13.1004	11.8716	10.7188	13.0274	3	3	6			2.17999	2.56292	4.18744	2.53012	0.818525	4.34029		2.76988						4.55609	5.3493	8.71625	5.309	1.65176	8.75768			4.55609	5.3493	8.71625	5.309	1.65176	8.75768		0.557384		-0.967731	0.495772	0.709182
Q8GU92	11.1123	10.9584	11.4013	10.3442	13.6481	12.9879	3	3	6			2.42819	1.89352	2.48833	1.00275	3.74787	4.30076		2.64357						5.07482	3.95213	5.17951	2.10409	7.56308	8.6779			5.07482	3.95213	5.17951	2.10409	7.56308	8.6779		0.0721174		1.37954	0.885312	0.54137
Q8H506	9.12042	8.62099	11.7558	13.6125	13.2571	12.9571	3	3	6			0.436296	-0.443898	2.84284	4.27109	3.35683	4.27003		2.45553						0.911842	-0.926498	5.91743	8.9621	6.77397	8.6159			0.911842	-0.926498	5.91743	8.9621	6.77397	8.6159		0.198635		6.14973	4.43569	0.0462088
Q2RA93	12.5831	13.3197	12.7984	8.24968	12.7292	12.9556	3	3	6			3.89894	4.25479	3.88543	-1.09175	2.82893	4.2685		3.00747						8.14863	8.88054	8.0876	-2.29085	5.70869	8.61282			8.14863	8.88054	8.0876	-2.29085	5.70869	8.61282		0.0121377		-4.36203	1.67809	0.312496
P0C587	9.48611	13.3494	13.1739	9.557	13.4549	12.9469	3	3	6			0.801988	4.28453	4.26094	0.215567	3.55468	4.25985		2.89626						1.67612	8.94262	8.86924	0.452328	7.17322	8.59536			1.67612	8.94262	8.86924	0.452328	7.17322	8.59536		0.958938		-1.08902	0.377075	0.769997
Q5Z9I2	12.8653	10.3367	13.1131	13.5113	7.97676	12.9247	3	3	6			4.1812	1.27184	4.20018	4.16982	-1.9235	4.23763		2.68953						8.73856	2.65457	8.74277	8.74962	-3.88156	8.55052			8.73856	2.65457	8.74277	8.74962	-3.88156	8.55052		0.38164		-2.23911	0.610646	0.654903
Q5ZDJ6	6.54944	9.68471	8.84361	8.44153	8.10664	12.8917	3	3	6			-2.13469	0.619826	-0.0693164	-0.899904	-1.79362	4.20456		-0.012191						-4.46141	1.29369	-0.144284	-1.88829	-3.61947	8.4838			-4.46141	1.29369	-0.144284	-1.88829	-3.61947	8.4838		0.346271		2.09601	0.64265	0.640535
Q10D00	13.5226	13.8359	9.50514	12.5119	10.5195	12.8794	3	3	6			4.83846	4.77097	0.592213	3.17041	0.619273	4.19226		3.0306						10.1122	9.9579	1.2327	6.65254	1.24967	8.45898			10.1122	9.9579	1.2327	6.65254	1.24967	8.45898		0.705255		-1.6472	0.567188	0.674931
A2WPU3	10.6625	9.01837	8.33713	8.88807	10.7645	12.8773	3	3	6			1.97837	-0.04652	-0.575792	-0.453364	0.864275	4.19023		0.992866						4.13471	-0.097096	-1.19852	-0.951302	1.74408	8.45489			4.13471	-0.097096	-1.19852	-0.951302	1.74408	8.45489		0.505091		2.13619	0.875426	0.545093
Q8S7M7	5.83142	10.842	9.43517	11.5406	12.3482	12.8769	3	3	6			-2.8527	1.77707	0.522247	2.19918	2.44797	4.18977		1.38059						-5.96204	3.70908	1.08707	4.61457	4.93991	8.45396			-5.96204	3.70908	1.08707	4.61457	4.93991	8.45396		0.306787		6.39144	3.16642	0.111381
Q2QSB9	13.4578	8.8308	5.10698	9.0536	9.75532	12.8605	3	3	6			4.77364	-0.234087	-3.80595	-0.287837	-0.144943	4.17345		0.745713						9.97673	-0.488583	-7.92216	-0.603974	-0.292491	8.42103			9.97673	-0.488583	-7.92216	-0.603974	-0.292491	8.42103		0.490094		1.98619	0.403032	0.756267
Q6Z5M3	9.48271	8.09961	8.95507	7.72192	9.89542	12.8407	3	3	6			0.798584	-0.965276	0.0421452	-1.61952	-0.00484119	4.15357		0.400777						1.66901	-2.01471	0.0877261	-3.39827	-0.00976937	8.38091			1.66901	-2.01471	0.0877261	-3.39827	-0.00976937	8.38091		0.169958		1.74362	0.602418	0.658649
Q6ETN3	12.7831	13.0026	12.9663	13.3304	9.35041	12.8336	3	3	6			4.099	3.93766	4.05338	3.98892	-0.549856	4.14647		3.27926						8.56675	8.21864	8.4372	8.37003	-1.10959	8.36659			8.56675	8.21864	8.4372	8.37003	-1.10959	8.36659		0.00206538		-3.19852	1.25873	0.417912
Q7XUW5	4.12416	9.50835	13.0012	14.9994	15.1159	12.8259	3	3	6			-4.55996	0.443462	4.08831	5.65795	5.21567	4.13884		2.49738						-9.53014	0.925589	8.5099	11.8722	10.5251	8.35119			-9.53014	0.925589	8.5099	11.8722	10.5251	8.35119		0.0740878		10.281	2.98921	0.125938
Q6Z3U3	13.34	13.8933	13.4594	10.4512	12.4845	12.7847	3	3	6			4.65587	4.82841	4.54651	1.10977	2.58421	4.09762		3.63707						9.73058	10.0778	9.46365	2.32866	5.21484	8.26803			9.73058	10.0778	9.46365	2.32866	5.21484	8.26803		0.0212723		-4.48684	3.07385	0.118762
Q3EBD3	13.1098	12.8915	10.1717	10.0711	10.8586	12.7783	3	3	6			4.42566	3.82663	1.25875	0.729623	0.958338	4.09123		2.54837						9.24946	7.9869	2.62012	1.53098	1.93389	8.25513			9.24946	7.9869	2.62012	1.53098	1.93389	8.25513		0.931174		-2.71216	1.27224	0.414017
Q6ESZ9	6.83782	13.5438	13.5272	12.5246	12.5568	12.7602	3	3	6			-1.84631	4.47887	4.61431	3.18315	2.65653	4.07306		2.85994						-3.85871	9.34824	9.60478	6.67927	5.36079	8.21848			-3.85871	9.34824	9.60478	6.67927	5.36079	8.21848		0.0667009		1.72141	0.468366	0.722783
Q6ZLA7	12.9416	7.37582	7.75134	13.1481	11.6833	12.7346	3	3	6			4.25747	-1.68907	-1.16158	3.80669	1.78299	4.04755		1.84068						8.89796	-3.5254	-2.41785	7.98765	3.59802	8.167			8.89796	-3.5254	-2.41785	7.98765	3.59802	8.167		0.248164		5.59932	1.95878	0.257246
Q53JI9	9.22632	5.52325	6.08347	12.5881	12.0636	12.7107	3	3	6			0.542193	-3.54164	-2.82945	3.24662	2.16333	4.02356		0.600769						1.13316	-7.39207	-5.88957	6.81245	4.36553	8.11859			1.13316	-7.39207	-5.88957	6.81245	4.36553	8.11859		0.29827		10.4817	5.55943	0.0212053
Q9SP32	12.0532	10.9031	13.1471	11.7958	12.968	12.7088	3	3	6			3.36909	1.83817	4.23422	2.45432	3.0677	4.02175		3.16421						7.04127	3.8366	8.81361	5.14994	6.19052	8.11494			7.04127	3.8366	8.81361	5.14994	6.19052	8.11494		0.524637		-0.0786926	0.0510838	0.965211
Q0E2F9	10.1222	11.8181	5.95682	13.6695	13.0181	12.6803	3	3	6			1.43806	2.75322	-2.9561	4.32811	3.11783	3.99322		2.11239						3.00549	5.74648	-6.15318	9.08176	6.29168	8.05737			3.00549	5.74648	-6.15318	9.08176	6.29168	8.05737		0.0975848		6.94401	2.91144	0.132913
Q10LH0	12.4917	9.04021	12.8723	6.51902	12.5154	12.6626	3	3	6			3.80753	-0.0246796	3.95942	-2.82241	2.61514	3.97549		1.91841						7.95759	-0.0515109	8.24163	-5.92233	5.27727	8.02158			7.95759	-0.0515109	8.24163	-5.92233	5.27727	8.02158		0.577773		-2.92373	0.751031	0.594179
Q69NP0	14.1405	7.31433	8.52301	13.3961	8.22376	12.6626	3	3	6			5.45639	-1.75055	-0.38991	4.05463	-1.6765	3.97549		1.61159						11.4036	-3.65373	-0.811607	8.50791	-3.38313	8.02158			11.4036	-3.65373	-0.811607	8.50791	-3.38313	8.02158		0.828716		2.06936	0.417028	0.748966
Q0DZP5	8.09635	7.11728	4.98308	6.29512	8.55486	12.6362	3	3	6			-0.587777	-1.94761	-3.92984	-3.04632	-1.34541	3.94908		-1.15131						-1.22843	-4.06502	-8.18004	-6.39215	-2.71499	7.9683			-1.22843	-4.06502	-8.18004	-6.39215	-2.71499	7.9683		0.360058		4.11155	1.19729	0.436092
B9G2A8	11.8489	12.3347	12.0052	13.2909	14.8242	12.6101	3	3	6			3.16477	3.26986	3.09228	3.94945	4.92395	3.92298		3.72055						6.61426	6.82481	6.43665	8.2872	9.93637	7.91565			6.61426	6.82481	6.43665	8.2872	9.93637	7.91565		0.0632159		2.08783	5.07371	0.0296934
A2YVG8	10.3646	9.5228	10.7298	9.97068	8.66242	12.5694	3	3	6			1.68045	0.45791	1.81687	0.629244	-1.23785	3.88226		1.20481						3.51207	0.955745	3.78185	1.32035	-2.49793	7.83348			3.51207	0.955745	3.78185	1.32035	-2.49793	7.83348		0.163677		-0.531253	0.19403	0.87416
Q39189	11.9702	8.76938	11.3177	11.7184	13.4972	12.496	3	3	6			3.28605	-0.295512	2.40477	2.37701	3.59696	3.80889		2.5297						6.86773	-0.616789	5.00558	4.98773	7.25855	7.68543			6.86773	-0.616789	5.00558	4.98773	7.25855	7.68543		0.243295		2.89173	1.76257	0.294723
Q7X7L3	9.6328	10.1285	12.3695	12.135	12.8811	12.4886	3	3	6			0.948672	1.06362	3.45654	2.7936	2.98081	3.80147		2.50745						1.98269	2.21998	7.19486	5.86186	6.01518	7.67047			1.98269	2.21998	7.19486	5.86186	6.01518	7.67047		0.208064		2.71666	2.28805	0.204752
Q0D8D4	11.8068	12.9806	10.4256	14.4569	14.7668	12.4771	3	3	6			3.12267	3.91568	1.51271	5.11543	4.86652	3.78998		3.7205						6.52626	8.17276	3.14874	10.7338	9.82048	7.64728			6.52626	8.17276	3.14874	10.7338	9.82048	7.64728		0.554107		3.45127	3.08075	0.118196
Q07078	12.7894	13.3467	12.7393	12.1325	13.2274	12.4607	3	3	6			4.10523	4.28177	3.82635	2.79106	3.32711	3.77357		3.68418						8.57977	8.93685	7.96463	5.85654	6.714	7.61416			8.57977	8.93685	7.96463	5.85654	6.714	7.61416		0.476879		-1.76551	4.69745	0.0385412
B5BT18	13.2604	13.6175	11.3435	10.0163	12.938	12.4548	3	3	6			4.57631	4.55258	2.4306	0.674814	3.03775	3.76772		3.1733						9.56432	9.50209	5.05934	1.41598	6.13009	7.60236			9.56432	9.50209	5.05934	1.41598	6.13009	7.60236		0.779695		-2.99244	1.84413	0.278522
Q0D715	12.273	11.9851	11.4066	11.794	13.4089	12.4106	3	3	6			3.58883	2.92024	2.49365	2.45253	3.5086	3.72346		3.11455						7.50051	6.0951	5.19059	5.1462	7.08023	7.51306			7.50051	6.0951	5.19059	5.1462	7.08023	7.51306		0.920671		0.317763	0.38758	0.764411
Q69P51	11.8717	11.301	8.55815	10.2055	10.299	12.3776	3	3	6			3.18755	2.23615	-0.354771	0.864112	0.398714	3.6905		1.67038						6.66186	4.66727	-0.738463	1.81318	0.804592	7.44654			6.66186	4.66727	-0.738463	1.81318	0.804592	7.44654		0.932674		-0.175449	0.0640928	0.956547
Q6H7U2	11.2276	9.74572	13.486	12.8781	13.812	12.3751	3	3	6			2.54349	0.680838	4.57303	3.53661	3.91171	3.688		3.15561						5.3158	1.42104	9.51886	7.42095	7.89371	7.44151			5.3158	1.42104	9.51886	7.42095	7.89371	7.44151		0.00866896		2.16682	1.14554	0.452021
P29620	10.495	8.29352	9.83495	10.8745	10.8293	12.3611	3	3	6			1.81083	-0.771369	0.922022	1.53308	0.929061	3.67397		1.3496						3.78457	-1.60999	1.91921	3.2169	1.87482	7.4132			3.78457	-1.60999	1.91921	3.2169	1.87482	7.4132		0.946933		2.80371	1.78789	0.289594
Q85431	12.7299	13.5018	12.5047	12.5233	14.0127	12.3501	3	3	6			4.04577	4.43695	3.59177	3.18183	4.11245	3.66296		3.83862						8.45551	9.26075	7.47635	6.6765	8.29878	7.39098			8.45551	9.26075	7.47635	6.6765	8.29878	7.39098		0.905814		-0.942114	2.01067	0.248158
Q9ZU28	12.6891	10.0697	8.94828	7.70605	10.67	12.3206	3	3	6			4.00498	1.00483	0.0353561	-1.63539	0.769772	3.63351		1.30218						8.37025	2.09727	0.0735946	-3.43157	1.55337	7.33156			8.37025	2.09727	0.0735946	-3.43157	1.55337	7.33156		0.784183		-1.69592	0.52996	0.692574
Q6EVK6	10.7598	12.2642	9.97039	12.6758	12.6423	12.3185	3	3	6			2.07568	3.19935	1.05747	3.33434	2.74208	3.63139		2.67339						4.3381	6.67764	2.20115	6.99652	5.53343	7.32729			4.3381	6.67764	2.20115	6.99652	5.53343	7.32729		0.307647		2.21345	2.39322	0.190358
Q84T65	8.99551	12.7349	12.5427	12.9894	13.0309	12.3131	3	3	6			0.31139	3.66999	3.62979	3.64792	3.13066	3.62599		3.00262						0.650792	7.65996	7.55549	7.65451	6.31757	7.31638			0.650792	7.65996	7.55549	7.65451	6.31757	7.31638		0.0581533		1.8074	1.04287	0.48536
Q7XPF8	9.01016	14.0986	7.00079	14.3771	14.2161	12.3004	3	3	6			0.326041	5.03372	-1.91213	5.03564	4.31587	3.61334		2.73541						0.681414	10.5063	-3.98015	10.5664	8.70929	7.29087			0.681414	10.5063	-3.98015	10.5664	8.70929	7.29087		0.094042		6.45299	2.22349	0.214123
Q2QTC2	10.459	9.37289	9.21735	12.8342	10.8451	12.2981	3	3	6			1.7749	0.308	0.304428	3.49276	0.944833	3.61105		1.73933						3.70947	0.642853	0.633674	7.32892	1.90664	7.28625			3.70947	0.642853	0.633674	7.32892	1.90664	7.28625		0.488674		3.84527	2.8685	0.136929
Q9FIT1	8.83419	9.73066	11.9676	11.9834	10.811	12.2743	3	3	6			0.150063	0.66577	3.05466	2.64195	0.910708	3.58717		1.83505						0.313627	1.38959	6.35835	5.54365	1.83778	7.23805			0.313627	1.38959	6.35835	5.54365	1.83778	7.23805		0.846351		2.18597	1.2416	0.422903
F4ILR7	9.65851	12.7776	11.8955	11.5268	12.5844	12.2635	3	3	6			0.974392	3.71268	2.98261	2.1854	2.68418	3.57638		2.68594						2.03644	7.74905	6.20837	4.58568	5.41659	7.21629			2.03644	7.74905	6.20837	4.58568	5.41659	7.21629		0.343		0.408228	0.2545	0.838278
Q67VW6	10.3097	10.4791	9.82306	14.1341	14.4358	12.2477	3	3	6			1.62558	1.41419	0.910141	4.79267	4.53554	3.56057		2.80645						3.3974	2.95167	1.89448	10.0565	9.15256	7.18438			3.3974	2.95167	1.89448	10.0565	9.15256	7.18438		0.432942		6.04998	8.28134	0.00321415
Q2QMX9	11.6292	7.60133	8.39973	9.20457	9.53644	12.229	3	3	6			2.9451	-1.46356	-0.513197	-0.136866	-0.363824	3.54187		0.668254						6.15514	-3.05473	-1.06823	-0.287189	-0.734184	7.14666			6.15514	-3.05473	-1.06823	-0.287189	-0.734184	7.14666		0.909579		1.36437	0.440191	0.737037
Q6YS30	7.58218	9.00851	12.3961	7.9935	10.1417	12.2184	3	3	6			-1.10194	-0.0563744	3.48317	-1.34793	0.241459	3.53129		0.791611						-2.30302	-0.117664	7.2503	-2.82839	0.487256	7.1253			-2.30302	-0.117664	7.2503	-2.82839	0.487256	7.1253		0.987504		-0.0151505	0.00399147	0.997237
F4I9Q5	12.0296	12.0032	10.4423	13.6288	13.3457	12.2176	3	3	6			3.34547	2.93835	1.5294	4.28735	3.44542	3.53053		3.17942						6.99191	6.13289	3.18347	8.99623	6.95274	7.12377			6.99191	6.13289	3.18347	8.99623	6.95274	7.12377		0.487243		2.25482	2.60575	0.164282
Q6K3T2	10.1115	10.8892	11.147	10.6207	10.779	12.215	3	3	6			1.4274	1.82431	2.23409	1.27924	0.878716	3.52795		1.86195						2.98322	3.80768	4.65031	2.68426	1.77322	7.11857			2.98322	3.80768	4.65031	2.68426	1.77322	7.11857		0.156624		0.044946	0.0285558	0.980401
Q7XPF7	7.92843	12.4397	9.80142	9.29875	11.1174	12.2065	3	3	6			-0.755694	3.37481	0.888494	-0.0426873	1.21712	3.51937		1.3669						-1.57937	7.04387	1.84942	-0.0895715	2.45611	7.10125			-1.57937	7.04387	1.84942	-0.0895715	2.45611	7.10125		0.827167		0.717956	0.256482	0.837127
F4IM84	10.9651	11.3978	10.1558	11.524	12.6048	12.1971	3	3	6			2.28094	2.33289	1.24291	2.18252	2.7045	3.51		2.37563						4.76708	4.86919	2.58714	4.57962	5.45759	7.08235			4.76708	4.86919	2.58714	4.57962	5.45759	7.08235		0.984932		1.63205	2.37136	0.193263
Q6K765	8.40735	14.1268	11.2118	10.0157	11.4164	12.1911	3	3	6			-0.276771	5.0619	2.2989	0.674257	1.51611	3.50397		2.12973						-0.57844	10.5651	4.78522	1.41481	3.05946	7.07017			-0.57844	10.5651	4.78522	1.41481	3.05946	7.07017		0.428237		-1.07582	0.355362	0.781674
Q657X6	12.2591	11.8163	12.3572	9.9291	11.6321	12.1826	3	3	6			3.57497	2.75146	3.44433	0.587658	1.73187	3.49552		2.59763						7.47156	5.74281	7.16944	1.2331	3.49485	7.05312			7.47156	5.74281	7.16944	1.2331	3.49485	7.05312		0.180222		-2.86758	2.46068	0.181661
Q7XD96	11.4361	11.248	12.1973	11.1468	11.0821	12.162	3	3	6			2.75196	2.18316	3.28435	1.80539	1.18182	3.47492		2.44693						5.7515	4.55666	6.83645	3.78828	2.38487	7.01156			5.7515	4.55666	6.83645	3.78828	2.38487	7.01156		0.375398		-1.31997	1.20399	0.434073
Q7XTG7	12.8001	13.239	13.0798	9.06018	10.6374	12.1515	3	3	6			4.11593	4.17411	4.16689	-0.281255	0.737175	3.46437		2.72954						8.60213	8.71216	8.67348	-0.590162	1.4876	6.99027			8.60213	8.71216	8.67348	-0.590162	1.4876	6.99027		0.000406041		-6.03336	3.10244	0.116432
Q7XD99	11.4991	11.8274	13.9654	13.3403	15.0432	12.1396	3	3	6			2.81498	2.7625	5.0525	3.99883	5.14289	3.45255		3.87071						5.88319	5.76585	10.5169	8.39082	10.3782	6.96643			5.88319	5.76585	10.5169	8.39082	10.3782	6.96643		0.571328		1.18984	0.848518	0.555355
Q5N749	11.8965	12.1981	10.9458	11.481	13.5358	12.1395	3	3	6			3.21236	3.13325	2.03289	2.13955	3.6355	3.45239		2.93432						6.71371	6.53968	4.2315	4.48947	7.33631	6.96611			6.71371	6.53968	4.2315	4.48947	7.33631	6.96611		0.889711		0.435668	0.444552	0.734813
F4KGU4	10.0473	10.9806	11.1358	11.8643	11.8509	12.1233	3	3	6			1.36314	1.91568	2.22291	2.5229	1.95059	3.43622		2.23524						2.8489	3.99839	4.62704	5.29386	3.93622	6.93347			2.8489	3.99839	4.62704	5.29386	3.93622	6.93347		0.530441		1.56307	2.34417	0.19694
Q0JLS6	9.91067	11.1461	6.0262	11.3172	12.3314	12.121	3	3	6			1.22655	2.08124	-2.88672	1.97575	2.4311	3.43386		1.37696						2.56344	4.34393	-6.00877	4.14575	4.90588	6.92871			2.56344	4.34393	-6.00877	4.14575	4.90588	6.92871		0.126519		5.02725	2.30374	0.202537
B9F4I8	8.51842	10.1379	12.2371	9.89332	10.9	12.1196	3	3	6			-0.165706	1.073	3.32414	0.551879	0.999772	3.4325		1.53593						-0.34632	2.23955	6.91926	1.15802	2.01751	6.92596			-0.34632	2.23955	6.91926	1.15802	2.01751	6.92596		0.83313		0.429663	0.176567	0.884806
Q0D3S3	9.39453	10.7058	10.8985	11.468	12.4991	12.1029	3	3	6			0.710404	1.64092	1.9856	2.12658	2.59883	3.41583		2.07969						1.48472	3.4249	4.13307	4.46224	5.24436	6.89234			1.48472	3.4249	4.13307	4.46224	5.24436	6.89234		0.900224		2.51875	3.68576	0.0777096
Q10GP0	10.9609	10.0848	9.38437	11.0961	9.4523	12.1006	3	3	6			2.27675	1.01992	0.47145	1.75462	-0.447962	3.41347		1.41471						4.75832	2.12877	0.981334	3.68175	-0.903973	6.88757			4.75832	2.12877	0.981334	3.68175	-0.903973	6.88757		0.392918		0.598978	0.279365	0.823954
F4HYJ7	11.9519	12.6738	9.82739	10.599	10.5511	12.0957	3	3	6			3.26778	3.60891	0.914467	1.25755	0.650866	3.4086		2.18469						6.82954	7.53247	1.90348	2.63873	1.31343	6.87774			6.82954	7.53247	1.90348	2.63873	1.31343	6.87774		0.94625		-1.81186	1.00311	0.498924
Q6YXY2	10.0869	11.3749	11.2931	10.9689	12.0184	12.0906	3	3	6			1.40281	2.30999	2.38015	1.62745	2.11818	3.40351		2.20701						2.93182	4.82138	4.95432	3.4149	4.27442	6.86748			2.93182	4.82138	4.95432	3.4149	4.27442	6.86748		0.567492		0.616426	0.640324	0.641569
Q6AUR2	12.0257	5.49169	12.2614	11.4976	12.0478	12.082	3	3	6			3.3416	-3.57319	3.3485	2.15612	2.14754	3.39489		1.80258						6.98383	-7.45793	6.96996	4.52422	4.33367	6.85008			6.98383	-7.45793	6.96996	4.52422	4.33367	6.85008		0.0549735		3.0707	0.828093	0.563273
Q69XM6	11.4284	12.3883	12.1013	12.0695	11.0296	12.0582	3	3	6			2.74429	3.32343	3.18836	2.72808	1.12937	3.3711		2.74744						5.73546	6.93661	6.63664	5.72438	2.27903	6.80208			5.73546	6.93661	6.63664	5.72438	2.27903	6.80208		0.130872		-1.50108	1.52554	0.34735
A0A0P0WGX7	9.19545	9.97068	14.2228	13.3778	14.9692	12.0469	3	3	6			0.511323	0.905794	5.30987	4.03632	5.06894	3.35983		3.19868						1.06865	1.89056	11.0526	8.46948	10.229	6.77933			1.06865	1.89056	11.0526	8.46948	10.229	6.77933		0.176624		3.82198	1.6541	0.317736
Q3EBC8	10.2047	7.57183	11.3591	11.8424	12.0745	12.0464	3	3	6			1.52057	-1.49306	2.44617	2.50091	2.17421	3.35931		1.75135						3.17793	-3.11629	5.09175	5.24771	4.38749	6.7783			3.17793	-3.11629	5.09175	5.24771	4.38749	6.7783		0.147319		3.75337	2.19205	0.218841
B9GE13	11.4725	11.9449	12.0388	12.7772	13.2542	12.0426	3	3	6			2.78836	2.88004	3.12589	3.43578	3.35391	3.35549		3.15658						5.82758	6.01119	6.50661	7.20936	6.76808	6.77058			5.82758	6.01119	6.50661	7.20936	6.76808	6.77058		0.686936		0.800877	4.92566	0.0329025
Q8VY00	11.6916	11.223	11.9473	12.2455	12.9522	12.0345	3	3	6			3.00745	2.15809	3.03438	2.90406	3.05195	3.34743		2.91723						6.28545	4.50434	6.31614	6.09364	6.15873	6.75432			6.28545	4.50434	6.31614	6.09364	6.15873	6.75432		0.219395		0.633589	1.41635	0.374658
Q9FIY7	11.0482	9.79855	8.24308	10.8854	12.0204	12.0258	3	3	6			2.36409	0.733666	-0.669845	1.54395	2.12012	3.33867		1.57178						4.94086	1.5313	-1.3943	3.23971	4.27834	6.73664			4.94086	1.5313	-1.3943	3.23971	4.27834	6.73664		0.485773		3.05894	2.1869	0.219623
Q5W676	9.20574	10.5294	9.72144	11.2177	10.754	12.0151	3	3	6			0.521621	1.46454	0.808518	1.87628	0.853704	3.32797		1.47544						1.09017	3.05678	1.68295	3.93703	1.72275	6.71506			1.09017	3.05678	1.68295	3.93703	1.72275	6.71506		0.279787		2.18165	2.09645	0.233832
Q8H136	11.1176	10.2181	11.7102	12.275	12.7412	12.0135	3	3	6			2.43352	1.15319	2.79728	2.93361	2.84091	3.32637		2.58081						5.08596	2.40693	5.8226	6.15565	5.73286	6.71182			5.08596	2.40693	5.8226	6.15565	5.73286	6.71182		0.13886		1.76161	2.49918	0.176877
Q0D622	11.4841	11.4788	10.5548	13.3783	13.6383	11.9996	3	3	6			2.79999	2.41388	1.64186	4.03686	3.73806	3.31248		2.99052						5.85188	5.03823	3.41756	8.47062	7.54328	6.6838			5.85188	5.03823	3.41756	8.47062	7.54328	6.6838		0.684192		2.79668	4.88502	0.0338426
Q10LJ0	10.4974	9.12368	9.98371	12.5436	12.4447	11.9993	3	3	6			1.81323	0.0587946	1.07078	3.20217	2.54447	3.31224		2.00028						3.78958	0.122715	2.22886	6.71919	5.13465	6.68331			3.78958	0.122715	2.22886	6.71919	5.13465	6.68331		0.389281		4.132	5.31517	0.0251175
Q6H638	11.1396	14.6741	11.0314	8.96731	11.7534	11.9976	3	3	6			2.45549	5.60925	2.11843	-0.374124	1.85312	3.31047		2.49544						5.13188	11.7076	4.40956	-0.785033	3.73953	6.67975			5.13188	11.7076	4.40956	-0.785033	3.73953	6.67975		0.933013		-3.87159	1.78514	0.290147
Q9LIH9	11.4226	7.60489	10.0226	7.4614	11.269	11.9918	3	3	6			2.73847	-1.46	1.10972	-1.88004	1.36874	3.30471		0.863601						5.72329	-3.04729	2.30991	-3.94492	2.76208	6.66812			5.72329	-3.04729	2.30991	-3.94492	2.76208	6.66812		0.808363		0.166458	0.0455563	0.968916
Q8L7S8	9.87646	9.62952	10.808	8.34917	10.8849	11.9784	3	3	6			1.19233	0.564633	1.89508	-0.992267	0.984592	3.29129		1.15594						2.49193	1.1785	3.94464	-2.08209	1.98688	6.64105			2.49193	1.1785	3.94464	-2.08209	1.98688	6.64105		0.182626		-0.35641	0.153178	0.899267
O64937	13.481	13.7654	11.4799	13.4144	14.1778	11.9726	3	3	6			4.79692	4.7005	2.56696	4.07298	4.27754	3.28549		3.95007						10.0254	9.81083	5.34318	8.54642	8.63194	6.62934			10.0254	9.81083	5.34318	8.54642	8.63194	6.62934		0.310062		-0.457227	0.327955	0.796665
Q10S82	11.4322	11.0149	11.7417	12.5894	12.1629	11.9585	3	3	6			2.74811	1.94997	2.82875	3.248	2.2626	3.27142		2.71814						5.74344	4.06995	5.88811	6.81535	4.56585	6.60095			5.74344	4.06995	5.88811	6.81535	4.56585	6.60095		0.797029		0.760217	1.12984	0.456967
Q0DG05	10.3367	10.058	12.1337	13.3444	12.8502	11.9525	3	3	6			1.65261	0.993105	3.2208	4.003	2.94992	3.26536		2.6808						3.45388	2.0728	6.70416	8.39957	5.95285	6.58871			3.45388	2.0728	6.70416	8.39957	5.95285	6.58871		0.443666		2.90343	2.88365	0.135499
Q93VB5	5.98204	11.3345	8.3936	7.97241	11.818	11.9502	3	3	6			-2.70209	2.26961	-0.519319	-1.36903	1.91776	3.26306		0.476665						-5.64726	4.7371	-1.08097	-2.87267	3.86997	6.58408			-5.64726	4.7371	-1.08097	-2.87267	3.86997	6.58408		0.933476		3.19084	1.05475	0.481382
Q7XZF7	11.3667	10.1157	11.0242	11.8695	12.3826	11.9446	3	3	6			2.68258	1.05081	2.11125	2.52808	2.48236	3.25751		2.3521						5.60649	2.19323	4.3946	5.30472	5.00932	6.57288			5.60649	2.19323	4.3946	5.30472	5.00932	6.57288		0.374589		1.5642	2.11441	0.230941
Q10DK7	9.62	9.12988	9.92279	10.9301	10.808	11.9418	3	3	6			0.935877	0.0649883	1.00987	1.58871	0.907734	3.25472		1.29365						1.95595	0.135643	2.10206	3.33362	1.83178	6.56726			1.95595	0.135643	2.10206	3.33362	1.83178	6.56726		0.340195		2.513	2.50105	0.176648
Q6K972	11.6587	12.3913	9.6865	11.7104	11.1737	11.9256	3	3	6			2.97458	3.32638	0.773577	2.36894	1.27347	3.23846		2.3259						6.21676	6.94279	1.61022	4.97079	2.56983	6.53444			6.21676	6.94279	1.61022	4.97079	2.56983	6.53444		0.645725		-0.231566	0.128724	0.91464
Q9SQX9	11.4483	12.0959	11.6111	11.3631	13.886	11.9192	3	3	6			2.7642	3.031	2.69815	2.02171	3.98572	3.2321		2.95548						5.77707	6.32628	5.61625	4.2422	8.04305	6.52162			5.77707	6.32628	5.61625	4.2422	8.04305	6.52162		0.0729859		0.362422	0.389286	0.763507
Q5VSA8	11.1945	9.70233	13.9217	8.37981	11.0102	11.9137	3	3	6			2.51039	0.637441	5.00873	-0.961626	1.10998	3.22658		1.92192						5.24661	1.33046	10.4258	-2.0178	2.23991	6.51047			5.24661	1.33046	10.4258	-2.0178	2.23991	6.51047		0.932526		-3.42342	1.33598	0.396122
Q6Z5J6	11.1972	11.7026	10.629	11.8931	11.386	11.8953	3	3	6			2.51303	2.63776	1.71607	2.55164	1.48576	3.20818		2.35207						5.25214	5.5055	3.57203	5.35415	2.99821	6.47334			5.25214	5.5055	3.57203	5.35415	2.99821	6.47334		0.519531		0.165342	0.158043	0.89624
Q6Z965	8.9257	8.98937	12.1031	9.97685	10.4444	11.8931	3	3	6			0.24158	-0.075521	3.1902	0.635413	0.544129	3.20606		1.29031						0.504892	-0.157626	6.64047	1.3333	1.09803	6.46906			0.504892	-0.157626	6.64047	1.3333	1.09803	6.46906		0.792094		0.637553	0.268581	0.830136
Q9AUR8	11.3736	12.2568	11.9098	11.6179	11.6247	11.8819	3	3	6			2.68945	3.19188	2.99686	2.27644	1.72439	3.19482		2.67897						5.62085	6.66206	6.23802	4.77671	3.47977	6.44639			5.62085	6.66206	6.23802	4.77671	3.47977	6.44639		0.220552		-1.27268	2.09155	0.234628
Q0DB53	10.5154	10.5391	9.946	11.3229	12.0007	11.8794	3	3	6			1.83128	1.47417	1.03308	1.9815	2.1004	3.19226		1.93545						3.82731	3.07688	2.15037	4.15783	4.23855	6.44122			3.82731	3.07688	2.15037	4.15783	4.23855	6.44122		0.591881		1.92768	3.37123	0.0966404
Q6L4L4	9.51558	10.1053	10.1348	9.25219	11.5593	11.8771	3	3	6			0.831458	1.04037	1.22189	-0.0892449	1.65902	3.19		1.30891						1.73772	2.17144	2.54339	-0.187264	3.34784	6.43666			1.73772	2.17144	2.54339	-0.187264	3.34784	6.43666		0.0291693		1.04823	0.644462	0.639731
Q6YZ52	9.29163	11.0267	8.46091	12.3502	13.2365	11.8677	3	3	6			0.607508	1.96177	-0.452017	3.00881	3.33621	3.18061		1.94048						1.26967	4.09459	-0.940883	6.31345	6.73237	6.41771			1.26967	4.09459	-0.940883	6.31345	6.73237	6.41771		0.0148215		5.01338	3.75572	0.0740312
A2YH41	10.3219	9.83403	11.1317	12.824	12.872	11.857	3	3	6			1.6378	0.769141	2.21874	3.48261	2.97174	3.16995		2.375						3.42295	1.60534	4.61836	7.30762	5.99687	6.39621			3.42295	1.60534	4.61836	7.30762	5.99687	6.39621		0.327888		3.35135	5.32577	0.0249336
Q94BV4	10.1213	12.177	9.29494	11.671	10.5326	11.8456	3	3	6			1.43715	3.1121	0.382019	2.32957	0.632383	3.15847		1.84195						3.00359	6.49553	0.79518	4.88819	1.27613	6.37305			3.00359	6.49553	0.79518	4.88819	1.27613	6.37305		0.908208		0.747689	0.403694	0.75592
Q0JNB6	11.0802	11.5819	11.1248	11.6606	11.5426	11.838	3	3	6			2.39609	2.51697	2.21184	2.31918	1.64238	3.15093		2.3729						5.00775	5.25339	4.604	4.86639	3.31427	6.35782			5.00775	5.25339	4.604	4.86639	3.31427	6.35782		0.0887194		-0.108887	0.136984	0.909418
Q53WJ1	9.22673	10.2976	11.4797	11.0763	11.7739	11.8268	3	3	6			0.542602	1.23272	2.56681	1.73484	1.87362	3.13969		1.84838						1.13402	2.57291	5.34286	3.64026	3.7809	6.33515			1.13402	2.57291	5.34286	3.64026	3.7809	6.33515		0.66918		1.56884	1.47934	0.358653
Q53RB0	10.0723	9.92065	10.2973	11.7657	12.3727	11.8064	3	3	6			1.38814	0.855763	1.38434	2.42426	2.47241	3.11929		1.9407						2.90117	1.78614	2.88153	5.08688	4.98924	6.29399			2.90117	1.78614	2.88153	5.08688	4.98924	6.29399		0.870737		2.93376	7.31488	0.00628062
Q5VN06	11.5414	13.2661	11.8482	11.3094	11.4806	11.8027	3	3	6			2.85731	4.20123	2.93523	1.96793	1.58032	3.11562		2.77627						5.97167	8.76875	6.10974	4.12934	3.18904	6.28659			5.97167	8.76875	6.10974	4.12934	3.18904	6.28659		0.992688		-2.41507	2.88957	0.134944
Q7Y183	9.90492	8.51944	10.1092	8.50768	8.11244	11.7975	3	3	6			1.2208	-0.545447	1.19625	-0.833761	-1.78783	3.11041		0.393404						2.55142	-1.13845	2.49003	-1.7495	-3.60777	6.27606			2.55142	-1.13845	2.49003	-1.7495	-3.60777	6.27606		0.278518		-0.994737	0.365745	0.776068
P17784	12.5894	12.1212	11.4984	11.799	12.8786	11.7948	3	3	6			3.90532	3.05635	2.58543	2.45752	2.97834	3.10769		3.01511						8.16196	6.37919	5.38162	5.15666	6.0102	6.27057			8.16196	6.37919	5.38162	5.15666	6.0102	6.27057		0.292251		-0.828446	1.32258	0.39982
Q6ZFZ4	9.8075	10.1718	11.1434	11.2997	10.4512	11.788	3	3	6			1.12338	1.10692	2.23046	1.95823	0.550946	3.10089		1.67847						2.34781	2.31034	4.64275	4.10899	1.11179	6.25686			2.34781	2.31034	4.64275	4.10899	1.11179	6.25686		0.42178		0.725579	0.539508	0.688006
Q10SX7	10.4557	9.74335	9.92834	10.6369	10.9878	11.7876	3	3	6			1.77161	0.678466	1.01542	1.29546	1.0875	3.10048		1.49149						3.70261	1.41609	2.11361	2.71829	2.19453	6.25604			3.70261	1.41609	2.11361	2.71829	2.19453	6.25604		0.439149		1.31218	1.2693	0.414861
W0RYD3	9.86264	12.2331	14.218	13.0958	12.1911	11.7842	3	3	6			1.17851	3.16816	5.30503	3.75437	2.29079	3.09713		3.13233						2.46305	6.61255	11.0425	7.87787	4.62275	6.24928			2.46305	6.61255	11.0425	7.87787	4.62275	6.24928		0.251594		-0.456082	0.198129	0.87168
Q948T6	7.80896	10.6772	8.63416	12.978	13.198	11.7816	3	3	6			-0.875159	1.6123	-0.278766	3.63656	3.29773	3.09451		1.74786						-1.82905	3.36518	-0.580257	7.63066	6.65472	6.24399			-1.82905	3.36518	-0.580257	7.63066	6.65472	6.24399		0.129121		6.5245	5.99153	0.015717
Q7FAH2	12.4203	14.4721	11.7126	12.6514	13.0136	11.7613	3	3	6			3.73621	5.40717	2.79965	3.30995	3.11332	3.07417		3.57341						7.80853	11.2858	5.82752	6.94533	6.28258	6.20294			7.80853	11.2858	5.82752	6.94533	6.28258	6.20294		0.0425914		-1.83033	1.43493	0.369865
F4HW51	12.4871	12.4826	13.5378	12.664	12.2951	11.7597	3	3	6			3.80296	3.41774	4.6249	3.32261	2.39482	3.07263		3.43928						7.94805	7.13347	9.62683	6.9719	4.83266	6.19983			7.94805	7.13347	9.62683	6.9719	4.83266	6.19983		0.841276		-2.23465	3.61909	0.0813853
Q84YL3	5.49911	8.95096	10.5113	9.32728	10.0438	11.7543	3	3	6			-3.18501	-0.113923	1.59834	-0.014154	0.143583	3.06717		0.249333						-6.65655	-0.237779	3.32697	-0.0296997	0.289745	6.18881			-6.65655	-0.237779	3.32697	-0.0296997	0.289745	6.18881		0.647775		3.33874	1.32011	0.400503
Q0J2B5	9.87906	9.94046	9.91464	11.7099	13.0906	11.754	3	3	6			1.19494	0.875573	1.00172	2.36842	3.19036	3.06692		1.94965						2.49738	1.82749	2.08509	4.96971	6.43804	6.18831			2.49738	1.82749	2.08509	4.96971	6.43804	6.18831		0.312225		3.7287	9.24538	0.00164764
Q6K9F6	9.15833	10.567	13.2123	10.7669	11.8814	11.7527	3	3	6			0.474209	1.50212	4.29934	1.42542	1.98112	3.06562		2.12464						0.991078	3.1352	8.94918	2.99099	3.99783	6.18569			0.991078	3.1352	8.94918	2.99099	3.99783	6.18569		0.271903		0.0330194	0.0140372	0.990317
Q6ZJJ0	11.0067	9.01653	10.9725	10.5037	10.3614	11.7479	3	3	6			2.32262	-0.0483574	2.05955	1.16229	0.461131	3.06085		1.50301						4.85419	-0.100931	4.287	2.43885	0.930546	6.17606			4.85419	-0.100931	4.287	2.43885	0.930546	6.17606		0.99577		0.168398	0.0848059	0.942911
Q6ENJ0	12.4661	12.4692	12.0355	12.2844	13.0414	11.7404	3	3	6			3.782	3.4043	3.12256	2.94298	3.14115	3.05332		3.24105						7.90424	7.10541	6.49968	6.17532	6.33875	6.16087			7.90424	7.10541	6.49968	6.17532	6.33875	6.16087		0.0385708		-0.944798	2.80268	0.143321
Q6YRM6	12.2808	12.3368	12.0244	11.8111	12.2634	11.7373	3	3	6			3.59665	3.27195	3.11149	2.46962	2.36309	3.05024		2.97717						7.51686	6.82918	6.47663	5.18204	4.76864	6.15465			7.51686	6.82918	6.47663	5.18204	4.76864	6.15465		0.711978		-1.57244	4.74726	0.0372333
A4PBL4	12.1126	9.89442	10.5854	10.4452	10.6535	11.7354	3	3	6			3.42851	0.829537	1.67251	1.10378	0.753207	3.04829		1.80597						7.16546	1.7314	3.48136	2.31609	1.51995	6.15073			7.16546	1.7314	3.48136	2.31609	1.51995	6.15073		0.886897		-0.79715	0.455587	0.729213
Q6ENE8	12.6592	12.5238	11.929	10.7166	13.7264	11.7272	3	3	6			3.97511	3.45887	3.01608	1.37521	3.82617	3.0401		3.11526						8.30784	7.21931	6.27803	2.88563	7.72108	6.13421			8.30784	7.21931	6.27803	2.88563	7.72108	6.13421		0.290359		-1.68809	1.58057	0.33435
Q53RK8	7.82699	11.5901	13.3487	13.2824	9.9444	11.7202	3	3	6			-0.85713	2.52523	4.4358	3.94094	0.0441396	3.03315		2.18702						-1.79137	5.27063	9.23322	8.26935	0.0890723	6.12018			-1.79137	5.27063	9.23322	8.26935	0.0890723	6.12018		0.731531		0.588706	0.165826	0.891418
Q5MGA9	8.88231	8.85854	7.75174	5.83842	11.1701	11.7173	3	3	6			0.198184	-0.206347	-1.16118	-3.50301	1.26985	3.03024		-0.0620448						0.414196	-0.430684	-2.41702	-7.35044	2.56251	6.1143			0.414196	-0.430684	-2.41702	-7.35044	2.56251	6.1143		0.0831546		1.25329	0.366048	0.775905
Q10MN5	9.3151	10.8887	10.1281	9.6536	10.7596	11.7162	3	3	6			0.630981	1.82378	1.2152	0.31216	0.85929	3.02908		1.31175						1.31873	3.80657	2.52946	0.655012	1.73402	6.11197			1.31873	3.80657	2.52946	0.655012	1.73402	6.11197		0.312693		0.28208	0.177691	0.884117
Q85429	11.2847	12.1582	10.4172	11.6002	10.4867	11.7024	3	3	6			2.60059	3.09334	1.5043	2.25875	0.586469	3.01534		2.17646						5.43512	6.45639	3.13122	4.73959	1.18348	6.08424			5.43512	6.45639	3.13122	4.73959	1.18348	6.08424		0.623047		-1.00515	0.739685	0.59887
Q5Z922	11.4858	11.8353	11.4194	8.853	5.73939	11.6832	3	3	6			2.80171	2.77041	2.50646	-0.48844	-4.16088	2.99612		1.0709						5.85546	5.78237	5.21724	-1.0249	-8.39651	6.04546			5.85546	5.78237	5.21724	-1.0249	-8.39651	6.04546		0.00466806		-6.74368	2.01747	0.246992
Q6ENE2	9.85887	10.1011	8.02497	9.27543	13.7664	11.6808	3	3	6			1.17474	1.03617	-0.88795	-0.066011	3.86616	2.99366		1.3528						2.45517	2.16268	-1.84829	-0.138512	7.80179	6.0405			2.45517	2.16268	-1.84829	-0.138512	7.80179	6.0405		0.499097		3.64474	1.94391	0.259911
O48534	11.5416	11.8428	11.4867	11.0481	12.985	11.6711	3	3	6			2.85746	2.77793	2.57381	1.70664	3.08471	2.984		2.66409						5.97198	5.79807	5.35744	3.58108	6.22483	6.02101			5.97198	5.79807	5.35744	3.58108	6.22483	6.02101		0.0886259		-0.433522	0.634917	0.643978
Q8LIG4	9.31553	9.23129	12.4814	12.2295	11.1684	11.6681	3	3	6			0.631411	0.166406	3.56852	2.88804	1.26816	2.98104		1.91726						1.31963	0.347321	7.42796	6.06004	2.5591	6.01503			1.31963	0.347321	7.42796	6.06004	2.5591	6.01503		0.429897		1.84642	0.996173	0.501328
A4PBP6	9.557	10.8794	11.0137	10.6261	12.3842	11.6652	3	3	6			0.872881	1.81447	2.10075	1.28464	2.4839	2.97811		1.92246						1.82429	3.78713	4.37275	2.69558	5.01243	6.00912			1.82429	3.78713	4.37275	2.69558	5.01243	6.00912		0.762752		1.24432	1.4145	0.37514
Q6YYA3	9.8552	9.84731	8.31266	11.9791	11.7769	11.661	3	3	6			1.17107	0.782421	-0.600267	2.63767	1.87666	2.97393		1.47358						2.4475	1.63306	-1.24947	5.53467	3.78704	6.00068			2.4475	1.63306	-1.24947	5.53467	3.78704	6.00068		0.530424		4.16377	4.90162	0.0334554
Q7XH85	7.86925	7.57274	7.85985	9.79093	12.8564	11.6594	3	3	6			-0.814869	-1.49215	-1.05308	0.449498	2.9561	2.97232		0.502971						-1.70304	-3.1144	-2.192	0.94319	5.96532	5.99744			-1.70304	-3.1144	-2.192	0.94319	5.96532	5.99744		0.114459		6.63846	5.75709	0.0184903
Q84T61	7.70646	9.01413	9.29719	11.9015	9.04974	11.6579	3	3	6			-0.977662	-0.050755	0.384268	2.56003	-0.850525	2.9708		0.672694						-2.04328	-0.105935	0.799862	5.37177	-1.71633	5.99438			-2.04328	-0.105935	0.799862	5.37177	-1.71633	5.99438		0.206242		3.66639	2.10169	0.232985
Q75HC2	11.0039	11.5152	10.6463	11.1108	11.699	11.6181	3	3	6			2.31982	2.45027	1.73337	1.76937	1.7987	2.93102		2.16709						4.84833	5.11418	3.60804	3.71271	3.62972	5.91409			4.84833	5.11418	3.60804	3.71271	3.62972	5.91409		0.555954		-0.104673	0.134346	0.911083
Q0D5P3	9.36606	7.88673	7.0663	12.024	11.7908	11.6075	3	3	6			0.681937	-1.17815	-1.84662	2.68256	1.89049	2.92038		0.858431						1.42522	-2.45903	-3.84378	5.62887	3.81495	5.89262			1.42522	-2.45903	-3.84378	5.62887	3.81495	5.89262		0.292755		6.73801	5.8908	0.0168535
Q653P0	10.6285	9.32319	12.3464	9.28623	11.4139	11.5967	3	3	6			1.94441	0.258303	3.43345	-0.0552029	1.51363	2.90961		1.66737						4.06375	0.539126	7.1468	-0.115833	3.05445	5.8709			4.06375	0.539126	7.1468	-0.115833	3.05445	5.8709		0.901472		-0.980054	0.468103	0.722915
Q9LYR0	9.04273	12.8181	10.2331	10.4367	10.6761	11.5926	3	3	6			0.358603	3.75326	1.32022	1.09527	0.775868	2.90555		1.70146						0.749467	7.83375	2.74806	2.29824	1.56568	5.86271			0.749467	7.83375	2.74806	2.29824	1.56568	5.86271		0.567444		-0.534885	0.250636	0.840526
Q5N7W3	10.9301	9.73142	7.7987	12.1192	10.7347	11.5771	3	3	6			2.24602	0.666534	-1.11422	2.77773	0.834445	2.89		1.38342						4.6941	1.39118	-2.31928	5.82857	1.68388	5.83134			4.6941	1.39118	-2.31928	5.82857	1.68388	5.83134		0.635227		3.1926	1.92763	0.262861
Q8H2X8	11.3683	16.3735	12.4413	11.1797	12.5022	11.5676	3	3	6			2.68416	7.30861	3.52839	1.83829	2.6019	2.88048		3.47364						5.6098	15.2544	7.34441	3.85731	5.25054	5.81213			5.6098	15.2544	7.34441	3.85731	5.25054	5.81213		0.0738159		-4.42956	2.20478	0.216917
Q1WM15	10.3295	10.5265	8.3933	14.3515	10.0871	11.5674	3	3	6			1.64534	1.46161	-0.519619	5.01005	0.1868	2.88029		1.77741						3.43869	3.05066	-1.0816	10.5127	0.376956	5.81174			3.43869	3.05066	-1.0816	10.5127	0.376956	5.81174		0.392225		3.76455	1.67448	0.31328
Q5VMQ5	9.38219	9.21318	10.0066	10.6591	9.1817	11.5673	3	3	6			0.698068	0.14829	1.09368	1.31767	-0.718566	2.88024		0.903231						1.45894	0.309509	2.27652	2.76489	-1.45004	5.81165			1.45894	0.309509	2.27652	2.76489	-1.45004	5.81165		0.136825		1.02717	0.594588	0.662234
B9GDE5	9.70577	11.5227	11.8506	13.1661	15.868	11.5613	3	3	6			1.02165	2.45779	2.93769	3.82466	5.96771	2.87419		3.18062						2.1352	5.12987	6.11487	8.02536	12.0427	5.79944			2.1352	5.12987	6.11487	8.02536	12.0427	5.79944		0.60051		4.1625	2.95079	0.129337
Q9SB89	12.4191	11.5086	11.3487	10.9196	11.8207	11.5591	3	3	6			3.73497	2.4437	2.4358	1.57817	1.92043	2.87204		2.49752						7.80594	5.10046	5.07018	3.31151	3.87537	5.7951			7.80594	5.10046	5.07018	3.31151	3.87537	5.7951		0.814491		-1.66487	2.11757	0.230434
Q8W250	8.3756	9.66965	12.6994	12.4165	9.01346	11.5529	3	3	6			-0.308519	0.60476	3.78648	3.0751	-0.886803	2.86577		1.5228						-0.644793	1.26225	7.88163	6.45253	-1.78954	5.78244			-0.644793	1.26225	7.88163	6.45253	-1.78954	5.78244		0.977375		0.648783	0.202272	0.869181
Q0JCT1	12.9195	12.8124	12.058	13.3764	13.249	11.5461	3	3	6			4.23534	3.74755	3.1451	4.03496	3.34877	2.85903		3.56179						8.85169	7.82184	6.5466	8.46663	6.75772	5.76884			8.85169	7.82184	6.5466	8.46663	6.75772	5.76884		0.834379		-0.742312	0.96633	0.511806
Q6YT73	12.7734	10.2051	13.2094	14.4832	13.3392	11.5436	3	3	6			4.0893	1.14017	4.29651	5.14181	3.43889	2.85652		3.49387						8.54649	2.37976	8.94329	10.7892	6.93957	5.76377			8.54649	2.37976	8.94329	10.7892	6.93957	5.76377		0.675613		1.20766	0.582603	0.667758
Q109B0	12.0534	11.3595	12.071	9.15515	9.89827	11.5419	3	3	6			3.36929	2.29459	3.15807	-0.18629	-0.00199618	2.85483		1.91475						7.04169	4.78924	6.57359	-0.390896	-0.00402822	5.76036			7.04169	4.78924	6.57359	-0.390896	-0.00402822	5.76036		0.212733		-4.34636	3.21408	0.107762
Q64MA3	6.99797	10.8993	9.60931	7.75208	11.2149	11.5414	3	3	6			-1.68615	1.83439	0.696385	-1.58936	1.31466	2.85429		0.570704						-3.524	3.82873	1.44954	-3.33498	2.65294	5.75928			-3.524	3.82873	1.44954	-3.33498	2.65294	5.75928		0.794276		1.10766	0.389481	0.763404
Q67VC8	10.6101	9.12363	10.1721	12.7379	11.7031	11.5329	3	3	6			1.92598	0.0587429	1.25913	3.39646	1.80286	2.84585		1.8815						4.02522	0.122607	2.6209	7.12687	3.63811	5.74224			4.02522	0.122607	2.6209	7.12687	3.63811	5.74224		0.882554		3.24616	3.31264	0.100646
A3AVP1	10.956	9.37821	10.4306	13.7223	13.739	11.528	3	3	6			2.27189	0.313321	1.51763	4.38084	3.83878	2.84092		2.52723						4.74816	0.65396	3.15899	9.19239	7.74653	5.7323			4.74816	0.65396	3.15899	9.19239	7.74653	5.7323		0.829607		4.70337	4.6732	0.0391947
Q0DK10	11.3408	10.7596	9.8807	6.79727	9.10082	11.5243	3	3	6			2.65667	1.69467	0.967777	-2.54416	-0.799445	2.8372		0.802119						5.55234	3.53709	2.01445	-5.33847	-1.61325	5.7248			5.55234	3.53709	2.01445	-5.33847	-1.61325	5.7248		0.180812		-4.11027	1.7651	0.294206
Q652L2	11.8654	10.7215	8.85109	11.436	11.657	11.5214	3	3	6			3.1813	1.65664	-0.0618303	2.09455	1.7567	2.83426		1.91027						6.6488	3.45772	-0.128701	4.39503	3.54496	5.71887			6.6488	3.45772	-0.128701	4.39503	3.54496	5.71887		0.189051		1.22701	0.778431	0.583001
Q2KNB9	11.0634	10.4362	10.8103	11.0364	11.6256	11.5205	3	3	6			2.37927	1.3713	1.89741	1.69494	1.72535	2.83343		1.98362						4.97259	2.86217	3.94949	3.55653	3.48171	5.71718			4.97259	2.86217	3.94949	3.55653	3.48171	5.71718		0.817264		0.323723	0.412683	0.751225
Q0J4D4	11.6772	12.1283	11.6089	12.4635	13.0421	11.5132	3	3	6			2.99311	3.06337	2.69598	3.12209	3.14179	2.82614		2.97374						6.25549	6.39382	5.61174	6.55114	6.34003	5.70248			6.25549	6.39382	5.61174	6.55114	6.34003	5.70248		0.943133		0.110866	0.381109	0.767847
Q9LDY8	7.2636	8.91767	8.81272	9.82187	9.46107	11.5089	3	3	6			-1.42053	-0.147217	-0.100201	0.480432	-0.439195	2.82184		0.199189						-2.96884	-0.307269	-0.20857	1.0081	-0.886281	5.6938			-2.96884	-0.307269	-0.20857	1.0081	-0.886281	5.6938		0.352172		3.1001	2.16113	0.223581
Q7FAD5	11.6204	12.0414	10.0688	11.3595	10.7835	11.508	3	3	6			2.93633	2.97653	1.15585	2.01809	0.883224	2.82095		2.13183						6.13681	6.21258	2.40594	4.2346	1.78232	5.692			6.13681	6.21258	2.40594	4.2346	1.78232	5.692		0.903695		-1.01547	0.781345	0.581824
F4IV99	10.3915	11.7481	10.5612	10.6197	12.6556	11.5059	3	3	6			1.70734	2.68318	1.64827	1.27823	2.75529	2.81877		2.14851						3.56827	5.6003	3.43091	2.68214	5.56008	5.6876			3.56827	5.6003	3.43091	2.68214	5.56008	5.6876		0.676265		0.443451	0.45057	0.731754
Q0JPA6	9.16754	8.30401	11.2705	13.6309	14.346	11.505	3	3	6			0.48342	-0.760878	2.35755	4.28951	4.44569	2.81792		2.2722						1.01033	-1.5881	4.90728	9.00077	8.97127	5.6859			1.01033	-1.5881	4.90728	9.00077	8.97127	5.6859		0.507104		6.44281	4.57321	0.0420076
Q6ESG1	8.53056	9.04303	8.76454	9.07039	9.43177	11.4934	3	3	6			-0.153561	-0.0218598	-0.148384	-0.271048	-0.468496	2.80631		0.290494						-0.320936	-0.0456256	-0.308864	-0.568745	-0.945409	5.66247			-0.320936	-0.0456256	-0.308864	-0.568745	-0.945409	5.66247		0.003509		1.60791	0.912281	0.531344
Q851V5	12.7257	12.2066	11.5446	13.2491	13.5157	11.4925	3	3	6			4.04154	3.14173	2.6317	3.90765	3.61543	2.80541		3.35724						8.44667	6.55738	5.47795	8.19949	7.29583	5.66065			8.44667	6.55738	5.47795	8.19949	7.29583	5.66065		0.846203		0.224659	0.228263	0.853662
Q588V7	10.785	10.7909	13.1128	12.2781	13.14	11.4925	3	3	6			2.10084	1.72603	4.19991	2.93663	3.23973	2.80541		2.83476						4.39067	3.60255	8.74219	6.162	6.53768	5.66065			4.39067	3.60255	8.74219	6.162	6.53768	5.66065		0.0492913		0.541636	0.380217	0.768322
Q0J716	10.8763	11.0522	10.389	12.3925	13.0128	11.4924	3	3	6			2.19216	1.98727	1.47606	3.05101	3.11255	2.80531		2.4374						4.58154	4.14781	3.07246	6.402	6.28103	5.66045			4.58154	4.14781	3.07246	6.402	6.28103	5.66045		0.415468		2.18056	6.33583	0.0123801
Q40665	11.4629	12.702	9.376	12.0091	12.5542	11.4867	3	3	6			2.77874	3.63713	0.463072	2.66766	2.65396	2.79964		2.50003						5.80745	7.59138	0.963893	5.5976	5.35561	5.64901			5.80745	7.59138	0.963893	5.5976	5.35561	5.64901		0.00416554		0.746496	0.429498	0.74252
Q6ATJ8	8.40875	10.2826	7.44997	10.6793	10.6294	11.4864	3	3	6			-0.275369	1.21774	-1.46295	1.33787	0.729183	2.79929		0.724293						-0.575511	2.54165	-3.04516	2.80727	1.47147	5.6483			-0.575511	2.54165	-3.04516	2.80727	1.47147	5.6483		0.734609		3.66869	2.78261	0.145329
Q7X745	8.16586	9.15203	10.9638	9.95691	10.5638	11.4817	3	3	6			-0.518262	0.0871442	2.05084	0.615476	0.663503	2.7946		0.948884						-1.08315	0.181886	4.26887	1.29147	1.33893	5.63885			-1.08315	0.181886	4.26887	1.29147	1.33893	5.63885		0.88669		1.63388	1.0222	0.492365
Q6AVI8	7.40693	10.7199	7.23907	9.79588	10.1364	11.4746	3	3	6			-1.2772	1.65502	-1.67385	0.45444	0.236085	2.78752		0.36367						-2.66929	3.45433	-3.48415	0.953561	0.476413	5.62456			-2.66929	3.45433	-3.48415	0.953561	0.476413	5.62456		0.720025		3.25122	1.73401	0.300616
Q5NTH4	9.23221	8.86304	9.63688	4.93409	7.28012	11.4686	3	3	6			0.548082	-0.201847	0.723955	-4.40735	-2.62014	2.78153		-0.529295						1.14547	-0.421292	1.50693	-9.24802	-5.28737	5.61247			1.14547	-0.421292	1.50693	-9.24802	-5.28737	5.61247		0.0348611		-3.71801	1.02482	0.491472
Q0INC5	11.8087	11.1569	10.8953	10.5538	12.3563	11.4595	3	3	6			3.1246	2.09202	1.98235	1.21238	2.45608	2.77239		2.2733						6.53029	4.36643	4.1263	2.54397	4.95628	5.59402			6.53029	4.36643	4.1263	2.54397	4.95628	5.59402		0.807675		-0.642918	0.686509	0.621355
Q0IQB6	10.8004	8.32549	6.60023	11.0765	11.2348	11.4421	3	3	6			2.11629	-0.739402	-2.3127	1.73511	1.33449	2.75497		0.814794						4.42297	-1.54327	-4.81393	3.64082	2.69296	5.55887			4.42297	-1.54327	-4.81393	3.64082	2.69296	5.55887		0.177152		4.60896	2.48183	0.179017
Q7XLC6	9.67343	9.65338	9.65349	9.39588	10.1276	11.4386	3	3	6			0.989309	0.588495	0.740567	0.0544396	0.227342	2.75154		0.891949						2.06762	1.2283	1.5415	0.114232	0.45877	5.55196			2.06762	1.2283	1.5415	0.114232	0.45877	5.55196		0.0380672		0.429178	0.267566	0.83072
Q2QZ86	4.60259	6.77175	10.1179	10.6032	9.95555	11.4318	3	3	6			-4.08154	-2.29313	1.20498	1.26173	0.0552832	2.74466		-0.184669						-8.53025	-4.7862	2.50819	2.6475	0.11156	5.53808			-8.53025	-4.7862	2.50819	2.6475	0.11156	5.53808		0.379188		6.36847	2.72136	0.151631
Q9LXW7	10.8912	11.3404	11.2371	11.4562	10.6507	11.4284	3	3	6			2.20705	2.27546	2.32417	2.11476	0.750428	2.74127		2.06886						4.61266	4.74932	4.8378	4.43745	1.51434	5.53122			4.61266	4.74932	4.8378	4.43745	1.51434	5.53122		0.00594889		-0.905589	0.918542	0.529043
Q5JKN2	10.6321	9.08398	9.96795	13.0294	13.393	11.419	3	3	6			1.94796	0.0190974	1.05502	3.68799	3.49272	2.73187		2.15578						4.07117	0.0398599	2.19605	7.73858	7.0482	5.51226			4.07117	0.0398599	2.19605	7.73858	7.0482	5.51226		0.483857		4.66398	5.31044	0.0251999
Q6I576	8.93077	11.7289	11.5496	10.9761	11.515	11.4146	3	3	6			0.246644	2.66405	2.63667	1.63463	1.6147	2.72754		1.9207						0.515476	5.56038	5.48828	3.42997	3.2584	5.50352			0.515476	5.56038	5.48828	3.42997	3.2584	5.50352		0.314657		0.209252	0.129801	0.913957
Q8H6G9	10.788	8.24079	10.4707	11.1775	10.6141	11.4089	3	3	6			2.10386	-0.824096	1.55774	1.83611	0.713801	2.72177		1.35153						4.39699	-1.72004	3.24246	3.85274	1.44043	5.49188			4.39699	-1.72004	3.24246	3.85274	1.44043	5.49188		0.56446		1.62188	0.986814	0.504591
Q6ENJ1	12.6731	12.0335	12.1088	12.2377	13.7002	11.4069	3	3	6			3.98894	2.9686	3.19586	2.89625	3.79996	2.71986		3.26158						8.33674	6.19604	6.65225	6.07726	7.66819	5.48802			8.33674	6.19604	6.65225	6.07726	7.66819	5.48802		0.999791		-0.650519	0.94662	0.518847
B8B0E2	9.40569	10.7251	10.1456	11.0745	12.3904	11.4067	3	3	6			0.721571	1.66022	1.23263	1.73304	2.49015	2.71959		1.75953						1.50806	3.4652	2.56574	3.63647	5.02503	5.48748			1.50806	3.4652	2.56574	3.63647	5.02503	5.48748		0.983235		2.20333	4.32364	0.0499405
B9FFA3	11.6402	11.252	12.3676	9.2832	11.6065	11.4053	3	3	6			2.95603	2.18713	3.45471	-0.0582331	1.70628	2.71821		2.16069						6.17799	4.56495	7.19105	-0.122192	3.44322	5.4847			6.17799	4.56495	7.19105	-0.122192	3.44322	5.4847		0.357728		-3.04276	2.57621	0.167681
Q6ENE1	8.08114	11.7734	11.4462	11.1327	9.36354	11.4008	3	3	6			-0.602986	2.7085	2.53328	1.79126	-0.536722	2.71373		1.43451						-1.26022	5.65315	5.27308	3.75863	-1.08309	5.47567			-1.26022	5.65315	5.27308	3.75863	-1.08309	5.47567		0.867429		-0.504934	0.194715	0.873745
F7J0M6	12.2623	6.6865	12.303	11.0519	11.8399	11.3971	3	3	6			3.57818	-2.37839	3.39006	1.71045	1.93961	2.70999		1.82498						7.47825	-4.96414	7.05648	3.58907	3.91407	5.46812			7.47825	-4.96414	7.05648	3.58907	3.91407	5.46812		0.0396123		1.13356	0.307326	0.808138
Q84ZD2	7.94416	8.84018	8.02042	9.05004	10.1301	11.3964	3	3	6			-0.739968	-0.224707	-0.892499	-0.291398	0.229791	2.70935		0.131761						-1.5465	-0.469006	-1.85776	-0.611446	0.46371	5.46682			-1.5465	-0.469006	-1.85776	-0.611446	0.46371	5.46682		0.0960963		3.06412	2.42934	0.18565
Q7G768	10.1342	8.58109	11.028	12.9204	12.8252	11.3948	3	3	6			1.45005	-0.4838	2.11512	3.57901	2.92497	2.70774		2.04885						3.03054	-1.00978	4.40267	7.5099	5.9025	5.46358			3.03054	-1.00978	4.40267	7.5099	5.9025	5.46358		0.255716		4.15085	3.72784	0.0754758
P31924	13.0588	13.4473	11.5449	13.3225	13.3153	11.3863	3	3	6			4.37465	4.38245	2.63199	3.98105	3.41503	2.69925		3.58074						9.14284	9.14701	5.47855	8.35352	6.89141	5.44645			9.14284	9.14701	5.47855	8.35352	6.89141	5.44645		0.640864		-1.02567	0.92386	0.527097
Q0J0H4	6.61313	2.88514	8.1373	8.35196	8.65592	11.3863	3	3	6			-2.07099	-6.17974	-0.775625	-0.989482	-1.24434	2.6992		-1.42683						-4.32829	-12.8983	-1.61448	-2.07625	-2.51104	5.44634			-4.32829	-12.8983	-1.61448	-2.07625	-2.51104	5.44634		0.731789		6.5667	2.32971	0.198924
Q7G794	8.54203	9.83678	10.1514	10.8738	8.10392	11.3858	3	3	6			-0.142097	0.771889	1.23847	1.53231	-1.79635	2.69866		0.717149						-0.296978	1.61108	2.57791	3.21529	-3.62497	5.44526			-0.296978	1.61108	2.57791	3.21529	-3.62497	5.44526		0.174853		0.381187	0.151546	0.900285
Q8H016	9.96303	9.68963	10.9817	8.44898	10.8878	11.3794	3	3	6			1.2789	0.624744	2.06879	-0.892454	0.987565	2.69228		1.12664						2.67286	1.30396	4.30622	-1.87265	1.99287	5.43239			2.67286	1.30396	4.30622	-1.87265	1.99287	5.43239		0.289361		-0.910143	0.493447	0.710326
Q5WA76	7.68075	9.76873	8.78447	12.8307	9.89168	11.379	3	3	6			-1.00338	0.703843	-0.128452	3.48926	-0.00858761	2.69191		0.957431						-2.09702	1.46905	-0.267376	7.32157	-0.0173295	5.43162			-2.09702	1.46905	-0.267376	7.32157	-0.0173295	5.43162		0.359308		4.54374	2.89179	0.134736
Q67W65	10.1038	12.1983	11.4165	10.8512	12.6047	11.3789	3	3	6			1.41969	3.13337	2.50361	1.50977	2.70445	2.6918		2.32711						2.9671	6.53994	5.21132	3.16797	5.45749	5.43141			2.9671	6.53994	5.21132	3.16797	5.45749	5.43141		0.692603		-0.220495	0.196714	0.872535
P0DKK0	11.4277	9.26931	9.81473	10.2893	11.6739	11.3789	3	3	6			2.74356	0.204427	0.901803	0.94789	1.77366	2.6918		1.54386						5.73393	0.426677	1.87712	1.98898	3.57919	5.43141			5.73393	0.426677	1.87712	1.98898	3.57919	5.43141		0.565791		0.987283	0.676942	0.62549
Q64M78	9.87497	11.6516	9.76967	10.9424	10.9612	11.3736	3	3	6			1.19084	2.5867	0.856749	1.601	1.06097	2.68653		1.6638						2.48882	5.39893	1.78334	3.35942	2.141	5.42078			2.48882	5.39893	1.78334	3.35942	2.141	5.42078		0.856001		0.416703	0.340216	0.789923
Q5VRY0	10.8058	10.3792	11.4501	11.3447	11.2965	11.3677	3	3	6			2.1217	1.31427	2.53721	2.00325	1.39625	2.68059		2.00888						4.43427	2.74314	5.28125	4.20345	2.81759	5.4088			4.43427	2.74314	5.28125	4.20345	2.81759	5.4088		0.996589		-0.00960625	0.00986796	0.993183
F4JHN2	9.3522	9.46252	8.14919	7.70639	9.99294	11.3622	3	3	6			0.668075	0.397636	-0.763735	-1.63504	0.0926733	2.67512		0.239121						1.39625	0.82994	-1.58973	-3.43085	0.187012	5.39776			1.39625	0.82994	-1.58973	-3.43085	0.187012	5.39776		0.22647		0.505823	0.214949	0.861577
Q942L2	4.73601	11.2206	7.35403	8.62888	11.4216	11.3562	3	3	6			-3.94811	2.15567	-1.55889	-0.712554	1.52138	2.66908		0.0210953						-8.25141	4.49929	-3.24487	-1.49517	3.07009	5.38557			-8.25141	4.49929	-3.24487	-1.49517	3.07009	5.38557		0.458005		4.6525	1.58845	0.332529
Q5Z6G5	9.50948	9.68062	11.8238	11.7876	10.9932	11.3553	3	3	6			0.825355	0.615736	2.91092	2.44618	1.09289	2.6682		1.75988						1.72496	1.28516	6.05914	5.13287	2.20541	5.3838			1.72496	1.28516	6.05914	5.13287	2.20541	5.3838		0.619296		1.2176	0.881141	0.542938
Q0E2L3	12.5036	10.7759	11.802	13.7963	14.6694	11.3552	3	3	6			3.81945	1.71105	2.88907	4.45491	4.76917	2.66809		3.38529						7.98251	3.57129	6.01366	9.34782	9.62404	5.38358			7.98251	3.57129	6.01366	9.34782	9.62404	5.38358		0.92909		2.26266	1.76941	0.293328
P41095	10.9648	12.2208	9.06617	10.9454	11.6375	11.3537	3	3	6			2.28065	3.15591	0.153246	1.60401	1.73722	2.6666		1.93294						4.76647	6.58699	0.318986	3.36572	3.50565	5.38057			4.76647	6.58699	0.318986	3.36572	3.50565	5.38057		0.217059		0.193167	0.109874	0.926669
P49216	9.17605	11.267	11.1238	11.0827	12.384	11.3487	3	3	6			0.491925	2.20213	2.21087	1.74131	2.48371	2.66158		1.96526						1.0281	4.59627	4.60198	3.65383	5.01204	5.37043			1.0281	4.59627	4.60198	3.65383	5.01204	5.37043		0.323421		1.26998	1.38097	0.383959
P53683	9.18856	11.4556	9.47551	7.82126	8.20677	11.3418	3	3	6			0.504441	2.39075	0.562587	-1.52017	-1.69349	2.6547		0.483135						1.05426	4.98994	1.17104	-3.18981	-3.41742	5.35656			1.05426	4.98994	1.17104	-3.18981	-3.41742	5.35656		0.334002		-2.82197	1.24191	0.422811
Q6ZBZ2	11.5106	11.3814	12.0653	11.7456	13.6767	11.3364	3	3	6			2.82644	2.31655	3.15243	2.4042	3.77646	2.6493		2.85423						5.90716	4.83507	6.56184	5.04477	7.62078	5.34566			5.90716	4.83507	6.56184	5.04477	7.62078	5.34566		0.55396		0.235714	0.290806	0.817445
Q6H7U3	11.0679	8.35966	10.361	12.2819	10.4207	11.3337	3	3	6			2.38378	-0.705225	1.44803	2.94043	0.520432	2.64662		1.53901						4.98201	-1.47194	3.01411	6.16997	1.05022	5.34025			4.98201	-1.47194	3.01411	6.16997	1.05022	5.34025		0.816629		2.01208	1.11041	0.463161
B9G5Y5	8.6793	7.13566	9.45018	11.0169	11.3233	11.33	3	3	6			-0.00481911	-1.92923	0.537257	1.67551	1.42307	2.64293		0.724119						-0.0100718	-4.02666	1.11831	3.51576	2.87171	5.3328			-0.0100718	-4.02666	1.11831	3.51576	2.87171	5.3328		0.364336		4.87956	4.39534	0.0475192
Q2R2B4	10.9496	14.1061	11.5762	10.003	11.789	11.3204	3	3	6			2.26548	5.04119	2.66328	0.661518	1.88878	2.63331		2.52559						4.73478	10.5219	5.54367	1.38808	3.8115	5.3134			4.73478	10.5219	5.54367	1.38808	3.8115	5.3134		0.570833		-3.42912	2.43912	0.184396
B9FAF3	9.62832	9.68951	10.1904	11.3402	10.511	11.3117	3	3	6			0.944195	0.624622	1.27752	1.9988	0.610697	2.62465		1.34675						1.97333	1.3037	2.65918	4.19413	1.23237	5.29593			1.97333	1.3037	2.65918	4.19413	1.23237	5.29593		0.188423		1.5954	1.84183	0.278967
B9F7C8	11.2772	12.3985	12.5408	12.1384	12.8903	11.3081	3	3	6			2.59305	3.33359	3.62791	2.79696	2.99002	2.62096		2.99375						5.41937	6.95783	7.55156	5.86892	6.03376	5.28848			5.41937	6.95783	7.55156	5.86892	6.03376	5.28848		0.224684		-0.912536	2.01506	0.247404
Q9LUW5	10.8274	11.3209	11.5775	11.225	11.4976	11.3029	3	3	6			2.1433	2.25597	2.6646	1.88359	1.59734	2.61577		2.19343						4.47941	4.70863	5.54642	3.95237	3.22337	5.27801			4.47941	4.70863	5.54642	3.95237	3.22337	5.27801		0.450527		-0.760237	1.6073	0.328212
Q8L6H7	10.2057	9.0036	9.33548	8.32481	11.5519	11.2916	3	3	6			1.52155	-0.0612849	0.422556	-1.01663	1.65164	2.60454		0.853728						3.17998	-0.127913	0.87956	-2.13321	3.33295	5.25534			3.17998	-0.127913	0.87956	-2.13321	3.33295	5.25534		0.327263		0.841151	0.423388	0.745671
Q5W770	7.67709	8.0555	8.4665	6.40961	10.5852	11.2853	3	3	6			-1.00704	-1.00939	-0.446419	-2.93183	0.684885	2.59825		-0.351922						-2.10467	-2.10678	-0.92923	-6.15191	1.38208	5.24265			-2.10467	-2.10678	-0.92923	-6.15191	1.38208	5.24265		0.0271044		1.87117	0.659479	0.633107
Q9M0F8	9.91828	10.1852	7.24375	7.45738	7.30688	11.2784	3	3	6			1.23416	1.12036	-1.66918	-1.88406	-2.59338	2.59136		-0.200124						2.57934	2.3384	-3.47443	-3.95335	-5.23336	5.22874			2.57934	2.3384	-3.47443	-3.95335	-5.23336	5.22874		0.530239		-1.80043	0.591054	0.663858
Q5Z9S8	11.2364	10.2364	10.6298	10.7949	12.9288	11.2771	3	3	6			2.55225	1.17149	1.71689	1.45347	3.02853	2.58996		2.08543						5.3341	2.44511	3.57374	3.04984	6.11148	5.22593			5.3341	2.44511	3.57374	3.04984	6.11148	5.22593		0.921258		1.01143	1.12033	0.459987
Q6ESI7	11.2507	10.6831	9.52264	9.89738	10.0395	11.2737	3	3	6			2.56659	1.6182	0.609717	0.555939	0.139202	2.58664		1.34605						5.36407	3.37748	1.26914	1.16654	0.280906	5.21923			5.36407	3.37748	1.26914	1.16654	0.280906	5.21923		0.753796		-1.11467	0.752086	0.593744
Q8H274	9.4172	6.35256	9.29806	5.97602	10.2884	11.2703	3	3	6			0.733075	-2.71232	0.385139	-3.36542	0.38814	2.5832		-0.331364						1.5321	-5.66113	0.801675	-7.06172	0.783253	5.21229			1.5321	-5.66113	0.801675	-7.06172	0.783253	5.21229		0.577213		0.753724	0.204232	0.868
Q6Z3Y6	8.63684	8.08438	10.7891	8.99178	12.6183	11.2698	3	3	6			-0.0472812	-0.980504	1.8762	-0.34966	2.71803	2.58268		0.966577						-0.0988158	-2.0465	3.90536	-0.733699	5.48489	5.21123			-0.0988158	-2.0465	3.90536	-0.733699	5.48489	5.21123		0.854363		2.73413	1.45241	0.365411
Q0DJS1	11.2026	11.4321	10.836	12.3077	11.2304	11.2676	3	3	6			2.51843	2.36718	1.92305	2.96625	1.33012	2.58051		2.28092						5.26342	4.94076	4.00286	6.22413	2.68413	5.20686			5.26342	4.94076	4.00286	6.22413	2.68413	5.20686		0.228655		-0.0306401	0.0299551	0.979451
Q2QRV3	9.4941	10.4801	8.83485	12.1462	12.3085	11.2675	3	3	6			0.809972	1.4152	-0.0780732	2.80475	2.40822	2.58039		1.65674						1.69281	2.95378	-0.162511	5.88526	4.8597	5.20662			1.69281	2.95378	-0.162511	5.88526	4.8597	5.20662		0.199396		3.8225	5.96314	0.0160294
Q84YK8	8.74641	11.0892	10.4354	11.439	11.1863	11.2658	3	3	6			0.0622903	2.0243	1.52243	2.09756	1.28603	2.5787		1.59522						0.130184	4.22509	3.16898	4.40136	2.59518	5.2032			0.130184	4.22509	3.16898	4.40136	2.59518	5.2032		0.566135		1.55849	1.54434	0.342853
Q6K431	10.9088	9.30873	9.76437	11.1378	11.7969	11.2616	3	3	6			2.22472	0.243839	0.851451	1.79632	1.89663	2.57447		1.5979						4.64958	0.508937	1.77231	3.76926	3.82733	5.19467			4.64958	0.508937	1.77231	3.76926	3.82733	5.19467		0.252538		1.95348	2.24892	0.210381
A0A0P0XBU0	11.0996	10.2595	9.06129	9.50253	10.6203	11.2609	3	3	6			2.41549	1.19462	0.148367	0.161096	0.720046	2.57383		1.20224						5.04828	2.4934	0.308828	0.338031	1.45303	5.19337			5.04828	2.4934	0.308828	0.338031	1.45303	5.19337		0.930473		-0.288691	0.163868	0.892629
P35685	8.91624	11.8028	9.02542	10.201	11.6048	11.2578	3	3	6			0.232115	2.73791	0.112493	0.859584	1.70457	2.57071		1.36956						0.48511	5.71454	0.234157	1.80368	3.43976	5.18707			0.48511	5.71454	0.234157	1.80368	3.43976	5.18707		0.460381		1.33224	0.866114	0.548623
Q01859	11.6956	12.6829	11.2221	11.6123	13.5084	11.2498	3	3	6			3.01145	3.61798	2.30921	2.27088	3.60815	2.56267		2.89672						6.29382	7.5514	4.80666	4.76503	7.28113	5.17086			6.29382	7.5514	4.80666	4.76503	7.28113	5.17086		0.98303		-0.478288	0.536618	0.689385
Q9LK10	12.6705	10.2093	10.9426	11.3012	12.35	11.2417	3	3	6			3.98638	1.14444	2.02966	1.95977	2.44973	2.55465		2.35411						8.33138	2.38867	4.22479	4.11223	4.94349	5.15468			8.33138	2.38867	4.22479	4.11223	4.94349	5.15468		0.0635237		-0.244815	0.155925	0.897557
Q9FVV4	11.9084	9.63775	11.9523	11.828	12.8299	11.2414	3	3	6			3.22431	0.572861	3.03942	2.48654	2.92966	2.55429		2.46785						6.73868	1.19567	6.32661	5.21756	5.91195	5.15396			6.73868	1.19567	6.32661	5.21756	5.91195	5.15396		0.0364016		0.674169	0.429017	0.742768
Q9S775	10.1237	11.4781	10.5963	11.2244	11.3066	11.2382	3	3	6			1.43961	2.41317	1.68336	1.88293	1.40631	2.55113		1.89609						3.00873	5.03675	3.50395	3.95098	2.83789	5.14758			3.00873	5.03675	3.50395	3.95098	2.83789	5.14758		0.911785		0.129006	0.162567	0.893434
A3AWH5	9.75771	9.65549	11.2331	10.264	9.42394	11.2303	3	3	6			1.07358	0.590608	2.32016	0.922536	-0.47633	2.54323		1.1623						2.24375	1.23271	4.82946	1.93578	-0.961218	5.13163			2.24375	1.23271	4.82946	1.93578	-0.961218	5.13163		0.540624		-0.733243	0.434707	0.739844
Q65XG6	7.58105	9.34132	9.45574	8.97539	8.84122	11.2268	3	3	6			-1.10307	0.276432	0.542815	-0.366048	-1.05905	2.53968		0.13846						-2.30538	0.576965	1.12988	-0.768085	-2.13712	5.12447			-2.30538	0.576965	1.12988	-0.768085	-2.13712	5.12447		0.372049		0.939266	0.467958	0.722987
A1A697	11.9494	11.5339	12.8792	8.94705	10.9542	11.2263	3	3	6			3.26527	2.46903	3.96632	-0.394385	1.05393	2.5392		2.14989						6.82428	5.15332	8.25597	-0.827545	2.1268	5.1235			6.82428	5.15332	8.25597	-0.827545	2.1268	5.1235		0.428108		-4.60361	3.71128	0.0763471
Q851S7	11.4135	12.0369	10.9355	12.5651	10.5212	11.2233	3	3	6			2.72935	2.97204	2.02261	3.22371	0.620943	2.53618		2.35081						5.70423	6.20321	4.21011	6.76438	1.25304	5.11742			5.70423	6.20321	4.21011	6.76438	1.25304	5.11742		0.236949		-0.994236	0.741226	0.598231
Q6K1U0	6.41924	9.55693	11.4192	7.09751	9.84897	11.2181	3	3	6			-2.26489	0.49204	2.50625	-2.24393	-0.0512979	2.53105		0.161536						-4.73353	1.02698	5.21681	-4.70849	-0.103517	5.10705			-4.73353	1.02698	5.21681	-4.70849	-0.103517	5.10705		0.98286		-0.405071	0.112409	0.925042
Q5JNA1	8.57107	11.2773	11.3406	10.4254	11.3399	11.2104	3	3	6			-0.113053	2.21246	2.42771	1.08399	1.43958	2.52333		1.59567						-0.236277	4.61782	5.05332	2.27455	2.90504	5.09149			-0.236277	4.61782	5.05332	2.27455	2.90504	5.09149		0.404448		0.278739	0.167557	0.890349
F4J9M5	11.5431	10.4921	9.4583	9.8289	12.7248	11.2102	3	3	6			2.85901	1.42717	0.545381	0.487461	2.82457	2.52315		1.77779						5.97521	2.97876	1.13522	1.02285	5.69989	5.09112			5.97521	2.97876	1.13522	1.02285	5.69989	5.09112		0.959875		0.574886	0.33706	0.791653
Q65X23	8.49973	10.0189	11.3061	12.5313	11.2846	11.209	3	3	6			-0.184397	0.954009	2.3932	3.18987	1.38433	2.52187		1.70981						-0.385383	1.99119	4.98149	6.69337	2.79353	5.08854			-0.385383	1.99119	4.98149	6.69337	2.79353	5.08854		0.693851		2.66271	2.07075	0.238036
Q6Z2X3	10.7266	10.6375	10.9393	11.3679	11.2589	11.2074	3	3	6			2.04252	1.57264	2.02636	2.02641	1.3586	2.52035		1.92448						4.26879	3.2824	4.21792	4.25206	2.7416	5.08546			4.26879	3.2824	4.21792	4.25206	2.7416	5.08546		0.358653		0.10334	0.155151	0.898038
Q5W7C6	10.1016	11.8814	12.3143	9.89586	11.8655	11.2028	3	3	6			1.41746	2.81649	3.40135	0.554426	1.9652	2.5157		2.11177						2.96243	5.87855	7.07998	1.16336	3.9657	5.07609			2.96243	5.87855	7.07998	1.16336	3.9657	5.07609		0.951151		-1.90527	1.63413	0.322165
Q7X7X4	10.2175	9.42202	9.52282	7.34047	9.38647	11.1994	3	3	6			1.53335	0.357136	0.609893	-2.00096	-0.513799	2.51233		0.416325						3.20464	0.745409	1.26951	-4.19866	-1.03683	5.06929			3.20464	0.745409	1.26951	-4.19866	-1.03683	5.06929		0.140561		-1.79525	0.83878	0.559116
Q6Z836	9.58873	9.10494	10.0773	6.58615	9.87506	11.1972	3	3	6			0.90461	0.0400523	1.16443	-2.75529	-0.0252068	2.51006		0.306443						1.8906	0.0835967	2.42378	-5.78147	-0.0508666	5.06471			1.8906	0.0835967	2.42378	-5.78147	-0.0508666	5.06471		0.0972237		-1.72187	0.688958	0.620302
Q68Y49	13.9219	7.71672	11.3597	11.7636	9.39879	11.1965	3	3	6			5.23781	-1.34817	2.44683	2.42215	-0.501479	2.50939		1.79442						10.9468	-2.81389	5.09312	5.08244	-1.01197	5.06334			10.9468	-2.81389	5.09312	5.08244	-1.01197	5.06334		0.411175		-1.36408	0.366571	0.775624
Q67WN8	8.40523	8.13694	10.1909	10.4809	13.0074	11.194	3	3	6			-0.278897	-0.927947	1.27801	1.13945	3.10718	2.50692		1.13745						-0.582883	-1.9368	2.66021	2.39094	6.27019	5.05838			-0.582883	-1.9368	2.66021	2.39094	6.27019	5.05838		0.827527		4.52633	3.96775	0.0639129
Q8H8N3	8.38262	7.3936	10.1458	11.2774	11.5066	11.1911	3	3	6			-0.301499	-1.67128	1.23288	1.93597	1.60634	2.50403		0.884406						-0.630122	-3.48828	2.56627	4.06228	3.24154	5.05253			-0.630122	-3.48828	2.56627	4.06228	3.24154	5.05253		0.164525		4.63616	3.96592	0.063994
A0A0P0XCU3	10.4902	10.0308	9.93761	11.5444	11.7032	11.1874	3	3	6			1.80613	0.965918	1.02469	2.203	1.80295	2.50032		1.71717						3.77473	2.01605	2.13291	4.62259	3.63829	5.04505			3.77473	2.01605	2.13291	4.62259	3.63829	5.04505		0.700297		1.79408	3.97746	0.0634839
Q5JMF3	9.99294	12.0242	9.91867	10.7681	11.3244	11.1871	3	3	6			1.30882	2.95928	1.00575	1.42666	1.42414	2.50001		1.77078						2.73537	6.17658	2.09348	2.9936	2.87387	5.04443			2.73537	6.17658	2.09348	2.9936	2.87387	5.04443		0.471856		-0.0311801	0.0234509	0.983877
Q0J0S6	9.83137	8.42501	9.78242	12.0723	12.147	11.186	3	3	6			1.14725	-0.639881	0.869501	2.73086	2.24678	2.4989		1.47557						2.3977	-1.33555	1.80989	5.73022	4.53393	5.04218			2.3977	-1.33555	1.80989	5.73022	4.53393	5.04218		0.164228		4.14477	5.23112	0.0266242
Q1WNZ7	9.99746	7.64479	10.2295	6.78882	11.7404	11.1795	3	3	6			1.31334	-1.42009	1.31662	-2.55262	1.84015	2.49238		0.498295						2.74483	-2.964	2.74056	-5.35621	3.71336	5.02903			2.74483	-2.964	2.74056	-5.35621	3.71336	5.02903		0.506921		0.288262	0.0848992	0.94285
Q6EN45	11.3053	9.41077	9.82676	11.0898	14.0328	11.1783	3	3	6			2.62114	0.345882	0.913832	1.74834	4.13256	2.4912		2.04216						5.47808	0.721921	1.90216	3.66858	8.33936	5.02664			5.47808	0.721921	1.90216	3.66858	8.33936	5.02664		0.96967		2.97748	2.25615	0.20933
F4JAA5	10.929	10.8467	8.61305	11.0095	11.1554	11.1716	3	3	6			2.24484	1.78186	-0.299871	1.66811	1.25512	2.48452		1.52243						4.69163	3.71907	-0.624187	3.50023	2.5328	5.01317			4.69163	3.71907	-0.624187	3.50023	2.5328	5.01317		0.326476		1.08656	0.796157	0.575881
Q2RB33	11.6426	9.93121	9.79771	10.9904	10.4099	11.1702	3	3	6			2.95852	0.866323	0.884787	1.64895	0.509656	2.48308		1.55855						6.18318	1.80818	1.8417	3.46002	1.02847	5.01027			6.18318	1.80818	1.8417	3.46002	1.02847	5.01027		0.777676		-0.111434	0.0663366	0.95506
Q9XH38	5.03307	7.49586	5.50653	11.1875	11.4356	11.1643	3	3	6			-3.65105	-1.56903	-3.4064	1.84604	1.53535	2.47718		-0.461318						-7.63056	-3.27486	-7.09049	3.87358	3.09829	4.99837			-7.63056	-3.27486	-7.09049	3.87358	3.09829	4.99837		0.278708		9.98872	8.64534	0.00249744
Q851W4	6.53199	10.4031	11.5084	11.5327	11.5754	11.164	3	3	6			-2.15213	1.33823	2.59547	2.19126	1.67509	2.47687		1.35413						-4.49788	2.79314	5.40252	4.59796	3.38027	4.99774			-4.49788	2.79314	5.40252	4.59796	3.38027	4.99774		0.0524986		3.09273	1.4693	0.361158
Q0J6H8	9.56466	7.55405	6.94848	10.6656	6.18388	11.1638	3	3	6			0.880541	-1.51084	-1.96444	1.32417	-3.71638	2.47674		-0.418368						1.8403	-3.1534	-4.08902	2.77852	-7.49954	4.99748			1.8403	-3.1534	-4.08902	2.77852	-7.49954	4.99748		0.372096		1.89286	0.555851	0.680256
Q9XFH4	10.7946	8.75499	14.3844	11.687	12.8677	11.1585	3	3	6			2.11046	-0.309899	5.47146	2.34554	2.96748	2.47139		2.5094						4.41077	-0.646818	11.389	4.9217	5.98827	4.98668			4.41077	-0.646818	11.389	4.9217	5.98827	4.98668		0.0193872		0.247916	0.07407	0.949954
P0C508	11.3894	10.9944	11.661	16.2896	11.6152	11.1546	3	3	6			2.70529	1.92947	2.7481	6.94813	1.7149	2.46753		3.08557						5.65396	4.02716	5.72022	14.5794	3.46062	4.9789			5.65396	4.02716	5.72022	14.5794	3.46062	4.9789		0.0493458		2.53919	0.881129	0.542942
Q5QMN5	9.35034	12.5785	10.214	10.0804	11.297	11.1542	3	3	6			0.666219	3.5136	1.30103	0.738981	1.39677	2.46709		1.68062						1.39237	7.33355	2.70812	1.55062	2.81863	4.978			1.39237	7.33355	2.70812	1.55062	2.81863	4.978		0.471415		-0.695599	0.409899	0.752676
Q69L19	12.7896	8.64476	11.9459	11.6389	12.2698	11.1524	3	3	6			4.10549	-0.42013	3.033	2.29745	2.36956	2.46532		2.30845						8.58032	-0.876889	6.31324	4.82079	4.7817	4.97442			8.58032	-0.876889	6.31324	4.82079	4.7817	4.97442		0.000851106		0.186745	0.0683421	0.953733
Q0DWQ1	10.6696	10.7706	9.85764	9.22759	8.71174	11.1478	3	3	6			1.98547	1.70569	0.944715	-0.113845	-1.18853	2.46075		0.965709						4.14956	3.5601	1.96645	-0.238884	-2.39841	4.9652			4.14956	3.5601	1.96645	-0.238884	-2.39841	4.9652		0.163491		-2.4494	1.54249	0.343291
Q67UK9	7.82343	10.4851	8.78908	11.8479	13.5248	11.1466	3	3	6			-0.860692	1.42024	-0.123846	2.50648	3.62452	2.45947		1.50436						-1.79881	2.9643	-0.257789	5.2594	7.31417	4.96264			-1.79881	2.9643	-0.257789	5.2594	7.31417	4.96264		0.434586		5.54283	5.32087	0.0250184
Q69JN6	8.7786	8.56396	11.6373	7.99531	11.1605	11.1465	3	3	6			0.0944796	-0.500928	2.72443	-1.34612	1.26024	2.45941		0.781917						0.197459	-1.04553	5.67095	-2.82459	2.54312	4.96251			0.197459	-1.04553	5.67095	-2.82459	2.54312	4.96251		0.89129		-0.0472828	0.0166492	0.988526
Q6ZDJ7	10.2494	10.6822	10.3767	10.6913	10.5219	11.1372	3	3	6			1.56523	1.61732	1.46374	1.34987	0.62163	2.45009		1.51131						3.27127	3.37565	3.04682	2.83246	1.25443	4.9437			3.27127	3.37565	3.04682	2.83246	1.25443	4.9437		0.0163456		-0.221047	0.225009	0.85559
Q0JMH0	12.9097	11.632	13.0061	13.5794	13.3042	11.1317	3	3	6			4.2256	2.56711	4.09321	4.238	3.40394	2.44457		3.4954						8.83134	5.35804	8.5201	8.89267	6.86905	4.93256			8.83134	5.35804	8.5201	8.89267	6.86905	4.93256		0.970055		-0.671735	0.524992	0.694963
Q5W6B9	9.84224	10.0349	9.16714	9.40484	10.4009	11.1314	3	3	6			1.15812	0.970049	0.254219	0.0634063	0.500614	2.44431		0.898453						2.42042	2.02468	0.529161	0.133047	1.01022	4.93204			2.42042	2.02468	0.529161	0.133047	1.01022	4.93204		0.264451		0.367019	0.272096	0.828116
B9G300	12.462	12.4142	11.7573	10.7313	10.318	11.1291	3	3	6			3.77792	3.34932	2.84442	1.38988	0.417713	2.442		2.37021						7.89571	6.99067	5.92073	2.91642	0.842931	4.92737			7.89571	6.99067	5.92073	2.91642	0.842931	4.92737		0.379692		-4.04013	4.76468	0.0367866
Q6YUL8	9.1324	9.2845	10.2508	11.4108	11.3696	11.1281	3	3	6			0.448274	0.219613	1.33785	2.06939	1.46933	2.44096		1.3309						0.936875	0.458374	2.78476	4.34223	2.96506	4.92529			0.936875	0.458374	2.78476	4.34223	2.96506	4.92529		0.803319		2.68419	4.54185	0.0429307
Q5JKB0	10.6518	10.387	8.66796	11.4071	10.5485	11.128	3	3	6			1.96765	1.32216	-0.24496	2.06562	0.648268	2.4409		1.36661						4.1123	2.7596	-0.50989	4.33433	1.30818	4.92516			4.1123	2.7596	-0.50989	4.33433	1.30818	4.92516		0.799995		1.40188	1.0802	0.472964
Q6ERW9	7.48204	9.1552	10.1759	8.71545	10.2293	11.1218	3	3	6			-1.20208	0.0903106	1.263	-0.62599	0.329035	2.4347		0.381495						-2.5123	0.188495	2.62896	-1.31353	0.663981	4.91264			-2.5123	0.188495	2.62896	-1.31353	0.663981	4.91264		0.790418		1.31931	0.722065	0.606229
B8BDQ4	10.1198	12.2552	7.95582	11.1914	10.0961	11.1164	3	3	6			1.43573	3.19032	-0.957099	1.84999	0.195791	2.42931		1.35734						3.00061	6.65879	-1.99222	3.88187	0.3951	4.90178			3.00061	6.65879	-1.99222	3.88187	0.3951	4.90178		0.456951		0.503857	0.203463	0.868464
F4I8S3	9.99365	11.9826	11.2539	11.7258	13.0872	11.1128	3	3	6			1.30952	2.91771	2.34098	2.38436	3.18698	2.42567		2.42754						2.73685	6.08982	4.87281	5.00314	6.43123	4.89443			2.73685	6.08982	4.87281	5.00314	6.43123	4.89443		0.406751		0.876439	1.09101	0.469432
Q8LIF2	10.2969	9.98769	9.52763	14.2071	9.82615	11.1019	3	3	6			1.61279	0.922803	0.61471	4.86565	-0.0741138	2.41482		1.72611						3.37068	1.92606	1.27953	10.2097	-0.149559	4.87252			3.37068	1.92606	1.27953	10.2097	-0.149559	4.87252		0.0819279		2.78546	1.27458	0.413347
F4IHS2	11.8065	12.0748	13.4929	10.7426	11.1277	11.1007	3	3	6			3.12243	3.00996	4.57993	1.40121	1.22747	2.41357		2.62576						6.52575	6.28235	9.53322	2.94018	2.477	4.87001			6.52575	6.28235	9.53322	2.94018	2.477	4.87001		0.658899		-4.01804	4.85293	0.0346036
Q9FUG4	11.0076	7.86437	8.06005	12.1454	10.1285	11.1003	3	3	6			2.32346	-1.20052	-0.852876	2.80395	0.228245	2.41317		0.952574						4.85595	-2.5057	-1.77528	5.88359	0.460591	4.86921			4.85595	-2.5057	-1.77528	5.88359	0.460591	4.86921		0.671364		3.54614	1.81274	0.284649
Q69QJ7	9.71485	11.1537	8.0289	11.6177	8.59515	11.1003	3	3	6			1.03072	2.08879	-0.884023	2.27626	-1.30512	2.41317		0.936634						2.15417	4.3597	-1.84011	4.77632	-2.63369	4.86921			2.15417	4.3597	-1.84011	4.77632	-2.63369	4.86921		0.695225		0.779361	0.299461	0.812556
P93823	7.70536	6.54184	8.50815	9.75178	11.3318	11.0994	3	3	6			-0.978767	-2.52305	-0.404772	0.410341	1.43149	2.41232		0.0579276						-2.04559	-5.26607	-0.842542	0.861027	2.8887	4.86749			-2.04559	-5.26607	-0.842542	0.861027	2.8887	4.86749		0.868247		5.59047	4.90472	0.0333835
Q7XTS3	10.9493	10.5064	12.321	10.9203	11.8353	11.0961	3	3	6			2.26519	1.44152	3.40805	1.57884	1.935	2.40903		2.17294						4.73417	3.00872	7.09392	3.31291	3.90476	4.86085			4.73417	3.00872	7.09392	3.31291	3.90476	4.86085		0.253365		-0.91943	0.97648	0.508218
Q75HQ3	8.21451	10.0349	8.53803	9.93117	9.58447	11.0949	3	3	6			-0.46961	0.970049	-0.37489	0.589729	-0.315791	2.40784		0.467888						-0.981467	2.02468	-0.780341	1.23744	-0.637256	4.85845			-0.981467	2.02468	-0.780341	1.23744	-0.637256	4.85845		0.531418		1.73192	1.28778	0.409582
Q7X923	10.3066	11.4619	8.71672	11.6265	13.0327	11.0916	3	3	6			1.62251	2.397	-0.196207	2.28509	3.13244	2.40454		1.9409						3.39098	5.00299	-0.408409	4.79486	6.32115	4.85179			3.39098	5.00299	-0.408409	4.79486	6.32115	4.85179		0.176813		2.66074	2.40784	0.188437
Q9FZ92	9.91012	9.71685	11.3885	11.5851	10.8465	11.0904	3	3	6			1.22599	0.651967	2.47558	2.24362	0.946244	2.40335		1.65779						2.56228	1.36078	5.15297	4.70783	1.90949	4.84939			2.56228	1.36078	5.15297	4.70783	1.90949	4.84939		0.845189		0.796893	0.696383	0.617117
Q2R8L1	10.0097	11.5353	9.83605	13.0899	11.495	11.09	3	3	6			1.32557	2.47044	0.923127	3.74844	1.59469	2.40295		2.07754						2.77038	5.15627	1.92151	7.86543	3.21803	4.84859			2.77038	5.15627	1.92151	7.86543	3.21803	4.84859		0.671909		2.02797	1.77821	0.291545
Q5Z5Q3	10.356	10.9863	9.90994	11.4681	12.5479	11.0817	3	3	6			1.67189	1.92145	0.997015	2.12668	2.64762	2.39459		1.95987						3.49418	4.01043	2.07531	4.46245	5.34281	4.83171			3.49418	4.01043	2.07531	4.46245	5.34281	4.83171		0.325857		1.68568	4.15719	0.0560479
B9G3M6	10.3032	11.4799	10.7809	11.6702	12.6188	11.0816	3	3	6			1.61909	2.41499	1.86794	2.32878	2.71856	2.39452		2.22398						3.38383	5.04055	3.88817	4.88652	5.48596	4.83158			3.38383	5.04055	3.88817	4.88652	5.48596	4.83158		0.308958		0.963837	2.78639	0.144949
P19898	10.8383	9.84822	10.6855	11.1637	10.9068	11.0767	3	3	6			2.15414	0.783329	1.77261	1.82228	1.00655	2.38965		1.65476						4.50206	1.63495	3.68973	3.82372	2.03119	4.82176			4.50206	1.63495	3.68973	3.82372	2.03119	4.82176		0.955944		0.283303	0.28246	0.822188
Q2QMN7	11.4044	11.5282	11.0225	12.8358	13.4348	11.0761	3	3	6			2.72027	2.46327	2.10958	3.49432	3.53449	2.38899		2.78515						5.68527	5.14132	4.39114	7.33219	7.13249	4.82041			5.68527	5.14132	4.39114	7.33219	7.13249	4.82041		0.356113		1.35579	2.30786	0.20196
Q9SIW2	8.39605	8.67899	9.823	9.6681	11.6403	11.0741	3	3	6			-0.288075	-0.3859	0.910077	0.326668	1.74003	2.38698		0.781629						-0.602066	-0.805445	1.89435	0.685453	3.51131	4.81636			-0.602066	-0.805445	1.89435	0.685453	3.51131	4.81636		0.672811		2.8421	2.93921	0.130379
Q0JA83	9.11426	9.26205	10.988	11.0119	10.2628	11.0733	3	3	6			0.43014	0.197161	2.07505	1.67049	0.362535	2.38618		1.18693						0.898975	0.411512	4.31926	3.50522	0.731583	4.81474			0.898975	0.411512	4.31926	3.50522	0.731583	4.81474		0.978861		1.1406	0.879294	0.543633
Q8H930	11.0262	8.57266	3.06719	9.93463	9.10418	11.0706	3	3	6			2.34205	-0.492225	-5.84573	0.593197	-0.796086	2.3835		-0.302549						4.8948	-1.02737	-12.168	1.24472	-1.60647	4.80933			4.8948	-1.02737	-12.168	1.24472	-1.60647	4.80933		0.242028		4.24938	1.08823	0.470337
Q69UZ3	10.8519	10.9477	11.2613	11.8156	12.7705	11.0702	3	3	6			2.16778	1.88282	2.34835	2.47419	2.87021	2.38309		2.35441						4.53058	3.92981	4.88814	5.19163	5.792	4.80852			4.53058	3.92981	4.88814	5.19163	5.792	4.80852		0.976657		0.814541	3.16518	0.111477
Q9FNM7	12.3647	12.4689	12.2413	11.8255	12.653	11.0674	3	3	6			3.68053	3.40404	3.32837	2.48408	2.75278	2.38027		3.00501						7.69217	7.10488	6.92808	5.21239	5.55502	4.80283			7.69217	7.10488	6.92808	5.21239	5.55502	4.80283		0.939779		-2.05163	8.40846	0.00294308
Q53NF7	7.55674	10.5355	11.4874	12.3174	12.6598	11.0634	3	3	6			-1.12739	1.47058	2.57451	2.97598	2.75951	2.3763		1.83825						-2.3562	3.06938	5.35891	6.24455	5.5686	4.79481			-2.3562	3.06938	5.35891	6.24455	5.5686	4.79481		0.0648607		3.51195	2.28251	0.20554
Q9SYP1	11.7563	10.7914	9.93195	11.5731	13.1111	11.0631	3	3	6			3.07218	1.72652	1.01903	2.23164	3.21082	2.37603		2.2727						6.42074	3.60357	2.12112	4.6827	6.47933	4.79427			6.42074	3.60357	2.12112	4.6827	6.47933	4.79427		0.350414		1.27029	1.27924	0.412012
Q10DV7	11.0375	12.0284	9.27829	11.7487	12.1655	11.0623	3	3	6			2.35342	2.96354	0.365363	2.40726	2.26521	2.37522		2.12167						4.91857	6.18546	0.760512	5.0512	4.57111	4.79263			4.91857	6.18546	0.760512	5.0512	4.57111	4.79263		0.0142346		0.850137	0.608213	0.656009
Q7EZW6	10.0584	8.54361	10.6119	9.2431	10.6517	11.0619	3	3	6			1.37427	-0.521275	1.69902	-0.0983346	0.751415	2.37482		0.929987						2.87218	-1.088	3.53655	-0.206337	1.51633	4.79182			2.87218	-1.088	3.53655	-0.206337	1.51633	4.79182		0.984682		0.260358	0.143368	0.905403
O09781	9.47859	7.64046	11.1365	12.5865	13.2462	11.057	3	3	6			0.794464	-1.42443	2.22356	3.24505	3.34591	2.36995		1.75908						1.6604	-2.97304	4.62838	6.80915	6.75194	4.782			1.6604	-2.97304	4.62838	6.80915	6.75194	4.782		0.166436		5.00912	3.38112	0.0959799
Q0DIQ5	10.8669	10.6876	10.8973	13.674	13.5988	11.0551	3	3	6			2.18277	1.62266	1.98439	4.33253	3.69849	2.36799		2.69814						4.5619	3.3868	4.13056	9.09104	7.46342	4.77803			4.5619	3.3868	4.13056	9.09104	7.46342	4.77803		0.138647		3.08441	3.69655	0.0771306
Q93VY3	11.7816	10.9968	7.23093	6.2675	9.07425	11.0543	3	3	6			3.09748	1.93194	-1.68199	-3.07394	-0.826016	2.36724		0.302453						6.47362	4.03232	-3.5011	-6.45011	-1.66687	4.77653			6.47362	4.03232	-3.5011	-6.45011	-1.66687	4.77653		0.919957		-3.44843	1.06057	0.479442
Q9FFQ1	9.61985	12.1909	8.66374	11.1215	10.991	11.0496	3	3	6			0.93573	3.12605	-0.249187	1.7801	1.09076	2.36248		1.50766						1.95564	6.52465	-0.518689	3.73521	2.20112	4.76693			1.95564	6.52465	-0.518689	3.73521	2.20112	4.76693		0.230954		0.913886	0.518006	0.698336
Q7XWP1	10.2595	6.88935	10.3082	10.5487	9.91018	11.0472	3	3	6			1.57538	-2.17554	1.3953	1.20729	0.00991299	2.3601		0.728742						3.29249	-4.54075	2.90435	2.53328	0.0200041	4.76212			3.29249	-4.54075	2.90435	2.53328	0.0200041	4.76212		0.448165		1.88643	0.862479	0.550007
Q84M43	9.72909	10.1007	8.26519	11.3933	11.4514	11.0466	3	3	6			1.04497	1.03578	-0.64773	2.0519	1.55115	2.35955		1.2326						2.18395	2.16186	-1.34826	4.30554	3.13017	4.76102			2.18395	2.16186	-1.34826	4.30554	3.13017	4.76102		0.292536		3.0664	3.77111	0.0732458
Q6ZHS4	8.81089	8.95495	7.05539	7.79636	9.79381	11.0447	3	3	6			0.12677	-0.109935	-1.85753	-1.54507	-0.10645	2.35764		-0.189097						0.264944	-0.229454	-3.86649	-3.24206	-0.214813	4.75716			0.264944	-0.229454	-3.86649	-3.24206	-0.214813	4.75716		0.475671		1.71043	0.844849	0.556769
F4IJV4	10.7226	10.202	16.0217	10.3326	10.8209	11.0445	3	3	6			2.03851	1.13711	7.10875	0.991159	0.920632	2.35744		2.4256						4.26042	2.37337	14.797	2.07977	1.85781	4.75675			4.26042	2.37337	14.797	2.07977	1.85781	4.75675		0.109784		-4.24549	1.5321	0.345773
Q6ENH8	10.7655	8.34038	11.4092	11.5958	12.5314	11.0388	3	3	6			2.08141	-0.724503	2.49631	2.25433	2.63114	2.35169		1.8484						4.35007	-1.51217	5.19612	4.73031	5.30956	4.74515			4.35007	-1.51217	5.19612	4.73031	5.30956	4.74515		0.0162082		2.25033	1.32992	0.39779
Q9M1I1	10.6191	9.48915	10.4041	11.6019	11.3277	11.0388	3	3	6			1.935	0.424258	1.49115	2.26043	1.4274	2.35169		1.64832						4.04407	0.885507	3.10387	4.7431	2.88045	4.74515			4.04407	0.885507	3.10387	4.7431	2.88045	4.74515		0.611274		1.44508	1.9006	0.267832
Q2QVG8	10.0531	5.5997	10.7372	10.0467	11.831	11.0346	3	3	6			1.36899	-3.46518	1.82432	0.705278	1.93069	2.3475		0.785265						2.86113	-7.23249	3.79737	1.4799	3.89606	4.73669			2.86113	-7.23249	3.79737	1.4799	3.89606	4.73669		0.142		3.56221	1.37362	0.385922
Q0DM51	7.74712	12.5952	10.6364	10.4234	10.917	11.0316	3	3	6			-0.937004	3.53028	1.72352	1.08199	1.01673	2.34454		1.46001						-1.9583	7.36835	3.58754	2.27037	2.05174	4.73072			-1.9583	7.36835	3.58754	2.27037	2.05174	4.73072		0.182748		0.0184116	0.00702848	0.99514
Q9FKA0	9.3247	9.34578	9.36041	11.3644	9.40058	11.026	3	3	6			0.640575	0.280895	0.447485	2.02292	-0.499684	2.33888		0.871844						1.33878	0.586281	0.931449	4.24472	-1.00835	4.7193			1.33878	0.586281	0.931449	4.24472	-1.00835	4.7193		0.0276951		1.69972	1.14394	0.452524
Q7XR52	9.25375	10.7092	10.6557	11.7997	11.7463	11.0238	3	3	6			0.56963	1.64428	1.74279	2.45829	1.84608	2.33666		1.76629						1.1905	3.43193	3.62765	5.15828	3.72533	4.71483			1.1905	3.43193	3.62765	5.15828	3.72533	4.71483		0.453808		1.78279	3.11461	0.115454
Q6ETL2	9.48856	7.51901	9.64046	10.91	10.8647	11.0172	3	3	6			0.80444	-1.54588	0.727538	1.56861	0.964463	2.33006		0.808205						1.68125	-3.22654	1.51439	3.29144	1.94625	4.70151			1.68125	-3.22654	1.51439	3.29144	1.94625	4.70151		0.392869		3.32337	2.86025	0.137714
Q6Z869	8.95719	7.68454	9.79654	7.82801	14.5885	11.0132	3	3	6			0.273066	-1.38035	0.883619	-1.51343	4.68822	2.32609		0.879535						0.570697	-2.88105	1.83927	-3.17565	9.46067	4.69349			0.570697	-2.88105	1.83927	-3.17565	9.46067	4.69349		0.255632		3.81653	1.36547	0.388108
Q5WMW5	8.73647	9.58391	9.0474	10.3455	10.5921	11.0132	3	3	6			0.0523463	0.519023	0.134473	1.00408	0.691818	2.32609		0.787971						0.109402	1.0833	0.279909	2.10688	1.39607	4.69349			0.109402	1.0833	0.279909	2.10688	1.39607	4.69349		0.164838		2.24128	3.33974	0.0987729
Q5VPE5	5.93883	9.00809	7.58901	12.5874	10.9997	11.013	3	3	6			-2.7453	-0.0567947	-1.32391	3.24592	1.09945	2.32595		0.42422						-5.73756	-0.118541	-2.75574	6.81097	2.21866	4.69321			-5.73756	-0.118541	-2.75574	6.81097	2.21866	4.69321		0.801284		7.4449	5.39437	0.0237757
Q75IR6	11.1021	11.1101	11.5746	9.63807	10.464	11.0061	3	3	6			2.41798	2.0452	2.66172	0.296637	0.56377	2.31902		1.71739						5.05349	4.26873	5.54042	0.622438	1.13767	4.67923			5.05349	4.26873	5.54042	0.622438	1.13767	4.67923		0.15567		-2.80777	3.29387	0.101964
Q10M50	8.29549	9.73801	8.37077	12.6504	12.6998	11.0049	3	3	6			-0.38863	0.673121	-0.542149	3.30894	2.79952	2.31776		1.36143						-0.812221	1.40493	-1.12849	6.94322	5.64935	4.67669			-0.812221	1.40493	-1.12849	6.94322	5.64935	4.67669		0.808419		5.93501	7.78258	0.0045416
Q9FT72	10.7146	11.0448	8.29614	10.2431	10.6653	11.0006	3	3	6			2.03047	1.97992	-0.616787	0.901618	0.765071	2.31347		1.22896						4.2436	4.13246	-1.28386	1.89188	1.54389	4.66803			4.2436	4.13246	-1.28386	1.89188	1.54389	4.66803		0.453953		0.337201	0.186431	0.878777
Q6ZEZ5	8.34314	11.2511	10.5291	12.6627	11.1604	10.9958	3	3	6			-0.340982	2.18618	1.61621	3.32125	1.26017	2.30874		1.72526						-0.712639	4.56297	3.36418	6.96905	2.54299	4.6585			-0.712639	4.56297	3.36418	6.96905	2.54299	4.6585		0.781049		2.31867	1.64268	0.320262
Q7FGZ2	11.355	9.01681	9.44983	11.0163	10.2773	10.9903	3	3	6			2.6709	-0.0480788	0.536906	1.67488	0.377022	2.30322		1.25248						5.58207	-0.10035	1.11758	3.51444	0.760819	4.64736			5.58207	-0.10035	1.11758	3.51444	0.760819	4.64736		0.617207		0.774437	0.457575	0.728209
B7F958	6.37097	10.5538	7.83118	6.6254	8.25281	10.9831	3	3	6			-2.31316	1.48893	-1.08174	-2.71604	-1.64746	2.29604		-0.662236						-4.83441	3.10769	-2.25167	-5.69911	-3.32452	4.63287			-4.83441	3.10769	-2.25167	-5.69911	-3.32452	4.63287		0.718292		-0.137454	0.03861	0.973592
Q6YY75	8.62531	10.1517	10.49	7.30022	11.6154	10.9792	3	3	6			-0.0588162	1.08676	1.57713	-2.04122	1.71518	2.29212		0.761858						-0.122924	2.26828	3.28282	-4.28314	3.46118	4.62495			-0.122924	2.26828	3.28282	-4.28314	3.46118	4.62495		0.230728		-0.541728	0.210485	0.864246
Q7XBY6	9.19636	10.5897	10.5754	11.99	10.808	10.9776	3	3	6			0.512233	1.52486	1.66243	2.64856	0.907734	2.29047		1.59105						1.07055	3.18266	3.46038	5.55753	1.83178	4.62163			1.07055	3.18266	3.46038	5.55753	1.83178	4.62163		0.62516		1.43245	1.52128	0.348376
Q6AVA8	8.24698	11.9825	9.21065	10.692	11.8913	10.9763	3	3	6			-0.437145	2.91764	0.297724	1.35057	1.99106	2.28926		1.40152						-0.913617	6.08967	0.619718	2.83392	4.0179	4.61917			-0.913617	6.08967	0.619718	2.83392	4.0179	4.61917		0.114769		1.89174	1.19673	0.436262
Q6ZBF6	8.64364	12.6382	10.5967	11.2876	7.71569	10.9733	3	3	6			-0.0404835	3.57335	1.68373	1.94616	-2.18458	2.28624		1.21074						-0.0846089	7.45824	3.50472	4.08366	-4.40841	4.6131			-0.0846089	7.45824	3.50472	4.08366	-4.40841	4.6131		0.714141		-2.19667	0.787688	0.579272
Q5VRN0	11.0466	10.5606	8.31225	9.38804	10.9333	10.9697	3	3	6			2.36252	1.49573	-0.600676	0.0466016	1.03306	2.28258		1.1033						4.93758	3.12187	-1.25032	0.0977851	2.08468	4.6057			4.93758	3.12187	-1.25032	0.0977851	2.08468	4.6057		0.670655		-0.00699123	0.00336224	0.997672
P27502	12.1757	10.8962	12.4857	12.9749	13.3937	10.9672	3	3	6			3.49161	1.83129	3.57275	3.63344	3.49339	2.28006		3.05043						7.29734	3.82225	7.43676	7.62412	7.04955	4.60062			7.29734	3.82225	7.43676	7.62412	7.04955	4.60062		0.76147		0.239314	0.182522	0.881161
Q6H7M7	6.21393	9.01926	10.8552	12.0911	12.1931	10.9653	3	3	6			-2.47019	-0.04563	1.94226	2.74963	2.2928	2.27819		1.12451						-5.16261	-0.0952384	4.04285	5.76961	4.62679	4.59684			-5.16261	-0.0952384	4.04285	5.76961	4.62679	4.59684		0.0411955		5.40275	2.49685	0.177164
Q60EX7	10.5046	10.4598	10.9377	10.6137	12.0026	10.9651	3	3	6			1.8205	1.39495	2.02482	1.27226	2.10234	2.27804		1.81548						3.80477	2.91153	4.2147	2.66961	4.24245	4.59655			3.80477	2.91153	4.2147	2.66961	4.24245	4.59655		0.593589		0.192534	0.324409	0.798625
Q0D8N0	9.93749	9.29715	11.5974	9.19953	12.5728	10.9633	3	3	6			1.25337	0.232258	2.68452	-0.141912	2.67253	2.27624		1.49617						2.61949	0.484767	5.58789	-0.297777	5.39308	4.5929			2.61949	0.484767	5.58789	-0.297777	5.39308	4.5929		0.818022		0.332017	0.163539	0.892832
Q10CQ8	9.34225	11.1249	8.79555	9.64854	10.4371	10.9575	3	3	6			0.658129	2.06001	-0.117371	0.3071	0.536863	2.27044		0.952529						1.37546	4.29963	-0.24431	0.644394	1.08337	4.58122			1.37546	4.29963	-0.24431	0.644394	1.08337	4.58122		0.9348		0.292733	0.184198	0.880138
Q7XKR9	11.4962	12.7805	11.5246	11.2837	12.414	10.9549	3	3	6			2.81203	3.71565	2.61167	1.94229	2.51371	2.26783		2.64386						5.87704	7.75527	5.43624	4.07554	5.07258	4.57594			5.87704	7.75527	5.43624	4.07554	5.07258	4.57594		0.281584		-1.78149	3.62742	0.0809166
Q653S9	10.494	9.68408	7.9589	9.47913	11.2116	10.9546	3	3	6			1.80983	0.619195	-0.954023	0.137696	1.31138	2.26754		0.86527						3.78248	1.29238	-1.98582	0.288931	2.64632	4.57535			3.78248	1.29238	-1.98582	0.288931	2.64632	4.57535		0.710185		1.47386	0.949851	0.517686
Q5VNU3	11.594	4.32726	4.15955	10.204	12.5582	10.9523	3	3	6			2.90983	-4.73763	-4.75338	0.862522	2.65794	2.26521		-0.132584						6.08143	-9.88833	-9.89425	1.80985	5.36364	4.57066			6.08143	-9.88833	-9.89425	1.80985	5.36364	4.57066		0.0786251		8.48176	2.36997	0.19345
Q8W103	11.4876	9.95973	10.3196	10.7903	11.0673	10.9522	3	3	6			2.80352	0.89484	1.40664	1.44883	1.16703	2.26514		1.66433						5.85924	1.8677	2.92794	3.04011	2.35504	4.57051			5.85924	1.8677	2.92794	3.04011	2.35504	4.57051		0.462693		-0.229742	0.193975	0.874194
Q7XKV4	10.4155	9.88721	8.55313	9.84086	12.0079	10.9513	3	3	6			1.73141	0.822318	-0.359793	0.499419	2.1076	2.26419		1.17752						3.61857	1.71633	-0.748918	1.04794	4.25307	4.5686			3.61857	1.71633	-0.748918	1.04794	4.25307	4.5686		0.883514		1.76121	1.48711	0.356726
Q5N712	10.5272	9.67145	11.1177	9.11374	8.58417	10.9454	3	3	6			1.84306	0.606566	2.20478	-0.227695	-1.31609	2.25828		0.894817						3.85193	1.26602	4.58931	-0.477777	-2.65583	4.55667			3.85193	1.26602	4.58931	-0.477777	-2.65583	4.55667		0.364098		-2.7614	1.70274	0.307203
Q6ZI17	9.46371	9.28683	9.8858	10.856	10.437	10.9453	3	3	6			0.779585	0.221948	0.97288	1.5146	0.536759	2.2582		1.04733						1.6293	0.463247	2.02507	3.17811	1.08316	4.55652			1.6293	0.463247	2.02507	3.17811	1.08316	4.55652		0.354626		1.56672	2.10728	0.232084
A3ACF3	10.5589	8.20955	7.89093	8.75134	10.7236	10.9431	3	3	6			1.87478	-0.855336	-1.02199	-0.590094	0.823311	2.25601		0.414445						3.91821	-1.78525	-2.12729	-1.23821	1.66141	4.55209			3.91821	-1.78525	-2.12729	-1.23821	1.66141	4.55209		0.841795		1.65654	0.848774	0.555256
Q8S1D9	7.97355	9.32096	9.81881	6.42254	10.6135	10.943	3	3	6			-0.710569	0.256071	0.905882	-2.9189	0.713248	2.25586		0.0835986						-1.48506	0.534469	1.88561	-6.12479	1.43931	4.55179			-1.48506	0.534469	1.88561	-6.12479	1.43931	4.55179		0.174261		-0.356235	0.120815	0.919668
P0C8Z0	8.98145	9.3208	10.7956	8.30236	8.59518	10.9423	3	3	6			0.29733	0.255913	1.88271	-1.03907	-1.30508	2.2552		0.391167						0.621408	0.534139	3.9189	-2.18031	-2.63361	4.55046			0.621408	0.534139	3.9189	-2.18031	-2.63361	4.55046		0.373986		-1.7793	0.922066	0.527753
Q5SMM6	3.60987	6.71425	10.5899	8.88136	12.5004	10.9418	3	3	6			-5.07425	-2.35064	1.67701	-0.460078	2.6001	2.25469		-0.225528						-10.605	-4.90623	3.49073	-0.965392	5.24693	4.54942			-10.605	-4.90623	3.49073	-0.965392	5.24693	4.54942		0.374455		6.95048	2.31752	0.200612
Q7XFK2	11.364	8.67797	9.55451	11.1744	11.9612	10.9391	3	3	6			2.6799	-0.386921	0.641589	1.83299	2.0609	2.25197		1.5134						5.60089	-0.807577	1.33548	3.8462	4.15882	4.54394			5.60089	-0.807577	1.33548	3.8462	4.15882	4.54394		0.0226947		2.14005	1.42042	0.373602
P51431	10.405	11.362	10.4242	12.6102	11.7348	10.9358	3	3	6			1.72091	2.29711	1.51124	3.26878	1.83449	2.24873		2.14688						3.59664	4.7945	3.14568	6.85894	3.70194	4.53741			3.59664	4.7945	3.14568	6.85894	3.70194	4.53741		0.426909		1.18715	1.61095	0.327382
Q5Z9Z0	10.0183	9.04065	7.12288	4.55287	8.96535	10.9345	3	3	6			1.33422	-0.0242412	-1.79004	-4.78857	-0.934914	2.24741		-0.659357						2.78846	-0.050596	-3.72601	-10.0479	-1.88663	4.53473			2.78846	-0.050596	-3.72601	-10.0479	-1.88663	4.53473		0.332935		-2.13723	0.582481	0.667814
Q09151	9.72006	9.44315	8.6915	11.2616	8.54963	10.9293	3	3	6			1.03593	0.378264	-0.221424	1.92013	-1.35063	2.24224		0.667418						2.16506	0.789507	-0.460899	4.02904	-2.72554	4.5243			2.16506	0.789507	-0.460899	4.02904	-2.72554	4.5243		0.190315		1.11138	0.567816	0.674637
Q5W670	10.4456	6.94626	7.09318	8.06415	8.20114	10.9272	3	3	6			1.76151	-2.11862	-1.81974	-1.27729	-1.69912	2.24009		-0.485529						3.68149	-4.42197	-3.78783	-2.68016	-3.42877	4.51997			3.68149	-4.42197	-3.78783	-2.68016	-3.42877	4.51997		0.973576		0.979784	0.320691	0.800686
Q84ZT0	10.3836	6.87135	11.0725	10.5054	9.35198	10.9258	3	3	6			1.69947	-2.19354	2.15954	1.16398	-0.548288	2.23868		0.753309						3.55183	-4.57832	4.49514	2.4424	-1.10643	4.51713			3.55183	-4.57832	4.49514	2.4424	-1.10643	4.51713		0.490528		0.794817	0.282239	0.822314
B8B0R8	9.26695	9.26994	2.76158	8.23295	9.96622	10.9256	3	3	6			0.582827	0.205058	-6.15134	-1.10849	0.065952	2.23846		-0.694589						1.21809	0.427994	-12.8041	-2.32596	0.133089	4.51668			1.21809	0.427994	-12.8041	-2.32596	0.133089	4.51668		0.324398		4.49396	1.26215	0.416922
Q10RR9	11.5262	11.4062	9.40504	11.5927	11.0756	10.9221	3	3	6			2.84208	2.34132	0.492112	2.25125	1.17535	2.23497		1.88951						5.93984	4.88677	1.02434	4.72385	2.37181	4.50964			5.93984	4.88677	1.02434	4.72385	2.37181	4.50964		0.403206		-0.0818847	0.0539518	0.963294
Q851R2	4.23749	11.8175	8.40024	11.0185	10.0007	10.9182	3	3	6			-4.44664	2.75262	-0.512684	1.67711	0.100439	2.2311		0.300324						-9.2933	5.74523	-1.06716	3.51911	0.202683	4.50183			-9.2933	5.74523	-1.06716	3.51911	0.202683	4.50183		0.164276		4.27962	1.32537	0.399047
Q6AUC6	9.09342	9.96382	9.92796	9.38217	8.97682	10.9141	3	3	6			0.409294	0.898934	1.01503	0.0407329	-0.923443	2.22699		0.611257						0.855409	1.87624	2.11281	0.0854706	-1.86348	4.49354			0.855409	1.87624	2.11281	0.0854706	-1.86348	4.49354		0.0807935		-0.709644	0.453351	0.730345
B9FMJ3	11.2799	9.0601	9.72571	8.85929	10.5805	10.9107	3	3	6			2.59578	-0.00478567	0.812784	-0.482151	0.680276	2.22362		0.970921						5.42508	-0.00998858	1.69183	-1.01171	1.37278	4.48674			5.42508	-0.00998858	1.69183	-1.01171	1.37278	4.48674		0.991763		-0.753033	0.403958	0.755782
Q8LQX2	11.848	10.3576	9.99365	16.0835	12.132	10.9097	3	3	6			3.16391	1.29266	1.08072	6.74206	2.23178	2.22265		2.78897						6.61246	2.69803	2.24955	14.147	4.50367	4.48478			6.61246	2.69803	2.24955	14.147	4.50367	4.48478		0.312875		3.85847	1.58838	0.332545
F4KFV7	9.8258	10.775	9.76328	10.1126	12.9123	10.9082	3	3	6			1.14168	1.71015	0.850355	0.771133	3.01208	2.22115		1.61776						2.38606	3.5694	1.77003	1.61808	6.07828	4.48175			2.38606	3.5694	1.77003	1.61808	6.07828	4.48175		0.281404		1.48421	1.50986	0.351144
Q67UU0	11.4578	10.995	10.5436	11.7475	10.8559	10.9045	3	3	6			2.77367	1.9301	1.63069	2.40604	0.955616	2.21739		1.98558						5.79686	4.02849	3.39431	5.04865	1.9284	4.47417			5.79686	4.02849	3.39431	5.04865	1.9284	4.47417		0.7197		-0.589482	0.624702	0.648554
Q6Z829	9.82032	8.46001	10.4498	12.7837	10.923	10.9039	3	3	6			1.1362	-0.604882	1.53684	3.4423	1.02269	2.21679		1.45832						2.37461	-1.2625	3.19897	7.22304	2.06376	4.47295			2.37461	-1.2625	3.19897	7.22304	2.06376	4.47295		0.91636		3.14955	2.35984	0.194813
Q6Z7L3	10.9666	11.7424	12.9581	11.7865	12.3595	10.8941	3	3	6			2.28253	2.67746	4.04519	2.44504	2.45926	2.20704		2.68609						4.77039	5.58837	8.42016	5.13047	4.96272	4.45329			4.77039	5.58837	8.42016	5.13047	4.96272	4.45329		0.0655885		-1.41082	1.84751	0.277872
Q2R2B1	9.81839	10.9062	10.0403	8.85449	11.4322	10.892	3	3	6			1.13427	1.84133	1.12737	-0.486943	1.53191	2.20492		1.22547						2.37058	3.8432	2.34664	-1.02176	3.09135	4.449			2.37058	3.8432	2.34664	-1.02176	3.09135	4.449		0.166062		-0.680607	0.489774	0.712137
Q38953	11.9692	12.0638	10.9473	10.3565	11.6882	10.8865	3	3	6			3.28505	2.99888	2.03435	1.01501	1.7879	2.19936		2.22009						6.86562	6.25922	4.23454	2.12983	3.60792	4.4378			6.86562	6.25922	4.23454	2.12983	3.60792	4.4378		0.837187		-2.39462	3.58448	0.0833609
Q6YW64	11.5723	5.94855	11.4593	9.5468	10.2511	10.88	3	3	6			2.8882	-3.11633	2.54641	0.205361	0.350862	2.19295		0.844574						6.03622	-6.50437	5.3004	0.430913	0.708029	4.42485			6.03622	-6.50437	5.3004	0.430913	0.708029	4.42485		0.182524		0.243847	0.0632266	0.957121
Q10CE4	11.428	12.1506	11.609	11.422	12.5488	10.8792	3	3	6			2.74387	3.08575	2.69607	2.08057	2.64851	2.19211		2.57448						5.73458	6.44054	5.61193	4.36571	5.3446	4.42315			5.73458	6.44054	5.61193	4.36571	5.3446	4.42315		0.797183		-1.21786	4.61441	0.0408247
B2ZX90	9.80025	12.2906	8.70981	12.8622	12.6847	10.8784	3	3	6			1.11613	3.22571	-0.203116	3.52081	2.78444	2.19126		2.10587						2.33267	6.73266	-0.42279	7.38779	5.61891	4.42145			2.33267	6.73266	-0.42279	7.38779	5.61891	4.42145		0.292019		2.92854	1.92234	0.263826
Q02119	12.6253	12.0918	11.9395	11.3412	12.3655	10.8771	3	3	6			3.94115	3.02688	3.02658	1.99975	2.46526	2.19004		2.77494						8.23686	6.31766	6.29989	4.19611	4.97482	4.41897			8.23686	6.31766	6.29989	4.19611	4.97482	4.41897		0.229757		-2.4215	5.38601	0.0239139
Q7XPJ0	12.0957	11.583	12.8574	11.3339	13.5119	10.8708	3	3	6			3.41154	2.51815	3.94447	1.99244	3.61161	2.18366		2.94365						7.12998	5.25585	8.21051	4.18079	7.28811	4.4061			7.12998	5.25585	8.21051	4.18079	7.28811	4.4061		0.853532		-1.57378	1.73962	0.299448
Q8RZV7	9.17834	9.99506	11.4546	9.78011	11.6868	10.8703	3	3	6			0.494218	0.930173	2.54168	0.438676	1.78654	2.18319		1.39575						1.0329	1.94145	5.29057	0.920482	3.60518	4.40517			1.0329	1.94145	5.29057	0.920482	3.60518	4.40517		0.797066		0.221973	0.150981	0.900638
Q6ENI3	11.0812	10.102	9.33829	7.95472	8.21145	10.8669	3	3	6			2.39703	1.03709	0.425367	-1.38672	-1.68881	2.1798		0.493958						5.0097	2.1646	0.885411	-2.90978	-3.40797	4.39832			5.0097	2.1646	0.885411	-2.90978	-3.40797	4.39832		0.3784		-3.32638	1.73277	0.300873
Q69V23	10.5596	11.6777	8.2116	12.0699	14.9905	10.866	3	3	6			1.87545	2.61279	-0.701327	2.72842	5.09028	2.17895		2.29743						3.91961	5.45338	-1.45983	5.72509	10.272	4.3966			3.91961	5.45338	-1.45983	5.72509	10.272	4.3966		0.837382		4.16018	2.28792	0.20477
Q8H3I4	10.642	11.8866	6.34915	9.54224	9.69113	10.8651	3	3	6			1.95784	2.82172	-2.56377	0.200801	-0.209132	2.17802		0.730914						4.09181	5.88947	-5.33654	0.421346	-0.422022	4.39473			4.09181	5.88947	-5.33654	0.421346	-0.422022	4.39473		0.307933		-0.0835603	0.024086	0.983443
Q7XLR1	10.6769	10.78	5.50599	9.32964	8.36554	10.8647	3	3	6			1.9928	1.71508	-3.40694	-0.0117978	-1.53473	2.17763		0.155342						4.16488	3.57969	-7.09161	-0.0247556	-3.09704	4.39395			4.16488	3.57969	-7.09161	-0.0247556	-3.09704	4.39395		0.521945		0.206398	0.053428	0.963644
Q7XUG1	8.39356	9.93824	10.677	9.65012	4.94341	10.8639	3	3	6			-0.290561	0.873355	1.76409	0.308681	-4.95686	2.17678		-0.0207518						-0.607262	1.82286	3.67199	0.647712	-10.0028	4.39223			-0.607262	1.82286	3.67199	0.647712	-10.0028	4.39223		0.15256		-3.28348	0.986157	0.504821
Q5Z5S6	8.30424	8.25923	8.1955	9.77857	11.5003	10.8577	3	3	6			-0.379886	-0.805662	-0.717428	0.437133	1.60008	2.17058		0.384135						-0.793947	-1.68157	-1.49334	0.917244	3.22891	4.37971			-0.793947	-1.68157	-1.49334	0.917244	3.22891	4.37971		0.131447		4.1649	5.89895	0.0167586
Q84R21	9.50946	8.30268	9.61539	10.0264	10.957	10.8577	3	3	6			0.825335	-0.762202	0.702467	0.684948	1.05669	2.17058		0.779636						1.72492	-1.59086	1.4622	1.43724	2.13237	4.37971			1.72492	-1.59086	1.4622	1.43724	2.13237	4.37971		0.820897		2.11769	2.31297	0.201246
D8WUA4	10.4189	10.7266	11.4392	10.5002	11.9064	10.8499	3	3	6			1.73478	1.66167	2.52628	1.15881	2.00617	2.16278		1.87508						3.62563	3.46822	5.25851	2.43155	4.0484	4.36398			3.62563	3.46822	5.25851	2.43155	4.0484	4.36398		0.955296		-0.502815	0.794569	0.576515
B9FS74	11.3744	11.7074	9.85991	11.2063	12.0855	10.8482	3	3	6			2.69032	2.64252	0.946984	1.86484	2.18524	2.16106		2.08183						5.62266	5.51543	1.97117	3.91304	4.40974	4.3605			5.62266	5.51543	1.97117	3.91304	4.40974	4.3605		0.0340996		-0.141989	0.12502	0.916992
Q6AWY1	7.84662	8.58838	7.50208	9.70936	10.9302	10.8446	3	3	6			-0.837505	-0.47651	-1.41085	0.367922	1.02995	2.15753		0.138425						-1.75035	-0.994565	-2.93671	0.772019	2.07842	4.35339			-1.75035	-0.994565	-2.93671	0.772019	2.07842	4.35339		0.451752		4.29515	5.4723	0.0225255
Q5SMU7	10.7969	8.08151	10.904	10.2248	11.848	10.8415	3	3	6			2.11281	-0.983377	1.99103	0.883409	1.94777	2.15439		1.35101						4.41569	-2.05249	4.14438	1.85367	3.93054	4.34705			4.41569	-2.05249	4.14438	1.85367	3.93054	4.34705		0.235207		1.2079	0.690492	0.619642
Q8S3R2	9.40627	7.66213	9.03111	9.48826	10.603	10.8363	3	3	6			0.722146	-1.40275	0.118185	0.146825	0.702712	2.14919		0.406051						1.50926	-2.92781	0.246004	0.308085	1.41805	4.33656			1.50926	-2.92781	0.246004	0.308085	1.41805	4.33656		0.906198		2.41175	2.0118	0.247963
A3AVH5	11.9321	9.06926	8.55021	10.006	9.943	10.8339	3	3	6			3.24794	0.00437468	-0.362715	0.664608	0.0427332	2.14682		0.957295						6.78808	0.00913077	-0.755	1.39456	0.0862343	4.33178			6.78808	0.00913077	-0.755	1.39456	0.0862343	4.33178		0.430405		-0.0765447	0.0309318	0.978788
Q5N863	12.4673	13.1329	13.0956	10.4705	13.4467	10.8313	3	3	6			3.78315	4.06805	4.18264	1.12902	3.54643	2.14421		3.14225						7.90664	8.49078	8.70625	2.36904	7.15658	4.32651			7.90664	8.49078	8.70625	2.36904	7.15658	4.32651		0.0573937		-3.75051	4.14816	0.0564001
Q7XTT4	8.39279	10.7922	9.67013	11.0299	9.70285	10.828	3	3	6			-0.291334	1.72733	0.757202	1.68847	-0.197417	2.14088		0.970857						-0.608876	3.60527	1.57613	3.54295	-0.398381	4.31979			-0.608876	3.60527	1.57613	3.54295	-0.398381	4.31979		0.819398		0.963947	0.646602	0.638783
Q5N9Q7	10.4979	10.7295	4.9079	11.5555	11.0518	10.8259	3	3	6			1.81373	1.66456	-4.00502	2.21411	1.15156	2.13882		0.829626						3.79062	3.47426	-8.33654	4.64591	2.3238	4.31563			3.79062	3.47426	-8.33654	4.64591	2.3238	4.31563		0.0639489		4.119	1.445	0.367292
Q9SG11	7.46761	12.1519	10.3852	11.9965	12.1276	10.8244	3	3	6			-1.21652	3.08702	1.47229	2.65511	2.22737	2.13731		1.7271						-2.54248	6.44319	3.06461	5.57126	4.49477	4.31258			-2.54248	6.44319	3.06461	5.57126	4.49477	4.31258		0.0439385		2.4711	1.16546	0.445821
Q94DR2	9.81718	7.04166	9.17105	7.61861	9.70719	10.8231	3	3	6			1.13305	-2.02323	0.258128	-1.72283	-0.193078	2.13603		-0.0686538						2.36804	-4.22286	0.537299	-3.61505	-0.389626	4.31001			2.36804	-4.22286	0.537299	-3.61505	-0.389626	4.31001		0.843117		0.540951	0.206262	0.86678
A0A0P0V4R0	10.1007	10.4484	12.2091	10.7674	12.274	10.8215	3	3	6			1.41654	1.38354	3.29619	1.426	2.37371	2.13436		2.00506						2.96051	2.88771	6.8611	2.99221	4.79006	4.30663			2.96051	2.88771	6.8611	2.99221	4.79006	4.30663		0.286933		-0.206805	0.166321	0.891112
Q9C6G0	10.4113	10.4458	11.2881	12.9283	11.5616	10.8194	3	3	6			1.72718	1.38096	2.37519	3.58688	1.66136	2.13229		2.14397						3.60973	2.88231	4.94401	7.52641	3.35256	4.30245			3.60973	2.88231	4.94401	7.52641	3.35256	4.30245		0.371913		1.24846	1.2416	0.422905
Q8S6N5	11.2407	10.8503	11.9029	12.4037	11.6399	10.8175	3	3	6			2.55661	1.78546	2.99002	3.06229	1.73962	2.13045		2.37741						5.34321	3.72658	6.22378	6.42567	3.51049	4.29874			5.34321	3.72658	6.22378	6.42567	3.51049	4.29874		0.827297		-0.352892	0.373755	0.771771
P28752	11.5215	12.2338	11.3467	12.0846	13.3648	10.8166	3	3	6			2.83738	3.16891	2.43381	2.74314	3.46455	2.12949		2.79621						5.93001	6.61412	5.06603	5.75598	6.99136	4.2968			5.93001	6.61412	5.06603	5.75598	6.99136	4.2968		0.497147		-0.188673	0.244827	0.843917
Q5Z8V7	8.91597	10.7093	11.4791	11.454	11.7881	10.8043	3	3	6			0.231846	1.64446	2.5662	2.11255	1.88788	2.1172		1.76002						0.484549	3.43229	5.3416	4.43281	3.80969	4.272			0.484549	3.43229	5.3416	4.43281	3.80969	4.272		0.0343543		1.08536	0.933749	0.523496
Q8H063	9.92098	7.85947	8.53865	10.9868	8.52939	10.804	3	3	6			1.23685	-1.20541	-0.374269	1.6454	-1.37087	2.11688		0.341429						2.58498	-2.51593	-0.779049	3.45258	-2.76638	4.27135			2.58498	-2.51593	-0.779049	3.45258	-2.76638	4.27135		0.624518		1.88918	0.944366	0.519658
Q9FT70	11.0203	11.6711	11.444	12.1537	13.4493	10.801	3	3	6			2.33616	2.60617	2.53106	2.8123	3.54901	2.11389		2.6581						4.88249	5.43956	5.26845	5.90111	7.16179	4.26532			4.88249	5.43956	5.26845	5.90111	7.16179	4.26532		0.0743456		0.579243	0.90228	0.535041
Q1MX30	9.00037	10.7642	12.0542	11.5081	8.91316	10.7946	3	3	6			0.316243	1.69932	3.14124	2.1667	-0.987106	2.10748		1.40731						0.660936	3.5468	6.53856	4.54644	-1.99195	4.2524			0.660936	3.5468	6.53856	4.54644	-1.99195	4.2524		0.775513		-1.31313	0.610302	0.655059
Q2QSR8	8.84853	11.2486	7.6335	6.94989	8.74527	10.793	3	3	6			0.164406	2.18369	-1.27942	-2.39155	-1.15499	2.10594		-0.0619878						0.343602	4.55778	-2.66314	-5.01824	-2.33074	4.24929			0.343602	4.55778	-2.66314	-5.01824	-2.33074	4.24929		0.733152		-1.77931	0.657273	0.634076
Q6AV22	9.13558	9.00675	10.9631	10.3846	12.5092	10.7887	3	3	6			0.451458	-0.0581403	2.05019	1.04313	2.60892	2.10162		1.3662						0.943529	-0.12135	4.26751	2.18882	5.26471	4.24058			0.943529	-0.12135	4.26751	2.18882	5.26471	4.24058		0.637702		2.20147	2.05158	0.241219
B8YIE8	10.9577	10.6231	11.8885	12.1986	12.6019	10.7872	3	3	6			2.27356	1.55817	2.97559	2.85716	2.7016	2.10007		2.41103						4.75165	3.2522	6.19376	5.99524	5.45174	4.23745			4.75165	3.2522	6.19376	5.99524	5.45174	4.23745		0.544794		0.495607	0.633216	0.644738
Q6H676	11.2919	11.3084	10.7004	8.47946	10.137	10.7848	3	3	6			2.60774	2.24351	1.78752	-0.86198	0.236726	2.0977		1.35187						5.45007	4.68262	3.72075	-1.80871	0.477706	4.23267			5.45007	4.68262	3.72075	-1.80871	0.477706	4.23267		0.149335		-3.6506	3.09652	0.116911
Q5SML5	11.0533	10.6172	8.34185	11.5641	12.1294	10.7841	3	3	6			2.36919	1.5523	-0.571071	2.22262	2.22915	2.09697		1.64986						4.95152	3.23995	-1.1887	4.66376	4.49835	4.23118			4.95152	3.23995	-1.1887	4.66376	4.49835	4.23118		0.00944517		2.13017	1.45672	0.36432
Q6K8D9	7.98846	9.85465	9.1185	12.0935	10.5694	10.7841	3	3	6			-0.695666	0.789763	0.205576	2.75205	0.669116	2.09697		0.969634						-1.45391	1.64838	0.427912	5.77467	1.35025	4.23118			-1.45391	1.64838	0.427912	5.77467	1.35025	4.23118		0.652604		3.57791	3.53623	0.0861961
Q8LN68	6.17363	6.9507	11.9151	11.1356	9.69101	10.7828	3	3	6			-2.5105	-2.11419	3.00221	1.79414	-0.209254	2.09574		0.343026						-5.24684	-4.4127	6.24916	3.76469	-0.422268	4.22871			-5.24684	-4.4127	6.24916	3.76469	-0.422268	4.22871		0.275457		3.6605	1.28509	0.410345
Q9XHY7	10.9984	11.5881	8.9431	12.7351	11.7964	10.7815	3	3	6			2.31426	2.52322	0.0301774	3.39363	1.89614	2.09443		2.04198						4.83671	5.26643	0.0628148	7.12092	3.82635	4.22606			4.83671	5.26643	0.0628148	7.12092	3.82635	4.22606		0.558537		1.66913	1.17357	0.443324
Q8W3F9	11.247	10.1231	6.86419	11.0598	9.72763	10.78	3	3	6			2.56291	1.0582	-2.04874	1.71838	-0.172634	2.09295		0.868513						5.35639	2.20866	-4.26449	3.60571	-0.348369	4.22308			5.35639	2.20866	-4.26449	3.60571	-0.348369	4.22308		0.407248		1.39329	0.549382	0.683313
Q2R3K5	11.2118	11.1969	11.4988	12.2992	13.3828	10.78	3	3	6			2.5277	2.13202	2.58593	2.95777	3.48249	2.09287		2.6298						5.28281	4.44993	5.38266	6.20635	7.02756	4.22292			5.28281	4.44993	5.38266	6.20635	7.02756	4.22292		0.224036		0.780477	1.22807	0.426888
O55519	2.90412	8.72301	9.15307	11.0709	11.772	10.7797	3	3	6			-5.78001	-0.341875	0.240147	1.72942	1.87172	2.09263		-0.0313277						-12.08	-0.713557	0.499871	3.62888	3.77707	4.22242			-12.08	-0.713557	0.499871	3.62888	3.77707	4.22242		0.0039558		7.97401	2.43757	0.184594
Q9MAM4	9.27142	13.0314	9.31279	10.3507	12.2896	10.7788	3	3	6			0.587293	3.96649	0.399869	1.00928	2.38932	2.09172		1.74066						1.22742	8.2788	0.832335	2.11779	4.82157	4.2206			1.22742	8.2788	0.832335	2.11779	4.82157	4.2206		0.205983		0.273803	0.120622	0.919791
Q2RBJ6	9.16277	11.3824	11.3298	12.0455	10.4597	10.7725	3	3	6			0.478646	2.31747	2.41687	2.70402	0.559474	2.08539		1.76031						1.00035	4.83699	5.03077	5.67389	1.129	4.20781			1.00035	4.83699	5.03077	5.67389	1.129	4.20781		0.97973		0.0475296	0.0276876	0.980991
Q2QN26	10.2325	9.39004	7.94866	9.07323	8.98641	10.7714	3	3	6			1.54842	0.325153	-0.964264	-0.268206	-0.913854	2.08431		0.301926						3.23613	0.678655	-2.00714	-0.562782	-1.84413	4.20565			3.23613	0.678655	-2.00714	-0.562782	-1.84413	4.20565		0.806961		-0.0363047	0.0165778	0.988575
Q5Z974	8.94334	11.6516	10.5647	7.78156	10.4029	10.7704	3	3	6			0.259212	2.58675	1.6518	-1.55988	0.50264	2.08332		0.92064						0.541743	5.39903	3.43825	-3.27313	1.01431	4.20365			0.541743	5.39903	3.43825	-3.27313	1.01431	4.20365		0.595718		-2.47806	1.35094	0.392037
Q6H6N5	7.24945	9.12877	5.38678	9.05496	8.303	10.7684	3	3	6			-1.43468	0.0638806	-3.52615	-0.28648	-1.59726	2.08134		-0.783224						-2.99842	0.133331	-7.33975	-0.601127	-3.22322	4.19965			-2.99842	0.133331	-7.33975	-0.601127	-3.22322	4.19965		0.996934		3.52671	1.66878	0.31452
Q84TE6	7.86561	9.2521	8.96656	8.85209	9.84992	10.767	3	3	6			-0.818514	0.187211	0.0536397	-0.489345	-0.0503439	2.07993		0.16043						-1.71066	0.390744	0.111652	-1.0268	-0.101592	4.19681			-1.71066	0.390744	0.111652	-1.0268	-0.101592	4.19681		0.287128		1.42556	1.12537	0.458384
Q7F9I1	12.0348	11.1976	9.29907	12.9832	13.4106	10.7669	3	3	6			3.35064	2.1327	0.386147	3.64179	3.51032	2.07985		2.51691						7.00271	4.45134	0.803773	7.64163	7.08371	4.19664			7.00271	4.45134	0.803773	7.64163	7.08371	4.19664		0.520965		2.22139	1.5224	0.348105
P68560	7.87098	8.29531	7.81877	8.77146	9.1036	10.7669	3	3	6			-0.813142	-0.769577	-1.09415	-0.569981	-0.796662	2.07985		-0.327277						-1.69944	-1.60625	-2.2775	-1.196	-1.60764	4.19664			-1.69944	-1.60625	-2.2775	-1.196	-1.60764	4.19664		0.0248977		2.32539	1.55912	0.339358
Q852L0	9.30227	10.3024	8.89957	9.76102	11.121	10.7666	3	3	6			0.61815	1.23752	-0.0133551	0.419582	1.22075	2.07952		0.927028						1.29191	2.58294	-0.0277989	0.880417	2.46343	4.19597			1.29191	2.58294	-0.0277989	0.880417	2.46343	4.19597		0.765157		1.23092	1.43619	0.369543
Q9XIN7	7.50486	8.18864	9.33555	10.599	10.6908	10.7662	3	3	6			-1.17926	-0.876249	0.422623	1.25755	0.790519	2.0791		0.415713						-2.46462	-1.8289	0.879699	2.63873	1.59524	4.19514			-2.46462	-1.8289	0.879699	2.63873	1.59524	4.19514		0.703575		3.94764	4.78655	0.0362331
Q6H6V4	8.02697	7.8896	5.5544	11.5822	12.1033	10.7616	3	3	6			-0.657157	-1.17529	-3.35852	2.24075	2.20299	2.07446		0.221205						-1.37343	-2.45305	-6.99083	4.70181	4.44556	4.18576			-1.37343	-2.45305	-6.99083	4.70181	4.44556	4.18576		0.0148746		8.05015	4.57762	0.0418792
B9G2X9	11.9935	6.99435	10.7476	10.9041	10.777	10.7611	3	3	6			3.30938	-2.07053	1.83468	1.56267	0.876744	2.07396		1.26448						6.91648	-4.32159	3.81893	3.27898	1.76924	4.18476			6.91648	-4.32159	3.81893	3.27898	1.76924	4.18476		0.08465		0.93972	0.326699	0.797359
Q2QWE9	9.63158	9.11523	10.2262	10.8545	12.7249	10.7546	3	3	6			0.947454	0.0503387	1.31325	1.51304	2.82465	2.06746		1.4527						1.98014	0.105066	2.73355	3.17484	5.70006	4.17164			1.98014	0.105066	2.73355	3.17484	5.70006	4.17164		0.937866		2.74259	3.99308	0.0628006
A0A1P8BH03	10.4873	11.0547	9.64611	11.5078	10.393	10.7541	3	3	6			1.80321	1.98979	0.733185	2.16636	0.492696	2.06704		1.54205						3.76865	4.15306	1.52614	4.54571	0.994245	4.1708			3.76865	4.15306	1.52614	4.54571	0.994245	4.1708		0.691687		0.0876365	0.0696787	0.95285
Q6Z2T9	11.452	9.3149	12.2489	8.87928	10.6439	10.7536	3	3	6			2.76791	0.250013	3.33601	-0.46216	0.743591	2.06654		1.45032						5.78483	0.521825	6.94398	-0.96976	1.50054	4.16979			5.78483	0.521825	6.94398	-0.96976	1.50054	4.16979		0.721232		-2.85002	1.67565	0.313026
B9F2Y7	10.166	11.7939	10.7581	10.0464	12.2721	10.7517	3	3	6			1.48191	2.729	1.84522	0.705005	2.37187	2.06462		1.86627						3.09714	5.69594	3.84086	1.47933	4.78635	4.16591			3.09714	5.69594	3.84086	1.47933	4.78635	4.16591		0.733981		-0.734117	0.747184	0.595765
Q9SA27	9.8409	10.6162	9.68848	10.8584	10.3381	10.7482	3	3	6			1.15678	1.55129	0.775554	1.51693	0.437803	2.0611		1.24991						2.41763	3.23784	1.61433	3.18301	0.883472	4.15881			2.41763	3.23784	1.61433	3.18301	0.883472	4.15881		0.377964		0.318495	0.354072	0.782373
Q5N942	11.4033	11.5081	8.27342	11.9206	11.0809	10.7451	3	3	6			2.71921	2.44325	-0.639501	2.57914	1.18062	2.05799		1.72345						5.68304	5.09953	-1.33113	5.41186	2.38245	4.15254			5.68304	5.09953	-1.33113	5.41186	2.38245	4.15254		0.265226		0.831803	0.419567	0.747649
Q1AHB2	9.7987	9.06762	10.3729	10.4153	10.8217	10.7432	3	3	6			1.11458	0.00273548	1.45994	1.07388	0.921429	2.05606		1.10477						2.32942	0.00570946	3.0389	2.25335	1.85941	4.14864			2.32942	0.00570946	3.0389	2.25335	1.85941	4.14864		0.746155		0.962456	1.14488	0.452228
Q69T31	11.8071	11.1949	10.1945	11.8895	10.8637	10.7345	3	3	6			3.12295	2.12999	1.28159	2.54803	0.963457	2.04736		2.01556						6.52685	4.4457	2.66765	5.34658	1.94422	4.13109			6.52685	4.4457	2.66765	5.34658	1.94422	4.13109		0.886872		-0.739433	0.628656	0.646779
Q942F3	9.86019	9.78174	9.62646	16.9229	6.92029	10.7312	3	3	6			1.17606	0.71685	0.713534	7.58145	-2.97997	2.04414		1.54201						2.45793	1.4962	1.48524	15.9083	-6.01349	4.12459			2.45793	1.4962	1.48524	15.9083	-6.01349	4.12459		0.00516846		2.86001	0.52282	0.69601
Q9LWU9	9.98385	10.6031	11.0935	10.4608	10.3473	10.7311	3	3	6			1.29973	1.53818	2.18056	1.11933	0.447024	2.04397		1.43813						2.71638	3.21048	4.53888	2.3487	0.90208	4.12425			2.71638	3.21048	4.53888	2.3487	0.90208	4.12425		0.508668		-1.03024	1.34461	0.393762
Q6ENC1	10.0859	8.58928	9.11819	12.4273	13.3941	10.7309	3	3	6			1.40175	-0.47561	0.205265	3.08585	3.4938	2.0438		1.62581						2.9296	-0.992688	0.427263	6.4751	7.05037	4.1239			2.9296	-0.992688	0.427263	6.4751	7.05037	4.1239		0.757413		5.09506	5.33149	0.0248348
Q0J032	11.2266	9.96651	10.7462	11.1036	12.3773	10.7277	3	3	6			2.54247	0.901618	1.83325	1.76211	2.47708	2.04057		1.92618						5.31366	1.88185	3.81596	3.69748	4.99867	4.11739			5.31366	1.88185	3.81596	3.69748	4.99867	4.11739		0.259327		0.600688	0.730285	0.602785
Q0DKN3	10.1616	10.547	9.55244	10.9012	9.41085	10.7266	3	3	6			1.47751	1.4821	0.639515	1.55973	-0.489411	2.03946		1.11815						3.08794	3.09343	1.33116	3.27281	-0.987615	4.11516			3.08794	3.09343	1.33116	3.27281	-0.987615	4.11516		0.242387		-0.370728	0.257378	0.836607
A7LFZ6	10.2262	11.0395	11.0042	10.2066	11.4057	10.7252	3	3	6			1.54205	1.97465	2.09123	0.865211	1.50546	2.0381		1.66945						3.22282	4.12146	4.35293	1.81549	3.03797	4.1124			3.22282	4.12146	4.35293	1.81549	3.03797	4.1124		0.424981		-0.91045	1.78455	0.290267
Q0DXB1	9.73222	7.37808	5.81414	9.40652	8.90114	10.7212	3	3	6			1.0481	-1.68681	-3.09878	0.0650867	-0.999127	2.03409		-0.439574						2.19048	-3.52069	-6.45018	0.136573	-2.0162	4.10431			2.19048	-3.52069	-6.45018	0.136573	-2.0162	4.10431		0.66596		3.33502	1.54179	0.343459
F4KBP5	11.5168	12.1421	10.5972	12.0492	13.7101	10.72	3	3	6			2.83266	3.07719	1.68429	2.70776	3.80979	2.03289		2.69076						5.92015	6.42267	3.50589	5.68176	7.68803	4.1019			5.92015	6.42267	3.50589	5.68176	7.68803	4.1019		0.858917		0.540991	0.48637	0.713819
Q65XK7	9.97039	10.1494	10.4875	10.4895	8.12019	10.719	3	3	6			1.28627	1.08448	1.57462	1.14811	-1.78008	2.03187		0.890877						2.68826	2.26351	3.27759	2.4091	-3.59214	4.09982			2.68826	2.26351	3.27759	2.4091	-3.59214	4.09982		0.0312481		-1.77086	0.921411	0.527992
Q6K7R9	10.3474	11.268	12.3339	10.702	12.6633	10.7132	3	3	6			1.66328	2.20313	3.42101	1.36056	2.76307	2.02612		2.23953						3.47618	4.59834	7.12091	2.85489	5.57579	4.08823			3.47618	4.59834	7.12091	2.85489	5.57579	4.08823		0.695122		-0.892177	0.888132	0.540313
Q8LMR2	11.1372	10.4097	10.4052	12.0689	12.9767	10.7128	3	3	6			2.45312	1.34482	1.49232	2.72751	3.07646	2.02569		2.18666						5.12694	2.8069	3.1063	5.72318	6.2082	4.08736			5.12694	2.8069	3.1063	5.72318	6.2082	4.08736		0.873494		1.65954	2.62108	0.162546
Q5Z8T8	10.0081	8.85661	8.56388	7.44402	5.77587	10.7125	3	3	6			1.32403	-0.208275	-0.349041	-1.89742	-4.1244	2.02543		-0.538279						2.76716	-0.434709	-0.726536	-3.98139	-8.3229	4.08684			2.76716	-0.434709	-0.726536	-3.98139	-8.3229	4.08684		0.173082		-3.27445	1.1913	0.437909
Q948R0	8.50692	10.0254	6.41441	9.86118	10.3397	10.7094	3	3	6			-0.177201	0.960529	-2.49852	0.519743	0.439474	2.02233		0.21106						-0.370343	2.00481	-5.20072	1.09059	0.886844	4.08059			-0.370343	2.00481	-5.20072	1.09059	0.886844	4.08059		0.383345		3.20809	2.02756	0.24527
Q5QNM6	9.65807	10.5863	6.34658	10.2256	9.49211	10.7093	3	3	6			0.973945	1.52139	-2.56634	0.884132	-0.408151	2.02225		0.404537						2.03551	3.17543	-5.34189	1.85519	-0.823636	4.08042			2.03551	3.17543	-5.34189	1.85519	-0.823636	4.08042		0.439988		1.74764	0.751166	0.594123
Q6YYC0	10.2708	10.2241	10.0076	10.8691	10.8569	10.7082	3	3	6			1.58664	1.15924	1.09466	1.52769	0.956627	2.02113		1.391						3.31602	2.41954	2.27857	3.20559	1.93044	4.07816			3.31602	2.41954	2.27857	3.20559	1.93044	4.07816		0.426936		0.400021	0.737321	0.599852
Q7F2E4	9.92169	11.4572	9.9634	9.99831	12.5009	10.7058	3	3	6			1.23757	2.39229	1.05048	0.656871	2.6006	2.01871		1.65942						2.58647	4.99316	2.18659	1.37833	5.24793	4.07328			2.58647	4.99316	2.18659	1.37833	5.24793	4.07328		0.738616		0.311105	0.251923	0.839776
Q9SQV1	10.6651	8.63652	4.98805	9.46087	10.5604	10.7055	3	3	6			1.98095	-0.428371	-3.92488	0.119428	0.660163	2.01837		0.0709428						4.1401	-0.894091	-8.16971	0.250599	1.33219	4.07258			4.1401	-0.894091	-8.16971	0.250599	1.33219	4.07258		0.184018		3.52636	1.32103	0.40025
P92943	10.8435	12.6373	10.6833	11.0449	11.1573	10.705	3	3	6			2.15933	3.57244	1.77042	1.70344	1.25708	2.01793		2.08011						4.51291	7.45635	3.68517	3.57435	2.53675	4.07171			4.51291	7.45635	3.68517	3.57435	2.53675	4.07171		0.270089		-1.82387	2.2352	0.212392
C0SQ89	12.1829	10.1358	9.32879	11.5458	11.3061	10.703	3	3	6			3.49877	1.07095	0.415864	2.20435	1.40585	2.01586		1.76861						7.31229	2.23527	0.865629	4.62543	2.83697	4.06752			7.31229	2.23527	0.865629	4.62543	2.83697	4.06752		0.135356		0.37224	0.211763	0.863482
Q6Z517	9.41113	11.7581	10.0542	11.7151	10.1683	10.6946	3	3	6			0.727006	2.69317	1.14127	2.37362	0.268031	2.00753		1.5351						1.51942	5.62115	2.37559	4.98062	0.540878	4.05071			1.51942	5.62115	2.37559	4.98062	0.540878	4.05071		0.921227		0.0186852	0.0110257	0.992387
Q6Z9D2	11.3073	11.576	8.82645	10.8069	11.5402	10.6943	3	3	6			2.62313	2.51108	-0.0864703	1.46543	1.63991	2.00718		1.69338						5.48225	5.24109	-0.17999	3.07495	3.30929	4.05001			5.48225	5.24109	-0.17999	3.07495	3.30929	4.05001		0.049295		-0.0363693	0.0200682	0.986186
Q9C8S9	9.25595	11.5243	10.7011	10.1505	13.0718	10.6909	3	3	6			0.571826	2.45946	1.78821	0.809072	3.17152	2.00378		1.80064						1.19509	5.13335	3.7222	1.69769	6.40002	4.04315			1.19509	5.13335	3.7222	1.69769	6.40002	4.04315		0.837344		0.696736	0.482984	0.715496
Q5ZAY9	10.7398	10.7597	8.3658	9.46099	11.2368	10.6903	3	3	6			2.05566	1.69483	-0.547126	0.119551	1.33653	2.00325		1.11045						4.29625	3.53744	-1.13885	0.250856	2.69707	4.04209			4.29625	3.53744	-1.13885	0.250856	2.69707	4.04209		0.59788		0.0983943	0.0534056	0.963659
Q6YU88	10.1803	12.3098	10.1982	9.74376	10.7486	10.6854	3	3	6			1.49616	3.24493	1.28528	0.40232	0.848347	1.99836		1.5459						3.12691	6.77278	2.67533	0.844196	1.71194	4.03221			3.12691	6.77278	2.67533	0.844196	1.71194	4.03221		0.699792		-1.99556	1.82317	0.2826
O23193	5.00863	11.5415	7.76242	9.63223	5.13722	10.6853	3	3	6			-3.67549	2.4766	-1.15051	0.290795	-4.76305	1.99818		-0.803913						-7.68164	5.16912	-2.39481	0.61018	-9.61168	4.03185			-7.68164	5.16912	-2.39481	0.61018	-9.61168	4.03185		0.905845		-0.0207732	0.00406221	0.997188
Q7XU29	8.92493	9.02201	11.1989	9.68289	12.2004	10.684	3	3	6			0.240808	-0.04288	2.28601	0.341452	2.30017	1.99687		1.18707						0.503279	-0.0894986	4.75838	0.716476	4.64168	4.0292			0.503279	-0.0894986	4.75838	0.716476	4.64168	4.0292		0.778758		1.40506	0.966246	0.511836
Q94DM8	10.3194	4.61871	11.1328	11.5752	4.69427	10.6828	3	3	6			1.63532	-4.44618	2.2199	2.23372	-5.206	1.99573		-0.261251						3.41776	-9.28001	4.62076	4.68707	-10.5055	4.0269			3.41776	-9.28001	4.62076	4.68707	-10.5055	4.0269		0.891614		-0.183362	0.0300979	0.979354
Q0D598	10.7509	11.9411	9.719	10.9743	10.4934	10.679	3	3	6			2.06675	2.8762	0.806072	1.63283	0.59309	1.99195		1.66115						4.31943	6.00316	1.67786	3.42621	1.19684	4.01927			4.31943	6.00316	1.67786	3.42621	1.19684	4.01927		0.635649		-1.11938	0.990244	0.503393
F4IE66	8.74692	10.6413	6.03538	10.9767	11.9608	10.6755	3	3	6			0.0627941	1.57644	-2.87754	1.63527	2.0605	1.98842		0.740981						0.131237	3.29033	-5.98966	3.43132	4.15802	4.01216			0.131237	3.29033	-5.98966	3.43132	4.15802	4.01216		0.0131906		4.7232	2.1555	0.224456
Q69NX5	9.17597	7.9308	9.21885	11.5957	10.6668	10.6698	3	3	6			0.49185	-1.13409	0.30593	2.25424	0.766492	1.98268		0.77785						1.02795	-2.36706	0.6368	4.73012	1.54676	4.00057			1.02795	-2.36706	0.6368	4.73012	1.54676	4.00057		0.892616		3.65992	3.96531	0.064021
Q336R3	10.3981	11.7371	9.11782	11.6656	11.492	10.6667	3	3	6			1.71398	2.67223	0.204901	2.32412	1.59169	1.97957		1.74775						3.58215	5.57745	0.426507	4.87675	3.21198	3.99431			3.58215	5.57745	0.426507	4.87675	3.21198	3.99431		0.186505		0.832307	0.677879	0.625083
Q851W5	6.29719	6.83668	7.06889	9.77867	10.6354	10.6667	3	3	6			-2.38693	-2.22821	-1.84404	0.437231	0.73509	1.97957		-0.551213						-4.9886	-4.65068	-3.8384	0.917451	1.48339	3.99431			-4.9886	-4.65068	-3.8384	0.917451	1.48339	3.99431		0.230571		6.62428	8.50821	0.00274646
Q6L506	10.5133	12.1259	10.8789	10.4309	11.8307	10.6656	3	3	6			1.82921	3.06104	1.96597	1.08943	1.93045	1.97851		1.97577						3.82298	6.38897	4.09221	2.28598	3.89558	3.99216			3.82298	6.38897	4.09221	2.28598	3.89558	3.99216		0.631905		-1.37681	2.09244	0.234484
A2ZNT5	10.7762	7.61176	11.7403	9.22277	12.334	10.6644	3	3	6			2.09206	-1.45312	2.82741	-0.118666	2.4337	1.97735		1.29312						4.37233	-3.03294	5.8853	-0.249	4.91113	3.98983			4.37233	-3.03294	5.8853	-0.249	4.91113	3.98983		0.499088		0.475755	0.170818	0.888339
Q8LNU5	8.75779	10.5138	11.1068	8.5889	9.36221	10.6627	3	3	6			0.0736667	1.44894	2.1939	-0.752535	-0.538058	1.97557		0.733581						0.153961	3.02421	4.56665	-1.57906	-1.08578	3.98624			0.153961	3.02421	4.56665	-1.57906	-1.08578	3.98624		0.691465		-2.14114	1.37587	0.385321
F4INA9	11.6706	10.7608	10.9544	11.0169	12.7521	10.6602	3	3	6			2.98649	1.69592	2.04149	1.67551	2.85182	1.97308		2.20405						6.24165	3.5397	4.24941	3.51576	5.75489	3.98121			6.24165	3.5397	4.24941	3.51576	5.75489	3.98121		0.831412		-0.259633	0.289426	0.818227
Q69SA9	9.67147	6.34914	8.77571	7.11645	9.44317	10.6594	3	3	6			0.987347	-2.71575	-0.137214	-2.22499	-0.457094	1.97228		-0.429237						2.06352	-5.66828	-0.285615	-4.66874	-0.9224	3.97959			2.06352	-5.66828	-0.285615	-4.66874	-0.9224	3.97959		0.91027		0.75961	0.262249	0.833787
Q6YXZ4	9.38063	8.94834	9.86197	8.66534	11.7985	10.659	3	3	6			0.696511	-0.116549	0.949047	-0.676101	1.89825	1.97192		0.787179						1.45568	-0.24326	1.97546	-1.41868	3.8306	3.97887			1.45568	-0.24326	1.97546	-1.41868	3.8306	3.97887		0.249401		1.06764	0.728199	0.603657
Q7PC69	8.0468	9.70941	9.90176	10.6171	12.4025	10.6571	3	3	6			-0.637327	0.644524	0.988833	1.27566	2.50227	1.97005		1.124						-1.33199	1.34524	2.05828	2.67675	5.04949	3.97508			-1.33199	1.34524	2.05828	2.67675	5.04949	3.97508		0.61288		3.20993	4.04313	0.0606593
F4IDQ6	6.48882	11.7042	11.4262	11.9453	13.055	10.6568	3	3	6			-2.1953	2.63936	2.51329	2.6039	3.15478	1.96969		1.78095						-4.5881	5.50885	5.23146	5.46381	6.36624	3.97436			-4.5881	5.50885	5.23146	5.46381	6.36624	3.97436		0.0844962		3.2174	1.33396	0.396677
Q7G8Y3	12.0853	12.6338	12.4626	11.2939	12.3554	10.6566	3	3	6			3.40118	3.56895	3.54963	1.95249	2.45509	1.96951		2.81614						7.10834	7.44907	7.38863	4.09696	4.95428	3.974			7.10834	7.44907	7.38863	4.09696	4.95428	3.974		0.207716		-2.9736	10.2903	0.000798555
Q5Z8P0	10.3578	8.65274	7.48261	10.6428	11.8103	10.6557	3	3	6			1.67365	-0.41215	-1.43032	1.30134	1.90999	1.96862		0.835187						3.49786	-0.860234	-2.97724	2.73062	3.85429	3.9722			3.49786	-0.860234	-2.97724	2.73062	3.85429	3.9722		0.082617		3.63224	2.8837	0.135494
Q6H6R9	10.2501	9.10899	10.1729	10.0488	11.4205	10.6519	3	3	6			1.56594	0.0441077	1.26	0.707322	1.52027	1.96485		1.17708						3.27275	0.0920611	2.62272	1.48419	3.06786	3.96461			3.27275	0.0920611	2.62272	1.48419	3.06786	3.96461		0.716797		0.843041	0.93031	0.524745
Q0JA29	6.70155	9.95989	5.53947	10.6428	11.7242	10.6484	3	3	6			-1.98257	0.894999	-3.37345	1.30134	1.82395	1.96135		0.104268						-4.1435	1.86803	-7.02192	2.73062	3.68067	3.95755			-4.1435	1.86803	-7.02192	2.73062	3.68067	3.95755		0.0394571		6.55541	2.98112	0.126647
Q8S0J7	9.488	10.6593	11.0553	11.6466	10.2149	10.6431	3	3	6			0.803878	1.5944	2.14236	2.30521	0.314661	1.95604		1.51942						1.68007	3.3278	4.45937	4.83707	0.634976	3.94683			1.68007	3.3278	4.45937	4.83707	0.634976	3.94683		0.56978		-0.0161233	0.0115861	0.992001
Q10GB1	8.6761	9.56211	8.6222	8.93834	10.7515	10.6419	3	3	6			-0.00802514	0.497222	-0.290725	-0.403093	0.851279	1.95478		0.433572						-0.0167722	1.0378	-0.605151	-0.845817	1.71785	3.94428			-0.0167722	1.0378	-0.605151	-0.845817	1.71785	3.94428		0.21524		1.46681	1.42133	0.373369
Q2QQS5	8.75882	9.06854	9.12435	11.6887	11.8145	10.6402	3	3	6			0.0746996	0.00364936	0.211431	2.34725	1.91428	1.95306		1.08406						0.156119	0.0076169	0.440097	4.92528	3.86295	3.94081			0.156119	0.0076169	0.440097	4.92528	3.86295	3.94081		0.242099		4.04174	11.3736	0.000376879
A0A178VEK7	10.3466	9.37886	5.375	8.53695	8.10177	10.6341	3	3	6			1.6625	0.313971	-3.53792	-0.804491	-1.7985	1.94699		-0.369574						3.47456	0.655317	-7.36425	-1.68808	-3.62931	3.92856			3.47456	0.655317	-7.36425	-1.68808	-3.62931	3.92856		0.655165		0.615182	0.177797	0.884052
Q2R224	10.785	11.1877	11.8059	9.15038	11.6237	10.6324	3	3	6			2.10092	2.12277	2.89298	-0.191055	1.72343	1.94527		1.76572						4.39084	4.43063	6.0218	-0.400895	3.47783	3.92508			4.39084	4.43063	6.0218	-0.400895	3.47783	3.92508		0.265296		-2.61375	2.72696	0.151044
Q0J7E4	8.96812	10.8289	9.64915	11.1612	11.6827	10.6319	3	3	6			0.283996	1.76396	0.736225	1.81976	1.78247	1.94481		1.38854						0.593541	3.68172	1.53247	3.81843	3.59696	3.92417			0.593541	3.68172	1.53247	3.81843	3.59696	3.92417		0.0220051		1.84394	2.47496	0.179872
Q8RZX9	10.713	10.9968	10.4114	11.2361	10.4361	10.6306	3	3	6			2.02883	1.93194	1.49848	1.89464	0.535822	1.94354		1.63888						4.24018	4.03232	3.11912	3.97555	1.08127	3.9216			4.24018	4.03232	3.11912	3.97555	1.08127	3.9216		0.229687		-0.804402	1.08062	0.472826
Q10F39	9.82478	7.93805	9.82281	11.6488	11.315	10.6304	3	3	6			1.14066	-1.12684	0.909886	2.30732	1.41471	1.94336		1.09818						2.38394	-2.35192	1.89395	4.8415	2.85485	3.92123			2.38394	-2.35192	1.89395	4.8415	2.85485	3.92123		0.254398		3.23054	3.11824	0.115164
Q7Y0D4	10.8346	7.63858	11.0446	10.2186	11.1461	10.6276	3	3	6			2.15043	-1.42631	2.13168	0.877126	1.24579	1.94053		1.15321						4.49431	-2.97697	4.43713	1.84049	2.51397	3.91553			4.49431	-2.97697	4.43713	1.84049	2.51397	3.91553		0.114431		0.771842	0.362809	0.777649
Q6YUU5	10.9592	10.269	10.7017	10.0553	10.4394	10.6244	3	3	6			2.27508	1.20412	1.78882	0.713845	0.53915	1.93734		1.40973						4.75483	2.51323	3.72346	1.49788	1.08799	3.90908			4.75483	2.51323	3.72346	1.49788	1.08799	3.90908		0.702827		-1.49886	2.04644	0.24208
A2ZVG7	10.1038	9.10701	8.88972	8.91579	10.2386	10.6241	3	3	6			1.41969	0.0421207	-0.0232066	-0.425647	0.338379	1.93697		0.548051						2.9671	0.0879138	-0.048305	-0.893144	0.682837	3.90835			2.9671	0.0879138	-0.048305	-0.893144	0.682837	3.90835		0.652417		0.230445	0.152043	0.899975
O81914	7.55075	7.15573	10.4081	8.46041	9.52564	10.622	3	3	6			-1.13338	-1.90916	1.49519	-0.881022	-0.374627	1.93487		-0.144687						-2.36871	-3.98477	3.11228	-1.84867	-0.755985	3.9041			-2.36871	-3.98477	3.11228	-1.84867	-0.755985	3.9041		0.805674		1.51355	0.701433	0.614961
Q6J2K5	9.9174	10.1137	9.48204	10.0686	10.3472	10.6188	3	3	6			1.23328	1.04886	0.569118	0.727207	0.446913	1.93175		0.992854						2.57751	2.18916	1.18463	1.52591	0.901857	3.89781			2.57751	2.18916	1.18463	1.52591	0.901857	3.89781		0.342708		0.124763	0.140883	0.906964
Q657W3	9.19579	8.66384	10.0352	11.4584	12.2229	10.6185	3	3	6			0.511667	-0.401044	1.12229	2.11697	2.32268	1.93138		1.26732						1.06936	-0.837055	2.33607	4.44208	4.68709	3.89707			1.06936	-0.837055	2.33607	4.44208	4.68709	3.89707		0.120475		3.48596	5.53984	0.0214953
Q5Z880	8.63749	8.94462	8.47358	9.35793	5.01917	10.6184	3	3	6			-0.0466289	-0.120263	-0.439339	0.0164886	-4.8811	1.93129		-0.589925						-0.0974527	-0.251011	-0.914494	0.0345984	-9.84989	3.89689			-0.0974527	-0.251011	-0.914494	0.0345984	-9.84989	3.89689		0.0074744		-1.55182	0.431903	0.741283
Q652J4	7.04636	8.93996	7.59597	9.08311	10.0556	10.6152	3	3	6			-1.63776	-0.124926	-1.31696	-0.25833	0.155289	1.92808		-0.209102						-3.42286	-0.260744	-2.74127	-0.542059	0.313367	3.8904			-3.42286	-0.260744	-2.74127	-0.542059	0.313367	3.8904		0.667464		3.3622	3.14183	0.113296
Q6F6A2	8.35363	7.89766	4.1589	10.0959	5.59467	10.6145	3	3	6			-0.330491	-1.16722	-4.75402	0.754487	-4.3056	1.92743		-1.31257						-0.690714	-2.43621	-9.8956	1.58316	-8.68855	3.8891			-0.690714	-2.43621	-9.8956	1.58316	-8.68855	3.8891		0.695463		3.26874	0.909985	0.532191
Q852Q1	10.815	11.3588	10.9179	11.4171	10.9474	10.6142	3	3	6			2.13086	2.29387	2.00497	2.07568	1.04715	1.92716		1.91328						4.45342	4.78775	4.17339	4.35543	2.11312	3.88854			4.45342	4.78775	4.17339	4.35543	2.11312	3.88854		0.126622		-1.01915	2.16994	0.22222
Q8L4P8	10.3313	10.1049	10.0572	12.1227	10.3673	10.6124	3	3	6			1.64713	1.03997	1.14426	2.78129	0.467041	1.92531		1.50083						3.44244	2.17062	2.38179	5.83604	0.942473	3.88483			3.44244	2.17062	2.38179	5.83604	0.942473	3.88483		0.142202		0.889496	0.787931	0.579174
Q2QXB2	10.0456	10.4867	9.80113	11.4682	9.05677	10.6103	3	3	6			1.3615	1.42185	0.888203	2.12678	-0.843492	1.92319		1.14634						2.84548	2.96766	1.84881	4.46266	-1.70214	3.88055			2.84548	2.96766	1.84881	4.46266	-1.70214	3.88055		0.0629817		-0.340296	0.196025	0.872952
Q42997	7.73532	10.0496	11.4358	13.7393	12.1153	10.61	3	3	6			-0.948804	0.984689	2.52285	4.39782	2.21507	1.92292		1.84909						-1.98296	2.05523	5.25137	9.22802	4.46994	3.87999			-1.98296	2.05523	5.25137	9.22802	4.46994	3.87999		0.790957		4.08477	2.29492	0.203779
X5HYT8	8.82276	10.1132	11.1148	11.1745	11.7949	10.6087	3	3	6			0.138639	1.04833	2.20193	1.83305	1.89468	1.92162		1.50638						0.28975	2.18807	4.58335	3.84633	3.8234	3.87738			0.28975	2.18807	4.58335	3.84633	3.8234	3.87738		0.000317015		1.49531	1.50705	0.35183
Q5VQ09	10.8412	12.6912	11.3827	12.6503	11.7695	10.6076	3	3	6			2.15705	3.62631	2.46975	3.30887	1.86928	1.92051		2.55863						4.50815	7.56879	5.14085	6.94307	3.77215	3.87514			4.50815	7.56879	5.14085	6.94307	3.77215	3.87514		0.891441		-0.875806	0.824247	0.564777
P31691	11.7371	11.8264	10.6619	10.5169	11.9637	10.6073	3	3	6			3.053	2.7615	1.74894	1.17544	2.06346	1.92024		2.12043						6.38065	5.76377	3.64046	2.46646	4.164	3.87458			6.38065	5.76377	3.64046	2.46646	4.164	3.87458		0.570537		-1.75995	2.76157	0.147464
Q336N8	9.7199	10.6304	8.22371	10.195	12.112	10.6003	3	3	6			1.03578	1.56556	-0.689211	0.853566	2.21175	1.91319		1.14844						2.16474	3.26762	-1.43461	1.79105	4.46324	3.86036			2.16474	3.26762	-1.43461	1.79105	4.46324	3.86036		0.490385		2.03897	1.83551	0.280192
Q5SML4	9.92581	9.93508	10.0023	11.7199	10.9892	10.5975	3	3	6			1.24168	0.87019	1.08933	2.37846	1.08892	1.9104		1.42983						2.59507	1.81625	2.26746	4.99078	2.1974	3.85473			2.59507	1.81625	2.26746	4.99078	2.1974	3.85473		0.143831		1.45471	2.65228	0.159069
Q53K16	5.80614	10.7198	3.96227	9.86705	11.4243	10.5966	3	3	6			-2.87798	1.65493	-4.95065	0.52561	1.52406	1.90947		-0.369094						-6.01487	3.45415	-10.3049	1.1029	3.0755	3.85285			-6.01487	3.45415	-10.3049	1.1029	3.0755	3.85285		0.0779336		6.96562	2.57129	0.168254
P41344	6.99356	9.28875	10.1167	5.71375	13.5522	10.5947	3	3	6			-1.69056	0.223864	1.20381	-3.62769	3.65192	1.9076		0.278159						-3.53321	0.467245	2.50576	-7.61204	7.36946	3.84909			-3.53321	0.467245	2.50576	-7.61204	7.36946	3.84909		0.266596		1.38891	0.341621	0.789154
Q8H0U8	9.09866	11.9744	10.5263	11.5213	11.917	10.5887	3	3	6			0.414541	2.90949	1.61338	2.17987	2.0167	1.90162		1.83927						0.866374	6.07266	3.35828	4.57406	4.06963	3.83702			0.866374	6.07266	3.35828	4.57406	4.06963	3.83702		0.041016		0.727798	0.561824	0.677445
Q8LKW0	11.623	11.2465	11.8038	10.5778	11.9898	10.5876	3	3	6			2.93889	2.18162	2.89088	1.23637	2.08952	1.9005		2.2063						6.14217	4.55344	6.01744	2.5943	4.21658	3.83475			6.14217	4.55344	6.01744	2.5943	4.21658	3.83475		0.959268		-2.02247	4.44492	0.045914
Q0JGK4	9.34263	9.01201	8.77893	10.0768	10.8542	10.5829	3	3	6			0.658507	-0.0528772	-0.133992	0.735378	0.95398	1.8958		0.676133						1.37625	-0.110365	-0.278907	1.54306	1.9251	3.82528			1.37625	-0.110365	-0.278907	1.54306	1.9251	3.82528		0.714044		2.10215	3.73135	0.0752928
Q6ASW7	6.11364	9.86037	9.99251	11.1145	12.5135	10.5805	3	3	6			-2.57049	0.795486	1.07959	1.77309	2.61322	1.89345		0.930723						-5.37222	1.66033	2.24719	3.7205	5.27338	3.82053			-5.37222	1.66033	2.24719	3.7205	5.27338	3.82053		0.0806532		4.7597	2.94879	0.129516
Q10JL1	6.36315	9.50448	6.50163	8.67613	8.34886	10.5788	3	3	6			-2.32097	0.439594	-2.41129	-0.665304	-1.5514	1.89166		-0.76962						-4.85074	0.917516	-5.01916	-1.39602	-3.13068	3.81691			-4.85074	0.917516	-5.01916	-1.39602	-3.13068	3.81691		0.932601		2.74753	1.35559	0.390776
Q7G764	8.40348	10.5242	8.94442	10.4499	10.9118	10.5729	3	3	6			-0.280642	1.45936	0.0314958	1.10843	1.01158	1.8858		0.869337						-0.586532	3.04596	0.0655591	2.32585	2.04133	3.80509			-0.586532	3.04596	0.0655591	2.32585	2.04133	3.80509		0.385895		1.88243	2.28659	0.20496
F4K493	10.5752	10.289	10.8693	9.5129	11.3861	10.5719	3	3	6			1.89104	1.22409	1.95636	0.171461	1.48587	1.88485		1.43561						3.9522	2.55491	4.07221	0.35978	2.99843	3.80318			3.9522	2.55491	4.07221	0.35978	2.99843	3.80318		0.359704		-1.13931	1.40626	0.377287
A2ZP58	11.8057	10.6338	9.56761	10.9914	9.82717	10.5699	3	3	6			3.12162	1.56893	0.65469	1.64994	-0.073097	1.88276		1.46747						6.52407	3.27464	1.36275	3.46211	-0.147507	3.79897			6.52407	3.27464	1.36275	3.46211	-0.147507	3.79897		0.825561		-1.3493	0.91533	0.530223
Q84R43	10.2651	10.5055	10.0116	10.9416	11.773	10.5685	3	3	6			1.58102	1.44063	1.09872	1.60012	1.87275	1.88143		1.57911						3.30428	3.00686	2.28702	3.35757	3.77915	3.79628			3.30428	3.00686	2.28702	3.35757	3.77915	3.79628		0.36829		0.778284	3.63602	0.0804359
Q0JAD9	8.30177	11.384	10.6347	8.69251	11.1821	10.5676	3	3	6			-0.382353	2.31914	1.7218	-0.648926	1.28182	1.88048		1.02866						-0.799103	4.84048	3.58396	-1.36165	2.58667	3.79437			-0.799103	4.84048	3.58396	-1.36165	2.58667	3.79437		0.90686		-0.868652	0.461522	0.72622
Q5JLS2	11.2524	11.3243	10.5613	10.6442	10.2319	10.5661	3	3	6			2.56831	2.25946	1.64836	1.30278	0.331676	1.87906		1.66494						5.36766	4.71592	3.43111	2.73365	0.669312	3.79149			5.36766	4.71592	3.43111	2.73365	0.669312	3.79149		0.556046		-2.10675	3.02807	0.122591
Q9LGV5	10.6051	9.16912	11.4192	11.1527	11.6796	10.5661	3	3	6			1.92099	0.104236	2.50625	1.81123	1.7793	1.87896		1.66683						4.01479	0.21756	5.21681	3.80053	3.59058	3.79129			4.01479	0.21756	5.21681	3.80053	3.59058	3.79129		0.00412578		0.577751	0.437517	0.738404
Q944S1	7.10098	10.6294	9.40146	8.33691	11.7023	10.5655	3	3	6			-1.58315	1.56456	0.488532	-1.00453	1.80204	1.87839		0.524307						-3.30871	3.26553	1.01689	-2.10782	3.63645	3.79014			-3.30871	3.26553	1.01689	-2.10782	3.63645	3.79014		0.993929		1.44835	0.678926	0.62463
Q6YSJ5	8.9663	11.0723	11.326	16.3147	11.4028	10.5654	3	3	6			0.28218	2.00738	2.41306	6.97322	1.50253	1.87829		2.50944						0.589746	4.18978	5.02283	14.632	3.03206	3.78995			0.589746	4.18978	5.02283	14.632	3.03206	3.78995		0.232919		3.8839	1.37691	0.385042
Q6ER94	10.936	10.3311	11.2286	10.8852	13.1224	10.5652	3	3	6			2.25185	1.26625	2.31571	1.54373	3.22217	1.8781		2.07964						4.70628	2.64291	4.82021	3.23923	6.50224	3.78957			4.70628	2.64291	4.82021	3.23923	6.50224	3.78957		0.659675		0.453878	0.451595	0.731234
Q7XKU5	5.53767	8.20477	9.40659	8.87452	8.71163	10.56	3	3	6			-3.14645	-0.86012	0.493664	-0.466917	-1.18863	1.87286		-0.549267						-6.57597	-1.79523	1.02757	-0.979741	-2.39862	3.77898			-6.57597	-1.79523	1.02757	-0.979741	-2.39862	3.77898		0.82955		2.58142	1.23855	0.4238
Q3E9C3	9.03477	9.26976	12.3872	12.5796	12.6907	10.5568	3	3	6			0.350648	0.204871	3.47431	3.23811	2.79039	1.8697		1.98801						0.732841	0.427604	7.23186	6.7946	5.63091	3.77261			0.732841	0.427604	7.23186	6.7946	5.63091	3.77261		0.271817		2.60194	1.56928	0.336977
Q7FAZ2	6.66888	7.78692	10.8223	6.15532	8.71829	10.555	3	3	6			-2.01524	-1.27796	1.90933	-3.18611	-1.18197	1.86788		-0.647347						-4.21177	-2.66735	3.97431	-6.68548	-2.38518	3.76893			-4.21177	-2.66735	3.97431	-6.68548	-2.38518	3.76893		0.813189		-0.798972	0.235938	0.849133
Q8VZI2	6.55536	6.60503	6.23187	8.72496	7.8346	10.5549	3	3	6			-2.12877	-2.45985	-2.68105	-0.61648	-2.06567	1.86778		-1.34734						-4.44904	-5.13417	-5.58066	-1.29357	-4.16845	3.76874			-4.44904	-5.13417	-5.58066	-1.29357	-4.16845	3.76874		0.0394438		4.4902	2.3924	0.190466
Q0DRX6	11.542	9.01901	11.9715	10.8739	10.0282	10.5541	3	3	6			2.85784	-0.0458802	3.05858	1.53247	0.127917	1.86702		1.56632						5.97279	-0.0957607	6.36651	3.21561	0.258133	3.76719			5.97279	-0.0957607	6.36651	3.21561	0.258133	3.76719		0.426829		-1.66753	0.947513	0.518526
Q8GSL4	10.4931	7.48832	8.47306	7.16742	8.33324	10.5531	3	3	6			1.80893	-1.57656	-0.439867	-2.17402	-1.56702	1.86596		-0.347097						3.7806	-3.29059	-0.915593	-4.56179	-3.1622	3.76506			3.7806	-3.29059	-0.915593	-4.56179	-3.1622	3.76506		0.788882		-1.17778	0.434793	0.7398
Q94DH3	8.75832	7.36194	7.37051	3.63006	10.1094	10.5523	3	3	6			0.0741999	-1.70294	-1.54241	-5.71138	0.209174	1.86519		-1.1347						0.155075	-3.55436	-3.21056	-11.9843	0.422106	3.76351			0.155075	-3.55436	-3.21056	-11.9843	0.422106	3.76351		0.11502		-0.396279	0.0894981	0.93985
Q0E2Y1	9.1243	10.9774	9.54792	11.5892	11.7246	10.5508	3	3	6			0.440179	1.91254	0.634993	2.24779	1.82433	1.86375		1.48726						0.919957	3.99182	1.32175	4.71659	3.68145	3.7606			0.919957	3.99182	1.32175	4.71659	3.68145	3.7606		0.212801		1.97504	3.00181	0.124843
Q7G4G7	9.69509	9.56144	11.3429	9.30266	8.94152	10.5472	3	3	6			1.01097	0.496554	2.42993	-0.0387754	-0.958748	1.86009		0.800002						2.11288	1.0364	5.05795	-0.0813632	-1.93472	3.75322			2.11288	1.0364	5.05795	-0.0813632	-1.93472	3.75322		0.679901		-2.1567	1.49601	0.354532
Q5KS50	11.2848	10.0817	10.5375	7.94404	12.4089	10.545	3	3	6			2.6007	1.01686	1.62459	-1.3974	2.50868	1.85787		1.36855						5.43537	2.12238	3.38161	-2.93219	5.06242	3.74874			5.43537	2.12238	3.38161	-2.93219	5.06242	3.74874		0.264131		-1.68679	0.836513	0.559995
Q6ZJJ1	7.58241	8.86536	10.8672	11.6611	11.3996	10.5433	3	3	6			-1.10172	-0.199525	1.95428	2.31967	1.49933	1.85623		1.05471						-2.30255	-0.416446	4.06787	4.86741	3.02561	3.74543			-2.30255	-0.416446	4.06787	4.86741	3.02561	3.74543		0.148931		3.42986	2.68366	0.155646
Q0E3F8	6.32508	10.9639	9.45925	9.64254	11.4274	10.5389	3	3	6			-2.35904	1.89902	0.546324	0.301102	1.52715	1.85177		0.627722						-4.93031	3.96361	1.13718	0.631808	3.08174	3.73644			-4.93031	3.96361	1.13718	0.631808	3.08174	3.73644		0.229607		2.4265	1.20648	0.433323
Q10LF7	8.57516	7.27594	10.475	11.4621	10.1079	10.5326	3	3	6			-0.108962	-1.78895	1.5621	2.12066	0.207606	1.84546		0.639651						-0.227727	-3.73387	3.25155	4.44981	0.418942	3.72369			-0.227727	-3.73387	3.25155	4.44981	0.418942	3.72369		0.549039		3.10083	1.94099	0.260438
A2YH64	9.42823	9.26104	9.95938	9.47756	10.2437	10.5305	3	3	6			0.744111	0.19615	1.04646	0.136119	0.343385	1.84341		0.718272						1.55516	0.409402	2.17822	0.285621	0.69294	3.71956			1.55516	0.409402	2.17822	0.285621	0.69294	3.71956		0.372259		0.185113	0.176355	0.884936
Q0JF48	11.4717	11.1123	11.3018	10.2739	11.1235	10.5242	3	3	6			2.7876	2.04742	2.38892	0.932475	1.22327	1.83715		1.86947						5.82598	4.27335	4.97258	1.95663	2.46853	3.70694			5.82598	4.27335	4.97258	1.95663	2.46853	3.70694		0.854908		-2.31327	5.15464	0.0280735
B9FS33	11.0505	10.1567	11.3779	10.399	10.2542	10.5211	3	3	6			2.36641	1.09183	2.46499	1.05752	0.353937	1.83402		1.52812						4.9457	2.27885	5.13093	2.21902	0.714233	3.70061			4.9457	2.27885	5.13093	2.21902	0.714233	3.70061		0.933603		-1.90721	2.28493	0.205195
Q10DV5	7.78195	9.09046	9.32096	10.3422	10.5366	10.5198	3	3	6			-0.902173	0.0255694	0.408035	1.00075	0.636371	1.83274		0.500215						-1.88551	0.0533681	0.849333	2.09989	1.28418	3.69803			-1.88551	0.0533681	0.849333	2.09989	1.28418	3.69803		0.864902		2.6883	3.89507	0.067215
Q5QMN4	10.3874	9.42004	10.632	10.2361	11.654	10.5166	3	3	6			1.70325	0.355157	1.71907	0.894697	1.75374	1.82949		1.3759						3.55972	0.74128	3.57828	1.87736	3.539	3.69148			3.55972	0.74128	3.57828	1.87736	3.539	3.69148		0.550604		0.409517	0.453553	0.730242
Q67X83	4.64201	9.11663	7.18497	7.94585	5.82896	10.5016	3	3	6			-4.04211	0.0517428	-1.72795	-1.39558	-4.0713	1.81454		-1.56178						-8.44787	0.107997	-3.59676	-2.92838	-8.21576	3.66132			-8.44787	0.107997	-3.59676	-2.92838	-8.21576	3.66132		0.684168		1.4846	0.42734	0.743632
A2YUL5	8.69045	8.30319	8.32211	8.70525	10.4139	10.5015	3	3	6			0.00632876	-0.7617	-0.590815	-0.636185	0.51368	1.81444		0.0576256						0.0132269	-1.58981	-1.22979	-1.33492	1.03659	3.66112			0.0132269	-1.58981	-1.22979	-1.33492	1.03659	3.66112		0.203487		2.05639	2.01088	0.248122
Q7XM31	11.0109	11.7686	11.6455	11.5816	10.61	10.5012	3	3	6			2.32682	2.70371	2.73255	2.24019	0.709745	1.81415		2.08786						4.86297	5.64315	5.68787	4.70063	1.43224	3.66052			4.86297	5.64315	5.68787	4.70063	1.43224	3.66052		0.143296		-2.13354	3.3227	0.0999466
Q2R0Q1	9.11338	6.4885	10.9476	11.5301	11.6142	10.4985	3	3	6			0.429254	-2.57639	2.03464	2.18868	1.71389	1.81136		0.933572						0.897125	-5.37741	4.23515	4.59254	3.45858	3.65489			0.897125	-5.37741	4.23515	4.59254	3.45858	3.65489		0.0303701		3.98371	1.77474	0.292248
Q5Z9P8	13.8351	10.7051	9.76858	9.11372	9.60859	10.4983	3	3	6			5.15094	1.64023	0.855658	-0.227721	-0.291678	1.81116		1.48976						10.7653	3.42346	1.78107	-0.477832	-0.588596	3.65448			10.7653	3.42346	1.78107	-0.477832	-0.588596	3.65448		0.407083		-4.46058	2.16522	0.222948
Q6H4G3	11.0369	10.9816	11.2134	11.7608	11.5991	10.4971	3	3	6			2.35281	1.91668	2.30048	2.41941	1.69886	1.80996		2.08303						4.91727	4.00047	4.78851	5.07669	3.42824	3.65207			4.91727	4.00047	4.78851	5.07669	3.42824	3.65207		0.471099		-0.516419	1.21375	0.431146
Q7FAY6	5.77592	7.41193	9.06768	5.16571	9.6703	10.4971	3	3	6			-2.9082	-1.65295	0.154753	-4.17573	-0.229963	1.80996		-1.16702						-6.07803	-3.45002	0.322121	-8.76201	-0.464058	3.65207			-6.07803	-3.45002	0.322121	-8.76201	-0.464058	3.65207		0.411235		1.21065	0.354255	0.782274
Q8RZA1	10.2471	10.2102	10.6615	10.1897	11.4446	10.4968	3	3	6			1.56297	1.1453	1.74859	0.848264	1.54434	1.80966		1.44319						3.26655	2.39045	3.63972	1.77993	3.11642	3.65146			3.26655	2.39045	3.63972	1.77993	3.11642	3.65146		0.613604		-0.249638	0.458478	0.727753
Q9SMX1	10.6593	6.96867	9.18306	10.4303	10.273	10.4967	3	3	6			1.97516	-2.09622	0.270141	1.08891	0.372715	1.80956		0.570044						4.12801	-4.37521	0.562305	2.28488	0.752126	3.65126			4.12801	-4.37521	0.562305	2.28488	0.752126	3.65126		0.206874		2.12439	1.11924	0.460337
A2WXU2	11.1368	11.3447	8.26458	10.6231	10.2189	10.4955	3	3	6			2.45268	2.27985	-0.64834	1.28162	0.318661	1.80836		1.24881						5.126	4.75848	-1.34953	2.68925	0.643048	3.64884			5.126	4.75848	-1.34953	2.68925	0.643048	3.64884		0.302457		-0.517934	0.266408	0.831387
Q7XUT9	9.33186	10.4242	9.95277	10.9389	9.66688	10.4948	3	3	6			0.647734	1.35928	1.03985	1.59748	-0.233384	1.80766		1.03644						1.35374	2.83707	2.16446	3.35202	-0.470962	3.64743			1.35374	2.83707	2.16446	3.35202	-0.470962	3.64743		0.189283		0.0577402	0.0455153	0.968944
Q8RYJ9	12.0725	6.01431	8.27081	9.82295	11.2117	10.4939	3	3	6			3.38838	-3.05058	-0.642114	0.481516	1.31144	1.80676		0.549234						7.08158	-6.36713	-1.33657	1.01037	2.64644	3.64562			7.08158	-6.36713	-1.33657	1.01037	2.64644	3.64562		0.0738344		2.64152	0.876002	0.544875
B9FXV5	10.499	12.612	10.9925	10.2419	13.3614	10.4867	3	3	6			1.81493	3.54711	2.07959	0.900427	3.46113	1.79964		2.26714						3.79312	7.40348	4.32871	1.88938	6.98445	3.63125			3.79312	7.40348	4.32871	1.88938	6.98445	3.63125		0.722883		-1.00674	0.691822	0.619072
Q67WM9	7.17253	3.44268	5.99607	11.0466	11.3295	10.4822	3	3	6			-1.5116	-5.62221	-2.91685	1.70514	1.4292	1.79511		-0.853535						-3.15918	-11.7346	-6.07149	3.57793	2.88407	3.6221			-3.15918	-11.7346	-6.07149	3.57793	2.88407	3.6221		0.0178614		10.3498	4.23235	0.0532031
Q0IP69	10.7698	10.3753	9.38102	11.7269	11.0511	10.4814	3	3	6			2.08571	1.31037	0.4681	2.38542	1.15088	1.7943		1.53246						4.35906	2.73499	0.974361	5.00537	2.32243	3.62047			4.35906	2.73499	0.974361	5.00537	2.32243	3.62047		0.771649		0.959955	1.04577	0.484386
Q69KP0	9.63303	9.11601	9.56655	9.00282	9.16817	10.4801	3	3	6			0.948908	0.0511189	0.653625	-0.338622	-0.732094	1.79299		0.395988						1.98318	0.106695	1.36053	-0.710538	-1.47734	3.61783			1.98318	0.106695	1.36053	-0.710538	-1.47734	3.61783		0.215939		-0.673489	0.496364	0.708891
Q9FT69	10.8859	10.6227	9.05496	10.9332	12.3144	10.4788	3	3	6			2.2018	1.55781	0.142034	1.59181	2.41418	1.79168		1.61655						4.60168	3.25143	0.295646	3.34013	4.87173	3.61518			4.60168	3.25143	0.295646	3.34013	4.87173	3.61518		0.241699		1.22609	1.26169	0.417056
Q5NAT8	7.30195	8.34323	11.5606	10.4049	12.5583	10.4769	3	3	6			-1.38217	-0.721657	2.6477	1.06349	2.65806	1.78985		1.00921						-2.88868	-1.50623	5.51124	2.23154	5.36388	3.6115			-2.88868	-1.50623	5.51124	2.23154	5.36388	3.6115		0.216652		3.36354	1.7909	0.288992
A2X0Q3	8.04357	10.1334	10.7118	10.4359	10.2376	10.4766	3	3	6			-0.640549	1.06851	1.79883	1.09444	0.337303	1.78955		0.908015						-1.33872	2.23019	3.7443	2.29649	0.680667	3.61089			-1.33872	2.23019	3.7443	2.29649	0.680667	3.61089		0.480549		0.65076	0.462547	0.725704
Q10B98	8.87249	9.16616	10.251	9.97456	11.8667	10.4755	3	3	6			0.188367	0.101276	1.33809	0.633121	1.96643	1.78844		1.00262						0.39368	0.211382	2.78525	1.32849	3.9682	3.60864			0.39368	0.211382	2.78525	1.32849	3.9682	3.60864		0.996708		1.83834	2.38482	0.191469
Q6K762	6.32857	5.92488	8.79396	10.6572	9.43202	10.4745	3	3	6			-2.35556	-3.14	-0.118963	1.31579	-0.468245	1.78742		-0.496592						-4.92302	-6.55378	-0.247623	2.76095	-0.944904	3.6066			-4.92302	-6.55378	-0.247623	2.76095	-0.944904	3.6066		0.707175		5.71569	3.79881	0.0718531
Q9FT73	9.29676	10.0995	11.5484	12.6142	9.34702	10.4717	3	3	6			0.612632	1.03459	2.63546	3.27281	-0.553242	1.78458		1.46447						1.28038	2.15939	5.48578	6.86741	-1.11642	3.60086			1.28038	2.15939	5.48578	6.86741	-1.11642	3.60086		0.467921		0.1421	0.0592357	0.959772
Q9ZRZ8	8.5404	9.39943	9.842	9.77954	10.9304	10.4676	3	3	6			-0.143724	0.33454	0.929081	0.438102	1.03018	1.78051		0.728115						-0.300378	0.698249	1.9339	0.919277	2.07886	3.59265			-0.300378	0.698249	1.9339	0.919277	2.07886	3.59265		0.821467		1.41967	2.10847	0.231892
Q8H0B2	7.59485	10.2814	10.2115	10.0528	8.92538	10.4615	3	3	6			-1.08928	1.21646	1.2986	0.711403	-0.974889	1.77439		0.489448						-2.27655	2.53899	2.70306	1.49275	-1.96729	3.58029			-2.27655	2.53899	2.70306	1.49275	-1.96729	3.58029		0.99046		0.0467464	0.0221709	0.98475
I1Z695	8.47306	9.16694	7.44145	10.1611	9.45835	10.4592	3	3	6			-0.211067	0.102054	-1.47147	0.819695	-0.44192	1.77213		0.0949036						-0.441122	0.213006	-3.0629	1.71998	-0.89178	3.57574			-0.441122	0.213006	-3.0629	1.71998	-0.89178	3.57574		0.74738		2.56499	2.37867	0.192286
Q6ZFR0	11.4	10.397	10.637	12.0423	10.7577	10.4513	3	3	6			2.7159	1.33215	1.72406	2.70087	0.857458	1.76422		1.84911						5.67613	2.78044	3.58867	5.66729	1.73032	3.55978			5.67613	2.78044	3.58867	5.66729	1.73032	3.55978		0.730333		-0.362618	0.300426	0.812012
Q2QNM1	9.7385	9.60023	10.3181	16.2959	11.7046	10.451	3	3	6			1.05437	0.535342	1.40517	6.95448	1.80433	1.76391		2.25293						2.2036	1.11736	2.92489	14.5927	3.64108	3.55915			2.2036	1.11736	2.92489	14.5927	3.64108	3.55915		0.0402781		5.18237	1.7764	0.291912
A3AF13	11.4163	9.16	10.6136	10.0591	11.5286	10.45	3	3	6			2.73215	0.0951103	1.70068	0.717637	1.62829	1.76288		1.43946						5.71008	0.198513	3.54001	1.50583	3.28583	3.55707			5.71008	0.198513	3.54001	1.50583	3.28583	3.55707		0.277442		-0.366622	0.247621	0.842284
F4K2E9	9.61062	11.6607	9.52438	10.536	12.4774	10.4488	3	3	6			0.926496	2.59582	0.611462	1.19452	2.57714	1.76175		1.6112						1.93634	5.41797	1.27277	2.50648	5.20058	3.55478			1.93634	5.41797	1.27277	2.50648	5.20058	3.55478		0.542301		0.878256	0.758738	0.591013
Q0D9R7	9.46659	7.95629	10.4385	10.7069	12.0731	10.441	3	3	6			0.782463	-1.1086	1.52556	1.36549	2.17281	1.75388		1.08193						1.63532	-2.31385	3.17548	2.86524	4.38465	3.53891			1.63532	-2.31385	3.17548	2.86524	4.38465	3.53891		0.134852		2.76395	2.49128	0.177849
Q8L8M9	14.3478	15.3746	14.9737	14.1833	14.3899	10.4365	3	3	6			5.66364	6.30974	6.06077	4.84189	4.48964	1.74941		4.85251						11.8368	13.1696	12.6156	10.1598	9.05994	3.52989			11.8368	13.1696	12.6156	10.1598	9.05994	3.52989		0.0685892		-4.95746	3.70996	0.0764171
A3CCP9	12.2742	12.6499	12.7056	12.5185	12.0029	10.4351	3	3	6			3.59005	3.58504	3.79267	3.17702	2.10266	1.74806		2.99925						7.50307	7.48266	7.89451	6.6664	4.24309	3.52716			7.50307	7.48266	7.89451	6.6664	4.24309	3.52716		0.0390351		-2.81453	3.40009	0.0947266
O70790	9.40733	9.25699	6.54337	6.92172	7.62125	10.4252	3	3	6			0.723208	0.1921	-2.36955	-2.41972	-2.27902	1.73812		-0.735809						1.51148	0.400949	-4.93227	-5.07734	-4.59899	3.50712			1.51148	0.400949	-4.93227	-5.07734	-4.59899	3.50712		0.675414		-1.04979	0.368952	0.774345
Q5SMM8	11.8689	10.7564	3.54597	7.89239	9.85885	10.4236	3	3	6			3.18482	1.6915	-5.36696	-1.44905	-0.0414137	1.73655		-0.0407584						6.65614	3.53048	-11.1714	-3.04056	-0.0835715	3.50394			6.65614	3.53048	-11.1714	-3.04056	-0.0835715	3.50394		0.211925		0.454871	0.0871445	0.941384
B9F166	8.36357	10.2118	7.40922	8.70023	9.08364	10.4234	3	3	6			-0.320558	1.14688	-1.5037	-0.641206	-0.816626	1.73634		-0.0664792						-0.669954	2.39375	-3.12999	-1.34545	-1.64792	3.50352			-0.669954	2.39375	-3.12999	-1.34545	-1.64792	3.50352		0.956379		0.638775	0.329365	0.795887
Q6ZG85	7.46565	9.77106	7.21975	8.30159	6.12606	10.4229	3	3	6			-1.21848	0.706173	-1.69317	-1.03985	-3.7742	1.73581		-0.880619						-2.54657	1.47392	-3.52438	-2.18194	-7.61621	3.50246			-2.54657	1.47392	-3.52438	-2.18194	-7.61621	3.50246		0.370022		-0.566222	0.182469	0.881194
Q65X70	8.80806	7.98379	10.2427	10.5208	9.74061	10.4219	3	3	6			0.12394	-1.0811	1.32977	1.17938	-0.159658	1.73476		0.521183						0.25903	-2.25645	2.76795	2.47471	-0.322184	3.50033			0.25903	-2.25645	2.76795	2.47471	-0.322184	3.50033		0.765606		1.62744	1.22489	0.42783
Q2QM00	9.24726	10.6993	10.2599	10.8723	9.65558	10.4205	3	3	6			0.56314	1.63443	1.34694	1.53085	-0.244681	1.73339		1.09401						1.17694	3.41135	2.80368	3.21222	-0.493758	3.49757			1.17694	3.41135	2.80368	3.21222	-0.493758	3.49757		0.424221		-0.391979	0.32184	0.800049
Q6ZA74	7.1534	6.45409	6.51389	8.34136	9.57202	10.4203	3	3	6			-1.53072	-2.61079	-2.39904	-1.00007	-0.328247	1.73318		-1.02262						-3.19915	-5.44922	-4.99365	-2.09847	-0.662392	3.49715			-3.19915	-5.44922	-4.99365	-2.09847	-0.662392	3.49715		0.287009		4.79277	4.12364	0.057367
Q0JDC6	8.43062	7.70612	10.4381	12.1664	8.12877	10.4203	3	3	6			-0.253503	-1.35877	1.52514	2.82491	-1.7715	1.73318		0.449911						-0.529813	-2.83601	3.17461	5.92757	-3.57482	3.49715			-0.529813	-2.83601	3.17461	5.92757	-3.57482	3.49715		0.547897		2.0137	0.786836	0.579614
Q5JK68	7.30186	7.2267	8.10108	9.57522	8.14914	10.4129	3	3	6			-1.38226	-1.83819	-0.811841	0.233781	-1.75113	1.72579		-0.637307						-2.88887	-3.83664	-1.68986	0.490546	-3.53372	3.48224			-2.88887	-3.83664	-1.68986	0.490546	-3.53372	3.48224		0.17081		2.95148	2.07546	0.23726
Q9FU27	10.3226	7.00888	11.0097	9.78591	10.9264	10.4116	3	3	6			1.63848	-2.05601	2.09677	0.444473	1.02611	1.72452		0.812389						3.42436	-4.29128	4.36446	0.932646	2.07065	3.47968			3.42436	-4.29128	4.36446	0.932646	2.07065	3.47968		0.134631		0.995142	0.42731	0.743647
Q10Q99	8.87517	12.753	8.37434	10.8816	11.3802	10.4097	3	3	6			0.191042	3.68816	-0.538579	1.54021	1.47993	1.72262		1.34723						0.399271	7.69789	-1.12106	3.23186	2.98644	3.47583			0.399271	7.69789	-1.12106	3.23186	2.98644	3.47583		0.00537339		0.906011	0.375135	0.771033
Q6ENG0	10.3948	9.19412	11.8838	9.49615	11.9299	10.408	3	3	6			1.71066	0.12923	2.97083	0.154718	2.02966	1.72092		1.45267						3.57522	0.269726	6.18384	0.324647	4.09579	3.4724			3.57522	0.269726	6.18384	0.324647	4.09579	3.4724		0.634976		-0.711982	0.418206	0.748354
Q5VQ78	9.93399	9.49546	10.7819	8.9028	11.2334	10.4054	3	3	6			1.24986	0.430568	1.86893	-0.43864	1.33317	1.71826		1.02703						2.61216	0.898677	3.89021	-0.920407	2.6903	3.46704			2.61216	0.898677	3.89021	-0.920407	2.6903	3.46704		0.582591		-0.721372	0.56381	0.676513
Q5Z678	5.75841	9.83547	3.12063	9.89659	9.72785	10.4052	3	3	6			-2.92571	0.770579	-5.79229	0.555153	-0.172413	1.71815		-0.974422						-6.11463	1.60834	-12.0568	1.16489	-0.347923	3.46683			-6.11463	1.60834	-12.0568	1.16489	-0.347923	3.46683		0.145739		6.94895	2.59054	0.166024
Q91PP5	11.5052	13.2539	11.6384	12.4075	13.8407	10.4033	3	3	6			2.82109	4.18903	2.72547	3.06607	3.94041	1.71624		3.07639						5.89598	8.7433	5.67312	6.43359	7.95163	3.46296			5.89598	8.7433	5.67312	6.43359	7.95163	3.46296		0.719725		-0.821405	0.634286	0.64426
Q67J17	8.66067	10.3121	8.75722	4.38977	10.1107	10.3938	3	3	6			-0.0234499	1.2472	-0.1557	-4.95166	0.210479	1.70673		-0.327735						-0.0490093	2.60314	-0.324093	-10.3902	0.42474	3.44377			-0.0490093	2.60314	-0.324093	-10.3902	0.42474	3.44377		0.0941264		-2.91724	0.902648	0.534904
Q0DDF6	10.8238	8.40467	7.7496	10.6905	11.664	10.3934	3	3	6			2.13972	-0.660214	-1.16332	1.34908	1.76378	1.7063		0.855891						4.47194	-1.37799	-2.42148	2.83081	3.55926	3.4429			4.47194	-1.37799	-2.42148	2.83081	3.55926	3.4429		0.0219425		3.0535	1.78575	0.290024
Q0DA50	10.4185	8.46911	9.77987	9.0098	10.0939	10.3875	3	3	6			1.73436	-0.595774	0.866944	-0.331637	0.193681	1.70038		0.59466						3.62475	-1.24349	1.80456	-0.695879	0.390841	3.43097			3.62475	-1.24349	1.80456	-0.695879	0.390841	3.43097		0.861205		-0.353295	0.217197	0.860235
Q5JKF2	11.2931	11.386	11.6266	10.3572	11.6183	10.3848	3	3	6			2.609	2.32114	2.7137	1.01578	1.71803	1.69769		2.01256						5.45272	4.84465	5.64862	2.13144	3.46693	3.42553			5.45272	4.84465	5.64862	2.13144	3.46693	3.42553		0.467169		-2.30736	6.6474	0.00997549
Q651X7	8.72908	12.1987	7.04341	10.7398	11.6944	10.3841	3	3	6			0.0449536	3.13383	-1.86951	1.39834	1.79414	1.69704		1.03313						0.0939513	6.5409	-3.89143	2.93417	3.62051	3.42423			0.0939513	6.5409	-3.89143	2.93417	3.62051	3.42423		0.00897734		2.41183	0.969017	0.510854
Q942N7	6.71466	10.181	9.85275	7.37252	11.6365	10.3798	3	3	6			-1.96947	1.11614	0.939824	-1.96892	1.73627	1.69272		0.257761						-4.11611	2.3296	1.95626	-4.13142	3.50373	3.4155			-4.11611	2.3296	1.95626	-4.13142	3.50373	3.4155		0.810652		0.872687	0.315765	0.803425
Q8H038	10.1105	10.6079	10.1355	11.1718	9.1819	10.3758	3	3	6			1.42636	1.543	1.22253	1.83037	-0.718367	1.68871		1.16543						2.98104	3.22053	2.54472	3.84069	-1.44964	3.40741			2.98104	3.22053	2.54472	3.84069	-1.44964	3.40741		0.0268508		-0.98261	0.685688	0.621709
Q9LHZ7	9.21364	8.62264	11.4852	10.221	9.85776	10.3732	3	3	6			0.529516	-0.44225	2.57225	0.879546	-0.0425017	1.6861		0.863777						1.10667	-0.923058	5.3542	1.84557	-0.085767	3.40214			1.10667	-0.923058	5.3542	1.84557	-0.085767	3.40214		0.458629		-0.125287	0.0657798	0.955429
Q2QZ37	7.50819	7.41075	4.50481	11.6784	11.5387	10.3726	3	3	6			-1.17593	-1.65414	-4.40811	2.33694	1.63846	1.68555		-0.262872						-2.45765	-3.4525	-9.17558	4.90365	3.30635	3.40105			-2.45765	-3.4525	-9.17558	4.90365	3.30635	3.40105		0.11514		8.89893	6.10486	0.0145296
Q7XT99	11.186	10.9506	11.2675	11.8215	12.7611	10.3699	3	3	6			2.50187	1.88567	2.35457	2.48002	2.86081	1.68283		2.29429						5.22881	3.93575	4.90108	5.20387	5.77302	3.39555			5.22881	3.93575	4.90108	5.20387	5.77302	3.39555		0.453484		0.10227	0.142099	0.9062
Q0JFI2	9.20102	8.31143	10.2241	9.92563	12.5194	10.3642	3	3	6			0.516898	-0.753457	1.3112	0.584191	2.61913	1.67715		0.992518						1.0803	-1.57261	2.72929	1.22582	5.28531	3.38409			1.0803	-1.57261	2.72929	1.22582	5.28531	3.38409		0.933772		2.55275	2.24395	0.211108
B9G8P1	10.4916	11.6046	11.1722	8.29953	11.5476	10.3636	3	3	6			1.80743	2.53971	2.25925	-1.04191	1.6473	1.67649		1.48138						3.77746	5.30086	4.70268	-2.18626	3.32421	3.38276			3.77746	5.30086	4.70268	-2.18626	3.32421	3.38276		0.108896		-3.08676	2.47872	0.179404
Q2KNB4	9.02857	10.9682	9.63272	7.03496	10.0349	10.3636	3	3	6			0.344446	1.90335	0.719799	-2.30647	0.134671	1.67649		0.412047						0.719879	3.97264	1.49828	-4.83972	0.271763	3.38276			0.719879	3.97264	1.49828	-4.83972	0.271763	3.38276		0.286752		-2.45866	1.33574	0.396188
Q8H3A7	8.69999	9.31433	8.02768	11.1534	10.5943	10.3627	3	3	6			0.0158655	0.249447	-0.885239	1.81199	0.69406	1.67562		0.593623						0.0331584	0.520643	-1.84264	3.80213	1.40059	3.381			0.0331584	0.520643	-1.84264	3.80213	1.40059	3.381		0.972648		3.29085	4.90601	0.0333536
Q6Z3A3	7.68706	8.32513	10.0572	11.7331	13.648	10.3579	3	3	6			-0.997063	-0.739762	1.14426	2.39171	3.74776	1.67079		1.20295						-2.08382	-1.54402	2.38179	5.01856	7.56285	3.37125			-2.08382	-1.54402	2.38179	5.01856	7.56285	3.37125		0.857558		5.7329	4.75763	0.0369667
Q9LL45	8.27244	9.28086	8.60077	10.0247	10.3808	10.3561	3	3	6			-0.41168	0.215976	-0.312156	0.683287	0.480521	1.66903		0.387496						-0.860396	0.450783	-0.649759	1.43375	0.969675	3.3677			-0.860396	0.450783	-0.649759	1.43375	0.969675	3.3677		0.469174		2.27683	4.22727	0.0533906
P35681	11.1654	10.8944	10.7837	11.3006	11.658	10.3549	3	3	6			2.48129	1.82955	1.87073	1.95914	1.75772	1.66782		1.92771						5.18579	3.81862	3.89396	4.11091	3.54703	3.36526			5.18579	3.81862	3.89396	4.11091	3.54703	3.36526		0.40758		-0.62506	1.85133	0.277137
Q8GU83	10.337	9.80885	9.67143	12.7499	11.2486	10.3526	3	3	6			1.65283	0.743964	0.758511	3.40847	1.34837	1.6655		1.59628						3.45435	1.55279	1.57886	7.15207	2.72098	3.36059			3.45435	1.55279	1.57886	7.15207	2.72098	3.36059		0.343371		2.21588	2.19443	0.21848
Q6ET36	9.36501	13.1046	10.9091	10.4804	11.4147	10.3489	3	3	6			0.680887	4.03974	1.99622	1.13895	1.51442	1.66186		1.83868						1.42303	8.43171	4.15517	2.38988	3.05605	3.35323			1.42303	8.43171	4.15517	2.38988	3.05605	3.35323		0.0382562		-1.73692	1.04427	0.484889
Q0DG35	10.5522	12.2586	10.9781	12.2701	11.8155	10.3461	3	3	6			1.86807	3.19368	2.06514	2.92871	1.91528	1.65898		2.27164						3.90419	6.66581	4.29864	6.14537	3.86497	3.34742			3.90419	6.66581	4.29864	6.14537	3.86497	3.34742		0.996665		-0.503623	0.513856	0.700348
Q8L840	12.3141	10.3694	12.8488	9.62892	12.6656	10.3404	3	3	6			3.63001	1.30449	3.93586	0.287482	2.76534	1.65331		2.26275						7.58658	2.72272	8.19257	0.603229	5.58036	3.33599			7.58658	2.72272	8.19257	0.603229	5.58036	3.33599		0.817294		-2.99409	1.97549	0.254284
A1A699	10.785	11.1217	11.5003	12.8953	12.3135	10.3404	3	3	6			2.10084	2.05678	2.58742	3.55387	2.41321	1.65331		2.39424						4.39067	4.29288	5.38577	7.45716	4.86979	3.33599			4.39067	4.29288	5.38577	7.45716	4.86979	3.33599		0.155478		0.531206	0.528587	0.693233
Q0WNP8	8.92573	8.54342	10.5096	11.8392	10.8277	10.3384	3	3	6			0.241609	-0.521469	1.59665	2.49781	0.927395	1.65131		1.06555						0.504954	-1.0884	3.32347	5.24119	1.87145	3.33195			0.504954	-1.0884	3.32347	5.24119	1.87145	3.33195		0.72783		2.56819	2.41513	0.187488
Q9M2F9	9.87603	9.6283	8.98709	11.2431	9.45236	10.3353	3	3	6			1.1919	0.563413	0.07417	1.90162	-0.4479	1.64818		0.821898						2.49103	1.17595	0.154386	3.9902	-0.903848	3.32564			2.49103	1.17595	0.154386	3.9902	-0.903848	3.32564		0.325961		0.863544	0.658814	0.633399
Q10MW3	6.96104	9.46907	9.84662	11.7136	12.5911	10.3352	3	3	6			-1.72308	0.404185	0.933695	2.37212	2.69081	1.64807		1.0543						-3.60117	0.84361	1.94351	4.97747	5.42997	3.32542			-3.60117	0.84361	1.94351	4.97747	5.42997	3.32542		0.249293		4.84897	4.17343	0.0554206
O22386	10.4187	9.92215	10.7442	12.2065	12.9482	10.3349	3	3	6			1.73457	0.857266	1.83132	2.86509	3.04794	1.64785		1.99734						3.62519	1.78928	3.81193	6.01187	6.15064	3.32497			3.62519	1.78928	3.81193	6.01187	6.15064	3.32497		0.659921		2.08703	2.87015	0.136773
Q7X996	7.78215	8.21694	9.21233	10.5725	9.1186	10.3349	3	3	6			-0.901977	-0.847947	0.299403	1.23107	-0.781661	1.64785		0.10779						-1.8851	-1.76983	0.623213	2.58319	-1.57737	3.32497			-1.8851	-1.76983	0.623213	2.58319	-1.57737	3.32497		0.446233		2.45417	2.12533	0.229199
Q6YVY6	8.24873	8.24341	8.79344	11.62	11.058	10.3344	3	3	6			-0.435389	-0.821475	-0.119483	2.27855	1.15773	1.64729		0.617871						-0.909947	-1.71457	-0.248706	4.78113	2.33625	3.32384			-0.909947	-1.71457	-0.248706	4.78113	2.33625	3.32384		0.525339		4.43815	7.42478	0.00581996
Q5D892	11.5687	8.4025	9.59423	9.49418	11.303	10.3339	3	3	6			2.88459	-0.662387	0.681308	0.152738	1.40272	1.64684		1.01764						6.02869	-1.38253	1.41816	0.320494	2.83064	3.32294			6.02869	-1.38253	1.41816	0.320494	2.83064	3.32294		0.312455		0.136583	0.064194	0.95648
Q0DDE3	10.5359	9.19518	9.95839	10.7696	10.9577	10.3314	3	3	6			1.85174	0.130288	1.04547	1.42815	1.05742	1.64427		1.19289						3.87006	0.271936	2.17617	2.99672	2.13383	3.31775			3.87006	0.271936	2.17617	2.99672	2.13383	3.31775		0.207392		0.710048	0.854666	0.552993
Q0JJ01	5.28655	9.97039	9.54745	7.91091	8.74843	10.3301	3	3	6			-3.39757	0.905506	0.63453	-1.43052	-1.15184	1.64304		-0.466144						-7.1008	1.88996	1.32079	-3.0017	-2.32437	3.31526			-7.1008	1.88996	1.32079	-3.0017	-2.32437	3.31526		0.643643		0.626415	0.20463	0.867761
Q9FFT9	8.65091	10.6177	9.03069	11.3314	13.1763	10.3281	3	3	6			-0.0332151	1.55286	0.117771	1.98993	3.27599	1.64102		1.42406						-0.0694183	3.2411	0.245143	4.1755	6.61083	3.31119			-0.0694183	3.2411	0.245143	4.1755	6.61083	3.31119		0.934342		3.56023	3.84803	0.0694427
Q7G6K7	9.49548	10.7088	8.49534	10.2554	10.3184	10.3265	3	3	6			0.811352	1.64394	-0.417588	0.913946	0.418165	1.63945		0.834877						1.69569	3.43121	-0.869218	1.91775	0.843843	3.30802			1.69569	3.43121	-0.869218	1.91775	0.843843	3.30802		0.491815		0.603975	0.522552	0.696139
Q7XJN0	9.31872	10.9055	10.4691	8.73468	12.0732	10.3253	3	3	6			0.6346	1.84065	1.55621	-0.606761	2.17297	1.63821		1.20598						1.32629	3.84178	3.23928	-1.27318	4.38499	3.30552			1.32629	3.84178	3.23928	-1.27318	4.38499	3.30552		0.320964		-0.663342	0.427234	0.743686
B8BKI8	12.2194	11.5985	10.4478	11.3787	13.0276	10.3249	3	3	6			3.53529	2.53363	1.53488	2.03729	3.12733	1.63776		2.40103						7.38862	5.28816	3.19489	4.27489	6.31085	3.30461			7.38862	5.28816	3.19489	4.27489	6.31085	3.30461		0.697396		-0.660439	0.55112	0.68249
Q60DW3	10.9854	10.7829	8.34185	10.606	9.86864	10.3231	3	3	6			2.30129	1.71803	-0.571071	1.2646	-0.0316276	1.63596		1.05286						4.80961	3.58585	-1.1887	2.65353	-0.0638235	3.30098			4.80961	3.58585	-1.1887	2.65353	-0.0638235	3.30098		0.481749		-0.438693	0.243403	0.84475
Q0DVX2	9.54075	11.2868	9.52986	6.04967	9.23759	10.3223	3	3	6			0.856625	2.22196	0.616937	-3.29176	-0.662673	1.63517		0.229376						1.79031	4.63765	1.28417	-6.90717	-1.33725	3.29939			1.79031	4.63765	1.28417	-6.90717	-1.33725	3.29939		0.222447		-4.21905	2.00629	0.248913
F4J061	10.4975	9.78797	5.5861	9.81965	9.53718	10.3173	3	3	6			1.81333	0.723081	-3.32682	0.478215	-0.363085	1.63021		0.159154						3.78979	1.50921	-6.92484	1.00345	-0.732695	3.28937			3.78979	1.50921	-6.92484	1.00345	-0.732695	3.28937		0.226547		1.72866	0.635699	0.643629
Q35322	9.72455	10.5247	10.3088	9.52615	10.3213	10.3164	3	3	6			1.04042	1.45985	1.39587	0.18471	0.420987	1.6293		1.02186						2.17445	3.04698	2.90553	0.38758	0.849537	3.28754			2.17445	3.04698	2.90553	0.38758	0.849537	3.28754		0.165689		-1.20077	1.88747	0.270281
Q0JKT4	8.48055	9.11647	10.4201	9.03483	8.47602	10.315	3	3	6			-0.203575	0.0515868	1.50714	-0.306611	-1.42425	1.62794		0.208706						-0.425465	0.107671	3.13715	-0.643367	-2.87409	3.2848			-0.425465	0.107671	3.13715	-0.643367	-2.87409	3.2848		0.550464		-1.01734	0.609139	0.655588
Q8RXS6	10.9671	9.86793	12.0004	10.4788	11.7737	10.3149	3	3	6			2.28296	0.80304	3.0875	1.13733	1.87345	1.62783		1.80202						4.7713	1.6761	6.42669	2.38649	3.78056	3.28457			4.7713	1.6761	6.42669	2.38649	3.78056	3.28457		0.158164		-1.14082	1.0721	0.475627
A3BMZ5	10.6873	11.3316	10.5339	10.5123	10.0815	10.3136	3	3	6			2.00316	2.2667	1.62099	1.17091	0.181218	1.62647		1.47824						4.18654	4.73103	3.37413	2.45694	0.365693	3.28183			4.18654	4.73103	3.37413	2.45694	0.365693	3.28183		0.342114		-2.06241	3.37339	0.0964961
Q9LGU7	9.55802	10.2824	10.5435	11.1683	10.0727	10.3127	3	3	6			0.873896	1.21751	1.63059	1.82686	0.172404	1.62556		1.22447						1.82641	2.54116	3.39411	3.83333	0.347905	3.28			1.82641	2.54116	3.39411	3.83333	0.347905	3.28		0.298702		-0.100149	0.0953604	0.936038
Q7XU38	8.02298	9.76974	11.6407	7.00304	6.84172	10.3122	3	3	6			-0.661145	0.704852	2.72777	-2.3384	-3.05854	1.62511		-0.166725						-1.38177	1.47116	5.67792	-4.9067	-6.17204	3.27908			-1.38177	1.47116	5.67792	-4.9067	-6.17204	3.27908		0.647884		-4.52232	1.84843	0.277695
Q2QMG2	10.6284	9.22323	12.962	11.3952	12.4783	10.312	3	3	6			1.94432	0.158342	4.04912	2.05372	2.57802	1.62488		2.06807						4.06356	0.33049	8.42833	4.30936	5.20237	3.27862			4.06356	0.33049	8.42833	4.30936	5.20237	3.27862		0.10681		-0.0106754	0.00481065	0.996671
Q60DX8	7.24907	9.85023	8.61883	7.07767	6.11258	10.3082	3	3	6			-1.43506	0.785347	-0.294098	-2.26377	-3.78769	1.62113		-0.895689						-2.99921	1.63917	-0.61217	-4.75011	-7.64344	3.27106			-2.99921	1.63917	-0.61217	-4.75011	-7.64344	3.27106		0.288073		-2.38342	0.898567	0.536419
P0C522	11.9751	13.0917	9.57092	12.6483	11.7152	10.3069	3	3	6			3.29097	4.02683	0.657995	3.3069	1.81492	1.61977		2.4529						6.87801	8.40475	1.36963	6.93893	3.66246	3.2683			6.87801	8.40475	1.36963	6.93893	3.66246	3.2683		0.457412		-0.927566	0.469166	0.722382
B9F676	9.76243	10.8259	10.8441	8.90271	12.9861	10.2966	3	3	6			1.07831	1.76103	1.93115	-0.43873	3.08581	1.60948		1.50451						2.25362	3.67559	4.01974	-0.920597	6.22706	3.24754			2.25362	3.67559	4.01974	-0.920597	6.22706	3.24754		0.127352		-0.464982	0.253632	0.838782
P27500	11.5276	11.1097	8.49649	8.70584	8.33499	10.2937	3	3	6			2.84345	2.04481	-0.416429	-0.635597	-1.56528	1.60661		0.646261						5.9427	4.26791	-0.866806	-1.33369	-3.15868	3.24175			5.9427	4.26791	-0.866806	-1.33369	-3.15868	3.24175		0.926768		-3.53147	1.86114	0.275258
A2Z9A6	8.21747	10.7957	9.82582	8.57365	13.0401	10.292	3	3	6			-0.46665	1.73083	0.912894	-0.76779	3.13987	1.60488		1.02567						-0.975281	3.61256	1.90021	-1.61107	6.33616	3.23827			-0.975281	3.61256	1.90021	-1.61107	6.33616	3.23827		0.501849		1.14196	0.533004	0.691114
Q6Z0E2	9.3187	9.70707	8.47743	8.37955	10.398	10.2876	3	3	6			0.634578	0.642179	-0.435489	-0.961886	0.49773	1.6005		0.329603						1.32624	1.34035	-0.90648	-2.01834	1.0044	3.22943			1.32624	1.34035	-0.90648	-2.01834	1.0044	3.22943		0.38844		0.151795	0.100188	0.932911
Q6K537	10.4584	11.0778	10.5706	10.6993	11.4779	10.2771	3	3	6			1.77428	2.01293	1.65769	1.35787	1.57765	1.58996		1.66173						3.70818	4.20136	3.45052	2.84926	3.18364	3.20816			3.70818	4.20136	3.45052	2.84926	3.18364	3.20816		0.432845		-0.706337	4.41305	0.0469395
Q7G3T8	9.39438	10.0296	10.8066	9.80142	9.89438	10.2755	3	3	6			0.710254	0.964676	1.89371	0.45998	-0.00588679	1.58845		0.935196						1.4844	2.01346	3.94179	0.965185	-0.0118793	3.20511			1.4844	2.01346	3.94179	0.965185	-0.0118793	3.20511		0.761597		-1.09375	1.26123	0.417188
Q7XDC8	10.3477	11.2102	10.7158	11.5969	12.5307	10.2752	3	3	6			1.66361	2.1453	1.80287	2.2555	2.63043	1.5881		2.0143						3.47688	4.47764	3.75271	4.73276	5.30813	3.20441			3.47688	4.47764	3.75271	4.73276	5.30813	3.20441		0.368718		0.51269	0.99519	0.50167
Q9LHY9	9.93269	8.62892	8.68755	9.39032	9.45251	10.2752	3	3	6			1.24856	-0.435968	-0.225373	0.0488822	-0.447756	1.5881		0.296075						2.60945	-0.909947	-0.469118	0.102571	-0.903557	3.20441			2.60945	-0.909947	-0.469118	0.102571	-0.903557	3.20441		0.890028		0.391011	0.277022	0.825293
P93411	9.91256	7.58301	9.28877	8.20418	11.3672	10.2734	3	3	6			1.22844	-1.48188	0.37585	-1.13726	1.46693	1.58635		0.339739						2.56739	-3.09296	0.78234	-2.38633	2.96022	3.20088			2.56739	-3.09296	0.78234	-2.38633	2.96022	3.20088		0.91266		1.17267	0.599198	0.660121
Q6I628	6.8732	8.72206	6.24831	7.21062	8.47302	10.273	3	3	6			-1.81093	-0.342831	-2.66462	-2.13081	-1.42725	1.58589		-1.13176						-3.78476	-0.715553	-5.54646	-4.47113	-2.88014	3.19994			-3.78476	-0.715553	-5.54646	-4.47113	-2.88014	3.19994		0.534424		1.96515	0.967132	0.511522
Q6K5F8	10.139	11.5012	10.0195	8.98755	7.76487	10.2726	3	3	6			1.45492	2.4363	1.10653	-0.353889	-2.13539	1.58554		0.682334						3.04072	5.08502	2.30326	-0.742572	-4.30915	3.19923			3.04072	5.08502	2.30326	-0.742572	-4.30915	3.19923		0.25668		-4.09383	2.71082	0.152743
Q7XUV2	6.99605	8.8864	11.1492	7.09835	9.43041	10.2717	3	3	6			-1.68807	-0.178489	2.23632	-2.24309	-0.469854	1.5846		-0.126431						-3.52801	-0.372541	4.65494	-4.70672	-0.948151	3.19735			-3.52801	-0.372541	4.65494	-4.70672	-0.948151	3.19735		0.957103		-1.07064	0.392435	0.761843
Q7XDQ7	7.20408	9.29347	10.5929	9.34403	10.1733	10.2702	3	3	6			-1.48004	0.228585	1.68	0.00259234	0.273037	1.58308		0.38121						-3.09323	0.477099	3.49696	0.00543955	0.550981	3.19429			-3.09323	0.477099	3.49696	0.00543955	0.550981	3.19429		0.421832		0.956627	0.559437	0.678567
Q6ENA6	11.1712	11.544	11.9663	11.4883	12.6648	10.2662	3	3	6			2.48705	2.47911	3.05333	2.14685	2.76449	1.57911		2.41832						5.19785	5.17437	6.35557	4.50479	5.57866	3.18626			5.19785	5.17437	6.35557	4.50479	5.57866	3.18626		0.482075		-1.15269	2.18269	0.220264
P16081	8.05577	9.60313	11.3851	8.48361	10.628	10.2617	3	3	6			-0.628353	0.538238	2.47213	-0.857823	0.727725	1.57465		0.637761						-1.31323	1.1234	5.14579	-1.79999	1.46852	3.17727			-1.31323	1.1234	5.14579	-1.79999	1.46852	3.17727		0.750912		-0.703386	0.35375	0.782547
Q7EYV7	10.6515	11.8904	11.4185	12.0249	13.2216	10.2607	3	3	6			1.96738	2.82553	2.50556	2.68343	3.32131	1.57359		2.47947						4.11174	5.89741	5.21538	5.63068	6.70229	3.17513			4.11174	5.89741	5.21538	5.63068	6.70229	3.17513		0.397848		0.0945241	0.0903329	0.939306
Q6H7E4	6.95292	7.20887	6.55534	9.58432	11.1699	10.2607	3	3	6			-1.73121	-1.85602	-2.35758	0.242886	1.2696	1.57359		-0.476456						-3.61816	-3.87386	-4.90736	0.509653	2.56201	3.17513			-3.61816	-3.87386	-4.90736	0.509653	2.56201	3.17513		0.385901		6.21539	8.77742	0.00227894
Q67UC7	9.26341	10.2969	10.2382	9.94508	10.0542	10.2596	3	3	6			0.579287	1.23203	1.32524	0.603641	0.153932	1.57253		0.91111						1.21069	2.57148	2.75852	1.26663	0.31063	3.17299			1.21069	2.57148	2.75852	1.26663	0.31063	3.17299		0.503121		-0.596809	0.804381	0.572608
B6RGY0	8.5841	7.65542	7.33539	7.25993	8.15906	10.2589	3	3	6			-0.100025	-1.40946	-1.57753	-2.08151	-1.7412	1.57183		-0.889651						-0.209049	-2.94182	-3.28367	-4.36766	-3.51369	3.17157			-0.209049	-2.94182	-3.28367	-4.36766	-3.51369	3.17157		0.285635		0.574917	0.261483	0.83423
Q0DY81	11.6797	12.2944	9.00307	11.3724	12.7642	10.2575	3	3	6			2.99562	3.22948	0.0901446	2.03099	2.86392	1.57041		2.13009						6.26073	6.74052	0.187638	4.26167	5.7793	3.16872			6.26073	6.74052	0.187638	4.26167	5.7793	3.16872		0.228248		0.00693299	0.00335192	0.997679
Q6ATS0	8.1153	6.98254	8.29218	5.67237	10.1056	10.2568	3	3	6			-0.568819	-2.08235	-0.62074	-3.66907	0.205382	1.5697		-0.860982						-1.18881	-4.34626	-1.29208	-7.69888	0.414453	3.16729			-1.18881	-4.34626	-1.29208	-7.69888	0.414453	3.16729		0.183201		0.903339	0.313226	0.80484
Q6EPG8	4.04544	5.15797	10.6342	9.54925	6.28372	10.2557	3	3	6			-4.63868	-3.90691	1.72125	0.207808	-3.61655	1.56864		-1.44407						-9.69466	-8.15446	3.58282	0.436048	-7.29807	3.16515			-9.69466	-8.15446	3.58282	0.436048	-7.29807	3.16515		0.716764		3.52314	0.894907	0.537782
P46773	9.35171	11.928	10.8751	10.2428	12.4442	10.2518	3	3	6			0.667589	2.86311	1.96221	0.90138	2.54392	1.56474		1.75049						1.39524	5.97585	4.08438	1.89138	5.13355	3.15728			1.39524	5.97585	4.08438	1.89138	5.13355	3.15728		0.67013		-0.42442	0.308646	0.807399
Q60EW9	10.3782	9.86785	9.49705	10.9756	9.10347	10.249	3	3	6			1.69406	0.802963	0.58413	1.6342	-0.796794	1.5619		0.91341						3.54053	1.67593	1.21588	3.42906	-1.6079	3.15154			3.54053	1.67593	1.21588	3.42906	-1.6079	3.15154		0.317954		-0.486545	0.324814	0.798401
Q6EU10	7.40267	8.09445	11.0291	12.6538	10.5419	10.2472	3	3	6			-1.28145	-0.97044	2.11616	3.31237	0.641606	1.56012		0.896394						-2.67819	-2.02549	4.40482	6.95041	1.29474	3.14795			-2.67819	-2.02549	4.40482	6.95041	1.29474	3.14795		0.703404		3.89732	2.07509	0.237321
Q84TV3	10.6038	11.2351	8.01207	9.52087	9.77947	10.2423	3	3	6			1.91969	2.17023	-0.900858	0.179437	-0.120792	1.55525		0.800492						4.01208	4.52968	-1.87515	0.376516	-0.243754	3.13812			4.01208	4.52968	-1.87515	0.376516	-0.243754	3.13812		0.407731		-1.13191	0.624357	0.648709
Q6Z6M4	7.52168	8.46544	8.45611	8.59738	11.0916	10.2422	3	3	6			-1.16244	-0.599443	-0.456816	-0.744055	1.19137	1.55513		-0.0360436						-2.42946	-1.25115	-0.950871	-1.56127	2.40414	3.13788			-2.42946	-1.25115	-0.950871	-1.56127	2.40414	3.13788		0.174476		2.87075	2.906	0.133415
Q6L4S0	7.17622	8.86944	11.3301	9.99661	6.24696	10.2409	3	3	6			-1.5079	-0.195447	2.41721	0.655178	-3.65331	1.55382		-0.121742						-3.15145	-0.407936	5.03147	1.37477	-7.37225	3.13523			-3.15145	-0.407936	5.03147	1.37477	-7.37225	3.13523		0.707769		-1.44478	0.436689	0.738828
Q6I621	10.1434	9.74631	9.90147	11.0314	11.9231	10.2331	3	3	6			1.45926	0.681426	0.988547	1.68992	2.02284	1.54605		1.39801						3.0498	1.42226	2.05768	3.54599	4.08202	3.11955			3.0498	1.42226	2.05768	3.54599	4.08202	3.11955		0.513776		1.40594	3.99561	0.0626905
A3C4S4	7.48599	8.65557	8.66917	7.96867	7.81192	10.2315	3	3	6			-1.19813	-0.409321	-0.243755	-1.37277	-2.08834	1.54437		-0.627993						-2.50405	-0.854329	-0.507381	-2.88051	-4.21421	3.11617			-2.50405	-0.854329	-0.507381	-2.88051	-4.21421	3.11617		0.138932		-0.037598	0.0175132	0.987934
Q0INW1	9.38414	7.16712	9.98228	10.3088	10.1402	10.2307	3	3	6			0.700013	-1.89777	1.06936	0.967357	0.239926	1.54365		0.437088						1.463	-3.961	2.22589	2.02982	0.484162	3.11471			1.463	-3.961	2.22589	2.02982	0.484162	3.11471		0.266256		1.96694	1.32081	0.400309
Q2QNU0	9.32495	9.6462	10.2059	10.4063	12.6999	10.2299	3	3	6			0.640822	0.581312	1.29299	1.06487	2.79963	1.54281		1.32041						1.33929	1.21331	2.69139	2.23445	5.64957	3.11302			1.33929	1.21331	2.69139	2.23445	5.64957	3.11302		0.351891		1.91768	2.60555	0.164305
Q2QN30	9.83452	4.71061	8.54148	9.54973	8.54689	10.2286	3	3	6			1.1504	-4.35427	-0.37144	0.20829	-1.35337	1.54148		-0.529819						2.40428	-9.08819	-0.773159	0.437058	-2.73106	3.11035			2.40428	-9.08819	-0.773159	0.437058	-2.73106	3.11035		0.390723		2.7578	0.970734	0.510246
Q69T22	8.80229	11.2805	9.45341	10.7653	10.5629	10.228	3	3	6			0.118167	2.21559	0.540491	1.42385	0.662645	1.54088		1.0836						0.246964	4.62436	1.12504	2.98769	1.3372	3.10914			0.246964	4.62436	1.12504	2.98769	1.3372	3.10914		0.308943		0.479218	0.399241	0.758257
Q6ENI4	7.85829	10.3749	8.81336	10.7083	12.2847	10.227	3	3	6			-0.825831	1.31004	-0.0995591	1.36687	2.38444	1.53992		0.945981						-1.72596	2.73431	-0.207234	2.86813	4.81173	3.10719			-1.72596	2.73431	-0.207234	2.86813	4.81173	3.10719		0.358583		3.32865	3.59702	0.0826395
Q67U26	10.9532	10.2042	11.6435	10.9756	12.3621	10.2246	3	3	6			2.26905	1.13932	2.73053	1.6342	2.46187	1.53751		1.96208						4.74224	2.37797	5.68365	3.42906	4.96797	3.10233			4.74224	2.37797	5.68365	3.42906	4.96797	3.10233		0.509918		-0.434828	0.469744	0.722093
Q8H852	9.45551	9.48754	6.06279	9.72811	11.354	10.223	3	3	6			0.771389	0.422651	-2.85013	0.38667	1.45371	1.53594		0.286705						1.61217	0.882153	-5.93261	0.811358	2.93354	3.09917			1.61217	0.882153	-5.93261	0.811358	2.93354	3.09917		0.171827		3.42745	2.03332	0.244292
Q6ZHZ1	7.78888	10.766	11.5567	11.1609	12.8499	10.2216	3	3	6			-0.895242	1.70114	2.64382	1.81944	2.94965	1.53449		1.62555						-1.87102	3.55061	5.50317	3.81777	5.95229	3.09624			-1.87102	3.55061	5.50317	3.81777	5.95229	3.09624		0.262526		1.89452	1.0946	0.468267
Q336P5	9.06558	8.00214	9.05121	11.3535	11.5361	10.2193	3	3	6			0.381454	-1.06275	0.138285	2.01204	1.63579	1.5322		0.772836						0.797225	-2.21815	0.287844	4.2219	3.30097	3.09161			0.797225	-2.21815	0.287844	4.2219	3.30097	3.09161		0.243746		3.91585	5.87886	0.0169937
Q9LYJ9	5.08313	7.51325	8.48804	7.979	10.3395	10.218	3	3	6			-3.601	-1.55163	-0.424883	-1.36244	0.439251	1.53086		-0.828306						-7.52594	-3.23855	-0.884402	-2.85884	0.886394	3.08892			-7.52594	-3.23855	-0.884402	-2.85884	0.886394	3.08892		0.887314		4.25512	2.4908	0.177908
Q8W4R3	10.0753	11.3991	8.8442	10.8588	9.59634	10.218	3	3	6			1.39122	2.33423	-0.0687199	1.51732	-0.303926	1.53086		1.06683						2.9076	4.87198	-0.143042	3.18382	-0.613313	3.08892			2.9076	4.87198	-0.143042	3.18382	-0.613313	3.08892		0.846773		-0.659036	0.417225	0.748863
Q6Z2T6	7.84423	9.66731	10.5665	8.67041	9.06399	10.2177	3	3	6			-0.839888	0.60242	1.65361	-0.671029	-0.836277	1.53062		0.239909						-1.75533	1.25736	3.44202	-1.40803	-1.68758	3.08843			-1.75533	1.25736	3.44202	-1.40803	-1.68758	3.08843		0.973263		-0.983742	0.57261	0.672399
Q93ZG7	9.06005	12.1098	8.42042	10.3879	9.75251	10.2165	3	3	6			0.375924	3.04488	-0.4925	1.04647	-0.147751	1.52941		0.892739						0.785667	6.35523	-1.02515	2.19583	-0.298156	3.08598			0.785667	6.35523	-1.02515	2.19583	-0.298156	3.08598		0.344383		-0.377363	0.176873	0.884619
Q6EN83	4.52882	8.7267	8.77548	7.49514	8.78826	10.2146	3	3	6			-4.1553	-0.338192	-0.137445	-1.8463	-1.112	1.52747		-1.0103						-8.68442	-0.70587	-0.286094	-3.87413	-2.24399	3.08207			-8.68442	-0.70587	-0.286094	-3.87413	-2.24399	3.08207		0.742946		2.21345	0.847743	0.555653
Q84Z02	10.2726	9.61454	6.36408	9.56803	8.66906	10.2144	3	3	6			1.58851	0.549657	-2.54884	0.226595	-1.2312	1.52735		0.0186768						3.31992	1.14724	-5.30547	0.475468	-2.48453	3.08182			3.31992	1.14724	-5.30547	0.475468	-2.48453	3.08182		0.556372		0.637025	0.243501	0.844693
Q7EXZ2	5.74141	10.6569	10.629	10.8336	11.0889	10.212	3	3	6			-2.94271	1.59198	1.71607	1.49216	1.18866	1.52492		0.761847						-6.15015	3.32277	3.57203	3.13104	2.39867	3.07692			-6.15015	3.32277	3.57203	3.13104	2.39867	3.07692		0.0107848		2.62066	1.00263	0.499089
Q6YZX6	9.83809	9.64847	7.13042	9.15684	11.5193	10.2093	3	3	6			1.15396	0.583578	-1.78251	-0.184596	1.61903	1.52224		0.485284						2.41174	1.21804	-3.71033	-0.387341	3.26714	3.07151			2.41174	1.21804	-3.71033	-0.387341	3.26714	3.07151		0.572717		2.01062	1.26556	0.415937
Q9LRE6	9.37032	9.57935	9.20374	9.36052	10.1557	10.2092	3	3	6			0.686194	0.514467	0.290816	0.0190807	0.255439	1.52212		0.548019						1.43412	1.07379	0.60534	0.0400374	0.515467	3.07127			1.43412	1.07379	0.60534	0.0400374	0.515467	3.07127		0.122025		0.171175	0.203107	0.868677
Q7XSQ5	10.7161	9.61554	10.0974	11.0926	12.287	10.2065	3	3	6			2.03201	0.550651	1.18445	1.75112	2.3867	1.51943		1.57073						4.24682	1.14931	2.46546	3.67441	4.81628	3.06585			4.24682	1.14931	2.46546	3.67441	4.81628	3.06585		0.492579		1.23165	1.73999	0.299372
Q25A68	9.89859	6.53886	7.21694	9.44421	11.209	10.2055	3	3	6			1.21446	-2.52602	-1.69598	0.10277	1.30876	1.51845		-0.0129261						2.53818	-5.27228	-3.53023	0.215645	2.64104	3.06388			2.53818	-5.27228	-3.53023	0.215645	2.64104	3.06388		0.24642		4.06163	2.44685	0.18341
Q7X7E9	11.2886	11.7097	11.0438	12.0286	12.8748	10.2042	3	3	6			2.60451	2.6448	2.13086	2.68716	2.97449	1.51711		2.42649						5.44333	5.52019	4.43542	5.63852	6.00242	3.06117			5.44333	5.52019	4.43542	5.63852	6.00242	3.06117		0.249483		-0.232281	0.275898	0.825936
Q7XRX1	8.26059	6.53773	4.31694	12.0713	8.79074	10.2026	3	3	6			-0.423533	-2.52716	-4.59598	2.72986	-1.10953	1.51552		-0.735136						-0.885168	-5.27465	-9.56663	5.72811	-2.23899	3.05796			-0.885168	-5.27465	-9.56663	5.72811	-2.23899	3.05796		0.932011		7.42451	3.37534	0.0963658
Q6ENH5	9.69446	10.9724	9.78758	8.96379	13.0579	10.198	3	3	6			1.01034	1.90752	0.874653	-0.377645	3.15761	1.51086		1.34722						2.11157	3.98135	1.82061	-0.79242	6.37195	3.04856			2.11157	3.98135	1.82061	-0.79242	6.37195	3.04856		0.193252		0.238186	0.123153	0.918179
Q53LY0	10.8722	12.2406	9.97312	12.2205	10.4195	10.1978	3	3	6			2.18809	3.17567	1.0602	2.87906	0.519274	1.51074		1.88884						4.57302	6.62821	2.20683	6.04119	1.04788	3.04831			4.57302	6.62821	2.20683	6.04119	1.04788	3.04831		0.87332		-1.09023	0.730039	0.602888
Q9LUW6	8.87728	10.6605	10.8013	12.2926	9.47052	10.1957	3	3	6			0.193161	1.59564	1.88838	2.9512	-0.429748	1.50865		1.28455						0.403699	3.33041	3.9307	6.19256	-0.867218	3.04409			0.403699	3.33041	3.9307	6.19256	-0.867218	3.04409		0.443193		0.234875	0.113957	0.92405
Q9LTD8	10.08	8.18686	7.53263	9.68961	9.43962	10.1936	3	3	6			1.39589	-0.87803	-1.38029	0.348176	-0.460642	1.50655		0.0886098						2.91737	-1.83261	-2.87311	0.730585	-0.92956	3.03987			2.91737	-1.83261	-2.87311	0.730585	-0.92956	3.03987		0.588627		1.54308	0.979058	0.507311
Q9ZQR4	9.95726	9.06956	8.20809	9.09226	8.20252	10.1919	3	3	6			1.27314	0.00467007	-0.704835	-0.249182	-1.69775	1.50483		0.0218117						2.66081	0.00974731	-1.46713	-0.522864	-3.426	3.03639			2.66081	0.00974731	-1.46713	-0.522864	-3.426	3.03639		0.589154		-0.705303	0.382508	0.767103
F4INY4	7.43605	9.60207	10.2312	10.9794	13.3052	10.1908	3	3	6			-1.24808	0.537181	1.3183	1.63799	3.40494	1.50372		1.19234						-2.60844	1.1212	2.74406	3.43702	6.87106	3.03415			-2.60844	1.1212	2.74406	3.43702	6.87106	3.03415		0.742365		4.02847	3.13278	0.114009
Q0JKI9	9.68222	11.4758	11.4959	10.0239	10.537	10.1908	3	3	6			0.998099	2.4109	2.58298	0.682456	0.636759	1.50372		1.46915						2.08599	5.03199	5.37653	1.43201	1.28496	3.03415			2.08599	5.03199	5.37653	1.43201	1.28496	3.03415		0.446961		-2.2478	2.93573	0.130694
Q6YYZ1	12.7894	9.41876	12.9302	12.0588	10.4222	10.1829	3	3	6			4.10529	0.353872	4.01731	2.71733	0.521905	1.4958		2.20192						8.5799	0.738598	8.36213	5.70183	1.05319	3.01816			8.5799	0.738598	8.36213	5.70183	1.05319	3.01816		0.428993		-2.63581	1.26486	0.416139
Q6H7U5	10.6991	8.61622	9.16063	11.0887	9.77071	10.1829	3	3	6			2.01493	-0.448669	0.247704	1.74722	-0.129552	1.4958		0.821238						4.21112	-0.936457	0.515602	3.66622	-0.261431	3.01816			4.21112	-0.936457	0.515602	3.66622	-0.261431	3.01816		0.772588		0.877562	0.562962	0.676911
Q93VC3	10.6904	7.58128	8.64721	9.60683	8.01525	10.1829	3	3	6			2.00631	-1.48361	-0.265717	0.265394	-1.88502	1.4958		0.0221927						4.19311	-3.09658	-0.553095	0.556881	-3.8039	3.01816			4.19311	-3.09658	-0.553095	0.556881	-3.8039	3.01816		0.931575		-0.257435	0.0984378	0.934044
Q69KN0	10.8517	11.5705	9.38092	9.06975	10.0543	10.1808	3	3	6			2.16755	2.50563	0.467992	-0.271692	0.154068	1.49369		1.08621						4.53009	5.22973	0.974135	-0.570097	0.310904	3.0139			4.53009	5.22973	0.974135	-0.570097	0.310904	3.0139		0.80225		-2.65975	2.37143	0.193254
Q7Y180	9.09347	7.46091	9.27193	5.92453	9.15896	10.1808	3	3	6			0.409347	-1.60398	0.359006	-3.41691	-0.741302	1.49369		-0.583359						0.85552	-3.34781	0.747279	-7.16977	-1.49592	3.0139			0.85552	-3.34781	0.747279	-7.16977	-1.49592	3.0139		0.361318		-1.30226	0.495071	0.709527
Q75I94	9.39765	7.73701	9.05395	7.053	8.95643	10.1798	3	3	6			0.71353	-1.32788	0.14103	-2.28843	-0.943831	1.49269		-0.368815						1.49125	-2.77153	0.293556	-4.80187	-1.90462	3.0119			1.49125	-2.77153	0.293556	-4.80187	-1.90462	3.0119		0.473008		-0.902623	0.421022	0.746895
Q65XA0	8.02708	8.06883	8.18893	10.6698	10.5221	10.1795	3	3	6			-0.657047	-0.996055	-0.723989	1.32833	0.621826	1.49244		0.177585						-1.3732	-2.07895	-1.507	2.78727	1.25482	3.01139			-1.3732	-2.07895	-1.507	2.78727	1.25482	3.01139		0.266504		4.00421	8.64027	0.00250622
Q0JIZ1	7.74187	9.69804	9.02873	8.72267	10.066	10.1795	3	3	6			-0.942252	0.633158	0.115811	-0.618766	0.16569	1.49244		0.141014						-1.96927	1.32152	0.241064	-1.29837	0.334356	3.01139			-1.96927	1.32152	0.241064	-1.29837	0.334356	3.01139		0.745541		0.818022	0.659152	0.633251
Q75HE5	9.44894	7.18239	6.77136	8.84483	7.09803	10.1785	3	3	6			0.764819	-1.88249	-2.14157	-0.496606	-2.80223	1.49145		-0.844439						1.59844	-3.92912	-4.45771	-1.04204	-5.65481	3.00938			1.59844	-3.92912	-4.45771	-1.04204	-5.65481	3.00938		0.74899		1.03364	0.395301	0.760331
Q0JJ05	11.6233	11.4566	12.0087	14.6997	16.868	10.1774	3	3	6			2.93916	2.39167	3.09579	5.3583	6.96771	1.49033		3.70716						6.14274	4.99187	6.44394	11.2434	14.0606	3.00712			6.14274	4.99187	6.44394	11.2434	14.0606	3.00712		0.0349791		3.57754	1.34526	0.393582
B7EA73	10.0719	9.82378	11.6845	10.6694	12.0373	10.1755	3	3	6			1.38774	0.758894	2.77156	1.32798	2.13701	1.48846		1.64527						2.90033	1.58395	5.76907	2.78652	4.31241	3.00335			2.90033	1.58395	5.76907	2.78652	4.31241	3.00335		0.25907		-0.0503534	0.0417274	0.971491
Q10LP5	10.4778	9.8906	11.1488	8.61051	12.4984	10.1713	3	3	6			1.79364	0.825712	2.23587	-0.730929	2.59816	1.48421		1.36778						3.74863	1.72342	4.65401	-1.53372	5.243	2.99478			3.74863	1.72342	4.65401	-1.53372	5.243	2.99478		0.31789		-1.14067	0.672578	0.627385
Q7XM21	10.2256	11.7583	10.5882	6.71795	9.44803	10.1694	3	3	6			1.54145	2.69346	1.67523	-2.62349	-0.452231	1.48233		0.719458						3.22156	5.62176	3.48702	-5.50491	-0.912588	2.99099			3.22156	5.62176	3.48702	-5.50491	-0.912588	2.99099		0.174749		-5.25229	3.17804	0.110488
A0A0P0VUY4	10.2863	7.8902	9.81041	11.0169	11.2268	10.167	3	3	6			1.6022	-1.17468	0.897487	1.67551	1.32657	1.47995		0.967839						3.34854	-2.45179	1.86814	3.51576	2.67697	2.98618			3.34854	-2.45179	1.86814	3.51576	2.67697	2.98618		0.0388513		2.138	1.54052	0.343762
P0C133	10.1449	10.2542	10.2177	10.2649	10.6581	10.1644	3	3	6			1.46079	1.18931	1.30479	0.923474	0.757857	1.47731		1.18559						3.05299	2.48232	2.71595	1.93774	1.52933	2.98086			3.05299	2.48232	2.71595	1.93774	1.52933	2.98086		0.256166		-0.601111	1.92234	0.263826
Q7XEM4	9.14677	7.42702	10.7312	10.8636	8.78976	10.1634	3	3	6			0.462649	-1.63787	1.81831	1.52221	-1.1105	1.4763		0.42185						0.966919	-3.41854	3.78485	3.19408	-2.24096	2.97883			0.966919	-3.41854	3.78485	3.19408	-2.24096	2.97883		0.836419		0.866238	0.380213	0.768324
Q9SQY0	9.50884	9.40909	8.904	11.4584	10.1232	10.1618	3	3	6			0.824721	0.344207	-0.00892115	2.11697	0.222951	1.47467		0.829099						1.72364	0.718424	-0.0185696	4.44208	0.449908	2.97553			1.72364	0.718424	-0.0185696	4.44208	0.449908	2.97553		0.315867		1.81467	2.14306	0.226398
Q10MX3	10.2294	11.176	10.6296	10.016	10.0887	10.1615	3	3	6			1.5453	2.11116	1.71671	0.674535	0.188391	1.47442		1.28508						3.22961	4.40639	3.57336	1.41539	0.380166	2.97502			3.22961	4.40639	3.57336	1.41539	0.380166	2.97502		0.353363		-2.14626	4.03084	0.0611783
Q0JE32	10.2374	6.83352	9.58058	10.0178	10.9525	10.161	3	3	6			1.55333	-2.23136	0.667655	0.676346	1.05219	1.47391		0.53201						3.24639	-4.65728	1.38974	1.41919	2.12328	2.974			3.24639	-4.65728	1.38974	1.41919	2.12328	2.974		0.0685446		2.1792	1.2509	0.420185
Q0DJ33	9.86374	8.56434	10.8351	9.71749	11.6377	10.1579	3	3	6			1.17961	-0.500547	1.92218	0.376051	1.7374	1.47076		1.03091						2.46535	-1.04474	4.00106	0.789075	3.50602	2.96764			2.46535	-1.04474	4.00106	0.789075	3.50602	2.96764		0.472546		0.613688	0.439006	0.737643
Q69Q02	10.0246	9.6464	8.45039	10.3638	11.9944	10.1567	3	3	6			1.34046	0.58151	-0.462537	1.02237	2.09409	1.46962		1.00759						2.80152	1.21372	-0.962781	2.14526	4.2258	2.96535			2.80152	1.21372	-0.962781	2.14526	4.2258	2.96535		0.470407		2.09465	2.56944	0.16847
Q5JLQ9	10.2369	8.98778	11.1148	12.0008	11.9728	10.1515	3	3	6			1.55273	-0.0771115	2.20186	2.65941	2.07254	1.46443		1.64564						3.24514	-0.160946	4.58322	5.58029	4.18231	2.95487			3.24514	-0.160946	4.58322	5.58029	4.18231	2.95487		0.447703		1.68335	1.50261	0.352915
P42863	10.6388	10.726	9.60368	10.4606	9.14552	10.1492	3	3	6			1.95467	1.66116	0.690759	1.11912	-0.75474	1.46215		1.02219						4.0852	3.46715	1.43783	2.34827	-1.52304	2.95026			4.0852	3.46715	1.43783	2.34827	-1.52304	2.95026		0.491105		-1.73823	1.54786	0.342017
Q84KJ3	9.63912	8.9521	8.46442	8.585	12.7372	10.1486	3	3	6			0.955	-0.112787	-0.4485	-0.756437	2.83696	1.46151		0.655958						1.99591	-0.235407	-0.933563	-1.58725	5.7249	2.94898			1.99591	-0.235407	-0.933563	-1.58725	5.7249	2.94898		0.293283		2.08656	1.26222	0.416902
Q6YVM4	8.50978	9.40771	8.92796	8.52152	9.20144	10.1452	3	3	6			-0.174348	0.342827	0.0150322	-0.819915	-0.698827	1.45807		0.0204737						-0.364381	0.715544	0.0312899	-1.72044	-1.41021	2.94205			-0.364381	0.715544	0.0312899	-1.72044	-1.41021	2.94205		0.0841472		-0.190354	0.140095	0.907459
Q852M4	10.3519	10.9715	9.70922	10.3038	11.3423	10.1441	3	3	6			1.66781	1.90658	0.796298	0.962344	1.44203	1.45705		1.37202						3.48566	3.9794	1.65751	2.0193	2.90997	2.93999			3.48566	3.9794	1.65751	2.0193	2.90997	2.93999		0.309232		-0.417768	0.70041	0.615397
Q0IY07	10.9038	9.91855	12.6766	11.8142	13.8242	10.1397	3	3	6			2.21968	0.853663	3.76363	2.47274	3.9239	1.45259		2.4477						4.63905	1.78176	7.83407	5.18861	7.9183	2.93097			4.63905	1.78176	7.83407	5.18861	7.9183	2.93097		0.809777		0.594333	0.311048	0.806056
Q7XKQ8	10.6445	10.3783	3.70199	10.6466	1.65526	10.136	3	3	6			1.96036	1.31341	-5.21093	1.30521	-8.245	1.44887		-1.23801						4.09709	2.74133	-10.8467	2.73875	-16.6382	2.92348			4.09709	2.74133	-10.8467	2.73875	-16.6382	2.92348		0.701725		-2.32256	0.344801	0.787417
Q65WY8	4.02166	9.38875	10.1872	9.15778	10.9563	10.1358	3	3	6			-4.66247	0.323862	1.2743	-0.183661	1.05604	1.44874		-0.123863						-9.74438	0.675961	2.65249	-0.385379	2.13105	2.92322			-9.74438	0.675961	2.65249	-0.385379	2.13105	2.92322		0.126069		3.69494	1.3041	0.404975
Q9SNN8	8.90259	11.4718	9.08635	12.5928	13.5043	10.1349	3	3	6			0.218463	2.40689	0.173425	3.25139	3.60406	1.44785		1.85035						0.456579	5.02363	0.360988	6.82246	7.27287	2.92141			0.456579	5.02363	0.360988	6.82246	7.27287	2.92141		0.892793		3.72518	2.77617	0.145979
Q9M0R4	7.78529	8.4501	9.05368	10.2748	11.9345	10.134	3	3	6			-0.898834	-0.614789	0.140758	0.933407	2.03424	1.44695		0.506954						-1.87853	-1.28318	0.292991	1.95859	4.10502	2.9196			-1.87853	-1.28318	0.292991	1.95859	4.10502	2.9196		0.957331		3.95064	6.422	0.0116623
Q6ENI1	11.2135	11.6004	10.6267	10.7148	12.7519	10.1263	3	3	6			2.52935	2.53549	1.71379	1.37332	2.85168	1.43922		2.07381						5.28624	5.29204	3.56729	2.88167	5.75459	2.90401			5.28624	5.29204	3.56729	2.88167	5.75459	2.90401		0.531574		-0.868432	1.06209	0.478936
Q84S18	6.94872	9.76911	8.59309	10.4828	11.6136	10.1263	3	3	6			-1.73541	0.704223	-0.319831	1.14137	1.71329	1.43922		0.490479						-3.62693	1.46985	-0.665735	2.39496	3.45737	2.90401			-3.62693	1.46985	-0.665735	2.39496	3.45737	2.90401		0.0826359		3.85972	3.99283	0.0628114
Q7XUR2	10.8842	9.54404	9.49392	10.4503	10.256	10.1226	3	3	6			2.20012	0.47915	0.580992	1.10885	0.355708	1.43548		1.02672						4.59817	1.00008	1.20935	2.32671	0.717807	2.89645			4.59817	1.00008	1.20935	2.32671	0.717807	2.89645		0.476733		-0.288877	0.25256	0.839406
Q75I13	7.73904	7.06835	9.18403	6.16452	6.57256	10.1223	3	3	6			-0.945085	-1.99654	0.271109	-3.17691	-3.32771	1.43522		-1.28999						-1.97519	-4.16715	0.564319	-6.66618	-6.71521	2.89593			-1.97519	-4.16715	0.564319	-6.66618	-6.71521	2.89593		0.309409		-1.63581	0.594194	0.662414
Q5VRI5	6.18692	9.54156	10.7758	9.63777	9.82021	10.1217	3	3	6			-2.49721	0.476674	1.86285	0.296329	-0.0800541	1.43457		0.24886						-5.21907	0.994909	3.87756	0.621792	-0.161547	2.89462			-5.21907	0.994909	3.87756	0.621792	-0.161547	2.89462		0.208845		1.23382	0.543751	0.685985
Q0IQK9	7.97631	9.04289	9.22612	10.0265	10.2802	10.1215	3	3	6			-0.707817	-0.0219966	0.3132	0.685086	0.379926	1.43444		0.34714						-1.47931	-0.045911	0.651932	1.43753	0.766678	2.89436			-1.47931	-0.045911	0.651932	1.43753	0.766678	2.89436		0.9989		1.99062	3.50023	0.0883744
Q761Z9	9.71987	9.10554	10.953	10.1381	11.4257	10.1214	3	3	6			1.03574	0.0406548	2.04004	0.796707	1.52548	1.43431		1.14549						2.16467	0.0848542	4.24638	1.67174	3.07836	2.8941			2.16467	0.0848542	4.24638	1.67174	3.07836	2.8941		0.237868		0.382767	0.358863	0.779779
Q0JEZ8	11.0817	10.4824	9.00251	13.592	11.0774	10.121	3	3	6			2.39756	1.41752	0.0895822	4.25055	1.17715	1.43392		1.79438						5.01081	2.95863	0.186467	8.91902	2.37545	2.89331			5.01081	2.95863	0.186467	8.91902	2.37545	2.89331		0.613979		2.01063	1.08896	0.470099
Q8H936	11.967	8.81484	10.5941	7.62826	5.97042	10.1206	3	3	6			3.28292	-0.250048	1.68121	-1.71317	-3.92985	1.43353		0.0840999						6.86118	-0.521898	3.49948	-3.59479	-7.93031	2.89253			6.86118	-0.521898	3.49948	-3.59479	-7.93031	2.89253		0.630638		-6.15711	2.46964	0.180537
Q5NBN9	9.74003	11.1228	10.3548	9.18075	9.83987	10.1191	3	3	6			1.05591	2.05788	1.44188	-0.160683	-0.0603999	1.43198		0.961093						2.20681	4.29517	3.0013	-0.337164	-0.121885	2.88939			2.20681	4.29517	3.0013	-0.337164	-0.121885	2.88939		0.509068		-2.35765	3.03123	0.122323
Q9CAI7	8.66541	5.93595	4.95889	11.8052	4.89695	10.1173	3	3	6			-0.0187163	-3.12893	-3.95403	2.46374	-5.00332	1.43016		-1.36852						-0.0391163	-6.53067	-8.23041	5.16972	-10.0965	2.88572			-0.0391163	-6.53067	-8.23041	5.16972	-10.0965	2.88572		0.432137		4.25304	1.08121	0.472633
Q75K81	10.8455	12.0067	9.51414	10.7636	6.69418	10.1165	3	3	6			2.16137	2.94179	0.601219	1.42219	-3.20608	1.42938		0.891644						4.51717	6.14007	1.25145	2.98421	-6.46977	2.88415			4.51717	6.14007	1.25145	2.98421	-6.46977	2.88415		0.347507		-4.17003	1.77014	0.293179
Q6H795	11.5694	10.9638	10.8284	13.1206	13.8434	10.1158	3	3	6			2.88531	1.89888	1.91545	3.77919	3.94317	1.42873		2.64179						6.03018	3.96331	3.98705	7.92995	7.95718	2.88284			6.03018	3.96331	3.98705	7.92995	7.95718	2.88284		0.28312		1.59647	1.21733	0.430078
Q7XRH8	5.1364	10.6171	12.1486	11.7331	13.9306	10.1131	3	3	6			-3.54773	1.55221	3.23565	2.39171	4.03029	1.426		1.51469						-7.41461	3.23976	6.73507	5.01856	8.13299	2.87732			-7.41461	3.23976	6.73507	5.01856	8.13299	2.87732		0.227844		4.48955	1.40788	0.376865
Q941T1	9.62297	10.0853	9.36466	10.5843	11.6372	10.1077	3	3	6			0.938844	1.02045	0.451737	1.24287	1.7369	1.42065		1.13524						1.96215	2.12988	0.940299	2.60793	3.50501	2.86653			1.96215	2.12988	0.940299	2.60793	3.50501	2.86653		0.679265		1.31572	4.46799	0.0451857
Q9LZQ9	8.07178	8.62746	8.99534	10.5715	11.3405	10.1036	3	3	6			-0.612339	-0.437426	0.0824197	1.23003	1.4402	1.41646		0.51989						-1.27977	-0.912991	0.171558	2.581	2.90627	2.85807			-1.27977	-0.912991	0.171558	2.581	2.90627	2.85807		0.102663		3.45551	9.36911	0.00151223
Q0DHC4	10.3534	8.09292	9.26383	11.2107	9.82526	10.1021	3	3	6			1.66924	-0.971971	0.350909	1.8693	-0.0750041	1.41501		0.709581						3.48866	-2.02869	0.730425	3.92238	-0.151356	2.85516			3.48866	-2.02869	0.730425	3.92238	-0.151356	2.85516		0.739239		1.4786	0.994318	0.501973
A3BFT0	11.1959	9.72474	11.2626	10.6163	12.0016	10.1001	3	3	6			2.51174	0.659848	2.34964	1.27484	2.10132	1.41304		1.7184						5.24944	1.37723	4.89083	2.67501	4.24039	2.85118			5.24944	1.37723	4.89083	2.67501	4.24039	2.85118		0.276753		-0.583636	0.54871	0.683631
Q67UE2	6.79403	10.1385	8.60825	10.4503	8.668	10.0975	3	3	6			-1.8901	1.07364	-0.304669	1.10885	-1.23227	1.41041		0.0276443						-3.95023	2.24089	-0.634174	2.32671	-2.48667	2.84588			-3.95023	2.24089	-0.634174	2.32671	-2.48667	2.84588		0.947766		1.67648	0.905285	0.533927
Q75LL2	9.53642	11.331	10.2183	12.3792	11.5716	10.0963	3	3	6			0.852299	2.26609	1.3054	3.03772	1.6713	1.40923		1.75701						1.78127	4.72975	2.71721	6.37412	3.37263	2.84348			1.78127	4.72975	2.71721	6.37412	3.37263	2.84348		0.770043		1.12066	1.09285	0.468833
Q9FDY4	10.9782	10.1876	10.0656	9.21415	10.6253	10.0961	3	3	6			2.29409	1.12271	1.15263	-0.127288	0.725079	1.40896		1.09603						4.79455	2.34331	2.39922	-0.267091	1.46318	2.84295			4.79455	2.34331	2.39922	-0.267091	1.46318	2.84295		0.89283		-1.83268	2.29194	0.204201
Q84UQ1	11.8269	10.6448	11.5617	9.81271	10.1353	10.0959	3	3	6			3.14278	1.57996	2.64875	0.47127	0.23506	1.40883		1.58111						6.5683	3.29767	5.51342	0.988874	0.474342	2.84268			6.5683	3.29767	5.51342	0.988874	0.474342	2.84268		0.715369		-3.69116	4.74423	0.0373118
Q7GCL7	10.983	8.92647	8.91376	10.1062	7.9978	10.0959	3	3	6			2.29887	-0.138413	0.000833617	0.764733	-1.90246	1.40883		0.405398						4.80455	-0.288894	0.00173519	1.60465	-3.83911	2.84268			4.80455	-0.288894	0.00173519	1.60465	-3.83911	2.84268		0.786091		-1.30305	0.628653	0.64678
Q8H8K7	8.65134	9.83881	9.36295	9.52957	11.7172	10.0954	3	3	6			-0.0327845	0.773923	0.450029	0.18813	1.8169	1.4083		0.767416						-0.0685183	1.61532	0.936744	0.394757	3.66644	2.84162			-0.0685183	1.61532	0.936744	0.394757	3.66644	2.84162		0.397306		1.47309	1.99647	0.250612
Q7XAP4	8.63401	11.192	9.24743	9.59376	11.1821	10.0929	3	3	6			-0.0501109	2.1271	0.334506	0.252327	1.28188	1.4058		0.891916						-0.10473	4.43965	0.696281	0.529463	2.58679	2.83656			-0.10473	4.43965	0.696281	0.529463	2.58679	2.83656		0.42818		0.307205	0.225509	0.855293
Q67UR2	9.31295	9.31601	9.41549	10.7787	11.1623	10.0896	3	3	6			0.628828	0.251123	0.502565	1.4373	1.262	1.40249		0.91405						1.31423	0.524141	1.0461	3.01591	2.54668	2.82989			1.31423	0.524141	1.0461	3.01591	2.54668	2.82989		0.513965		1.836	8.69482	0.00241323
Q2R3F5	11.2401	11.3521	11.0865	11.7561	9.25984	10.0896	3	3	6			2.55601	2.28721	2.17354	2.41462	-0.640428	1.40249		1.69891						5.34197	4.77384	4.52428	5.06664	-1.29236	2.82989			5.34197	4.77384	4.52428	5.06664	-1.29236	2.82989		0.0331933		-2.67864	1.8055	0.286082
Q53RH0	9.90179	7.24726	9.02459	12.0164	7.46361	10.0871	3	3	6			1.21766	-1.81762	0.111662	2.67499	-2.43666	1.39997		0.191667						2.54487	-3.79372	0.232427	5.61298	-4.9171	2.82481			2.54487	-3.79372	0.232427	5.61298	-4.9171	2.82481		0.513755		1.51237	0.514202	0.70018
Q6ATB4	9.88464	8.88056	7.20496	9.23573	9.92915	10.0864	3	3	6			1.20052	-0.184324	-1.70796	-0.10571	0.0288898	1.39931		0.10512						2.50904	-0.384719	-3.55516	-0.221814	0.0582987	2.82347			2.50904	-0.384719	-3.55516	-0.221814	0.0582987	2.82347		0.47088		1.3636	0.906891	0.533333
Q60DY1	9.15086	7.37295	9.53914	8.49813	9.45234	10.0844	3	3	6			0.466741	-1.69194	0.626216	-0.843306	-0.447921	1.39732		-0.0821482						0.975471	-3.53139	1.30348	-1.76953	-0.90389	2.81945			0.975471	-3.53139	1.30348	-1.76953	-0.90389	2.81945		0.897768		0.466157	0.25965	0.835291
Q6ZC69	7.59753	8.74073	8.42622	7.30342	10.9747	10.0841	3	3	6			-1.08659	-0.324162	-0.486701	-2.03802	1.07444	1.39705		-0.243998						-2.27094	-0.676587	-1.01308	-4.27642	2.16818	2.81891			-2.27094	-0.676587	-1.01308	-4.27642	2.16818	2.81891		0.0877873		1.55709	0.893798	0.538195
Q75M35	9.55974	12.866	6.87369	10.9353	11.4184	10.0787	3	3	6			0.875617	3.80108	-2.03923	1.59388	1.51811	1.39159		1.19017						1.83001	7.93356	-4.24471	3.34446	3.06351	2.8079			1.83001	7.93356	-4.24471	3.34446	3.06351	2.8079		0.00387771		1.23233	0.396842	0.759519
Q5Z6B1	10.5526	9.78247	8.74883	8.7384	8.73264	10.0784	3	3	6			1.86845	0.717587	-0.164093	-0.603041	-1.16762	1.39132		0.340434						3.90499	1.49774	-0.341564	-1.26537	-2.35622	2.80736			3.90499	1.49774	-0.341564	-1.26537	-2.35622	2.80736		0.759547		-1.95847	1.38886	0.381866
Q7XKA8	9.24769	9.77345	7.9046	10.0359	13.8328	10.0771	3	3	6			0.563567	0.708565	-1.00832	0.694462	3.93253	1.38999		1.0468						1.17783	1.47891	-2.09884	1.4572	7.93571	2.80467			1.17783	1.47891	-2.09884	1.4572	7.93571	2.80467		0.504097		3.87989	2.60538	0.164325
Q8RUV9	8.91525	10.1124	9.63399	11.2514	10.4148	10.0769	3	3	6			0.231129	1.04755	0.721071	1.90999	0.514526	1.38986		0.96902						0.48305	2.18644	1.50092	4.00776	1.0383	2.8044			0.48305	2.18644	1.50092	4.00776	1.0383	2.8044		0.495438		1.22668	1.81192	0.284811
Q7F1X5	10.228	7.87995	9.42893	10.3628	9.62447	10.0768	3	3	6			1.54385	-1.18494	0.516002	1.02138	-0.275799	1.38972		0.501704						3.22659	-2.47318	1.07407	2.14319	-0.556552	2.80413			3.22659	-2.47318	1.07407	2.14319	-0.556552	2.80413		0.553511		0.854428	0.546917	0.684481
Q0JFZ0	6.83137	9.52797	7.54319	12.4645	10.833	10.0764	3	3	6			-1.85275	0.463079	-1.36974	3.12308	0.932783	1.38932		0.447629						-3.87218	0.966532	-2.85114	6.55323	1.88233	2.80332			-3.87218	0.966532	-2.85114	6.55323	1.88233	2.80332		0.969601		5.66522	4.29979	0.0507732
Q9C878	8.24222	8.86576	8.42635	10.4733	10.239	10.0715	3	3	6			-0.441902	-0.199123	-0.486575	1.13186	0.338737	1.38437		0.287895						-0.923558	-0.415607	-1.01282	2.37501	0.68356	2.79333			-0.923558	-0.415607	-1.01282	2.37501	0.68356	2.79333		0.153553		2.73463	6.04246	0.0151719
Q7XUU0	8.54554	10.0869	9.56982	8.63423	9.40765	10.069	3	3	6			-0.13858	1.02205	0.656894	-0.707207	-0.492615	1.38195		0.287082						-0.289626	2.1332	1.36734	-1.48395	-0.994081	2.78845			-0.289626	2.1332	1.36734	-1.48395	-0.994081	2.78845		0.438166		-0.966829	0.833499	0.561166
Q0D3C8	8.41049	7.36711	9.21427	8.10769	11.6842	10.0651	3	3	6			-0.27363	-1.69778	0.301347	-1.23375	1.78391	1.37805		0.0430261						-0.571875	-3.54358	0.62726	-2.5888	3.59988	2.78058			-0.571875	-3.54358	0.62726	-2.5888	3.59988	2.78058		0.579575		2.42662	1.50855	0.351464
Q6ZH45	9.26857	10.7655	9.96895	6.50297	12.1541	10.0638	3	3	6			0.584442	1.70065	1.05603	-2.83847	2.25379	1.37671		0.688858						1.22146	3.54957	2.19815	-5.95602	4.54808	2.77786			1.22146	3.54957	2.19815	-5.95602	4.54808	2.77786		0.0828524		-1.86642	0.728314	0.603609
Q0DJC5	10.8694	10.5646	8.01156	12.4019	12.5397	10.0627	3	3	6			2.18532	1.49974	-0.901361	3.06048	2.63945	1.37563		1.64321						4.56723	3.13024	-1.8762	6.42187	5.32633	2.77569			4.56723	3.13024	-1.8762	6.42187	5.32633	2.77569		0.468514		2.90087	1.92415	0.263496
Q10S44	9.51796	8.482	10.3048	8.96356	10.9136	10.0614	3	3	6			0.833841	-0.582886	1.39188	-0.377876	1.0133	1.37428		0.608756						1.7427	-1.21659	2.89724	-0.792905	2.0448	2.77296			1.7427	-1.21659	2.89724	-0.792905	2.0448	2.77296		0.881692		0.200507	0.13845	0.908495
Q6AVZ9	10.0997	10.0806	9.00529	10.0739	8.93849	10.0598	3	3	6			1.41562	1.01566	0.0923642	0.732437	-0.961773	1.37266		0.611161						2.95859	2.11988	0.192258	1.53689	-1.94083	2.76969			2.95859	2.11988	0.192258	1.53689	-1.94083	2.76969		0.504302		-0.968326	0.774407	0.584629
Q2QMT7	11.5319	11.016	9.52427	10.1008	9.854	10.0587	3	3	6			2.84779	1.95109	0.611344	0.759357	-0.0462694	1.37157		1.24915						5.95178	4.07228	1.27253	1.59337	-0.0933701	2.76751			5.95178	4.07228	1.27253	1.59337	-0.0933701	2.76751		0.543333		-2.34302	2.21568	0.215285
Q8W3E8	8.95262	11.0357	9.64915	11.6974	9.77451	10.0573	3	3	6			0.268502	1.97081	0.736225	2.35596	-0.125758	1.37022		1.09599						0.561158	4.11344	1.53247	4.94357	-0.253775	2.76478			0.561158	4.11344	1.53247	4.94357	-0.253775	2.76478		0.66204		0.415835	0.264497	0.832489
Q5W727	4.58376	9.78875	8.63325	9.00529	10.068	10.055	3	3	6			-4.10036	0.723864	-0.279674	-0.33615	0.167707	1.36792		-0.40945						-8.5696	1.51084	-0.582147	-0.705349	0.338427	2.76013			-8.5696	1.51084	-0.582147	-0.705349	0.338427	2.76013		0.20093		3.34471	1.47383	0.360025
Q7XSK2	10.5386	10.2514	8.42345	10.0093	11.6348	10.052	3	3	6			1.85445	1.18648	-0.489471	0.667832	1.73455	1.36493		1.05313						3.87574	2.4764	-1.01884	1.40132	3.50026	2.75411			3.87574	2.4764	-1.01884	1.40132	3.50026	2.75411		0.302389		0.774131	0.62197	0.649783
B9FI63	11.0365	8.11744	9.98185	8.95638	10.9811	10.0511	3	3	6			2.35239	-0.947452	1.06893	-0.385061	1.08087	1.36398		0.755611						4.91641	-1.97751	2.225	-0.807981	2.18117	2.75219			4.91641	-1.97751	2.225	-0.807981	2.18117	2.75219		0.464906		-0.346176	0.17276	0.887144
Q2QZF2	11.3944	10.4913	9.35244	11.4644	11.6817	10.0494	3	3	6			2.71023	1.42636	0.439517	2.12301	1.78146	1.36235		1.64049						5.66428	2.97709	0.914864	4.45475	3.59492	2.74889			5.66428	2.97709	0.914864	4.45475	3.59492	2.74889		0.227369		0.414107	0.338549	0.790837
Q5QNI1	10.6425	5.42324	11.112	9.67446	11.3065	10.0493	3	3	6			1.95838	-3.64165	2.19913	0.33302	1.40625	1.36221		0.60289						4.09294	-7.6008	4.57753	0.698782	2.83777	2.74862			4.09294	-7.6008	4.57753	0.698782	2.83777	2.74862		0.059747		1.7385	0.536853	0.689273
A2XD08	9.36003	10.5565	10.446	5.32131	9.12807	10.0486	3	3	6			0.675912	1.49162	1.53313	-4.02012	-0.772193	1.36153		0.0449783						1.41263	3.11329	3.19123	-8.4355	-1.55826	2.74724			1.41263	3.11329	3.19123	-8.4355	-1.55826	2.74724		0.0615565		-4.98789	2.27883	0.206065
Q2QYL3	6.98493	8.13822	8.64216	10.34	11.2596	10.0473	3	3	6			-1.69919	-0.926667	-0.270763	0.998524	1.3593	1.36017		0.136895						-3.55125	-1.93413	-0.5636	2.09522	2.74303	2.74449			-3.55125	-1.93413	-0.5636	2.09522	2.74303	2.74449		0.117975		4.5439	7.16704	0.00695833
Q68Y48	8.41891	13.1064	9.2006	10.8127	8.52215	10.043	3	3	6			-0.265217	4.04151	0.287681	1.4713	-1.37812	1.35593		0.918849						-0.554292	8.4354	0.598814	3.08726	-2.78099	2.73595			-0.554292	8.4354	0.598814	3.08726	-2.78099	2.73595		0.62331		-1.81257	0.68366	0.622584
Q67V61	7.43329	11.3491	10.1998	11.2143	11.1567	10.0403	3	3	6			-1.25083	2.28423	1.28687	1.87282	1.25645	1.3532		1.13379						-2.61419	4.76761	2.67865	3.92978	2.53548	2.73043			-2.61419	4.76761	2.67865	3.92978	2.53548	2.73043		0.075768		1.45453	0.858673	0.551459
Q6Z7B0	11.4714	12.2719	11.8644	9.41861	12.5493	10.0402	3	3	6			2.78725	3.20698	2.95146	0.0771744	2.64904	1.35306		2.17083						5.82524	6.69358	6.14352	0.161937	5.34567	2.73015			5.82524	6.69358	6.14352	0.161937	5.34567	2.73015		0.0558476		-3.47486	3.57503	0.083909
Q69IM9	12.9696	9.15598	10.4717	10.0188	11.3289	10.0402	3	3	6			4.2855	0.0910948	1.55875	0.677319	1.42863	1.35306		1.56573						8.95652	0.190132	3.24457	1.42123	2.88294	2.73015			8.95652	0.190132	3.24457	1.42123	2.88294	2.73015		0.0631436		-1.78564	0.911708	0.531556
Q8S2G0	6.96475	7.03188	4.45707	4.98941	11.2084	10.0397	3	3	6			-1.71938	-2.03301	-4.45585	-4.35203	1.30815	1.35265		-1.64991						-3.59343	-4.24327	-9.27496	-9.13194	2.63981	2.72932			-3.59343	-4.24327	-9.27496	-9.13194	2.63981	2.72932		0.344034		4.44962	1.4656	0.362084
A2WNF5	10.271	11.1406	10.5079	11.2305	11.3707	10.0386	3	3	6			1.58687	2.07569	1.59497	1.88906	1.47048	1.35155		1.66144						3.3165	4.33235	3.31996	3.96386	2.96737	2.72711			3.3165	4.33235	3.31996	3.96386	2.96737	2.72711		0.887132		-0.436825	1.1911	0.437969
Q7XC57	9.52474	8.2328	10.3786	7.85237	11.5729	10.0377	3	3	6			0.840614	-0.832082	1.4657	-1.48906	1.67267	1.35059		0.501404						1.75685	-1.73671	3.05088	-3.12453	3.3754	2.72517			1.75685	-1.73671	3.05088	-3.12453	3.3754	2.72517		0.647376		-0.0316604	0.0136952	0.990552
Q10Q08	8.72789	9.11577	9.13062	10.1434	10.6466	10.0345	3	3	6			0.0437632	0.0508849	0.217699	0.801946	0.746294	1.34743		0.534669						0.0914634	0.106206	0.453144	1.68274	1.506	2.71879			0.0914634	0.106206	0.453144	1.68274	1.506	2.71879		0.177859		1.75224	6.44257	0.0114972
A2WLS0	9.81065	9.60676	9.59991	9.47444	10.4041	10.0327	3	3	6			1.12653	0.54187	0.686989	0.132999	0.503812	1.34564		0.722973						2.3544	1.13098	1.42998	0.279074	1.01668	2.71518			2.3544	1.13098	1.42998	0.279074	1.01668	2.71518		0.413527		-0.301478	0.456866	0.728567
Q8GSQ1	10.1476	9.57973	11.0023	10.2046	9.32874	10.0296	3	3	6			1.46346	0.514844	2.0894	0.863134	-0.571523	1.34247		0.950298						3.05858	1.07458	4.34913	1.81113	-1.15331	2.70878			3.05858	1.07458	4.34913	1.81113	-1.15331	2.70878		0.799554		-1.70523	1.64009	0.320836
H2KWF1	8.47877	4.00746	10.8097	10.2469	11.1518	10.0293	3	3	6			-0.205354	-5.05742	1.89676	0.905422	1.25158	1.34219		0.0221966						-0.429181	-10.5558	3.94815	1.89986	2.52564	2.70823			-0.429181	-10.5558	3.94815	1.89986	2.52564	2.70823		0.00647381		4.72352	1.37286	0.386126
Q75GI4	7.8399	8.96483	6.04306	8.30424	10.5945	10.029	3	3	6			-0.844227	-0.100055	-2.86986	-1.0372	0.694246	1.34192		-0.469197						-1.7644	-0.208834	-5.97368	-2.17638	1.40097	2.70767			-1.7644	-0.208834	-5.97368	-2.17638	1.40097	2.70767		0.83634		3.29306	2.195	0.218393
Q0DXZ1	8.65707	11.4908	10.0965	8.49049	11.3269	10.0271	3	3	6			-0.027055	2.42591	1.18353	-0.850947	1.42667	1.33998		0.916349						-0.0565438	5.06334	2.46354	-1.78556	2.87897	2.70377			-0.0565438	5.06334	2.46354	-1.78556	2.87897	2.70377		0.967764		-1.22438	0.748247	0.595326
Q0JHU7	9.25342	10.3485	9.05395	9.57482	10.8211	10.0264	3	3	6			0.569299	1.28362	0.14103	0.233383	0.920791	1.33929		0.747902						1.18981	2.67916	0.293556	0.489713	1.85813	2.70237			1.18981	2.67916	0.293556	0.489713	1.85813	2.70237		0.923962		0.295896	0.375845	0.770654
Q9SF41	10.3572	11.3699	10.2074	10.85	13.7357	10.0256	3	3	6			1.6731	2.30498	1.29446	1.50852	3.8354	1.33846		1.99249						3.49671	4.81093	2.69444	3.16535	7.73971	2.7007			3.49671	4.81093	2.69444	3.16535	7.73971	2.7007		0.256651		0.867888	0.642104	0.640778
Q7XT08	9.16267	10.7284	8.36803	12.3989	10.1829	10.025	3	3	6			0.478545	1.66354	-0.544897	3.05741	0.282626	1.33791		1.04586						1.00014	3.47213	-1.13422	6.41543	0.57033	2.69958			1.00014	3.47213	-1.13422	6.41543	0.57033	2.69958		0.755639		2.11576	1.38146	0.38383
Q85435	11.4985	9.20682	9.18354	9.94993	10.0784	10.0244	3	3	6			2.81438	0.141932	0.270613	0.608492	0.178153	1.33735		0.89182						5.88194	0.296239	0.563286	1.27681	0.359506	2.69846			5.88194	0.296239	0.563286	1.27681	0.359506	2.69846		0.245483		-0.802229	0.513051	0.700739
B9F3B6	9.53832	7.40284	10.0672	9.0614	9.96136	10.0239	3	3	6			0.854201	-1.66205	1.15424	-0.280039	0.0610979	1.3368		0.244043						1.78525	-3.469	2.40258	-0.587611	0.123294	2.69734			1.78525	-3.469	2.40258	-0.587611	0.123294	2.69734		0.445901		0.504733	0.281094	0.822967
Q75J39	10.2912	11.6641	9.10415	9.674	11.9713	10.0233	3	3	6			1.60705	2.59925	0.19123	0.332561	2.07103	1.33624		1.35623						3.35867	5.42512	0.398049	0.697819	4.17927	2.69622			3.35867	5.42512	0.398049	0.697819	4.17927	2.69622		0.646887		-0.536176	0.363121	0.777481
Q7XPE8	9.40706	8.78247	10.0925	10.5661	10.1976	10.0217	3	3	6			0.722932	-0.282413	1.17957	1.22471	0.29732	1.33458		0.746117						1.5109	-0.589449	2.4553	2.56984	0.599983	2.69287			1.5109	-0.589449	2.4553	2.56984	0.599983	2.69287		0.72436		0.828645	0.991808	0.502847
Q7XD82	7.75609	8.37855	9.94654	9.23422	11.5957	10.0211	3	3	6			-0.928034	-0.686332	1.03362	-0.107219	1.69541	1.33402		0.390245						-1.93956	-1.4325	2.1515	-0.224979	3.42129	2.69174			-1.93956	-1.4325	2.1515	-0.224979	3.42129	2.69174		0.85617		2.36954	2.0808	0.236383
Q6ZF85	9.4412	10.8311	9.07716	8.07783	10.0749	10.021	3	3	6			0.757078	1.76618	0.164239	-1.26361	0.174679	1.33389		0.488743						1.58226	3.68635	0.341868	-2.65145	0.352497	2.69146			1.58226	3.68635	0.341868	-2.65145	0.352497	2.69146		0.569883		-1.73933	1.33864	0.395392
Q5JKW1	11.5198	10.7711	11.4386	12.2536	12.486	10.0133	3	3	6			2.83566	1.70619	2.52566	2.91217	2.58574	1.32623		2.31528						5.92642	3.56114	5.25722	6.11067	5.21794	2.67601			5.92642	3.56114	5.25722	6.11067	5.21794	2.67601		0.637662		-0.246717	0.22977	0.852771
Q0JJZ6	7.72724	10.0832	7.50136	8.29218	6.67596	10.013	3	3	6			-0.956883	1.01833	-1.41156	-1.04925	-3.22431	1.32595		-0.716289						-1.99985	2.12544	-2.9382	-2.20167	-6.50655	2.67545			-1.99985	2.12544	-2.9382	-2.20167	-6.50655	2.67545		0.511722		-1.07339	0.425436	0.744614
Q7XPY2	9.97885	12.4777	10.6015	10.8658	12.2132	10.0123	3	3	6			1.29473	3.41277	1.68857	1.52437	2.3129	1.32525		1.92643						2.70594	7.12309	3.51479	3.19862	4.66736	2.67404			2.70594	7.12309	3.51479	3.19862	4.66736	2.67404		0.323592		-0.9346	0.829345	0.562785
Q2R1V8	10.431	10.8094	9.22456	11.0002	10.9181	10.0098	3	3	6			1.74685	1.74448	0.311633	1.65877	1.01785	1.32273		1.30039						3.65085	3.64106	0.648671	3.48064	2.05399	2.66896			3.65085	3.64106	0.648671	3.48064	2.05399	2.66896		0.292047		0.087672	0.0903966	0.939265
Q75HA6	10.0244	10.1546	8.60073	4.854	8.73529	10.0079	3	3	6			1.34032	1.08968	-0.312193	-4.48744	-1.16498	1.32077		-0.368973						2.80123	2.27436	-0.649836	-9.41609	-2.35089	2.66501			2.80123	2.27436	-0.649836	-9.41609	-2.35089	2.66501		0.171556		-4.50924	1.8061	0.285962
B5X570	11.1306	9.72514	9.97985	12.3048	10.6782	10.0074	3	3	6			2.44645	0.660258	1.06693	2.96334	0.777983	1.32035		1.53922						5.11298	1.37808	2.22084	6.21804	1.56994	2.66416			5.11298	1.37808	2.22084	6.21804	1.56994	2.66416		0.78774		0.58008	0.389007	0.763655
Q65XV7	9.3771	10.8446	8.70594	9.57913	7.04996	10.0066	3	3	6			0.692979	1.77974	-0.20698	0.23769	-2.85031	1.31951		0.162106						1.4483	3.71465	-0.430833	0.49875	-5.75183	2.66246			1.4483	3.71465	-0.430833	0.49875	-5.75183	2.66246		0.368259		-2.44091	1.21268	0.431466
Q8H7S7	7.61537	13.108	9.77345	7.89676	12.6288	10.006	3	3	6			-1.06875	4.04313	0.860529	-1.44468	2.7285	1.31895		1.07295						-2.23365	8.43877	1.79121	-3.0314	5.50602	2.66133			-2.23365	8.43877	1.79121	-3.0314	5.50602	2.66133		0.788294		-0.953461	0.28066	0.823214
Q8S2G4	8.90563	8.20975	10.4046	9.69378	11.4035	10.0053	3	3	6			0.221504	-0.855141	1.49169	0.352346	1.50328	1.31825		0.671987						0.462936	-1.78484	3.10498	0.739334	3.03357	2.65991			0.462936	-1.78484	3.10498	0.739334	3.03357	2.65991		0.403765		1.54992	1.38598	0.382629
Q10MG9	10.1012	9.96268	9.94237	10.7022	10.2969	9.99958	3	3	6			1.41706	0.897792	1.02944	1.36074	0.396651	1.31248		1.06903						2.96161	1.87386	2.14281	2.85526	0.800429	2.64828			2.96161	1.87386	2.14281	2.85526	0.800429	2.64828		0.401006		-0.224772	0.370203	0.773673
Q10L32	10.1472	9.96138	7.42097	6.96613	11.0266	9.99901	3	3	6			1.46308	0.89649	-1.49195	-2.37531	1.12633	1.31192		0.155093						3.05778	1.87114	-3.10553	-4.98415	2.27289	2.64714			3.05778	1.87114	-3.10553	-4.98415	2.27289	2.64714		0.732428		-0.629172	0.234435	0.850018
Q7XT07	9.02092	7.27277	9.22279	7.49977	7.84881	9.99789	3	3	6			0.336801	-1.79212	0.309871	-1.84167	-2.05145	1.31079		-0.621297						0.703901	-3.74049	0.645004	-3.86441	-4.13977	2.64486			0.703901	-3.74049	0.645004	-3.86441	-4.13977	2.64486		0.611747		-0.989246	0.45613	0.728939
Q0J7J7	10.0112	10.0119	8.50645	7.89063	9.4452	9.99223	3	3	6			1.3271	0.947039	-0.406477	-1.45081	-0.455064	1.30514		0.211155						2.7736	1.97665	-0.846091	-3.04426	-0.918304	2.63345			2.7736	1.97665	-0.846091	-3.04426	-0.918304	2.63345		0.610756		-1.74442	1.21898	0.429586
Q6Z1C0	9.33624	10.3761	10.5719	9.56138	10.0351	9.9901	3	3	6			0.652115	1.31124	1.65902	0.219946	0.134809	1.30301		0.880023						1.3629	2.7368	3.45328	0.461517	0.27204	2.62916			1.3629	2.7368	3.45328	0.461517	0.27204	2.62916		0.793688		-1.39675	2.15392	0.224701
P49398	9.79766	12.242	8.79269	10.6326	12.8698	9.98826	3	3	6			1.11354	3.17707	-0.120231	1.29119	2.96954	1.30116		1.62205						2.32725	6.63113	-0.250263	2.70934	5.99244	2.62544			2.32725	6.63113	-0.250263	2.70934	5.99244	2.62544		0.467492		0.873031	0.468417	0.722757
Q5KQL9	10.5332	10.5745	10.4951	12.1139	12.7085	9.98712	3	3	6			1.84911	1.50961	1.58213	2.77244	2.80824	1.30003		1.97026						3.86457	3.15084	3.29324	5.81745	5.66693	2.62315			3.86457	3.15084	3.29324	5.81745	5.66693	2.62315		0.0841494		1.26629	1.73943	0.299488
Q9SNQ2	7.26379	8.67462	9.25812	10.4384	7.99271	9.98698	3	3	6			-1.42034	-0.390271	0.345195	1.09694	-1.90755	1.29989		-0.16269						-2.96845	-0.814569	0.718531	2.30173	-3.84938	2.62286			-2.96845	-0.814569	0.718531	2.30173	-3.84938	2.62286		0.409977		1.3799	0.760179	0.590423
Q67UX7	8.64677	9.22089	9.49025	6.6409	11.1877	9.98527	3	3	6			-0.0373486	0.155999	0.577326	-2.70054	1.28746	1.29818		0.0968453						-0.0780571	0.325599	1.20172	-5.6666	2.59805	2.61942			-0.0780571	0.325599	1.20172	-5.6666	2.59805	2.61942		0.0368138		-0.632797	0.250432	0.840645
Q0IZZ8	12.7614	10.8964	9.59565	8.97688	10.1525	9.98157	3	3	6			4.07728	1.83152	0.682726	-0.364558	0.252273	1.29447		1.29562						8.52136	3.82273	1.42111	-0.764959	0.509079	2.61194			8.52136	3.82273	1.42111	-0.764959	0.509079	2.61194		0.364625		-3.80305	2.51924	0.174434
Q6AUV1	8.79175	9.73334	8.0359	10.3534	10.3351	9.97613	3	3	6			0.107626	0.66845	-0.877025	1.01193	0.43479	1.28904		0.439135						0.224934	1.39518	-1.82555	2.12335	0.877393	2.60098			0.224934	1.39518	-1.82555	2.12335	0.877393	2.60098		0.459099		1.93572	2.78223	0.145367
Q6H3Y7	10.7752	9.41225	11.116	10.3918	9.08709	9.96881	3	3	6			2.09108	0.347365	2.2031	1.05034	-0.813173	1.28172		1.02674						4.37027	0.725016	4.58579	2.20396	-1.64096	2.5862			4.37027	0.725016	4.58579	2.20396	-1.64096	2.5862		0.925318		-2.17729	1.72479	0.302543
Q6ZLD3	9.94911	11.2896	8.60088	11.8623	10.237	9.96737	3	3	6			1.26499	2.22473	-0.312044	2.52085	0.336706	1.28028		1.21925						2.64378	4.64343	-0.649527	5.28955	0.679462	2.58329			2.64378	4.64343	-0.649527	5.28955	0.679462	2.58329		0.858003		0.63821	0.376596	0.770253
Q8LNW4	11.5801	7.79915	7.22294	9.76391	8.66924	9.96723	3	3	6			2.89599	-1.26574	-1.68998	0.422472	-1.23103	1.28013		0.0686424						6.05252	-2.64183	-3.51774	0.886482	-2.48417	2.583			6.05252	-2.64183	-3.51774	0.886482	-2.48417	2.583		0.384055		0.364121	0.120562	0.919829
Q8W4E1	6.75582	10.6257	7.98191	11.0957	8.74089	9.96694	3	3	6			-1.9283	1.56082	-0.931014	1.75429	-1.15937	1.27984		0.0960449						-4.03008	3.25773	-1.93792	3.68106	-2.33957	2.58242			-4.03008	3.25773	-1.93792	3.68106	-2.33957	2.58242		0.843992		2.21139	1.05572	0.481058
P53684	3.87431	10.4448	9.23064	10.1689	9.90748	9.96679	3	3	6			-4.80982	1.37992	0.317721	0.827486	0.00721157	1.2797		-0.166296						-10.0523	2.88015	0.661344	1.73633	0.0145527	2.58213			-10.0523	2.88015	0.661344	1.73633	0.0145527	2.58213		0.0691211		3.61462	1.2379	0.423989
F4JMJ3	11.0652	10.9982	11.0512	10.6363	12.5622	9.96239	3	3	6			2.38109	1.93335	2.13829	1.29482	2.66198	1.2753		1.94747						4.97639	4.03527	4.45089	2.71696	5.37178	2.57324			4.97639	4.03527	4.45089	2.71696	5.37178	2.57324		0.164409		-0.933519	1.39106	0.381284
Q7XHR2	9.00118	10.6752	11.0952	10.1807	10.3362	9.96093	3	3	6			0.31706	1.61028	2.18228	0.839218	0.435907	1.27383		1.10976						0.662643	3.36095	4.54245	1.76095	0.879646	2.5703			0.662643	3.36095	4.54245	1.76095	0.879646	2.5703		0.306215		-1.11839	1.24908	0.420717
Q69LD8	9.49396	7.88856	7.23132	10.4179	7.51215	9.95944	3	3	6			0.809832	-1.17633	-1.68161	1.07642	-2.38812	1.27234		-0.34791						1.69252	-2.45521	-3.5003	2.25866	-4.81914	2.56729			1.69252	-2.45521	-3.5003	2.25866	-4.81914	2.56729		0.603438		1.42327	0.626289	0.647841
Q7XRX3	8.58909	7.28503	7.6435	8.0013	10.4256	9.95757	3	3	6			-0.0950339	-1.77985	-1.26943	-1.34014	0.525371	1.27047		-0.448103						-0.198617	-3.71489	-2.64234	-2.81205	1.06018	2.56351			-0.198617	-3.71489	-2.64234	-2.81205	1.06018	2.56351		0.59376		2.45583	1.90067	0.267819
Q8GU89	9.00773	10.9537	8.58414	11.6537	12.3428	9.95699	3	3	6			0.323605	1.8888	-0.328788	2.31226	2.4425	1.26989		1.31805						0.676322	3.94228	-0.684379	4.85186	4.92889	2.56234			0.676322	3.94228	-0.684379	4.85186	4.92889	2.56234		0.484603		2.80296	2.73537	0.150166
Q75IS2	7.66356	9.37621	10.3557	9.40774	9.72865	9.95511	3	3	6			-1.02057	0.311325	1.44276	0.0662979	-0.171613	1.26802		0.316037						-2.13294	0.649794	3.00313	0.139114	-0.34631	2.55856			-2.13294	0.649794	3.00313	0.139114	-0.34631	2.55856		0.536186		0.277127	0.183045	0.880842
Q94E49	9.22168	9.1955	10.7408	10.1486	9.45107	9.95489	3	3	6			0.537561	0.130608	1.82787	0.807166	-0.449198	1.2678		0.686968						1.12348	0.272604	3.80475	1.69369	-0.906467	2.55812			1.12348	0.272604	3.80475	1.69369	-0.906467	2.55812		0.978		-0.618496	0.516317	0.699154
B9EYD3	7.82585	10.41	3.86235	10.9246	11.0268	9.95388	3	3	6			-0.858274	1.34514	-5.05057	1.58315	1.12654	1.26678		-0.0978725						-1.79376	2.80756	-10.5129	3.32196	2.27331	2.55607			-1.79376	2.80756	-10.5129	3.32196	2.27331	2.55607		0.0127803		5.88347	1.88601	0.270554
Q6YW62	11.3707	11.6404	11.4815	10.8066	10.8549	9.95219	3	3	6			2.68656	2.57554	2.56857	1.46519	0.954603	1.26509		1.91926						5.61482	5.37563	5.34654	3.07444	1.92636	2.55266			5.61482	5.37563	5.34654	3.07444	1.92636	2.55266		0.123095		-2.92784	9.9245	0.00102903
Q10FZ7	5.90487	9.9073	8.25894	10.5948	11.5674	9.95016	3	3	6			-2.77925	0.842409	-0.653981	1.25335	1.66712	1.26307		0.265453						-5.80853	1.75827	-1.36127	2.62994	3.3642	2.54857			-5.80853	1.75827	-1.36127	2.62994	3.3642	2.54857		0.0275299		4.65142	2.5856	0.166594
Q53Q32	10.3749	10.5483	10.5609	5.8419	10.2807	9.94641	3	3	6			1.69081	1.48345	1.64798	-3.49954	0.38039	1.25932		0.493735						3.53372	3.09625	3.43031	-7.34315	0.767614	2.541			3.53372	3.09625	3.43031	-7.34315	0.767614	2.541		0.00375801		-4.69827	1.93016	0.262401
A2X345	10.3606	9.61276	10.0988	10.268	12.0614	9.94623	3	3	6			1.6765	0.547871	1.1859	0.92652	2.16111	1.25914		1.29284						3.50383	1.14351	2.46847	1.94413	4.36104	2.54064			3.50383	1.14351	2.46847	1.94413	4.36104	2.54064		0.937883		0.57667	0.751055	0.594169
A0A0P0X0C0	8.28225	7.39111	8.90503	10.4201	9.24779	9.94395	3	3	6			-0.401869	-1.67377	-0.00789756	1.07863	-0.65248	1.25686		-0.0667556						-0.83989	-3.49348	-0.0164389	2.26331	-1.31668	2.53604			-0.83989	-3.49348	-0.0164389	2.26331	-1.31668	2.53604		0.833315		2.61082	2.44654	0.18345
Q06967	12.8724	11.0148	9.23573	11.6077	12.4739	9.94212	3	3	6			4.1883	1.9499	0.322804	2.26631	2.57362	1.25502		2.09266						8.75339	4.06981	0.671922	4.75544	5.19348	2.53234			8.75339	4.06981	0.671922	4.75544	5.19348	2.53234		0.220088		-0.337954	0.154688	0.898326
Q9FNI6	9.61758	10.8554	9.56727	10.7899	10.9101	9.94172	3	3	6			0.933454	1.79053	0.654348	1.4485	1.00985	1.25463		1.18189						1.95088	3.73717	1.36204	3.03942	2.03785	2.53154			1.95088	3.73717	1.36204	3.03942	2.03785	2.53154		0.281708		0.186243	0.284782	0.820866
Q7EY72	8.4849	11.1078	11.1018	11.2286	8.39004	9.941	3	3	6			-0.19922	2.04292	2.18886	1.8872	-1.51023	1.25391		0.943907						-0.416362	4.26395	4.55615	3.95995	-3.04759	2.53009			-0.416362	4.26395	4.55615	3.95995	-3.04759	2.53009		0.724417		-1.65376	0.81061	0.570141
C0LT23	9.6067	8.68233	9.02989	8.95295	10.1122	9.94077	3	3	6			0.922578	-0.38256	0.116971	-0.388492	0.211914	1.25367		0.289014						1.92815	-0.798474	0.243478	-0.815181	0.427635	2.52962			1.92815	-0.798474	0.243478	-0.815181	0.427635	2.52962		0.796824		0.256305	0.236909	0.848561
Q84MH1	6.90965	9.93188	9.35418	10.1823	12.1753	9.93936	3	3	6			-1.77447	0.866988	0.44126	0.840833	2.27507	1.25226		0.650324						-3.70857	1.80957	0.918492	1.76434	4.59101	2.52677			-3.70857	1.80957	0.918492	1.76434	4.59101	2.52677		0.391914		3.28754	2.64496	0.159877
B9G5N1	9.64526	10.6676	8.74574	11.5413	13.6913	9.93929	3	3	6			0.961139	1.60267	-0.167182	2.19985	3.79104	1.25219		1.60662						2.00874	3.34507	-0.347993	4.61599	7.6502	2.52662			2.00874	3.34507	-0.347993	4.61599	7.6502	2.52662		0.69007		3.26233	2.73166	0.150553
Q5SN53	9.69876	11.0352	10.5178	10.931	10.8972	9.93643	3	3	6			1.01463	1.97032	1.60484	1.58952	0.9969	1.24934		1.40426						2.12055	4.11244	3.34052	3.33532	2.01171	2.52087			2.12055	4.11244	3.34052	3.33532	2.01171	2.52087		0.612978		-0.568532	1.1202	0.460031
Q84ZC0	10.3075	8.38332	8.4616	9.65093	7.33163	9.93603	3	3	6			1.62342	-0.681572	-0.451321	0.309489	-2.56863	1.24894		-0.0866127						3.39288	-1.42257	-0.939435	0.649407	-5.18341	2.52006			3.39288	-1.42257	-0.939435	0.649407	-5.18341	2.52006		0.606821		-1.01494	0.447168	0.733481
Q84PB3	10.216	9.1103	10.8016	10.9679	11.5597	9.93142	3	3	6			1.5319	0.0454135	1.8887	1.62651	1.6594	1.24432		1.33271						3.2016	0.0947865	3.93138	3.41294	3.34861	2.51075			3.2016	0.0947865	3.93138	3.41294	3.34861	2.51075		0.115053		0.681511	0.727815	0.603818
Q5SNL7	11.4299	9.97714	10.4582	10.1581	11.4768	9.92825	3	3	6			2.74581	0.91225	1.54528	0.816668	1.57653	1.24116		1.47295						5.73863	1.90404	3.21653	1.71363	3.18139	2.50436			5.73863	1.90404	3.21653	1.71363	3.18139	2.50436		0.248827		-1.15327	1.35174	0.391819
Q9SYI0	9.34778	9.82472	9.74184	13.1447	11.4968	9.92561	3	3	6			0.663653	0.759833	0.828914	3.80327	1.59649	1.23852		1.48178						1.38701	1.58591	1.7254	7.98047	3.22166	2.49904			1.38701	1.58591	1.7254	7.98047	3.22166	2.49904		0.00650069		3.00095	2.16661	0.222733
O24174	6.34614	10.4356	7.98823	10.3247	10.6968	9.92391	3	3	6			-2.33798	1.37068	-0.924693	0.983306	0.796529	1.23681		0.187442						-4.88629	2.86086	-1.92477	2.06329	1.60737	2.49559			-4.88629	2.86086	-1.92477	2.06329	1.60737	2.49559		0.0254901		3.37215	1.87324	0.272959
Q8GU85	8.86725	11.3137	10.4032	9.10651	10.44	9.92255	3	3	6			0.183125	2.24885	1.4903	-0.234927	0.539774	1.23546		0.91043						0.382723	4.69376	3.10209	-0.492951	1.08925	2.49287			0.382723	4.69376	3.10209	-0.492951	1.08925	2.49287		0.639042		-1.69647	1.60602	0.328503
B9G4M9	10.7848	8.70974	6.44513	10.0865	10.1349	9.92104	3	3	6			2.10068	-0.355148	-2.46779	0.745097	0.234675	1.23394		0.248575						4.39033	-0.741262	-5.13676	1.56345	0.473566	2.4898			4.39033	-0.741262	-5.13676	1.56345	0.473566	2.4898		0.085753		2.00484	0.955864	0.515533
A1A698	11.7302	10.5046	10.6717	10.9645	10.7989	9.91988	3	3	6			3.04605	1.43973	1.75879	1.62305	0.898612	1.23278		1.6665						6.36613	3.00499	3.66097	3.40567	1.81337	2.48746			6.36613	3.00499	3.66097	3.40567	1.81337	2.48746		0.335072		-1.77519	2.39239	0.190467
Q7XI75	9.54177	11.4192	7.83561	6.54113	9.02076	9.9197	3	3	6			0.857651	2.35428	-1.07732	-2.80031	-0.879507	1.2326		-0.0520991						1.79246	4.91383	-2.24245	-5.87594	-1.77482	2.4871			1.79246	4.91383	-2.24245	-5.87594	-1.77482	2.4871		0.848002		-3.20916	1.43385	0.370142
A0A0P0WFC8	3.90939	10.6162	9.64566	11.2138	12.0272	9.91837	3	3	6			-4.77473	1.55129	0.732735	1.87234	2.12695	1.23128		0.456643						-9.97901	3.23784	1.5252	3.92876	4.29212	2.48442			-9.97901	3.23784	1.5252	3.92876	4.29212	2.48442		0.0347811		5.30709	1.60478	0.328785
Q8GU82	10.3602	10.152	9.55612	12.1146	8.5157	9.91537	3	3	6			1.67607	1.08714	0.643199	2.77315	-1.38457	1.22828		1.00388						3.50291	2.26907	1.33883	5.81896	-2.79401	2.47837			3.50291	2.26907	1.33883	5.81896	-2.79401	2.47837		0.117642		-0.535833	0.241494	0.845869
Q5W6F9	10.5944	12.3201	11.7845	9.49791	10.9008	9.91422	3	3	6			1.91029	3.25521	2.87155	0.156474	1.00053	1.22713		1.73686						3.99244	6.79423	5.97719	0.328333	2.01903	2.47605			3.99244	6.79423	5.97719	0.328333	2.01903	2.47605		0.762783		-3.98015	5.664	0.0197227
Q10CQ1	8.09887	12.4093	9.75218	8.55792	10.5487	9.9138	3	3	6			-0.585249	3.34442	0.839256	-0.783514	0.648461	1.22671		0.781681						-1.22315	6.98044	1.74693	-1.64406	1.30857	2.47521			-1.22315	6.98044	1.74693	-1.64406	1.30857	2.47521		0.414338		-1.78817	0.880899	0.543029
Q6Z4G8	10.5639	10.5573	10.0128	11.6033	10.7669	9.91109	3	3	6			1.87974	1.49239	1.09984	2.26191	0.866678	1.224		1.47076						3.92859	3.11489	2.28934	4.74621	1.74893	2.46974			3.92859	3.11489	2.28934	4.74621	1.74893	2.46974		0.430719		-0.122646	0.13596	0.910064
A2YFR6	10.4123	10.8273	9.68522	13.4173	11.2592	9.90859	3	3	6			1.72813	1.76246	0.772298	4.07589	1.35895	1.22149		1.81987						3.61172	3.67858	1.60756	8.55251	2.74231	2.46468			3.61172	3.67858	1.60756	8.55251	2.74231	2.46468		0.209836		1.62055	1.05017	0.48291
Q7X7S8	9.76203	9.77028	8.88737	11.1579	8.72795	9.90657	3	3	6			1.07791	0.705397	-0.0255505	1.81641	-1.17231	1.21948		0.603557						2.25279	1.4723	-0.0531839	3.81142	-2.36568	2.46062			2.25279	1.4723	-0.0531839	3.81142	-2.36568	2.46062		0.230784		0.0781516	0.0430422	0.970606
A2YGL9	8.23487	7.82426	9.188	10.2954	8.28924	9.90391	3	3	6			-0.449258	-1.24063	0.275072	0.953987	-1.61103	1.21682		-0.142507						-0.938932	-2.58942	0.572568	2.00177	-3.25101	2.45525			-0.938932	-2.58942	0.572568	2.00177	-3.25101	2.45525		0.398244		1.38727	0.902433	0.534984
Q53NL5	8.82244	6.57811	6.17826	8.36964	7.78378	9.9028	3	3	6			0.13832	-2.48678	-2.73467	-0.971796	-2.11648	1.2157		-1.15928						0.289084	-5.19037	-5.69227	-2.03914	-4.27099	2.453			0.289084	-5.19037	-5.69227	-2.03914	-4.27099	2.453		0.968337		2.24548	1.11876	0.460489
Q8S2A7	10.7754	9.73388	12.2229	8.80203	11.8199	9.89738	3	3	6			2.09132	0.668993	3.31002	-0.539406	1.91959	1.21028		1.44347						4.37078	1.39631	6.88988	-1.13185	3.87368	2.44206			4.37078	1.39631	6.88988	-1.13185	3.87368	2.44206		0.935543		-2.49103	1.6611	0.316198
Q5QLS7	9.8098	9.94625	12.1636	10.4792	9.9436	9.89432	3	3	6			1.12568	0.881361	3.25066	1.13774	0.043334	1.20722		1.27433						2.35262	1.83957	6.76632	2.38734	0.0874467	2.43589			2.35262	1.83957	6.76632	2.38734	0.0874467	2.43589		0.394245		-2.01595	1.67879	0.312344
Q0E0Q3	9.79941	11.0152	7.63125	11.5828	9.19476	9.88896	3	3	6			1.11529	1.95032	-1.28167	2.24132	-0.705508	1.20186		0.753601						2.33091	4.07068	-2.66783	4.703	-1.42369	2.42507			2.33091	4.07068	-2.66783	4.703	-1.42369	2.42507		0.878715		0.656872	0.28705	0.819576
Q6EU49	8.74876	11.1269	6.75409	11.8671	10.4899	9.8882	3	3	6			0.0646398	2.06201	-2.15884	2.52565	0.589683	1.2011		0.714041						0.135095	4.3038	-4.49367	5.29962	1.18996	2.42354			0.135095	4.3038	-4.49367	5.29962	1.18996	2.42354		0.373495		2.98929	1.52076	0.348503
Q6Z4K6	8.62917	10.3743	6.90629	10.6462	10.6013	9.88774	3	3	6			-0.0549488	1.30939	-2.00663	1.30476	0.701042	1.20064		0.409043						-0.114841	2.73295	-4.17685	2.73781	1.41468	2.42262			-0.114841	2.73295	-4.17685	2.73781	1.41468	2.42262		0.0762006		2.71128	1.96916	0.255401
Q9FXT4	6.77729	6.86183	9.16684	9.18982	8.44108	9.88156	3	3	6			-1.90684	-2.20306	0.253917	-0.151613	-1.45919	1.19446		-0.712052						-3.98521	-4.59819	0.528535	-0.318132	-2.94459	2.41014			-3.98521	-4.59819	0.528535	-0.318132	-2.94459	2.41014		0.95538		2.40076	1.54143	0.343546
Q75LH6	8.64649	10.3008	10.8019	11.0778	11.6604	9.88075	3	3	6			-0.0376365	1.23592	1.88895	1.73638	1.76009	1.19365		1.29623						-0.0786589	2.5796	3.93188	3.64348	3.5518	2.40851			-0.0786589	2.5796	3.93188	3.64348	3.5518	2.40851		0.204217		1.05699	1.17428	0.443106
Q0JF58	9.71667	9.81911	9.1756	9.0805	12.6687	9.87903	3	3	6			1.03254	0.754222	0.262676	-0.260939	2.76846	1.19194		0.958151						2.15797	1.5742	0.546766	-0.547534	5.58667	2.40505			2.15797	1.5742	0.546766	-0.547534	5.58667	2.40505		0.132065		1.05508	0.747423	0.595667
Q6ZJM9	9.7186	9.58534	10.5591	7.57871	10.5308	9.87902	3	3	6			1.03448	0.520451	1.64617	-1.76272	0.630531	1.19192		0.543471						2.16202	1.08628	3.42653	-3.69876	1.27239	2.40502			2.16202	1.08628	3.42653	-3.69876	1.27239	2.40502		0.230344		-2.23206	1.61972	0.325399
Q76I22	10.452	8.94207	11.1394	11.3578	11.2272	9.87624	3	3	6			1.76791	-0.122813	2.22644	2.01639	1.32693	1.18915		1.40067						3.69487	-0.256333	4.63437	4.23103	2.6777	2.39942			3.69487	-0.256333	4.63437	4.23103	2.6777	2.39942		0.252713		0.411746	0.30406	0.80997
Q5N870	11.1498	10.3116	10.1361	13.2238	14.5591	9.8744	3	3	6			2.46569	1.24675	1.22317	3.88237	4.65881	1.1873		2.44402						5.15319	2.6022	2.54606	8.14645	9.40133	2.3957			5.15319	2.6022	2.54606	8.14645	9.40133	2.3957		0.274297		3.21401	2.06799	0.238491
Q10PI6	8.47832	7.15725	10.7495	7.14558	12.9594	9.87334	3	3	6			-0.205799	-1.90764	1.83653	-2.19586	3.05916	1.18624		0.295438						-0.430111	-3.98161	3.82277	-4.60762	6.17328	2.39356			-0.430111	-3.98161	3.82277	-4.60762	6.17328	2.39356		0.67573		1.51605	0.48199	0.715989
Q10NB9	8.96177	10.0873	9.46693	9.8254	7.29011	9.87321	3	3	6			0.277645	1.02244	0.554009	0.483967	-2.61015	1.18612		0.152338						0.580267	2.13403	1.15318	1.01552	-5.26721	2.39331			0.580267	2.13403	1.15318	1.01552	-5.26721	2.39331		0.0714055		-1.90862	1.08576	0.471143
P52712	10.3801	7.98914	8.75952	8.03705	11.3487	9.8711	3	3	6			1.69601	-1.07575	-0.153401	-1.30438	1.44841	1.18401		0.29915						3.5446	-2.24529	-0.319308	-2.73702	2.92284	2.38905			3.5446	-2.24529	-0.319308	-2.73702	2.92284	2.38905		0.941914		0.531623	0.250194	0.840783
Q8LHH9	10.9471	11.4482	11.4299	10.9626	9.23201	9.86956	3	3	6			2.263	2.38333	2.51695	1.62117	-0.668252	1.18247		1.54978						4.72959	4.97446	5.23909	3.40173	-1.34851	2.38594			4.72959	4.97446	5.23909	3.40173	-1.34851	2.38594		0.0205412		-3.50133	2.89103	0.134808
P29044	9.54759	10.0165	10.6304	11.2727	12.296	9.86947	3	3	6			0.863465	0.951643	1.71743	1.93131	2.39576	1.18238		1.507						1.80461	1.98626	3.57488	4.0525	4.83457	2.38575			1.80461	1.98626	3.57488	4.0525	4.83457	2.38575		0.754869		1.30236	2.13407	0.227815
Q9XIC5	9.26278	9.7536	10.4099	9.22125	9.38517	9.86643	3	3	6			0.578653	0.688714	1.497	-0.120188	-0.515093	1.17933		0.551403						1.20936	1.43748	3.11603	-0.252194	-1.03944	2.37962			1.20936	1.43748	3.11603	-0.252194	-1.03944	2.37962		0.505415		-1.5583	1.92964	0.262495
Q0D6V7	7.88539	9.78953	6.64775	10.3852	10.2258	9.86617	3	3	6			-0.798732	0.724647	-2.26518	1.04378	0.325545	1.17907		0.0348554						-1.66932	1.51247	-4.71501	2.19018	0.656939	2.37909			-1.66932	1.51247	-4.71501	2.19018	0.656939	2.37909		0.168486		3.36602	2.75956	0.147669
Q7XPL3	6.64098	10.4624	10.2797	8.88682	10.029	9.86431	3	3	6			-2.04314	1.39751	1.3668	-0.454613	0.128746	1.17722		0.262087						-4.27009	2.91687	2.84503	-0.953923	0.259805	2.37534			-4.27009	2.91687	2.84503	-0.953923	0.259805	2.37534		0.285507		0.0631364	0.0267778	0.98161
Q6AVM3	8.17438	10.7882	8.58579	9.9046	12.7005	9.86338	3	3	6			-0.509747	1.72334	-0.327135	0.563167	2.80024	1.17629		0.904359						-1.06535	3.59694	-0.680938	1.1817	5.65079	2.37347			-1.06535	3.59694	-0.680938	1.1817	5.65079	2.37347		0.888673		2.45177	1.79389	0.288394
Q8RWY3	10.237	11.7344	10.6115	10.197	10.061	9.86217	3	3	6			1.55285	2.66948	1.69856	0.855534	0.160701	1.17508		1.35203						3.24539	5.57171	3.53559	1.79518	0.32429	2.37103			3.24539	5.57171	3.53559	1.79518	0.32429	2.37103		0.818847		-2.62073	4.28549	0.051279
Q0JEQ2	5.21051	4.74911	5.09913	7.50247	8.15208	9.85953	3	3	6			-3.47362	-4.31578	-3.8138	-1.83896	-1.74818	1.17244		-2.33632						-7.25973	-9.00785	-7.9385	-3.85873	-3.52778	2.36571			-7.25973	-9.00785	-7.9385	-3.85873	-3.52778	2.36571		0.119115		6.39509	4.7411	0.0373927
P0DKK9	8.90265	9.89647	9.62978	10.585	10.9779	9.85913	3	3	6			0.218523	0.831582	0.716852	1.24353	1.07759	1.17204		0.876684						0.456705	1.73567	1.49214	2.60931	2.17454	2.36489			0.456705	1.73567	1.49214	2.60931	2.17454	2.36489		0.186757		1.15474	4.36287	0.0486009
Q6K687	9.6012	9.64593	8.18582	8.88215	12.01	9.85814	3	3	6			0.917072	0.581041	-0.727106	-0.459283	2.10974	1.17104		0.598751						1.91665	1.21274	-1.51349	-0.963723	4.25738	2.36289			1.91665	1.21274	-1.51349	-0.963723	4.25738	2.36289		0.63931		1.34688	0.980141	0.50693
A3AZ89	10.3061	7.7046	7.86239	7.16792	8.70307	9.85538	3	3	6			1.62194	-1.36029	-1.05053	-2.17352	-1.19719	1.16829		-0.498551						3.38979	-2.83918	-2.18671	-4.56073	-2.41589	2.35733			3.38979	-2.83918	-2.18671	-4.56073	-2.41589	2.35733		0.966198		-0.994399	0.426207	0.744216
Q8RV06	8.80941	9.12779	8.32373	9.6085	10.6139	9.85521	3	3	6			0.125291	0.0629009	-0.589193	0.267058	0.713617	1.16812		0.291298						0.261854	0.131286	-1.22642	0.560373	1.44005	2.35698			0.261854	0.131286	-1.22642	0.560373	1.44005	2.35698		0.913987		1.73023	3.84004	0.0698287
Q5JLD8	6.67342	7.02735	8.69286	9.41777	9.95656	9.85342	3	3	6			-2.01071	-2.03753	-0.220064	0.0763309	0.0562999	1.16632		-0.494892						-4.2023	-4.25272	-0.458068	0.160167	0.113611	2.35337			-4.2023	-4.25272	-0.458068	0.160167	0.113611	2.35337		0.513924		3.84674	4.11654	0.05765
A2Z9Q7	7.0197	7.76845	7.55559	10.177	8.80281	9.85119	3	3	6			-1.66442	-1.29644	-1.35734	0.835609	-1.09746	1.16409		-0.569326						-3.47858	-2.70591	-2.82533	1.75337	-2.21463	2.34886			-3.47858	-2.70591	-2.82533	1.75337	-2.21463	2.34886		0.0546851		3.63247	3.90666	0.0666775
Q8LQJ9	10.6655	10.5994	10.3465	10.0654	11.457	9.84976	3	3	6			1.98139	1.53447	1.43359	0.723979	1.55671	1.16267		1.3988						4.14103	3.20272	2.98405	1.51914	3.14138	2.34599			4.14103	3.20272	2.98405	1.51914	3.14138	2.34599		0.729494		-1.1071	2.91431	0.13265
Q655R6	9.53502	11.7696	10.5132	10.4643	10.2281	9.84773	3	3	6			0.850899	2.7047	1.60031	1.1229	0.327832	1.16064		1.29455						1.77835	5.64522	3.33108	2.35621	0.661555	2.34189			1.77835	5.64522	3.33108	2.35621	0.661555	2.34189		0.400893		-1.79833	2.14821	0.225592
Q7Y0V7	8.35036	11.5366	7.23093	9.70122	8.42744	9.84367	3	3	6			-0.333759	2.47175	-1.68199	0.359783	-1.47283	1.15658		0.0832553						-0.697543	5.159	-3.5011	0.754939	-2.97212	2.3337			-0.697543	5.159	-3.5011	0.754939	-2.97212	2.3337		0.550864		-0.281282	0.105099	0.929741
Q53NI2	9.11372	8.96965	10.1213	11.911	12.2471	9.84208	3	3	6			0.429593	-0.0952416	1.20835	2.56958	2.3468	1.15499		1.26901						0.897833	-0.198787	2.51521	5.3918	4.73577	2.33049			0.897833	-0.198787	2.51521	5.3918	4.73577	2.33049		0.835532		3.08127	3.94559	0.064902
Q75GT3	10.0515	12.4699	10.5206	11.0875	12.5791	9.84131	3	3	6			1.36736	3.40501	1.6077	1.74603	2.67879	1.15422		1.99318						2.85773	7.10689	3.34645	3.66372	5.40571	2.32894			2.85773	7.10689	3.34645	3.66372	5.40571	2.32894		0.611445		-0.637566	0.489056	0.712491
Q5K5B6	9.23376	9.40909	9.1036	10.3194	11.5896	9.83794	3	3	6			0.54964	0.344207	0.190679	0.978009	1.68934	1.15085		0.817121						1.14873	0.718424	0.396903	2.05218	3.40903	2.32214			1.14873	0.718424	0.396903	2.05218	3.40903	2.32214		0.432396		1.83976	5.86697	0.0171343
Q6K3D8	11.3148	10.043	9.95516	9.93948	11.6565	9.8364	3	3	6			2.63063	0.97814	1.04223	0.598039	1.7562	1.1493		1.35909						5.49792	2.04156	2.16943	1.25488	3.54396	2.31902			5.49792	2.04156	2.16943	1.25488	3.54396	2.31902		0.50933		-0.863682	0.873346	0.54588
Q6T5K2	12.7075	13.0196	9.91219	7.53691	11.9774	9.83638	3	3	6			4.02334	3.95472	0.999262	-1.80453	2.07712	1.14929		1.7332						8.40863	8.25425	2.07999	-3.78648	4.19157	2.31899			8.40863	8.25425	2.07999	-3.78648	4.19157	2.31899		0.856347		-5.3396	2.56506	0.168981
Q9AUK4	11.0149	10.2264	10.0814	7.38871	11.6619	9.83537	3	3	6			2.3308	1.16153	1.16843	-1.95273	1.76165	1.14828		0.936325						4.87129	2.42432	2.43211	-4.09745	3.55495	2.31695			4.87129	2.42432	2.43211	-4.09745	3.55495	2.31695		0.210956		-2.65109	1.51453	0.35001
A2Y6Z7	8.80716	10.2287	9.57633	10.1971	11.8143	9.8346	3	3	6			0.123038	1.16381	0.66341	0.855657	1.91408	1.1475		0.977916						0.257146	2.42909	1.3809	1.79544	3.86255	2.31539			0.257146	2.42909	1.3809	1.79544	3.86255	2.31539		0.989874		1.30208	2.22372	0.214089
Q8LIB3	10.372	12.8324	6.23837	11.1389	9.82161	9.83365	3	3	6			1.68787	3.76749	-2.67456	1.79747	-0.0786504	1.14656		0.94103						3.52759	7.86346	-5.56715	3.77168	-0.158714	2.31348			3.52759	7.86346	-5.56715	3.77168	-0.158714	2.31348		0.155023		0.0341804	0.00900398	0.993778
Q688Y7	11.4522	10.7339	10.6821	11.7787	10.9984	9.83056	3	3	6			2.76812	1.66898	1.76919	2.43726	1.09811	1.14347		1.81419						5.78526	3.48347	3.68261	5.11414	2.21596	2.30725			5.78526	3.48347	3.68261	5.11414	2.21596	2.30725		0.749385		-1.10466	1.28487	0.410409
Q852M0	8.86199	10.4298	7.76361	9.38922	7.81417	9.82963	3	3	6			0.177863	1.36494	-1.14931	0.0477854	-2.0861	1.14253		-0.0837153						0.371727	2.84888	-2.39232	0.100269	-4.20968	2.30536			0.371727	2.84888	-2.39232	0.100269	-4.20968	2.30536		0.770024		-0.877447	0.439714	0.737281
Q69SG5	9.96	10.2283	10.9708	10.0182	11.7433	9.82944	3	3	6			1.27588	1.16345	2.0579	0.676763	1.84301	1.14234		1.35989						2.66654	2.42834	4.28357	1.42006	3.71914	2.30498			2.66654	2.42834	4.28357	1.42006	3.71914	2.30498		0.862129		-0.644754	0.977568	0.507835
Q0DS59	8.51873	5.47942	8.63739	6.99141	6.46821	9.82687	3	3	6			-0.165391	-3.58546	-0.275538	-2.35003	-3.43206	1.13977		-1.44478						-0.345662	-7.48353	-0.573538	-4.93111	-6.92578	2.29979			-0.345662	-7.48353	-0.573538	-4.93111	-6.92578	2.29979		0.822482		-0.384789	0.118463	0.921169
Q5NBJ3	8.7808	9.12278	8.53625	8.96573	9.18013	9.82625	3	3	6			0.0966789	0.0578891	-0.376676	-0.375711	-0.720132	1.13915		-0.0297997						0.202055	0.120825	-0.78406	-0.788361	-1.4532	2.29854			0.202055	0.120825	-0.78406	-0.788361	-1.4532	2.29854		0.139128		0.172718	0.164304	0.892359
Q10S83	11.6868	9.44624	10.7269	11.5653	11.0515	9.82526	3	3	6			3.00264	0.381348	1.81398	2.2239	1.15122	1.13817		1.61854						6.2754	0.795946	3.77583	4.66646	2.32312	2.29655			6.2754	0.795946	3.77583	4.66646	2.32312	2.29655		0.394893		-0.520351	0.35264	0.78315
Q6ET49	10.3378	9.52036	11.4458	11.3008	12.0715	9.82515	3	3	6			1.65372	0.455476	2.53287	1.95937	2.17126	1.13806		1.65179						3.45621	0.950664	5.27222	4.11139	4.38154	2.29633			3.45621	0.950664	5.27222	4.11139	4.38154	2.29633		0.429035		0.370054	0.310409	0.806413
O10378	12.488	13.1866	9.19604	11.6285	11.536	9.82453	3	3	6			3.80389	4.12168	0.283113	2.28705	1.63569	1.13744		2.21148						7.94999	8.60271	0.589306	4.79897	3.30077	2.29507			7.94999	8.60271	0.589306	4.79897	3.30077	2.29507		0.148435		-2.24906	1.16148	0.447055
A4PBP7	9.9976	10.2059	10.2982	8.82833	10.0575	9.8227	3	3	6			1.31348	1.14103	1.38525	-0.51311	0.157185	1.1356		0.769907						2.74512	2.38154	2.88343	-1.07667	0.317195	2.29138			2.74512	2.38154	2.88343	-1.07667	0.317195	2.29138		0.0458537		-2.1594	2.69129	0.154825
Q6YVX9	10.317	12.304	11.4041	10.2758	12.6274	9.82074	3	3	6			1.63284	3.23912	2.49121	0.934338	2.72715	1.13364		2.02638						3.41257	6.76066	5.1855	1.96054	5.50331	2.28742			3.41257	6.76066	5.1855	1.96054	5.50331	2.28742		0.845211		-1.86915	1.85038	0.277319
Q10Q26	5.562	12.3839	8.95582	11.8894	10.6911	9.82048	3	3	6			-3.12213	3.31898	0.0429008	2.54799	0.790868	1.13339		0.785334						-6.52512	6.92733	0.0892989	5.3465	1.59595	2.28691			-6.52512	6.92733	0.0892989	5.3465	1.59595	2.28691		0.161859		2.91261	0.966046	0.511907
Q7XWS7	11.7339	8.07307	10.5773	10.032	10.1527	9.82032	3	3	6			3.04974	-0.991817	1.66441	0.690609	0.2524	1.13323		0.966428						6.37384	-2.07011	3.46451	1.44912	0.509335	2.28659			6.37384	-2.07011	3.46451	1.44912	0.509335	2.28659		0.0823898		-1.1744	0.585218	0.666549
Q6K641	10.5967	9.22542	8.97645	10.2265	10.3969	9.8197	3	3	6			1.91253	0.160537	0.0635261	0.885095	0.496661	1.13261		0.77516						3.99712	0.335071	0.132231	1.85721	1.00225	2.28533			3.99712	0.335071	0.132231	1.85721	1.00225	2.28533		0.165466		0.226789	0.199112	0.871087
Q2R4J4	8.30889	9.12223	8.11749	11.8702	13.7651	9.81895	3	3	6			-0.375238	0.0573456	-0.795436	2.52881	3.86481	1.13186		1.06869						-0.784233	0.119691	-1.65572	5.30626	7.79907	2.28382			-0.784233	0.119691	-1.65572	5.30626	7.79907	2.28382		0.187288		5.90313	5.3598	0.0243522
Q9FRG8	8.94459	9.94027	5.87809	11.3998	12.7785	9.81865	3	3	6			0.260472	0.875382	-3.03484	2.05832	2.87824	1.13155		0.694856						0.544376	1.82709	-6.31707	4.31902	5.8082	2.2832			0.544376	1.82709	-6.31707	4.31902	5.8082	2.2832		0.28075		5.45201	3.10537	0.116196
B5UBC1	11.7586	11.3512	9.79495	12.7084	13.0417	9.81618	3	3	6			3.07447	2.28633	0.882028	3.36694	3.14141	1.12909		2.31338						6.42553	4.772	1.83596	7.06491	6.33927	2.27823			6.42553	4.772	1.83596	7.06491	6.33927	2.27823		0.89617		0.882971	0.551335	0.682388
Q6YTW6	9.27121	4.96823	6.09071	4.61777	10.0606	9.81336	3	3	6			0.587083	-4.09666	-2.82222	-4.72367	0.160296	1.12627		-1.62815						1.22698	-8.5505	-5.87451	-9.91177	0.323472	2.27255			1.22698	-8.5505	-5.87451	-9.91177	0.323472	2.27255		0.746896		1.96076	0.509801	0.702319
Q5W6L9	11.2051	10.6862	13.1008	11.3243	12.5017	9.81206	3	3	6			2.52094	1.62135	4.1879	1.98291	2.6014	1.12497		2.33991						5.26866	3.38406	8.71721	4.16078	5.24954	2.26992			5.26866	3.38406	8.71721	4.16078	5.24954	2.26992		0.474184		-1.89656	1.52058	0.348545
Q7XUF4	9.65675	10.6509	11.8814	9.23998	10.4379	9.81152	3	3	6			0.972623	1.58599	2.9685	-0.101457	0.537591	1.12443		1.18128						2.03275	3.31025	6.17899	-0.212889	1.08484	2.26882			2.03275	3.31025	6.17899	-0.212889	1.08484	2.26882		0.509387		-2.79374	3.05248	0.120535
A2X5P7	8.58241	10.5791	10.5296	11.4601	10.7457	9.81129	3	3	6			-0.101718	1.51424	1.6167	2.11871	0.845409	1.1242		1.18626						-0.212586	3.1605	3.3652	4.44573	1.70601	2.26837			-0.212586	3.1605	3.3652	4.44573	1.70601	2.26837		0.683093		0.702331	0.623826	0.648948
Q5ZCI1	8.11348	10.4861	10.2488	10.3923	10.3427	9.80972	3	3	6			-0.570642	1.42124	1.33583	1.05088	0.442476	1.12263		0.800403						-1.19262	2.9664	2.78057	2.20508	0.892903	2.26519			-1.19262	2.9664	2.78057	2.20508	0.892903	2.26519		0.196511		0.269609	0.218462	0.859481
Q0WVW7	7.2971	9.40982	11.4406	9.78162	11.2902	9.80623	3	3	6			-1.38702	0.344928	2.52763	0.440185	1.38998	1.11913		0.73914						-2.89883	0.71993	5.26132	0.923648	2.80494	2.25815			-2.89883	0.71993	5.26132	0.923648	2.80494	2.25815		0.106095		0.968103	0.49365	0.710226
Q850K7	9.15798	9.8216	7.8635	9.58242	7.2211	9.80621	3	3	6			0.473855	0.756712	-1.04942	0.240987	-2.67916	1.11912		-0.189651						0.990339	1.5794	-2.18439	0.505668	-5.40646	2.25811			0.990339	1.5794	-2.18439	0.505668	-5.40646	2.25811		0.405266		-1.00934	0.479373	0.717289
Q0JNK5	8.71716	10.5467	10.2946	14.0466	10.0433	9.80526	3	3	6			0.033039	1.48181	1.3817	4.70518	0.143036	1.11817		1.47715						0.0690503	3.09283	2.87603	9.87296	0.288641	2.25619			0.0690503	3.09283	2.87603	9.87296	0.288641	2.25619		0.199858		2.12663	0.921538	0.527946
Q9LSU3	9.4325	9.40173	8.05447	11.327	8.51751	9.80324	3	3	6			0.748377	0.336846	-0.858455	1.98555	-1.38275	1.11615		0.324286						1.56408	0.70306	-1.78689	4.16633	-2.79035	2.25212			1.56408	0.70306	-1.78689	4.16633	-2.79035	2.25212		0.379906		1.04928	0.572182	0.672599
Q7XDD0	6.78673	8.12102	9.87917	11.1422	9.84434	9.80274	3	3	6			-1.8974	-0.943872	0.966246	1.8008	-0.0559202	1.11565		0.164251						-3.96549	-1.97004	2.01126	3.77865	-0.112845	2.25111			-3.96549	-1.97004	2.01126	3.77865	-0.112845	2.25111		0.58676		3.28039	2.38394	0.191586
O80839	6.08326	7.31388	8.1469	9.6256	9.60505	9.8024	3	3	6			-2.60087	-1.75101	-0.766024	0.284162	-0.295212	1.11531		-0.66894						-5.43571	-3.65468	-1.59449	0.596263	-0.595727	2.25043			-5.43571	-3.65468	-1.59449	0.596263	-0.595727	2.25043		0.712055		4.31195	4.81188	0.0356025
Q6F353	9.31728	11.6382	11.7965	12.9054	14.2722	9.80129	3	3	6			0.633154	2.57328	2.88356	3.56393	4.37193	1.11419		2.52334						1.32327	5.37091	6.0022	7.47827	8.82241	2.24818			1.32327	5.37091	6.0022	7.47827	8.82241	2.24818		0.696488		1.95083	1.07055	0.476136
Q6Z8P4	11.3321	10.9141	9.89654	9.72069	10.5309	9.79761	3	3	6			2.64797	1.8492	0.983621	0.379252	0.630629	1.11052		1.26686						5.53415	3.85963	2.04743	0.795791	1.27259	2.24076			5.53415	3.85963	2.04743	0.795791	1.27259	2.24076		0.302599		-2.37735	3.39233	0.0952373
Q7Y1C8	8.66299	10.2488	8.99565	8.75596	10.6682	9.79695	3	3	6			-0.0211345	1.18387	0.0827306	-0.585481	0.767911	1.10985		0.422958						-0.0441703	2.47096	0.172206	-1.22853	1.54962	2.23942			-0.0441703	2.47096	0.172206	-1.22853	1.54962	2.23942		0.731359		-0.0128273	0.0104672	0.992771
Q84PW3	9.03348	9.8862	9.73471	10.7302	10.6677	9.79693	3	3	6			0.349355	0.821312	0.821786	1.38878	0.767467	1.10984		0.876423						0.730138	1.71423	1.71057	2.9141	1.54872	2.23939			0.730138	1.71423	1.71057	2.9141	1.54872	2.23939		0.816595		0.849092	2.5324	0.17285
Q5Z5C9	13.3788	10.3613	10.3751	7.43896	9.71989	9.79692	3	3	6			4.69471	1.2964	1.46222	-1.90248	-0.18038	1.10982		1.08005						9.81177	2.70583	3.04365	-3.99201	-0.364001	2.23936			9.81177	2.70583	3.04365	-3.99201	-0.364001	2.23936		0.757412		-5.89263	3.11767	0.115209
Q0DI31	7.88209	8.60955	7.78496	9.10423	12.4023	9.79674	3	3	6			-0.80203	-0.455339	-1.12796	-0.237205	2.50205	1.10964		0.16486						-1.67621	-0.950378	-2.34788	-0.497733	5.04906	2.239			-1.67621	-0.950378	-2.34788	-0.497733	5.04906	2.239		0.119426		3.9216	3.70991	0.0764196
Q0JD42	10.6694	11.1167	11.4928	11.2885	11.8149	9.79583	3	3	6			1.98529	2.05185	2.57988	1.94708	1.9146	1.10873		1.93124						4.14919	4.28259	5.37008	4.0856	3.8636	2.23716			4.14919	4.28259	5.37008	4.0856	3.8636	2.23716		0.611431		-1.20516	2.64463	0.159914
Q5JK20	9.94385	8.34279	10.6324	9.43429	11.0345	9.79237	3	3	6			1.25972	-0.722101	1.71944	0.0928574	1.13419	1.10527		0.764897						2.63278	-1.50716	3.57904	0.194845	2.28876	2.23018			2.63278	-1.50716	3.57904	0.194845	2.28876	2.23018		0.325377		0.00304162	0.00192956	0.998663
Q8W0F1	9.97757	9.04232	8.53714	10.1191	10.133	9.79159	3	3	6			1.29344	-0.0225711	-0.375783	0.777634	0.232749	1.10449		0.501661						2.70325	-0.0471101	-0.7822	1.63172	0.469679	2.2286			2.70325	-0.0471101	-0.7822	1.63172	0.469679	2.2286		0.383213		0.81869	0.927102	0.525914
Q10RP4	10.3554	16.2709	11.8731	11.1961	12.4237	9.78584	3	3	6			1.67123	7.20601	2.96021	1.85467	2.52343	1.09875		2.88572						3.4928	15.0403	6.16175	3.8917	5.0922	2.21702			3.4928	15.0403	6.16175	3.8917	5.0922	2.21702		0.107954		-4.49798	1.84516	0.278325
Q6Z4G3	8.69345	10.2832	8.24246	9.29103	10.7966	9.78269	3	3	6			0.00932885	1.21832	-0.670464	-0.0504047	0.896342	1.09559		0.416452						0.0194969	2.54286	-1.39558	-0.105765	1.80879	2.21065			0.0194969	2.54286	-1.39558	-0.105765	1.80879	2.21065		0.555893		0.915634	0.898607	0.536404
Q652K4	9.78846	6.46787	5.28211	8.38759	11.0158	9.78167	3	3	6			1.10433	-2.59702	-3.63082	-0.953851	1.1155	1.09458		-0.644546						2.30802	-5.42047	-7.55762	-2.00148	2.25104	2.2086			2.30802	-5.42047	-7.55762	-2.00148	2.25104	2.2086		0.362752		4.37608	1.96067	0.256909
Q84ST4	8.03568	10.2863	4.89191	9.40079	10.1768	9.7812	3	3	6			-0.648444	1.22144	-4.02102	0.0593569	0.276531	1.0941		-0.336339						-1.35522	2.54937	-8.36983	0.12455	0.558032	2.20764			-1.35522	2.54937	-8.36983	0.12455	0.558032	2.20764		0.0759276		3.3553	1.46945	0.361119
A3A2W2	6.05985	9.17385	3.72225	8.02142	11.7284	9.77913	3	3	6			-2.62427	0.108965	-5.19068	-1.32001	1.82812	1.09203		-1.01764						-5.48462	0.22743	-10.8045	-2.76981	3.68909	2.20347			-5.48462	0.22743	-10.8045	-2.76981	3.68909	2.20347		0.546444		6.39482	2.62455	0.162156
Q0E0C6	6.72615	8.61198	7.4733	10.5446	9.40854	9.77872	3	3	6			-1.95797	-0.452903	-1.43962	1.20314	-0.491723	1.09162		-0.341243						-4.09209	-0.945294	-2.99661	2.52457	-0.992281	2.20264			-4.09209	-0.945294	-2.99661	2.52457	-0.992281	2.20264		0.806023		3.92297	4.20889	0.0540752
Q0JL44	10.7044	8.38465	7.22786	8.25833	9.89567	9.77586	3	3	6			2.0203	-0.680233	-1.68507	-1.08311	-0.00459885	1.08876		-0.0573238						4.22235	-1.41977	-3.5075	-2.2727	-0.00928032	2.19687			4.22235	-1.41977	-3.5075	-2.2727	-0.00928032	2.19687		0.47601		0.206603	0.086987	0.941487
Q7XKV5	8.23769	9.05721	8.00815	7.82362	9.63074	9.77507	3	3	6			-0.446435	-0.00768055	-0.904775	-1.51782	-0.269525	1.08797		-0.343043						-0.933033	-0.0160308	-1.88331	-3.18486	-0.543892	2.19527			-0.933033	-0.0160308	-1.88331	-3.18486	-0.543892	2.19527		0.215013		0.432963	0.312414	0.805293
Q6Z6L1	9.28767	9.3897	10.3206	10.4019	10.7324	9.77215	3	3	6			0.603543	0.324809	1.40765	1.06051	0.832157	1.08506		0.885621						1.26138	0.677937	2.93006	2.22529	1.67927	2.18938			1.26138	0.677937	2.93006	2.22529	1.67927	2.18938		0.127824		0.408187	0.761665	0.589815
Q10S25	10.1814	10.5635	8.47869	10.5756	9.93006	9.77208	3	3	6			1.49728	1.4986	-0.434235	1.2342	0.0297922	1.08499		0.818436						3.12925	3.12785	-0.903869	2.58974	0.0601197	2.18925			3.12925	3.12785	-0.903869	2.58974	0.0601197	2.18925		0.508677		-0.171375	0.124007	0.917636
A2XUN8	10.6746	6.24931	10.9603	9.01575	7.72887	9.7705	3	3	6			1.99051	-2.81557	2.04737	-0.325688	-2.17139	1.0834		-0.0318952						4.16009	-5.87663	4.26164	-0.683397	-4.3818	2.18605			4.16009	-5.87663	4.26164	-0.683397	-4.3818	2.18605		0.48439		-1.80808	0.590537	0.664096
Q8LH82	12.9902	10.5771	9.01184	4.46499	5.63174	9.76994	3	3	6			4.30603	1.51216	0.0989188	-4.87644	-4.26852	1.08284		-0.357501						8.99945	3.15617	0.205901	-10.2323	-8.61374	2.18492			8.99945	3.15617	0.205901	-10.2323	-8.61374	2.18492		0.610652		-9.67422	3.21933	0.10737
Q7F0R1	6.18347	10.0396	7.32103	11.7663	11.1687	9.76961	3	3	6			-2.50066	0.974717	-1.5919	2.42484	1.26841	1.08251		0.276321						-5.22628	2.03442	-3.31357	5.0881	2.5596	2.18425			-5.22628	2.03442	-3.31357	5.0881	2.5596	2.18425		0.299498		5.44579	3.60942	0.0819326
Q7X8B5	9.85337	9.39776	10.0864	11.1224	11.6763	9.7688	3	3	6			1.16925	0.332873	1.17348	1.781	1.77604	1.0817		1.21906						2.44368	0.694769	2.44262	3.73711	3.584	2.18262			2.44368	0.694769	2.44262	3.73711	3.584	2.18262		0.83742		1.30755	2.62297	0.162333
Q0J0A4	5.7517	10.9355	5.59114	8.24098	8.41625	9.76772	3	3	6			-2.93242	1.87065	-3.32178	-1.10046	-1.48402	1.08063		-0.981233						-6.12864	3.90439	-6.91436	-2.30911	-2.9947	2.18045			-6.12864	3.90439	-6.91436	-2.30911	-2.9947	2.18045		0.356812		2.00509	0.668094	0.629338
Q7XHW5	8.66153	8.41912	10.4563	10.9497	9.38746	9.76714	3	3	6			-0.0225945	-0.64577	1.54333	1.60824	-0.512808	1.08005		0.508408						-0.0472217	-1.34784	3.21247	3.37461	-1.03483	2.17928			-0.0472217	-1.34784	3.21247	3.37461	-1.03483	2.17928		0.970284		0.900551	0.602447	0.658636
Q9AV71	9.89738	10.2268	10.2588	12.6532	11.131	9.76119	3	3	6			1.21325	1.16189	1.34588	3.31177	1.23069	1.07409		1.55626						2.53565	2.42508	2.80147	6.94914	2.4835	2.16726			2.53565	2.42508	2.80147	6.94914	2.4835	2.16726		0.0104126		1.27923	1.01537	0.494702
B7F9G7	6.36082	7.44634	8.43775	7.30843	8.47841	9.75997	3	3	6			-2.3233	-1.61855	-0.475171	-2.03301	-1.42186	1.07288		-1.13317						-4.85561	-3.37821	-0.989079	-4.2659	-2.86927	2.16481			-4.85561	-3.37821	-0.989079	-4.2659	-2.86927	2.16481		0.499321		1.41752	0.827191	0.563625
Q6I581	9.95739	9.651	7.48115	9.84084	11.7369	9.75936	3	3	6			1.27327	0.586111	-1.43177	0.499404	1.83664	1.07226		0.63932						2.66108	1.22332	-2.98026	1.04791	3.70629	2.16357			2.66108	1.22332	-2.98026	1.04791	3.70629	2.16357		0.343487		2.00454	1.54897	0.341755
A0A0N7KJT8	10.025	9.88766	8.54388	10.4606	11.1283	9.75862	3	3	6			1.34088	0.822775	-0.369041	1.11912	1.22805	1.07153		0.868886						2.80238	1.71729	-0.768167	2.34827	2.47817	2.16209			2.80238	1.71729	-0.768167	2.34827	2.47817	2.16209		0.0149534		1.07901	1.26973	0.414738
Q6I587	10.1124	7.99339	10.1504	6.45989	10.0488	9.75772	3	3	6			1.42832	-1.0715	1.23746	-2.88155	0.148494	1.07063		-0.0113573						2.98513	-2.23641	2.5758	-6.04641	0.299657	2.16028			2.98513	-2.23641	2.5758	-6.04641	0.299657	2.16028		0.625822		-2.30366	1.04405	0.484964
Q10HD0	10.6186	11.2058	11.0695	10.192	12.4739	9.75654	3	3	6			1.93445	2.14091	2.15659	0.850609	2.57362	1.06945		1.7876						4.04292	4.46847	4.48899	1.78485	5.19348	2.15789			4.04292	4.46847	4.48899	1.78485	5.19348	2.15789		0.035639		-1.28806	1.49463	0.354872
Q0DCT8	11.1266	8.94503	9.68368	10.5845	9.24015	9.75427	3	3	6			2.44245	-0.119853	0.770755	1.24306	-0.660118	1.06718		0.790578						5.10463	-0.250156	1.60434	2.60833	-1.3321	2.15331			5.10463	-0.250156	1.60434	2.60833	-1.3321	2.15331		0.771853		-1.00976	0.64218	0.640744
Q10K62	9.3886	9.32856	10.4233	11.3866	11.9046	9.75377	3	3	6			0.704475	0.263676	1.5104	2.04518	2.00429	1.06667		1.26578						1.47233	0.550341	3.14393	4.29144	4.0446	2.1523			1.47233	0.550341	3.14393	4.29144	4.0446	2.1523		0.884157		1.77391	2.68208	0.155816
Q0DV28	9.01505	10.545	9.26894	12.896	10.771	9.75246	3	3	6			0.330929	1.48008	0.356016	3.55454	0.870729	1.06537		1.27628						0.69163	3.0892	0.741055	7.45855	1.7571	2.14966			0.69163	3.0892	0.741055	7.45855	1.7571	2.14966		0.31243		2.28114	1.6528	0.318023
Q7XR60	9.24196	8.7909	7.18458	11.4966	9.61673	9.75181	3	3	6			0.557836	-0.273985	-1.72835	2.15512	-0.283532	1.06472		0.248635						1.16586	-0.571858	-3.59759	4.52212	-0.572159	2.14835			1.16586	-0.571858	-3.59759	4.52212	-0.572159	2.14835		0.944178		3.03397	2.26165	0.208533
Q69UP6	10.9581	9.96512	12.6754	10.5165	10.4859	9.7499	3	3	6			2.27399	0.900233	3.76244	1.17505	0.585665	1.06281		1.6267						4.75256	1.87896	7.83159	2.46563	1.18185	2.1445			4.75256	1.87896	7.83159	2.46563	1.18185	2.1445		0.0958964		-2.89038	2.50501	0.176164
Q0J954	9.53465	9.48006	4.775	11.4388	9.01092	9.74948	3	3	6			0.85053	0.415176	-4.13793	2.09735	-0.889345	1.06239		-0.100303						1.77757	0.86655	-8.61318	4.40092	-1.79467	2.14365			1.77757	0.86655	-8.61318	4.40092	-1.79467	2.14365		0.457908		3.57298	1.32754	0.398447
Q9AV57	8.61195	9.59466	9.80105	10.8806	11.2799	9.74896	3	3	6			-0.0721763	0.529773	0.888122	1.53914	1.37964	1.06187		0.887728						-0.150846	1.10574	1.84864	3.22961	2.78406	2.1426			-0.150846	1.10574	1.84864	3.22961	2.78406	2.1426		0.452391		1.78425	4.19309	0.0546708
A0A0P0WL81	11.0339	9.74535	9.93561	10.5871	9.89364	9.74493	3	3	6			2.34978	0.680468	1.02268	1.24568	-0.00662977	1.05784		1.0583						4.91095	1.42026	2.12874	2.61384	-0.0133787	2.13447			4.91095	1.42026	2.12874	2.61384	-0.0133787	2.13447		0.730139		-1.24167	1.30191	0.40559
Q42971	10.215	11.4073	9.58289	10.986	12.2875	9.74468	3	3	6			1.53092	2.34238	0.669971	1.64455	2.38725	1.05759		1.60544						3.19957	4.88899	1.39456	3.45078	4.81738	2.13396			3.19957	4.88899	1.39456	3.45078	4.81738	2.13396		0.741778		0.306337	0.283611	0.821532
Q9FK44	9.42608	5.0249	10.2088	9.08154	8.87049	9.74389	3	3	6			0.741953	-4.03999	1.29592	-0.259901	-1.02978	1.0568		-0.3725						1.55065	-8.43222	2.69749	-0.545354	-2.07806	2.13237			1.55065	-8.43222	2.69749	-0.545354	-2.07806	2.13237		0.216169		1.23101	0.398397	0.758701
Q08480	9.24676	11.4913	10.4216	12.8381	12.2543	9.7402	3	3	6			0.562641	2.42641	1.50872	3.49664	2.354	1.05311		1.90025						1.1759	5.06438	3.14043	7.33708	4.75029	2.12492			1.1759	5.06438	3.14043	7.33708	4.75029	2.12492		0.715139		1.61052	1.18673	0.439299
Q0DBF4	6.63209	6.3595	7.3435	11.0984	8.47302	9.73958	3	3	6			-2.05203	-2.70538	-1.56943	1.75699	-1.42725	1.05248		-0.824103						-4.28866	-5.64664	-3.2668	3.68673	-2.88014	2.12366			-4.28866	-5.64664	-3.2668	3.68673	-2.88014	2.12366		0.216077		5.37745	4.00337	0.062354
Q69RJ0	10.5435	11.0325	11.2563	10.2195	11.2177	9.73777	3	3	6			1.85939	1.96757	2.3434	0.878094	1.31745	1.05068		1.56943						3.88606	4.10669	4.87784	1.84252	2.65857	2.12002			3.88606	4.10669	4.87784	1.84252	2.65857	2.12002		0.776686		-2.08316	7.47504	0.00562069
Q9AV39	9.85496	7.03639	8.46781	11.1011	8.27673	9.73329	3	3	6			1.17084	-2.02849	-0.445114	1.75968	-1.62354	1.04619		-0.0200712						2.44701	-4.23385	-0.926515	3.69238	-3.27624	2.11097			2.44701	-4.23385	-0.926515	3.69238	-3.27624	2.11097		0.910692		1.74682	0.80061	0.574106
B7EJ91	11.219	11.6574	10.7262	10.895	11.1536	9.73088	3	3	6			2.53486	2.59248	1.81329	1.55353	1.25335	1.04378		1.79855						5.29777	5.41098	3.77441	3.25981	2.52922	2.10611			5.29777	5.41098	3.77441	3.25981	2.52922	2.10611		0.579341		-2.19601	5.33778	0.0247267
Q2QYU2	9.64128	8.83245	8.06958	6.86641	5.23178	9.72908	3	3	6			0.957152	-0.23244	-0.843339	-2.47502	-4.66849	1.04198		-1.03669						2.00041	-0.485146	-1.75543	-5.19339	-9.42086	2.10247			2.00041	-0.485146	-1.75543	-5.19339	-9.42086	2.10247		0.193971		-4.09054	1.67851	0.312404
Q8H045	8.81317	9.05257	10.0271	11.3203	10.4285	9.72843	3	3	6			0.129049	-0.0123191	1.11415	1.97891	0.5282	1.04134		0.796555						0.269707	-0.0257122	2.31913	4.15239	1.06589	2.10117			0.269707	-0.0257122	2.31913	4.15239	1.06589	2.10117		0.795862		1.58544	2.02049	0.246475
Q6ZCX3	8.10732	10.3031	11.028	11.7358	11.8194	9.72811	3	3	6			-0.576802	1.23821	2.11505	2.39437	1.91916	1.04101		1.35517						-1.20549	2.58437	4.40252	5.02416	3.87279	2.10052			-1.20549	2.58437	4.40252	5.02416	3.87279	2.10052		0.418917		1.73869	1.31351	0.402342
Q6Z7K5	7.20369	9.09629	10.7616	9.01022	12.7575	9.72656	3	3	6			-1.48043	0.0314064	1.84871	-0.331217	2.85727	1.03946		0.660867						-3.09405	0.065551	3.84813	-0.694999	5.76588	2.09739			-3.09405	0.065551	3.84813	-0.694999	5.76588	2.09739		0.929979		2.11621	1.04831	0.483535
Q5JMF2	9.03768	9.1364	11.7466	9.27193	9.35876	9.72293	3	3	6			0.353561	0.0715145	2.83367	-0.0695074	-0.541504	1.03583		0.613929						0.738929	0.149264	5.89835	-0.145849	-1.09274	2.09006			0.738929	0.149264	5.89835	-0.145849	-1.09274	2.09006		0.421488		-1.97836	1.35734	0.390301
B9FKW9	10.5583	7.45344	9.57439	7.59462	11.1636	9.72274	3	3	6			1.8742	-1.61145	0.661462	-1.74681	1.26332	1.03565		0.246061						3.91701	-3.3634	1.37685	-3.66537	2.54934	2.08969			3.91701	-3.3634	1.37685	-3.66537	2.54934	2.08969		0.935196		-0.318933	0.122817	0.918393
Q53PP5	8.34572	10.2875	10.7815	9.75201	9.18252	9.72185	3	3	6			-0.338408	1.22259	1.8686	0.410575	-0.717747	1.03476		0.580062						-0.707259	2.55178	3.88953	0.861518	-1.44839	2.08789			-0.707259	2.55178	3.88953	0.861518	-1.44839	2.08789		0.731567		-1.41101	1.13084	0.456651
Q7GBF8	7.95262	9.24945	8.62143	9.00764	8.11936	9.72077	3	3	6			-0.731498	0.184558	-0.291494	-0.333793	-1.78091	1.03368		-0.319909						-1.5288	0.385208	-0.606751	-0.700405	-3.59382	2.08572			-1.5288	0.385208	-0.606751	-0.700405	-3.59382	2.08572		0.204034		-0.152717	0.0986436	0.933911
A2XN40	8.8226	8.34056	4.28976	9.87447	9.24667	9.72065	3	3	6			0.138479	-0.724325	-4.62316	0.533037	-0.653596	1.03356		-0.716001						0.289417	-1.5118	-9.62321	1.11848	-1.31893	2.08548			0.289417	-1.5118	-9.62321	1.11848	-1.31893	2.08548		0.198811		4.24354	1.96003	0.257023
Q6K881	11.4404	11.2554	9.90536	12.1758	8.7499	9.72055	3	3	6			2.75623	2.19055	0.992433	2.83436	-1.15036	1.03346		1.44278						5.76041	4.5721	2.06577	5.9474	-2.32139	2.08527			5.76041	4.5721	2.06577	5.9474	-2.32139	2.08527		0.344116		-2.229	1.17245	0.443669
Q5SMK6	7.8421	7.11291	9.74147	11.1273	9.87427	9.71977	3	3	6			-0.842024	-1.95198	0.828544	1.78591	-0.0259906	1.03267		0.137856						-1.7598	-4.07415	1.72463	3.74741	-0.0524482	2.08369			-1.7598	-4.07415	1.72463	3.74741	-0.0524482	2.08369		0.597312		3.29599	2.49988	0.176792
Q69VD5	13.7505	14.0421	6.23341	16.2801	15.8586	9.7184	3	3	6			5.06637	4.9772	-2.67951	6.93863	5.9583	1.0313		3.54871						10.5885	10.3884	-5.57747	14.5595	12.0237	2.08092			10.5885	10.3884	-5.57747	14.5595	12.0237	2.08092		0.67157		4.42154	0.894552	0.537914
A2Y720	5.89438	8.30884	7.99305	10.3306	11.7674	9.71706	3	3	6			-2.78974	-0.756048	-0.919872	0.989144	1.86713	1.02997		-0.0965699						-5.83045	-1.57801	-1.91473	2.07554	3.76781	2.07823			-5.83045	-1.57801	-1.91473	2.07554	3.76781	2.07823		0.291404		5.74826	5.82431	0.0176485
Q9FNQ1	11.2332	11.8125	10.2924	12.3649	10.4409	9.71603	3	3	6			2.54908	2.74765	1.37951	3.02344	0.540604	1.02894		1.8782						5.32747	5.73486	2.87149	6.34413	1.09092	2.07615			5.32747	5.73486	2.87149	6.34413	1.09092	2.07615		0.470641		-1.47421	1.09321	0.468716
Q53RJ5	12.3345	10.9805	10.5886	11.4543	11.2451	9.71541	3	3	6			3.6504	1.91561	1.6757	2.11286	1.34487	1.02832		1.95463						7.6292	3.99824	3.488	4.43346	2.71391	2.0749			7.6292	3.99824	3.488	4.43346	2.71391	2.0749		0.451801		-1.96439	1.96815	0.255581
Q69T21	11.151	10.2959	5.90393	8.65814	10.6064	9.70755	3	3	6			2.46689	1.231	-3.00899	-0.683297	0.70614	1.02045		0.288699						5.15571	2.56932	-6.26328	-1.43378	1.42497	2.05904			5.15571	2.56932	-6.26328	-1.43378	1.42497	2.05904		0.176148		0.196159	0.0598205	0.959384
Q943F3	10.913	10.6614	9.94398	12.1042	9.9757	9.70439	3	3	6			2.22892	1.59653	1.03106	2.76277	0.0754397	1.01729		1.452						4.65835	3.33227	2.14617	5.79717	0.152235	2.05266			4.65835	3.33227	2.14617	5.79717	0.152235	2.05266		0.321372		-0.711573	0.48543	0.714284
P93008	7.51743	9.12559	8.05723	9.63307	11.0466	9.70259	3	3	6			-1.16669	0.0607072	-0.85569	0.291631	1.14638	1.01549		0.0819723						-2.43834	0.126707	-1.78114	0.611934	2.31336	2.04903			-2.43834	0.126707	-1.78114	0.611934	2.31336	2.04903		0.641527		3.02236	4.97799	0.0317303
Q0PCS3	10.2528	10.3461	10.902	10.9335	12.3078	9.70176	3	3	6			1.56866	1.28118	1.98907	1.59211	2.40751	1.01466		1.6422						3.27844	2.67407	4.1403	3.34075	4.85827	2.04735			3.27844	2.67407	4.1403	3.34075	4.85827	2.04735		0.430515		0.0511836	0.0616564	0.958163
P40392	7.01915	9.15454	7.15127	10.4886	9.11889	9.70105	3	3	6			-1.66498	0.0896526	-1.76165	1.14721	-0.781376	1.01395		-0.326199						-3.47974	0.187122	-3.66692	2.40721	-1.57679	2.04592			-3.47974	0.187122	-3.66692	2.40721	-1.57679	2.04592		0.986213		3.27862	2.8323	0.140408
Q0DKP3	7.79876	9.68578	7.87578	8.72687	10.0275	9.69879	3	3	6			-0.88536	0.620895	-1.03714	-0.614572	0.127226	1.0117		-0.129543						-1.85037	1.29593	-2.15884	-1.28957	0.256739	2.04136			-1.85037	1.29593	-2.15884	-1.28957	0.256739	2.04136		0.863769		1.2406	1.16938	0.444612
Q7XPK7	8.91064	7.80568	8.39708	9.64521	12.9077	9.69528	3	3	6			0.226519	-1.25921	-0.515848	0.303771	3.00741	1.00819		0.461806						0.473417	-2.6282	-1.07375	0.637408	6.06886	2.03428			0.473417	-2.6282	-1.07375	0.637408	6.06886	2.03428		0.464289		3.9897	3.3464	0.0983182
Q2QZF1	10.3576	4.02396	11.8662	10.3276	7.92131	9.69289	3	3	6			1.67343	-5.04092	2.95331	0.986115	-1.97896	1.0058		-0.0668708						3.4974	-10.5214	6.14738	2.06919	-3.99348	2.02947			3.4974	-10.5214	6.14738	2.06919	-3.99348	2.02947		0.263455		0.327248	0.0652062	0.955809
Q10MW6	12.356	9.36505	10.0778	9.68685	11.6109	9.69246	3	3	6			3.67183	0.300167	1.16483	0.345413	1.71062	1.00536		1.36637						7.67399	0.626504	2.42461	0.724788	3.45198	2.02859			7.67399	0.626504	2.42461	0.724788	3.45198	2.02859		0.243692		-1.50658	0.886762	0.540827
Q10LG8	10.9563	8.24503	11.8503	10.7515	7.4475	9.69139	3	3	6			2.27218	-0.819857	2.93742	1.41011	-2.45277	1.0043		0.72523						4.74877	-1.7112	6.1143	2.95885	-4.94961	2.02644			4.74877	-1.7112	6.1143	2.95885	-4.94961	2.02644		0.966603		-3.03873	1.21493	0.430795
Q653N3	9.65875	10.0888	11.418	12.3947	10.4386	9.68872	3	3	6			0.974624	1.0239	2.50509	3.05329	0.538319	1.00163		1.51614						2.03693	2.13707	5.21439	6.40678	1.08631	2.02105			2.03693	2.13707	5.21439	6.40678	1.08631	2.02105		0.575838		0.0419169	0.0235248	0.983826
Q53P49	9.43112	8.01022	5.57374	7.4002	11.674	9.68454	3	3	6			0.746998	-1.05467	-3.33919	-1.94124	1.77371	0.997444		-0.469491						1.5612	-2.20129	-6.95058	-4.07334	3.57928	2.01261			1.5612	-2.20129	-6.95058	-4.07334	3.57928	2.01261		0.946401		3.03641	1.24668	0.421416
Q69TG5	8.64659	8.9419	8.94682	6.8653	10.9249	9.67909	3	3	6			-0.0375285	-0.122989	0.0338951	-2.47614	1.02462	0.991999		-0.0976897						-0.0784332	-0.2567	0.0705534	-5.19573	2.06765	2.00162			-0.0784332	-0.2567	0.0705534	-5.19573	2.06765	2.00162		0.00307611		-0.287292	0.126508	0.916046
Q9ZVW2	10.0388	9.92365	11.3476	12.9975	13.001	9.67791	3	3	6			1.35466	0.858767	2.4347	3.65602	3.10077	0.990819		2.06596						2.83118	1.79241	5.06788	7.67151	6.25726	1.99924			2.83118	1.79241	5.06788	7.67151	6.25726	1.99924		0.486444		2.07885	1.52056	0.34855
Q65XL5	9.79113	11.6185	10.5408	10.1144	9.51743	9.67631	3	3	6			1.10701	2.55364	1.62788	0.772956	-0.382832	0.989216		1.11131						2.3136	5.32992	3.38847	1.62191	-0.772542	1.996			2.3136	5.32992	3.38847	1.62191	-0.772542	1.996		0.982419		-2.72887	3.44059	0.0921041
Q2QN36	7.3249	8.23141	4.42982	7.26294	12.2125	9.67444	3	3	6			-1.35922	-0.833474	-4.48311	-2.0785	2.31223	0.987345		-0.909121						-2.84072	-1.73962	-9.33168	-4.36135	4.66601	1.99223			-2.84072	-1.73962	-9.33168	-4.36135	4.66601	1.99223		0.878146		5.40297	2.28496	0.205192
Q9ZUL5	11.5624	9.19049	10.3219	12.8711	8.15805	9.67419	3	3	6			2.87831	0.125604	1.409	3.52966	-1.74221	0.987098		1.19791						6.01556	0.26216	2.93287	7.40635	-3.51572	1.99173			6.01556	0.26216	2.93287	7.40635	-3.51572	1.99173		0.434996		-1.10941	0.374909	0.771154
Q5N8Q4	9.35191	8.31002	9.84101	7.95006	11.3382	9.67322	3	3	6			0.667788	-0.754865	0.92809	-1.39138	1.43797	0.986127		0.312289						1.39565	-1.57555	1.93184	-2.91955	2.90178	1.98977			1.39565	-1.57555	1.93184	-2.91955	2.90178	1.98977		0.533841		0.0733491	0.038079	0.973951
P35684	10.6989	12.0984	10.785	10.9103	11.2253	9.67285	3	3	6			2.01476	3.03347	1.87212	1.56883	1.32506	0.985756		1.8						4.21076	6.33143	3.89686	3.29191	2.67393	1.98902			4.21076	6.33143	3.89686	3.29191	2.67393	1.98902		0.389937		-2.1614	3.96062	0.0642296
Q7XMK0	8.90851	9.41739	10.5693	10.2508	10.8856	9.67258	3	3	6			0.224389	0.352501	1.65636	0.909335	0.985355	0.98549		0.852239						0.468965	0.735736	3.44775	1.90808	1.98841	1.98849			0.468965	0.735736	3.44775	1.90808	1.98841	1.98849		0.00158411		0.41084	0.498049	0.708063
Q0DUI8	10.6424	9.0393	8.76029	9.97212	11.0581	9.67129	3	3	6			1.95829	-0.0255842	-0.152636	0.630681	1.15786	0.984199		0.758802						4.09275	-0.053399	-0.317715	1.32337	2.33653	1.98588			4.09275	-0.053399	-0.317715	1.32337	2.33653	1.98588		0.0829411		0.641381	0.550311	0.682873
P46465	7.57871	9.27184	8.17168	10.9917	9.46512	9.6711	3	3	6			-1.10541	0.206949	-0.741246	1.6503	-0.435148	0.984005		0.0932411						-2.31027	0.431942	-1.54292	3.46285	-0.878114	1.98549			-2.31027	0.431942	-1.54292	3.46285	-0.878114	1.98549		0.582442		2.66382	2.70631	0.153221
Q9ZVP8	11.3104	8.97407	6.48499	8.38655	11.3728	9.67094	3	3	6			2.62626	-0.0908167	-2.42793	-0.954885	1.47255	0.983845		0.26817						5.48879	-0.189552	-5.05379	-2.00365	2.97155	1.98517			5.48879	-0.189552	-5.05379	-2.00365	2.97155	1.98517		0.399032		0.902539	0.31463	0.804057
Q02897	9.75121	10.1983	7.06124	10.4964	9.09046	9.66869	3	3	6			1.06709	1.13344	-1.85169	1.15492	-0.809808	0.981596		0.279256						2.23017	2.36569	-3.85433	2.42339	-1.63417	1.98063			2.23017	2.36569	-3.85433	2.42339	-1.63417	1.98063		0.563778		0.676104	0.33308	0.79384
Q5JM04	9.54189	8.97169	10.5711	9.14787	10.7827	9.66702	3	3	6			0.857767	-0.0931999	1.65817	-0.193571	0.882406	0.979929		0.681916						1.7927	-0.194526	3.45151	-0.406174	1.78067	1.97726			1.7927	-0.194526	3.45151	-0.406174	1.78067	1.97726		0.688727		-0.565975	0.543464	0.686122
Q68Y52	10.0412	10.7124	9.17665	9.78269	10.2853	9.66528	3	3	6			1.35713	1.64755	0.263723	0.44125	0.385022	0.978189		0.845477						2.83634	3.43875	0.548946	0.925883	0.776961	1.97375			2.83634	3.43875	0.548946	0.925883	0.776961	1.97375		0.309422		-1.04915	1.57908	0.334696
Q8LT05	8.57558	7.33101	9.34587	10.8938	10.2603	9.664	3	3	6			-0.108546	-1.73388	0.432947	1.5524	0.360067	0.976909		0.246649						-0.226857	-3.61893	0.901189	3.25742	0.726603	1.97117			-0.226857	-3.61893	0.901189	3.25742	0.726603	1.97117		0.448797		2.9666	2.97973	0.126769
Q0IQN5	9.40803	9.99393	11.3417	9.45683	7.01033	9.66048	3	3	6			0.723909	0.929042	2.42876	0.115389	-2.88993	0.973383		0.380092						1.51294	1.93909	5.05552	0.242124	-5.83179	1.96406			1.51294	1.93909	5.05552	0.242124	-5.83179	1.96406		0.364711		-4.04439	2.34488	0.196843
Q10D80	8.05642	8.78447	6.47879	7.61375	11.2733	9.65976	3	3	6			-0.627702	-0.280416	-2.43413	-1.72768	1.37306	0.97267		-0.454033						-1.31187	-0.585281	-5.06669	-3.62523	2.7708	1.96262			-1.31187	-0.585281	-5.06669	-3.62523	2.7708	1.96262		0.645784		2.69068	1.58778	0.332683
Q0JLC5	8.63227	9.34654	10.0269	11.8921	10.1599	9.65943	3	3	6			-0.051855	0.281649	1.11401	2.55069	0.259606	0.972331		0.854406						-0.108375	0.587854	2.31885	5.35216	0.523877	1.96193			-0.108375	0.587854	2.31885	5.35216	0.523877	1.96193		0.405327		1.67988	1.49912	0.35377
Q9XJ29	8.01341	11.136	8.36194	10.5327	12.1854	9.65676	3	3	6			-0.670717	2.07108	-0.55098	1.19131	2.28514	0.96967		0.882583						-1.40177	4.32273	-1.14688	2.49975	4.61133	1.95656			-1.40177	4.32273	-1.14688	2.49975	4.61133	1.95656		0.316597		2.43119	1.74548	0.298235
B9FL70	9.75759	9.95825	10.4049	11.604	10.4311	9.65276	3	3	6			1.07347	0.893361	1.49201	2.26256	0.530815	0.965661		1.20298						2.2435	1.86461	3.10564	4.74757	1.07117	1.94848			2.2435	1.86461	3.10564	4.74757	1.07117	1.94848		0.197737		0.184486	0.180939	0.882129
Q93Y16	10.2772	8.6458	11.3461	10.0287	11.1755	9.65139	3	3	6			1.59305	-0.419085	2.43315	0.687298	1.27528	0.964299		1.089						3.32941	-0.874708	5.06465	1.44217	2.57348	1.94573			3.32941	-0.874708	5.06465	1.44217	2.57348	1.94573		0.0665934		-0.519323	0.346437	0.786524
Q9SNQ6	11.3909	10.2174	9.74022	11.5352	11.1809	9.64605	3	3	6			2.70674	1.15246	0.827296	2.19374	1.28064	0.958961		1.51997						5.65699	2.40541	1.72203	4.60317	2.58429	1.93495			5.65699	2.40541	1.72203	4.60317	2.58429	1.93495		0.609162		-0.220675	0.173251	0.886842
O22255	7.51909	9.92463	8.62596	7.48132	8.25795	9.64452	3	3	6			-1.16504	0.859747	-0.286959	-1.86012	-1.64231	0.957429		-0.522876						-2.43488	1.79445	-0.597311	-3.90313	-3.31413	1.93186			-2.43488	1.79445	-0.597311	-3.90313	-3.31413	1.93186		0.607082		-1.34922	0.794481	0.576551
Q8H8C6	10.29	9.93733	10.3359	9.16055	10.8347	9.64288	3	3	6			1.6059	0.872443	1.42303	-0.180885	0.934443	0.955788		0.935118						3.35626	1.82095	2.96206	-0.379555	1.88568	1.92855			3.35626	1.82095	2.96206	-0.379555	1.88568	1.92855		0.534452		-1.5682	2.70795	0.153047
Q10MR0	11.2387	3.51134	10.1118	11.5546	11.5641	9.64075	3	3	6			2.55458	-5.55355	1.19886	2.2132	1.66379	0.953657		0.505091						5.33897	-11.5913	2.49546	4.644	3.35747	1.92425			5.33897	-11.5913	2.49546	4.644	3.35747	1.92425		0.0440496		4.56086	1.07013	0.476276
Q651Z7	9.04185	10.0815	12.3704	11.9296	12.6427	9.63967	3	3	6			0.357728	1.0166	3.45744	2.58815	2.74242	0.952572		1.85248						0.747637	2.12183	7.19673	5.43077	5.53411	1.92206			0.747637	2.12183	7.19673	5.43077	5.53411	1.92206		0.536321		0.940252	0.508976	0.702721
Q7XS74	9.19886	5.15967	10.7115	10.0848	12.3838	9.63923	3	3	6			0.514739	-3.90522	1.79857	0.743371	2.48349	0.952138		0.431183						1.07579	-8.15092	3.74376	1.55983	5.01161	1.92119			1.07579	-8.15092	3.74376	1.55983	5.01161	1.92119		0.169162		3.94133	1.49651	0.354409
Q8S1X8	8.87909	7.67934	8.51385	7.00675	10.1356	9.6392	3	3	6			0.19497	-1.38555	-0.399077	-2.33469	0.235316	0.952102		-0.456155						0.407479	-2.8919	-0.830688	-4.89893	0.47486	1.92112			0.407479	-2.8919	-0.830688	-4.89893	0.47486	1.92112		0.354065		0.270719	0.133717	0.91148
Q6H4M2	12.0959	11.2868	7.65971	6.7028	11.2071	9.63802	3	3	6			3.4118	2.22196	-1.25321	-2.63864	1.30687	0.950926		0.666617						7.13053	4.63765	-2.60859	-5.53671	2.63722	1.91874			7.13053	4.63765	-2.60859	-5.53671	2.63722	1.91874		0.889109		-3.38011	1.19402	0.437082
A2ZJC9	7.29719	8.16214	9.04141	10.1712	9.10622	9.63686	3	3	6			-1.38693	-0.902748	0.128489	0.82974	-0.794042	0.949766		-0.195954						-2.89863	-1.8842	0.267453	1.74106	-1.60235	1.9164			-2.89863	-1.8842	0.267453	1.74106	-1.60235	1.9164		0.798644		2.19016	2.23591	0.212288
Q8GVP6	10.2377	8.39008	9.74414	9.56826	7.97487	9.63637	3	3	6			1.55356	-0.674804	0.831221	0.226823	-1.92539	0.949277		0.160115						3.24689	-1.40844	1.7302	0.475947	-3.88538	1.91542			3.24689	-1.40844	1.7302	0.475947	-3.88538	1.91542		0.763805		-1.68756	1.03161	0.489165
Q6F2Y7	8.61338	10.8771	9.8517	12.4159	11.002	9.63459	3	3	6			-0.0707389	1.81224	0.938779	3.07449	1.10171	0.947499		1.30066						-0.147842	3.78249	1.95409	6.45126	2.22321	1.91183			-0.147842	3.78249	1.95409	6.45126	2.22321	1.91183		0.75123		1.66585	1.25353	0.419421
B8AL97	7.64386	12.0244	8.09233	9.64046	9.56527	9.63425	3	3	6			-1.04027	2.95949	-0.820589	0.299025	-0.334992	0.947154		0.33497						-2.17412	6.17701	-1.70807	0.627449	-0.676002	1.91113			-2.17412	6.17701	-1.70807	0.627449	-0.676002	1.91113		0.141237		-0.144081	0.0565343	0.961571
Q651J5	10.4329	11.0794	9.72451	10.5195	10.356	9.63294	3	3	6			1.74873	2.01453	0.81159	1.1781	0.455747	0.945847		1.19242						3.65478	4.2047	1.68934	2.47203	0.919682	1.90849			3.65478	4.2047	1.68934	2.47203	0.919682	1.90849		0.521938		-1.41621	2.42643	0.186025
Q0E3C8	10.3952	8.40501	10.3258	11.9005	12.474	9.63281	3	3	6			1.71109	-0.659873	1.41283	2.55905	2.57369	0.945719		1.42375						3.57611	-1.37728	2.94084	5.36971	5.19363	1.90824			3.57611	-1.37728	2.94084	5.36971	5.19363	1.90824		0.687025		2.44397	1.87769	0.272119
Q94JI5	6.08829	7.13402	7.1979	7.96832	7.5411	9.63205	3	3	6			-2.59583	-1.93087	-1.71502	-1.37312	-2.35917	0.944956		-1.50484						-5.42519	-4.03009	-3.56985	-2.88124	-4.76073	1.9067			-5.42519	-4.03009	-3.56985	-2.88124	-4.76073	1.9067		0.146394		2.42996	1.71844	0.303877
Q9LGR0	7.81596	9.26547	9.73473	10.4103	11.0015	9.63167	3	3	6			-0.868164	0.200587	0.821803	1.06891	1.10128	0.944574		0.544832						-1.81443	0.418663	1.7106	2.24291	2.22236	1.90593			-1.81443	0.418663	1.7106	2.24291	2.22236	1.90593		0.0221923		2.01879	2.41346	0.187705
F4IUJ7	7.85543	6.80232	11.2073	8.75515	10.3812	9.6311	3	3	6			-0.828694	-2.26256	2.2944	-0.586283	0.480953	0.94401		0.00696973						-1.73194	-4.7224	4.77583	-1.23021	0.970548	1.90479			-1.73194	-4.7224	4.77583	-1.23021	0.970548	1.90479		0.197948		1.10788	0.460659	0.726654
Q337A0	9.70594	11.0755	9.25413	8.02956	9.45578	9.63061	3	3	6			1.02182	2.01059	0.341208	-1.31187	-0.444486	0.943519		0.426797						2.13556	4.19648	0.710231	-2.75273	-0.896958	1.9038			2.13556	4.19648	0.710231	-2.75273	-0.896958	1.9038		0.717174		-2.92939	2.66162	0.158042
Q5KQF5	5.37848	9.66181	10.0238	11.0247	12.0536	9.63054	3	3	6			-3.30565	0.596927	1.11083	1.68322	2.15329	0.943446		0.530344						-6.90867	1.2459	2.31222	3.53193	4.34526	1.90365			-6.90867	1.2459	2.31222	3.53193	4.34526	1.90365		0.114545		4.37713	2.19602	0.218238
A3B9A0	10.5562	7.97223	9.18003	5.29252	9.30058	9.63049	3	3	6			1.8721	-1.09265	0.26711	-4.04891	-0.599684	0.943392		-0.443109						3.91261	-2.28057	0.555995	-8.49591	-1.21014	1.90354			3.91261	-2.28057	0.555995	-8.49591	-1.21014	1.90354		0.504548		-3.33018	1.3113	0.402958
Q7XKF4	7.57297	8.82031	10.6036	10.1235	10.305	9.6301	3	3	6			-1.11116	-0.24458	1.6907	0.782038	0.404771	0.943009		0.410797						-2.32228	-0.510485	3.51923	1.64096	0.816814	1.90277			-2.32228	-0.510485	3.51923	1.64096	0.816814	1.90277		0.0693543		1.22469	0.931855	0.524184
A4PBP8	10.0426	7.09202	6.51001	8.41688	10.0084	9.62527	3	3	6			1.35849	-1.97287	-2.40291	-0.924555	0.108164	0.938176		-0.482584						2.8392	-4.11775	-5.00171	-1.94001	0.218271	1.89302			2.8392	-4.11775	-5.00171	-1.94001	0.218271	1.89302		0.333622		2.15051	1.08056	0.472844
Q7Y021	9.46805	9.03513	10.0535	8.47098	10.9801	9.6239	3	3	6			0.783931	-0.0297581	1.1406	-0.870453	1.07987	0.936806		0.506832						1.63838	-0.0621108	2.37417	-1.82649	2.17915	1.89025			1.63838	-0.0621108	2.37417	-1.82649	2.17915	1.89025		0.476634		-0.569177	0.474466	0.719733
Q7XSA2	10.0199	9.62082	10.0885	11.7879	12.6171	9.62352	3	3	6			1.33575	0.555938	1.1756	2.44642	2.71684	0.936422		1.52783						2.79166	1.16035	2.44704	5.13338	5.48248	1.88948			2.79166	1.16035	2.44704	5.13338	5.48248	1.88948		0.316935		2.03543	2.49038	0.177959
Q7XIT1	10.4422	11.6597	8.89648	10.9454	11.8487	9.62311	3	3	6			1.75809	2.59484	-0.0164397	1.60393	1.94848	0.936019		1.47082						3.67435	5.41592	-0.0342196	3.36556	3.93196	1.88866			3.67435	5.41592	-0.0342196	3.36556	3.93196	1.88866		0.251171		0.043379	0.0275685	0.981072
Q6END8	8.85506	9.54934	7.98054	7.95134	10.6194	9.62	3	3	6			0.170932	0.484455	-0.932384	-1.39009	0.71913	0.932906		-0.00250931						0.357241	1.01115	-1.94078	-2.91686	1.45118	1.88238			0.357241	1.01115	-1.94078	-2.91686	1.45118	1.88238		0.508538		0.329696	0.21475	0.861696
Q8W0A1	11.8749	7.2588	7.55397	7.9546	8.97754	9.6195	3	3	6			3.19078	-1.80609	-1.35895	-1.38683	-0.922727	0.932411		-0.225234						6.66861	-3.76964	-2.82868	-2.91002	-1.86203	1.88138			6.66861	-3.76964	-2.82868	-2.91002	-1.86203	1.88138		0.31976		-0.986987	0.322763	0.799537
Q6EX42	8.47529	11.57	10.1032	11.9137	12.6683	9.61842	3	3	6			-0.208836	2.50511	1.19023	2.57228	2.768	0.931328		1.62635						-0.436459	5.22864	2.4775	5.39745	5.58573	1.8792			-0.436459	5.22864	2.4775	5.39745	5.58573	1.8792		0.703907		1.86424	1.28358	0.410774
Q0JEU6	8.74672	10.4513	8.90063	8.67758	12.6134	9.61785	3	3	6			0.0625926	1.38643	-0.0122981	-0.663858	2.71313	0.930759		0.736126						0.130816	2.89373	-0.0255988	-1.39299	5.47501	1.87805			0.130816	2.89373	-0.0255988	-1.39299	5.47501	1.87805		0.372021		0.987042	0.563441	0.676686
Q8LQ92	7.59694	9.535	11.0301	11.0717	11.6693	9.61552	3	3	6			-1.08719	0.470116	2.11719	1.73029	1.76906	0.928425		0.987984						-2.27218	0.98122	4.40698	3.63071	3.56991	1.87334			-2.27218	0.98122	4.40698	3.63071	3.56991	1.87334		0.163792		1.98598	1.39747	0.379593
Q10MH8	11.1328	8.46177	9.68582	7.84103	10.2215	9.61213	3	3	6			2.44863	-0.603121	0.772894	-1.50041	0.321201	0.925037		0.39404						5.11755	-1.25883	1.6088	-3.14833	0.648174	1.86651			5.11755	-1.25883	1.6088	-3.14833	0.648174	1.86651		0.802949		-2.03372	1.17932	0.44156
Q9FY93	6.8254	5.1341	10.7186	9.49671	8.393	9.61138	3	3	6			-1.85872	-3.93079	1.8057	0.155277	-1.50726	0.924281		-0.735253						-3.88465	-8.2043	3.75859	0.32582	-3.0416	1.86498			-3.88465	-8.2043	3.75859	0.32582	-3.0416	1.86498		0.292924		2.49318	0.872635	0.546148
Q6YU51	7.92357	9.83547	9.35365	8.32445	9.22966	9.6089	3	3	6			-0.760558	0.770579	0.440731	-1.01699	-0.670605	0.921808		-0.0525054						-1.58954	1.60834	0.91739	-2.13396	-1.35326	1.85999			-1.58954	1.60834	0.91739	-2.13396	-1.35326	1.85999		0.774413		-0.854476	0.7054	0.613272
Q6ZHC8	11.21	8.91142	10.492	11.1374	10.3613	9.60803	3	3	6			2.52588	-0.153465	1.57903	1.796	0.461021	0.920939		1.18823						5.27899	-0.320311	3.28678	3.76859	0.930325	1.85824			5.27899	-0.320311	3.28678	3.76859	0.930325	1.85824		0.412694		-0.562772	0.367923	0.774897
Q8LIY0	9.19495	7.29002	7.49785	11.0298	10.5074	9.60615	3	3	6			0.510831	-1.77487	-1.41507	1.6884	0.607133	0.919052		0.0892463						1.06762	-3.70448	-2.9455	3.54281	1.22518	1.85443			1.06762	-3.70448	-2.9455	3.54281	1.22518	1.85443		0.358545		4.06826	3.88841	0.0675263
A2WJP3	7.86969	9.20648	7.81166	8.84276	11.0705	9.60411	3	3	6			-0.814437	0.14159	-1.10126	-0.498678	1.17019	0.917014		-0.0309299						-1.70214	0.295525	-2.2923	-1.04639	2.36141	1.85032			-1.70214	0.295525	-2.2923	-1.04639	2.36141	1.85032		0.70514		2.28808	2.66442	0.157735
Q2QX01	8.68004	10.6624	9.40865	8.37951	10.0606	9.60296	3	3	6			-0.00408027	1.59751	0.495725	-0.961929	0.160296	0.915865		0.367232						-0.0085276	3.33431	1.03186	-2.01843	0.323472	1.848			-0.0085276	3.33431	1.03186	-2.01843	0.323472	1.848		0.871027		-1.40154	1.31458	0.402042
O41253	7.20994	7.67349	9.5329	9.70865	11.2422	9.5971	3	3	6			-1.47418	-1.3914	0.619978	0.367216	1.3419	0.910009		0.0622525						-3.08099	-2.90412	1.2905	0.770536	2.7079	1.83618			-3.08099	-2.90412	1.2905	0.770536	2.7079	1.83618		0.266553		3.33641	3.39055	0.0953552
Q8L4E9	8.86446	8.77446	11.1268	6.96405	10.8411	9.59595	3	3	6			0.180341	-0.290429	2.21385	-2.37739	0.940828	0.908853		0.262676						0.376907	-0.606181	4.60817	-4.98851	1.89856	1.83385			0.376907	-0.606181	4.60817	-4.98851	1.89856	1.83385		0.657804		-1.87833	0.89542	0.537591
Q6Z4T5	10.3016	9.01371	8.85894	11.9664	12.352	9.59492	3	3	6			1.61749	-0.0511736	-0.0539789	2.625	2.45175	0.907828		1.24948						3.38049	-0.106809	-0.112358	5.50808	4.94755	1.83178			3.38049	-0.106809	-0.112358	5.50808	4.94755	1.83178		0.982801		3.04203	2.88214	0.135641
Q7XMJ2	7.94889	11.3397	9.49593	10.7274	12.4765	9.59446	3	3	6			-0.73523	2.2748	0.583011	1.38597	2.57623	0.907361		1.16536						-1.5366	4.74793	1.21355	2.90821	5.19874	1.83084			-1.5366	4.74793	1.21355	2.90821	5.19874	1.83084		0.459248		1.83764	1.23342	0.425307
A2WXX3	10.2311	10.3688	10.8552	9.86485	12.2331	9.59363	3	3	6			1.54698	1.30395	1.94226	0.523414	2.33288	0.90654		1.426						3.23312	2.72158	4.04285	1.09829	4.70767	1.82918			3.23312	2.72158	4.04285	1.09829	4.70767	1.82918		0.2173		-0.787472	0.8976	0.536779
Q5W6F1	11.0568	10.278	7.73485	10.2451	12.9918	9.5936	3	3	6			2.37272	1.2131	-1.17808	0.90364	3.09156	0.906503		1.21824						4.95889	2.53196	-2.4522	1.89613	6.23866	1.82911			4.95889	2.53196	-2.4522	1.89613	6.23866	1.82911		0.618032		1.64175	0.822404	0.565499
Q9AWM8	11.8475	9.98968	11.251	10.4802	9.76486	9.58768	3	3	6			3.16336	0.924791	2.33809	1.13875	-0.13541	0.90059		1.38836						6.61131	1.93021	4.86677	2.38946	-0.273253	1.81718			6.61131	1.93021	4.86677	2.38946	-0.273253	1.81718		0.519648		-3.15831	3.08888	0.117532
Q6EUG4	8.17652	4.84649	6.43664	8.44456	8.32827	9.58308	3	3	6			-0.507601	-4.21839	-2.47628	-0.896878	-1.57199	0.895989		-1.46253						-1.06087	-8.80458	-5.15443	-1.88194	-3.17223	1.80789			-1.06087	-8.80458	-5.15443	-1.88194	-3.17223	1.80789		0.616033		3.92453	2.19649	0.218167
Q0J8G4	11.0351	12.0218	10.2183	11.231	11.0451	9.58111	3	3	6			2.35095	2.95693	1.3054	1.8896	1.14488	0.894012		1.75696						4.9134	6.17166	2.71721	3.96499	2.31033	1.8039			4.9134	6.17166	2.71721	3.96499	2.31033	1.8039		0.589492		-1.90768	2.41374	0.187668
Q6Z2Z4	11.1746	12.5884	10.4066	10.4797	12.3332	9.57937	3	3	6			2.49049	3.52348	1.49371	1.13824	2.43297	0.892278		1.99519						5.20503	7.35416	3.10918	2.3884	4.90966	1.80041			5.20503	7.35416	3.10918	2.3884	4.90966	1.80041		0.754358		-2.18997	2.11243	0.231257
Q6K8Z4	9.85523	10.2203	9.80515	11.0199	12.0535	9.5786	3	3	6			1.1711	1.15537	0.892224	1.6785	2.15319	0.891505		1.32365						2.44756	2.41147	1.85718	3.52203	4.34506	1.79885			2.44756	2.41147	1.85718	3.52203	4.34506	1.79885		0.121829		0.983239	1.87357	0.272898
Q60EX6	9.50424	11.3313	11.4139	12.4792	11.2402	9.57781	3	3	6			0.82012	2.26637	2.50102	3.13776	1.33993	0.890712		1.82599						1.71402	4.73033	5.20593	6.58403	2.70394	1.79725			1.71402	4.73033	5.20593	6.58403	2.70394	1.79725		0.713593		-0.188357	0.11561	0.922992
Q0JC27	11.0358	10.9403	10.393	11.0614	11.267	9.57652	3	3	6			2.35171	1.87543	1.48004	1.72	1.3667	0.889428		1.61388						4.91498	3.91437	3.08073	3.60911	2.75795	1.79465			4.91498	3.91437	3.08073	3.60911	2.75795	1.79465		0.98841		-1.24945	2.56429	0.169072
Q6Z8M8	8.05631	9.77281	9.73106	9.46905	10.8242	9.56737	3	3	6			-0.627811	0.707922	0.818141	0.127614	0.923978	0.880273		0.471686						-1.3121	1.47757	1.70298	0.267776	1.86456	1.77618			-1.3121	1.47757	1.70298	0.267776	1.86456	1.77618		0.444262		0.680023	0.811712	0.569705
Q56X76	10.5469	11.5978	9.89589	11.3709	10.8557	9.56695	3	3	6			1.86277	2.53289	0.98297	2.02947	0.95546	0.879854		1.54057						3.89312	5.28661	2.04607	4.25847	1.92809	1.77534			3.89312	5.28661	2.04607	4.25847	1.92809	1.77534		0.845876		-1.08797	1.22346	0.428256
Q8S0F0	10.7527	10.2032	11.3868	9.40231	12.0183	9.564	3	3	6			2.06859	1.13834	2.47391	0.0608714	2.11807	0.876903		1.45611						4.32328	2.37593	5.14949	0.127728	4.27421	1.76938			4.32328	2.37593	5.14949	0.127728	4.27421	1.76938		0.634882		-1.89246	1.91905	0.264428
Q9C813	11.0972	10.4953	11.719	9.20225	12.6635	9.56343	3	3	6			2.41312	1.43037	2.80604	-0.139191	2.76325	0.876331		1.69165						5.04333	2.98545	5.84083	-0.292067	5.57615	1.76823			5.04333	2.98545	5.84083	-0.292067	5.57615	1.76823		0.393446		-2.27243	1.72907	0.301646
Q338X7	5.14784	10.4977	5.17939	10.8261	11.3463	9.55582	3	3	6			-3.53629	1.43277	-3.73353	1.48463	1.44603	0.868722		-0.339612						-7.39071	2.99045	-7.77143	3.11524	2.91804	1.75287			-7.39071	2.99045	-7.77143	3.11524	2.91804	1.75287		0.0286586		6.65261	2.33437	0.198283
Q01401	11.0316	10.0769	9.28432	12.0986	12.4362	9.55365	3	3	6			2.34744	1.01206	0.371392	2.75719	2.53598	0.866554		1.64844						4.90606	2.11236	0.77306	5.78546	5.11752	1.7485			4.90606	2.11236	0.77306	5.78546	5.11752	1.7485		0.974197		1.62	1.30179	0.405623
Q6K977	7.03617	9.83366	10.6375	9.14784	10.3155	9.55363	3	3	6			-1.64795	0.768778	1.72461	-0.193596	0.415224	0.866535		0.322266						-3.44415	1.60458	3.58981	-0.406227	0.837909	1.74846			-3.44415	1.60458	3.58981	-0.406227	0.837909	1.74846		0.163387		0.143302	0.0727056	0.950853
Q0J7Y8	8.65678	9.72588	11.5488	9.47129	12.8135	9.5525	3	3	6			-0.0273409	0.66099	2.6359	0.129852	2.91322	0.865402		1.19634						-0.0571414	1.37961	5.48668	0.272471	5.87877	1.74618			-0.0571414	1.37961	5.48668	0.272471	5.87877	1.74618		0.989889		0.362758	0.175706	0.885334
Q65X71	8.51191	12.52	7.71205	8.8438	8.34687	9.55205	3	3	6			-0.172213	3.45507	-1.20088	-0.497642	-1.5534	0.86496		0.149317						-0.359918	7.21138	-2.49965	-1.04421	-3.1347	1.74528			-0.359918	7.21138	-2.49965	-1.04421	-3.1347	1.74528		0.374306		-2.26181	0.924449	0.526882
A2Y8B9	8.64922	8.87885	8.97728	11.4089	8.34767	9.5495	3	3	6			-0.034903	-0.186039	0.0643565	2.06742	-1.5526	0.862402		0.20344						-0.072946	-0.388299	0.133959	4.33811	-3.1331	1.74012			-0.072946	-0.388299	0.133959	4.33811	-3.1331	1.74012		0.00956998		1.09081	0.58192	0.668074
Q9ZQW8	9.34283	9.63009	12.6361	7.16682	13.7865	9.54776	3	3	6			0.658707	0.565198	3.72323	-2.17462	3.88621	0.860668		1.25323						1.37667	1.17967	7.74997	-4.56305	7.84224	1.73662			1.37667	1.17967	7.74997	-4.56305	7.84224	1.73662		0.532769		-1.7635	0.525178	0.694873
Q9M4X7	10.295	10.0926	10.3592	10.4067	10.5329	9.54595	3	3	6			1.61084	1.02774	1.44628	1.0653	0.632675	0.858855		1.10695						3.3666	2.14508	3.01046	2.23534	1.27672	1.73297			3.3666	2.14508	3.01046	2.23534	1.27672	1.73297		0.736259		-1.09237	3.74021	0.0748317
Q2R2W8	9.61873	11.0605	12.2071	10.2726	11.7031	9.54512	3	3	6			0.934611	1.99561	3.29418	0.931193	1.80286	0.858025		1.63608						1.9533	4.16521	6.85691	1.95394	3.63811	1.73129			1.9533	4.16521	6.85691	1.95394	3.63811	1.73129		0.305442		-1.88402	1.79385	0.288401
Q5NBI2	9.61987	6.32269	8.74076	9.13101	9.67329	9.54504	3	3	6			0.935748	-2.7422	-0.172165	-0.210429	-0.226974	0.857948		-0.259679						1.95568	-5.72349	-0.358364	-0.441548	-0.458025	1.73113			1.95568	-5.72349	-0.358364	-0.441548	-0.458025	1.73113		0.185403		1.65258	0.924278	0.526944
A4FVP6	10.2096	9.49973	12.1674	8.98954	11.3762	9.54495	3	3	6			1.52545	0.434839	3.25443	-0.351901	1.47597	0.857851		1.19944						3.18814	0.907591	6.77417	-0.7384	2.97846	1.73094			3.18814	0.907591	6.77417	-0.7384	2.97846	1.73094		0.580664		-2.29963	1.64417	0.31993
Q5ZC83	4.30961	9.1952	7.51523	8.92656	8.58556	9.5392	3	3	6			-4.37451	0.130313	-1.3977	-0.414874	-1.3147	0.852104		-1.08656						-9.14256	0.271987	-2.90934	-0.870539	-2.65302	1.71934			-9.14256	0.271987	-2.90934	-0.870539	-2.65302	1.71934		0.348147		3.32523	1.57425	0.335818
Q6AU53	11.2364	7.96607	8.55436	10.42	7.42652	9.53844	3	3	6			2.55225	-1.09881	-0.358565	1.07852	-2.47375	0.851347		0.091832						5.3341	-2.29343	-0.74636	2.26309	-4.99194	1.71782			5.3341	-2.29343	-0.74636	2.26309	-4.99194	1.71782		0.997909		-1.10178	0.40558	0.754933
Q8H5D4	11.0676	8.44679	9.28658	8.02065	12.1017	9.53666	3	3	6			2.38351	-0.618093	0.373657	-1.32079	2.20142	0.849561		0.644877						4.98145	-1.29008	0.777776	-2.77144	4.44238	1.71421			4.98145	-1.29008	0.777776	-2.77144	4.44238	1.71421		0.869932		-0.361331	0.146454	0.903468
O49289	9.60426	6.69181	9.25948	9.50559	11.0964	9.53062	3	3	6			0.920133	-2.37307	0.346561	0.164156	1.19612	0.843527		0.182904						1.92304	-4.95305	0.721374	0.344452	2.41373	1.70204			1.92304	-4.95305	0.721374	0.344452	2.41373	1.70204		0.151481		2.25628	1.45749	0.364126
Q6AT25	9.57433	10.5261	9.52085	9.20862	11.245	9.52961	3	3	6			0.890205	1.46122	0.607931	-0.132813	1.34475	0.842512		0.835635						1.8605	3.04984	1.26542	-0.278683	2.71367	1.69999			1.8605	3.04984	1.26542	-0.278683	2.71367	1.69999		0.525507		-0.680262	0.88211	0.542573
Q8VXB5	9.7397	10.4473	8.90986	7.56659	9.61458	9.52904	3	3	6			1.05557	1.3824	-0.00306038	-1.77485	-0.285684	0.841946		0.202721						2.20611	2.88533	-0.00637025	-3.7242	-0.576501	1.69885			2.20611	2.88533	-0.00637025	-3.7242	-0.576501	1.69885		0.471316		-2.56231	2.13712	0.227333
A3BPF2	6.60921	9.62236	10.151	5.12172	10.9572	9.52777	3	3	6			-2.07491	0.557476	1.23809	-4.21972	1.05698	0.840676		-0.433567						-4.33649	1.16356	2.57712	-8.85431	2.13296	1.69628			-4.33649	1.16356	2.57712	-8.85431	2.13296	1.69628		0.512672		-1.47642	0.432678	0.740885
Q6Z382	10.2114	12.0811	10.2192	11.8049	12.6563	9.52736	3	3	6			1.52728	3.01623	1.30625	2.4635	2.75607	0.840266		1.98493						3.19195	6.29544	2.71898	5.16921	5.56166	1.69546			3.19195	6.29544	2.71898	5.16921	5.56166	1.69546		0.909222		0.0733197	0.0484744	0.966958
Q338N2	8.68408	11.422	11.7148	10.4539	11.6221	9.52669	3	3	6			-4.09209e-05	2.35713	2.80188	1.11245	1.72183	0.839601		1.47214						-8.55231e-05	4.91976	5.83217	2.33428	3.4746	1.69411			-8.55231e-05	4.91976	5.83217	2.33428	3.4746	1.69411		0.152669		-1.08295	0.745846	0.596318
Q6ZIF9	9.77793	9.0089	9.56546	11.2158	9.18802	9.52595	3	3	6			1.09381	-0.0559823	0.65254	1.87434	-0.712245	0.838857		0.615219						2.28601	-0.116846	1.35828	3.93296	-1.43729	1.69261			2.28601	-0.116846	1.35828	3.93296	-1.43729	1.69261		0.335856		0.220282	0.1463	0.903565
Q6Z6K4	9.91988	7.94433	5.37128	10.1307	10.5625	9.52341	3	3	6			1.23575	-1.12056	-3.54164	0.789262	0.662264	0.836311		-0.189768						2.58268	-2.33881	-7.37201	1.65612	1.33643	1.68748			2.58268	-2.33881	-7.37201	1.65612	1.33643	1.68748		0.0030418		3.93606	1.71679	0.304225
Q6NQK2	8.42013	7.94122	9.02735	11.2973	9.38048	9.52199	3	3	6			-0.263995	-1.12366	0.11443	1.95588	-0.519782	0.834899		0.166295						-0.551739	-2.3453	0.238188	4.10406	-1.0489	1.68463			-0.551739	-2.3453	0.238188	4.10406	-1.0489	1.68463		0.417319		2.46621	2.22089	0.214508
Q9LEV3	9.10365	9.68696	6.52932	9.67377	10.1161	9.52034	3	3	6			0.419532	0.622069	-2.3836	0.332331	0.215819	0.83325		0.00656632						0.876805	1.29837	-4.96152	0.697337	0.435516	1.6813			0.876805	1.29837	-4.96152	0.697337	0.435516	1.6813		0.0680893		1.86683	1.26847	0.4151
Q2QNS6	11.5354	9.71215	10.5245	11.7077	12.582	9.51983	3	3	6			2.8513	0.647262	1.61162	2.36627	2.68171	0.832739		1.83182						5.9591	1.35096	3.35462	4.96518	5.41161	1.68027			5.9591	1.35096	3.35462	4.96518	5.41161	1.68027		0.874966		0.464128	0.309321	0.807021
Q7X7K8	5.90212	9.42805	7.6844	10.8797	10.3848	9.51942	3	3	6			-2.782	0.363159	-1.22853	1.53822	0.484519	0.832326		-0.13205						-5.81428	0.757981	-2.5572	3.22768	0.977743	1.67944			-5.81428	0.757981	-2.5572	3.22768	0.977743	1.67944		0.218617		4.49945	3.49327	0.0888016
Q5JN63	8.98408	11.3092	10.1008	9.87112	11.1955	9.51791	3	3	6			0.299953	2.24436	1.18787	0.529683	1.29523	0.830812		1.06465						0.626891	4.6844	2.47258	1.11144	2.61373	1.67638			0.626891	4.6844	2.47258	1.11144	2.61373	1.67638		0.244865		-0.794106	0.835527	0.560378
Q7FMW4	9.27333	10.304	8.94477	10.9577	11.7302	9.51171	3	3	6			0.589206	1.23912	0.0318471	1.61625	1.82991	0.824619		1.02182						1.23142	2.58628	0.0662905	3.3914	3.69269	1.66389			1.23142	2.58628	0.0662905	3.3914	3.69269	1.66389		0.859431		1.62133	2.57383	0.167957
Q5NAI4	6.31653	9.09339	9.17722	8.59429	9.66834	9.51157	3	3	6			-2.3676	0.028504	0.264297	-0.74715	-0.23193	0.824481		-0.371566						-4.94819	0.0594933	0.550139	-1.56776	-0.468026	1.66361			-4.94819	0.0594933	0.550139	-1.56776	-0.468026	1.66361		0.451465		1.32213	0.878255	0.544025
Q43270	10.7302	10.8935	12.92	9.09748	9.96651	9.51076	3	3	6			2.04609	1.82857	4.00706	-0.243958	0.0662404	0.82367		1.42128						4.27625	3.81656	8.34077	-0.511902	0.133671	1.66197			4.27625	3.81656	8.34077	-0.511902	0.133671	1.66197		0.334757		-5.04995	4.93308	0.0327337
A0A1P8B590	11.3481	9.62044	10.577	9.14708	10.0855	9.51041	3	3	6			2.66394	0.555553	1.66403	-0.19436	0.185207	0.823314		0.949615						5.56753	1.15954	3.46372	-0.407828	0.373743	1.66125			5.56753	1.15954	3.46372	-0.407828	0.373743	1.66125		0.366769		-2.85454	3.14994	0.112661
Q6ENG3	10.2661	11.657	11.9481	10.7484	10.9112	9.50813	3	3	6			1.58196	2.59212	3.03522	1.40701	1.01098	0.821037		1.74139						3.30624	5.41024	6.31788	2.95235	2.04012	1.65666			3.30624	5.41024	6.31788	2.95235	2.04012	1.65666		0.313101		-2.79508	4.47048	0.0451076
Q9AXA6	11.7483	8.03672	8.9074	10.7339	6.86468	9.50813	3	3	6			3.0642	-1.02816	-0.00552201	1.39243	-3.03558	0.821037		0.201398						6.40405	-2.14597	-0.0114942	2.92175	-6.12571	1.65666			6.40405	-2.14597	-0.0114942	2.92175	-6.12571	1.65666		0.904108		-1.93129	0.644189	0.639853
B9FK36	10.7807	10.6406	11.0274	11.8444	12.1378	9.50766	3	3	6			2.09658	1.57572	2.11443	2.50299	2.23749	0.820562		1.8913						4.38177	3.28882	4.40123	5.25208	4.51519	1.6557			4.38177	3.28882	4.40123	5.25208	4.51519	1.6557		0.201974		-0.216285	0.21628	0.860782
Q9M199	12.4088	8.5205	9.44074	11.0176	10.6187	9.50702	3	3	6			3.72466	-0.544386	0.527821	1.67621	0.718396	0.819928		1.15377						7.78439	-1.13624	1.09867	3.51722	1.4497	1.65442			7.78439	-1.13624	1.09867	3.51722	1.4497	1.65442		0.113624		-0.375164	0.154535	0.898422
Q6Z8F5	11.4493	9.40497	7.62198	6.52466	8.97628	9.49947	3	3	6			2.76513	0.340084	-1.29094	-2.81678	-0.923987	0.812373		-0.185687						5.77901	0.709819	-2.68713	-5.9105	-1.86458	1.63918			5.77901	0.709819	-2.68713	-5.9105	-1.86458	1.63918		0.880403		-3.31253	1.43182	0.370663
Q5JL96	8.04685	8.62637	7.9002	8.47966	9.19921	9.49867	3	3	6			-0.637272	-0.438521	-1.01272	-0.861778	-0.701059	0.811576		-0.473296						-1.33187	-0.915276	-2.108	-1.80829	-1.41471	1.63757			-1.33187	-0.915276	-2.108	-1.80829	-1.41471	1.63757		0.18676		0.923239	1.10537	0.464783
Q9XG81	6.18303	5.37386	8.70373	4.55176	7.82864	9.49448	3	3	6			-2.50109	-3.69103	-0.209193	-4.78968	-2.07162	0.807382		-2.07587						-5.22719	-7.70387	-0.435439	-10.0503	-4.18046	1.6291			-5.22719	-7.70387	-0.435439	-10.0503	-4.18046	1.6291		0.571825		0.254958	0.0707933	0.952114
B8YEK4	9.67856	9.17707	10.0729	8.34731	11.3318	9.49446	3	3	6			0.994442	0.112184	1.16001	-0.994126	1.43155	0.807362		0.585237						2.07835	0.234148	2.41459	-2.08599	2.88882	1.62906			2.07835	0.234148	2.41459	-2.08599	2.88882	1.62906		0.341631		-0.765066	0.588342	0.665107
Q7XIV8	10.03	8.63583	7.67462	8.42597	8.33753	9.49223	3	3	6			1.34585	-0.42906	-1.23831	-0.915466	-1.56273	0.80514		-0.332429						2.81278	-0.895529	-2.57756	-1.92094	-3.15354	1.62458			2.81278	-0.895529	-2.57756	-1.92094	-3.15354	1.62458		0.894423		-0.929865	0.542573	0.686545
Q851R5	6.09605	8.98265	9.26409	11.0451	11.6796	9.49003	3	3	6			-2.58807	-0.0822357	0.351167	1.70364	1.7793	0.802935		0.327789						-5.40897	-0.171641	0.730962	3.57478	3.59058	1.62013			-5.40897	-0.171641	0.730962	3.57478	3.59058	1.62013		0.209203		4.54505	3.50734	0.0879395
Q5N8Q3	7.55865	9.68851	4.08483	11.1171	9.53199	9.48609	3	3	6			-1.12547	0.623625	-4.82809	1.77569	-0.368279	0.798997		-0.52059						-2.3522	1.30162	-10.0498	3.72596	-0.743176	1.61219			-2.3522	1.30162	-10.0498	3.72596	-0.743176	1.61219		0.259143		5.23177	2.19546	0.218324
Q0JHF8	8.3142	2.4982	6.37302	10.6948	4.16559	9.48478	3	3	6			-0.369925	-6.56669	-2.5399	1.35336	-5.73467	0.797689		-2.17669						-0.77313	-13.7059	-5.28686	2.83977	-11.5724	1.60955			-0.77313	-13.7059	-5.28686	2.83977	-11.5724	1.60955		0.80596		4.21428	0.945704	0.519176
A3ABE1	8.22246	7.9655	8.75104	10.969	11.6473	9.48456	3	3	6			-0.461666	-1.09939	-0.161882	1.62759	1.74706	0.797467		0.408196						-0.964865	-2.29464	-0.33696	3.4152	3.52551	1.6091			-0.964865	-2.29464	-0.33696	3.4152	3.52551	1.6091		0.92646		4.04876	6.82686	0.0088087
Q943K1	10.0428	10.1025	10.765	11.8942	12.4082	9.48174	3	3	6			1.35863	1.03761	1.85211	2.55281	2.50793	0.794645		1.68396						2.83949	2.16569	3.85521	5.35662	5.06093	1.6034			2.83949	2.16569	3.85521	5.35662	5.06093	1.6034		0.284895		1.05352	1.10935	0.463502
Q43011	9.58218	9.22224	9.5515	10.6801	10.4454	9.48085	3	3	6			0.898056	0.157352	0.638573	1.33866	0.545164	0.793757		0.728594						1.8769	0.328424	1.3292	2.80893	1.10012	1.60161			1.8769	0.328424	1.3292	2.80893	1.10012	1.60161		0.888356		0.658712	1.36703	0.387688
O56044	7.90533	10.3517	11.589	11.3205	12.4318	9.47901	3	3	6			-0.778796	1.28683	2.67607	1.97902	2.53152	0.791918		1.41443						-1.62765	2.68585	5.5703	4.15263	5.10852	1.5979			-1.62765	2.68585	5.5703	4.15263	5.10852	1.5979		0.401309		1.41019	0.788029	0.579135
Q0J7U6	10.7827	9.31275	10.5598	11.2293	10.9854	9.47433	3	3	6			2.09855	0.24786	1.64684	1.88786	1.08515	0.787241		1.29225						4.38588	0.51733	3.42792	3.96134	2.1898	1.58846			4.38588	0.51733	3.42792	3.96134	2.1898	1.58846		0.545341		-0.197179	0.164813	0.892044
Q6Z5N4	7.51916	8.35412	8.87366	7.77827	9.60168	9.47098	3	3	6			-1.16496	-0.71077	-0.039264	-1.56316	-0.298587	0.78389		-0.498809						-2.43472	-1.48351	-0.0817289	-3.28002	-0.602539	1.5817			-2.43472	-1.48351	-0.0817289	-3.28002	-0.602539	1.5817		0.382259		0.56637	0.443316	0.735442
Q9FU53	9.91688	9.6252	12.2831	8.94863	12.5848	9.46905	3	3	6			1.23276	0.56031	3.37022	-0.392807	2.68458	0.781958		1.37284						2.57641	1.16947	7.01519	-0.824235	5.4174	1.5778			2.57641	1.16947	7.01519	-0.824235	5.4174	1.5778		0.968649		-1.53004	0.790507	0.578141
Q2QM62	9.17245	10.8009	9.74942	11.1132	11.5836	9.46504	3	3	6			0.488329	1.73601	0.836493	1.77172	1.68338	0.777942		1.21565						1.02059	3.62338	1.74118	3.71763	3.39701	1.5697			1.02059	3.62338	1.74118	3.71763	3.39701	1.5697		0.852793		0.766397	1.01161	0.495993
F7J0N2	9.94885	11.6453	9.27924	12.0135	13.8304	9.46211	3	3	6			1.26473	2.58037	0.366316	2.67203	3.93015	0.77502		1.93143						2.64323	5.38571	0.762494	5.60676	7.93092	1.56381			2.64323	5.38571	0.762494	5.60676	7.93092	1.56381		0.684809		2.10335	1.28255	0.41107
Q7XYS3	8.49374	12.4379	8.65746	11.5568	10.1518	9.45933	3	3	6			-0.190388	3.37305	-0.255462	2.2154	0.251513	0.772235		1.02772						-0.397903	7.04018	-0.53175	4.64863	0.507544	1.55819			-0.397903	7.04018	-0.53175	4.64863	0.507544	1.55819		0.39583		0.201276	0.0800534	0.946023
A2ZRG4	9.34722	9.31057	8.85941	9.9364	10.6187	9.45925	3	3	6			0.663099	0.24568	-0.0535129	0.594965	0.718396	0.772153		0.49013						1.38585	0.512781	-0.111388	1.24843	1.4497	1.55802			1.38585	0.512781	-0.111388	1.24843	1.4497	1.55802		0.0836291		0.822968	2.86624	0.137144
C7IW64	11.7081	10.831	10.8049	10.4103	9.45773	9.45822	3	3	6			3.02401	1.7661	1.89193	1.06891	-0.442535	0.771128		1.34659						6.32007	3.68619	3.9381	2.24291	-0.893022	1.55595			6.32007	3.68619	3.9381	2.24291	-0.893022	1.55595		0.874771		-3.67951	4.50243	0.0441199
Q6AU90	10.4383	10.2825	11.6975	11.0858	11.4786	9.45736	3	3	6			1.75415	1.21762	2.78457	1.74437	1.57835	0.770266		1.64155						3.6661	2.54141	5.79613	3.66024	3.18506	1.55421			3.6661	2.54141	5.79613	3.66024	3.18506	1.55421		0.617373		-1.20137	1.49677	0.354345
Q5JMH0	9.2965	9.752	10.4245	10.1823	10.9527	9.45728	3	3	6			0.61238	0.687109	1.51156	0.840833	1.0524	0.770184		0.912411						1.27985	1.43413	3.14634	1.76434	2.12372	1.55405			1.27985	1.43413	3.14634	1.76434	2.12372	1.55405		0.143545		-0.139405	0.263041	0.83333
P43279	8.10219	10.1587	10.8091	9.66434	10.4325	9.45677	3	3	6			-0.581938	1.09385	1.8962	0.322903	0.532277	0.769671		0.672161						-1.21623	2.28307	3.94698	0.677554	1.07412	1.55301			-1.21623	2.28307	3.94698	0.677554	1.07412	1.55301		0.0538479		-0.569713	0.452873	0.730586
Q8S983	10.4611	8.54264	10.3108	10.0678	13.3001	9.45393	3	3	6			1.77695	-0.522242	1.39792	0.7264	3.3998	0.766835		1.25761						3.71375	-1.09002	2.90979	1.52422	6.86069	1.54729			3.71375	-1.09002	2.90979	1.52422	6.86069	1.54729		0.823817		1.46622	0.834344	0.560838
Q7XWK5	5.57549	8.93266	6.33235	9.68529	7.79377	9.45284	3	3	6			-3.10863	-0.132229	-2.58057	0.343855	-2.1065	0.765744		-1.13639						-6.49692	-0.275988	-5.37152	0.721517	-4.25085	1.54509			-6.49692	-0.275988	-5.37152	0.721517	-4.25085	1.54509		0.944485		3.38673	1.89981	0.267979
Q7XV21	9.65635	8.47731	8.4258	8.63543	10.1965	9.45216	3	3	6			0.97223	-0.587574	-0.48712	-0.706009	0.296214	0.765065		0.0421343						2.03192	-1.22638	-1.01395	-1.48143	0.597751	1.54372			2.03192	-1.22638	-1.01395	-1.48143	0.597751	1.54372		0.837661		0.28948	0.244404	0.844165
P30298	9.09402	11.3085	8.23443	8.80623	11.0086	9.45173	3	3	6			0.409902	2.24357	-0.678489	-0.53521	1.10837	0.764632		0.552129						0.856679	4.68274	-1.41229	-1.12304	2.23666	1.54285			0.856679	4.68274	-1.41229	-1.12304	2.23666	1.54285		0.497965		-0.490222	0.281129	0.822947
Q6H6Q7	5.32481	7.26885	9.46693	3.26227	6.199	9.45164	3	3	6			-3.35931	-1.79604	0.554009	-6.07917	-3.70126	0.76455		-2.26954						-7.02083	-3.74868	1.15318	-12.756	-7.46902	1.54268			-7.02083	-3.74868	1.15318	-12.756	-7.46902	1.54268		0.4892		-3.02202	0.827934	0.563336
Q40704	9.19495	9.60138	11.5576	11.0027	9.57901	9.45111	3	3	6			0.510831	0.536494	2.64468	1.66131	-0.321251	0.764014		0.966013						1.06762	1.11976	5.50497	3.48595	-0.648274	1.5416			1.06762	1.11976	5.50497	3.48595	-0.648274	1.5416		0.794786		-1.10436	0.758314	0.591187
O22798	5.60978	10.0492	10.9355	8.91079	10.1688	9.44309	3	3	6			-3.07434	0.984281	2.02254	-0.430645	0.268532	0.755995		0.0877268						-6.42525	2.05438	4.20995	-0.90363	0.54189	1.52542			-6.42525	2.05438	4.20995	-0.90363	0.54189	1.52542		0.0901957		0.441532	0.150922	0.900675
A3BH85	10.5319	9.69898	9.4483	10.7493	10.1259	9.44286	3	3	6			1.84775	0.634095	0.535379	1.40785	0.225665	0.755767		0.901083						3.86172	1.32348	1.1144	2.95411	0.455385	1.52496			3.86172	1.32348	1.1144	2.95411	0.455385	1.52496		0.803785		-0.455048	0.492933	0.710579
Q0DGP6	10.6937	11.1082	9.86597	9.65333	10.1851	9.44247	3	3	6			2.00963	2.04331	0.953042	0.311892	0.284858	0.755373		1.05968						4.20004	4.26477	1.98378	0.654448	0.574835	1.52416			4.20004	4.26477	1.98378	0.654448	0.574835	1.52416		0.282437		-2.56505	4.88483	0.0338469
Q94CU5	10.0696	12.4588	10.1734	10.7395	12.0175	9.44216	3	3	6			1.38546	3.3939	1.2605	1.39809	2.11724	0.755062		1.71838						2.89556	7.08372	2.62377	2.93364	4.27252	1.52353			2.89556	7.08372	2.62377	2.93364	4.27252	1.52353		0.464254		-1.29112	1.06801	0.476977
Q7X7H4	10.7448	11.1411	9.57611	11.2863	12.1019	9.44207	3	3	6			2.06071	2.07626	0.663183	1.94489	2.20161	0.754979		1.61694						4.30681	4.33355	1.38043	4.081	4.44278	1.52337			4.30681	4.33355	1.38043	4.081	4.44278	1.52337		0.935655		0.00878807	0.00709605	0.995093
Q84YJ9	9.55363	11.2551	10.2264	5.70992	11.4035	9.43948	3	3	6			0.869506	2.19026	1.31349	-3.63151	1.50323	0.752384		0.499559						1.81723	4.57148	2.73405	-7.62007	3.03346	1.51813			1.81723	4.57148	2.73405	-7.62007	3.03346	1.51813		0.111818		-4.06375	1.732	0.301034
Q7XHL3	9.13052	10.1283	8.38797	6.49112	9.57888	9.43896	3	3	6			0.446396	1.06337	-0.524949	-2.85032	-0.321383	0.751864		-0.239171						0.93295	2.21944	-1.09269	-5.98089	-0.64854	1.51708			0.93295	2.21944	-1.09269	-5.98089	-0.64854	1.51708		0.315419		-2.39068	1.39416	0.380467
Q0DXS3	9.79565	9.25557	8.61261	11.4762	8.22299	9.43244	3	3	6			1.11153	0.190684	-0.300313	2.1348	-1.67728	0.745343		0.367461						2.32305	0.397994	-0.625108	4.4795	-3.38469	1.50393			2.32305	0.397994	-0.625108	4.4795	-3.38469	1.50393		0.248869		0.1676	0.0759102	0.948743
A3BXL8	9.38414	7.96919	10.1999	9.43329	8.87197	9.43104	3	3	6			0.700013	-1.0957	1.28699	0.0918561	-1.0283	0.743944		0.116468						1.463	-2.28694	2.67891	0.192743	-2.07507	1.5011			1.463	-2.28694	2.67891	0.192743	-2.07507	1.5011		0.656502		-0.745399	0.507124	0.703624
Q6F303	6.6768	7.67101	7.95472	6.04006	10.9341	9.43081	3	3	6			-2.00732	-1.39388	-0.958204	-3.30138	1.03379	0.743714		-0.980545						-4.19522	-2.90928	-1.99452	-6.92734	2.08616	1.50064			-4.19522	-2.90928	-1.99452	-6.92734	2.08616	1.50064		0.0916972		1.91949	0.850241	0.554692
Q83034	9.27179	9.86549	9.1703	11.1875	10.9676	9.42823	3	3	6			0.587667	0.800599	0.257377	1.8461	1.06732	0.741141		0.883367						1.2282	1.671	0.535736	3.87371	2.15382	1.49545			1.2282	1.671	0.535736	3.87371	2.15382	1.49545		0.356775		1.36268	2.67635	0.156436
Q651V6	9.6779	8.75482	9.8445	8.10575	10.2685	9.42735	3	3	6			0.993773	-0.310066	0.931578	-1.23569	0.368277	0.740261		0.248023						2.07695	-0.647167	1.9391	-2.59286	0.743171	1.49367			2.07695	-0.647167	1.9391	-2.59286	0.743171	1.49367		0.66455		-1.24163	1.10631	0.46448
Q84S11	8.8775	10.3224	10.9176	11.0831	11.6397	9.42647	3	3	6			0.193376	1.25749	2.00467	1.74164	1.73939	0.73938		1.27933						0.404148	2.62462	4.17277	3.65452	3.51004	1.49189			0.404148	2.62462	4.17277	3.65452	3.51004	1.49189		0.578917		0.484973	0.458924	0.727529
Q53Q11	2.8791	9.8906	9.17465	9.21616	9.34625	9.42461	3	3	6			-5.80503	0.825712	0.261728	-0.125273	-0.554017	0.737513		-0.776561						-12.1323	1.72342	0.544792	-0.262864	-1.11799	1.48813			-12.1323	1.72342	0.544792	-0.262864	-1.11799	1.48813		0.0580752		3.32378	0.996474	0.501224
P0C0M2	10.6773	9.24163	10.8504	9.61853	10.5084	9.4224	3	3	6			1.99316	0.176739	1.9375	0.277095	0.608124	0.735307		0.954653						4.16562	0.368887	4.03294	0.581434	1.22717	1.48368			4.16562	0.368887	4.03294	0.581434	1.22717	1.48368		0.0889601		-1.75839	2.06349	0.239237
A2XLM6	7.24222	10.9389	10.9156	8.83961	10.2643	9.42036	3	3	6			-1.4419	1.87403	2.00266	-0.501824	0.36406	0.733266		0.505048						-3.01352	3.91145	4.16857	-1.05299	0.734662	1.47956			-3.01352	3.91145	4.16857	-1.05299	0.734662	1.47956		0.185196		-1.30176	0.675819	0.625977
Q6K5K2	11.0277	10.469	10.7001	10.9157	11.8673	9.41739	3	3	6			2.34358	1.40414	1.78717	1.57422	1.96701	0.730294		1.6344						4.89798	2.93071	3.72003	3.30321	3.96937	1.47356			4.89798	2.93071	3.72003	3.30321	3.96937	1.47356		0.739661		-0.934195	1.40923	0.376512
Q653S3	9.62293	10.5676	9.75956	9.79142	10.1436	9.41215	3	3	6			0.938807	1.50269	0.846632	0.449986	0.243373	0.725052		0.784423						1.96207	3.13639	1.76228	0.944215	0.491119	1.46298			1.96207	3.13639	1.76228	0.944215	0.491119	1.46298		0.600472		-1.32081	4.02377	0.0614788
Q2RBP2	12.2004	9.65111	11.349	11.3502	11.7713	9.41043	3	3	6			3.51632	0.586218	2.43608	2.00878	1.87102	0.723336		1.85696						7.34897	1.22355	5.07075	4.21507	3.77565	1.45952			7.34897	1.22355	5.07075	4.21507	3.77565	1.45952		0.372209		-1.39767	0.94491	0.519462
Q2QLI6	9.99322	10.9076	10.3588	11.9718	12.7418	9.40914	3	3	6			1.3091	1.84275	1.44584	2.63032	2.84152	0.722042		1.7986						2.73597	3.84618	3.00954	5.51926	5.73409	1.45691			2.73597	3.84618	3.00954	5.51926	5.73409	1.45691		0.108947		1.03952	0.9778	0.507753
B8BHF1	7.91713	8.94644	9.68233	7.98527	10.0881	9.4082	3	3	6			-0.76699	-0.118449	0.769404	-1.35616	0.187861	0.721108		-0.0938717						-1.60298	-0.247225	1.60153	-2.84567	0.379097	1.45503			-1.60298	-0.247225	1.60153	-2.84567	0.379097	1.45503		0.68125		-0.25429	0.183147	0.88078
P14717	10.2219	11.0833	11.4354	10.5562	12.3184	9.40335	3	3	6			1.53783	2.01846	2.52249	1.21478	2.41811	0.716259		1.73799						3.214	4.2129	5.25061	2.549	4.87966	1.44524			3.214	4.2129	5.25061	2.549	4.87966	1.44524		0.504494		-1.26787	1.55761	0.339713
Q6ZF89	7.08672	9.30838	8.31311	8.28586	2.34897	9.40169	3	3	6			-1.5974	0.243497	-0.599814	-1.05557	-7.5513	0.714596		-1.641						-3.33851	0.508225	-1.24852	-2.21493	-15.2383	1.44189			-3.33851	0.508225	-1.24852	-2.21493	-15.2383	1.44189		0.0920517		-3.9775	1.04218	0.485593
F4JFJ3	9.21534	10.4532	10.2321	9.81905	11.9414	9.40084	3	3	6			0.531216	1.38828	1.31914	0.477608	2.04115	0.713743		1.07852						1.11022	2.8976	2.74581	1.00217	4.11897	1.44016			1.11022	2.8976	2.74581	1.00217	4.11897	1.44016		0.512982		-0.0641082	0.0627	0.957471
Q6ZKC0	10.9067	9.12368	9.14456	12.6064	12.7853	9.40047	3	3	6			2.22262	0.0587946	0.231633	3.26492	2.885	0.71338		1.56272						4.64518	0.122715	0.482149	6.85085	5.82184	1.43943			4.64518	0.122715	0.482149	6.85085	5.82184	1.43943		0.866968		2.95402	1.99271	0.251266
B7F7B9	10.0381	8.03694	8.46932	11.9958	10.3144	9.40015	3	3	6			1.35397	-1.02794	-0.443607	2.6544	0.414092	0.71306		0.610662						2.82975	-2.14551	-0.923378	5.56978	0.835623	1.43878			2.82975	-2.14551	-0.923378	5.56978	0.835623	1.43878		0.993867		2.69444	1.88475	0.27079
Q6ZF86	8.39081	7.22178	10.2831	11.3094	8.90971	9.39825	3	3	6			-0.293309	-1.84311	1.37016	1.96798	-0.990552	0.711158		0.153723						-0.613005	-3.84691	2.85203	4.12946	-1.9989	1.43495			-0.613005	-3.84691	2.85203	4.12946	-1.9989	1.43495		0.913417		1.72446	0.870466	0.54697
Q762B4	8.60262	10.5231	9.09373	9.91181	10.4951	9.39729	3	3	6			-0.0814986	1.45818	0.180811	0.570374	0.594791	0.710196		0.572143						-0.170329	3.04351	0.376362	1.19683	1.20027	1.43301			-0.170329	3.04351	0.376362	1.19683	1.20027	1.43301		0.0123195		0.193521	0.211439	0.863675
Q8H569	9.04535	10.6179	8.93245	10.6463	9.53352	9.39708	3	3	6			0.361227	1.55304	0.0195275	1.30485	-0.366741	0.709982		0.596981						0.75495	3.24149	0.040647	2.738	-0.740071	1.43257			0.75495	3.24149	0.040647	2.738	-0.740071	1.43257		0.955358		-0.202195	0.164203	0.892421
Q653T6	10.623	7.82782	7.86047	10.4204	9.49053	9.39633	3	3	6			1.93884	-1.23707	-1.05246	1.07894	-0.409735	0.709232		0.171293						4.05211	-2.58199	-2.19071	2.26397	-0.826832	1.43106			4.05211	-2.58199	-2.19071	2.26397	-0.826832	1.43106		0.311628		1.19627	0.652927	0.635989
Q6AWY8	6.62248	8.72891	8.23979	10.6443	10.0289	9.39425	3	3	6			-2.06165	-0.33598	-0.673134	1.30287	0.128608	0.707154		-0.155355						-4.30876	-0.701254	-1.40114	2.73384	0.259527	1.42687			-4.30876	-0.701254	-1.40114	2.73384	0.259527	1.42687		0.590221		3.61046	4.27463	0.0516664
Q8GZ87	10.2929	8.25635	10.8044	12.4891	10.6163	9.39253	3	3	6			1.60877	-0.808537	1.89145	3.14763	0.716008	0.705438		1.21013						3.36228	-1.68757	3.93709	6.60474	1.44488	1.42341			3.36228	-1.68757	3.93709	6.60474	1.44488	1.42341		0.963968		1.28708	0.663123	0.63151
Q9ZV43	8.51519	11.6263	8.12091	12.0674	10.2144	9.38793	3	3	6			-0.168936	2.56142	-0.792012	2.72596	0.314176	0.700837		0.890241						-0.35307	5.34615	-1.64859	5.71994	0.633996	1.41412			-0.35307	5.34615	-1.64859	5.71994	0.633996	1.41412		0.70281		1.47452	0.713394	0.609884
Q0JKD0	9.17717	11.2809	11.507	11.4839	11.3547	9.38752	3	3	6			0.493047	2.216	2.59408	2.14243	1.45448	0.700428		1.60008						1.03045	4.62521	5.39963	4.4955	2.93509	1.4133			1.03045	4.62521	5.39963	4.4955	2.93509	1.4133		0.608193		-0.737132	0.574559	0.671491
Q10MI0	9.97671	8.80616	11.0793	10.1625	10.1369	9.38608	3	3	6			1.29258	-0.258724	2.16636	0.82108	0.236598	0.698984		0.826147						2.70145	-0.540006	4.50933	1.72289	0.477447	1.41038			2.70145	-0.540006	4.50933	1.72289	0.477447	1.41038		0.120561		-1.02002	0.889294	0.539878
Q5Z620	6.18917	10.7624	9.2866	9.55267	9.64539	9.38524	3	3	6			-2.49495	1.69749	0.37368	0.211232	-0.254877	0.698143		0.0384537						-5.21435	3.54299	0.777824	0.443232	-0.514333	1.40869			-5.21435	3.54299	0.777824	0.443232	-0.514333	1.40869		0.0881949		0.743708	0.335678	0.792411
Q10Q07	9.83336	10.8833	10.2818	12.659	13.0558	9.38392	3	3	6			1.14924	1.81837	1.36889	3.3176	3.15551	0.696826		1.91774						2.40187	3.79527	2.84937	6.96138	6.36771	1.40603			2.40187	3.79527	2.84937	6.96138	6.36771	1.40603		0.103163		1.8962	1.49992	0.353572
O92604	9.24949	9.73949	9.06164	11.6387	12.2496	9.38312	3	3	6			0.565369	0.674607	0.148718	2.29727	2.34929	0.696027		1.12188						1.1816	1.40803	0.309559	4.82041	4.7408	1.40442			1.1816	1.40803	0.309559	4.82041	4.7408	1.40442		0.162607		2.68881	3.57521	0.0838984
Q2QLY5	11.31	10.8183	10.4711	10.4056	12.0988	9.37471	3	3	6			2.62586	1.75346	1.55814	1.06413	2.19852	0.687619		1.64796						5.48796	3.65979	3.24331	2.23288	4.43655	1.38745			5.48796	3.65979	3.24331	2.23288	4.43655	1.38745		0.730434		-1.44472	1.86744	0.27406
O56043	9.21216	9.33593	11.5759	11.5422	11.3615	9.37443	3	3	6			0.528033	0.271039	2.66295	2.20072	1.46119	0.687337		1.30188						1.10357	0.56571	5.54298	4.61782	2.94862	1.38688			1.10357	0.56571	5.54298	4.61782	2.94862	1.38688		0.518382		0.580357	0.382154	0.767291
Q7XEZ4	8.03039	7.94134	8.76308	9.016	9.17343	9.37387	3	3	6			-0.653732	-1.12355	-0.149844	-0.325437	-0.726838	0.686772		-0.382104						-1.36627	-2.34505	-0.311903	-0.68287	-1.46673	1.38574			-1.36627	-2.34505	-0.311903	-0.68287	-1.46673	1.38574		0.645057		1.08646	1.50412	0.352545
Q9XHL5	5.65223	9.72948	6.39678	6.21416	11.8473	9.37367	3	3	6			-3.03189	0.664598	-2.51615	-3.12727	1.94703	0.686576		-0.896186						-6.33654	1.38714	-5.23741	-6.56202	3.92904	1.38535			-6.33654	1.38714	-5.23741	-6.56202	3.92904	1.38535		0.736518		2.97973	1.01395	0.495188
Q651A1	9.42293	10.1657	9.31336	9.59526	9.17537	9.3711	3	3	6			0.738804	1.10077	0.400436	0.25382	-0.72489	0.684007		0.408825						1.54407	2.29752	0.833516	0.532596	-1.4628	1.38016			1.54407	2.29752	0.833516	0.532596	-1.4628	1.38016		0.402027		-1.40838	2.25493	0.209506
Q2QMH1	10.9481	7.79097	10.6022	9.80126	10.1126	9.36859	3	3	6			2.26402	-1.27392	1.68931	0.459818	0.212305	0.6815		0.672173						4.73173	-2.65891	3.51634	0.964846	0.428424	1.3751			4.73173	-2.65891	3.51634	0.964846	0.428424	1.3751		0.0282946		-0.94026	0.470307	0.721811
Q0J7T6	10.0849	9.77403	10.7822	10.4867	11.6636	9.36853	3	3	6			1.40082	0.709142	1.86926	1.1453	1.76334	0.681434		1.26155						2.92766	1.48011	3.8909	2.4032	3.55836	1.37497			2.92766	1.48011	3.8909	2.4032	3.55836	1.37497		0.895193		-0.320711	0.413501	0.750799
Q69V10	8.36234	8.78624	8.47513	8.84778	8.69153	9.36783	3	3	6			-0.321785	-0.27865	-0.437798	-0.493659	-1.20873	0.680736		-0.343315						-0.672518	-0.581595	-0.911286	-1.03586	-2.43918	1.37356			-0.672518	-0.581595	-0.911286	-1.03586	-2.43918	1.37356		0.0154742		0.0213091	0.0196145	0.986496
Q84UI6	8.58331	11.9239	9.98442	12.0258	11.0296	9.36494	3	3	6			-0.100815	2.85903	1.07149	2.68433	1.1293	0.67785		1.38686						-0.210699	5.96734	2.23034	5.63257	2.27889	1.36774			-0.210699	5.96734	2.23034	5.63257	2.27889	1.36774		0.685079		0.430739	0.225453	0.855327
Q5JMM1	10.181	11.5967	9.10439	10.992	10.5877	9.36361	3	3	6			1.4969	2.53186	0.191466	1.65058	0.687419	0.676515		1.20579						3.12847	5.28447	0.39854	3.46345	1.38719	1.36505			3.12847	5.28447	0.39854	3.46345	1.38719	1.36505		0.390022		-0.865268	0.708121	0.612117
Q9FJR0	10.2627	8.2268	9.49997	11.0355	10.4856	9.36361	3	3	6			1.57856	-0.83809	0.587042	1.69405	0.585363	0.676515		0.713906						3.29913	-1.74925	1.22194	3.55466	1.18124	1.36505			3.29913	-1.74925	1.22194	3.55466	1.18124	1.36505		0.426207		1.10971	0.893195	0.53842
Q9FYN7	5.57915	6.61219	9.69035	6.38408	10.5309	9.35946	3	3	6			-3.10497	-2.4527	0.777424	-2.95735	0.630629	0.67237		-1.07243						-6.48928	-5.11924	1.61822	-6.20547	1.27259	1.35668			-6.48928	-5.11924	1.61822	-6.20547	1.27259	1.35668		0.999502		2.13803	0.78864	0.57889
Q0DEC8	9.16541	7.43688	6.51609	7.79909	7.47946	9.3594	3	3	6			0.481286	-1.62801	-2.39683	-1.54235	-2.42081	0.672304		-1.13907						1.00587	-3.39796	-4.98905	-3.23634	-4.88511	1.35655			1.00587	-3.39796	-4.98905	-3.23634	-4.88511	1.35655		0.959323		0.205412	0.0883951	0.940568
Q0DIV0	5.01632	9.26728	2.7978	10.9149	10.4138	9.35612	3	3	6			-3.66781	0.202391	-6.11512	1.57347	0.513574	0.669028		-1.13741						-7.66557	0.422428	-12.7288	3.30164	1.03638	1.34994			-7.66557	0.422428	-12.7288	3.30164	1.03638	1.34994		0.0662085		8.55329	3.42576	0.0930561
Q10SU5	11.2797	7.98185	11.2341	10.7117	8.67804	9.35608	3	3	6			2.59555	-1.08303	2.32118	1.37023	-1.22223	0.668984		0.775112						5.42459	-2.2605	4.83158	2.87518	-2.46642	1.34985			5.42459	-2.2605	4.83158	2.87518	-2.46642	1.34985		0.585603		-2.07902	0.949199	0.51792
Q84T08	9.2559	5.61539	8.73522	8.7897	5.72389	9.34769	3	3	6			0.571779	-3.4495	-0.177706	-0.551741	-4.17638	0.660594		-1.18716						1.195	-7.19976	-0.369899	-1.15773	-8.4278	1.33292			1.195	-7.19976	-0.369899	-1.15773	-8.4278	1.33292		0.873086		-0.625982	0.183956	0.880286
Q8RY60	7.44964	11.1238	8.61136	8.94822	9.65284	9.34651	3	3	6			-1.23448	2.05891	-0.301567	-0.393216	-0.24742	0.65942		0.0902748						-2.58001	4.29733	-0.627717	-0.825093	-0.499286	1.33055			-2.58001	4.29733	-0.627717	-0.825093	-0.499286	1.33055		0.194119		-0.361143	0.192729	0.874949
Q0J952	10.5088	9.50327	9.01329	10.2256	10.8611	9.34625	3	3	6			1.82466	0.438382	0.100371	0.884132	0.960822	0.659154		0.811254						3.81347	0.914986	0.208925	1.85519	1.93891	1.33002			3.81347	0.914986	0.208925	1.85519	1.93891	1.33002		0.0579761		0.0622432	0.0614273	0.958316
Q84L14	9.51003	12.6171	9.42002	10.8275	11.8128	9.34598	3	3	6			0.825909	3.55221	0.5071	1.48606	1.91251	0.658888		1.49045						1.72612	7.41414	1.05554	3.11824	3.85939	1.32948			1.72612	7.41414	1.05554	3.11824	3.85939	1.32948		0.243437		-0.629562	0.350253	0.784446
A2YXJ7	11.8403	9.98897	10.5133	10.9992	12.3008	9.34379	3	3	6			3.15622	0.924082	1.60041	1.65772	2.40057	0.656691		1.73262						6.59638	1.92873	3.33129	3.47842	4.84428	1.32505			6.59638	1.92873	3.33129	3.47842	4.84428	1.32505		0.708693		-0.736218	0.53365	0.690805
Q84Q83	8.90457	7.47792	6.25529	10.5327	11.2875	9.34305	3	3	6			0.220451	-1.58697	-2.65763	1.19131	1.38722	0.655958		-0.131611						0.460734	-3.3123	-5.53191	2.49975	2.79936	1.32357			0.460734	-3.3123	-5.53191	2.49975	2.79936	1.32357		0.124345		5.00205	4.31139	0.0503667
Q69VG1	9.25512	11.546	9.25739	9.28068	10.5016	9.34167	3	3	6			0.571	2.48109	0.344464	-0.0607592	0.601373	0.65458		0.765292						1.19337	5.1785	0.71701	-0.127492	1.21355	1.32079			1.19337	5.1785	0.71701	-0.127492	1.21355	1.32079		0.195759		-1.56068	1.49902	0.353795
Q2RAV0	9.94078	10.2937	7.77367	9.43306	10.9157	9.34145	3	3	6			1.25666	1.22881	-1.13926	0.0916266	1.01539	0.654358		0.517932						2.62637	2.56477	-2.37139	0.192262	2.04902	1.32034			2.62637	2.56477	-2.37139	0.192262	2.04902	1.32034		0.192355		0.247291	0.16173	0.893953
Q6Z0D2	7.97085	8.75449	10.3271	10.4086	13.1443	9.34034	3	3	6			-0.71327	-0.3104	1.41418	1.06721	3.24403	0.653246		0.892499						-1.49071	-0.647864	2.94365	2.23935	6.54634	1.31809			-1.49071	-0.647864	2.94365	2.23935	6.54634	1.31809		0.831755		3.09957	2.21453	0.215456
Q6Z351	10.9549	9.65646	10.7932	12.197	9.61351	9.33172	3	3	6			2.27073	0.591574	1.88027	2.8556	-0.286752	0.644629		1.32601						4.74573	1.23473	3.91383	5.99195	-0.578656	1.30071			4.74573	1.23473	3.91383	5.99195	-0.578656	1.30071		0.454324		-1.06009	0.603267	0.658262
Q67W50	10.9588	10.2073	8.54411	9.90692	9.08068	9.32829	3	3	6			2.27465	1.14237	-0.368809	0.565483	-0.819581	0.641199		0.572552						4.75393	2.38434	-0.767684	1.18656	-1.65389	1.29379			4.75393	2.38434	-0.767684	1.18656	-1.65389	1.29379		0.533969		-1.84804	1.40162	0.378503
Q0DHL4	10.4268	9.30768	7.17592	9.45271	11.556	9.32773	3	3	6			1.74267	0.242792	-1.737	0.111278	1.65571	0.640638		0.442681						3.6421	0.506752	-3.6156	0.233496	3.34118	1.29266			3.6421	0.506752	-3.6156	0.233496	3.34118	1.29266		0.317037		1.44469	0.829984	0.562535
Q96282	7.72349	9.70008	7.65843	12.6524	11.0869	9.32679	3	3	6			-0.960633	0.635188	-1.2545	3.31091	1.1866	0.639695		0.592878						-2.00769	1.32576	-2.61126	6.94736	2.39452	1.29075			-2.00769	1.32576	-2.61126	6.94736	2.39452	1.29075		0.666739		4.64194	3.41482	0.093764
B6DMK2	10.6915	11.2298	8.62527	10.2593	14.3482	9.32665	3	3	6			2.00736	2.16495	-0.287653	0.917835	4.44791	0.63956		1.64833						4.1953	4.51866	-0.598756	1.92591	8.97574	1.29048			4.1953	4.51866	-0.598756	1.92591	8.97574	1.29048		0.621999		1.35897	0.576267	0.670697
Q7Y001	10.3407	10.2621	10.5197	8.86932	11.1232	9.32501	3	3	6			1.65662	1.19721	1.60681	-0.472121	1.22295	0.637919		0.974897						3.46227	2.4988	3.34461	-0.990661	2.46788	1.28717			3.46227	2.4988	3.34461	-0.990661	2.46788	1.28717		0.164098		-2.18043	3.20191	0.108675
Q6YZZ7	5.88051	4.2474	6.56715	7.16972	10.6448	9.32168	3	3	6			-2.80361	-4.81749	-2.34577	-2.17171	0.744493	0.634586		-1.79325						-5.85944	-10.055	-4.88278	-4.55695	1.50236	1.28044			-5.85944	-10.055	-4.88278	-4.55695	1.50236	1.28044		0.780187		6.34103	3.89896	0.0670342
Q8S1Z1	9.3981	7.99605	11.1992	10.3957	9.50297	9.32096	3	3	6			0.713979	-1.06884	2.28626	1.05431	-0.397294	0.633864		0.537047						1.49219	-2.23086	4.75889	2.21228	-0.801726	1.27899			1.49219	-2.23086	4.75889	2.21228	-0.801726	1.27899		0.325859		-0.443559	0.233582	0.85052
B8AZ14	10.3919	9.45765	10.2871	7.68271	11.0896	9.32091	3	3	6			1.70776	0.392761	1.37421	-1.65872	1.18938	0.633819		0.606536						3.56916	0.819765	2.86045	-3.48053	2.40014	1.2789			3.56916	0.819765	2.86045	-3.48053	2.40014	1.2789		0.345766		-2.35029	1.73052	0.301344
Q7XP59	9.63655	11.9426	10.8454	9.5235	10.8951	9.31825	3	3	6			0.952429	2.87774	1.93249	0.182066	0.994856	0.631155		1.26179						1.99054	6.00638	4.02251	0.382033	2.00759	1.27352			1.99054	6.00638	4.02251	0.382033	2.00759	1.27352		0.282312		-2.78543	3.47483	0.0899442
Q8LA13	9.11569	11.5339	11.2884	10.225	12.5413	9.31753	3	3	6			0.431571	2.46903	2.37548	0.883529	2.64105	0.630432		1.57185						0.901966	5.15332	4.94461	1.85393	5.32955	1.27206			0.901966	5.15332	4.94461	1.85393	5.32955	1.27206		0.911926		-0.848121	0.567852	0.67462
Q2NND9	8.08476	8.64014	10.7541	7.96272	10.0638	9.31712	3	3	6			-0.599368	-0.424751	1.84113	-1.37871	0.163535	0.630025		0.0386424						-1.25266	-0.886534	3.83235	-2.89298	0.330007	1.27124			-1.25266	-0.886534	3.83235	-2.89298	0.330007	1.27124		0.744453		-0.994965	0.609668	0.655347
Q6YTF5	9.10331	9.54467	8.06523	9.88769	10.5608	9.31544	3	3	6			0.419191	0.479788	-0.847696	0.546256	0.660545	0.62835		0.314406						0.876093	1.00141	-1.7645	1.14622	1.33296	1.26786			0.876093	1.00141	-1.7645	1.14622	1.33296	1.26786		0.00733796		1.21135	1.68425	0.311165
B9EXM2	8.40523	12.0292	10.5571	10.0251	11.765	9.31519	3	3	6			-0.278897	2.96433	1.64416	0.683702	1.86473	0.628101		1.25102						-0.582883	6.18712	3.42235	1.43463	3.76297	1.26736			-0.582883	6.18712	3.42235	1.43463	3.76297	1.26736		0.28763		-0.853877	0.497743	0.708214
Q6Z4U2	7.64559	8.82515	9.23986	10.2869	9.60763	9.31334	3	3	6			-1.03854	-0.239738	0.326938	0.945467	-0.292639	0.626243		0.0546223						-2.1705	-0.500377	0.680527	1.98389	-0.590536	1.26361			-2.1705	-0.500377	0.680527	1.98389	-0.590536	1.26361		0.924535		1.54911	2.04963	0.241547
Q69QB5	9.65499	11.4511	9.28084	11.9503	12.5042	9.3122	3	3	6			0.970871	2.38622	0.367917	2.60886	2.60391	0.625108		1.59381						2.02908	4.98049	0.765827	5.47423	5.2546	1.26132			2.02908	4.98049	0.765827	5.47423	5.2546	1.26132		0.908222		1.40492	1.02743	0.490583
Q9M1T1	8.3302	5.02596	5.74959	6.71891	7.65771	9.31161	3	3	6			-0.353923	-4.03893	-3.16334	-2.62253	-2.24255	0.624518		-1.96613						-0.739686	-8.43	-6.58455	-5.5029	-4.5254	1.26013			-0.739686	-8.43	-6.58455	-5.5029	-4.5254	1.26013		0.906473		2.32869	1.00341	0.498818
Q6K4N0	9.28448	8.40858	5.32236	5.32898	14.2866	9.30684	3	3	6			0.600354	-0.656303	-3.59056	-4.01246	4.38629	0.619742		-0.442156						1.25472	-1.36983	-7.47383	-8.41942	8.8514	1.25049			1.25472	-1.36983	-7.47383	-8.41942	8.8514	1.25049		0.422304		3.09047	0.708252	0.612061
Q5JN07	8.67962	8.59246	9.10287	7.91648	9.76212	9.30399	3	3	6			-0.00450242	-0.47243	0.189945	-1.42496	-0.138149	0.616892		-0.205534						-0.00940988	-0.98605	0.395374	-2.99002	-0.27878	1.24474			-0.00940988	-0.98605	0.395374	-2.99002	-0.27878	1.24474		0.197577		-0.474658	0.445403	0.734379
O56042	9.69035	10.8684	10.0778	10.9366	14.9087	9.30369	3	3	6			1.00622	1.80347	1.16483	1.59513	5.00846	0.616595		1.86578						2.10297	3.76419	2.42461	3.34709	10.1069	1.24414			2.10297	3.76419	2.42461	3.34709	10.1069	1.24414		0.0698684		2.13545	1.06937	0.476526
Q8LQJ8	8.77949	6.5092	10.8868	9.24086	12.9691	9.30337	3	3	6			0.0953663	-2.55568	1.97384	-0.100574	3.06885	0.616276		0.516346						0.199312	-5.33419	4.10859	-0.211037	6.19284	1.2435			0.199312	-5.33419	4.10859	-0.211037	6.19284	1.2435		0.667241		2.75053	1.12521	0.458436
Q2F969	9.04013	10.7899	9.82053	5.95031	9.65336	9.30259	3	3	6			0.356002	1.72497	0.907607	-3.39113	-0.2469	0.615499		-0.00565869						0.744031	3.60034	1.8892	-7.11568	-0.498237	1.24193			0.744031	3.60034	1.8892	-7.11568	-0.498237	1.24193		0.192117		-4.20185	2.38316	0.191689
Q657S5	9.77388	10.6466	9.05577	9.26423	11.9723	9.299	3	3	6			1.08976	1.58176	0.142847	-0.0772057	2.072	0.611908		0.903511						2.27755	3.30143	0.297339	-0.162002	4.18122	1.23468			2.27755	3.30143	0.297339	-0.162002	4.18122	1.23468		0.643549		-0.207473	0.151581	0.900263
Q0JA81	9.15462	9.09273	9.23364	11.416	10.8718	9.29524	3	3	6			0.470492	0.0278436	0.32072	2.07452	0.971486	0.608147		0.745534						0.983311	0.0581148	0.667586	4.353	1.96043	1.2271			0.983311	0.0581148	0.667586	4.353	1.96043	1.2271		0.15289		1.94384	3.07224	0.118895
Q8RZL1	8.71129	9.59158	11.1577	8.86003	9.13114	9.29478	3	3	6			0.0271651	0.526691	2.24474	-0.481406	-0.769128	0.607688		0.359292						0.0567741	1.0993	4.67247	-1.01014	-1.55208	1.22617			0.0567741	1.0993	4.67247	-1.01014	-1.55208	1.22617		0.540284		-2.3882	2.19688	0.218109
Q0JIL1	9.73574	9.65691	8.91427	8.40829	10.3932	9.29313	3	3	6			1.05162	0.59202	0.00134206	-0.93315	0.492911	0.606033		0.301796						2.19784	1.23566	0.00279352	-1.95805	0.994678	1.22283			2.19784	1.23566	0.00279352	-1.95805	0.994678	1.22283		0.555508		-1.05894	1.22005	0.429267
Q0INM3	8.77324	8.54593	8.89282	10.6121	10.9994	9.29294	3	3	6			0.0891149	-0.518957	-0.0201075	1.27069	1.0991	0.605849		0.420949						0.186247	-1.08316	-0.0418541	2.66632	2.21795	1.22246			0.186247	-1.08316	-0.0418541	2.66632	2.21795	1.22246		0.912187		2.3485	6.02506	0.0153559
Q84ZL0	10.3125	10.5096	11.1062	8.44008	11.2485	9.29202	3	3	6			1.62842	1.44469	2.19325	-0.901357	1.3482	0.604928		1.05302						3.40333	3.01534	4.56529	-1.89134	2.72062	1.2206			3.40333	3.01534	4.56529	-1.89134	2.72062	1.2206		0.210364		-2.97803	3.22796	0.10673
Q9SL78	8.16012	8.78637	9.5292	8.06388	9.33573	9.29186	3	3	6			-0.524	-0.278519	0.616273	-1.27756	-0.56454	0.604767		-0.237263						-1.09514	-0.581322	1.28278	-2.68072	-1.13922	1.22028			-1.09514	-0.581322	1.28278	-2.68072	-1.13922	1.22028		0.577086		-0.73533	0.704626	0.613602
Q0ILZ4	11.5049	8.66814	11.7835	8.72086	13.4213	9.2881	3	3	6			2.8208	-0.396747	2.87061	-0.620577	3.52101	0.601011		1.46602						5.89535	-0.828085	5.97523	-1.30217	7.10529	1.2127			5.89535	-0.828085	5.97523	-1.30217	7.10529	1.2127		0.900426		-1.34223	0.494177	0.709966
Q7XPY5	10.3247	9.97785	10.6848	9.31997	9.79328	9.28734	3	3	6			1.64062	0.912965	1.77191	-0.0214716	-0.106987	0.600249		0.799548						3.42883	1.90553	3.68827	-0.0450543	-0.215896	1.21116			3.42883	1.90553	3.68827	-0.0450543	-0.215896	1.21116		0.791286		-2.69081	5.66245	0.0197439
Q9SW44	7.78254	12.0505	10.1867	10.2329	12.3226	9.28651	3	3	6			-0.901584	2.98561	1.27381	0.891463	2.42234	0.599418		1.21184						-1.88428	6.23152	2.65146	1.87057	4.8882	1.20948			-1.88428	6.23152	2.65146	1.87057	4.8882	1.20948		0.37727		0.323183	0.140317	0.90732
Q5VPG8	8.18473	10.3738	5.55431	8.26702	6.57419	9.28605	3	3	6			-0.499397	1.30896	-3.35861	-1.07442	-3.32607	0.598955		-1.05843						-1.04372	2.73204	-6.99102	-2.25447	-6.71191	1.20855			-1.04372	2.73204	-6.99102	-2.25447	-6.71191	1.20855		0.792386		-0.818375	0.263226	0.833223
Q9M126	8.18264	9.37556	6.15141	8.2709	10.0114	9.28464	3	3	6			-0.501481	0.310674	-2.76151	-1.07053	0.111102	0.597545		-0.552368						-1.04808	0.648434	-5.74814	-2.24632	0.2242	1.2057			-1.04808	0.648434	-5.74814	-2.24632	0.2242	1.2057		0.44736		1.77712	1.12323	0.459066
Q657G7	9.48991	11.3071	9.51491	8.39227	11.1455	9.28448	3	3	6			0.805785	2.24226	0.601988	-0.949163	1.24522	0.597383		0.757245						1.68406	4.68001	1.25305	-1.99165	2.51282	1.20538			1.68406	4.68001	1.25305	-1.99165	2.51282	1.20538		0.787016		-1.96352	1.65822	0.316829
Q2QV81	9.93117	8.98598	10.864	11.9356	13.9434	9.27633	3	3	6			1.24704	-0.0789029	1.95103	2.59417	4.04317	0.58924		1.72429						2.60627	-0.164685	4.06111	5.4434	8.15898	1.18895			2.60627	-0.164685	4.06111	5.4434	8.15898	1.18895		0.543754		2.76287	1.6909	0.309734
Q6EPQ3	9.83002	9.96565	9.23149	10.0178	9.97814	9.27419	3	3	6			1.1459	0.900767	0.318562	0.676346	0.0778734	0.587098		0.617758						2.39489	1.88007	0.663093	1.41919	0.157146	1.18462			2.39489	1.88007	0.663093	1.41919	0.157146	1.18462		0.725897		-0.725698	1.63328	0.322354
Q69SV0	8.53154	10.5742	10.1731	11.8863	6.53381	9.27361	3	3	6			-0.152586	1.50933	1.26013	2.54491	-3.36645	0.586515		0.396973						-0.318899	3.15025	2.62299	5.34003	-6.79339	1.18345			-0.318899	3.15025	2.62299	5.34003	-6.79339	1.18345		0.168351		-1.90808	0.655096	0.635033
Q6K7B8	4.97874	8.72891	4.2552	8.99774	9.12474	9.27324	3	3	6			-3.70538	-0.33598	-4.65772	-0.343693	-0.775523	0.586142		-1.53869						-7.7441	-0.701254	-9.69515	-0.721178	-1.56498	1.1827			-7.7441	-0.701254	-9.69515	-0.721178	-1.56498	1.1827		0.162622		5.67901	3.09445	0.117079
Q10RX7	8.81897	10.8928	10.0352	10.5437	11.5307	9.27018	3	3	6			0.134842	1.82796	1.12229	1.20227	1.63043	0.583084		1.08348						0.281815	3.81529	2.33607	2.52275	3.29016	1.17653			0.281815	3.81529	2.33607	2.52275	3.29016	1.17653		0.533238		0.185421	0.177334	0.884336
Q75IV7	10.9109	8.4683	7.63336	10.7874	11.8264	9.26882	3	3	6			2.22682	-0.596589	-1.27956	1.44598	1.92612	0.581729		0.717416						4.65397	-1.24519	-2.66344	3.03412	3.88686	1.17379			4.65397	-1.24519	-2.66344	3.03412	3.88686	1.17379		0.226657		2.44981	1.46842	0.361377
Q2QQJ5	9.48224	5.79688	10.4909	9.49129	10.5173	9.26597	3	3	6			0.79812	-3.268	1.57793	0.149855	0.617011	0.578873		0.0756303						1.66804	-6.82094	3.28449	0.314443	1.24511	1.16803			1.66804	-6.82094	3.28449	0.314443	1.24511	1.16803		0.0179453		1.532	0.569462	0.673868
Q10P87	7.87437	6.09259	6.50142	5.37205	11.1162	9.26475	3	3	6			-0.809757	-2.9723	-2.4115	-3.96939	1.21595	0.577654		-1.39489						-1.69236	-6.20375	-5.01959	-8.32905	2.45375	1.16557			-1.69236	-6.20375	-5.01959	-8.32905	2.45375	1.16557		0.272521		2.73532	1.01099	0.496204
Q2QVG9	9.1517	7.8759	10.5317	6.50581	10.5299	9.26026	3	3	6			0.467578	-1.18898	1.61875	-2.83563	0.629654	0.573167		-0.122577						0.977221	-2.48163	3.36946	-5.95005	1.27062	1.15651			0.977221	-2.48163	3.36946	-5.95005	1.27062	1.15651		0.671796		-1.79599	0.803156	0.573094
Q8RU31	9.89139	10.599	9.36326	9.61906	8.05675	9.25925	3	3	6			1.20727	1.5341	0.450335	0.277627	-1.84352	0.572155		0.366327						2.52314	3.20195	0.937382	0.582551	-3.72016	1.15447			2.52314	3.20195	0.937382	0.582551	-3.72016	1.15447		0.319632		-2.88187	2.6339	0.161107
Q653Z5	9.8458	9.62271	10.9096	8.10852	6.76633	9.25854	3	3	6			1.16168	0.557824	1.99667	-1.23291	-3.13393	0.571448		-0.0132042						2.42787	1.16428	4.15611	-2.58704	-6.32418	1.15305			2.42787	1.16428	4.15611	-2.58704	-6.32418	1.15305		0.277922		-5.16881	3.46743	0.0904068
Q9SF32	13.0731	9.5686	8.72914	8.27034	13.8418	9.25082	3	3	6			4.389	0.503715	-0.183779	-1.0711	3.9415	0.563725		1.35718						9.17284	1.05135	-0.382539	-2.2475	7.95381	1.13746			9.17284	1.05135	-0.382539	-2.2475	7.95381	1.13746		0.991698		-0.99929	0.27815	0.824648
Q6ETK3	10.8598	9.52581	4.06376	11.1073	8.24298	9.2432	3	3	6			2.17564	0.460927	-4.84916	1.76591	-1.65728	0.556104		-0.257976						4.54701	0.962042	-10.0936	3.70544	-3.34434	1.12209			4.54701	0.962042	-10.0936	3.70544	-3.34434	1.12209		0.35853		2.02259	0.516961	0.698842
Q67UU9	9.82459	10.1083	9.78749	9.68923	10.4448	9.24203	3	3	6			1.14047	1.04338	0.874571	0.347792	0.544543	0.554937		0.750948						2.38354	2.17772	1.82044	0.729779	1.09887	1.11973			2.38354	2.17772	1.82044	0.729779	1.09887	1.11973		0.744312		-1.14444	7.56398	0.00528463
Q6ZDF3	9.97312	10.5759	5.54733	9.48111	9.76205	9.24	3	3	6			1.289	1.51103	-3.3656	0.139676	-0.138215	0.55291		-0.00186596						2.69396	3.1538	-7.00556	0.293085	-0.278914	1.11564			2.69396	3.1538	-7.00556	0.293085	-0.278914	1.11564		0.029419		0.762536	0.251631	0.839946
Q8S9Z2	12.8406	6.97338	11.6215	7.58534	7.95099	9.23984	3	3	6			4.15646	-2.09151	2.70862	-1.7561	-1.94927	0.552743		0.270158						8.68684	-4.36536	5.63806	-3.68486	-3.93357	1.1153			8.68684	-4.36536	5.63806	-3.68486	-3.93357	1.1153		0.296021		-5.48755	1.89869	0.268187
Q0IMS9	9.2571	11.4932	9.20967	9.59692	14.8007	9.23728	3	3	6			0.572982	2.42827	0.296749	0.255479	4.90048	0.550188		1.50069						1.19751	5.06825	0.61769	0.536077	9.88902	1.11015			1.19751	5.06825	0.61769	0.536077	9.88902	1.11015		0.35126		1.5506	0.586404	0.666001
Q9SDG8	8.77393	11.9447	10.1254	7.92582	12.1827	9.23508	3	3	6			0.0898072	2.87986	1.21249	-1.41562	2.28244	0.547987		0.932828						0.187694	6.01081	2.52382	-2.97041	4.60589	1.10571			0.187694	6.01081	2.52382	-2.97041	4.60589	1.10571		0.747872		-1.99372	0.968532	0.511026
Q9C8J1	7.88716	13.0099	9.71373	9.58585	10.0519	9.23285	3	3	6			-0.796964	3.94499	0.800807	0.244408	0.151624	0.545759		0.815105						-1.66562	8.23394	1.6669	0.512846	0.305972	1.10121			-1.66562	8.23394	1.6669	0.512846	0.305972	1.10121		0.0133291		-2.10506	0.876416	0.544719
E3VXF2	6.37693	11.1144	11.547	11.666	7.90653	9.2275	3	3	6			-2.30719	2.04951	2.63412	2.32456	-1.99374	0.540402		0.541277						-4.82194	4.2777	5.48297	4.87768	-4.02329	1.0904			-4.82194	4.2777	5.48297	4.87768	-4.02329	1.0904		0.771973		-0.997981	0.283091	0.821828
Q6YUA8	9.71586	2.76269	8.79705	9.25479	10.4728	9.22574	3	3	6			1.03174	-6.3022	-0.115878	-0.0866448	0.572527	0.538644		-0.726969						2.15629	-13.1539	-0.241203	-0.181808	1.15534	1.08685			2.15629	-13.1539	-0.241203	-0.181808	1.15534	1.08685		0.0165843		4.43306	1.15274	0.44977
Q6AUK6	3.89898	11.1494	8.27207	8.9092	11.4586	9.2255	3	3	6			-4.78514	2.08448	-0.640854	-0.432234	1.5583	0.538403		-0.279509						-10.0008	4.3507	-1.33395	-0.906965	3.14459	1.08637			-10.0008	4.3507	-1.33395	-0.906965	3.14459	1.08637		0.145701		3.436	1.0825	0.472211
Q8S7E1	8.8288	10.4296	7.21461	10.7188	8.70124	9.22275	3	3	6			0.14468	1.36473	-1.69831	1.37735	-1.19903	0.535653		0.0875121						0.302375	2.84845	-3.53507	2.89013	-2.4196	1.08082			0.302375	2.84845	-3.53507	2.89013	-2.4196	1.08082		0.827417		0.6452	0.316194	0.803186
Q6ZIU9	8.5938	9.01248	10.5617	10.1523	10.0897	9.22246	3	3	6			-0.0903213	-0.0524022	1.64875	0.810848	0.18945	0.535363		0.506947						-0.188768	-0.109373	3.4319	1.70142	0.382305	1.08023			-0.188768	-0.109373	3.4319	1.70142	0.382305	1.08023		0.184868		0.010066	0.00871718	0.993976
Q8GUG7	9.22952	10.1616	10.0971	10.4458	9.93811	9.21953	3	3	6			0.545393	1.09675	1.18419	1.10441	0.0378443	0.532438		0.750169						1.13985	2.28912	2.46491	2.3174	0.0763686	1.07433			1.13985	2.28912	2.46491	2.3174	0.0763686	1.07433		0.58243		-0.808595	1.50271	0.35289
Q2RBR1	8.18418	10.6178	10.0775	10.5005	11.4475	9.21662	3	3	6			-0.499942	1.55295	1.16456	1.15911	1.54723	0.529531		0.908906						-1.04486	3.24129	2.42406	2.43217	3.12226	1.06847			-1.04486	3.24129	2.42406	2.43217	3.12226	1.06847		0.348373		0.667472	0.5814	0.668315
Q5Z856	8.48599	8.76208	10.281	12.3389	11.7852	9.21493	3	3	6			-0.198133	-0.302804	1.36808	2.99744	1.88498	0.527832		1.04623						-0.41409	-0.632009	2.84769	6.28958	3.80383	1.06504			-0.41409	-0.632009	2.84769	6.28958	3.80383	1.06504		0.714903		3.11896	2.5324	0.172851
Q7F1M0	7.85736	10.1685	10.699	12.1441	11.1604	9.21449	3	3	6			-0.826764	1.10366	1.78604	2.80268	1.26017	0.527395		1.10886						-1.72791	2.30355	3.71768	5.88092	2.54299	1.06416			-1.72791	2.30355	3.71768	5.88092	2.54299	1.06416		0.86526		1.73158	1.09298	0.468791
Q7XDY9	11.4466	10.026	10.2353	10.347	12.9676	9.21325	3	3	6			2.76249	0.961083	1.32237	1.00552	3.06732	0.526156		1.60749						5.77351	2.00596	2.75255	2.1099	6.18976	1.06166			5.77351	2.00596	2.75255	2.1099	6.18976	1.06166		0.703128		-0.390234	0.233474	0.850584
B9FSH5	10.6897	9.9521	10.9477	9.48438	11.5242	9.2122	3	3	6			2.00561	0.887213	2.03479	0.142943	1.62398	0.525111		1.20327						4.19165	1.85178	4.23545	0.299939	3.27714	1.05955			4.19165	1.85178	4.23545	0.299939	3.27714	1.05955		0.874607		-1.88075	2.40092	0.189344
Q851Q6	10.2919	8.97441	8.96653	9.03202	9.88987	9.2113	3	3	6			1.60774	-0.0904725	0.0536108	-0.309419	-0.010396	0.52421		0.295879						3.36011	-0.188833	0.111592	-0.64926	-0.0209789	1.05773			3.36011	-0.188833	0.111592	-0.64926	-0.0209789	1.05773		0.322781		-0.965126	1.05861	0.480096
O82117	10.7205	8.72124	8.26463	9.97384	9.08746	9.21067	3	3	6			2.03638	-0.343651	-0.648293	0.632404	-0.812802	0.523577		0.231269						4.25595	-0.717265	-1.34944	1.32698	-1.64021	1.05645			4.25595	-0.717265	-1.34944	1.32698	-1.64021	1.05645		0.444261		-0.482006	0.282358	0.822246
Q851S8	7.40148	7.79747	6.62834	9.93211	11.825	9.20948	3	3	6			-1.28265	-1.26742	-2.28459	0.590674	1.92477	0.522384		-0.29947						-2.68068	-2.64534	-4.75542	1.23942	3.88413	1.05405			-2.68068	-2.64534	-4.75542	1.23942	3.88413	1.05405		0.736093		5.41968	6.7618	0.00921498
Q2R837	9.34587	9.42421	7.04407	5.42085	6.78175	9.20565	3	3	6			0.661748	0.359321	-1.86886	-3.92058	-3.11851	0.518553		-1.22806						1.38303	0.749971	-3.89007	-8.22664	-6.29306	1.04632			1.38303	0.749971	-3.89007	-8.22664	-6.29306	1.04632		0.514524		-3.90544	1.74053	0.29926
P0C5C9	8.67948	6.9486	11.6359	8.8248	7.89142	9.20369	3	3	6			-0.00464316	-2.11629	2.72293	-0.516638	-2.00885	0.516597		-0.234481						-0.00970402	-4.41709	5.66784	-1.08407	-4.05379	1.04237			-0.00970402	-4.41709	5.66784	-1.08407	-4.05379	1.04237		0.408059		-1.77884	0.700094	0.615532
Q9XGP7	9.70527	9.41775	7.7117	8.11463	7.63474	9.20014	3	3	6			1.02115	0.35286	-1.20122	-1.22681	-2.26553	0.513044		-0.467751						2.13416	0.736485	-2.50037	-2.57424	-4.57176	1.0352			2.13416	0.736485	-2.50037	-2.57424	-4.57176	1.0352		0.82339		-2.16036	1.43572	0.369662
B9DFG3	11.0743	11.4373	11.3791	10.206	11.3562	9.1981	3	3	6			2.39015	2.3724	2.46618	0.8646	1.45591	0.511007		1.67671						4.99533	4.95164	5.13341	1.81421	2.93798	1.03109			4.99533	4.95164	5.13341	1.81421	2.93798	1.03109		0.0194092		-3.09903	5.08722	0.0294166
Q0JP11	10.9825	9.03094	10.1773	8.08688	9.75974	9.19729	3	3	6			2.29837	-0.0339441	1.26437	-1.25456	-0.140527	0.510196		0.440652						4.80351	-0.0708478	2.63182	-2.63246	-0.283578	1.02946			4.80351	-0.0708478	2.63182	-2.63246	-0.283578	1.02946		0.731902		-3.08369	2.67535	0.156545
O92605	6.49996	11.4002	12.2132	11.2466	7.27109	9.19628	3	3	6			-2.18417	2.33535	3.3003	1.90518	-2.62918	0.509188		0.539448						-4.56482	4.87432	6.86965	3.99769	-5.30559	1.02742			-4.56482	4.87432	6.86965	3.99769	-5.30559	1.02742		0.754122		-2.48654	0.719032	0.607505
F4I2H2	10.7477	11.6466	11.2426	10.5585	11.0339	9.19089	3	3	6			2.06357	2.58176	2.32966	1.21708	1.13364	0.503792		1.63825						4.31277	5.38862	4.84923	2.55382	2.28765	1.01653			4.31277	5.38862	4.84923	2.55382	2.28765	1.01653		0.600129		-2.89754	7.17272	0.00693103
Q9LWM4	9.08398	8.75188	8.67529	8.75198	9.58918	9.18834	3	3	6			0.399861	-0.313008	-0.237637	-0.589458	-0.311082	0.501248		-0.0916794						0.835695	-0.653307	-0.494646	-1.23687	-0.627753	1.0114			0.835695	-0.653307	-0.494646	-1.23687	-0.627753	1.0114		0.661809		-0.180323	0.256953	0.836853
Q10S72	2.28401	9.71127	5.53708	8.17443	10.6154	9.18416	3	3	6			-6.40011	0.646384	-3.37584	-1.16701	0.715181	0.497062		-1.51406						-13.376	1.34913	-7.02689	-2.44876	1.44321	1.00295			-13.376	1.34913	-7.02689	-2.44876	1.44321	1.00295		0.153746		6.35039	2.14743	0.225715
Q2QMI0	11.1213	8.2341	10.1087	7.62651	7.12701	9.17854	3	3	6			2.43722	-0.830788	1.19573	-1.71493	-2.77325	0.491446		-0.199095						5.09369	-1.73401	2.48894	-3.59846	-5.59633	0.991622			5.09369	-1.73401	2.48894	-3.59846	-5.59633	0.991622		0.980142		-4.68393	2.57353	0.167992
Q0J9V3	10.2901	11.6546	11.0132	10.6997	11.2025	9.17729	3	3	6			1.60601	2.5897	2.10026	1.35822	1.30223	0.490201		1.57444						3.3565	5.4052	4.37173	2.84998	2.62785	0.989109			3.3565	5.4052	4.37173	2.84998	2.62785	0.989109		0.992137		-2.22216	4.15935	0.0559641
P93422	11.1122	10.5096	9.67823	10.933	12.6781	9.1754	3	3	6			2.42812	1.44469	0.765307	1.59159	2.77787	0.488306		1.58265						5.07468	3.01534	1.593	3.33966	5.60566	0.985285			5.07468	3.01534	1.593	3.33966	5.60566	0.985285		0.729434		0.082528	0.0543428	0.963033
P0C524	4.35621	7.19702	5.94301	9.36486	11.2379	9.17425	3	3	6			-4.32791	-1.86787	-2.96992	0.0234197	1.33766	0.487158		-1.21958						-9.04516	-3.89859	-6.18194	0.049142	2.69936	0.982968			-9.04516	-3.89859	-6.18194	0.049142	2.69936	0.982968		0.427337		7.61906	6.57161	0.0105135
Q2QY04	9.32382	9.83442	11.1217	9.10339	10.6634	9.1708	3	3	6			0.639697	0.769537	2.2088	-0.238044	0.763115	0.483707		0.771136						1.33694	1.60617	4.59767	-0.499493	1.53994	0.976006			1.33694	1.60617	4.59767	-0.499493	1.53994	0.976006		0.505878		-1.84144	2.30483	0.202385
Q6ENB2	3.52707	6.60732	7.99904	8.22511	9.5108	9.1636	3	3	6			-5.15705	-2.45757	-0.913882	-1.11633	-0.389461	0.476505		-1.59296						-10.778	-5.12941	-1.90226	-2.34241	-0.78592	0.961475			-10.778	-5.12941	-1.90226	-2.34241	-0.78592	0.961475		0.238437		5.21429	2.91854	0.132261
Q689G9	9.5509	10.1536	9.34292	7.68839	10.8483	9.16312	3	3	6			0.866777	1.08866	0.429996	-1.65305	0.948045	0.476027		0.359411						1.81153	2.27225	0.895045	-3.46862	1.91312	0.96051			1.81153	2.27225	0.895045	-3.46862	1.91312	0.96051		0.112474		-1.85794	1.56685	0.337545
Q852Q2	9.50631	10.3009	8.16812	9.88498	10.0294	9.16154	3	3	6			0.822184	1.23604	-0.744803	0.543542	0.12916	0.474441		0.410094						1.71833	2.57984	-1.55032	1.14053	0.260641	0.957309			1.71833	2.57984	-1.55032	1.14053	0.260641	0.957309		0.0868509		-0.129792	0.113291	0.924477
Q0IQF7	8.50152	12.0936	7.90213	11.5282	14.5904	9.16108	3	3	6			-0.182604	3.0287	-1.01079	2.18677	4.69009	0.473987		1.53102						-0.381636	6.32146	-2.10398	4.58855	9.46445	0.956394			-0.381636	6.32146	-2.10398	4.58855	9.46445	0.956394		0.958237		3.72452	1.49564	0.354624
Q0D5B9	6.97911	5.12862	7.93729	10.3607	9.86391	9.15972	3	3	6			-1.70501	-3.93626	-0.975638	1.0193	-0.0363575	0.472626		-0.860224						-3.56341	-8.21572	-2.03081	2.13882	-0.0733683	0.953647			-3.56341	-8.21572	-2.03081	2.13882	-0.0733683	0.953647		0.2113		5.60968	4.43396	0.0462644
Q0DK78	7.65406	8.82985	6.61937	9.42272	10.4672	9.15507	3	3	6			-1.03006	-0.235038	-2.29355	0.0812794	0.566933	0.467977		-0.407077						-2.15279	-0.490568	-4.77408	0.17055	1.14405	0.944267			-2.15279	-0.490568	-4.77408	0.17055	1.14405	0.944267		0.107292		3.22543	3.93023	0.065597
P37833	5.13976	10.275	7.91313	10.2983	12.6795	9.15462	3	3	6			-3.54437	1.21007	-0.999795	0.956855	2.77919	0.467522		0.144913						-7.40759	2.52565	-2.08109	2.00779	5.60832	0.943347			-7.40759	2.52565	-2.08109	2.00779	5.60832	0.943347		0.389512		5.17416	2.46581	0.181016
P0C550	6.8857	9.33756	9.26941	9.14738	11.8449	9.15348	3	3	6			-1.79843	0.272668	0.356484	-0.194054	1.94468	0.466382		0.174621						-3.75864	0.569109	0.742028	-0.407188	3.92429	0.941048			-3.75864	0.569109	0.742028	-0.407188	3.92429	0.941048		0.860775		2.30189	1.72084	0.303373
Q7XK44	6.11201	8.3189	10.3087	8.28817	8.76663	9.1498	3	3	6			-2.57211	-0.745983	1.39576	-1.05326	-1.13364	0.462704		-0.607756						-5.37561	-1.55701	2.9053	-2.21008	-2.28764	0.933626			-5.37561	-1.55701	2.9053	-2.21008	-2.28764	0.933626		0.328631		0.154408	0.0652334	0.955791
Q8LH03	9.13245	10.5465	8.70525	8.77406	9.32087	9.14919	3	3	6			0.448325	1.48162	-0.207671	-0.567375	-0.579397	0.462094		0.172933						0.936982	3.09242	-0.432272	-1.19053	-1.1692	0.932396			0.936982	3.09242	-0.432272	-1.19053	-1.1692	0.932396		0.640443		-1.67482	2.00276	0.249522
Q7XQ97	8.74745	4.3717	8.70639	9.30859	11.2286	9.14591	3	3	6			0.0633313	-4.69319	-0.206531	-0.0328479	1.32831	0.458813		-0.513685						0.13236	-9.79557	-0.429899	-0.0689254	2.68049	0.925775			0.13236	-9.79557	-0.429899	-0.0689254	2.68049	0.925775		0.11732		4.54348	2.04217	0.242798
Q6ENJ6	9.10732	7.68313	11.1346	9.46834	10.7415	9.14387	3	3	6			0.423198	-1.38175	2.22163	0.126902	0.841202	0.456774		0.447993						0.884469	-2.88398	4.62437	0.26628	1.69752	0.921661			0.884469	-2.88398	4.62437	0.26628	1.69752	0.921661		0.0702831		0.086865	0.0432222	0.970485
Q9C7E9	9.32152	7.76481	8.6388	9.82544	9.76952	9.13937	3	3	6			0.637399	-1.30008	-0.274126	0.483999	-0.130741	0.452278		-0.0218788						1.33214	-2.71352	-0.570598	1.01558	-0.263831	0.91259			1.33214	-2.71352	-0.570598	1.01558	-0.263831	0.91259		0.219582		1.20544	1.3751	0.385526
Q0WLC7	9.47921	7.76381	9.62266	10.4457	10.4013	9.13684	3	3	6			0.795091	-1.30108	0.709732	1.1043	0.501041	0.449743		0.376472						1.66171	-2.71559	1.47732	2.31718	1.01108	0.907475			1.66171	-2.71559	1.47732	2.31718	1.01108	0.907475		0.183002		1.27077	1.16974	0.444501
Q65XK0	8.66338	8.79967	10.0246	11.4507	9.81065	9.13507	3	3	6			-0.0207431	-0.265217	1.11166	2.10926	-0.089613	0.447974		0.548887						-0.0433522	-0.553558	2.31395	4.4259	-0.180836	0.903905			-0.0433522	-0.553558	2.31395	4.4259	-0.180836	0.903905		0.574895		1.14398	0.927923	0.525614
B9F1C0	10.7437	10.5569	10.2795	11.9378	11.6631	9.13448	3	3	6			2.05953	1.492	1.36657	2.59634	1.7628	0.447384		1.62077						4.30435	3.11409	2.84455	5.44795	3.55728	0.902714			4.30435	3.11409	2.84455	5.44795	3.55728	0.902714		0.207466		-0.118344	0.0948745	0.936354
Q2R0K3	9.12495	10.7655	9.04023	9.85381	8.49141	9.13445	3	3	6			0.440825	1.70056	0.127311	0.512371	-1.40885	0.447358		0.303263						0.921308	3.5494	0.265001	1.07512	-2.84302	0.902662			0.921308	3.5494	0.265001	1.07512	-2.84302	0.902662		0.762565		-1.86698	1.6682	0.314645
Q2RAK2	11.3456	10.9576	7.54844	11.6751	10.2293	9.13317	3	3	6			2.66145	1.89272	-1.36449	2.33368	0.329035	0.446074		1.04975						5.56233	3.95047	-2.84021	4.89681	0.663981	0.900071			5.56233	3.95047	-2.84021	4.89681	0.663981	0.900071		0.442991		-0.0705744	0.0264071	0.981863
Q6ZLB0	9.8269	4.96468	8.54021	5.03589	10.5425	9.13188	3	3	6			1.14277	-4.10021	-0.372718	-4.30555	0.642187	0.444789		-1.09145						2.38836	-8.55791	-0.77582	-9.03442	1.29591	0.897478			2.38836	-8.55791	-0.77582	-9.03442	1.29591	0.897478		0.961801		0.0347824	0.0080471	0.994438
Q69LE7	7.31406	13.3699	12.8992	9.09624	11.7663	9.13067	3	3	6			-1.37006	4.30498	3.9863	-0.245196	1.86602	0.44358		1.4976						-2.86338	8.98531	8.29757	-0.5145	3.76556	0.895038			-2.86338	8.98531	8.29757	-0.5145	3.76556	0.895038		0.194203		-3.42447	1.1697	0.444513
Q7XKF3	9.41147	11.9088	5.6748	10.5934	11.5038	9.12469	3	3	6			0.727345	2.84392	-3.23812	1.25195	1.60351	0.437596		0.604367						1.52012	5.93579	-6.74022	2.627	3.23583	0.882965			1.52012	5.93579	-6.74022	2.627	3.23583	0.882965		0.0695391		2.01003	0.682308	0.623167
Q9XIF2	11.6895	9.91904	11.2997	12.1283	12.4292	9.12459	3	3	6			3.00535	0.854155	2.38674	2.78691	2.52893	0.437493		1.99993						6.28107	1.78278	4.96805	5.84783	5.1033	0.882756			6.28107	1.78278	4.96805	5.84783	5.1033	0.882756		0.85471		-0.399338	0.226763	0.85455
A2Y1D7	10.1083	8.57913	9.09347	9.34773	8.92861	9.12438	3	3	6			1.42414	-0.48576	0.180547	0.00629488	-0.971658	0.437286		0.098475						2.9764	-1.01387	0.375812	0.0132087	-1.96077	0.882339			2.9764	-1.01387	0.375812	0.0132087	-1.96077	0.882339		0.68191		-1.13452	1.07403	0.47499
A3BUD2	8.24703	8.69697	9.99718	7.43571	10.8357	9.1243	3	3	6			-0.437098	-0.36792	1.08426	-1.90573	0.935391	0.437208		-0.0423146						-0.913517	-0.767917	2.2569	-3.99882	1.88759	0.882182			-0.913517	-0.767917	2.2569	-3.99882	1.88759	0.882182		0.488451		-0.601506	0.343915	0.7879
Q9FNU2	8.48188	10.873	8.21228	11.5496	8.99828	9.12353	3	3	6			-0.202243	1.8081	-0.700646	2.2082	-0.901985	0.436433		0.44131						-0.42268	3.77384	-1.45841	4.63352	-1.82018	0.880617			-0.42268	3.77384	-1.45841	4.63352	-1.82018	0.880617		0.844449		0.600404	0.287508	0.819316
Q10PE7	8.24241	8.65939	8.73562	5.84855	9.32132	9.12164	3	3	6			-0.441711	-0.405498	-0.1773	-3.49289	-0.578946	0.434543		-0.776967						-0.92316	-0.84635	-0.369053	-7.3292	-1.16829	0.876805			-0.92316	-0.84635	-0.369053	-7.3292	-1.16829	0.876805		0.0098301		-1.82737	0.899317	0.53614
Q0D5G4	9.8252	11.4059	11.3903	11.5021	10.8971	9.1192	3	3	6			1.14107	2.341	2.47741	2.16065	0.996824	0.432107		1.59151						2.3848	4.8861	5.15677	4.53373	2.01156	0.871888			2.3848	4.8861	5.15677	4.53373	2.01156	0.871888		0.798886		-1.67017	1.7484	0.297633
Q9LS99	7.79006	6.47078	6.60288	10.8815	10.9864	9.11811	3	3	6			-0.894068	-2.59411	-2.31004	1.54006	1.08615	0.431016		-0.456832						-1.86857	-5.41439	-4.8084	3.23154	2.19181	0.869689			-1.86857	-5.41439	-4.8084	3.23154	2.19181	0.869689		0.560677		6.12813	6.798	0.00898664
Q0DWA9	10.7256	10.2759	8.20682	7.21451	8.79799	9.11803	3	3	6			2.0415	1.211	-0.706104	-2.12692	-1.10228	0.430939		-0.0419776						4.26665	2.52759	-1.46977	-4.46297	-2.22436	0.869532			4.26665	2.52759	-1.46977	-4.46297	-2.22436	0.869532		0.906343		-3.71409	2.46496	0.181122
Q0DJV6	6.02523	6.75288	8.08677	8.89397	11.2456	9.11744	3	3	6			-2.6589	-2.312	-0.82615	-0.447468	1.34529	0.430341		-0.744815						-5.55699	-4.82559	-1.71965	-0.938931	2.71475	0.868326			-5.55699	-4.82559	-1.71965	-0.938931	2.71475	0.868326		0.891343		4.91546	4.80263	0.0358314
B8AWM1	11.0144	6.30582	11.2955	9.30015	10.5482	9.11718	3	3	6			2.33032	-2.75906	2.38256	-0.0412906	0.647979	0.430082		0.49843						4.87027	-5.75868	4.95935	-0.0866409	1.3076	0.867802			4.87027	-5.75868	4.95935	-0.0866409	1.3076	0.867802		0.0264028		-0.660724	0.200484	0.870258
Q84Z01	9.6372	8.90902	9.18264	9.41196	8.05658	9.11684	3	3	6			0.953081	-0.155864	0.269719	0.0705186	-1.84368	0.429744		-0.0460805						1.9919	-0.325318	0.561426	0.147971	-3.72049	0.867121			1.9919	-0.325318	0.561426	0.147971	-3.72049	0.867121		0.366734		-1.64447	1.49103	0.355759
Q01I07	10.3872	10.0221	9.9544	10.2019	10.7927	9.11554	3	3	6			1.70303	0.957203	1.04148	0.860442	0.892444	0.428444		0.980507						3.55927	1.99786	2.16786	1.80548	1.80092	0.864498			3.55927	1.99786	2.16786	1.80548	1.80092	0.864498		0.571703		-1.0847	2.86304	0.137448
Q0DCM5	5.92925	7.11655	6.84449	10.2258	8.05886	9.11291	3	3	6			-2.75488	-1.94834	-2.06844	0.884373	-1.84141	0.425815		-1.21714						-5.75759	-4.06654	-4.3055	1.8557	-3.7159	0.859193			-5.75759	-4.06654	-4.3055	1.8557	-3.7159	0.859193		0.173309		4.3762	3.80882	0.071356
Q5VQL1	8.34212	11.0347	10.7844	11.0027	10.807	9.11228	3	3	6			-0.342004	1.96984	1.87147	1.66124	0.906687	0.425189		1.08207						-0.714776	4.11143	3.8955	3.48581	1.82967	0.857931			-0.714776	4.11143	3.8955	3.48581	1.82967	0.857931		0.383892		-0.372917	0.248521	0.841759
Q9FF61	11.2546	8.10664	8.95425	9.79041	10.9236	9.10303	3	3	6			2.57049	-0.958246	0.041331	0.448976	1.02336	0.415931		0.590307						5.37223	-2.00004	0.0860314	0.942096	2.06511	0.839251			5.37223	-2.00004	0.0860314	0.942096	2.06511	0.839251		0.0620541		0.12941	0.0641863	0.956485
Q9SAR1	6.32429	10.6913	6.95501	10.052	9.68083	9.10174	3	3	6			-2.35983	1.62642	-1.95791	0.710587	-0.219431	0.414645		-0.297588						-4.93196	3.39464	-4.07544	1.49104	-0.442804	0.836656			-4.93196	3.39464	-4.07544	1.49104	-0.442804	0.836656		0.0881727		2.49922	1.2942	0.407762
Q10I26	9.87427	10.0592	9.02835	9.66789	9.3345	9.09903	3	3	6			1.19015	0.994322	0.115425	0.326455	-0.565768	0.411938		0.412087						2.48737	2.07534	0.240259	0.685007	-1.1417	0.831193			2.48737	2.07534	0.240259	0.685007	-1.1417	0.831193		0.915627		-1.47616	2.39089	0.190664
Q84NP7	8.99237	10.3772	12.759	9.16277	12.5802	9.09835	3	3	6			0.308249	1.31232	3.84609	-0.178668	2.67997	0.411254		1.39654						0.644228	2.73907	8.00572	-0.374903	5.40809	0.829813			0.644228	2.73907	8.00572	-0.374903	5.40809	0.829813		0.785736		-1.842	0.867806	0.54798
Q9LM69	9.91199	7.0766	9.28346	5.98247	7.43179	9.08821	3	3	6			1.22787	-1.98829	0.370535	-3.35897	-2.46847	0.401111		-0.969369						2.5662	-4.14992	0.771277	-7.04819	-4.9813	0.809347			2.5662	-4.14992	0.771277	-7.04819	-4.9813	0.809347		0.843116		-3.46923	1.62299	0.324662
Q9AS36	9.39851	10.6241	10.2932	10.0459	12.4916	9.0881	3	3	6			0.714385	1.55918	1.38032	0.704459	2.59136	0.401005		1.22512						1.49304	3.2543	2.87316	1.47818	5.22929	0.809133			1.49304	3.2543	2.87316	1.47818	5.22929	0.809133		0.262804		-0.0346322	0.0256132	0.982403
Q1EHT7	10.7143	9.11904	8.41481	10.9151	9.58261	9.08799	3	3	6			2.03021	0.0541578	-0.498111	1.57362	-0.317653	0.400899		0.54052						4.24306	0.113037	-1.03683	3.30196	-0.641013	0.808919			4.24306	0.113037	-1.03683	3.30196	-0.641013	0.808919		0.680668		0.0501999	0.0277823	0.980927
O23877	10.8781	9.3579	9.14109	8.43016	9.2624	9.08603	3	3	6			2.19393	0.293017	0.228162	-0.911277	-0.637865	0.398936		0.260817						4.58522	0.611581	0.474924	-1.91215	-1.28719	0.804958			4.58522	0.611581	0.474924	-1.91215	-1.28719	0.804958		0.54178		-2.6887	2.61063	0.163728
Q0JDA2	5.8047	9.52335	6.11882	4.85564	3.65226	9.08526	3	3	6			-2.87942	0.458459	-2.79411	-4.4858	-6.24801	0.398166		-2.59179						-6.01789	0.956891	-5.81599	-9.41263	-12.6083	0.803404			-6.01789	0.956891	-5.81599	-9.41263	-12.6083	0.803404		0.486155		-3.44684	1.00116	0.499597
Q0JCC3	12.1472	9.04237	9.34305	9.46716	11.2267	9.08465	3	3	6			3.46311	-0.0225164	0.430129	0.12572	1.32639	0.397555		0.953398						7.23777	-0.0469959	0.895323	0.263801	2.67661	0.802171			7.23777	-0.0469959	0.895323	0.263801	2.67661	0.802171		0.185439		-1.44784	0.788136	0.579092
Q10NY2	9.09666	9.00253	11.6035	10.2073	10.1448	9.08337	3	3	6			0.412539	-0.0623533	2.69056	0.865821	0.244521	0.396279		0.757895						0.862191	-0.130143	5.60047	1.81677	0.493435	0.799597			0.862191	-0.130143	5.60047	1.81677	0.493435	0.799597		0.0973567		-1.07424	0.77264	0.585345
Q10N04	8.60877	6.07895	8.67267	10.5483	9.12719	9.08255	3	3	6			-0.075351	-2.98594	-0.240251	1.2069	-0.77307	0.395454		-0.412042						-0.157481	-6.23221	-0.500087	2.53247	-1.56003	0.797933			-0.157481	-6.23221	-0.500087	2.53247	-1.56003	0.797933		0.531906		2.88672	1.84833	0.277713
Q0IQA5	8.42819	9.36761	9.43534	6.52824	6.71163	9.07996	3	3	6			-0.255931	0.302724	0.522413	-2.81319	-3.18863	0.392871		-0.839958						-0.534885	0.631842	1.08741	-5.90298	-6.43456	0.79272			-0.534885	0.631842	1.08741	-5.90298	-6.43456	0.79272		0.0827315		-4.24306	2.75076	0.148573
O56834	11.0858	10.5581	8.28174	12.091	11.4946	9.07951	3	3	6			2.40168	1.49325	-0.631179	2.74954	1.59429	0.392417		1.33333						5.01942	3.11669	-1.31381	5.7694	3.21723	0.791805			5.01942	3.11669	-1.31381	5.7694	3.21723	0.791805		0.739519		0.98538	0.518458	0.698118
Q6VMN7	8.46316	10.3565	6.64056	8.25087	5.08087	9.07919	3	3	6			-0.220967	1.29156	-2.27236	-1.09057	-4.81939	0.392097		-1.11994						-0.461812	2.69574	-4.72997	-2.28836	-9.72538	0.791159			-0.461812	2.69574	-4.72997	-2.28836	-9.72538	0.791159		0.644162		-2.90885	1.04184	0.485708
B8B0I8	9.43425	10.1226	6.24367	5.93988	7.59567	9.07903	3	3	6			0.75013	1.05768	-2.66925	-3.40155	-2.3046	0.391937		-1.02928						1.56774	2.20758	-5.55611	-7.13754	-4.6506	0.790836			1.56774	2.20758	-5.55611	-7.13754	-4.6506	0.790836		0.939167		-3.07217	1.25374	0.419358
Q6YVY0	8.77926	9.56853	11.5576	9.34403	9.86539	9.07855	3	3	6			0.0951365	0.503639	2.64464	0.00259234	-0.034872	0.391457		0.600432						0.198832	1.05119	5.50487	0.00543955	-0.0703705	0.789867			0.198832	1.05119	5.50487	0.00543955	-0.0703705	0.789867		0.0543598		-2.00998	1.76319	0.294595
Q0DVU4	9.19591	6.0674	9.41003	9.40812	11.3556	9.07831	3	3	6			0.51179	-2.99749	0.497104	0.0666802	1.45531	0.391217		-0.0125646						1.06962	-6.25631	1.03473	0.139916	2.93676	0.789383			1.06962	-6.25631	1.03473	0.139916	2.93676	0.789383		0.21482		2.67267	1.47986	0.358523
Q6F388	10.0857	9.34525	5.83491	11.2434	14.9433	9.07818	3	3	6			1.40161	0.280363	-3.07801	1.90192	5.04307	0.391083		0.990007						2.92932	0.58517	-6.40694	3.99083	10.1768	0.789114			2.92932	0.58517	-6.40694	3.99083	10.1768	0.789114		0.982365		5.94972	2.28821	0.20473
Q942X8	7.94691	9.89262	10.4234	10.6349	11.3301	9.07743	3	3	6			-0.737217	0.827732	1.51051	1.29346	1.42981	0.390336		0.785772						-1.54076	1.72763	3.14415	2.7141	2.88531	0.787605			-1.54076	1.72763	3.14415	2.7141	2.88531	0.787605		0.380617		1.01866	0.876012	0.544871
Q5Z5R7	4.11578	11.4349	7.62987	8.37339	9.71983	9.0774	3	3	6			-4.56834	2.37005	-1.28306	-0.96805	-0.180431	0.390309		-0.706586						-9.54766	4.94675	-2.67071	-2.03128	-0.364104	0.787551			-9.54766	4.94675	-2.67071	-2.03128	-0.364104	0.787551		0.073607		1.88793	0.554458	0.680913
Q5WA72	8.64313	10.2416	9.43923	8.67426	9.07658	9.07492	3	3	6			-0.0409886	1.17674	0.526305	-0.667174	-0.82369	0.387823		0.093169						-0.0856646	2.45607	1.09551	-1.39994	-1.66218	0.782536			-0.0856646	2.45607	1.09551	-1.39994	-1.66218	0.782536		0.94629		-1.91517	2.7634	0.147276
Q5CCK3	9.26454	9.6446	9.23033	10.6378	9.36554	9.07411	3	3	6			0.580413	0.579708	0.317409	1.29637	-0.53473	0.387021		0.437698						1.21304	1.20996	0.660694	2.72019	-1.07907	0.780916			1.21304	1.20996	0.660694	2.72019	-1.07907	0.780916		0.0545149		-0.220553	0.230289	0.852464
P0DO10	9.97957	11.4071	10.0857	10.275	11.9331	9.07264	3	3	6			1.29544	2.34217	1.17281	0.933523	2.03284	0.385548		1.36039						2.70743	4.88854	2.44124	1.95883	4.1022	0.777944			2.70743	4.88854	2.44124	1.95883	4.1022	0.777944		0.776651		-1.06608	1.18517	0.439772
Q6Z0Q9	7.85835	8.82505	9.12642	7.57372	7.47962	9.07047	3	3	6			-0.825769	-0.239833	0.213497	-1.76771	-2.42065	0.383376		-0.776182						-1.72583	-0.500576	0.444399	-3.70923	-4.88479	0.773561			-1.72583	-0.500576	0.444399	-3.70923	-4.88479	0.773561		0.234465		-2.01282	1.58103	0.334244
Q6YWK8	6.38471	9.20967	10.9898	8.53613	11.4987	9.06864	3	3	6			-2.29942	0.144786	2.0769	-0.805307	1.59848	0.38155		0.182832						-4.80569	0.302195	4.3231	-1.68979	3.22569	0.769877			-4.80569	0.302195	4.3231	-1.68979	3.22569	0.769877		0.447897		0.828724	0.329254	0.795948
Q7XR88	7.36484	9.20129	9.71593	10.4858	11.683	9.06851	3	3	6			-1.31929	0.136404	0.803004	1.14439	1.78269	0.381416		0.488102						-2.75726	0.2847	1.67147	2.4013	3.5974	0.769606			-2.75726	0.2847	1.67147	2.4013	3.5974	0.769606		0.563879		2.52313	2.49458	0.177442
A3C4H3	10.5751	9.07812	8.77459	9.62706	6.81481	9.06776	3	3	6			1.89094	0.013237	-0.138334	0.285622	-3.08546	0.380663		-0.108888						3.952	0.0276281	-0.287945	0.599327	-6.22635	0.768087			3.952	0.0276281	-0.287945	0.599327	-6.22635	0.768087		0.518957		-2.85021	1.52677	0.347053
C7J6G6	10.6012	9.36669	9.76714	13.1548	11.4574	9.0642	3	3	6			1.91709	0.301807	0.854218	3.81337	1.55717	0.37711		1.47013						4.00665	0.629927	1.77807	8.00166	3.14231	0.760918			4.00665	0.629927	1.77807	8.00166	3.14231	0.760918		0.355877		1.83008	1.06007	0.47961
Q652U9	11.4991	11.672	7.88941	11.1391	8.65098	9.0604	3	3	6			2.81503	2.60714	-1.02351	1.79767	-1.24929	0.373305		0.886723						5.88329	5.44159	-2.13046	3.77208	-2.52102	0.75324			5.88329	5.44159	-2.13046	3.77208	-2.52102	0.75324		0.656081		-2.39671	1.02314	0.492043
Q0JQ12	11.3675	10.5573	8.12143	10.7073	10.9852	9.05953	3	3	6			2.6834	1.49239	-0.791494	1.36584	1.08494	0.37244		1.03458						5.6082	3.11489	-1.64751	2.86596	2.18937	0.751495			5.6082	3.11489	-1.64751	2.86596	2.18937	0.751495		0.158037		-0.42292	0.220857	0.858056
Q84YK7	8.46213	8.66288	8.33387	9.56881	10.1165	9.05675	3	3	6			-0.221989	-0.402005	-0.579053	0.227374	0.216209	0.369652		-0.0649686						-0.463949	-0.83906	-1.20531	0.477103	0.436303	0.74587			-0.463949	-0.83906	-1.20531	0.477103	0.436303	0.74587		0.341446		1.3892	7.9299	0.00410073
Q7XA83	9.12345	9.94805	9.62005	8.35557	10.2662	9.05387	3	3	6			0.439326	0.883159	0.707131	-0.985866	0.365936	0.366778		0.296077						0.918174	1.84332	1.47191	-2.06866	0.738447	0.74007			0.918174	1.84332	1.47191	-2.06866	0.738447	0.74007		0.152374		-1.60785	2.52232	0.174062
Q0DLB9	10.8545	9.44909	9.17108	10.0871	10.9196	9.05284	3	3	6			2.17036	0.3842	0.258153	0.745628	1.01934	0.365746		0.823904						4.53596	0.801897	0.537351	1.56457	2.057	0.737988			4.53596	0.801897	0.537351	1.56457	2.057	0.737988		0.16319		-0.505218	0.460604	0.726682
Q7XL03	9.7544	11.7506	9.93575	9.24835	10.6927	9.04813	3	3	6			1.07028	2.68569	1.02283	-0.0930826	0.792438	0.361039		0.9732						2.23684	5.60555	2.12904	-0.195317	1.59911	0.72849			2.23684	5.60555	2.12904	-0.195317	1.59911	0.72849		0.341715		-2.61305	3.24539	0.105448
Q94CT7	10.0717	10.3541	4.72312	9.54224	9.58569	9.04505	3	3	6			1.38761	1.28925	-4.1898	0.200801	-0.31457	0.357956		-0.211459						2.90005	2.69091	-8.72116	0.421346	-0.634792	0.72227			2.90005	2.69091	-8.72116	0.421346	-0.634792	0.72227		0.0227111		1.21301	0.353725	0.782561
Q85437	8.54601	10.6341	8.61993	11.926	11.3195	9.04418	3	3	6			-0.138116	1.5692	-0.292997	2.5846	1.41924	0.357081		0.916501						-0.288658	3.27521	-0.609879	5.42331	2.86398	0.720506			-0.288658	3.27521	-0.609879	5.42331	2.86398	0.720506		0.912314		2.21037	1.75317	0.29665
Q53KS9	13.9168	10.3258	7.58782	7.05539	11.8152	9.04404	3	3	6			5.23269	1.26087	-1.32511	-2.28605	1.91496	0.356945		0.859051						10.9361	2.63167	-2.75824	-4.79686	3.86432	0.72023			10.9361	2.63167	-2.75824	-4.79686	3.86432	0.72023		0.575417		-3.67395	1.05962	0.479758
Q5SMQ0	10.5994	6.52533	9.47005	8.90075	9.77864	9.04212	3	3	6			1.91532	-2.53955	0.557125	-0.440691	-0.121629	0.35503		-0.0457324						4.00296	-5.30053	1.15967	-0.924711	-0.245444	0.716367			4.00296	-5.30053	1.15967	-0.924711	-0.245444	0.716367		0.0580924		-0.105295	0.0413614	0.971738
P92941	5.90521	8.17438	9.28072	10.6333	8.94468	9.03919	3	3	6			-2.77892	-0.890511	0.367801	1.29183	-0.955582	0.352099		-0.435547						-5.80783	-1.85866	0.765585	2.71067	-1.92833	0.710453			-5.80783	-1.85866	0.765585	2.71067	-1.92833	0.710453		0.661754		2.7979	1.75127	0.297041
Q5N6V8	8.94895	6.83529	11.5152	10.1981	8.1443	9.03757	3	3	6			0.264828	-2.22959	2.60223	0.856639	-1.75596	0.35048		0.0147706						0.55348	-4.65358	5.41661	1.7975	-3.54348	0.707186			0.55348	-4.65358	5.41661	1.7975	-3.54348	0.707186		0.477937		-0.785097	0.276929	0.825346
Q652A8	10.5761	8.50589	9.57526	11.9702	9.40316	9.03724	3	3	6			1.89198	-0.558996	0.662332	2.62881	-0.497104	0.350151		0.746196						3.95417	-1.16673	1.37866	5.51609	-1.00314	0.706521			3.95417	-1.16673	1.37866	5.51609	-1.00314	0.706521		0.729178		0.351123	0.163437	0.892895
Q8L4E7	10.1081	9.74631	11.2836	10.576	10.9422	9.03447	3	3	6			1.42401	0.681426	2.37063	1.23457	1.04196	0.347375		1.18333						2.97612	1.42226	4.93451	2.59053	2.10263	0.70092			2.97612	1.42226	4.93451	2.59053	2.10263	0.70092		0.47403		-1.31294	1.63414	0.322162
Q5VRH9	9.13353	9.73704	10.0312	10.6698	10.1126	9.03307	3	3	6			0.449404	0.672157	1.1183	1.32833	0.212305	0.345971		0.687744						0.939238	1.40292	2.32776	2.78727	0.428424	0.698087			0.939238	1.40292	2.32776	2.78727	0.428424	0.698087		0.461283		-0.252044	0.355593	0.781548
Q0J8Q3	9.33152	10.8175	7.52199	9.50522	9.49526	9.03238	3	3	6			0.647398	1.75266	-1.39093	0.163779	-0.40501	0.345282		0.185529						1.35304	3.65812	-2.89525	0.34366	-0.817296	0.696698			1.35304	3.65812	-2.89525	0.34366	-0.817296	0.696698		0.107449		-0.630949	0.386207	0.765138
Q2NNE0	10.0329	8.90518	9.17565	9.45757	11.3319	9.0255	3	3	6			1.34875	-0.159711	0.262726	0.116128	1.43166	0.338405		0.556326						2.81883	-0.333346	0.546869	0.243674	2.88904	0.682822			2.81883	-0.333346	0.546869	0.243674	2.88904	0.682822		0.863428		0.261061	0.24427	0.844243
A2XD35	9.90456	9.5533	7.85692	8.58146	10.1053	9.02542	3	3	6			1.22044	0.488416	-1.056	-0.759973	0.204989	0.338322		0.0726984						2.55066	1.01942	-2.19809	-1.59467	0.413661	0.682654			2.55066	1.01942	-2.19809	-1.59467	0.413661	0.682654		0.417243		-0.623448	0.489867	0.712091
Q6YYX9	10.4953	10.1865	10.2919	7.8339	8.66952	9.02533	3	3	6			1.81113	1.1216	1.37894	-1.50754	-1.23074	0.338239		0.318605						3.7852	2.34099	2.87029	-3.16329	-2.4836	0.682487			3.7852	2.34099	2.87029	-3.16329	-2.4836	0.682487		0.224935		-4.65362	5.58442	0.0208411
Q7XEK4	12.7123	13.2285	9.33248	10.6095	13.1132	9.02531	3	3	6			4.02819	4.16363	0.419561	1.26802	3.21297	0.338212		2.23843						8.41876	8.69028	0.873324	2.66071	6.48367	0.682431			8.41876	8.69028	0.873324	2.66071	6.48367	0.682431		0.612854		-2.71852	1.22866	0.426713
Q5Z980	9.07334	9.73584	7.09455	10.8033	11.8539	9.02525	3	3	6			0.389215	0.670957	-1.81837	1.46189	1.95363	0.338156		0.499246						0.813444	1.40041	-3.78498	3.06751	3.94236	0.682319			0.813444	1.40041	-3.78498	3.06751	3.94236	0.682319		0.521912		3.08777	2.46813	0.180725
Q651U1	10.399	9.26153	9.02984	9.25018	8.88121	9.02483	3	3	6			1.71483	0.196644	0.116916	-0.0912572	-1.01906	0.337741		0.209303						3.58394	0.410432	0.243363	-0.191487	-2.05643	0.681481			3.58394	0.410432	0.243363	-0.191487	-2.05643	0.681481		0.7114		-1.93472	2.14427	0.22621
Q851J8	9.32704	8.94656	10.1152	10.0557	10.2847	9.02342	3	3	6			0.642913	-0.118332	1.20225	0.714252	0.384443	0.336328		0.526976						1.34366	-0.24698	2.50251	1.49873	0.775794	0.678629			1.34366	-0.24698	2.50251	1.49873	0.775794	0.678629		0.190646		-0.215347	0.30427	0.809852
Q6H874	7.6319	8.95983	8.06016	10.1036	7.19426	9.02267	3	3	6			-1.05222	-0.105059	-0.852768	0.762113	-2.706	0.335579		-0.603059						-2.1991	-0.219278	-1.77505	1.59916	-5.46062	0.677119			-2.1991	-0.219278	-1.77505	1.59916	-5.46062	0.677119		0.137432		0.336361	0.167133	0.890611
Q2R4Z4	6.87958	6.89567	7.76832	5.50153	8.9991	9.02067	3	3	6			-1.80454	-2.16922	-1.14461	-3.8399	-0.901167	0.33358		-1.58764						-3.77142	-4.52757	-2.38252	-8.05734	-1.81853	0.673086			-3.77142	-4.52757	-2.38252	-8.05734	-1.81853	0.673086		0.110578		0.492911	0.213259	0.862587
Q6Z746	9.80339	10.3633	9.78896	9.65369	11.5406	9.0192	3	3	6			1.11927	1.29837	0.87604	0.31225	1.64035	0.332107		0.92973						2.33922	2.70995	1.82349	0.6552	3.31017	0.670114			2.33922	2.70995	1.82349	0.6552	3.31017	0.670114		0.15639		-0.745727	1.11181	0.462712
Q8L4D8	6.87406	9.51288	8.19707	8.49653	9.64978	9.01728	3	3	6			-1.81006	0.447992	-0.715854	-0.844903	-0.250488	0.330188		-0.473855						-3.78296	0.935043	-1.49007	-1.77288	-0.505476	0.66624			-3.78296	0.935043	-1.49007	-1.77288	-0.505476	0.66624		0.421886		0.908625	0.772588	0.585366
Q6IEQ7	10.2215	7.36571	8.84527	9.3427	9.79139	9.01714	3	3	6			1.53734	-1.69918	-0.067653	0.00125976	-0.108874	0.330048		-0.0011755						3.21299	-3.5465	-0.140821	0.00264337	-0.219705	0.665959			3.21299	-3.5465	-0.140821	0.00264337	-0.219705	0.665959		0.0364935		0.307744	0.168586	0.889714
Q8L7J2	7.33154	11.4644	8.27491	9.22482	9.54944	9.01569	3	3	6			-1.35258	2.39956	-0.63801	-0.116616	-0.350827	0.3286		0.0450209						-2.82684	5.00833	-1.32803	-0.244697	-0.707957	0.663036			-2.82684	5.00833	-1.32803	-0.244697	-0.707957	0.663036		0.0546974		-0.381024	0.179148	0.883224
Q2QXC6	9.12928	9.65764	10.1304	9.73317	6.56849	9.01357	3	3	6			0.44516	0.592753	1.21752	0.391731	-3.33178	0.32648		-0.0596892						0.930367	1.23719	2.53429	0.821976	-6.72342	0.658759			0.930367	1.23719	2.53429	0.821976	-6.72342	0.658759		0.075112		-3.31484	1.9361	0.261323
Q6ZIK0	6.54509	10.543	4.25066	5.69914	5.7255	9.01268	3	3	6			-2.13904	1.47814	-4.66227	-3.6423	-4.17477	0.325586		-2.13577						-4.4705	3.08517	-9.7046	-7.64271	-8.42455	0.656956			-4.4705	3.08517	-9.7046	-7.64271	-8.42455	0.656956		0.759787		-1.44012	0.367295	0.775235
P52428	7.78999	5.09204	7.06544	9.3721	8.63281	9.01181	3	3	6			-0.894133	-3.97285	-1.84748	0.0306661	-1.26745	0.32472		-1.27109						-1.8687	-8.29208	-3.84557	0.0643472	-2.55768	0.655208			-1.8687	-8.29208	-3.84557	0.0643472	-2.55768	0.655208		0.425448		4.05608	2.93203	0.13103
P93771	9.26882	8.38487	9.65478	10.4225	9.47822	9.0093	3	3	6			0.584699	-0.680017	0.741856	1.08105	-0.422041	0.322203		0.271291						1.222	-1.41932	1.54419	2.26838	-0.851666	0.650129			1.222	-1.41932	1.54419	2.26838	-0.851666	0.650129		0.958849		0.239994	0.213184	0.862631
O22243	11.0793	11.3807	10.7895	11.124	10.6134	9.00832	3	3	6			2.39516	2.31584	1.87661	1.78255	0.713156	0.321223		1.56742						5.0058	4.8336	3.9062	3.74037	1.43913	0.648151			5.0058	4.8336	3.9062	3.74037	1.43913	0.648151		0.238747		-2.63932	4.1642	0.0557765
Q8GU88	8.9693	10.209	11.1006	11.9101	10.5452	9.0072	3	3	6			0.285177	1.14408	2.18767	2.56868	0.644893	0.320101		1.19177						0.596009	2.38791	4.55369	5.38991	1.30137	0.645889			0.596009	2.38791	4.55369	5.38991	1.30137	0.645889		0.745527		-0.0668101	0.039089	0.973269
Q5SNN4	9.92727	9.57429	9.59401	10.4251	10.1009	9.0072	3	3	6			1.24315	0.509404	0.681084	1.08367	0.20066	0.320101		0.673012						2.59814	1.06322	1.41769	2.27389	0.404926	0.645889			2.59814	1.06322	1.41769	2.27389	0.404926	0.645889		0.769125		-0.584781	1.06451	0.478136
P22472	7.67871	9.86398	7.42358	8.54936	14.6698	9.007	3	3	6			-1.00542	0.799098	-1.48935	-0.792076	4.76956	0.319905		0.433621						-2.10128	1.66787	-3.1001	-1.66203	9.62482	0.645493			-2.10128	1.66787	-3.1001	-1.66203	9.62482	0.645493		0.301951		4.04727	1.55791	0.339642
Q53N87	11.3834	7.88972	3.98659	8.23778	9.63365	9.00658	3	3	6			2.69931	-1.17517	-4.92633	-1.10365	-0.266616	0.319485		-0.742162						5.64146	-2.4528	-10.2543	-2.31582	-0.538022	0.644644			5.64146	-2.4528	-10.2543	-2.31582	-0.538022	0.644644		0.0679121		1.6188	0.422223	0.746274
Q84SL0	10.7063	11.1795	10.4767	10.88	9.11471	9.00557	3	3	6			2.0222	2.11465	1.56382	1.53853	-0.78556	0.318474		1.12869						4.22632	4.41367	3.25513	3.22832	-1.58523	0.642606			4.22632	4.41367	3.25513	3.22832	-1.58523	0.642606		0.124961		-3.20314	3.48007	0.0896181
Q0DLG0	9.80033	9.85303	8.10024	10.7801	11.0901	9.00523	3	3	6			1.11621	0.788142	-0.812682	1.43869	1.18985	0.318138		0.673058						2.33284	1.645	-1.69161	3.01884	2.40107	0.641926			2.33284	1.645	-1.69161	3.01884	2.40107	0.641926		0.494252		1.25854	1.22029	0.429198
Q5QN75	9.25668	3.3251	7.40998	2.66123	6.84197	9.0043	3	3	6			0.572557	-5.73979	-1.50294	-6.68021	-3.05829	0.317211		-2.68191						1.19662	-11.98	-3.1284	-14.0172	-6.17153	0.640056			1.19662	-11.98	-3.1284	-14.0172	-6.17153	0.640056		0.912199		-1.87897	0.396117	0.759901
Q53M52	9.23848	11.4805	8.44348	11.1829	10.5563	9.00048	3	3	6			0.554353	2.41565	-0.469441	1.84145	0.656049	0.313385		0.885242						1.15858	5.04192	-0.977152	3.86396	1.32389	0.632336			1.15858	5.04192	-0.977152	3.86396	1.32389	0.632336		0.4744		0.198946	0.110634	0.926181
Q6K908	8.96209	11.7179	9.39795	11.7535	10.2746	8.9982	3	3	6			0.277963	2.65305	0.485029	2.41203	0.374346	0.311101		1.08559						0.580932	5.53741	1.0096	5.06121	0.755418	0.627729			0.580932	5.53741	1.0096	5.06121	0.755418	0.627729		0.915657		-0.22786	0.119006	0.920822
Q00058	8.90216	10.2795	8.3587	11.4891	13.2588	8.99554	3	3	6			0.218041	1.21461	-0.554228	2.14766	3.35858	0.308447		1.11552						0.455697	2.53511	-1.15364	4.50647	6.77751	0.622373			0.455697	2.53511	-1.15364	4.50647	6.77751	0.622373		0.521824		3.35639	2.44523	0.183617
B8B406	9.00554	9.43792	11.4426	11.5428	12.4716	8.99294	3	3	6			0.321417	0.373031	2.52966	2.20135	2.57131	0.305844		1.38377						0.671749	0.778587	5.26553	4.61914	5.18882	0.617121			0.671749	0.778587	5.26553	4.61914	5.18882	0.617121		0.948962		1.2364	0.771935	0.585631
Q0D519	10.3111	9.22786	10.8953	9.52984	12.1653	8.98954	3	3	6			1.62694	0.162969	1.98235	0.188403	2.26499	0.302442		1.08802						3.40025	0.340148	4.1263	0.39533	4.57067	0.610257			3.40025	0.340148	4.1263	0.39533	4.57067	0.610257		0.844257		-0.76348	0.533297	0.690974
Q6ATG6	12.3581	10.1056	7.65406	4.76256	10.9198	8.9892	3	3	6			3.67398	1.04076	-1.25886	-4.57888	1.01949	0.302102		0.0330993						7.67847	2.17226	-2.62034	-9.60794	2.0573	0.60957			7.67847	2.17226	-2.62034	-9.60794	2.0573	0.60957		0.79295		-4.72382	1.41873	0.374042
Q9LDN2	6.2247	4.25754	5.54597	7.8098	8.59276	8.98652	3	3	6			-2.45943	-4.80735	-3.36696	-1.53164	-1.30751	0.299431		-2.19557						-5.14011	-10.0338	-7.00839	-3.21386	-2.63851	0.60418			-5.14011	-10.0338	-7.00839	-3.21386	-2.63851	0.60418		0.819903		5.64471	4.70418	0.038362
B9G434	11.8858	10.02	9.71134	8.17408	11.0915	8.98459	3	3	6			3.20173	0.955121	0.798417	-1.16736	1.19124	0.297495		0.879439						6.69148	1.99352	1.66192	-2.4495	2.40388	0.600275			6.69148	1.99352	1.66192	-2.4495	2.40388	0.600275		0.863997		-3.26409	2.29042	0.204416
Q7FAE1	10.5217	7.40446	2.88823	7.1102	9.44865	8.98419	3	3	6			1.83758	-1.66043	-6.0247	-2.23124	-0.451612	0.297097		-1.37222						3.84046	-3.46562	-12.5405	-4.68186	-0.911338	0.59947			3.84046	-3.46562	-12.5405	-4.68186	-0.911338	0.59947		0.197974		2.39066	0.606079	0.65698
Q8RXR2	4.84704	10.0242	9.81154	10.3181	11.2147	8.98388	3	3	6			-3.83708	0.959283	0.898612	0.976654	1.31442	0.296783		0.101445						-8.01935	2.0022	1.87048	2.04933	2.65245	0.598838			-8.01935	2.0022	1.87048	2.04933	2.65245	0.598838		0.065238		3.1491	1.30931	0.403515
F7J0M4	8.25068	6.41095	8.4453	10.0591	9.37734	8.98234	3	3	6			-0.433446	-2.65394	-0.467619	0.717637	-0.522924	0.295244		-0.510841						-0.905885	-5.53926	-0.973359	1.50583	-1.05524	0.595731			-0.905885	-5.53926	-0.973359	1.50583	-1.05524	0.595731		0.385751		2.82161	2.52591	0.173631
Q60EH4	8.99746	10.5967	10.1897	9.63849	11.419	8.98188	3	3	6			0.313339	1.53186	1.27678	0.297053	1.51869	0.294787		0.872085						0.654866	3.19728	2.65764	0.623312	3.06468	0.59481			0.654866	3.19728	2.65764	0.623312	3.06468	0.59481		0.943266		-0.74233	0.873564	0.545797
A2XBL9	9.80242	11.3149	9.09104	10.2369	9.56136	8.98105	3	3	6			1.1183	2.24998	0.178115	0.895414	-0.338901	0.293959		0.732811						2.3372	4.69613	0.37075	1.87886	-0.683891	0.59314			2.3372	4.69613	0.37075	1.87886	-0.683891	0.59314		0.518615		-1.87199	1.90487	0.267041
Q2R9D2	9.02184	9.90014	8.50048	10.0323	10.1153	8.98068	3	3	6			0.337717	0.835255	-0.41244	0.690884	0.215039	0.293588		0.326674						0.705816	1.74333	-0.858503	1.4497	0.433941	0.592391			0.705816	1.74333	-0.858503	1.4497	0.433941	0.592391		0.29654		0.295127	0.440413	0.736924
Q84JI0	8.21485	10.9056	10.9194	9.88287	10.6839	8.97854	3	3	6			-0.46927	1.84073	2.00646	0.541435	0.783607	0.291445		0.832401						-0.980756	3.84194	4.17649	1.1361	1.58129	0.588066			-0.980756	3.84194	4.17649	1.1361	1.58129	0.588066		0.0577245		-1.24407	0.992368	0.502652
Q84LM2	10.4941	11.4659	8.25025	12.1696	11.7208	8.97387	3	3	6			1.80993	2.40099	-0.662672	2.82817	1.82058	0.286776		1.41396						3.78269	5.01131	-1.37937	5.93441	3.67387	0.578645			3.78269	5.01131	-1.37937	5.93441	3.67387	0.578645		0.771986		0.924098	0.453551	0.730243
Q6YXT7	7.10245	4.43343	7.00753	8.59033	8.69884	8.97321	3	3	6			-1.58168	-4.63146	-1.90539	-0.751112	-1.20142	0.286115		-1.63082						-3.30564	-9.66673	-3.96611	-1.57607	-2.42443	0.577313			-3.30564	-9.66673	-3.96611	-1.57607	-2.42443	0.577313		0.327407		4.5051	3.1725	0.110913
Q9LSW9	10.0873	10.3679	10.8266	10.0474	10.9709	8.97307	3	3	6			1.40321	1.30296	1.9137	0.705959	1.07063	0.285972		1.11374						2.93265	2.71953	3.98342	1.48133	2.1605	0.577023			2.93265	2.71953	3.98342	1.48133	2.1605	0.577023		0.840893		-1.80558	4.64166	0.0400609
Q9LYP2	10.078	9.60157	10.9524	8.55424	10.6016	8.97016	3	3	6			1.39389	0.536679	2.03945	-0.787194	0.70132	0.283069		0.694537						2.91319	1.12015	4.24517	-1.65178	1.41524	0.571167			2.91319	1.12015	4.24517	-1.65178	1.41524	0.571167		0.989745		-2.64796	3.20067	0.108768
P29618	9.4889	12.0795	8.03612	9.79429	10.5258	8.96956	3	3	6			0.804781	3.01463	-0.876805	0.452849	0.625549	0.282465		0.717245						1.68196	6.2921	-1.82509	0.950221	1.26234	0.569948			1.68196	6.2921	-1.82509	0.950221	1.26234	0.569948		0.0144051		-1.12216	0.555145	0.680589
Q10PC5	10.5843	9.25967	9.59062	11.1374	10.6954	8.96901	3	3	6			1.90018	0.194786	0.677701	1.796	0.795137	0.281918		0.940954						3.97131	0.406554	1.41065	3.76859	1.60456	0.568844			3.97131	0.406554	1.41065	3.76859	1.60456	0.568844		0.882025		0.0511606	0.039525	0.972975
Q9FTT3	9.56552	9.34913	9.16355	6.08481	10.033	8.96844	3	3	6			0.881398	0.284239	0.250626	-3.25663	0.132745	0.281342		-0.237713						1.84209	0.593261	0.521682	-6.83345	0.267875	0.567682			1.84209	0.593261	0.521682	-6.83345	0.267875	0.567682		0.0609218		-2.98497	1.7804	0.291104
P29250	8.36741	12.4174	8.50847	8.0493	10.4025	8.96723	3	3	6			-0.316709	3.35252	-0.404455	-1.29213	0.502214	0.280132		0.353594						-0.661909	6.99733	-0.841882	-2.71131	1.01345	0.56524			-0.661909	6.99733	-0.841882	-2.71131	1.01345	0.56524		0.342308		-2.20872	1.05932	0.479857
Q2QYE1	5.94507	7.47492	5.48052	11.2431	8.79468	8.96702	3	3	6			-2.73905	-1.58996	-3.4324	1.90162	-1.10559	0.27993		-1.11424						-5.72452	-3.31855	-7.14461	3.9902	-2.23104	0.564833			-5.72452	-3.31855	-7.14461	3.9902	-2.23104	0.564833		0.556248		6.17056	4.5231	0.0434921
Q2R3B4	6.25648	9.78766	9.34114	6.55603	6.79805	8.96492	3	3	6			-2.42764	0.722771	0.428217	-2.78541	-3.10221	0.277824		-1.14774						-5.07368	1.50856	0.891343	-5.84467	-6.26017	0.560584			-5.07368	1.50856	0.891343	-5.84467	-6.26017	0.560584		0.949498		-2.95683	1.37086	0.38666
Q653F4	9.79476	7.80832	11.0578	8.20384	6.92065	8.9629	3	3	6			1.11063	-1.25657	2.14487	-1.1376	-2.97961	0.275802		-0.30708						2.32118	-2.62269	4.46458	-2.38705	-6.01277	0.556503			2.32118	-2.62269	4.46458	-2.38705	-6.01277	0.556503		0.900854		-4.00213	2.11839	0.230303
Q0DEB8	6.13519	9.95887	7.18239	6.89567	12.7244	8.96113	3	3	6			-2.54894	0.893985	-1.73053	-2.44577	2.82416	0.274037		-0.455509						-5.32718	1.86591	-3.60213	-5.13201	5.69907	0.552942			-5.32718	1.86591	-3.60213	-5.13201	5.69907	0.552942		0.649071		2.7278	0.962508	0.513164
Q53WK4	8.45113	8.88084	9.86002	11.3395	10.2537	8.95925	3	3	6			-0.232995	-0.184049	0.947093	1.99802	0.353464	0.272155		0.525615						-0.48695	-0.384144	1.97139	4.19249	0.71328	0.549143			-0.48695	-0.384144	1.97139	4.19249	0.71328	0.549143		0.627024		1.45154	1.43969	0.368648
Q6L5F7	9.91376	10.2831	9.57384	8.97126	12.5684	8.9587	3	3	6			1.22963	1.2182	0.660913	-0.370181	2.66817	0.271604		0.946389						2.56989	2.54261	1.3757	-0.776758	5.38427	0.548032			2.56989	2.54261	1.3757	-0.776758	5.38427	0.548032		0.0846396		-0.44422	0.272655	0.827795
Q6H7S2	9.83838	11.4928	10.8231	9.16022	13.4318	8.95516	3	3	6			1.15426	2.42787	1.9102	-0.181213	3.53149	0.268062		1.51845						2.41236	5.06742	3.97613	-0.380242	7.12644	0.540885			2.41236	5.06742	3.97613	-0.380242	7.12644	0.540885		0.192094		-1.38961	0.722587	0.60601
Q9SLY8	10.5849	9.85187	11.3399	10.7769	9.62772	8.95236	3	3	6			1.90075	0.786987	2.42698	1.43549	-0.272549	0.265269		1.09049						3.97248	1.64259	5.05181	3.01211	-0.549995	0.535249			3.97248	1.64259	5.05181	3.01211	-0.549995	0.535249		0.953292		-2.55651	2.69708	0.154204
Q33DK1	9.41035	10.1303	10.188	9.54539	9.95809	8.94989	3	3	6			0.726222	1.06543	1.27505	0.203952	0.0578237	0.262791		0.598544						1.51778	2.22374	2.65404	0.427957	0.116686	0.53025			1.51778	2.22374	2.65404	0.427957	0.116686	0.53025		0.247124		-1.77356	7.074	0.00742189
Q6K2E1	9.46952	7.5331	8.67221	8.57516	12.1852	8.94951	3	3	6			0.785396	-1.53179	-0.24071	-0.766276	2.28492	0.262412		0.132325						1.64145	-3.19714	-0.501044	-1.60789	4.61089	0.529485			1.64145	-3.19714	-0.501044	-1.60789	4.61089	0.529485		0.741217		1.86307	1.11014	0.463251
Q67V78	9.80274	7.7862	7.40114	9.75811	7.13083	8.94904	3	3	6			1.11862	-1.27868	-1.51179	0.416669	-2.76944	0.261945		-0.627112						2.33787	-2.66885	-3.14682	0.874305	-5.58863	0.528542			2.33787	-2.66885	-3.14682	0.874305	-5.58863	0.528542		0.822318		-0.235996	0.0963527	0.935395
Q6ENH4	8.51503	12.6444	9.47824	12.9546	10.737	8.94875	3	3	6			-0.169094	3.57951	0.56532	3.61314	0.836729	0.261653		1.44788						-0.353399	7.47111	1.17673	7.58152	1.68849	0.527953			-0.353399	7.47111	1.17673	7.58152	1.68849	0.527953		0.908175		0.501177	0.176939	0.884578
Q0DBW8	11.3802	9.82378	9.62077	8.18725	11.1352	8.94565	3	3	6			2.69607	0.758894	0.707846	-1.15418	1.23493	0.258555		0.750352						5.63468	1.58395	1.4734	-2.42185	2.49205	0.521702			5.63468	1.58395	1.4734	-2.42185	2.49205	0.521702		0.958025		-2.70004	2.03509	0.243993
Q0D5R3	4.66426	10.6133	7.80561	9.97384	10.4971	8.94556	3	3	6			-4.01987	1.54844	-1.10731	0.632404	0.596788	0.258467		-0.348513						-8.40137	3.23189	-2.30489	1.32698	1.2043	0.521525			-8.40137	3.23189	-2.30489	1.32698	1.2043	0.521525		0.0110629		3.50906	1.30068	0.405933
Q0D3D2	8.75091	7.00854	9.26644	9.16677	8.62998	8.94448	3	3	6			0.0667847	-2.05635	0.353512	-0.174672	-1.27029	0.257384		-0.470604						0.139577	-4.29198	0.735842	-0.366517	-2.5634	0.519339			0.139577	-4.29198	0.735842	-0.366517	-2.5634	0.519339		0.500578		0.335327	0.211492	0.863643
Q5PP28	10.6393	10.2416	9.21844	8.27291	9.49522	8.94298	3	3	6			1.95522	1.17674	0.305519	-1.06853	-0.40505	0.25589		0.369965						4.08633	2.45607	0.635944	-2.24211	-0.817377	0.516324			4.08633	2.45607	0.635944	-2.24211	-0.817377	0.516324		0.779535		-3.2405	3.96649	0.0639688
Q7XIM0	9.96679	10.8125	11.0459	10.0629	9.77264	8.94155	3	3	6			1.28267	1.74761	2.13297	0.721418	-0.127621	0.254453		1.00192						2.68073	3.64759	4.43983	1.51377	-0.257534	0.513425			2.68073	3.64759	4.43983	1.51377	-0.257534	0.513425		0.991938		-2.9995	6.1354	0.0142253
Q65XV8	7.48527	12.4645	10.4856	12.8199	11.8458	8.94075	3	3	6			-1.19886	3.39958	1.5727	3.47846	1.94554	0.25366		1.57518						-2.50557	7.09557	3.27362	7.29893	3.92603	0.511826			-2.50557	7.09557	3.27362	7.29893	3.92603	0.511826		0.660321		1.29106	0.465532	0.724204
Q6EQ60	7.76301	9.93752	6.22576	11.0444	10.5929	8.93755	3	3	6			-0.92111	0.872634	-2.68717	1.70296	0.692659	0.250456		-0.0149284						-1.92508	1.82135	-5.59339	3.57335	1.39776	0.505361			-1.92508	1.82135	-5.59339	3.57335	1.39776	0.505361		0.306779		3.72453	2.43733	0.184624
P29619	10.1658	10.5134	9.19	5.73235	6.64053	8.93667	3	3	6			1.48166	1.44854	0.277074	-3.60909	-3.25973	0.249573		-0.56866						3.09662	3.02338	0.576735	-7.57302	-6.57803	0.50358			3.09662	3.02338	0.576735	-7.57302	-6.57803	0.50358		0.191766		-6.7814	3.96006	0.0642545
Q6F332	6.47934	9.56199	9.13548	9.63773	9.63494	8.93572	3	3	6			-2.20478	0.497107	0.222555	0.296293	-0.265327	0.248631		-0.20092						-4.6079	1.03756	0.463253	0.621716	-0.535421	0.501678			-4.6079	1.03756	0.463253	0.621716	-0.535421	0.501678		0.0805		1.23169	0.894296	0.53801
Q8H2T0	7.36247	9.63648	6.42287	7.28216	9.49364	8.93387	3	3	6			-1.32165	0.571593	-2.49005	-2.05928	-0.40663	0.246774		-0.909874						-2.7622	1.19302	-5.18309	-4.32102	-0.820565	0.497931			-2.7622	1.19302	-5.18309	-4.32102	-0.820565	0.497931		0.748972		0.702875	0.358955	0.779729
Q69TB1	8.26294	8.74715	7.87701	6.07341	8.79399	8.9331	3	3	6			-0.421183	-0.317735	-1.03592	-3.26802	-1.10627	0.246006		-0.983854						-0.880256	-0.663172	-2.15628	-6.85736	-2.23242	0.496383			-0.880256	-0.663172	-2.15628	-6.85736	-2.23242	0.496383		0.0899515		-1.63123	1.00323	0.498882
Q6K973	9.26468	9.9511	10.5624	11.647	10.7283	8.93281	3	3	6			0.580554	0.886208	1.64951	2.30557	0.828081	0.245711		1.08261						1.21334	1.84968	3.43349	4.83783	1.67104	0.495787			1.21334	1.84968	3.43349	4.83783	1.67104	0.495787		0.411618		0.169381	0.131417	0.912935
Q336V5	10.7811	10.739	9.05436	10.1861	10.8338	8.93133	3	3	6			2.09699	1.67413	0.141437	0.844677	0.933495	0.244234		0.989161						4.38263	3.49423	0.294403	1.7724	1.88376	0.492807			4.38263	3.49423	0.294403	1.7724	1.88376	0.492807		0.228851		-1.34076	1.44635	0.366947
Q6Z6K9	12.3447	11.1542	9.72064	9.14797	8.8889	8.93086	3	3	6			3.66059	2.08936	0.807714	-0.193469	-1.01137	0.243762		0.932765						7.65049	4.36089	1.68127	-0.40596	-2.04091	0.491853			7.65049	4.36089	1.68127	-0.40596	-2.04091	0.491853		0.311489		-5.21589	4.32188	0.0500016
Q8H8T0	9.45129	11.4603	8.64245	10.413	11.2473	8.92582	3	3	6			0.76717	2.39542	-0.270475	1.07156	1.34707	0.238727		0.924911						1.60336	4.99968	-0.562999	2.24847	2.71834	0.481695			1.60336	4.99968	-0.562999	2.24847	2.71834	0.481695		0.300627		-0.197179	0.126559	0.916014
Q9AV88	10.8816	8.66676	10.617	10.4894	10.1891	8.92538	3	3	6			2.19745	-0.398131	1.70408	1.14801	0.288818	0.238282		0.863086						4.59259	-0.830973	3.54709	2.40889	0.582826	0.480797			4.59259	-0.830973	3.54709	2.40889	0.582826	0.480797		0.24895		-1.27873	0.967989	0.511218
Q2QYW5	10.2346	10.0031	2.97873	9.47861	7.96723	8.92466	3	3	6			1.55045	0.938209	-5.9342	0.137171	-1.93304	0.23757		-0.833972						3.24039	1.95822	-12.3522	0.287828	-3.90081	0.47936			3.24039	1.95822	-12.3522	0.287828	-3.90081	0.47936		0.151204		1.33997	0.305277	0.809287
Q8GYD9	10.6334	10.3661	10.4325	10.7404	11.4226	8.923	3	3	6			1.94924	1.30122	1.51962	1.39893	1.52233	0.235907		1.32121						4.07383	2.71588	3.16312	2.93541	3.072	0.476003			4.07383	2.71588	3.16312	2.93541	3.072	0.476003		0.366508		-1.15647	1.82085	0.283054
Q6YT98	5.57948	7.05691	8.42051	7.91205	5.27943	8.92062	3	3	6			-3.10464	-2.00798	-0.492416	-1.42939	-4.62083	0.233527		-1.90362						-6.48858	-4.19103	-1.02497	-2.99931	-9.32469	0.471202			-6.48858	-4.19103	-1.02497	-2.99931	-9.32469	0.471202		0.467507		-0.0494033	0.01641	0.98869
Q7Y0W5	8.59567	6.01042	8.89969	7.96093	6.87258	8.91925	3	3	6			-0.0884555	-3.05447	-0.0132342	-1.38051	-3.02768	0.232157		-1.22203						-0.184869	-6.37524	-0.0275473	-2.89675	-6.10976	0.468437			-0.184869	-6.37524	-0.0275473	-2.89675	-6.10976	0.468437		0.904443		-0.650139	0.27017	0.829222
A2WYI4	8.97548	10.689	10.9622	12.1786	12.1874	8.91609	3	3	6			0.291352	1.62415	2.04925	2.83713	2.28712	0.228994		1.553						0.608915	3.38991	4.26556	5.95321	4.61533	0.462056			0.608915	3.38991	4.26556	5.95321	4.61533	0.462056		0.615548		0.922074	0.584818	0.666733
Q6Z4A7	6.43939	10.8653	11.2517	9.08818	10.9629	8.91202	3	3	6			-2.24473	1.80046	2.33874	-0.253258	1.06263	0.224927		0.488127						-4.69141	3.7579	4.86813	-0.531417	2.14435	0.453849			-4.69141	3.7579	4.86813	-0.531417	2.14435	0.453849		0.125583		-0.622611	0.231973	0.85147
Q10MC0	6.38645	12.1043	10.24	11.1657	11.7	8.91103	3	3	6			-2.29767	3.03942	1.32703	1.82429	1.79978	0.223938		0.986131						-4.80205	6.34383	2.76225	3.82794	3.63191	0.451854			-4.80205	6.34383	2.76225	3.82794	3.63191	0.451854		0.199689		1.20256	0.422988	0.745878
Q84MM9	10.2685	9.15241	8.42597	10.2406	10.8672	8.91019	3	3	6			1.58442	0.0875245	-0.486952	0.899116	0.966937	0.223099		0.54569						3.31137	0.18268	-1.0136	1.88663	1.95125	0.450161			3.31137	0.18268	-1.0136	1.88663	1.95125	0.450161		0.252343		0.602529	0.546279	0.684784
Q7XE48	6.60995	10.8987	8.74275	11.313	11.2631	8.90872	3	3	6			-2.07418	1.83379	-0.170176	1.97156	1.36283	0.221629		0.524242						-4.33495	3.82746	-0.354225	4.13696	2.75014	0.447194			-4.33495	3.82746	-0.354225	4.13696	2.75014	0.447194		0.345056		2.732	1.51006	0.351097
Q0D4Z6	9.172	9.54901	11.3583	12.437	11.1328	8.90581	3	3	6			0.487879	0.484127	2.4454	3.09553	1.23256	0.218714		1.32737						1.01965	1.01046	5.09015	6.49542	2.48726	0.441313			1.01965	1.01046	5.09015	6.49542	2.48726	0.441313		0.737111		0.76791	0.417486	0.748728
Q6YXH8	5.79108	7.41633	6.96371	9.64985	6.1766	8.90192	3	3	6			-2.89304	-1.64855	-1.94922	0.308412	-3.72366	0.214829		-1.61521						-6.04634	-3.44084	-4.05734	0.647146	-7.51423	0.433473			-6.04634	-3.44084	-4.05734	0.647146	-7.51423	0.433473		0.157861		2.3703	1.16921	0.444666
P30287	5.88379	8.0773	8.69613	8.71112	9.09091	8.90063	3	3	6			-2.80033	-0.987591	-0.216791	-0.630321	-0.809359	0.213531		-0.87181						-5.85259	-2.06129	-0.451254	-1.32261	-1.63326	0.430855			-5.85259	-2.06129	-0.451254	-1.32261	-1.63326	0.430855		0.277447		1.9467	1.63378	0.322244
O80792	7.7709	10.2029	9.55336	8.80203	12.2254	8.89679	3	3	6			-0.913228	1.13797	0.640437	-0.539406	2.32509	0.209692		0.47676						-1.90861	2.37516	1.33308	-1.13185	4.69196	0.42311			-1.90861	2.37516	1.33308	-1.13185	4.69196	0.42311		0.708738		0.727865	0.407738	0.753804
Q0JC44	8.51605	11.4844	9.66359	9.83434	8.21752	8.89515	3	3	6			-0.168069	2.41948	0.75067	0.492907	-1.68274	0.208057		0.336718						-0.351257	5.04991	1.56254	1.03428	-3.39572	0.41981			-0.351257	5.04991	1.56254	1.03428	-3.39572	0.41981		0.868821		-2.73428	1.92538	0.263271
Q69MT2	8.28221	9.24391	10.7779	8.95041	11.0751	8.89421	3	3	6			-0.401915	0.179025	1.86499	-0.391027	1.17488	0.207117		0.438845						-0.839987	0.373658	3.88201	-0.8205	2.37087	0.417914			-0.839987	0.373658	3.88201	-0.8205	2.37087	0.417914		0.601904		-0.482467	0.340359	0.789845
Q7XKS9	9.27307	8.81871	8.10664	10.1841	11.9798	8.89357	3	3	6			0.58895	-0.246177	-0.806282	0.842694	2.07952	0.206481		0.444197						1.23088	-0.513818	-1.67829	1.76824	4.1964	0.416629			1.23088	-0.513818	-1.67829	1.76824	4.1964	0.416629		0.737727		2.4475	2.70365	0.153505
Q6L5H6	8.26711	7.42702	12.7815	11.0234	11.2011	8.89163	3	3	6			-0.417009	-1.63787	3.8686	1.68197	1.30082	0.204538		0.833508						-0.871533	-3.41854	8.05257	3.52931	2.62501	0.412709			-0.871533	-3.41854	8.05257	3.52931	2.62501	0.412709		0.132327		0.934842	0.307799	0.807873
Q501D2	9.03958	9.10085	9.29262	9.52421	9.69556	8.89011	3	3	6			0.355454	0.0359592	0.379697	0.182771	-0.204706	0.203018		0.158699						0.742885	0.0750535	0.790348	0.383513	-0.41309	0.409643			0.742885	0.0750535	0.790348	0.383513	-0.41309	0.409643		0.844963		-0.409407	1.6741	0.313361
Q10PZ6	9.90758	11.7669	12.0153	11.8224	11.4501	8.88914	3	3	6			1.22346	2.70197	3.10242	2.48097	1.54981	0.202045		1.87678						2.55698	5.63953	6.45776	5.20588	3.12747	0.407678			2.55698	5.63953	6.45776	5.20588	3.12747	0.407678		0.844462		-1.97108	1.54995	0.341522
Q0J6P7	10.1483	12.1944	10.9049	11.6173	11.526	8.88258	3	3	6			1.46423	3.12947	1.99194	2.27589	1.6257	0.195488		1.78045						3.06018	6.53179	4.14626	4.77555	3.2806	0.394448			3.06018	6.53179	4.14626	4.77555	3.2806	0.394448		0.777402		-1.76254	1.53873	0.344189
Q6H7D2	11.5738	9.28198	11.6523	10.823	9.99067	8.87903	3	3	6			2.88967	0.217089	2.73938	1.48153	0.0904063	0.191938		1.26834						6.03929	0.453106	5.70209	3.10873	0.182437	0.387285			6.03929	0.453106	5.70209	3.10873	0.182437	0.387285		0.427641		-2.83868	2.08074	0.236394
Q6ESR4	8.89754	8.91361	8.04587	10.228	10.6998	8.87885	3	3	6			0.21342	-0.15128	-0.867055	0.88654	0.799568	0.191754		0.178824						0.446039	-0.315749	-1.80479	1.86024	1.6135	0.386914			0.446039	-0.315749	-1.80479	1.86024	1.6135	0.386914		0.64416		1.84505	3.5892	0.0830889
D7UPN3	8.86378	9.73237	13.1523	7.12195	15.053	8.87802	3	3	6			0.17966	0.667484	4.23933	-2.21949	5.15273	0.190926		1.36844						0.375483	1.39316	8.82425	-4.6572	10.398	0.385244			0.375483	1.39316	8.82425	-4.6572	10.398	0.385244		0.531848		-1.48894	0.344809	0.787412
P27933	7.64933	7.85842	9.1393	11.0004	11.7162	8.87676	3	3	6			-1.0348	-1.20647	0.226372	1.65899	1.81595	0.189668		0.274952						-2.16268	-2.51813	0.471198	3.48108	3.66454	0.382706			-2.16268	-2.51813	0.471198	3.48108	3.66454	0.382706		0.879017		3.91265	4.28469	0.0513073
Q6ERX1	8.79074	10.0721	8.54462	8.76742	10.727	8.87661	3	3	6			0.106616	1.00725	-0.368307	-0.574014	0.826719	0.189515		0.197963						0.222824	2.10231	-0.766638	-1.20446	1.66829	0.382396			0.222824	2.10231	-0.766638	-1.20446	1.66829	0.382396		0.987365		-0.237424	0.23335	0.850657
Q657B3	8.84411	8.66786	9.09165	10.5157	8.95425	8.87437	3	3	6			0.159986	-0.39703	0.178723	1.17426	-0.946011	0.187273		0.059534						0.334365	-0.828677	0.372017	2.46398	-1.90902	0.377872			0.334365	-0.828677	0.372017	2.46398	-1.90902	0.377872		0.177505		0.351709	0.315658	0.803484
Q53LQ0	8.83958	9.04398	9.73144	11.6796	10.8485	8.87197	3	3	6			0.155458	-0.0209029	0.818514	2.33817	0.948201	0.184873		0.737387						0.324902	-0.0436283	1.70375	4.90624	1.91344	0.373029			0.324902	-0.0436283	1.70375	4.90624	1.91344	0.373029		0.275379		1.73589	1.77367	0.292464
Q943E9	8.08614	5.55805	9.30782	10.2871	9.06921	8.87184	3	3	6			-0.597987	-3.50683	0.394892	0.945698	-0.831057	0.18475		-0.568423						-1.24977	-7.31942	0.821976	1.98438	-1.67705	0.372781			-1.24977	-7.31942	0.821976	1.98438	-1.67705	0.372781		0.316643		2.80911	1.51071	0.35094
Q10GM4	8.1057	12.5392	10.7208	9.15353	12.7212	8.87132	3	3	6			-0.578424	3.47427	1.80783	-0.187911	2.82092	0.184226		1.25349						-1.20888	7.25146	3.76304	-0.394296	5.69252	0.371724			-1.20888	7.25146	3.76304	-0.394296	5.69252	0.371724		0.756215		-1.37856	0.554782	0.68076
Q8H7L6	8.19697	10.6652	7.47468	7.85854	12.3206	8.86962	3	3	6			-0.487152	1.60036	-1.43824	-1.4829	2.42037	0.182531		0.132494						-1.01813	3.34025	-2.99374	-3.11159	4.88422	0.368304			-1.01813	3.34025	-2.99374	-3.11159	4.88422	0.368304		0.790421		0.937516	0.379851	0.768517
Q5NB83	9.81014	10.6653	8.66028	8.34394	9.14995	8.8683	3	3	6			1.12601	1.60045	-0.252642	-0.997496	-0.750315	0.181204		0.151202						2.35333	3.34044	-0.52588	-2.09307	-1.51411	0.365626			2.35333	3.34044	-0.52588	-2.09307	-1.51411	0.365626		0.581003		-2.80315	3.16522	0.111474
Q7XI41	8.3052	8.98305	7.92695	5.19105	12.5389	8.86719	3	3	6			-0.378928	-0.0818365	-0.985975	-4.15039	2.63863	0.180092		-0.463068						-0.791945	-0.170808	-2.05233	-8.70884	5.32466	0.363383			-0.791945	-0.170808	-2.05233	-8.70884	5.32466	0.363383		0.0356495		-0.00190379	0.000470412	0.999674
[truncated: 2,710 more rows]
