# Supplementary material
Source: MDPI journal article supplement (https://www.mdpi.com/2073-4395/14/3/498)
Supplement: s1 [file s1 › Table S2 Proteomic analysis in the root sample.xlsx]

## Sheet: Sheet1
Protein IDs	Control_1	Control_2	Control_3	R3G3_1	R3G3_2	R3G3_3	Found in controls	Found in R3G3	Found in total		normalized_1	control 1	control 2	control 3	R3G3_1	R3G3_2	R3G3_3		Average norm		Slopes			normalized_2	control 1	control 2	control 3	R3G3_1	R3G3_2	R3G3_3		impute missing values	control 1	control 2	control 3	R3G3_1	R3G3_2	R3G3_3		F-test		log2(fold-change)	-log2(p-value)	p-value
A0A075F7E9	7.96786	7.7786	8.2529	10.2573	11.1658	9.70228	3	3	6			-1.26295	-0.872704	-0.939675	0.889422	1.97878	0.448074		0.0401576		control 1	0.46053			-2.74239	-1.81529	-1.85221	1.77993	3.99206	0.918355			-2.74239	-1.81529	-1.85221	1.77993	3.99206	0.918355		0.197563		4.36675	6.56127	0.0105892
A0A0N7KJT8	6.55989	9.09621	5.86688	8.33065	6.90207	9.46942	3	3	6			-2.67092	0.444907	-3.32569	-1.0372	-2.28493	0.215216		-1.4431		control 2	0.480752			-5.79967	0.925441	-6.55535	-2.07566	-4.6097	0.441097			-5.79967	0.925441	-6.55535	-2.07566	-4.6097	0.441097		0.546554		1.72844	0.813479	0.569008
A0A0P0UZP7	9.15061	9.50793	8.54199	7.83359	9.6674	10.3213	3	3	6			-0.0802021	0.856626	-0.65059	-1.53426	0.48039	1.06705		0.0231686		control 3	0.507326			-0.174152	1.78185	-1.28239	-3.07039	0.969157	2.18698			-0.174152	1.78185	-1.28239	-3.07039	0.969157	2.18698		0.482383		-0.0798534	0.0481461	0.967178
A0A0P0V4R0	12.18	11.3534	11.2343	13.6941	11.461	11.0469	3	3	6			2.94916	2.70212	2.0417	4.32629	2.27396	1.79265		2.68098		R3G3_1	0.499695			6.40384	5.62061	4.02444	8.65786	4.58757	3.67414			6.40384	5.62061	4.02444	8.65786	4.58757	3.67414		0.345571		0.29023	0.198337	0.871555
A0A0P0V5U9	9.76205	8.73742	9.82823	7.40369	9.26151	8.43308	3	3	6			0.531237	0.0861093	0.635655	-1.96415	0.0745023	-0.821118		-0.242961		R3G3_2	0.495679			1.15353	0.179114	1.25295	-3.9307	0.150304	-1.68293			1.15353	0.179114	1.25295	-3.9307	0.150304	-1.68293		0.155444		-2.68298	3.40523	0.0943893
A0A0P0VG31	12.0636	10.7249	10.2213	11.6279	11.4349	11.5266	3	3	6			2.83278	2.07363	1.02877	2.26005	2.24794	2.27239		2.11926		R3G3_3	0.48791			6.15114	4.31331	2.02783	4.52286	4.53507	4.65741			6.15114	4.31331	2.02783	4.52286	4.53507	4.65741		0.00259175		0.407683	0.386238	0.765122
A0A0P0VI36	10.1307	10.253	7.37764	10.0696	9.88333	8.9714	3	3	6			0.899887	1.60171	-1.81493	0.701736	0.696326	-0.282803		0.300321						1.95402	3.33168	-3.57745	1.40433	1.40479	-0.579621			1.95402	3.33168	-3.57745	1.40433	1.40479	-0.579621		0.178739		0.173747	0.0874641	0.941176
A0A0P0VIP0	10.8011	9.91365	10.2557	10.8937	11.5824	6.92801	3	3	6			1.57033	1.26235	1.06316	1.52583	2.39542	-2.32619		0.91515						3.40983	2.62577	2.09562	3.05353	4.8326	-4.76766			3.40983	2.62577	2.09562	3.05353	4.8326	-4.76766		0.0329677		-1.67092	0.668661	0.62909
A0A0P0VUY4	11.5959	10.5543	12.1252	12.5307	11.1706	11.1999	3	3	6			2.3651	1.90299	2.93261	3.16288	1.98361	1.94565		2.38214						5.1356	3.95837	5.78053	6.32961	4.0018	3.98773			5.1356	3.95837	5.78053	6.32961	4.0018	3.98773		0.639247		-0.185119	0.227653	0.854023
A0A0P0WFC8	10.4925	9.1519	7.33405	8.55846	8.38828	5.82858	3	3	6			1.26164	0.500597	-1.85853	-0.809389	-0.798729	-3.42562		-0.855005						2.73954	1.04128	-3.66338	-1.61976	-1.61139	-7.02102			2.73954	1.04128	-3.66338	-1.61976	-1.61139	-7.02102		0.939112		-3.45654	1.94914	0.25897
A0A0P0WGX7	11.5785	10.4981	11.6182	11.5308	11.3453	10.7735	3	3	6			2.3477	1.84674	2.42562	2.16295	2.15829	1.51927		2.07676						5.09783	3.84137	4.7812	4.32853	4.35421	3.11383			5.09783	3.84137	4.7812	4.32853	4.35421	3.11383		0.918863		-0.641275	1.67365	0.313459
A0A0P0X004	14.1492	7.76719	8.00388	7.94122	8.46748	9.69458	3	3	6			4.91838	-0.884116	-1.18869	-1.42662	-0.719522	0.440382		0.189968						10.6798	-1.83903	-2.34306	-2.85499	-1.45159	0.902589			10.6798	-1.83903	-2.34306	-2.85499	-1.45159	0.902589		0.124244		-3.30058	1.01529	0.494728
A0A0P0X0C0	8.27598	8.2114	6.64429	10.0164	9.33787	6.81378	3	3	6			-0.954828	-0.439905	-2.54829	0.648543	0.150862	-2.44042		-0.930673						-2.07332	-0.915037	-5.02298	1.29788	0.304355	-5.00179			-2.07332	-0.915037	-5.02298	1.29788	0.304355	-5.00179		0.56227		1.53726	0.884851	0.541544
A0A0P0X9Z7	9.87252	11.3885	12.4218	10.7711	10.2703	10.1804	3	3	6			0.641708	2.73719	3.22922	1.40323	1.08329	0.926204		1.67014						1.39341	5.69357	6.36519	2.80817	2.18547	1.89831			1.39341	5.69357	6.36519	2.80817	2.18547	1.89831		0.0577439		-2.18674	2.06691	0.23867
A0A0P0XBU0	8.85184	9.94601	10.3487	11.1246	10.1481	10.4744	3	3	6			-0.37897	1.29471	1.15615	1.75673	0.96109	1.22021		1.00165						-0.8229	2.69309	2.27891	3.51559	1.93894	2.5009			-0.8229	2.69309	2.27891	3.51559	1.93894	2.5009		0.294868		1.26878	1.51235	0.350541
A0A0P0XCU3	11.5129	10.8946	10.0034	11.0139	12.3283	10.1649	3	3	6			2.28213	2.24328	0.8108	1.64603	3.14128	0.910705		1.83904						4.95543	4.6662	1.59819	3.29407	6.33732	1.86654			4.95543	4.6662	1.59819	3.29407	6.33732	1.86654		0.797912		0.0927074	0.0601888	0.959139
A0A0P0XII1	9.29462	9.12874	9.00453	9.50928	9.50008	9.63365	3	3	6			0.0638082	0.477435	-0.188048	0.141432	0.31308	0.379447		0.197859						0.138554	0.993101	-0.370665	0.283037	0.631619	0.777699			0.138554	0.993101	-0.370665	0.283037	0.631619	0.777699		0.239447		0.310455	0.986515	0.504695
A0A0P0XM10	10.1028	10.0452	10.7432	9.1846	10.755	9.68928	3	3	6			0.871951	1.39391	1.55057	-0.183245	1.56797	0.435079		0.939372						1.89336	2.89943	3.05637	-0.366714	3.16327	0.891721			1.89336	2.89943	3.05637	-0.366714	3.16327	0.891721		0.221303		-1.38696	1.86708	0.274128
A0A0P0XXR9	8.54342	8.28753	9.45506	10.1433	7.40956	10.2791	3	3	6			-0.687394	-0.363779	0.262483	0.775408	-1.77744	1.02494		-0.127631						-1.49262	-0.756689	0.517385	1.55176	-3.58588	2.10068			-1.49262	-0.756689	0.517385	1.55176	-3.58588	2.10068		0.190223		0.599495	0.379729	0.768582
A0A178VEK7	11.0481	9.56487	9.24536	9.7862	11.5924	11.1202	3	3	6			1.81727	0.913566	0.0527853	0.418356	2.40536	1.86597		1.24555						3.94603	1.90029	0.104046	0.837223	4.85266	3.82442			3.94603	1.90029	0.104046	0.837223	4.85266	3.82442		0.918555		1.18798	0.976039	0.508374
A0A1P8B0B7	10.4575	11.0513	8.65625	8.47029	9.76583	11.9524	3	3	6			1.22667	2.39997	-0.536331	-0.897555	0.578828	2.69817		0.911626						2.66361	4.99212	-1.05717	-1.7962	1.16775	5.53007			2.66361	4.99212	-1.05717	-1.7962	1.16775	5.53007		0.813402		-0.565646	0.238291	0.847749
A0A1P8B590	8.35346	10.1043	10.8991	11.187	10.3526	12.0966	3	3	6			-0.877357	1.45303	1.70655	1.81913	1.16559	2.84241		1.35156						-1.9051	3.02241	3.36382	3.64048	2.3515	5.8257			-1.9051	3.02241	3.36382	3.64048	2.3515	5.8257		0.523784		2.44552	1.81267	0.284664
A0A1P8BH03	11.4465	10.1557	9.86109	11.2957	9.49973	10.6745	3	3	6			2.2157	1.5044	0.66851	1.92786	0.312721	1.42025		1.34157						4.8112	3.12926	1.31771	3.85808	0.630895	2.9109			4.8112	3.12926	1.31771	3.85808	0.630895	2.9109		0.948175		-0.619435	0.558265	0.679118
A1A696	10.2746	11.123	10.5351	9.59759	10.1241	12.2115	3	3	6			1.0438	2.47165	1.3425	0.229739	0.937116	2.95729		1.49702						2.26652	5.14122	2.64624	0.459758	1.89057	6.06114			2.26652	5.14122	2.64624	0.459758	1.89057	6.06114		0.447156		-0.5475	0.343223	0.788278
A1A697	11.5295	9.87029	11.6149	11.2456	11.3089	11.2302	3	3	6			2.29872	1.21898	2.42236	1.8777	2.1219	1.976		1.98594						4.99146	2.53557	4.77477	3.7577	4.2808	4.04993			4.99146	2.53557	4.77477	3.7577	4.2808	4.04993		0.0716818		-0.0711241	0.0994534	0.933387
A1A698	8.12872	10.2271	9.99915	9.37084	9.262	10.15	3	3	6			-1.1021	1.57583	0.806577	0.00299208	0.0749959	0.895799		0.375682						-2.39311	3.27784	1.58986	0.00598782	0.151299	1.83599			-2.39311	3.27784	1.58986	0.00598782	0.151299	1.83599		0.217523		-0.160439	0.100758	0.932543
A1A699	11.2833	9.69864	10.2079	9.67557	12.5757	8.92606	3	3	6			2.05251	1.04733	1.01529	0.307721	3.3887	-0.328144		1.24723						4.45684	2.17852	2.00126	0.615817	6.83648	-0.67255			4.45684	2.17852	2.00126	0.615817	6.83648	-0.67255		0.208382		-0.618957	0.298747	0.812958
A2CIR5	9.65619	8.41329	10.9126	11.9361	9.32249	9.66051	3	3	6			0.42538	-0.238018	1.72001	2.56824	0.135487	0.406311		0.836235						0.923675	-0.495095	3.39035	5.13961	0.273335	0.832758			0.923675	-0.495095	3.39035	5.13961	0.273335	0.832758		0.705668		0.808922	0.527304	0.69385
A2CIR7	9.91997	11.0251	6.45922	11.0258	9.33963	5.16896	3	3	6			0.689153	2.37383	-2.73336	1.65798	0.152622	-4.08524		-0.324168						1.49644	4.93775	-5.38778	3.31799	0.307906	-8.37294			1.49644	4.93775	-5.38778	3.31799	0.307906	-8.37294		0.857231		-1.93115	0.517843	0.698415
A2WJP3	2.56274	9.24693	8.78686	9.40167	10.6738	8.28425	3	3	6			-6.66807	0.595623	-0.40572	0.033821	1.48683	-0.969957		-0.987911						-14.4791	1.23894	-0.799722	0.0676832	2.99959	-1.98798			-14.4791	1.23894	-0.799722	0.0676832	2.99959	-1.98798		0.158381		5.03973	1.38618	0.382577
A2WLP4	9.68767	8.77099	9.21471	11.4555	10.219	9.35067	3	3	6			0.456861	0.119687	0.0221305	2.08763	1.03204	0.0964717		0.635804						0.992032	0.248958	0.0436218	4.17781	2.08208	0.197724			0.992032	0.248958	0.0436218	4.17781	2.08208	0.197724		0.118191		1.72433	2.18876	0.21934
A2WLR5	9.8636	9.09429	9.92202	10.8936	11.3647	10.1213	3	3	6			0.632785	0.442982	0.729442	1.52576	2.17773	0.867072		1.06263						1.37404	0.921436	1.43782	3.05337	4.39343	1.77712			1.37404	0.921436	1.43782	3.05337	4.39343	1.77712		0.0885166		1.83021	3.70047	0.0769214
A2WLS0	7.81711	9.44777	9.88243	7.50128	9.14977	9.12861	3	3	6			-1.4137	0.796458	0.689852	-1.86657	-0.0372325	-0.125589		-0.32613						-3.06973	1.65669	1.35978	-3.73541	-0.0751141	-0.257403			-3.06973	1.65669	1.35978	-3.73541	-0.0751141	-0.257403		0.755529		-1.33823	0.922046	0.52776
A2WNF5	10.1614	9.41378	11.0116	9.55294	9.71687	9.98897	3	3	6			0.930571	0.762469	1.81907	0.18509	0.529866	0.734766		0.826972						2.02065	1.58599	3.58561	0.370406	1.06897	1.50595			2.02065	1.58599	3.58561	0.370406	1.06897	1.50595		0.457508		-1.41564	3.18435	0.110005
A2WSZ6	11.1079	9.36711	8.60851	5.80046	7.53551	7.87406	3	3	6			1.87706	0.715802	-0.584064	-3.56739	-1.6515	-1.38014		-0.765038						4.07587	1.48892	-1.15126	-7.13913	-3.33179	-2.82869			4.07587	1.48892	-1.15126	-7.13913	-3.33179	-2.82869		0.896967		-5.90438	4.51095	0.04386
A2WW87	7.35782	9.42807	11.2898	6.78097	10.9314	7.97074	3	3	6			-1.873	0.77676	2.09727	-2.58688	1.7444	-1.28346		-0.187486						-4.06705	1.61572	4.13397	-5.17692	3.51921	-2.63054			-4.06705	1.61572	4.13397	-5.17692	3.51921	-2.63054		0.937853		-1.9903	0.726986	0.604165
A2WY46	9.80642	8.31936	9.89904	9.99915	9.8369	7.90479	3	3	6			0.575608	-0.331951	0.706462	0.631307	0.649897	-1.34942		0.146984						1.24988	-0.690484	1.39252	1.26338	1.31113	-2.76571			1.24988	-0.690484	1.39252	1.26338	1.31113	-2.76571		0.396492		-0.714375	0.598204	0.660576
A2WYG9	6.59615	8.02414	9.36076	7.97699	6.86034	8.2797	3	3	6			-2.63467	-0.627165	0.168182	-1.39085	-2.32666	-0.974499		-1.29761						-5.72095	-1.30455	0.331507	-2.7834	-4.69389	-1.99729			-5.72095	-1.30455	0.331507	-2.7834	-4.69389	-1.99729		0.328048		-0.926866	0.591605	0.663604
A2X208	10.4999	8.68552	9.29379	8.54678	7.29664	10.1496	3	3	6			1.26913	0.0342126	0.101216	-0.821069	-1.89036	0.895418		-0.0685756						2.75581	0.0711648	0.19951	-1.64314	-3.81369	1.83521			2.75581	0.0711648	0.19951	-1.64314	-3.81369	1.83521		0.440421		-2.21603	1.73677	0.300041
A2X345	10.4605	10.028	9.71428	10.9647	9.41094	9.42398	3	3	6			1.22964	1.37674	0.521703	1.59685	0.223934	0.169775		0.853108						2.67006	2.86372	1.02834	3.19565	0.451772	0.347964			2.67006	2.86372	1.02834	3.19565	0.451772	0.347964		0.561036		-0.855576	1.05935	0.479848
A2X5B4	7.51617	6.31852	10.629	10.4311	10.9231	7.47921	3	3	6			-1.71464	-2.33279	1.43642	1.06323	1.7361	-1.77499		-0.264445						-3.72319	-4.85238	2.83135	2.12776	3.50247	-3.63794			-3.72319	-4.85238	2.83135	2.12776	3.50247	-3.63794		0.909406		2.57884	1.08586	0.471112
A2X674	9.60181	9.17971	5.74249	8.90533	6.22865	10.0114	3	3	6			0.370995	0.528403	-3.45009	-0.462521	-2.95836	0.757165		-0.869067						0.805584	1.09912	-6.80054	-0.925606	-5.9683	1.55185			0.805584	1.09912	-6.80054	-0.925606	-5.9683	1.55185		0.845419		-0.148739	0.0480644	0.967233
A2X7U1	9.50847	9.20931	8.82703	10.6722	7.03342	10.5216	3	3	6			0.277656	0.558	-0.365552	1.30431	-2.15358	1.2674		0.148039						0.602905	1.16068	-0.720547	2.61021	-4.34471	2.59761			0.602905	1.16068	-0.720547	2.61021	-4.34471	2.59761		0.109655		-0.0599767	0.0274961	0.981122
A2XA73	7.51901	7.83434	8.20384	8.03122	6.6279	8.64659	3	3	6			-1.71181	-0.816962	-0.98874	-1.33663	-2.55911	-0.607608		-1.33681						-3.71703	-1.69934	-1.94893	-2.67489	-5.16283	-1.24533			-3.71703	-1.69934	-1.94893	-2.67489	-5.16283	-1.24533		0.470791		-0.572581	0.547141	0.684375
A2XAM1	8.88689	9.82182	8.80658	11.2001	9.47549	8.34434	3	3	6			-0.343927	1.17051	-0.385995	1.83225	0.288485	-0.909862		0.275245						-0.746808	2.43476	-0.760844	3.66674	0.582	-1.86482			-0.746808	2.43476	-0.760844	3.66674	0.582	-1.86482		0.612159		0.485606	0.298839	0.812906
A2XC52	9.74906	9.62158	9.86674	11.1577	11.0181	9.18542	3	3	6			0.518252	0.970269	0.674161	1.78981	1.83113	-0.0687818		0.952473						1.12534	2.01823	1.32885	3.58181	3.69418	-0.140972			1.12534	2.01823	1.32885	3.58181	3.69418	-0.140972		0.0879052		0.887531	0.91899	0.528879
A2XCA0	9.52097	8.62406	9.90638	9.26962	9.94588	9.27719	3	3	6			0.29016	-0.0272428	0.713802	-0.0982302	0.758878	0.022992		0.276726						0.630056	-0.056667	1.40699	-0.19658	1.53099	0.0471235			0.630056	-0.056667	1.40699	-0.19658	1.53099	0.0471235		0.760349		-0.199617	0.348436	0.785435
A2XD08	10.6997	6.98709	10.5602	11.8007	11.0224	6.63791	3	3	6			1.46885	-1.66421	1.36766	2.43289	1.83536	-2.61629		0.47071						3.18947	-3.46169	2.69582	4.86875	3.70273	-5.36224			3.18947	-3.46169	2.69582	4.86875	3.70273	-5.36224		0.608986		0.261877	0.0749237	0.949392
A2XD35	8.34399	8.51199	8.96304	8.4696	9.28228	10.5284	3	3	6			-0.886827	-0.139317	-0.229537	-0.898247	0.0952726	1.27415		-0.13075						-1.92567	-0.289791	-0.452445	-1.79759	0.192206	2.61145			-1.92567	-0.289791	-0.452445	-1.79759	0.192206	2.61145		0.285596		1.22466	1.23778	0.424024
A2XDG4	11.2498	8.7301	11.1959	10.8157	10.6375	9.81646	3	3	6			2.01895	0.0787894	2.00335	1.44786	1.45053	0.562253		1.26029						4.38398	0.163888	3.94884	2.89748	2.92634	1.15237			4.38398	0.163888	3.94884	2.89748	2.92634	1.15237		0.321578		-0.506839	0.421899	0.746441
A2XFI3	9.66986	7.2183	7.54836	10.125	9.22079	8.92175	3	3	6			0.439047	-1.43301	-1.64422	0.757178	0.0337844	-0.332451		-0.363278						0.953352	-2.98077	-3.24095	1.51528	0.0681579	-0.681378			0.953352	-2.98077	-3.24095	1.51528	0.0681579	-0.681378		0.368368		2.05681	2.04229	0.242779
A2XFW2	9.51983	10.4131	8.86895	10.3227	9.12208	10.9304	3	3	6			0.28902	1.76179	-0.323631	0.954869	-0.0649277	1.67617		0.715548						0.627582	3.66466	-0.637916	1.9109	-0.130987	3.4354			0.627582	3.66466	-0.637916	1.9109	-0.130987	3.4354		0.791453		0.52033	0.382283	0.767222
A2XK30	10.6502	9.91045	10.0147	9.04218	9.11442	10.4059	3	3	6			1.41934	1.25914	0.822141	-0.325669	-0.0725859	1.15168		0.709009						3.08198	2.61911	1.62054	-0.651734	-0.146437	2.36044			3.08198	2.61911	1.62054	-0.651734	-0.146437	2.36044		0.353075		-1.91978	2.89168	0.134747
A2XLM6	10.3315	8.61794	7.93593	11.2726	8.51771	9.80803	3	3	6			1.10066	-0.0333622	-1.25665	1.90472	-0.669296	0.553829		0.266652						2.39	-0.0693959	-2.477	3.81177	-1.35026	1.1351			2.39	-0.0693959	-2.477	3.81177	-1.35026	1.1351		0.941005		1.251	0.799955	0.574367
A2XQV4	6.58762	9.97613	5.47096	11.2782	8.08151	7.98704	3	3	6			-2.64319	1.32483	-3.72162	1.91037	-1.10549	-1.26717		-0.917046						-5.73946	2.75574	-7.33576	3.82307	-2.23026	-2.59713			-5.73946	2.75574	-7.33576	3.82307	-2.23026	-2.59713		0.612815		3.10505	1.13486	0.45538
A2XQX0	8.40943	8.20261	7.02226	7.07082	10.3015	8.70632	3	3	6			-0.821379	-0.448693	-2.17032	-2.29703	1.11449	-0.547879		-0.861802						-1.78355	-0.933317	-4.27796	-4.59686	2.24841	-1.12291			-1.78355	-0.933317	-4.27796	-4.59686	2.24841	-1.12291		0.410109		1.17449	0.679865	0.624223
A2XUN8	9.4335	9.4851	7.00236	8.24208	7.76075	8.10821	3	3	6			0.202689	0.833798	-2.19021	-1.12577	-1.42625	-1.14599		-0.808623						0.440122	1.73436	-4.31717	-2.25291	-2.87737	-2.34878			0.440122	1.73436	-4.31717	-2.25291	-2.87737	-2.34878		0.0220285		-1.77879	1.19807	0.435858
A2XVC2	9.5239	8.24165	12.3334	8.50815	8.08566	11.01	3	3	6			0.293083	-0.409658	3.14086	-0.859697	-1.10135	1.75577		0.469834						0.636403	-0.852119	6.19101	-1.72044	-2.2219	3.59855			0.636403	-0.852119	6.19101	-1.72044	-2.2219	3.59855		0.860407		-2.10636	1.00188	0.499349
A2XW69	11.2339	13.2511	13.319	13.7228	13.3267	13.0865	3	3	6			2.00311	4.59975	4.12639	4.35496	4.13971	3.83232		3.8427						4.34957	9.56782	8.13361	8.71523	8.35159	7.85456			4.34957	9.56782	8.13361	8.71523	8.35159	7.85456		0.0500836		0.956791	0.794277	0.576632
A2XX39	10.38	4.43736	5.7785	8.77663	8.30989	7.48285	3	3	6			1.14922	-4.21395	-3.41408	-0.591217	-0.877119	-1.77135		-1.61975						2.49542	-8.76533	-6.72956	-1.18316	-1.76953	-3.6305			2.49542	-8.76533	-6.72956	-1.18316	-1.76953	-3.6305		0.086754		2.13876	0.789495	0.578547
A2XYV5	7.04952	10.7055	4.32618	9.44843	10.5713	8.83048	3	3	6			-2.18129	2.05415	-4.8664	0.0805782	1.38427	-0.423719		-0.658734						-4.73648	4.27279	-9.59226	0.161255	2.79268	-0.868437			-4.73648	4.27279	-9.59226	0.161255	2.79268	-0.868437		0.134361		4.04715	1.35702	0.390387
A2Y040	11.4494	8.15142	10.2576	10.8012	9.38694	9.96392	3	3	6			2.21854	-0.499885	1.06505	1.43338	0.199935	0.70972		0.854456						4.81737	-1.0398	2.09934	2.8685	0.403356	1.45461			4.81737	-1.0398	2.09934	2.8685	0.403356	1.45461		0.302362		-0.38348	0.243277	0.844824
A2Y1D7	8.26903	8.3386	8.07548	7.77545	7.07296	7.25153	3	3	6			-0.961779	-0.312704	-1.1171	-1.5924	-2.11404	-2.00267		-1.35012						-2.08842	-0.650449	-2.20194	-3.18675	-4.26494	-4.1046			-2.08842	-0.650449	-2.20194	-3.18675	-4.26494	-4.1046		0.623056		-2.20516	5.53976	0.0214965
A2Y6Z7	11.3484	9.38832	8.27403	11.1689	11.1197	12.0315	3	3	6			2.11758	0.737012	-0.918549	1.80101	1.93271	2.77729		1.40784						4.59815	1.53304	-1.81057	3.60422	3.89913	5.69223			4.59815	1.53304	-1.81057	3.60422	3.89913	5.69223		0.221098		2.95832	2.27832	0.206138
A2Y8B9	11.2429	16.6254	8.0954	9.50657	9.68967	9.16556	3	3	6			2.01206	7.97412	-1.09718	0.138718	0.502661	-0.0886421		1.57362						4.36902	16.5868	-2.16267	0.277604	1.01409	-0.181677			4.36902	16.5868	-2.16267	0.277604	1.01409	-0.181677		0.00800202		-5.89437	1.33763	0.395671
A2Y8E0	9.41979	7.60199	9.54398	8.67334	7.40156	8.46033	3	3	6			0.188979	-1.04931	0.351402	-0.694503	-1.78544	-0.793869		-0.630458						0.410351	-2.18265	0.692656	-1.38985	-3.60202	-1.62708			0.410351	-2.18265	0.692656	-1.38985	-3.60202	-1.62708		0.739959		-1.84644	2.43846	0.18448
A2Y9C2	9.68285	9.12032	8.24883	10.9014	10.4698	11.4089	3	3	6			0.452042	0.469009	-0.943748	1.53355	1.28284	2.15471		0.824733						0.981568	0.975573	-1.86024	3.06896	2.58805	4.41621			0.981568	0.975573	-1.86024	3.06896	2.58805	4.41621		0.501111		3.32544	4.70592	0.0383157
A2YFR6	10.0105	9.78229	9.02414	9.79066	6.96347	11.3858	3	3	6			0.779716	1.13099	-0.168435	0.42281	-2.22353	2.13155		0.345516						1.69308	2.35254	-0.332005	0.846136	-4.48583	4.36874			1.69308	2.35254	-0.332005	0.846136	-4.48583	4.36874		0.179298		-0.994856	0.452115	0.730971
A2YMR0	9.91287	4.7165	11.6682	9.55566	8.67909	6.69919	3	3	6			0.682062	-3.93481	2.4756	0.187815	-0.507912	-2.55501		-0.60871						1.48104	-8.1847	4.8797	0.375859	-1.02468	-5.23665			1.48104	-8.1847	4.8797	0.375859	-1.02468	-5.23665		0.3133		-1.35384	0.383447	0.766604
A2YN56	13.3931	11.4389	12.0714	12.0009	12.1846	12.5398	3	3	6			4.16231	2.78759	2.87885	2.63307	2.99762	3.28563		3.12418						9.03809	5.7984	5.67456	5.26935	6.04751	6.73411			9.03809	5.7984	5.67456	5.26935	6.04751	6.73411		0.257317		-0.820029	0.929008	0.525219
A2YNY4	6.73105	8.54539	8.53216	10.1886	6.94579	9.49009	3	3	6			-2.49977	-0.105918	-0.660416	0.820741	-2.24121	0.235886		-0.74178						-5.42802	-0.220317	-1.30176	1.64248	-4.5215	0.483463			-5.42802	-0.220317	-1.30176	1.64248	-4.5215	0.483463		0.82615		1.51818	0.806317	0.57184
A2YQ56	11.0473	8.93755	10.8405	11.52	12.6236	12.1199	3	3	6			1.81652	0.286243	1.64796	2.15213	3.43658	2.86571		2.03419						3.9444	0.595408	3.24834	4.30689	6.93308	5.87345			3.9444	0.595408	3.24834	4.30689	6.93308	5.87345		0.717086		3.10842	3.81185	0.0712064
A2YQ93	8.4168	9.4719	8.86672	7.15381	6.97338	6.74685	3	3	6			-0.814015	0.820592	-0.325855	-2.21404	-2.21362	-2.50735		-1.20905						-1.76756	1.70689	-0.642299	-4.43078	-4.46584	-5.13897			-1.76756	1.70689	-0.642299	-4.43078	-4.46584	-5.13897		0.0964893		-4.44421	6.23182	0.0133056
A2YR02	11.1549	8.63898	11.1696	11.5031	9.81871	9.86515	3	3	6			1.92407	-0.0123282	1.97703	2.13523	0.631705	0.610943		1.21111						4.17795	-0.0256437	3.89697	4.27307	1.27442	1.25216			4.17795	-0.0256437	3.89697	4.27307	1.27442	1.25216		0.706994		-0.41654	0.291278	0.817178
A2YS71	9.32531	9.98584	7.50541	11.1216	11.187	8.93009	3	3	6			0.0944929	1.33453	-1.68716	1.75375	2.00004	-0.324116		0.52859						0.205183	2.77593	-3.3256	3.50964	4.03495	-0.664294			0.205183	2.77593	-3.3256	3.50964	4.03495	-0.664294		0.828033		2.40826	1.48964	0.356103
A2YV85	11.668	11.5219	10.2451	11.4157	11.8262	9.49675	3	3	6			2.43719	2.87059	1.0525	2.04789	2.63919	0.242552		1.88165						5.29213	5.97104	2.07461	4.09828	5.32439	0.497124			5.29213	5.97104	2.07461	4.09828	5.32439	0.497124		0.815296		-1.13933	0.791766	0.577637
A2YVG8	9.99873	10.0481	9.90308	10.3374	10.1675	11.8242	3	3	6			0.767919	1.39677	0.710506	0.969551	0.980539	2.57		1.23255						1.66747	2.90539	1.40049	1.94028	1.97817	5.26737			1.66747	2.90539	1.40049	1.94028	1.97817	5.26737		0.300366		1.07083	1.24707	0.421303
A2Z1W9	9.50779	4.46852	9.36486	9.96193	8.65069	11.0717	3	3	6			0.276982	-4.18279	0.17228	0.594079	-0.536312	1.81746		-0.309717						0.601442	-8.70052	0.339584	1.18888	-1.08198	3.725			0.601442	-8.70052	0.339584	1.18888	-1.08198	3.725		0.341805		3.8638	1.67099	0.314037
A2Z6C5	9.95156	9.25193	9.51895	8.54009	8.49506	8.52896	3	3	6			0.720749	0.600625	0.326371	-0.827759	-0.691949	-0.72524		-0.0995339						1.56504	1.24935	0.643317	-1.65653	-1.39596	-1.48642			1.56504	1.24935	0.643317	-1.65653	-1.39596	-1.48642		0.147744		-2.66554	10.5024	0.000689382
A2Z6Z0	8.14124	7.25955	11.3424	11.0502	8.73278	11.5843	3	3	6			-1.08957	-1.39175	2.14983	1.68234	-0.454227	2.33006		0.537779						-2.36591	-2.89495	4.23758	3.36673	-0.916374	4.77559			-2.36591	-2.89495	4.23758	3.36673	-0.916374	4.77559		0.715022		2.74974	1.35423	0.391143
A2Z7C4	7.04078	6.56882	9.01483	6.14979	6.40572	6.95826	3	3	6			-2.19003	-2.08248	-0.177748	-3.21806	-2.78128	-2.29594		-2.12426						-4.75546	-4.33173	-0.350362	-6.44004	-5.61106	-4.70567			-4.75546	-4.33173	-0.350362	-6.44004	-5.61106	-4.70567		0.22603		-2.43974	2.49949	0.176839
A2Z928	13.4656	10.3559	13.1256	13.6366	11.6063	13.491	3	3	6			4.23475	1.70459	3.93301	4.26878	2.41926	4.23677		3.4662						9.19539	3.54569	7.75245	8.54276	4.8807	8.68352			9.19539	3.54569	7.75245	8.54276	4.8807	8.68352		0.700889		0.537819	0.302679	0.810746
A2Z9W7	9.00534	12.166	12.0557	15.6016	8.52407	11.9847	3	3	6			-0.225469	3.51473	2.86308	6.23375	-0.662933	2.73054		2.40895						-0.489585	7.31091	5.64347	12.4751	-1.33743	5.5964			-0.489585	7.31091	5.64347	12.4751	-1.33743	5.5964		0.522646		1.42309	0.368956	0.774343
A2ZAI7	7.53908	7.06867	11.3314	8.72687	10.504	9.88844	3	3	6			-1.69173	-1.58264	2.13884	-0.640983	1.31702	0.634236		0.0291249						-3.67345	-3.292	4.21592	-1.28275	2.657	1.29991			-3.67345	-3.292	4.21592	-1.28275	2.657	1.29991		0.336626		1.8079	0.847152	0.555881
A2ZC67	9.01542	8.58492	10.8038	5.14339	9.24864	9.42013	3	3	6			-0.215398	-0.0663822	1.61123	-4.22445	0.0616342	0.165926		-0.444574						-0.467717	-0.13808	3.17593	-8.45406	0.124343	0.340076			-0.467717	-0.13808	3.17593	-8.45406	0.124343	0.340076		0.277946		-3.51993	1.63274	0.322475
A2ZIW7	8.15446	9.68277	9.73503	11.6051	9.7305	9.31195	3	3	6			-1.07635	1.03146	0.542454	2.23726	0.543499	0.0577502		0.556013						-2.3372	2.14551	1.06924	4.47725	1.09647	0.118363			-2.3372	2.14551	1.06924	4.47725	1.09647	0.118363		0.977108		1.60484	1.17311	0.443465
A2ZJC9	9.76719	7.18468	7.52223	8.75919	9.24015	7.424	3	3	6			0.536379	-1.46663	-1.67035	-0.608659	0.0531423	-1.8302		-0.831053						1.1647	-3.0507	-3.29246	-1.21806	0.107211	-3.75111			1.1647	-3.0507	-3.29246	-1.21806	0.107211	-3.75111		0.75911		0.1055	0.0634687	0.95696
A2ZMH2	10.0599	10.003	10.3835	10.978	9.84354	8.46234	3	3	6			0.829073	1.35165	1.19091	1.61015	0.656539	-0.791864		0.807743						1.80026	2.81153	2.34743	3.22226	1.32453	-1.62297			1.80026	2.81153	2.34743	3.22226	1.32453	-1.62297		0.0824313		-1.34514	1.31116	0.402997
A2ZNT5	8.81224	9.16536	7.08247	8.79568	7.54597	8.12712	3	3	6			-0.418571	0.514052	-2.11011	-0.572165	-1.64104	-1.12709		-0.892486						-0.90889	1.06927	-4.15928	-1.14503	-3.31069	-2.31003			-0.90889	1.06927	-4.15928	-1.14503	-3.31069	-2.31003		0.288497		-0.92228	0.72379	0.605505
A2ZP58	9.72799	10.7282	11.5986	10.1728	10.2176	11.097	3	3	6			0.497176	2.07687	2.40603	0.804955	1.03059	1.84278		1.44307						1.07957	4.32004	4.74258	1.61089	2.07915	3.77688			1.07957	4.32004	4.74258	1.61089	2.07915	3.77688		0.488749		-0.891761	0.890129	0.539566
A2ZVG7	11.6725	10.6881	9.43321	10.1754	12.086	11.0095	3	3	6			2.4417	2.03677	0.240633	0.807577	2.89903	1.75535		1.69684						5.30194	4.23663	0.474316	1.61614	5.84861	3.59769			5.30194	4.23663	0.474316	1.61614	5.84861	3.59769		0.821552		0.349849	0.211884	0.863409
A2ZVI7	8.04029	9.70027	10.7786	9.2148	11.4001	9.29664	3	3	6			-1.19052	1.04896	1.58599	-0.153043	2.21313	0.0424386		0.591159						-2.58512	2.18191	3.12618	-0.306273	4.46484	0.0869804			-2.58512	2.18191	3.12618	-0.306273	4.46484	0.0869804		0.856067		0.507522	0.25375	0.838713
A2ZX97	8.76344	8.39154	7.14731	9.37689	7.57342	8.58391	3	3	6			-0.467368	-0.259763	-2.04527	0.00903721	-1.61359	-0.670292		-0.841207						-1.01485	-0.540326	-4.03148	0.0180854	-3.2553	-1.3738			-1.01485	-0.540326	-4.03148	0.0180854	-3.2553	-1.3738		0.858885		0.325209	0.263217	0.833228
A3A2Z8	5.18654	8.35324	5.16748	6.4116	12.4022	3.83875	3	3	6			-4.04427	-0.298072	-4.0251	-2.95625	3.21523	-5.41545		-2.25399						-8.78178	-0.620012	-7.93396	-5.91611	6.48653	-11.0993			-8.78178	-0.620012	-7.93396	-5.91611	6.48653	-11.0993		0.395649		2.26896	0.480465	0.716746
A3A871	9.77256	8.27636	9.34478	6.29249	5.52623	8.75332	3	3	6			0.541749	-0.37495	0.152207	-3.07536	-3.66078	-0.500885		-1.153						1.17636	-0.779925	0.300018	-6.15447	-7.38539	-1.02659			1.17636	-0.779925	0.300018	-6.15447	-7.38539	-1.02659		0.155699		-5.08764	3.91876	0.0661203
A3A8Q4	7.21111	9.20675	9.84067	9.77042	10.4597	6.18731	3	3	6			-2.0197	0.555439	0.648091	0.402568	1.27273	-3.06689		-0.36796						-4.38561	1.15535	1.27746	0.805627	2.56766	-6.28577			-4.38561	1.15535	1.27746	0.805627	2.56766	-6.28577		0.645419		-0.3199	0.109098	0.927167
A3A8W6	7.69195	4.44626	10.0146	10.0807	10.2291	9.97097	3	3	6			-1.53886	-4.20505	0.822001	0.712836	1.04205	0.716766		-0.408375						-3.3415	-8.74683	1.62026	1.42654	2.10228	1.46906			-3.3415	-8.74683	1.62026	1.42654	2.10228	1.46906		0.0105985		5.15531	2.14111	0.226705
A3AB67	9.52714	11.4694	9.68454	10.303	10.5162	10.6978	3	3	6			0.296332	2.81813	0.491961	0.935134	1.32919	1.44363		1.21906						0.643459	5.86193	0.969715	1.87141	2.68155	2.95881			0.643459	5.86193	0.969715	1.87141	2.68155	2.95881		0.0720332		0.0122237	0.0077148	0.994667
A3ABE1	10.7565	8.61449	9.64315	9.98014	10.5707	9.19094	3	3	6			1.52566	-0.0368181	0.450575	0.612292	1.3837	-0.0632666		0.645358						3.31284	-0.0765844	0.888139	1.22533	2.79153	-0.129669			3.31284	-0.0765844	0.888139	1.22533	2.79153	-0.129669		0.824052		-0.079065	0.0665244	0.954936
A3AHG5	10.6847	10.8256	10.7101	9.35143	8.69446	8.75852	3	3	6			1.45394	2.17429	1.51754	-0.0164227	-0.492543	-0.495679		0.690187						3.15709	4.52268	2.99126	-0.0328654	-0.993673	-1.01592			3.15709	4.52268	2.99126	-0.0328654	-0.993673	-1.01592		0.616892		-4.23783	9.03352	0.00190827
A3AJ77	8.71994	11.278	11.0006	10.702	8.90884	8.11489	3	3	6			-0.510876	2.62668	1.80799	1.33415	-0.278162	-1.13931		0.640077						-1.10932	5.46369	3.56376	2.66993	-0.561174	-2.33509			-1.10932	5.46369	3.56376	2.66993	-0.561174	-2.33509		0.720243		-2.71482	1.60617	0.328469
A3AVH5	10.2452	8.24093	8.6157	11.9496	9.64544	11.3911	3	3	6			1.01438	-0.410373	-0.576874	2.5818	0.458437	2.13693		0.867384						2.20264	-0.853606	-1.13709	5.16674	0.924868	4.37977			2.20264	-0.853606	-1.13709	5.16674	0.924868	4.37977		0.804899		3.41981	3.15439	0.112314
A3AWA4	10.5788	9.7797	10.2102	10.9366	12.3507	12.6591	3	3	6			1.34794	1.1284	1.01761	1.56879	3.16371	3.40488		1.93855						2.92693	2.34715	2.00583	3.13949	6.38259	6.9785			2.92693	2.34715	2.00583	3.13949	6.38259	6.9785		0.0966912		3.07356	3.92577	0.0658001
A3AWH5	10.7933	5.55465	10.9781	8.1918	8.60988	9.63891	3	3	6			1.56247	-3.09666	1.78549	-1.17605	-0.577124	0.384704		-0.186195						3.39276	-6.44128	3.51942	-2.35353	-1.16431	0.788474			3.39276	-6.44128	3.51942	-2.35353	-1.16431	0.788474		0.143099		-1.06675	0.375291	0.77095
A3AZ88	8.08082	6.79325	6.89966	6.03653	9.49097	7.61765	3	3	6			-1.15	-1.85806	-2.29292	-3.33132	0.303966	-1.63655		-1.66081						-2.49711	-3.86491	-4.51962	-6.66671	0.613232	-3.35421			-2.49711	-3.86491	-4.51962	-6.66671	0.613232	-3.35421		0.148432		0.491319	0.263153	0.833265
A3AZ89	9.06923	9.00683	7.9655	8.69269	7.10978	7.56247	3	3	6			-0.161578	0.355524	-1.22708	-0.675163	-2.07723	-1.69173		-0.912876						-0.350852	0.739517	-2.41873	-1.35115	-4.19067	-3.4673			-0.350852	0.739517	-2.41873	-1.35115	-4.19067	-3.4673		0.916669		-2.32635	2.85516	0.138201
A3B0Y1	10.4007	9.37916	10.2886	10.6157	10.7365	9.35804	3	3	6			1.16985	0.727855	1.09606	1.24787	1.54948	0.103833		0.982492						2.54023	1.51399	2.16046	2.49727	3.12598	0.212813			2.54023	1.51399	2.16046	2.49727	3.12598	0.212813		0.205565		-0.12621	0.153478	0.899081
A3B529	11.0755	8.19284	11.8357	10.0608	10.3306	10.1066	3	3	6			1.84473	-0.458472	2.64316	0.692983	1.14358	0.852361		1.11972						4.00568	-0.953656	5.20998	1.38681	2.30709	1.74696			4.00568	-0.953656	5.20998	1.38681	2.30709	1.74696		0.0395053		-0.940379	0.5804	0.668778
A3B9A0	8.79734	7.20506	11.2432	8.15274	5.98007	10.6869	3	3	6			-0.433475	-1.44625	2.0506	-1.21511	-3.20693	1.43265		-0.469753						-0.941253	-3.0083	4.04197	-2.43169	-6.46978	2.9363			-0.941253	-3.0083	4.04197	-2.43169	-6.46978	2.9363		0.74208		-2.0192	0.765504	0.588248
A3BDI8	8.69366	8.93752	8.00658	5.80534	8.01881	8.42194	3	3	6			-0.537151	0.286214	-1.186	-3.5625	-1.16819	-0.832264		-1.16665						-1.16638	0.595347	-2.33775	-7.12935	-2.35675	-1.70577			-1.16638	0.595347	-2.33775	-7.12935	-2.35675	-1.70577		0.398165		-2.76103	2.17197	0.221908
A3BF39	13.7708	13.0479	13.0841	12.965	12.926	12.8786	3	3	6			4.53995	4.39663	3.89155	3.5972	3.73899	3.6244		3.96479						9.85811	9.14533	7.67072	7.19878	7.54318	7.42843			9.85811	9.14533	7.67072	7.19878	7.54318	7.42843		0.0482295		-1.50126	2.81681	0.141924
A3BFT0	10.8387	10.7198	10.8979	9.27051	9.61939	9.90272	3	3	6			1.60792	2.06851	1.70534	-0.0973423	0.43239	0.648519		1.06089						3.49145	4.30266	3.36144	-0.194803	0.872318	1.32918			3.49145	4.30266	3.36144	-0.194803	0.872318	1.32918		0.596786		-3.04962	7.6992	0.00481183
A3BH85	10.7234	9.51694	11.1657	11.8003	11.0197	8.80284	3	3	6			1.49259	0.865634	1.97315	2.4324	1.83272	-0.451363		1.35752						3.24103	1.80058	3.88931	4.86778	3.6974	-0.925095			3.24103	1.80058	3.88931	4.86778	3.6974	-0.925095		0.217186		-0.430281	0.269546	0.829581
A3BH91	7.24213	4.92339	9.06024	7.20281	8.45931	10.2135	3	3	6			-1.98869	-3.72792	-0.132341	-2.16504	-0.727696	0.959266		-1.29707						-4.31826	-7.75436	-0.260859	-4.33272	-1.46808	1.96607			-4.31826	-7.75436	-0.260859	-4.33272	-1.46808	1.96607		0.828257		2.83292	1.42135	0.373363
A3BLC3	9.0242	8.53846	13.2475	10.6953	10.013	11.9476	3	3	6			-0.206615	-0.112847	4.05492	1.32747	0.826038	2.69343		1.4304						-0.448646	-0.234729	7.99274	2.65655	1.66648	5.52036			-0.448646	-0.234729	7.99274	2.65655	1.66648	5.52036		0.294845		0.844675	0.334821	0.792883
A3BMN9	8.23898	7.06609	9.50809	9.039	9.78057	8.31329	3	3	6			-0.991835	-1.58522	0.315515	-0.328847	0.593568	-0.940911		-0.489621						-2.15368	-3.29737	0.621918	-0.658094	1.19748	-1.92845			-2.15368	-3.29737	0.621918	-0.658094	1.19748	-1.92845		0.75653		1.14669	1.05728	0.480537
A3BMZ5	11.7186	8.07044	11.3213	11.3657	8.11265	12.288	3	3	6			2.48781	-0.580864	2.12873	1.99787	-1.07436	3.03383		1.33217						5.40205	-1.20824	4.19599	3.99818	-2.16745	6.21801			5.40205	-1.20824	4.19599	3.99818	-2.16745	6.21801		0.792648		-0.113683	0.0386029	0.973597
A3BN26	8.52533	10.1964	8.879	9.49271	9.85467	9.14116	3	3	6			-0.705488	1.54505	-0.313576	0.124867	0.667661	-0.11304		0.200912						-1.5319	3.21382	-0.618096	0.249885	1.34696	-0.231683			-1.5319	3.21382	-0.618096	0.249885	1.34696	-0.231683		0.187171		0.100449	0.0729282	0.950706
A3BNA1	3.70343	9.57357	8.81099	10.2476	8.79409	8.50355	3	3	6			-5.52738	0.922264	-0.381588	0.879724	-0.392914	-0.750655		-0.875091						-12.0022	1.91838	-0.752156	1.76052	-0.792679	-1.53851			-12.0022	1.91838	-0.752156	1.76052	-0.792679	-1.53851		0.103977		3.42177	1.06374	0.478391
A3BUD2	9.7448	10.5736	9.80893	11.7538	7.60073	8.79555	3	3	6			0.513988	1.92225	0.616355	2.38591	-1.58627	-0.45865		0.565596						1.11608	3.99842	1.21491	4.77473	-3.20021	-0.94003			1.11608	3.99842	1.21491	4.77473	-3.20021	-0.94003		0.273614		-1.8983	1.00394	0.498638
A3BXL8	10.7429	9.16222	11.6323	9.98342	12.0661	7.54249	3	3	6			1.51209	0.510908	2.43969	0.615573	2.87905	-1.71171		1.04093						3.28336	1.06273	4.80893	1.2319	5.8083	-3.50826			3.28336	1.06273	4.80893	1.2319	5.8083	-3.50826		0.281084		-1.87436	0.85352	0.553433
A3C039	6.80826	6.23128	8.25427	7.93876	7.67666	8.49382	3	3	6			-2.42256	-2.42003	-0.938304	-1.42909	-1.51034	-0.760387		-1.58012						-5.26037	-5.03384	-1.84951	-2.85993	-3.04702	-1.55846			-5.26037	-5.03384	-1.84951	-2.85993	-3.04702	-1.55846		0.306143		1.55944	1.93003	0.262424
A3C057	10.3339	9.44226	9.42221	8.73873	10.2551	9.38899	3	3	6			1.10313	0.790952	0.229635	-0.629114	1.06814	0.134784		0.449587						2.39534	1.64524	0.452638	-1.25899	2.15491	0.276247			2.39534	1.64524	0.452638	-1.25899	2.15491	0.276247		0.494336		-1.10702	1.37464	0.38565
A3C4S4	9.47484	7.40803	8.55612	8.41325	7.80748	8.48228	3	3	6			0.244029	-1.24327	-0.636454	-0.954601	-1.37952	-0.771919		-0.79029						0.529888	-2.58611	-1.25453	-1.91037	-2.7831	-1.58209			0.529888	-2.58611	-1.25453	-1.91037	-2.7831	-1.58209		0.272324		-0.988269	1.44841	0.366426
A3CCP9	9.61714	7.02813	10.0788	10.3712	12.6224	6.95513	3	3	6			0.386324	-1.62318	0.886241	1.00338	3.43537	-2.29908		0.298177						0.838869	-3.37634	1.74689	2.00799	6.93063	-4.71209			0.838869	-3.37634	1.74689	2.00799	6.93063	-4.71209		0.359028		1.67237	0.563358	0.676725
A3CEM4	8.32881	8.3878	6.00491	10.4989	10.8982	6.61023	3	3	6			-0.902003	-0.263505	-3.18767	1.1311	1.71122	-2.64397		-0.692472						-1.95862	-0.548111	-6.28329	2.26358	3.45227	-5.41898			-1.95862	-0.548111	-6.28329	2.26358	3.45227	-5.41898		0.556091		3.02896	1.29691	0.406998
A4FVP6	9.31213	6.53049	7.6642	8.09006	9.07353	3.76702	3	3	6			0.0813216	-2.12081	-1.52838	-1.27779	-0.113479	-5.48718		-1.74105						0.176583	-4.41146	-3.01262	-2.55713	-0.228937	-11.2463			0.176583	-4.41146	-3.01262	-2.55713	-0.228937	-11.2463		0.281786		-2.26163	0.821926	0.565686
A4KAG7	11.8762	11.93	14.0231	9.68596	12.1168	7.76971	3	3	6			2.64536	3.27869	4.83048	0.31811	2.92979	-1.4845		2.08632						5.74416	6.81993	9.52147	0.636607	5.91067	-3.04256			5.74416	6.81993	9.52147	0.636607	5.91067	-3.04256		0.315089		-6.19362	3.41268	0.0939035
A4KAG8	10.3236	10.6018	11.693	11.7547	8.57935	9.09703	3	3	6			1.09281	1.95046	2.50043	2.38683	-0.607651	-0.157171		1.19428						2.37293	4.05711	4.92865	4.77657	-1.2259	-0.322131			2.37293	4.05711	4.92865	4.77657	-1.2259	-0.322131		0.277583		-2.71005	2.0027	0.249533
A4LBC0	9.86374	9.05669	8.99893	6.71493	8.67944	8.67811	3	3	6			0.632925	0.405385	-0.193648	-2.65292	-0.50756	-0.576095		-0.481985						1.37434	0.843231	-0.381704	-5.30907	-1.02397	-1.18074			1.37434	0.843231	-0.381704	-5.30907	-1.02397	-1.18074		0.241525		-3.11655	3.24237	0.105669
A4PBL4	10.7533	12.5663	12.4202	12.5171	11.2167	10.6181	3	3	6			1.52249	3.91496	3.22759	3.14923	2.02974	1.36391		2.53465						3.30595	8.14342	6.36198	6.3023	4.09487	2.79541			3.30595	8.14342	6.36198	6.3023	4.09487	2.79541		0.68864		-1.53959	1.22664	0.427312
A4PBP6	11.7052	11.972	10.6768	11.2062	12.0708	11.5177	3	3	6			2.47434	3.32074	1.48417	1.83831	2.88375	2.26347		2.37746						5.37282	6.90739	2.92549	3.67886	5.81779	4.63911			5.37282	6.90739	2.92549	3.67886	5.81779	4.63911		0.443047		-0.356645	0.322786	0.799524
A4PBP7	10.0437	6.44781	10.0486	8.44286	9.13735	10.7942	3	3	6			0.812898	-2.2035	0.856046	-0.924987	-0.0496552	1.53997		0.00512916						1.76514	-4.58344	1.68737	-1.8511	-0.100176	3.15626			1.76514	-4.58344	1.68737	-1.8511	-0.100176	3.15626		0.654581		0.778638	0.364847	0.776551
A4PBP8	10.0572	9.87007	11.9716	12.3751	9.11369	10.0448	3	3	6			0.826367	1.21876	2.779	3.0073	-0.0733149	0.790602		1.42479						1.79438	2.53512	5.47775	6.01827	-0.147908	1.62039			1.79438	2.53512	5.47775	6.01827	-0.147908	1.62039		0.547048		-0.772171	0.438837	0.737729
A4PBP9	9.05948	9.57143	12.0778	10.8144	9.44702	11.0131	3	3	6			-0.171333	0.920123	2.88517	1.44657	0.260016	1.75891		1.18324						-0.372034	1.91393	5.68703	2.89491	0.524566	3.60499			-0.372034	1.91393	5.68703	2.89491	0.524566	3.60499		0.434954		-0.0681486	0.0373956	0.974412
A4PBQ0	9.52783	9.15881	9.77258	6.9991	7.20926	9.06188	3	3	6			0.297016	0.507505	0.580001	-2.36875	-1.97775	-0.192318		-0.525715						0.644945	1.05565	1.14325	-4.74039	-3.98998	-0.394168			0.644945	1.05565	1.14325	-4.74039	-3.98998	-0.394168		0.0258884		-3.98946	3.39572	0.0950136
A6BLW4	8.37086	8.00394	6.02505	8.19061	7.69481	6.83681	3	3	6			-0.859951	-0.647368	-3.16753	-1.17723	-1.49219	-2.41739		-1.62694						-1.86731	-1.34657	-6.24358	-2.3559	-3.01041	-4.95459			-1.86731	-1.34657	-6.24358	-2.3559	-3.01041	-4.95459		0.403254		-0.287815	0.19018	0.876496
A7LFZ6	11.1109	10.9221	9.75282	12.7928	10.8685	7.95257	3	3	6			1.88013	2.27076	0.560238	3.42494	1.68151	-1.30164		1.41932						4.08253	4.72335	1.1043	6.85406	3.39234	-2.66778			4.08253	4.72335	1.1043	6.85406	3.39234	-2.66778		0.276696		-0.777186	0.307162	0.80823
A8MQY1	8.33047	6.19824	10.4966	9.44762	8.84668	8.73203	3	3	6			-0.900344	-2.45307	1.30398	0.0797727	-0.340324	-0.522171		-0.472026						-1.95502	-5.10257	2.5703	0.159643	-0.686581	-1.07022			-1.95502	-5.10257	2.5703	0.159643	-0.686581	-1.07022		0.0518548		0.963377	0.532458	0.691376
A9XMT5	9.48991	8.54817	5.66004	9.13996	9.58075	6.9222	3	3	6			0.259096	-0.10314	-3.53254	-0.227887	0.393743	-2.332		-0.923789						0.562603	-0.21454	-6.96306	-0.456052	0.794352	-4.77958			0.562603	-0.21454	-6.96306	-0.456052	0.794352	-4.77958		0.666097		0.724571	0.292278	0.816611
B1Q3J6	9.18083	9.48981	10.9609	11.4298	9.9017	11.4058	3	3	6			-0.0499834	0.838501	1.76837	2.06192	0.714692	2.15163		1.24752						-0.108535	1.74415	3.48566	4.12636	1.44184	4.4099			-0.108535	1.74415	3.48566	4.12636	1.44184	4.4099		0.90735		1.61894	1.67542	0.313076
B2ZX90	11.5825	9.33016	10.6803	11.0854	10.5683	11.2885	3	3	6			2.35171	0.678848	1.48769	1.71756	1.38133	2.03426		1.60857						5.10652	1.41206	2.93243	3.43721	2.78675	4.16934			5.10652	1.41206	2.93243	3.43721	2.78675	4.16934		0.243711		0.314097	0.326889	0.797254
B4XT64	9.75027	7.69759	8.96751	8.15578	5.19196	7.72744	3	3	6			0.519459	-0.953714	-0.225063	-1.21207	-3.99505	-1.52676		-1.2322						1.12796	-1.9838	-0.443626	-2.42561	-8.05975	-3.12918			1.12796	-1.9838	-0.443626	-2.42561	-8.05975	-3.12918		0.40873		-4.10503	3.21442	0.107737
B5BT18	12.2031	12.9711	13.7612	12.3485	14.044	13.9516	3	3	6			2.97226	4.31982	4.56866	2.98063	4.85696	4.69736		4.06595						6.454	8.98556	9.00539	5.9649	9.79861	9.62751			6.454	8.98556	9.00539	5.9649	9.79861	9.62751		0.62926		0.315356	0.243306	0.844807
B5X570	10.0803	10.5372	10.5294	10.4343	9.15079	9.6384	3	3	6			0.849472	1.88591	1.33685	1.06647	-0.0362169	0.384197		0.914447						1.84455	3.92284	2.6351	2.13424	-0.0730652	0.787435			1.84455	3.92284	2.6351	2.13424	-0.0730652	0.787435		0.941264		-1.8513	3.26528	0.104005
B6DMK2	10.1189	10.9165	11.1051	11.7885	12.5956	10.5806	3	3	6			0.888128	2.26517	1.91255	2.42067	3.4086	1.32643		2.03692						1.92849	4.71172	3.76986	4.84428	6.87664	2.7186			1.92849	4.71172	3.76986	4.84428	6.87664	2.7186		0.633477		1.34315	1.29557	0.407376
B6RGY0	9.39868	6.28122	7.81442	8.39815	8.59518	8.40186	3	3	6			0.167867	-2.37009	-1.37815	-0.969703	-0.591822	-0.852342		-0.999041						0.364508	-4.92997	-2.71651	-1.94059	-1.19396	-1.74693			0.364508	-4.92997	-2.71651	-1.94059	-1.19396	-1.74693		0.0415804		0.800165	0.609275	0.655526
B6SFA4	11.3842	9.15651	10.8305	11.2005	9.63987	9.97484	3	3	6			2.15343	0.505206	1.63794	1.83268	0.45286	0.720642		1.21713						4.67599	1.05087	3.22857	3.6676	0.913616	1.477			4.67599	1.05087	3.22857	3.6676	0.913616	1.477		0.777281		-0.965737	0.962518	0.513161
B6UV92	9.58385	10.3107	9.78124	10.0775	10.5069	11.9053	3	3	6			0.353041	1.65942	0.588668	0.709635	1.3199	2.65111		1.21363						0.766598	3.45172	1.16034	1.42014	2.66281	5.43361			0.766598	3.45172	1.16034	1.42014	2.66281	5.43361		0.66493		1.3793	1.33675	0.395912
B7E321	10.39	3.54547	9.43808	8.48458	9.13976	8.10575	3	3	6			1.15914	-5.10583	0.245508	-0.883267	-0.047249	-1.14845		-0.963358						2.51697	-10.6205	0.483925	-1.76761	-0.0953219	-2.35382			2.51697	-10.6205	0.483925	-1.76761	-0.0953219	-2.35382		0.0534649		1.13429	0.326282	0.797589
B7EA73	9.59869	9.46923	11.7429	11.8779	10.2883	11.5826	3	3	6			0.367873	0.817928	2.55036	2.51001	1.10128	2.32836		1.61264						0.798803	1.70135	5.02708	5.02308	2.22177	4.77212			0.798803	1.70135	5.02708	5.02308	2.22177	4.77212		0.652719		1.49658	1.34564	0.393481
B7ECS8	8.66288	5.463	9.43146	7.5183	8.21815	9.66619	3	3	6			-0.567931	-3.18831	0.238879	-1.84955	-0.968854	0.411986		-0.987296						-1.23321	-6.63192	0.470859	-3.70135	-1.9546	0.84439			-1.23321	-6.63192	0.470859	-3.70135	-1.9546	0.84439		0.55326		0.860903	0.415897	0.749554
B7EIH2	8.19205	6.80967	10.2154	9.45177	9.55336	9.59309	3	3	6			-1.03877	-1.84164	1.02283	0.0839196	0.366356	0.33889		-0.178067						-2.25559	-3.83074	2.01613	0.167942	0.739099	0.694575			-2.25559	-3.83074	2.01613	0.167942	0.739099	0.694575		0.0218135		1.89061	1.3502	0.392237
B7EJ91	10.4337	10.2248	10.26	9.73792	11.4569	12.1562	3	3	6			1.20288	1.57354	1.0674	0.370075	2.26986	2.90204		1.5643						2.61194	3.27308	2.10398	0.740602	4.5793	5.9479			2.61194	3.27308	2.10398	0.740602	4.5793	5.9479		0.0900671		1.09294	0.913697	0.530823
B7F7B9	8.0359	10.4993	8.87952	12.2122	9.50345	10.4569	3	3	6			-1.19491	1.84804	-0.313055	2.84434	0.316443	1.20267		0.783921						-2.59465	3.84406	-0.61707	5.69216	0.638404	2.46493			-2.59465	3.84406	-0.61707	5.69216	0.638404	2.46493		0.751552		2.72105	1.63474	0.322027
B7F7K7	8.88996	6.79831	9.4559	4.64593	5.29116	9.55758	3	3	6			-0.340852	-1.853	0.263325	-4.72192	-3.89584	0.303376		-1.70748						-0.740131	-3.85438	0.519046	-9.44959	-7.85961	0.621788			-0.740131	-3.85438	0.519046	-9.44959	-7.85961	0.621788		0.294814		-4.20398	1.82542	0.282158
B7F8N7	9.74099	11.1387	8.76281	4.58634	9.06969	11.6109	3	3	6			0.510182	2.48741	-0.429763	-4.7815	-0.117314	2.35673		0.00429082						1.10782	5.17401	-0.847116	-9.56884	-0.236673	4.83026			1.10782	5.17401	-0.847116	-9.56884	-0.236673	4.83026		0.30055		-3.46999	1.02802	0.490381
B7F8P5	6.64947	3.07068	10.9773	8.64151	9.28538	10.7702	3	3	6			-2.58134	-5.58063	1.7847	-0.726338	0.0983741	1.51597		-0.914877						-5.60515	-11.6081	3.51787	-1.45356	0.198463	3.10706			-5.60515	-11.6081	3.51787	-1.45356	0.198463	3.10706		0.168338		5.18246	1.63284	0.322452
B7F9I5	7.29673	8.06167	9.1108	6.95641	8.52313	8.489	3	3	6			-1.93408	-0.589639	-0.0817807	-2.41144	-0.663874	-0.765197		-1.07434						-4.19968	-1.22649	-0.1612	-4.82583	-1.33932	-1.56832			-4.19968	-1.22649	-0.1612	-4.82583	-1.33932	-1.56832		0.929443		-0.715363	0.541069	0.687261
B8A7Z5	3.93329	6.96798	9.06838	10.0839	6.81352	8.56049	3	3	6			-5.29752	-1.68333	-0.124202	0.71603	-2.37348	-0.693717		-1.57604						-11.5031	-3.50146	-0.244817	1.43293	-4.78834	-1.42181			-11.5031	-3.50146	-0.244817	1.43293	-4.78834	-1.42181		0.448339		3.49072	1.28634	0.409991
B8A9X1	8.87535	9.41943	7.67899	8.09513	9.67698	2.81145	3	3	6			-0.355463	0.768126	-1.51359	-1.27271	0.489975	-6.44275		-1.38774						-0.771856	1.59776	-2.98347	-2.54698	0.988492	-13.2048			-0.771856	1.59776	-2.98347	-2.54698	0.988492	-13.2048		0.175438		-4.20191	1.32173	0.400056
B8AD72	8.61817	9.47462	6.77228	9.23666	10.6774	8.72253	3	3	6			-0.612647	0.823311	-2.4203	-0.131188	1.49036	-0.531668		-0.230354						-1.33031	1.71255	-4.7707	-0.262536	3.00671	-1.08969			-1.33031	1.71255	-4.7707	-0.262536	3.00671	-1.08969		0.616838		2.01431	1.24599	0.421619
B8AE67	8.80542	8.42278	10.9767	8.2241	8.46344	8.18448	3	3	6			-0.425391	-0.228527	1.78413	-1.14375	-0.723562	-1.06972		-0.301137						-0.923699	-0.475355	3.51674	-2.28889	-1.45974	-2.19246			-0.923699	-0.475355	3.51674	-2.28889	-1.45974	-2.19246		0.0665253		-2.68626	2.89308	0.134616
B8AEH1	10.0782	9.79938	7.98937	8.86916	7.6647	10.8568	3	3	6			0.847338	1.14807	-1.20321	-0.498686	-1.52231	1.60261		0.0623027						1.83992	2.38808	-2.37167	-0.99798	-3.07116	3.28465			1.83992	2.38808	-2.37167	-0.99798	-3.07116	3.28465		0.78461		-0.880271	0.449254	0.732422
B8AIM8	8.89642	8.71768	10.8605	8.94471	8.7498	9.23345	3	3	6			-0.334389	0.0663693	1.66797	-0.423136	-0.437203	-0.0207505		0.0864763						-0.726097	0.138053	3.28776	-0.846787	-0.882028	-0.0425293			-0.726097	0.138053	3.28776	-0.846787	-0.882028	-0.0425293		0.0961796		-1.49036	1.74133	0.299093
B8AJL3	7.97602	9.0941	9.62812	9.61276	9.51331	9.13981	3	3	6			-1.25479	0.442797	0.43554	0.24491	0.326308	-0.114395		0.0133946						-2.72467	0.921051	0.858502	0.490119	0.658306	-0.23446			-2.72467	0.921051	0.858502	0.490119	0.658306	-0.23446		0.0982607		0.619694	0.638534	0.642366
B8AJT9	4.29469	10.3184	9.88492	9.59991	5.75822	8.45389	3	3	6			-4.93612	1.66712	0.692341	0.232065	-3.42878	-0.800314		-1.09561						-10.7183	3.46774	1.36469	0.464413	-6.91735	-1.64029			-10.7183	3.46774	1.36469	0.464413	-6.91735	-1.64029		0.395805		-0.73577	0.170227	0.888703
B8APC7	9.66897	9.22149	7.92398	9.37217	10.7287	9.72206	3	3	6			0.438161	0.570183	-1.2686	0.0043207	1.54168	0.467854		0.292267						0.951428	1.18602	-2.50056	0.00864667	3.11024	0.958894			0.951428	1.18602	-2.50056	0.00864667	3.11024	0.958894		0.744286		1.4803	1.39325	0.380705
B8ARI7	8.8644	9.37134	9.58776	9.74888	8.74571	9.63903	3	3	6			-0.36641	0.720034	0.395182	0.381033	-0.441297	0.384831		0.178895						-0.795626	1.49773	0.778951	0.76253	-0.890288	0.788734			-0.795626	1.49773	0.778951	0.76253	-0.890288	0.788734		0.804173		-0.273358	0.376051	0.770544
B8ARW2	7.02425	8.69436	11.4141	12.3914	8.80655	8.73139	3	3	6			-2.20656	0.0430508	2.22147	3.02353	-0.380455	-0.522815		0.363037						-4.79135	0.0895489	4.37879	6.05075	-0.767544	-1.07154			-4.79135	0.0895489	4.37879	6.05075	-0.767544	-1.07154		0.870299		1.51156	0.535081	0.69012
B8AW64	9.38003	10.6971	8.17817	7.8107	9.87484	9.39253	3	3	6			0.149216	2.04575	-1.01441	-1.55715	0.687838	0.13833		0.0749288						0.324008	4.25531	-1.99953	-3.11619	1.38767	0.283515			0.324008	4.25531	-1.99953	-3.11619	1.38767	0.283515		0.710713		-1.3416	0.768946	0.586846
B8AWM1	12.6522	11.1762	6.63448	8.60648	7.97401	12.0411	3	3	6			3.4214	2.52493	-2.5581	-0.761369	-1.21299	2.78694		0.700136						7.42928	5.25204	-5.04232	-1.52367	-2.44713	5.71201			7.42928	5.25204	-5.04232	-1.52367	-2.44713	5.71201		0.620563		-1.96593	0.529012	0.693029
B8AX51	5.56809	4.39595	7.96711	4.44831	8.52974	9.51157	3	3	6			-3.66272	-4.25535	-1.22547	-4.91954	-0.657262	0.257372		-2.4105						-7.95327	-8.85146	-2.41554	-9.84508	-1.32598	0.5275			-7.95327	-8.85146	-2.41554	-9.84508	-1.32598	0.5275		0.568387		2.8589	1.02619	0.491005
B8AY58	13.8599	10.6744	9.59184	10.9489	13.0291	9.38741	3	3	6			4.62911	2.02306	0.399263	1.58103	3.84206	0.133212		2.10129						10.0517	4.20812	0.786996	3.16399	7.7511	0.273026			10.0517	4.20812	0.786996	3.16399	7.7511	0.273026		0.786342		-1.28623	0.454356	0.729836
B8AYH1	9.70475	7.00876	7.65578	8.09966	8.864	8.03853	3	3	6			0.473938	-1.64254	-1.5368	-1.26818	-0.323005	-1.21567		-0.918709						1.02912	-3.41661	-3.02921	-2.53792	-0.651641	-2.49158			1.02912	-3.41661	-3.02921	-2.53792	-0.651641	-2.49158		0.320588		-0.0881436	0.0627755	0.95742
B8B0I8	7.87952	9.34727	10.7645	9.22407	9.4599	9.95539	3	3	6			-1.35129	0.69596	1.57188	-0.143774	0.272898	0.701186		0.291143						-2.93421	1.44765	3.09837	-0.287723	0.550554	1.43712			-2.93421	1.44765	3.09837	-0.287723	0.550554	1.43712		0.142202		0.0293824	0.0171237	0.988201
B8B0R8	8.39395	9.2538	9.25958	8.40791	8.20594	12.7254	3	3	6			-0.836864	0.602493	0.0670013	-0.959943	-0.981065	3.47116		0.227131						-1.81718	1.25323	0.132068	-1.92106	-1.97924	7.11436			-1.81718	1.25323	0.132068	-1.92106	-1.97924	7.11436		0.161995		1.21531	0.475066	0.719434
B8B2R1	10.9116	8.26566	10.6962	7.34243	6.70984	10.7249	3	3	6			1.6808	-0.385645	1.50361	-2.02542	-2.47716	1.47065		-0.0388602						3.64972	-0.802171	2.96379	-4.0533	-4.99752	3.01419			3.64972	-0.802171	2.96379	-4.0533	-4.99752	3.01419		0.461165		-3.94932	2.04427	0.242445
B8B2R4	7.74866	8.46744	8.69992	8.87501	10.2531	9.50666	3	3	6			-1.48215	-0.183865	-0.492658	-0.492836	1.06613	0.252462		-0.222152						-3.21836	-0.382452	-0.971088	-0.986272	2.15086	0.517436			-3.21836	-0.382452	-0.971088	-0.986272	2.15086	0.517436		0.952793		2.08464	2.54622	0.171203
B8B4K9	10.3804	9.01536	8.29476	10.5604	9.80584	3.14253	3	3	6			1.14954	0.364052	-0.897819	1.19258	0.618836	-6.11167		-0.614081						2.49613	0.757256	-1.76971	2.38661	1.24846	-12.5262			2.49613	0.757256	-1.76971	2.38661	1.24846	-12.5262		0.125189		-3.45828	0.9344	0.52326
B8B7Q4	7.22978	7.69655	10.7467	7.31125	10.1585	10.0711	3	3	6			-2.00103	-0.954757	1.55411	-2.0566	0.971478	0.816858		-0.278325						-4.34507	-1.98597	3.06333	-4.11571	1.9599	1.6742			-4.34507	-1.98597	3.06333	-4.11571	1.9599	1.6742		0.901398		0.928697	0.379859	0.768513
B8B8C5	6.50384	8.70266	9.29398	8.63525	10.2182	8.1221	3	3	6			-2.72697	0.0513504	0.1014	-0.732601	1.03119	-1.1321		-0.567954						-5.92138	0.106813	0.199872	-1.4661	2.08037	-2.3203			-5.92138	0.106813	0.199872	-1.4661	2.08037	-2.3203		0.613633		1.30289	0.688283	0.620592
B8B9K6	10.2535	10.5104	9.18088	10.3758	9.87848	10.55	3	3	6			1.02268	1.85906	-0.0116984	1.00795	0.691475	1.29577		0.977541						2.22066	3.86699	-0.0230589	2.01713	1.39501	2.65577			2.22066	3.86699	-0.0230589	2.01713	1.39501	2.65577		0.188778		0.0011055	0.00101007	0.9993
B8BAI9	12.5412	9.18522	10.1906	10.9283	9.44427	11.0756	3	3	6			3.31041	0.533915	0.997988	1.56045	0.257265	1.82141		1.41357						7.18825	1.11058	1.96716	3.1228	0.519015	3.73309			7.18825	1.11058	1.96716	3.1228	0.519015	3.73309		0.424258		-0.963696	0.565394	0.675771
B8BBN7	9.18926	8.47614	11.3308	8.95047	8.55551	8.06985	3	3	6			-0.0415563	-0.175168	2.13823	-0.417379	-0.631496	-1.18435		-0.0519537						-0.0902359	-0.364364	4.21471	-0.835268	-1.274	-2.4274			-0.0902359	-0.364364	4.21471	-0.835268	-1.274	-2.4274		0.18599		-2.76559	2.73378	0.150332
B8BDQ4	9.68463	11.613	9.38636	9.96042	11.2486	10.59	3	3	6			0.453813	2.9617	0.193781	0.592574	2.06163	1.33582		1.26655						0.985416	6.16056	0.381966	1.18587	4.15921	2.73785			0.985416	6.16056	0.381966	1.18587	4.15921	2.73785		0.359573		0.184998	0.102218	0.9316
B8BDV1	10.7812	10.9281	8.72366	11.1631	10.5452	12.2073	3	3	6			1.55038	2.27684	-0.468916	1.79524	1.35815	2.95312		1.57747						3.36652	4.736	-0.924291	3.59266	2.73999	6.05259			3.36652	4.736	-0.924291	3.59266	2.73999	6.05259		0.506632		1.73567	1.2219	0.428718
B8BHF1	9.52489	7.86437	9.67322	9.60261	9.20518	8.12933	3	3	6			0.294082	-0.786935	0.480644	0.234758	0.0181773	-1.12487		-0.147357						0.638572	-1.63689	0.947407	0.469803	0.0366716	-2.30548			0.638572	-1.63689	0.947407	0.469803	0.0366716	-2.30548		0.943781		-0.582701	0.623723	0.648994
B8BJ22	10.1525	9.50291	9.86267	11.253	9.96852	9.95868	3	3	6			0.921726	0.851604	0.670091	1.88517	0.781518	0.704481		0.969099						2.00145	1.7714	1.32083	3.77264	1.57666	1.44388			2.00145	1.7714	1.32083	3.77264	1.57666	1.44388		0.130969		0.566501	0.975816	0.508452
B8YEK4	10.3623	9.09777	11.4505	11.115	10.9961	11.0359	3	3	6			1.13146	0.446462	2.25796	1.74713	1.80912	1.7817		1.52897						2.45687	0.928674	4.45072	3.49639	3.64977	3.65169			2.45687	0.928674	4.45072	3.49639	3.64977	3.65169		0.00507891		0.9872	1.2004	0.435155
B8YIE8	9.38083	11.5315	9.59012	13.4634	10.4796	12.2531	3	3	6			0.150016	2.88017	0.397542	4.09555	1.29257	2.99891		1.96913						0.325747	5.99098	0.783603	8.19609	2.60768	6.14644			0.325747	5.99098	0.783603	8.19609	2.60768	6.14644		0.893206		3.2833	1.99982	0.250031
B9DFG3	11.171	10.225	9.80949	11.4711	10.4723	11.894	3	3	6			1.94018	1.57366	0.616918	2.10322	1.28528	2.63982		1.69318						4.21292	3.27333	1.21602	4.209	2.59297	5.41047			4.21292	3.27333	1.21602	4.209	2.59297	5.41047		0.919379		1.17005	1.37276	0.386153
B9EUM5	10.5193	9.44216	11.678	11.9726	11.0775	10.4452	3	3	6			1.28853	0.790848	2.48541	2.60477	1.89048	1.19102		1.70851						2.79793	1.64502	4.89904	5.21272	3.81392	2.44107			2.79793	1.64502	4.89904	5.21272	3.81392	2.44107		0.827362		0.708572	0.738362	0.59942
B9EXM2	9.93106	9.20606	10.4629	10.7275	10.7998	9.83764	3	3	6			0.70025	0.554755	1.27033	1.35965	1.61284	0.583441		1.01355						1.52053	1.15393	2.50398	2.72095	3.25381	1.1958			1.52053	1.15393	2.50398	2.72095	3.25381	1.1958		0.598631		0.664037	1.25714	0.418371
B9EY52	9.17784	9.73613	9.93176	9.40973	9.44752	5.94549	3	3	6			-0.0529695	1.08482	0.73918	0.0418825	0.260512	-3.30871		-0.20588						-0.115019	2.25652	1.45701	0.083816	0.525567	-6.7814			-0.115019	2.25652	1.45701	0.083816	0.525567	-6.7814		0.159606		-3.25684	1.95971	0.25708
B9EYD3	11.9274	12.1617	8.83472	8.97613	9.68143	9.13342	3	3	6			2.6966	3.51039	-0.357853	-0.391713	0.494427	-0.120778		0.971845						5.85542	7.30188	-0.705372	-0.783904	0.997474	-0.247541			5.85542	7.30188	-0.705372	-0.783904	0.997474	-0.247541		0.0877106		-4.16197	2.52366	0.173901
B9EYZ1	8.34372	7.12794	6.55718	7.51783	5.65326	7.3267	3	3	6			-0.887094	-1.52336	-2.6354	-1.85002	-3.53374	-1.9275		-2.05952						-1.92625	-3.16871	-5.19469	-3.7023	-7.1291	-3.95053			-1.92625	-3.16871	-5.19469	-3.7023	-7.1291	-3.95053		0.854156		-1.49743	1.46471	0.362308
B9F058	9.77284	10.5122	8.77742	8.98945	11.0089	8.99027	3	3	6			0.54203	1.86094	-0.415157	-0.378397	1.82191	-0.263928		0.5279						1.17697	3.8709	-0.818326	-0.757255	3.67559	-0.540937			1.17697	3.8709	-0.818326	-0.757255	3.67559	-0.540937		0.939906		-0.617379	0.375243	0.770975
B9F1C0	11.3856	10.139	9.48649	11.1127	11.4325	9.59526	3	3	6			2.15478	1.48773	0.293916	1.74485	2.24548	0.341055		1.37797						4.67892	3.0946	0.579344	3.49183	4.53012	0.699013			4.67892	3.0946	0.579344	3.49183	4.53012	0.699013		0.957564		0.122703	0.0825311	0.944399
B9F2U5	9.17048	8.92822	9.44041	10.127	9.69723	10.6031	3	3	6			-0.0603367	0.276915	0.247835	0.759115	0.510223	1.34887		0.51377						-0.131016	0.576005	0.488513	1.51915	1.02934	2.76458			-0.131016	0.576005	0.488513	1.51915	1.02934	2.76458		0.313115		1.45986	4.05126	0.0603182
B9F2Y7	11.3645	10.7691	12.2824	11.8936	10.8189	12.4826	3	3	6			2.13365	2.11779	3.08985	2.52576	1.6319	3.2284		2.45456						4.63303	4.40516	6.09046	5.05459	3.29225	6.61681			4.63303	4.40516	6.09046	5.05459	3.29225	6.61681		0.464139		-0.0550011	0.0553268	0.962376
B9F3B6	10.8902	5.51191	4.55863	10.1223	7.26397	8.32292	3	3	6			1.65938	-3.1394	-4.63394	0.754462	-1.92303	-0.931283		-1.36897						3.60319	-6.53018	-9.13406	1.50984	-3.87959	-1.90872			3.60319	-6.53018	-9.13406	1.50984	-3.87959	-1.90872		0.2821		2.5942	0.812166	0.569526
B9F4I8	6.64296	9.70131	9.94999	9.89701	11.1675	8.96829	3	3	6			-2.58785	1.05	0.75741	0.529166	1.98054	-0.28591		0.240559						-5.61929	2.18408	1.49295	1.05898	3.99561	-0.58599			-5.61929	2.18408	1.49295	1.05898	3.99561	-0.58599		0.448044		2.13695	1.02219	0.49237
B9F655	7.13535	6.71205	6.47918	6.48781	7.3812	5.8813	3	3	6			-2.09546	-1.93926	-2.7134	-2.88004	-1.80581	-3.3729		-2.46781						-4.55011	-4.03381	-5.34843	-5.76359	-3.6431	-6.91297			-4.55011	-4.03381	-5.34843	-5.76359	-3.6431	-6.91297		0.275012		-0.79577	1.04881	0.483365
B9F676	9.40848	9.21718	10.0336	8.92573	7.5331	10.5768	3	3	6			0.177666	0.565875	0.840983	-0.442115	-1.65391	1.32257		0.135178						0.385786	1.17706	1.65768	-0.88477	-3.33665	2.71068			0.385786	1.17706	1.65768	-0.88477	-3.33665	2.71068		0.0853624		-1.57709	1.22034	0.429182
B9F7C8	11.683	9.87234	11.466	11.5291	12.8468	11.9519	3	3	6			2.45223	1.22103	2.27345	2.16129	3.6598	2.69767		2.41091						5.32479	2.53983	4.48124	4.32521	7.38341	5.52903			5.32479	2.53983	4.48124	4.32521	7.38341	5.52903		0.92432		1.63059	2.0001	0.249982
B9FAF3	10.6377	13.7345	10.5718	11.5575	10.5454	9.78462	3	3	6			1.4069	5.08319	1.37918	2.18966	1.35835	0.530416		1.99128						3.05496	10.5734	2.71852	4.382	2.74037	1.08712			3.05496	10.5734	2.71852	4.382	2.74037	1.08712		0.241923		-2.71247	1.40575	0.377421
B9FDB8	9.17665	8.96754	8.49133	8.8301	9.28369	7.72165	3	3	6			-0.0541657	0.316236	-0.701245	-0.537745	0.0966853	-1.53256		-0.402132						-0.117616	0.657795	-1.38224	-1.07614	0.195056	-3.14107			-0.117616	0.657795	-1.38224	-1.07614	0.195056	-3.14107		0.544439		-1.06003	1.30439	0.404891
B9FDE0	4.40674	7.84593	8.66647	10.0891	9.30916	8.59798	3	3	6			-4.82407	-0.805378	-0.526105	0.721205	0.122153	-0.656224		-0.994737						-10.475	-1.67525	-1.03702	1.44329	0.246436	-1.34497			-10.475	-1.67525	-1.03702	1.44329	0.246436	-1.34497		0.131417		4.51069	2.14895	0.225477
B9FFA3	10.7367	8.65166	11.1213	11.1109	10.4032	11.7752	3	3	6			1.50593	0.000354551	1.9287	1.74303	1.21622	2.52104		1.48588						3.26999	0.000737493	3.8017	3.48818	2.45365	5.16702			3.26999	0.000737493	3.8017	3.48818	2.45365	5.16702		0.613657		1.34547	1.32473	0.399224
B9FGV7	5.01569	9.73037	8.35125	10.4452	9.1406	8.44985	3	3	6			-4.21512	1.07906	-0.841329	1.07737	-0.0464053	-0.804352		-0.625128						-9.15276	2.24453	-1.65836	2.15606	-0.0936196	-1.64857			-9.15276	2.24453	-1.65836	2.15606	-0.0936196	-1.64857		0.196677		2.99349	1.17393	0.443211
B9FHF3	9.92787	10.0163	7.07393	10.6268	10.562	9.00048	3	3	6			0.697054	1.36494	-2.11865	1.25896	1.37495	-0.253723		0.387255						1.51359	2.83919	-4.17612	2.51945	2.77388	-0.520021			1.51359	2.83919	-4.17612	2.51945	2.77388	-0.520021		0.389437		1.53221	0.842728	0.557588
B9FHH2	7.52419	9.50331	8.72383	7.27417	8.5567	6.48565	3	3	6			-1.70662	0.852002	-0.468746	-2.09368	-0.630307	-2.76855		-1.13598						-3.70578	1.77223	-0.923954	-4.18991	-1.2716	-5.67431			-3.70578	1.77223	-0.923954	-4.18991	-1.2716	-5.67431		0.801481		-2.75944	2.01084	0.248128
B9FI63	9.83878	11.1107	7.50795	10.8721	10.9719	12.6352	3	3	6			0.607966	2.45937	-1.68462	1.50421	1.7849	3.38104		1.34214						1.32014	5.11568	-3.3206	3.01026	3.60092	6.92964			1.32014	5.11568	-3.3206	3.01026	3.60092	6.92964		0.40015		3.4752	1.88041	0.271606
B9FJ61	6.78529	5.11424	7.51791	7.1416	7.31442	6.28614	3	3	6			-2.44552	-3.53707	-1.67467	-2.22625	-1.87258	-2.96806		-2.45403						-5.31024	-7.35736	-3.30098	-4.45522	-3.77781	-6.08322			-5.31024	-7.35736	-3.30098	-4.45522	-3.77781	-6.08322		0.508917		0.550779	0.503406	0.705439
B9FK36	10.0764	10.5238	11.2033	11.253	11.3436	11.9946	3	3	6			0.845602	1.87245	2.01071	1.88517	2.15657	2.7404		1.91848						1.83615	3.89484	3.96335	3.77264	4.35074	5.61661			1.83615	3.89484	3.96335	3.77264	4.35074	5.61661		0.756745		1.34855	2.30527	0.202323
B9FKM7	11.6532	10.69	11.0591	10.3232	9.77202	9.83033	3	3	6			2.42244	2.03869	1.86656	0.95532	0.585013	0.576123		1.40736						5.26011	4.24063	3.67922	1.9118	1.18023	1.1808			5.26011	4.24063	3.67922	1.9118	1.18023	1.1808		0.434499		-2.96904	7.71765	0.00475069
B9FKP6	8.89963	9.18723	10.3675	9.24225	10.4407	8.30656	3	3	6			-0.331184	0.535921	1.17495	-0.125603	1.25366	-0.947639		0.260016						-0.719136	1.11476	2.31596	-0.251358	2.52917	-1.94224			-0.719136	1.11476	2.31596	-0.251358	2.52917	-1.94224		0.628578		-0.792004	0.640908	0.641309
B9FKW9	11.8775	10.2488	8.25875	9.71125	11.5879	11.1226	3	3	6			2.64666	1.59745	-0.933823	0.343406	2.40087	1.86843		1.3205						5.747	3.32282	-1.84068	0.687231	4.84359	3.82946			5.747	3.32282	-1.84068	0.687231	4.84359	3.82946		0.476419		0.710383	0.330203	0.795424
B9FL70	10.8853	10.7115	10.2417	10.24	9.16641	10.3391	3	3	6			1.6545	2.06019	1.04917	0.872109	-0.0205908	1.08487		1.11671						3.59261	4.28535	2.06804	1.74528	-0.0415407	2.2235			3.59261	4.28535	2.06804	1.74528	-0.0415407	2.2235		0.948922		-2.00625	3.28653	0.102484
B9FM64	15.1203	10.3262	9.46205	10.6835	9.6487	12.4479	3	3	6			5.88951	1.6749	0.269475	1.31567	0.461694	3.19371		2.13416						12.7885	3.48391	0.531168	2.63295	0.931438	6.54569			12.7885	3.48391	0.531168	2.63295	0.931438	6.54569		0.336816		-2.23118	0.710687	0.611029
B9FMJ3	9.67537	10.7788	10.0165	9.89392	8.81429	11.1551	3	3	6			0.444562	2.12751	0.823953	0.526076	-0.372711	1.90087		0.908376						0.965328	4.42538	1.62411	1.05279	-0.75192	3.89594			0.965328	4.42538	1.62411	1.05279	-0.75192	3.89594		0.761448		-0.939334	0.704077	0.613835
B9FMX4	8.07607	8.95855	10.8353	9.83876	8.54928	9.95035	3	3	6			-1.15475	0.307246	1.64268	0.470915	-0.637721	0.696149		0.220755						-2.50743	0.639094	3.23793	0.942404	-1.28656	1.4268			-2.50743	0.639094	3.23793	0.942404	-1.28656	1.4268		0.40384		-0.0956508	0.0567331	0.961439
B9FS33	10.3633	5.49825	10.1866	12.0767	9.32874	11.2701	3	3	6			1.13245	-3.15306	0.994032	2.70887	0.141737	2.01586		0.639981						2.45901	-6.5586	1.95936	5.42104	0.285946	4.13162			2.45901	-6.5586	1.95936	5.42104	0.285946	4.13162		0.434856		3.99295	1.76671	0.293877
B9FS74	9.51005	9.13609	11.1404	10.8783	11.5293	10.7772	3	3	6			0.279239	0.484787	1.94781	1.51043	2.34233	1.52297		1.34793						0.606344	1.00839	3.83936	3.02271	4.7255	3.12142			0.606344	1.00839	3.83936	3.02271	4.7255	3.12142		0.45476		1.80518	2.3671	0.193835
B9FSC8	7.63038	7.81692	5.5291	8.76278	9.43352	10.1317	3	3	6			-1.60044	-0.834387	-3.66347	-0.605067	0.246518	0.877526		-0.929887						-3.47521	-1.73559	-7.22115	-1.21087	0.497334	1.79854			-3.47521	-1.73559	-7.22115	-1.21087	0.497334	1.79854		0.449466		4.50565	3.82922	0.070354
B9FSH5	9.70943	11.2246	10.3882	10.0314	8.16862	10.5759	3	3	6			0.478616	2.5733	1.19566	0.663509	-1.01838	1.32171		0.869068						1.03927	5.35265	2.35678	1.32783	-2.05452	2.70893			1.03927	5.35265	2.35678	1.32783	-2.05452	2.70893		0.897147		-2.25549	1.72703	0.302073
B9FTR1	11.4026	11.6019	10.9012	9.75849	11.5283	9.17637	3	3	6			2.17177	2.9506	1.70859	0.390642	2.34125	-0.0778297		1.58084						4.71581	6.13748	3.36784	0.78176	4.72333	-0.159517			4.71581	6.13748	3.36784	0.78176	4.72333	-0.159517		0.444595		-2.95852	2.68015	0.156025
B9FUF9	12.2462	11.4199	11.4035	12.919	11.3266	13.268	3	3	6			3.01542	2.7686	2.21097	3.55118	2.13959	4.01375		2.94992						6.54773	5.7589	4.35808	7.1067	4.31649	8.22643			6.54773	5.7589	4.35808	7.1067	4.31649	8.22643		0.465472		0.994969	1.01412	0.495131
B9FXV5	9.83799	10.5516	12.0794	11.841	12.0137	11.2145	3	3	6			0.607178	1.90031	2.88684	2.47317	2.82674	1.9603		2.10909						1.31843	3.95278	5.69031	4.94935	5.70276	4.01775			1.31843	3.95278	5.69031	4.94935	5.70276	4.01775		0.256381		1.23611	1.26827	0.415157
B9G125	9.96651	6.04503	7.87461	7.9194	7.81833	7.06156	3	3	6			0.735693	-2.60628	-1.31796	-1.44845	-1.36868	-2.19264		-1.36639						1.59749	-5.42126	-2.59787	-2.89866	-2.76122	-4.49395			1.59749	-5.42126	-2.59787	-2.89866	-2.76122	-4.49395		0.13846		-1.24407	0.766754	0.587739
B9G2A8	12.5269	11.584	12.3444	12.719	11.6453	12.3964	3	3	6			3.29608	2.93272	3.15183	3.3512	2.45825	3.14224		3.05539						7.15714	6.10027	6.21264	6.70648	4.95936	6.44021			7.15714	6.10027	6.21264	6.70648	4.95936	6.44021		0.551022		-0.454666	0.9553	0.515734
B9G2X9	11.3421	10.8676	10.4634	11.9751	9.29483	9.20845	3	3	6			2.11132	2.21628	1.27084	2.60728	0.107822	-0.0457485		1.37797						4.58454	4.61003	2.50499	5.21775	0.217525	-0.0937643			4.58454	4.61003	2.50499	5.21775	0.217525	-0.0937643		0.282156		-2.11935	1.65551	0.317425
B9G300	10.978	11.2077	12.4966	13.476	11.2472	10.8672	3	3	6			1.74718	2.55638	3.30398	4.10814	2.06015	1.613		2.5648						3.79385	5.31746	6.51254	8.22129	4.15622	3.30594			3.79385	5.31746	6.51254	8.22129	4.15622	3.30594		0.424015		0.0198646	0.0126344	0.991281
B9G3M6	12.104	11.2002	12.0511	14.2922	8.61982	14.6313	3	3	6			2.8732	2.54892	2.85856	4.9244	-0.567189	5.37709		3.0025						6.23889	5.30194	5.63458	9.85481	-1.14427	11.0207			6.23889	5.30194	5.63458	9.85481	-1.14427	11.0207		0.00996564		0.851932	0.24026	0.846593
B9G434	3.3553	8.83971	9.79159	10.8917	8.28276	10.4015	3	3	6			-5.87551	0.188401	0.599009	1.52386	-0.904241	1.14732		-0.553528						-12.7582	0.391888	1.18072	3.04958	-1.82425	2.3515			-12.7582	0.391888	1.18072	3.04958	-1.82425	2.3515		0.203549		4.92079	1.47183	0.360524
B9G4M9	11.325	7.42752	10.6897	9.6553	9.01823	10.0814	3	3	6			2.09421	-1.22378	1.49716	0.28745	-0.168777	0.827148		0.552234						4.5474	-2.54557	2.95108	0.575251	-0.340497	1.69529			4.5474	-2.54557	2.95108	0.575251	-0.340497	1.69529		0.139684		-1.00762	0.568206	0.674455
B9G5N1	10.701	9.71273	10.1815	12.368	10.1904	11.3839	3	3	6			1.47023	1.06143	0.988948	3.00011	1.00344	2.12972		1.60898						3.19248	2.20785	1.94934	6.00388	2.02437	4.36498			3.19248	2.20785	1.94934	6.00388	2.02437	4.36498		0.194243		1.68119	2.06652	0.238735
B9G5Y5	10.4254	9.8996	10.9527	10.1747	9.64288	7.86134	3	3	6			1.19461	1.24829	1.76009	0.806828	0.455877	-1.39287		0.678806						2.594	2.59654	3.46935	1.61464	0.919703	-2.85476			2.594	2.59654	3.46935	1.61464	0.919703	-2.85476		0.0843456		-2.99344	3.28621	0.102507
B9G8P1	9.58851	11.1729	10.6951	11.1494	13.3882	11.0526	3	3	6			0.357696	2.52156	1.50248	1.78158	4.20115	1.79843		2.02715						0.776705	5.24503	2.96156	3.56534	8.47554	3.686			0.776705	5.24503	2.96156	3.56534	8.47554	3.686		0.777836		2.24786	1.56374	0.338273
B9G934	11.3782	7.95646	8.87728	10.9384	9.03111	10.1941	3	3	6			2.14743	-0.694844	-0.315293	1.57056	-0.155897	0.939939		0.581982						4.66295	-1.44533	-0.621481	3.14303	-0.314511	1.92646			4.66295	-1.44533	-0.621481	3.14303	-0.314511	1.92646		0.437506		0.719611	0.402988	0.75629
B9G9L9	7.30305	8.86016	9.01098	8.32697	10.4501	10.145	3	3	6			-1.92776	0.208849	-0.181602	-1.04088	1.26307	0.890838		-0.131247						-4.18597	0.434421	-0.357959	-2.08303	2.54817	1.82583			-4.18597	0.434421	-0.357959	-2.08303	2.54817	1.82583		0.991616		2.13349	1.50756	0.351706
B9GDE5	12.4466	10.6333	10.0971	10.0474	11.8024	11.5733	3	3	6			3.21575	1.98196	0.904533	0.679549	2.61535	2.31907		1.9527						6.98273	4.12263	1.78294	1.35993	5.2763	4.75306			6.98273	4.12263	1.78294	1.35993	5.2763	4.75306		0.799949		-0.499669	0.304805	0.809552
B9GE13	12.6751	10.8485	11.6707	11.6758	10.9147	12.719	3	3	6			3.44424	2.19724	2.47812	2.30798	1.72768	3.4648		2.60334						7.47886	4.57042	4.88468	4.61877	3.48548	7.10132			7.47886	4.57042	4.88468	4.61877	3.48548	7.10132		0.853834		-0.576133	0.506662	0.703849
B9X287	12.159	7.81224	11.0855	9.90444	9.30811	10.926	3	3	6			2.92814	-0.839066	1.89296	0.536591	0.121106	1.6718		1.05192						6.35821	-1.74532	3.73126	1.07384	0.244324	3.42645			6.35821	-1.74532	3.73126	1.07384	0.244324	3.42645		0.274978		-1.19984	0.58875	0.664919
C0LT23	11.0176	9.32355	8.66622	11.2022	8.73728	11.4352	3	3	6			1.78676	0.672243	-0.526353	1.83434	-0.449724	2.181		0.916377						3.87979	1.39832	-1.03751	3.67091	-0.907289	4.47009			3.87979	1.39832	-1.03751	3.67091	-0.907289	4.47009		0.835872		0.997701	0.571054	0.673125
C0SQ89	12.3784	10.246	11.6634	10.7912	11.3211	11.4854	3	3	6			3.14762	1.59472	2.47085	1.4234	2.13408	2.23122		2.16698						6.83477	3.31714	4.87034	2.84853	4.30536	4.57303			6.83477	3.31714	4.87034	2.84853	4.30536	4.57303		0.43404		-1.09844	1.345	0.393655
C7IW64	10.8223	12.0563	9.80545	11.1767	10.445	11.978	3	3	6			1.59144	3.40496	0.612876	1.80882	1.25801	2.72376		1.89998						3.45567	7.08257	1.20805	3.61985	2.53795	5.5825			3.45567	7.08257	1.20805	3.61985	2.53795	5.5825		0.42657		-0.00199508	0.00111928	0.999224
C7J0A2	9.5938	12.0644	9.17555	11.003	9.42335	10.1481	3	3	6			0.362989	3.41307	-0.0170277	1.63518	0.236342	0.893893		1.08741						0.788199	7.09943	-0.0335636	3.27235	0.476805	1.83209			0.788199	7.09943	-0.0335636	3.27235	0.476805	1.83209		0.227444		-0.75761	0.381902	0.767425
C7J0P3	9.10203	8.03733	10.8661	12.0215	7.86944	7.37972	3	3	6			-0.128784	-0.61398	1.67354	2.65369	-1.31757	-1.87448		0.0654038						-0.279644	-1.27712	3.29875	5.31061	-2.6581	-3.84185			-0.279644	-1.27712	3.29875	5.31061	-2.6581	-3.84185		0.378812		-0.977111	0.368114	0.774795
C7J2Z1	8.18849	7.67716	6.89506	11.357	10.5271	9.95844	3	3	6			-1.04232	-0.974151	-2.29752	1.98915	1.34008	0.704234		-0.0467536						-2.26331	-2.02631	-4.52868	3.98073	2.70353	1.44337			-2.26331	-2.02631	-4.52868	3.98073	2.70353	1.44337		0.915077		5.64865	7.27788	0.00644375
C7J3A2	9.82141	8.06958	8.25583	11.3623	5.58934	8.50938	3	3	6			0.590595	-0.581723	-0.936746	1.99442	-3.59766	-0.744823		-0.545989						1.28242	-1.21003	-1.84644	3.99128	-7.25805	-1.52656			1.28242	-1.21003	-1.84644	3.99128	-7.25805	-1.52656		0.159099		-1.00643	0.356559	0.781025
C7J6G6	10.1589	10.3831	11.9659	11.2561	11.5815	10.4565	3	3	6			0.92805	1.73175	2.77332	1.8883	2.39448	1.20225		1.81969						2.01518	3.60217	5.46654	3.77891	4.83071	2.46409			2.01518	3.60217	5.46654	3.77891	4.83071	2.46409		0.640484		-0.0033944	0.00303925	0.997896
C7J8E5	9.41051	9.66473	10.7486	10.2055	9.15972	10.4008	3	3	6			0.179702	1.01342	1.55603	0.837701	-0.027285	1.14657		0.784358						0.390208	2.108	3.06713	1.67642	-0.0550457	2.34996			0.390208	2.108	3.06713	1.67642	-0.0550457	2.34996		0.911162		-0.531333	0.637336	0.642899
D0TZF0	8.4475	6.78346	9.201	12.8913	8.30003	8.43596	3	3	6			-0.783316	-1.86785	0.00841945	3.52346	-0.886973	-0.81824		-0.137417						-1.7009	-3.88527	0.0165958	7.05122	-1.78941	-1.67703			-1.7009	-3.88527	0.0165958	7.05122	-1.78941	-1.67703		0.25884		3.05145	1.37345	0.385968
D5A7J3	9.2888	8.19377	9.16078	6.90557	9.83972	10.4594	3	3	6			0.0579843	-0.457535	-0.0317982	-2.46228	0.652718	1.20523		-0.172614						0.125908	-0.951708	-0.062678	-4.92756	1.31682	2.47019			0.125908	-0.951708	-0.062678	-4.92756	1.31682	2.47019		0.0409577		-0.0840257	0.0375603	0.974301
D7UPN3	10.7551	9.48105	9.50934	8.26566	8.8469	8.13725	3	3	6			1.52424	0.829746	0.316762	-1.10219	-0.340104	-1.11696		0.0185841						3.30976	1.72593	0.624377	-2.20572	-0.686139	-2.28927			3.30976	1.72593	0.624377	-2.20572	-0.686139	-2.28927		0.617741		-3.61373	5.77767	0.0182283
D8WUA4	10.4958	7.60474	10.6176	10.2065	9.74116	11.3281	3	3	6			1.26494	-1.04657	1.42498	0.838678	0.554159	2.07386		0.851675						2.74671	-2.17694	2.80881	1.67838	1.11798	4.25049			2.74671	-2.17694	2.80881	1.67838	1.11798	4.25049		0.50853		1.22276	0.843219	0.557398
E0ZS45	6.79299	7.52662	4.3091	7.28411	8.62845	3.21061	3	3	6			-2.43783	-1.12469	-4.88347	-2.08374	-0.558559	-6.0436		-2.85531						-5.29353	-2.33944	-9.62592	-4.17002	-1.12686	-12.3867			-5.29353	-2.33944	-9.62592	-4.17002	-1.12686	-12.3867		0.567232		-0.141568	0.0390676	0.973284
E0ZS48	8.4582	7.62979	8.6887	10.0261	9.28545	7.88356	3	3	6			-0.772611	-1.02151	-0.503872	0.658261	0.0984435	-1.37064		-0.485323						-1.67766	-2.12483	-0.993193	1.31732	0.198603	-2.80921			-1.67766	-2.12483	-0.993193	1.31732	0.198603	-2.80921		0.13315		1.16746	1.28012	0.411761
E3VXF2	9.16902	10.2562	8.90391	7.80142	10.5252	9.39909	3	3	6			-0.0617895	1.6049	-0.288665	-1.56643	1.33822	0.144883		0.195187						-0.134171	3.33832	-0.568994	-3.13477	2.69978	0.296947			-0.134171	3.33832	-0.568994	-3.13477	2.69978	0.296947		0.695627		-0.9244	0.552085	0.682034
F4HW51	10.8975	11.5089	12.6923	11.5015	10.5916	12.012	3	3	6			1.66665	2.85763	3.49969	2.13369	1.40461	2.75776		2.38667						3.61899	5.94408	6.89831	4.26998	2.83371	5.65219			3.61899	5.94408	6.89831	4.26998	2.83371	5.65219		0.822224		-1.23517	1.37516	0.38551
F4HY61	8.77722	8.88509	6.50235	9.92807	8.19889	7.46614	3	3	6			-0.45359	0.233779	-2.69023	0.560226	-0.988118	-1.78806		-0.854333						-0.984931	0.486278	-5.30277	1.12114	-1.99346	-3.66475			-0.984931	0.486278	-5.30277	1.12114	-1.99346	-3.66475		0.789091		0.421449	0.218494	0.859462
F4HYJ7	10.4679	10.0488	10.8875	12.8297	11.8322	12.4967	3	3	6			1.2371	1.39745	1.69495	3.46187	2.64521	3.2425		2.27985						2.68625	2.90681	3.34095	6.92797	5.33655	6.6457			2.68625	2.90681	3.34095	6.92797	5.33655	6.6457		0.26673		3.3254	8.28012	0.00321688
F4I2H2	11.0494	10.7596	11.5344	12.0126	11.6725	11.9484	3	3	6			1.81856	2.10833	2.34177	2.64471	2.48551	2.6942		2.34885						3.94884	4.38549	4.61592	5.29264	5.01435	5.52193			3.94884	4.38549	4.61592	5.29264	5.01435	5.52193		0.720263		0.959556	5.86221	0.0171909
F4I8S3	15.3743	10.2954	11.8814	14.3188	14.0755	14.4637	3	3	6			6.14345	1.64412	2.68884	4.95091	4.88847	5.20951		4.25422						13.34	3.41989	5.30003	9.90785	9.86218	10.6772			13.34	3.41989	5.30003	9.90785	9.86218	10.6772		0.0149936		2.79579	1.13509	0.455306
F4I9Q5	12.544	11.8236	12.4299	12.1493	11.5909	11.7737	3	3	6			3.31321	3.1723	3.23733	2.78145	2.40386	2.51951		2.90461						7.19434	6.59862	6.38116	5.5663	4.84964	5.16389			7.19434	6.59862	6.38116	5.5663	4.84964	5.16389		0.842662		-1.53143	6.84585	0.00869348
F4IDQ6	11.6888	9.07409	10.6324	10.4577	9.66936	10.6396	3	3	6			2.45801	0.422781	1.43987	1.08984	0.482358	1.38541		1.21304						5.33734	0.879416	2.83816	2.18101	0.973127	2.83948			5.33734	0.879416	2.83816	2.18101	0.973127	2.83948		0.304308		-1.02044	0.980657	0.506749
F4IE66	8.89251	12.1524	9.34979	12.6392	9.68461	9.63965	3	3	6			-0.3383	3.50107	0.157213	3.27136	0.497603	0.385446		1.24573						-0.734589	7.2825	0.309885	6.5467	1.00388	0.789994			-0.734589	7.2825	0.309885	6.5467	1.00388	0.789994		0.718514		0.494262	0.180028	0.882686
F4IED2	10.2555	9.04911	7.75995	10.3595	10.426	2.86321	3	3	6			1.02469	0.397806	-1.43262	0.991682	1.23895	-6.391		-0.695083						2.22502	0.827467	-2.82387	1.98457	2.49949	-13.0987			2.22502	0.827467	-2.82387	1.98457	2.49949	-13.0987		0.15933		-2.94776	0.713479	0.609848
F4IHS2	10.3424	12.2015	12.2148	10.9117	11.2968	12.8469	3	3	6			1.1116	3.55014	3.02226	1.54384	2.1098	3.59266		2.48838						2.41373	7.38457	5.95724	3.08957	4.25638	7.36337			2.41373	7.38457	5.95724	3.08957	4.25638	7.36337		0.853861		-0.348739	0.206082	0.866888
F4IJV4	11.2355	10.5183	10.1602	12.2059	10.5034	10.5212	3	3	6			2.00472	1.86695	0.967672	2.83807	1.31642	1.26701		1.71014						4.35308	3.8834	1.9074	5.6796	2.6558	2.5968			4.35308	3.8834	1.9074	5.6796	2.6558	2.5968		0.702893		0.262772	0.24218	0.845467
F4ILR7	11.2525	9.20992	9.65837	12.3799	12.3264	12.1741	3	3	6			2.02168	0.558609	0.465795	3.0121	3.13937	2.91991		2.01958						4.38989	1.16195	0.918138	6.02787	6.33347	5.98453			4.38989	1.16195	0.918138	6.02787	6.33347	5.98453		0.0190803		3.95863	3.83495	0.0700754
F4IM84	11.1045	10.4067	9.25314	10.3056	10.7201	9.18609	3	3	6			1.87372	1.75543	0.0605612	0.937758	1.53307	-0.0681129		1.0154						4.06862	3.65143	0.119373	1.87666	3.09287	-0.139601			4.06862	3.65143	0.119373	1.87666	3.09287	-0.139601		0.723036		-1.00316	0.844103	0.557057
F4INA9	10.9412	9.82176	13.5348	12.4274	9.74214	11.7728	3	3	6			1.71038	1.17045	4.34221	3.05957	0.555136	2.51861		2.22606						3.71394	2.43463	8.55903	6.12287	1.11995	5.16204			3.71394	2.43463	8.55903	6.12287	1.11995	5.16204		0.806227		-0.76758	0.383766	0.766434
F4INY4	11.8244	10.7814	11.222	9.9398	10.3953	10.327	3	3	6			2.59355	2.13013	2.02943	0.571952	1.20831	1.07279		1.60103						5.63166	4.43084	4.00026	1.1446	2.4377	2.19874			5.63166	4.43084	4.00026	1.1446	2.4377	2.19874		0.796831		-2.76057	6.4032	0.0118153
F4IUJ7	10.0887	9.05488	9.67227	8.11348	8.72065	9.86112	3	3	6			0.857843	0.403568	0.479689	-1.25437	-0.46635	0.606916		0.10455						1.86273	0.839453	0.945525	-2.51026	-0.940832	1.24391			1.86273	0.839453	0.945525	-2.51026	-0.940832	1.24391		0.163551		-1.95163	2.63546	0.160934
F4IV99	12.5555	12.7774	12.7728	11.5552	12.3666	12.6518	3	3	6			3.32466	4.12609	3.58025	2.18732	3.17962	3.39757		3.29925						7.21921	8.58258	7.05711	4.3773	6.41467	6.96352			7.21921	8.58258	7.05711	4.3773	6.41467	6.96352		0.548712		-1.70114	2.84394	0.13928
F4J061	7.41388	10.5633	7.56811	7.43788	7.63749	8.85141	3	3	6			-1.81693	1.91198	-1.62447	-1.92997	-1.54951	-0.402797		-0.901949						-3.94531	3.97707	-3.20203	-3.86229	-3.12604	-0.825556			-3.94531	3.97707	-3.20203	-3.86229	-3.12604	-0.825556		0.231789		-1.54788	0.748143	0.595369
F4J9M5	10.31	10.7497	12.0355	12.2253	11.5433	11.2852	3	3	6			1.07923	2.09839	2.84291	2.85745	2.35627	2.03097		2.21087						2.34346	4.36482	5.60372	5.71838	4.75362	4.16259			2.34346	4.36482	5.60372	5.71838	4.75362	4.16259		0.370973		0.7742	0.991659	0.502899
F4JAA5	11.8995	11.3103	11.5558	12.606	10.4983	12.8397	3	3	6			2.66873	2.65896	2.36326	3.23812	1.31125	3.58553		2.63764						5.79492	5.53085	4.65827	6.48018	2.64535	7.34876			5.79492	5.53085	4.65827	6.48018	2.64535	7.34876		0.106943		0.163422	0.123932	0.917683
F4JFJ3	11.8137	8.23021	11.4445	12.2905	9.88275	10.0403	3	3	6			2.58285	-0.421094	2.25197	2.92263	0.695745	0.786087		1.4697						5.60843	-0.875909	4.43891	5.84883	1.40362	1.61113			5.60843	-0.875909	4.43891	5.84883	1.40362	1.61113		0.690186		-0.102616	0.0457342	0.968797
F4JHN2	9.22983	10.0437	9.96881	9.79765	5.39712	9.84732	3	3	6			-0.00098436	1.3924	0.776234	0.429797	-3.78989	0.593121		-0.0998858						-0.00213745	2.89631	1.53005	0.860119	-7.64585	1.21564			-0.00213745	2.89631	1.53005	0.860119	-7.64585	1.21564		0.154202		-3.33144	1.59439	0.331163
F4JMJ3	10.9625	9.39167	10.6446	11.3101	10.9565	12.7985	3	3	6			1.73172	0.740366	1.452	1.94225	1.76952	3.54427		1.86335						3.76028	1.54002	2.86207	3.88688	3.56989	7.26419			3.76028	1.54002	2.86207	3.88688	3.56989	7.26419		0.458606		2.1862	2.47553	0.1798
F4JMV6	10.1295	8.68622	10.5545	8.73132	11.1427	10.3631	3	3	6			0.898728	0.0349133	1.36192	-0.636529	1.95574	1.10895		0.787286						1.95151	0.0726222	2.6845	-1.27383	3.94558	2.27285			1.95151	0.0726222	2.6845	-1.27383	3.94558	2.27285		0.407014		0.0786559	0.0502039	0.9658
F4JN35	9.73342	10.2512	10.5825	7.62015	9.00921	10.06	3	3	6			0.50261	1.59994	1.38994	-1.7477	-0.177792	0.805818		0.395469						1.09137	3.32799	2.73974	-3.49753	-0.358684	1.65157			1.09137	3.32799	2.73974	-3.49753	-0.358684	1.65157		0.332793		-3.12125	2.94415	0.129934
F4JRJ6	12.8741	8.9222	10.0228	9.85776	9.44184	11.6975	3	3	6			3.64329	0.270891	0.830207	0.489915	0.254839	2.44333		1.32208						7.91107	0.563473	1.63644	0.980428	0.514122	5.00775			7.91107	0.563473	1.63644	0.980428	0.514122	5.00775		0.558636		-1.20289	0.558719	0.678905
F4K128	15.3129	14.4599	10.6344	14.4851	14.6584	14.5677	3	3	6			6.08207	5.80864	1.44178	5.11729	5.47143	5.31346		4.87244						13.2067	12.0824	2.84192	10.2408	11.0383	10.8902			13.2067	12.0824	2.84192	10.2408	11.0383	10.8902		0.0110636		1.3461	0.470105	0.721912
F4K2E9	10.5601	11.7411	9.6014	13.1415	10.3415	10.3354	3	3	6			1.32933	3.08982	0.408822	3.7736	1.15451	1.08119		1.80621						2.88652	6.42707	0.805838	7.55181	2.32916	2.21596			2.88652	6.42707	0.805838	7.55181	2.32916	2.21596		0.929984		0.659167	0.326086	0.797698
F4K493	11.2403	11.4739	10.9902	11.1247	10.9738	10.0083	3	3	6			2.0095	2.82255	1.7976	1.75686	1.78684	0.754086		1.82124						4.36346	5.87112	3.54328	3.51585	3.60483	1.54554			4.36346	5.87112	3.54328	3.51585	3.60483	1.54554		0.98582		-1.70388	2.73984	0.149702
F4KBP5	12.3893	11.5961	11.287	11.5399	11.7707	12.3891	3	3	6			3.1585	2.94479	2.09438	2.17204	2.5837	3.13492		2.68139						6.8584	6.12539	4.12829	4.34672	5.21245	6.4252			6.8584	6.12539	4.12829	4.34672	5.21245	6.4252		0.706316		-0.375897	0.454555	0.729735
F4KFV7	9.0979	10.8921	10.4665	10.1874	9.40769	12.9587	3	3	6			-0.132912	2.24078	1.27391	0.819504	0.220688	3.7045		1.35441						-0.288607	4.66099	2.51103	1.64001	0.445223	7.59258			-0.288607	4.66099	2.51103	1.64001	0.445223	7.59258		0.591795		0.931468	0.431507	0.741487
F4KGU4	10.8227	9.54032	9.52922	9.39603	9.15687	8.81558	3	3	6			1.59192	0.889015	0.336639	0.0281789	-0.0301382	-0.438627		0.396164						3.45671	1.84922	0.663555	0.0563921	-0.0608019	-0.898992			3.45671	1.84922	0.663555	0.0563921	-0.0608019	-0.898992		0.24277		-2.29096	4.13816	0.0567924
F7J0M4	11.4136	11.6332	11.8678	11.8415	10.7681	11.853	3	3	6			2.18276	2.98187	2.67524	2.47368	1.5811	2.59876		2.41557						4.73968	6.20252	5.27323	4.95037	3.18976	5.32631			4.73968	6.20252	5.27323	4.95037	3.18976	5.32631		0.592778		-0.916327	1.69915	0.307968
F7J0M6	10.7975	11.3481	11.7476	8.72999	11.2053	9.50283	3	3	6			1.56669	2.69676	2.55507	-0.637853	2.0183	0.248629		1.40793						3.40192	5.60946	5.03635	-1.27648	4.07179	0.509581			3.40192	5.60946	5.03635	-1.27648	4.07179	0.509581		0.300748		-3.58095	3.26961	0.103693
F7J0N2	10.8291	10.0786	14.3156	11.215	11.5052	11.3495	3	3	6			1.59828	1.42724	5.123	1.8472	2.31816	2.0953		2.40153						3.47052	2.96878	10.098	3.69665	4.67674	4.29444			3.47052	2.96878	10.098	3.69665	4.67674	4.29444		0.0303542		-1.28983	0.662068	0.631972
F9W301	9.99067	9.24714	9.51225	3.30163	8.68099	10.5771	3	3	6			0.759859	0.595837	0.319669	-6.06622	-0.506013	1.32294		-0.595653						1.64997	1.23939	0.630107	-12.1398	-1.02085	2.71145			1.64997	1.23939	0.630107	-12.1398	-1.02085	2.71145		0.00878454		-4.65623	1.29991	0.406152
G3XKQ9	7.29536	9.93808	9.36613	9.01542	8.13376	7.8703	3	3	6			-1.93546	1.28677	0.173548	-0.352433	-1.05325	-1.3839		-0.544119						-4.20267	2.67659	0.342085	-0.705295	-2.12486	-2.83638			-4.20267	2.67659	0.342085	-0.705295	-2.12486	-2.83638		0.175495		-1.49418	0.946716	0.518812
H2KWF1	9.42173	9.55059	10.6047	10.6627	11.0678	8.30342	3	3	6			0.190916	0.899286	1.41216	1.29482	1.88083	-0.950787		0.787872						0.414557	1.87058	2.78354	2.59122	3.79446	-1.94869			0.414557	1.87058	2.78354	2.59122	3.79446	-1.94869		0.269324		-0.210565	0.126251	0.916209
H6TFZ4	10.6072	10.3021	12.0423	11.8003	12.1349	11.3486	3	3	6			1.37643	1.65076	2.8497	2.43249	2.94793	2.09436		2.22528						2.98879	3.43371	5.6171	4.86794	5.94727	4.29252			2.98879	3.43371	5.6171	4.86794	5.94727	4.29252		0.525753		1.02271	1.5544	0.340469
I6PL68	10.3607	7.75415	9.08486	7.1467	9.93954	8.78257	3	3	6			1.12992	-0.897154	-0.107716	-2.22115	0.75253	-0.47163		-0.302533						2.45353	-1.86615	-0.212321	-4.44501	1.51818	-0.966634			2.45353	-1.86615	-0.212321	-4.44501	1.51818	-0.966634		0.692335		-1.42284	0.882912	0.542272
K4PW38	9.99166	10.5517	10.2428	8.47569	8.3474	10.545	3	3	6			0.760851	1.9004	1.05024	-0.892155	-0.839605	1.29076		0.545082						1.65212	3.95298	2.07015	-1.7854	-1.69385	2.64549			1.65212	3.95298	2.07015	-1.7854	-1.69385	2.64549		0.379647		-2.83633	2.68326	0.15569
O04138	6.81031	7.46932	5.59652	10.8409	4.76755	9.82348	3	3	6			-2.4205	-1.18199	-3.59606	1.47309	-4.41946	0.569276		-1.59594						-5.2559	-2.45863	-7.08827	2.94797	-8.91597	1.16677			-5.2559	-2.45863	-7.08827	2.94797	-8.91597	1.16677		0.234475		3.33386	1.17074	0.444195
O04226	9.97456	8.00815	10.4669	10.4477	12.3858	11.3857	3	3	6			0.743745	-0.643159	1.27431	1.07986	3.19875	2.1315		1.2975						1.61498	-1.33782	2.51183	2.16103	6.45327	4.36863			1.61498	-1.33782	2.51183	2.16103	6.45327	4.36863		0.936531		3.39798	3.10548	0.116187
O09781	11.1123	8.4424	9.42916	9.38554	9.2494	9.80103	3	3	6			1.8815	-0.208903	0.236578	0.017691	0.0623929	0.546827		0.422681						4.0855	-0.434533	0.466325	0.0354036	0.125874	1.12075			4.0855	-0.434533	0.466325	0.0354036	0.125874	1.12075		0.119176		-0.945088	0.880238	0.543278
O10236	8.75609	8.82693	10.2628	9.50001	8.75332	7.67786	3	3	6			-0.474723	0.175623	1.07022	0.132157	-0.433688	-1.57634		-0.184458						-1.03082	0.365308	2.10954	0.264476	-0.874938	-3.23081			-1.03082	0.365308	2.10954	0.264476	-0.874938	-3.23081		0.87582		-1.76176	1.89616	0.268657
O10378	12.4191	12.7256	13.1787	10.9842	8.64328	10.1361	3	3	6			3.18828	4.07427	3.9861	1.61636	-0.543726	0.881892		2.20053						6.92307	8.4748	7.85709	3.23468	-1.09693	1.80749			6.92307	8.4748	7.85709	3.23468	-1.09693	1.80749		0.222622		-6.43657	6.81234	0.00889776
O22243	12.4145	11.3984	10.4661	9.89983	10.3444	11.1306	3	3	6			3.18371	2.74706	1.2735	0.531977	1.1574	1.87643		1.79501						6.91315	5.7141	2.51022	1.0646	2.33498	3.84586			6.91315	5.7141	2.51022	1.0646	2.33498	3.84586		0.544565		-2.63068	2.61796	0.162898
O22386	10.2471	5.13344	10.489	7.52966	10.0243	11.5266	3	3	6			1.01628	-3.51787	1.29647	-1.83818	0.837304	2.27239		0.0110667						2.20677	-7.31743	2.5555	-3.67861	1.68921	4.65741			2.20677	-7.31743	2.5555	-3.67861	1.68921	4.65741		0.725157		1.74106	0.536363	0.689507
O22567	10.5839	9.68266	12.2534	10.9434	8.05842	8.385	3	3	6			1.35312	1.03135	3.06083	1.57555	-1.12858	-0.869203		0.837177						2.93817	2.14529	6.03326	3.15301	-2.27684	-1.78148			2.93817	2.14529	6.03326	3.15301	-2.27684	-1.78148		0.637877		-4.00735	2.95406	0.129044
O22755	11.4974	7.5108	8.0798	11.2091	11.4217	11.2929	3	3	6			2.26659	-1.1405	-1.11277	1.84124	2.23474	2.03869		1.02133						4.9217	-2.37233	-2.19341	3.68472	4.50845	4.17843			4.9217	-2.37233	-2.19341	3.68472	4.50845	4.17843		0.0196621		4.00522	2.07987	0.236536
O22798	9.35421	8.01134	11.1587	8.98371	10.2434	9.35491	3	3	6			0.123393	-0.639968	1.96616	-0.384142	1.05641	0.100708		0.370426						0.267936	-1.33118	3.87554	-0.768752	2.13123	0.206407			0.267936	-1.33118	3.87554	-0.768752	2.13123	0.206407		0.468748		-0.414467	0.276874	0.825378
O22907	10.3218	8.8582	10.1517	9.52452	10.5836	9.86742	3	3	6			1.091	0.206892	0.959074	0.156674	1.39664	0.613215		0.73725						2.36902	0.43035	1.89045	0.31354	2.81764	1.25682			2.36902	0.43035	1.89045	0.31354	2.81764	1.25682		0.778753		-0.100607	0.12117	0.919442
O23193	9.89445	9.06232	8.89603	8.37756	10.8906	2.94	3	3	6			0.663641	0.411009	-0.296548	-0.99029	1.70356	-6.3142		-0.803805						1.44104	0.85493	-0.584531	-1.98179	3.43683	-12.9413			1.44104	0.85493	-0.584531	-1.98179	3.43683	-12.9413		0.0307306		-4.39925	1.1266	0.457994
O23875	10.7946	11.004	9.66628	11.0042	11.0694	10.9201	3	3	6			1.56377	2.3527	0.4737	1.63637	1.88244	1.66593		1.59582						3.39558	4.8938	0.93372	3.27474	3.79771	3.41442			3.39558	4.8938	0.93372	3.27474	3.79771	3.41442		0.0360185		0.421256	0.412761	0.751184
O23877	7.35658	8.87338	11.1353	10.2649	10.0775	11.5209	3	3	6			-1.87423	0.222075	1.94268	0.897064	0.890478	2.26666		0.724122						-4.06972	0.461934	3.82926	1.79522	1.79648	4.64566			-4.06972	0.461934	3.82926	1.79522	1.79648	4.64566		0.293957		2.67196	1.54977	0.341563
O24174	10.4365	6.38716	10.2913	7.94895	8.95771	8.04609	3	3	6			1.20569	-2.26415	1.09871	-1.4189	-0.229294	-1.20812		-0.469343						2.61805	-4.70961	2.16569	-2.83952	-0.462585	-2.4761			2.61805	-4.70961	2.16569	-2.83952	-0.462585	-2.4761		0.17722		-1.95078	1.07081	0.476052
O24210	11.4169	10.1845	8.48172	11.3313	8.6894	11.1891	3	3	6			2.18609	1.5332	-0.710858	1.96341	-0.497601	1.93494		1.0682						4.7469	3.18916	-1.40119	3.9292	-1.00388	3.96578			4.7469	3.18916	-1.40119	3.9292	-1.00388	3.96578		0.888855		0.118742	0.052826	0.964046
O24230	10.8494	10.2306	9.68205	10.872	9.07007	7.74335	3	3	6			1.61859	1.57931	0.489469	1.50413	-0.116938	-1.51085		0.593954						3.51463	3.28509	0.964803	3.0101	-0.235914	-3.09658			3.51463	3.28509	0.964803	3.0101	-0.235914	-3.09658		0.35138		-2.69564	2.07333	0.237611
O40986	10.71	6.4552	11.3279	11.522	8.17936	9.61287	3	3	6			1.47922	-2.19611	2.13531	2.15419	-1.00764	0.358666		0.487273						3.21199	-4.56808	4.20896	4.31101	-2.03286	0.735108			3.21199	-4.56808	4.20896	4.31101	-2.03286	0.735108		0.609209		0.0534644	0.0174921	0.987949
O41252	8.25729	9.95774	9.28951	8.58368	8.22313	11.6451	3	3	6			-0.973519	1.30643	0.0969345	-0.784163	-0.963872	2.39092		0.178788						-2.11391	2.71748	0.19107	-1.56928	-1.94455	4.90032			-2.11391	2.71748	0.19107	-1.56928	-1.94455	4.90032		0.565645		0.197284	0.0836508	0.943667
O48534	11.8718	10.9847	11.5359	11.5188	11.2823	11.772	3	3	6			2.64094	2.3334	2.34333	2.1509	2.09533	2.51778		2.34695						5.73457	4.85364	4.61899	4.30443	4.22719	5.16035			5.73457	4.85364	4.61899	4.30443	4.22719	5.16035		0.873464		-0.505075	1.6134	0.326828
O48653	10.1928	11.1085	11.2558	10.9111	9.70242	11.7619	3	3	6			0.961973	2.45722	2.06322	1.54324	0.51541	2.50768		1.67479						2.08884	5.1112	4.06685	3.08837	1.03981	5.13964			2.08884	5.1112	4.06685	3.08837	1.03981	5.13964		0.718554		-0.666358	0.565821	0.675571
O49068	8.19908	7.45385	8.32351	9.62832	9.16012	8.90268	3	3	6			-1.03173	-1.19746	-0.869072	0.26047	-0.0268815	-0.351526		-0.536033						-2.24031	-2.49081	-1.71305	0.521258	-0.0542316	-0.720473			-2.24031	-2.49081	-1.71305	0.521258	-0.0542316	-0.720473		0.579698		2.06357	6.90269	0.00835764
O49289	11.495	10.7334	10.97	11.9449	10.7416	9.2576	3	3	6			2.26414	2.08205	1.77746	2.57705	1.55463	0.00339761		1.70979						4.91639	4.33082	3.50358	5.15724	3.13637	0.0069636			4.91639	4.33082	3.50358	5.15724	3.13637	0.0069636		0.139237		-1.48341	1.34506	0.393638
O49459	10.0441	10.0661	9.56421	10.6687	9.1554	8.70328	3	3	6			0.813308	1.41478	0.371629	1.30086	-0.0316049	-0.550922		0.553009						1.76603	2.94285	0.732527	2.60331	-0.0637608	-1.12915			1.76603	2.94285	0.732527	2.60331	-0.0637608	-1.12915		0.497227		-1.34367	1.50116	0.353268
O56042	10.2161	10.4625	9.11868	11.1053	11.7448	10.1219	3	3	6			0.985327	1.8112	-0.0738956	1.73741	2.55779	0.86772		1.31426						2.13955	3.76742	-0.145657	3.47693	5.16017	1.77844			2.13955	3.76742	-0.145657	3.47693	5.16017	1.77844		0.850512		1.55141	1.47963	0.358581
O56043	11.868	7.3328	12.2634	10.1362	10.0222	11.5555	3	3	6			2.6372	-1.31851	3.07087	0.768374	0.835224	2.30135		1.38242						5.72645	-2.7426	6.05305	1.53769	1.68501	4.71675			5.72645	-2.7426	6.05305	1.53769	1.68501	4.71675		0.229292		-0.365819	0.135116	0.910596
O56044	10.7982	10.5361	12.3123	10.4504	10.551	9.76104	3	3	6			1.56742	1.88475	3.11968	1.08254	1.36403	0.506834		1.58754						3.40351	3.92041	6.14927	2.1664	2.75184	1.03879			3.40351	3.92041	6.14927	2.1664	2.75184	1.03879		0.525176		-2.50539	3.98745	0.063046
O56834	9.45024	7.06813	10.8013	10.71	8.69537	8.97917	3	3	6			0.21943	-1.58317	1.60873	1.34218	-0.491637	-0.275034		0.136749						0.476472	-3.29312	3.171	2.686	-0.991847	-0.5637			0.476472	-3.29312	3.171	2.686	-0.991847	-0.5637		0.554591		0.258704	0.132481	0.912262
O64422	7.05094	7.19249	7.15846	8.84257	8.01447	11.0191	3	3	6			-2.17988	-1.45882	-2.03412	-0.525278	-1.17254	1.7649		-0.934288						-4.73341	-3.03445	-4.00949	-1.0512	-2.36552	3.61727			-4.73341	-3.03445	-4.00949	-1.0512	-2.36552	3.61727		0.136979		3.99264	3.30721	0.101026
O64762	7.87768	10.2494	6.77913	9.21519	9.29953	7.1102	3	3	6			-1.35313	1.59804	-2.41345	-0.152655	0.112524	-2.14401		-0.725445						-2.9382	3.32405	-4.7572	-0.305495	0.227009	-4.39427			-2.9382	3.32405	-4.7572	-0.305495	0.227009	-4.39427		0.52477		-0.0338019	0.0128908	0.991105
O64763	10.6688	8.98601	5.40779	8.56419	8.63336	7.09381	3	3	6			1.43798	0.334706	-3.78478	-0.80366	-0.553646	-2.16039		-0.921631						3.12246	0.696213	-7.46026	-1.6083	-1.11695	-4.42785			3.12246	0.696213	-7.46026	-1.6083	-1.11695	-4.42785		0.188182		-1.1705	0.424033	0.745338
O64852	12.1772	13.2075	13.486	12.2235	13.4979	13.2958	3	3	6			2.94642	4.55616	4.29338	2.85564	4.31085	4.04157		3.834						6.39789	9.47717	8.46277	5.71476	8.69686	8.28343			6.39789	9.47717	8.46277	5.71476	8.69686	8.28343		0.970851		-0.547592	0.524257	0.695317
O64937	13.6309	12.238	12.9303	13.9668	13.3734	12.8849	3	3	6			4.40014	3.58668	3.73777	4.59893	4.1864	3.63073		4.02344						9.55451	7.46057	7.3676	9.20346	8.4458	7.4414			9.55451	7.46057	7.3676	9.20346	8.4458	7.4414		0.676267		0.235996	0.319584	0.801301
O65037	9.69012	8.76122	7.60585	9.87355	3.58424	2.46978	3	3	6			0.459308	0.109912	-1.58673	0.505704	-5.60276	-6.78442		-2.14983						0.997346	0.228625	-3.12763	1.01202	-11.3032	-13.9051			0.997346	0.228625	-3.12763	1.01202	-11.3032	-13.9051		0.140893		-7.43154	2.36322	0.194357
O65351	7.93634	10.9293	12.2976	9.89241	9.28903	9.87955	3	3	6			-1.29447	2.27803	3.105	0.524558	0.102023	0.62535		0.890081						-2.81083	4.73847	6.12033	1.04976	0.205824	1.28169			-2.81083	4.73847	6.12033	1.04976	0.205824	1.28169		0.0273633		-1.8369	0.793512	0.576938
O65508	9.002	8.47192	8.98182	9.01137	7.58173	8.56525	3	3	6			-0.228813	-0.179388	-0.210753	-0.356481	-1.60528	-0.688948		-0.544943						-0.496848	-0.373141	-0.41542	-0.713396	-3.23854	-1.41204			-0.496848	-0.373141	-0.41542	-0.713396	-3.23854	-1.41204		0.00464022		-1.35952	2.23489	0.212438
O65857	8.27873	5.8337	7.72758	6.23266	6.1519	12.3054	3	3	6			-0.952084	-2.81761	-1.465	-3.13519	-3.03511	3.05118		-1.3923						-2.06737	-5.86084	-2.88769	-6.2742	-6.12313	6.25357			-2.06737	-5.86084	-2.88769	-6.2742	-6.12313	6.25357		0.143109		1.55738	0.442215	0.736004
O70790	9.9747	9.17015	12.2603	8.15613	12.6401	7.1644	3	3	6			0.743889	0.518843	3.0677	-1.21171	3.45306	-2.0898		0.746996						1.61529	1.07923	6.0468	-2.42491	6.96632	-4.28317			1.61529	1.07923	6.0468	-2.42491	6.96632	-4.28317		0.339437		-2.82769	0.998965	0.500359
O70791	5.568	7.43003	8.00697	8.83001	6.52337	5.42559	3	3	6			-3.66281	-1.22127	-1.18561	-0.53784	-2.66363	-3.82861		-2.18329						-7.95347	-2.54034	-2.33697	-1.07634	-5.3737	-7.84696			-7.95347	-2.54034	-2.33697	-1.07634	-5.3737	-7.84696		0.92737		-0.48874	0.208885	0.865206
O80792	9.65923	9.06053	8.66949	8.95922	10.0596	8.63118	3	3	6			0.428416	0.409227	-0.52309	-0.408628	0.87261	-0.623025		0.0259182						0.930268	0.851223	-1.03107	-0.817755	1.76043	-1.27693			0.930268	0.851223	-1.03107	-0.817755	1.76043	-1.27693		0.630006		-0.361555	0.38194	0.767405
O80839	6.44387	9.6821	8.32903	10.3914	10.1509	10.5176	3	3	6			-2.78694	1.03079	-0.863543	1.0235	0.963885	1.26337		0.105177						-6.0516	2.14413	-1.70215	2.04825	1.94458	2.58935			-6.0516	2.14413	-1.70215	2.04825	1.94458	2.58935		0.0141587		4.06393	2.13581	0.227539
O81263	3.09599	6.54586	6.36468	6.8658	4.59246	7.46459	3	3	6			-6.13482	-2.10545	-2.8279	-2.50205	-4.59455	-1.78962		-3.32573						-13.3212	-4.37949	-5.57413	-5.00716	-9.2692	-3.66792			-13.3212	-4.37949	-5.57413	-5.00716	-9.2692	-3.66792		0.532687		1.77685	0.699084	0.615963
O81913	7.472	4.98586	10.0955	10.8149	9.08908	10.613	3	3	6			-1.75881	-3.66544	0.902952	1.44705	-0.0979253	1.35876		-0.302236						-3.81911	-7.6244	1.77983	2.89587	-0.197558	2.78486			-3.81911	-7.6244	1.77983	2.89587	-0.197558	2.78486		0.241927		5.04895	2.66123	0.158085
O81914	9.46728	8.25068	8.17463	9.62715	8.43654	7.80051	3	3	6			0.236467	-0.40063	-1.01795	0.259303	-0.75046	-1.45369		-0.52116						0.513467	-0.83334	-2.0065	0.518922	-1.514	-2.97943			0.513467	-0.83334	-2.0065	0.518922	-1.514	-2.97943		0.680025		-0.549377	0.55077	0.682656
O82143	8.58695	8.37534	8.79019	8.61268	8.55194	7.15056	3	3	6			-0.64386	-0.275964	-0.402392	-0.755164	-0.635066	-2.10364		-0.802681						-1.39809	-0.574025	-0.793163	-1.51125	-1.2812	-4.31154			-1.39809	-0.574025	-0.793163	-1.51125	-1.2812	-4.31154		0.120308		-1.44624	2.16207	0.223436
O82451	10.8861	11.8536	9.90501	11.9136	10.7298	10.8902	3	3	6			1.65527	3.20231	0.712434	2.54579	1.54279	1.63599		1.88243						3.59426	6.66106	1.40429	5.09468	3.11247	3.35305			3.59426	6.66106	1.40429	5.09468	3.11247	3.35305		0.287394		-0.0331358	0.0219267	0.984916
O92604	10.1397	9.83325	10.0545	11.2215	10.6833	10.4814	3	3	6			0.908867	1.18195	0.861891	1.85362	1.49634	1.22719		1.25498						1.97352	2.45854	1.69889	3.7095	3.01877	2.51521			1.97352	2.45854	1.69889	3.7095	3.01877	2.51521		0.583122		1.03751	3.93955	0.0651744
O92605	9.32818	7.38465	10.8479	10.5115	11.69	7.2695	3	3	6			0.0973686	-1.26665	1.65534	1.14361	2.50304	-1.9847		0.358						0.211427	-2.63473	3.26288	2.28861	5.04972	-4.06776			0.211427	-2.63473	3.26288	2.28861	5.04972	-4.06776		0.569337		0.81033	0.300285	0.812092
P07728	12.1216	13.0853	14.2148	11.303	15.0972	12.1143	3	3	6			2.89079	4.43398	5.0222	1.93513	5.91016	2.86009		3.84206						6.27709	9.22302	9.89936	3.87263	11.9234	5.86193			6.27709	9.22302	9.89936	3.87263	11.9234	5.86193		0.348389		-1.24718	0.590588	0.664072
P07730	12.7855	12.4289	14.0536	6.22834	14.612	8.41308	3	3	6			3.55472	3.7776	4.86101	-3.13951	5.425	-0.841125		2.27295						7.71876	7.8577	9.58164	-6.28285	10.9446	-1.72394			7.71876	7.8577	9.58164	-6.28285	10.9446	-1.72394		0.0266719		-7.40677	1.8034	0.286499
P09516	10.9253	8.49081	10.0153	9.03103	7.90881	9.57788	3	3	6			1.69452	-0.160496	0.822698	-0.336822	-1.27819	0.32368		0.177564						3.6795	-0.333845	1.62164	-0.674055	-2.57867	0.663401			3.6795	-0.333845	1.62164	-0.674055	-2.57867	0.663401		0.794521		-2.51887	2.5844	0.166732
P0C032	5.66852	6.70681	13.7552	6.78202	8.50048	7.51357	3	3	6			-3.5623	-1.9445	4.56262	-2.58583	-0.686522	-1.74063		-0.99286						-7.73521	-4.04471	8.99348	-5.17482	-1.38501	-3.56753			-7.73521	-4.04471	8.99348	-5.17482	-1.38501	-3.56753		0.0894913		-2.44697	0.595167	0.661968
P0C041	9.46097	7.52763	8.93584	8.75104	11.1725	9.14463	3	3	6			0.230155	-1.12367	-0.256734	-0.616806	1.98549	-0.10957		0.0181427						0.499762	-2.33733	-0.506055	-1.23436	4.00559	-0.22457			0.499762	-2.33733	-0.506055	-1.23436	4.00559	-0.22457		0.42236		1.63009	1.25824	0.418053
P0C0L0	6.73173	8.04007	7.65091	11.0367	8.29131	8.13432	3	3	6			-2.49909	-0.611237	-1.54167	1.66881	-0.895696	-1.11988		-0.833127						-5.42655	-1.27142	-3.03882	3.33965	-1.80701	-2.29526			-5.42655	-1.27142	-3.03882	3.33965	-1.80701	-2.29526		0.617014		2.99139	2.06083	0.239679
P0C0M2	8.81452	9.71101	9.52093	6.71067	8.25323	10.1195	3	3	6			-0.416294	1.05971	0.328356	-2.65718	-0.933772	0.865258		-0.292321						-0.903946	2.20427	0.647229	-5.3176	-1.88383	1.7734			-0.903946	2.20427	0.647229	-5.3176	-1.88383	1.7734		0.322249		-2.45853	1.5858	0.33314
P0C0M3	9.96278	8.61846	10.0955	9.43784	9.52107	9.90916	3	3	6			0.731968	-0.0328482	0.902952	0.0699874	0.334065	0.654956		0.443513						1.5894	-0.0683267	1.77983	0.14006	0.673955	1.34237			1.5894	-0.0683267	1.77983	0.14006	0.673955	1.34237		0.519822		-0.381506	0.722991	0.60584
P0C0X5	5.99991	8.90671	8.42798	6.92647	5.17501	7.37591	3	3	6			-3.2309	0.255403	-0.764594	-2.44137	-4.012	-1.87829		-2.01196						-7.01562	0.531258	-1.50711	-4.88572	-8.09395	-3.84968			-7.01562	0.531258	-1.50711	-4.88572	-8.09395	-3.84968		0.486287		-2.94596	1.64828	0.319021
P0C127	7.78784	8.39365	9.51529	7.73417	9.61167	8.34119	3	3	6			-1.44298	-0.257659	0.322709	-1.63368	0.424665	-0.913017		-0.583326						-3.13329	-0.535951	0.636098	-3.26935	0.856735	-1.87128			-3.13329	-0.535951	0.636098	-3.26935	0.856735	-1.87128		0.916039		-0.416918	0.29957	0.812494
P0C128	9.06604	7.18795	8.54249	9.47498	10.1971	7.57516	3	3	6			-0.164777	-1.46336	-0.650087	0.107136	1.01009	-1.67904		-0.47334						-0.357799	-3.0439	-1.2814	0.214402	2.03779	-3.4413			-0.357799	-3.0439	-1.2814	0.214402	2.03779	-3.4413		0.386104		1.16467	0.858712	0.551445
P0C131	9.06275	9.42677	10.7382	5.70924	3.57664	7.70217	3	3	6			-0.168065	0.775461	1.5456	-3.65861	-5.61036	-1.55203		-1.44467						-0.364938	1.61302	3.04656	-7.32169	-11.3185	-3.18098			-0.364938	1.61302	3.04656	-7.32169	-11.3185	-3.18098		0.301091		-8.70528	5.21644	0.0268965
P0C2Y4	9.10913	8.73173	8.14644	9.77896	9.3594	6.80219	3	3	6			-0.121687	0.0804192	-1.04614	0.411116	0.172393	-2.45201		-0.492651						-0.264233	0.167278	-2.06206	0.822734	0.347792	-5.02554			-0.264233	0.167278	-2.06206	0.822734	0.347792	-5.02554		0.23402		-0.565333	0.338215	0.791019
P0C509	10.6872	10.881	12.5834	11.9726	11.2096	11.6083	3	3	6			1.45639	2.22965	3.39086	2.60477	2.02257	2.35405		2.34305						3.16242	4.63785	6.68379	5.21272	4.08041	4.82477			3.16242	4.63785	6.68379	5.21272	4.08041	4.82477		0.191496		-0.122054	0.128205	0.914969
P0C522	13.1706	11.2204	11.46	14.3204	12.8924	12.6966	3	3	6			3.93977	2.56907	2.26747	4.9526	3.70535	3.44237		3.47944						8.55486	5.34386	4.46946	9.91124	7.4753	7.05535			8.55486	5.34386	4.46946	9.91124	7.4753	7.05535		0.678829		2.02457	1.96676	0.255826
P0C585	9.85577	7.35465	9.46089	10.0101	10.9458	8.47569	3	3	6			0.624959	-1.29666	0.268309	0.642261	1.7588	-0.778509		0.203194						1.35704	-2.69715	0.528869	1.2853	3.54828	-1.5956			1.35704	-2.69715	0.528869	1.2853	3.54828	-1.5956		0.816784		1.34974	0.932572	0.523924
P0C586	9.60587	10.3982	9.27305	11.6407	10.4642	10.7817	3	3	6			0.375056	1.7469	0.0804724	2.27285	1.27723	1.52749		1.21333						0.814401	3.63369	0.158621	4.54847	2.57674	3.13067			0.814401	3.63369	0.158621	4.54847	2.57674	3.13067		0.465483		1.88306	2.34594	0.196699
P0C5B1	7.2636	9.99223	9.13263	9.4574	8.45418	10.4143	3	3	6			-1.96721	1.34092	-0.059949	0.0895535	-0.732829	1.16006		-0.0282427						-4.27163	2.78922	-0.118167	0.179216	-1.47844	2.37761			-4.27163	2.78922	-0.118167	0.179216	-1.47844	2.37761		0.458115		0.89299	0.471099	0.721415
P0C5B3	10.0494	8.31093	8.22569	7.89639	7.77479	7.16219	3	3	6			0.818628	-0.340376	-0.966888	-1.47145	-1.41222	-2.09201		-0.91072						1.77758	-0.708009	-1.90585	-2.9447	-2.84906	-4.2877			1.77758	-0.708009	-1.90585	-2.9447	-2.84906	-4.2877		0.309818		-3.08173	4.07539	0.0593179
P0C5C6	10.6006	7.65392	9.56957	12.8387	10.1293	11.1196	3	3	6			1.36975	-0.997387	0.376994	3.47084	0.942278	1.86539		1.17131						2.97429	-2.07464	0.7431	6.94592	1.90099	3.82322			2.97429	-2.07464	0.7431	6.94592	1.90099	3.82322		0.993688		3.67579	2.72939	0.15079
P0C5C9	11.5665	9.80382	10.4941	11.7482	8.13247	10.8653	3	3	6			2.33567	1.15252	1.30148	2.3803	-1.05453	1.61114		1.28776						5.0717	2.39732	2.56537	4.76351	-2.12745	3.30214			5.0717	2.39732	2.56537	4.76351	-2.12745	3.30214		0.290875		-1.3654	0.786955	0.579566
P0C5D1	13.0337	11.6193	10.2245	14.0351	11.008	12.5908	3	3	6			3.80289	2.968	1.03191	4.66721	1.821	3.33662		2.93794						8.25763	6.17366	2.03401	9.34011	3.67376	6.8386			8.25763	6.17366	2.03401	9.34011	3.67376	6.8386		0.891047		1.12905	0.578573	0.669626
P0C5D5	10.3568	6.90761	9.74339	9.73748	8.53228	10.1829	3	3	6			1.12597	-1.7437	0.55081	0.369636	-0.654727	0.928689		0.0961136						2.44494	-3.62702	1.08571	0.739723	-1.32087	1.9034			2.44494	-3.62702	1.08571	0.739723	-1.32087	1.9034		0.415904		0.472873	0.268322	0.830285
P0C5D6	11.3226	7.55964	8.14308	10.1383	9.85437	8.95881	3	3	6			2.09179	-1.09166	-1.0495	0.770424	0.667365	-0.295389		0.182172						4.54214	-2.27074	-2.06869	1.54179	1.34637	-0.605417			4.54214	-2.27074	-2.06869	1.54179	1.34637	-0.605417		0.171534		0.693342	0.355113	0.781808
P0CE10	11.9252	11.0135	12.5272	12.1032	11.408	11.2896	3	3	6			2.69437	2.36222	3.33458	2.73534	2.22095	2.03541		2.56381						5.85059	4.91361	6.57286	5.47402	4.48063	4.1717			5.85059	4.91361	6.57286	5.47402	4.48063	4.1717		0.801694		-1.07024	2.64686	0.159667
P0CH01	9.30961	6.53091	8.06932	6.01603	7.01313	11.5586	3	3	6			0.0788002	-2.12039	-1.12326	-3.35182	-2.17388	2.30436		-1.06437						0.171108	-4.41058	-2.21408	-6.70773	-4.38566	4.72293			0.171108	-4.41058	-2.21408	-6.70773	-4.38566	4.72293		0.251518		0.0277001	0.00805629	0.994431
P0CH02	8.85269	7.54689	8.67246	9.18443	8.7106	10.0178	3	3	6			-0.378127	-1.10441	-0.520117	-0.183419	-0.476405	0.76358		-0.316483						-0.82107	-2.29726	-1.02521	-0.367061	-0.961117	1.565			-0.82107	-2.29726	-1.02521	-0.367061	-0.961117	1.565		0.536688		1.46012	2.4998	0.176801
P0CH03	8.47606	8.19224	7.6314	8.85072	10.6432	9.60075	3	3	6			-0.754755	-0.459064	-1.56118	-0.51713	1.45622	0.346547		-0.248227						-1.63888	-0.954887	-3.07728	-1.03489	2.93783	0.710268			-1.63888	-0.954887	-3.07728	-1.03489	2.93783	0.710268		0.456765		2.76142	3.28635	0.102497
P0DH89	9.64922	9.43773	8.97857	11.419	9.47519	3.45141	3	3	6			0.418408	0.786424	-0.21401	2.05111	0.288181	-5.80279		-0.412113						0.908535	1.63582	-0.421839	4.10472	0.581387	-11.8932			0.908535	1.63582	-0.421839	4.10472	0.581387	-11.8932		0.0303503		-3.10986	0.765644	0.588191
P0DKK0	11.6129	9.31104	11.5553	10.6652	9.74724	9.99181	3	3	6			2.3821	0.659737	2.36268	1.2974	0.560231	0.737603		1.33329						5.17252	1.3723	4.65713	2.59638	1.13023	1.51176			5.17252	1.3723	4.65713	2.59638	1.13023	1.51176		0.239674		-1.98786	2.37938	0.192192
P0DKK2	5.78372	8.48482	9.48148	10.4808	9.25153	9.82542	3	3	6			-3.44709	-0.166484	0.288899	1.11294	0.0645247	0.571218		-0.262666						-7.48506	-0.3463	0.569456	2.22724	0.130175	1.17074			-7.48506	-0.3463	0.569456	2.22724	0.130175	1.17074		0.107026		3.59669	2.0511	0.241299
P0DO03	10.0897	8.36216	9.52929	10.01	9.36238	11.5516	3	3	6			0.858903	-0.289144	0.336717	0.642121	0.175377	2.29741		0.67023						1.86503	-0.601442	0.663709	1.28502	0.353812	4.70868			1.86503	-0.601442	0.663709	1.28502	0.353812	4.70868		0.448727		1.47341	1.38633	0.382536
P0DO09	11.2234	9.92844	14.6651	11.6351	9.3866	12.3714	3	3	6			1.99259	1.27714	5.47248	2.26728	0.19959	3.11722		2.38772						4.32672	2.65654	10.7869	4.53733	0.402661	6.38893			4.32672	2.65654	10.7869	4.53733	0.402661	6.38893		0.675018		-2.14709	0.944151	0.519735
P0DO10	12.308	11.148	10.282	10.2569	10.1657	9.41804	3	3	6			3.07721	2.49666	1.08947	0.889068	0.978656	0.16384		1.44915						6.6819	5.19324	2.14747	1.77922	1.97438	0.3358			6.6819	5.19324	2.14747	1.77922	1.97438	0.3358		0.260794		-3.31107	3.61369	0.0816906
P0DO27	5.08797	8.26931	4.28961	7.52427	6.44492	8.35619	3	3	6			-4.14284	-0.381993	-4.90296	-1.84358	-2.74209	-0.898015		-2.48525						-8.99581	-0.794575	-9.66434	-3.68941	-5.53199	-1.84053			-8.99581	-0.794575	-9.66434	-3.68941	-5.53199	-1.84053		0.245058		2.7976	1.28589	0.410117
P14654	14.2069	12.7778	8.76795	10.548	9.01427	12.8532	3	3	6			4.97605	4.1265	-0.424625	1.18011	-0.172733	3.59901		2.21405						10.8051	8.58344	-0.836986	2.36165	-0.348479	7.37639			10.8051	8.58344	-0.836986	2.36165	-0.348479	7.37639		0.573558		-3.05398	0.971913	0.509829
P14717	11.4807	11.857	9.16425	12.4868	12.714	10.5873	3	3	6			2.24993	3.20574	-0.0283239	3.11891	3.52696	1.33311		2.23439						4.88552	6.66818	-0.0558299	6.24163	7.11542	2.73228			4.88552	6.66818	-0.0558299	6.24163	7.11542	2.73228		0.614491		1.53048	0.834213	0.560889
P16081	9.29501	8.99342	10.4895	10.7571	12.0592	10.4015	3	3	6			0.0641987	0.342113	1.29697	1.38929	2.8722	1.14732		1.18535						0.139402	0.71162	2.55648	2.78028	5.79449	2.3515			0.139402	0.71162	2.55648	2.78028	5.79449	2.3515		0.62373		2.50625	2.97265	0.127392
P17070	12.3712	6.28411	10.4543	7.54496	7.42265	5.79592	3	3	6			3.14042	-2.3672	1.26172	-1.82288	-1.76435	-3.45828		-0.835096						6.81914	-4.92396	2.48701	-3.64799	-3.55947	-7.08795			6.81914	-4.92396	2.48701	-3.64799	-3.55947	-7.08795		0.205963		-6.22587	2.63864	0.160579
P17379	7.49354	10.5085	11.521	11.4627	10.9912	11.2418	3	3	6			-1.73728	1.85718	2.32843	2.09486	1.80423	1.9876		1.38917						-3.77234	3.86308	4.58963	4.19227	3.63992	4.07371			-3.77234	3.86308	4.58963	4.19227	3.63992	4.07371		0.00784966		2.40852	1.11098	0.462981
P17814	9.23817	7.66803	7.94837	8.84402	9.192	9.37093	3	3	6			0.00735328	-0.983273	-1.24421	-0.523833	0.00499184	0.116725		-0.437041						0.015967	-2.04528	-2.45249	-1.0483	0.0100707	0.239234			0.015967	-2.04528	-2.45249	-1.0483	0.0100707	0.239234		0.424407		1.2276	2.13928	0.226992
P19898	10.5319	10.884	12.0642	10.8464	9.1704	9.46084	3	3	6			1.30106	2.23271	2.87159	1.4785	-0.0166042	0.206643		1.34565						2.82513	4.64421	5.66026	2.95881	-0.0334979	0.423526			2.82513	4.64421	5.66026	2.95881	-0.0334979	0.423526		0.885194		-3.26025	4.08113	0.0590823
P22474	9.74416	8.91719	7.96884	11.0242	9.20161	11.3688	3	3	6			0.513349	0.265886	-1.22374	1.65639	0.0146044	2.11463		0.556854						1.11469	0.553063	-2.41213	3.3148	0.0294633	4.33406			1.11469	0.553063	-2.41213	3.3148	0.0294633	4.33406		0.83017		2.80757	2.52603	0.173616
P23628	8.65789	6.20122	8.76032	7.3535	9.01558	9.36696	3	3	6			-0.572923	-2.45008	-0.432256	-2.01435	-0.171423	0.112754		-0.92138						-1.24405	-5.09636	-0.85203	-4.03115	-0.345834	0.231095			-1.24405	-5.09636	-0.85203	-4.03115	-0.345834	0.231095		0.985755		1.01552	0.685901	0.621617
P25766	9.64115	7.86895	7.92955	10.0074	10.2471	7.80484	3	3	6			0.410336	-0.782361	-1.26302	0.6396	1.06009	-1.44936		-0.230786						0.891008	-1.62737	-2.48957	1.27998	2.13867	-2.97055			0.891008	-1.62737	-2.48957	1.27998	2.13867	-2.97055		0.583829		1.22468	0.86324	0.549717
P25776	9.2585	7.70377	7.99022	9.87249	10.4486	10.5825	3	3	6			0.0276828	-0.947542	-1.20236	0.504642	1.26163	1.32832		0.162061						0.0601107	-1.97096	-2.37	1.0099	2.54525	2.72246			0.0601107	-1.97096	-2.37	1.0099	2.54525	2.72246		0.686148		3.51949	5.69921	0.0192472
P25777	11.532	8.62425	8.93449	6.36709	10.95	8.45035	3	3	6			2.3012	-0.02706	-0.25809	-3.00076	1.76304	-0.803857		-0.00425348						4.99686	-0.0562868	-0.508727	-6.00517	3.55682	-1.64755			4.99686	-0.0562868	-0.508727	-6.00517	3.55682	-1.64755		0.579164		-2.84258	1.20115	0.434927
P27500	11.6251	7.65098	11.5607	11.42	11.7476	9.62161	3	3	6			2.39426	-1.00033	2.36814	2.05216	2.56056	0.36741		1.45703						5.19892	-2.08076	4.66789	4.10683	5.16576	0.753029			5.19892	-2.08076	4.66789	4.10683	5.16576	0.753029		0.48739		0.746525	0.330162	0.795447
P27501	7.87049	10.249	7.58391	8.41806	8.41714	8.23472	3	3	6			-1.36032	1.59769	-1.60867	-0.949784	-0.76987	-1.01948		-0.685073						-2.95382	3.32331	-3.17088	-1.90073	-1.55316	-2.08949			-2.95382	3.32331	-3.17088	-1.90073	-1.55316	-2.08949		0.0108221		-0.913995	0.494299	0.709907
P27502	11.6322	10.846	12.0266	11.1848	12.0648	12.0532	3	3	6			2.40136	2.19465	2.83398	1.81697	2.87777	2.79898		2.48729						5.21435	4.56505	5.58612	3.63615	5.80572	5.73667			5.21435	4.56505	5.58612	3.63615	5.80572	5.73667		0.298777		-0.062327	0.0899926	0.939528
P27578	11.4408	4.54683	4.32668	6.59166	8.12324	7.22197	3	3	6			2.20995	-4.10447	-4.8659	-2.77618	-1.06376	-2.03223		-2.10543						4.79872	-8.53762	-9.59127	-5.55575	-2.14607	-4.16517			4.79872	-8.53762	-9.59127	-5.55575	-2.14607	-4.16517		0.0873788		0.487724	0.11571	0.922928
P27933	9.6316	9.31852	8.19746	10.6247	9.95925	6.09584	3	3	6			0.400783	0.667213	-0.995115	1.25686	0.772244	-3.15836		-0.176064						0.870265	1.38785	-1.96149	2.51524	1.55795	-6.47325			0.870265	1.38785	-1.96149	2.51524	1.55795	-6.47325		0.235403		-0.898894	0.355164	0.781781
P27937	10.1397	7.58286	10.3478	8.17148	10.2881	8.34505	3	3	6			0.908867	-1.06845	1.15527	-1.19637	1.10105	-0.909152		-0.00146451						1.97352	-2.22246	2.27717	-2.3942	2.2213	-1.86336			1.97352	-2.22246	2.27717	-2.3942	2.2213	-1.86336		0.995748		-1.35483	0.872401	0.546237
P28752	6.87024	9.75641	5.81029	8.17951	9.88798	8.90746	3	3	6			-2.36057	1.1051	-3.38229	-1.18834	0.700977	-0.346741		-0.911977						-5.12577	2.29869	-6.6669	-2.37812	1.41418	-0.710666			-5.12577	2.29869	-6.6669	-2.37812	1.41418	-0.710666		0.271715		2.60646	1.21507	0.430753
P29044	7.41447	7.06749	9.94999	9.66085	9.74824	9.23597	3	3	6			-1.81634	-1.58382	0.75741	0.293004	0.561238	-0.018236		-0.301124						-3.94402	-3.29446	1.49295	0.586365	1.13226	-0.0373759			-3.94402	-3.29446	1.49295	0.586365	1.13226	-0.0373759		0.0747898		2.4756	2.12343	0.2295
P29045	10.6772	9.83464	10.8028	11.1951	12.5498	10.938	3	3	6			1.44638	1.18334	1.61018	1.82722	3.3628	1.68376		1.85228						3.14068	2.46143	3.17386	3.65666	6.78424	3.45097			3.14068	2.46143	3.17386	3.65666	6.78424	3.45097		0.0885686		1.7053	2.34345	0.197038
P29078	8.64595	5.92664	6.48533	8.55746	9.17635	10.5343	3	3	6			-0.584866	-2.72467	-2.70725	-0.810384	-0.0106573	1.2801		-0.926287						-1.26998	-5.66751	-5.33631	-1.62176	-0.0215004	2.62364			-1.26998	-5.66751	-5.33631	-1.62176	-0.0215004	2.62364		0.867819		4.41807	3.67254	0.0784249
P29250	10.4933	10.187	11.1406	8.40977	10.7432	9.83908	3	3	6			1.26244	1.53567	1.94806	-0.958075	1.55615	0.584875		0.988187						2.74128	3.19432	3.83986	-1.91732	3.13943	1.19874			2.74128	3.19432	3.83986	-1.91732	3.13943	1.19874		0.0894838		-2.45154	2.48116	0.179101
P29545	6.10383	7.50898	7.8596	6.05339	7.90153	9.89435	3	3	6			-3.12698	-1.14232	-1.33298	-3.31445	-1.28547	0.640146		-1.59368						-6.78996	-2.37612	-2.62747	-6.63295	-2.59336	1.31202			-6.78996	-2.37612	-2.62747	-6.63295	-2.59336	1.31202		0.56051		1.29308	0.605136	0.657409
P29619	6.92434	6.40688	11.0383	11.2566	9.50265	9.59008	3	3	6			-2.30648	-2.24443	1.84572	1.88877	0.315648	0.335879		-0.02748						-5.00831	-4.66859	3.63815	3.77985	0.636799	0.688405			-5.00831	-4.66859	3.63815	3.77985	0.636799	0.688405		0.238046		3.7146	1.81088	0.285018
P29620	11.7592	10.0217	9.97599	9.67476	9.72904	9.51637	3	3	6			2.52841	1.37037	0.783414	0.306909	0.542038	0.262167		0.965551						5.49022	2.85047	1.5442	0.614193	1.09353	0.537328			5.49022	2.85047	1.5442	0.614193	1.09353	0.537328		0.0439702		-2.54661	2.67372	0.156722
P30287	9.63419	10.2793	6.5277	9.44655	9.68133	10.3287	3	3	6			0.403381	1.62796	-2.66488	0.0786979	0.494321	1.07447		0.168991						0.875907	3.38627	-5.2528	0.157492	0.997261	2.2022			0.875907	3.38627	-5.2528	0.157492	0.997261	2.2022		0.101541		1.44919	0.709805	0.611403
P30298	10.4684	10.4246	11.0761	12.3374	12.1236	11.6971	3	3	6			1.23761	1.77328	1.88357	2.96955	2.93657	2.44294		2.20725						2.68736	3.68856	3.71275	5.94272	5.92433	5.00695			2.68736	3.68856	3.71275	5.94272	5.92433	5.00695		0.91071		2.26178	7.00007	0.00781209
P31673	3.34979	3.5373	9.4588	8.86419	8.8333	9.72601	3	3	6			-5.88102	-5.11401	0.266219	-0.503662	-0.353704	0.471811		-1.85239						-12.7701	-10.6375	0.52475	-1.00794	-0.713575	0.967006			-12.7701	-10.6375	0.52475	-1.00794	-0.713575	0.967006		0.0435638		7.37613	2.22824	0.213419
P31674	2.4947	9.10669	9.089	9.87047	8.0343	8.90298	3	3	6			-6.73612	0.455387	-0.103577	0.502625	-1.1527	-0.351224		-1.23093						-14.6269	0.947239	-0.204163	1.00586	-2.3255	-0.719855			-14.6269	0.947239	-0.204163	1.00586	-2.3255	-0.719855		0.0710885		3.9481	1.05223	0.482221
P31691	12.6723	12.4402	12.5277	12.7323	12.5568	13.0737	3	3	6			3.44152	3.78894	3.3351	3.36445	3.36984	3.8195		3.51989						7.47297	7.88128	6.57388	6.733	6.79843	7.8283			7.47297	7.88128	6.57388	6.733	6.79843	7.8283		0.915181		-0.189466	0.441974	0.736127
P31924	14.3722	13.3276	12.9879	14.9306	14.2742	14.4173	3	3	6			5.14137	4.67625	3.79531	5.5627	5.08715	5.16312		4.90432						11.164	9.72695	7.48101	11.1322	10.263	10.5821			11.164	9.72695	7.48101	11.1322	10.263	10.5821		0.106246		1.20178	1.57124	0.336519
P35681	11.3568	11.259	11.1536	12.1628	11.4443	11.3194	3	3	6			2.12597	2.60773	1.96097	2.79492	2.25729	2.06524		2.30202						4.61636	5.42428	3.86532	5.59325	4.55393	4.23284			4.61636	5.42428	3.86532	5.59325	4.55393	4.23284		0.908228		0.158023	0.30731	0.808147
P35682	9.5563	8.70342	9.62759	9.45385	6.49336	7.44012	3	3	6			0.325483	0.052112	0.435011	0.0859989	-2.69365	-1.81408		-0.60152						0.706757	0.108397	0.85746	0.172103	-5.43426	-3.71807			0.706757	0.108397	0.85746	0.172103	-5.43426	-3.71807		0.0373363		-3.55095	2.61438	0.163302
P35684	10.8379	9.68862	11.68	11.3954	11.7844	10.924	3	3	6			1.60705	1.03731	2.48739	2.02753	2.59743	1.66979		1.90442						3.48957	2.15768	4.90294	4.05752	5.24014	3.42234			3.48957	2.15768	4.90294	4.05752	5.24014	3.42234		0.622188		0.723269	1.02627	0.490979
P35685	12.1726	11.5749	12.6105	10.2819	11.8996	11.8464	3	3	6			2.94174	2.92362	3.41789	0.914082	2.71262	2.59219		2.58369						6.38773	6.08135	6.73708	1.82928	5.47253	5.31285			6.38773	6.08135	6.73708	1.82928	5.47253	5.31285		0.049533		-2.19717	2.29795	0.203352
P35686	8.41227	3.94251	7.86648	10.7648	10.4253	9.30948	3	3	6			-0.818539	-4.70879	-1.3261	1.39694	1.23832	0.055274		-0.693817						-1.77739	-9.79465	-2.61391	2.79558	2.49822	0.113287			-1.77739	-9.79465	-2.61391	2.79558	2.49822	0.113287		0.200309		6.53101	3.80373	0.0716084
P37398	10.1123	8.76577	9.20254	10.2673	9.58575	8.02636	3	3	6			0.881497	0.11446	0.00996296	0.899407	0.398746	-1.22784		0.179371						1.91409	0.238085	0.0196382	1.79991	0.804445	-2.51654			1.91409	0.238085	0.0196382	1.79991	0.804445	-2.51654		0.347501		-0.694667	0.613154	0.653766
P37833	11.2224	9.67131	9.49356	10.2627	10.4722	10.0189	3	3	6			1.99162	1.02	0.300978	0.894834	1.28518	0.764693		1.04288						4.32463	2.12169	0.593264	1.79076	2.59276	1.56728			4.32463	2.12169	0.593264	1.79076	2.59276	1.56728		0.152668		-0.362923	0.389237	0.763533
P37834	10.2648	8.19894	8.34385	10.1246	9.20828	7.41929	3	3	6			1.03398	-0.452371	-0.848725	0.75679	0.0212781	-1.83492		-0.22066						2.2452	-0.940966	-1.67294	1.5145	0.0429273	-3.76077			2.2452	-0.940966	-1.67294	1.5145	0.0429273	-3.76077		0.738688		-0.611545	0.371938	0.772744
P37891	10.5694	10.4955	7.50985	7.56674	9.982	7.22333	3	3	6			1.33857	1.84415	-1.68272	-1.80111	0.79499	-2.03088		-0.256167						2.90658	3.83597	-3.31685	-3.60441	1.60384	-4.1624			2.90658	3.83597	-3.31685	-3.60441	1.60384	-4.1624		0.80144		-3.19623	1.58925	0.332344
P38419	9.59857	8.87517	9.83498	7.97487	9.73633	9.40092	3	3	6			0.367761	0.223859	0.642399	-1.39297	0.549329	0.14672		0.0895156						0.798561	0.465643	1.26625	-2.78765	1.10824	0.300711			0.798561	0.465643	1.26625	-2.78765	1.10824	0.300711		0.0736968		-1.30305	1.54786	0.342017
P40392	7.41193	8.99715	14.118	7.7364	9.89803	8.71987	3	3	6			-1.81888	0.345844	4.92547	-1.63145	0.711022	-0.534334		0.332947						-3.94953	0.719382	9.7087	-3.26488	1.43444	-1.09515			-3.94953	0.719382	9.7087	-3.26488	1.43444	-1.09515		0.20593		-3.13471	1.00009	0.499969
P40978	12.1664	8.8902	8.92692	12.1998	11.5831	9.83818	3	3	6			2.93563	0.238896	-0.265659	2.83192	2.39612	0.583977		1.45348						6.37447	0.496923	-0.523645	5.66729	4.83403	1.1969			6.37447	0.496923	-0.523645	5.66729	4.83403	1.1969		0.579225		1.78349	0.935422	0.52289
P41095	11.3518	9.7886	9.62383	12.0568	11.0444	11.4888	3	3	6			2.12095	1.1373	0.431249	2.68896	1.85739	2.23464		1.74508						4.60547	2.36566	0.850045	5.3812	3.74716	4.58003			4.60547	2.36566	0.850045	5.3812	3.74716	4.58003		0.315121		1.96241	2.52259	0.17403
P41345	7.27361	6.72533	11.1689	7.56651	9.5142	11.1675	3	3	6			-1.9572	-1.92597	1.97628	-1.80134	0.327196	1.91334		-0.244616						-4.24989	-4.00617	3.89549	-3.60487	0.660097	3.92151			-4.24989	-4.00617	3.89549	-3.60487	0.660097	3.92151		0.797636		1.7791	0.658984	0.633324
P41376	7.07414	7.30643	7.38939	7.29655	6.73417	6.76235	3	3	6			-2.15667	-1.34488	-1.80318	-2.0713	-2.45284	-2.49185		-2.05345						-4.68302	-2.79745	-3.55429	-4.14512	-4.94844	-5.1072			-4.68302	-2.79745	-3.55429	-4.14512	-4.94844	-5.1072		0.456145		-1.05533	2.59243	0.165806
P42863	7.59193	11.5075	8.6561	11.6056	9.82314	6.68075	3	3	6			-1.63888	2.85624	-0.536474	2.23772	0.636139	-2.57346		0.163549						-3.55868	5.9412	-1.05746	4.47818	1.28337	-5.27445			-3.55868	5.9412	-1.05746	4.47818	1.28337	-5.27445		0.990332		-0.279322	0.0767379	0.948199
P43279	11.7047	9.95816	10.0841	9.18908	11.3635	10.0748	3	3	6			2.47391	1.30685	0.891567	-0.178765	2.17653	0.820608		1.24845						5.37188	2.71836	1.75739	-0.357747	4.391	1.68189			5.37188	2.71836	1.75739	-0.357747	4.391	1.68189		0.763599		-1.37749	1.07385	0.475049
P46465	8.12949	5.79496	8.80187	10.7979	10.9047	8.58976	3	3	6			-1.10132	-2.85635	-0.390707	1.43006	1.7177	-0.664439		-0.310842						-2.39143	-5.94142	-0.770131	2.86186	3.46536	-1.36181			-2.39143	-5.94142	-0.770131	2.86186	3.46536	-1.36181		0.994392		4.68946	3.3959	0.0950021
P46466	8.37317	12.9287	9.17921	8.41688	10.7391	9.47243	3	3	6			-0.857643	4.27743	-0.0133648	-0.950966	1.5521	0.218224		0.704297						-1.8623	8.89739	-0.0263436	-1.90309	3.13126	0.447264			-1.8623	8.89739	-0.0263436	-1.90309	3.13126	0.447264		0.321496		-1.77777	0.622078	0.649734
P46773	11.961	9.27915	11.5016	11.9767	10.2842	12.5512	3	3	6			2.73017	0.627839	2.30901	2.6089	1.09724	3.29703		2.1117						5.92832	1.30595	4.55134	5.22097	2.21361	6.75745			5.92832	1.30595	4.55134	5.22097	2.21361	6.75745		0.973523		0.802141	0.521861	0.696473
P48489	10.6963	10.3253	11.2443	8.17463	7.95762	8.64191	3	3	6			1.46546	1.674	2.05173	-1.19322	-1.22938	-0.612295		0.359381						3.18212	3.48204	4.0442	-2.3879	-2.4802	-1.25494			3.18212	3.48204	4.0442	-2.3879	-2.4802	-1.25494		0.582957		-5.61046	11.8152	0.000277514
P48642	13.1678	7.42417	8.84021	13.7661	9.14063	9.1871	3	3	6			3.93697	-1.22714	-0.352366	4.39827	-0.0463797	-0.0670978		1.10704						8.54878	-2.55255	-0.694556	8.8019	-0.0935681	-0.137521			8.54878	-2.55255	-0.694556	8.8019	-0.0935681	-0.137521		0.856978		1.08971	0.282528	0.822149
P49027	6.5361	9.79069	10.0063	6.84134	8.73515	5.8651	3	3	6			-2.69471	1.13938	0.813749	-2.5265	-0.451855	-3.3891		-1.18484						-5.85133	2.37	1.604	-5.05609	-0.911589	-6.94616			-5.85133	2.37	1.604	-5.05609	-0.911589	-6.94616		0.631925		-3.67884	1.68764	0.310433
P49199	13.1031	11.7834	12.5246	10.8768	10.344	12.6836	3	3	6			3.87225	3.1321	3.33204	1.50898	1.15696	3.42936		2.73861						8.40824	6.51501	6.56785	3.01979	2.33409	7.02868			8.40824	6.51501	6.56785	3.01979	2.33409	7.02868		0.306188		-3.03618	2.95494	0.128966
P49210	12.2534	9.95026	9.43056	11.1536	10.3898	9.36157	3	3	6			3.02259	1.29896	0.23798	1.78577	1.20284	0.107369		1.27592						6.56329	2.70193	0.469087	3.57371	2.42666	0.220058			6.56329	2.70193	0.469087	3.57371	2.42666	0.220058		0.468176		-1.17129	0.747695	0.595554
P49216	7.68748	7.4465	9.69679	10.0925	10.2459	10.1687	3	3	6			-1.54333	-1.2048	0.504216	0.724645	1.0589	0.91447		0.0756835						-3.35121	-2.50608	0.993872	1.45017	2.13627	1.87426			-3.35121	-2.50608	0.993872	1.45017	2.13627	1.87426		0.0441748		3.44137	3.06532	0.119467
P49397	10.3227	9.4289	10.4738	10.7839	9.04297	11.2321	3	3	6			1.0919	0.777597	1.28123	1.41605	-0.144032	1.97786		1.06677						2.37097	1.61746	2.52546	2.83383	-0.290576	4.05374			2.37097	1.61746	2.52546	2.83383	-0.290576	4.05374		0.0897996		0.0276989	0.0228191	0.984307
P49398	12.1522	10.9031	10.7605	12.6325	11.9707	12.2649	3	3	6			2.92141	2.25182	1.56789	3.26462	2.78371	3.01068		2.63336						6.34358	4.68396	3.09051	6.53323	5.61596	6.17057			6.34358	4.68396	3.09051	6.53323	5.61596	6.17057		0.149273		1.40057	2.1538	0.22472
P49661	10.974	9.40992	9.86443	11.2755	8.22279	9.44402	3	3	6			1.74317	0.758614	0.671857	1.90764	-0.96421	0.189819		0.717815						3.78514	1.57798	1.32431	3.8176	-1.94523	0.389045			3.78514	1.57798	1.32431	3.8176	-1.94523	0.389045		0.358001		-1.47534	1.09184	0.469162
P51431	11.039	9.69	11.2228	11.0829	10.5317	11.2847	3	3	6			1.80817	1.03869	2.03022	1.7151	1.34467	2.03051		1.66123						3.92629	2.16056	4.0018	3.43229	2.71278	4.16164			3.92629	2.16056	4.0018	3.43229	2.71278	4.16164		0.651761		0.0726878	0.111313	0.925745
P52428	8.47752	8.51916	8.40977	10.8071	7.36894	7.98954	3	3	6			-0.753297	-0.132143	-0.782804	1.43927	-1.81806	-1.26467		-0.551951						-1.63572	-0.274867	-1.543	2.88029	-3.66782	-2.59201			-1.63572	-0.274867	-1.543	2.88029	-3.66782	-2.59201		0.0895724		0.0246804	0.0129314	0.991077
P53682	11.7181	9.70643	9.18611	9.303	7.51112	10.1621	3	3	6			2.48733	1.05512	-0.00646297	-0.0648435	-1.67588	0.907937		0.450533						5.40103	2.19473	-0.0127393	-0.129766	-3.38099	1.86087			5.40103	2.19473	-0.0127393	-0.129766	-3.38099	1.86087		0.971645		-3.07763	2.10188	0.232954
P53683	10.6819	9.09824	9.9103	9.53087	9.46352	9.11129	3	3	6			1.45104	0.446936	0.717721	0.163027	0.276519	-0.14291		0.485389						3.15081	0.92966	1.41471	0.326252	0.55786	-0.292903			3.15081	0.92966	1.41471	0.326252	0.55786	-0.292903		0.248468		-1.63466	3.54227	0.0858364
P53684	9.54301	9.80867	8.44352	7.21519	3.82405	8.95489	3	3	6			0.3122	1.15737	-0.749053	-2.15265	-5.36295	-0.299308		-1.1824						0.677915	2.40741	-1.47647	-4.30793	-10.8194	-0.61345			0.677915	2.40741	-1.47647	-4.30793	-10.8194	-0.61345		0.248374		-5.78321	2.7973	0.143856
P60300	8.47658	8.60177	10.0485	8.36194	10.0727	8.55286	3	3	6			-0.754228	-0.0495363	0.85591	-1.0059	0.885664	-0.701341		-0.128239						-1.63774	-0.103039	1.6871	-2.01303	1.78677	-1.43744			-1.63774	-0.103039	1.6871	-2.01303	1.78677	-1.43744		0.795335		-0.536676	0.429695	0.742419
P68560	9.32845	9.87963	7.34216	7.95431	8.64825	9.09674	3	3	6			0.097638	1.22832	-1.85041	-1.41354	-0.538755	-0.157461		-0.439034						0.212012	2.555	-3.64739	-2.82879	-1.0869	-0.322725			0.212012	2.555	-3.64739	-2.82879	-1.0869	-0.322725		0.287945		-1.11935	0.743044	0.597478
P84634	15.3618	14.0152	11.8989	11.3683	12.1882	11.2624	3	3	6			6.13099	5.36393	2.70636	2.00049	3.00115	2.00819		3.53519						13.3129	11.1574	5.33457	4.00343	6.05463	4.1159			13.3129	11.1574	5.33457	4.00343	6.05463	4.1159		0.144826		-5.21031	3.27978	0.102964
P92941	8.69898	7.73213	8.76119	6.43766	6.22545	9.40712	3	3	6			-0.53183	-0.919174	-0.431392	-2.93019	-2.96156	0.152917		-1.2702						-1.15482	-1.91195	-0.850325	-5.86395	-5.97475	0.313412			-1.15482	-1.91195	-0.850325	-5.86395	-5.97475	0.313412		0.0451038		-2.53606	1.53007	0.346261
P92942	9.45368	7.52223	10.0528	7.07714	11.6021	7.57984	3	3	6			0.22287	-1.12908	0.860263	-2.29071	2.41514	-1.67436		-0.26598						0.483942	-2.34857	1.69568	-4.58422	4.87238	-3.4317			0.483942	-2.34857	1.69568	-4.58422	4.87238	-3.4317		0.278587		-0.991528	0.371687	0.772878
P92943	9.52994	12.2585	9.13556	11.1126	12.0044	12.6126	3	3	6			0.299125	3.60717	-0.0570218	1.74472	2.81736	3.35837		1.96162						0.649525	7.50319	-0.112397	3.49157	5.68383	6.88317			0.649525	7.50319	-0.112397	3.49157	5.68383	6.88317		0.287879		2.67275	1.45447	0.364889
P93008	9.29338	9.96259	7.06695	10.9863	8.62498	8.92683	3	3	6			0.0625671	1.31129	-2.12563	1.61842	-0.562027	-0.327373		-0.00379221						0.135859	2.72757	-4.18987	3.23881	-1.13385	-0.67097			0.135859	2.72757	-4.18987	3.23881	-1.13385	-0.67097		0.641717		0.920143	0.461694	0.726133
P93411	8.90707	11.1561	5.20606	10.7279	11.1707	8.14949	3	3	6			-0.323742	2.50478	-3.98652	1.36007	1.98367	-1.10471		0.0722581						-0.702976	5.21012	-7.85791	2.7218	4.00193	-2.26417			-0.702976	5.21012	-7.85791	2.7218	4.00193	-2.26417		0.407585		2.60344	0.806186	0.571892
P93422	11.8391	10.1472	10.6111	8.88765	12.0133	10.3669	3	3	6			2.60831	1.4959	1.41854	-0.480201	2.82632	1.11267		1.49692						5.66372	3.11158	2.79611	-0.960987	5.70191	2.28048			5.66372	3.11158	2.79611	-0.960987	5.70191	2.28048		0.364328		-1.51667	0.956725	0.515225
P93771	9.32984	8.68622	8.6237	12.2954	7.07414	10.2113	3	3	6			0.0990286	0.0349133	-0.568879	2.92758	-2.11286	0.957078		0.222809						0.215032	0.0726222	-1.12133	5.85872	-4.26257	1.96159			0.215032	0.0726222	-1.12133	5.85872	-4.26257	1.96159		0.040497		1.46381	0.577863	0.669955
P93823	8.87722	8.71802	7.67306	8.6326	7.88173	6.53257	3	3	6			-0.35359	0.066712	-1.51952	-0.735252	-1.30528	-2.72164		-1.09476						-0.767789	0.138766	-2.99515	-1.4714	-2.63332	-5.57816			-0.767789	0.138766	-2.99515	-1.4714	-2.63332	-5.57816		0.734464		-2.01957	1.94897	0.259001
P93844	9.2654	9.6868	11.4961	9.88387	7.93174	10.9895	3	3	6			0.0345915	1.03549	2.30348	0.516017	-1.25526	1.73526		0.728263						0.0751124	2.1539	4.54043	1.03266	-2.53241	3.55653			0.0751124	2.1539	4.54043	1.03266	-2.53241	3.55653		0.695755		-1.57089	0.964825	0.512341
Q00058	9.37773	7.51128	10.9979	10.902	11.3318	9.31768	3	3	6			0.146919	-1.14003	1.80531	1.53415	2.14481	0.0634816		0.759106						0.319021	-2.37135	3.55848	3.07017	4.32701	0.130109			0.319021	-2.37135	3.55848	3.07017	4.32701	0.130109		0.689625		2.00705	1.33298	0.396948
Q00847	10.6515	9.57732	9.2107	9.91588	10.2527	13.0931	3	3	6			1.42069	0.926008	0.0181185	0.548032	1.06566	3.83887		1.3029						3.0849	1.92617	0.0357137	1.09673	2.1499	7.86799			3.0849	1.92617	0.0357137	1.09673	2.1499	7.86799		0.302845		2.02261	1.2317	0.425814
Q01209	11.1187	8.70826	9.9004	8.56636	9.06692	9.29216	3	3	6			1.88787	0.0569491	0.707822	-0.801489	-0.120082	0.0379582		0.294838						4.09934	0.118458	1.3952	-1.60396	-0.242257	0.0777976			4.09934	0.118458	1.3952	-1.60396	-0.242257	0.0777976		0.323583		-2.46047	2.97323	0.127341
Q01401	10.1018	10.6766	9.49139	9.90447	9.64656	9.35213	3	3	6			0.871032	2.02527	0.298815	0.536621	0.459554	0.0979293		0.71487						1.89137	4.21271	0.589	1.0739	0.92712	0.200712			1.89137	4.21271	0.589	1.0739	0.92712	0.200712		0.121858		-1.49712	2.04188	0.242847
Q01859	13.5878	11.5904	11.5539	13.752	13.0506	12.9003	3	3	6			4.35696	2.93909	2.36129	4.38411	3.86363	3.64606		3.59186						9.46077	6.11354	4.65439	8.77357	7.79462	7.47282			9.46077	6.11354	4.65439	8.77357	7.79462	7.47282		0.140546		1.27077	1.19209	0.437669
Q01MI9	9.31436	9.20626	8.90839	6.14254	5.59726	8.42882	3	3	6			0.0835441	0.55495	-0.284185	-3.22531	-3.58974	-0.825382		-1.21435						0.181409	1.15434	-0.560162	-6.45456	-7.24207	-1.69167			0.181409	1.15434	-0.560162	-6.45456	-7.24207	-1.69167		0.151534		-5.38796	4.62811	0.0404391
Q02119	11.5313	11.5078	12.172	12.9011	12.4441	11.4772	3	3	6			2.30052	2.85654	2.97944	3.53328	3.25705	2.223		2.85831						4.99538	5.94181	5.87284	7.07087	6.57089	4.55617			4.99538	5.94181	5.87284	7.07087	6.57089	4.55617		0.271546		0.462634	0.723525	0.605616
Q02897	13.1769	13.8101	15.9484	9.41323	16.4335	13.374	3	3	6			3.94609	5.15876	6.75581	0.0453781	7.24648	4.11975		4.54538						8.56859	10.7306	13.3165	0.0908115	14.6193	8.44367			8.56859	10.7306	13.3165	0.0908115	14.6193	8.44367		0.192151		-3.15398	0.955643	0.515612
Q03200	8.507	7.87061	9.47005	8.92327	7.43438	6.67257	3	3	6			-0.723811	-0.780696	0.277472	-0.44458	-1.75263	-2.58164		-1.00098						-1.57169	-1.62391	0.54693	-0.889702	-3.53581	-5.29122			-1.57169	-1.62391	0.54693	-0.889702	-3.53581	-5.29122		0.476135		-2.35602	2.44852	0.183199
Q05054	14.6727	13.4051	9.22733	7.88789	10.4399	14.139	3	3	6			5.44189	4.75383	0.0347499	-1.47996	1.25293	4.88479		2.48137						11.8166	9.88834	0.0684963	-2.96172	2.52771	10.0117			11.8166	9.88834	0.0684963	-2.96172	2.52771	10.0117		0.966937		-4.06525	1.05738	0.480502
Q06397	7.1636	5.14343	8.27877	9.52054	4.23986	9.2754	3	3	6			-2.06721	-3.50787	-0.913803	0.152692	-4.94715	0.0212005		-1.87702						-4.48877	-7.29664	-1.80122	0.305571	-9.98055	0.0434517			-4.48877	-7.29664	-1.80122	0.305571	-9.98055	0.0434517		0.360063		1.31837	0.430133	0.742193
Q06398	11.6633	8.83536	9.79578	11.4531	11.8913	10.1599	3	3	6			2.43248	0.184049	0.603203	2.08522	2.70432	0.905669		1.48582						5.28191	0.382835	1.18899	4.17298	5.4558	1.85622			5.28191	0.382835	1.18899	4.17298	5.4558	1.85622		0.650774		1.54375	1.15147	0.450167
Q06967	11.3562	13.1601	6.78764	9.47267	11.4977	10.2169	3	3	6			2.12536	4.50878	-2.40494	0.104823	2.31065	0.962665		1.26789						4.61504	9.37862	-4.74042	0.209773	4.66158	1.97304			4.61504	9.37862	-4.74042	0.209773	4.66158	1.97304		0.177535		-0.802947	0.213641	0.862358
Q08479	8.4261	7.11811	8.09186	9.95112	12.6293	11.9575	3	3	6			-0.804716	-1.5332	-1.10072	0.583277	3.44233	2.7033		0.548379						-1.74737	-3.18917	-2.16965	1.16726	6.94468	5.54057			-1.74737	-3.18917	-2.16965	1.16726	6.94468	5.54057		0.114121		6.91957	5.78703	0.0181105
Q08480	10.021	8.17333	10.8698	12.3854	10.1077	9.3936	3	3	6			0.790167	-0.47798	1.67725	3.01756	0.920735	0.139403		1.01119						1.71578	-0.994234	3.30606	6.03879	1.85752	0.285714			1.71578	-0.994234	3.30606	6.03879	1.85752	0.285714		0.696799		1.38481	0.861249	0.550476
Q09151	11.7349	11.7564	12.8768	10.282	14.0132	11.0341	3	3	6			2.50407	3.10512	3.68423	0.914198	4.82623	1.77991		2.80229						5.43736	6.45889	7.26206	1.82951	9.73661	3.64803			5.43736	6.45889	7.26206	1.82951	9.73661	3.64803		0.0929988		-1.31472	0.690158	0.619786
Q09J78	9.4957	9.85323	8.2426	10.3874	9.22079	9.78436	3	3	6			0.264883	1.20192	-0.949975	1.01952	0.0337844	0.530154		0.350049						0.575169	2.50009	-1.87252	2.04029	0.0681579	1.08658			0.575169	2.50009	-1.87252	2.04029	0.0681579	1.08658		0.336835		0.664094	0.60562	0.657189
Q09J79	8.64724	5.67987	9.32571	8.52219	8.96049	8.22853	3	3	6			-0.58357	-2.97143	0.133133	-0.845659	-0.226511	-1.02567		-0.919952						-1.26717	-6.18081	0.262421	-1.69235	-0.456971	-2.10218			-1.26717	-6.18081	0.262421	-1.69235	-0.456971	-2.10218		0.121571		0.97802	0.618578	0.651313
Q0D3C8	8.54601	9.83897	10.8485	5.49249	10.8556	9.8015	3	3	6			-0.684806	1.18766	1.65597	-3.87535	1.66856	0.547296		0.0832215						-1.487	2.47042	3.26411	-7.75543	3.36622	1.12172			-1.487	2.47042	3.26411	-7.75543	3.36622	1.12172		0.31546		-2.50501	0.901036	0.535502
Q0D3D2	6.35166	9.29172	8.05945	9.21121	8.90572	8.48728	3	3	6			-2.87915	0.640416	-1.13312	-0.156641	-0.281287	-0.766925		-0.762785						-6.25182	1.33211	-2.23353	-0.313473	-0.567479	-1.57186			-6.25182	1.33211	-2.23353	-0.313473	-0.567479	-1.57186		0.0596818		1.56681	0.943468	0.519982
Q0D3F2	8.5125	10.6557	9.09387	9.19749	9.82666	8.76997	3	3	6			-0.718309	2.0044	-0.0987107	-0.170361	0.639655	-0.484232		0.195407						-1.55974	4.16931	-0.194571	-0.340929	1.29046	-0.992463			-1.55974	4.16931	-0.194571	-0.340929	1.29046	-0.992463		0.267551		-0.819308	0.552663	0.681761
Q0D3J9	8.49321	8.46581	10.6259	9.71567	9.05883	11.0183	3	3	6			-0.737598	-0.185496	1.43331	0.347822	-0.128174	1.76414		0.415668						-1.60163	-0.385845	2.82524	0.696069	-0.258584	3.6157			-1.60163	-0.385845	2.82524	0.696069	-0.258584	3.6157		0.875689		1.07181	0.796677	0.575674
Q0D3S3	10.4153	7.60999	10.7279	10.8698	10.9422	10.4942	3	3	6			1.18451	-1.04132	1.53534	1.50198	1.75522	1.23995		1.02928						2.57205	-2.16602	3.02635	3.00579	3.54104	2.54136			2.57205	-2.16602	3.02635	3.00579	3.54104	2.54136		0.0587482		1.88527	1.61749	0.325903
Q0D4B2	12.828	10.125	10.0979	13.6372	10.5756	12.0075	3	3	6			3.59715	1.47372	0.905323	4.26934	1.38863	2.75332		2.39791						7.81088	3.06545	1.7845	8.54389	2.80147	5.64308			7.81088	3.06545	1.7845	8.54389	2.80147	5.64308		0.899834		1.44254	0.759359	0.590759
Q0D4J7	7.55735	6.54668	7.69349	9.57735	4.59711	10.8542	3	3	6			-1.67346	-2.10463	-1.49909	0.209505	-4.58989	1.59996		-1.34293						-3.63378	-4.37779	-2.95489	0.419266	-9.25981	3.27922			-3.63378	-4.37779	-2.95489	0.419266	-9.25981	3.27922		0.0231876		1.80171	0.551328	0.682392
Q0D4T4	7.2854	9.13825	10.4376	9.62554	8.95166	8.61508	3	3	6			-1.94541	0.486939	1.24507	0.257697	-0.235341	-0.639125		-0.138362						-4.22429	1.01287	2.45419	0.515707	-0.474786	-1.30992			-4.22429	1.01287	2.45419	0.515707	-0.474786	-1.30992		0.126682		-0.17059	0.0907133	0.939058
Q0D519	10.9958	9.70504	10.049	8.88212	10.7159	11.176	3	3	6			1.76503	1.05374	0.856454	-0.485725	1.52887	1.92185		1.1067						3.8326	2.19185	1.68818	-0.972041	3.0844	3.93894			3.8326	2.19185	1.68818	-0.972041	3.0844	3.93894		0.308894		-0.553777	0.40805	0.753641
Q0D541	10.8396	7.72137	8.61824	6.57284	11.8328	6.9863	3	3	6			1.60878	-0.929934	-0.574339	-2.795	2.64577	-2.26791		-0.385438						3.49333	-1.93433	-1.13209	-5.59341	5.33766	-4.64821			3.49333	-1.93433	-1.13209	-5.59341	5.33766	-4.64821		0.379221		-1.77696	0.575428	0.671087
Q0D576	3.09194	10.9773	7.50637	7.80826	7.65664	7.83099	3	3	6			-6.13888	2.32597	-1.68621	-1.55959	-1.53037	-1.42321		-1.66871						-13.33	4.8382	-3.32372	-3.12108	-3.08741	-2.91696			-13.33	4.8382	-3.32372	-3.12108	-3.08741	-2.91696		0.00028922		0.896698	0.18412	0.880186
Q0D598	11.3566	9.55934	8.56564	11.606	10.8111	10.1408	3	3	6			2.1258	0.908032	-0.626942	2.23814	1.62405	0.886627		1.19262						4.616	1.88878	-1.23578	4.47901	3.27641	1.8172			4.616	1.88878	-1.23578	4.47901	3.27641	1.8172		0.343318		1.43454	1.04981	0.483032
Q0D5B9	10.2377	7.7922	8.13638	8.34247	10.0218	9.58259	3	3	6			1.00688	-0.859102	-1.0562	-1.02537	0.834808	0.328391		-0.128434						2.18634	-1.787	-2.0819	-2.052	1.68417	0.673058			2.18634	-1.787	-2.0819	-2.052	1.68417	0.673058		0.793183		0.662597	0.4592	0.72739
Q0D5G4	10.5681	10.9402	9.23771	10.9813	11.1528	9.77442	3	3	6			1.33724	2.28893	0.0451347	1.61343	1.96579	0.520222		1.29512						2.9037	4.76115	0.0889659	3.22884	3.96585	1.06623			2.9037	4.76115	0.0889659	3.22884	3.96585	1.06623		0.582014		0.169031	0.117814	0.921583
Q0D5P3	11.8006	10.9943	12.3384	11.7102	11.6437	11.7051	3	3	6			2.5698	2.34298	3.14585	2.34236	2.45672	2.45091		2.55144						5.5801	4.87357	6.20086	4.68757	4.95627	5.02329			5.5801	4.87357	6.20086	4.68757	4.95627	5.02329		0.133587		-0.662468	2.55279	0.170426
Q0D5R2	9.89253	9.58682	11.0398	9.97513	7.37295	11.2949	3	3	6			0.661715	0.935514	1.84723	0.607284	-1.81405	2.04065		0.713057						1.43686	1.94594	3.64112	1.21531	-3.65974	4.18243			1.43686	1.94594	3.64112	1.21531	-3.65974	4.18243		0.156604		-1.76197	0.998835	0.500404
Q0D5R3	8.06577	11.8102	13.7368	9.95082	14.5941	11.2406	3	3	6			-1.16505	3.1589	4.54425	0.58297	5.40709	1.98635		2.41909						-2.5298	6.57076	8.95726	1.16665	10.9084	4.07114			-2.5298	6.57076	8.95726	1.16665	10.9084	4.07114		0.810067		1.04934	0.271512	0.828451
Q0D622	10.7556	9.65374	11.2285	10.0137	11.7665	12.2966	3	3	6			1.52483	1.00243	2.03588	0.645894	2.57952	3.04243		1.80516						3.31103	2.08514	4.01297	1.29257	5.20402	6.23564			3.31103	2.08514	4.01297	1.29257	5.20402	6.23564		0.245629		1.1077	0.919629	0.528645
Q0D629	9.89007	11.2253	12.0312	11.0782	11.0015	8.59593	3	3	6			0.659254	2.57396	2.83864	1.7103	1.81454	-0.658274		1.48974						1.43151	5.35403	5.59531	3.42269	3.66073	-1.34917			1.43151	5.35403	5.59531	3.42269	3.66073	-1.34917		0.81235		-2.21554	1.49622	0.35448
Q0D673	13.2003	7.65735	8.41219	6.92327	9.90188	8.77056	3	3	6			3.96947	-0.993953	-0.780388	-2.44458	0.714873	-0.483638		-0.00303554						8.61936	-2.0675	-1.53824	-4.89214	1.44221	-0.991244			8.61936	-2.0675	-1.53824	-4.89214	1.44221	-0.991244		0.439271		-3.1516	1.09477	0.468212
Q0D6F4	7.59924	9.98968	11.4588	11.2321	10.8944	7.91821	3	3	6			-1.63157	1.33837	2.26624	1.86427	1.70743	-1.336		0.701459						-3.54281	2.78391	4.46703	3.73082	3.44464	-2.7382			-3.54281	2.78391	4.46703	3.73082	3.44464	-2.7382		0.856497		0.243039	0.0838435	0.943541
Q0D6V7	9.96029	8.49649	8.75989	11.5075	8.82753	10.5317	3	3	6			0.729479	-0.154813	-0.432689	2.1397	-0.359472	1.27747		0.533279						1.584	-0.322022	-0.852882	4.28201	-0.725211	2.61825			1.584	-0.322022	-0.852882	4.28201	-0.725211	2.61825		0.40322		1.92199	1.69785	0.308245
Q0D715	12.3951	11.4283	8.26571	11.2295	11.5539	11.9616	3	3	6			3.16429	2.77695	-0.926868	1.86163	2.36686	2.70736		1.9917						6.87098	5.77626	-1.82697	3.72553	4.775	5.54889			6.87098	5.77626	-1.82697	3.72553	4.775	5.54889		0.0719452		1.07638	0.476172	0.718882
Q0D7E4	9.62483	9.71696	5.84932	8.36623	9.83889	11.1572	3	3	6			0.394019	1.06565	-3.34325	-1.00161	0.651884	1.90296		-0.0550598						0.855578	2.21663	-6.58996	-2.00445	1.31513	3.90022			0.855578	2.21663	-6.58996	-2.00445	1.31513	3.90022		0.560983		2.24288	0.928894	0.525261
Q0D7I3	11.3446	8.34114	8.90352	4.82411	7.79669	4.55815	3	3	6			2.11382	-0.310166	-0.289057	-4.54374	-1.39032	-4.69606		-1.51925						4.58997	-0.64517	-0.569766	-9.09302	-2.80487	-9.62485			4.58997	-0.64517	-0.569766	-9.09302	-2.80487	-9.62485		0.769891		-8.29926	4.60591	0.0410661
Q0D840	11.514	7.99712	10.5479	12.5904	11.5392	12.3725	3	3	6			2.28316	-0.654184	1.35528	3.22253	2.35215	3.11831		1.94621						4.95768	-1.36075	2.67142	6.44899	4.74532	6.39116			4.95768	-1.36075	2.67142	6.44899	4.74532	6.39116		0.167544		3.77237	3.032	0.122258
Q0D8D4	12.2588	12.4867	10.1614	11.8583	12.6844	12.9547	3	3	6			3.02799	3.83543	0.968807	2.49044	3.49741	3.70045		2.92009						6.57501	7.97798	1.90964	4.98392	7.05581	7.58429			6.57501	7.97798	1.90964	4.98392	7.05581	7.58429		0.3153		1.0538	0.676037	0.625882
Q0D8I9	9.19786	8.24408	9.81176	8.51195	10.4789	8.38159	3	3	6			-0.032957	-0.407229	0.619183	-0.855898	1.29187	-0.872616		-0.0429418						-0.0715633	-0.847067	1.22048	-1.71284	2.60626	-1.78848			-0.0715633	-0.847067	1.22048	-1.71284	2.60626	-1.78848		0.294053		-0.398972	0.30002	0.812241
Q0D8N0	7.61294	10.6062	8.84831	10.6845	10.6731	11.4294	3	3	6			-1.61787	1.95491	-0.344267	1.31664	1.48613	2.17515		0.828449						-3.51306	4.06637	-0.678592	2.63488	2.99817	4.4581			-3.51306	4.06637	-0.678592	2.63488	2.99817	4.4581		0.119412		3.40548	2.25431	0.209597
Q0D9C4	10.5629	8.9587	10.2989	12.3194	11.0905	10.5754	3	3	6			1.3321	0.307391	1.10629	2.9516	1.9035	1.32124		1.48702						2.89253	0.639396	2.18063	5.9068	3.8402	2.70797			2.89253	0.639396	2.18063	5.9068	3.8402	2.70797		0.670383		2.24747	3.03507	0.121998
Q0D9C7	9.64382	8.02209	8.77103	10.0947	9.93195	9.42641	3	3	6			0.413008	-0.629217	-0.42155	0.72689	0.744944	0.172209		0.167714						0.896809	-1.30882	-0.830926	1.45467	1.50288	0.352953			0.896809	-1.30882	-0.830926	1.45467	1.50288	0.352953		0.478195		1.51781	3.06732	0.119302
Q0D9J1	11.2505	8.48587	8.02934	10.5926	8.38892	9.70179	3	3	6			2.01972	-0.165438	-1.16323	1.2247	-0.798084	0.447589		0.260876						4.38565	-0.344123	-2.29288	2.4509	-1.61008	0.917361			4.38565	-0.344123	-2.29288	2.4509	-1.61008	0.917361		0.525638		0.00317541	0.00148852	0.998969
Q0D9R7	8.67359	8.68243	6.42009	9.60759	11.3784	9.12779	3	3	6			-0.557221	0.0311257	-2.77248	0.239741	2.1914	-0.126414		-0.165642						-1.20996	0.0647439	-5.4649	0.479775	4.421	-0.259094			-1.20996	0.0647439	-5.4649	0.479775	4.421	-0.259094		0.860415		3.7506	2.59411	0.165613
Q0D9S3	8.54404	6.86654	7.06577	8.00904	8.47909	7.83479	3	3	6			-0.686775	-1.78477	-2.12681	-1.3588	-0.707912	-1.41942		-1.34741						-1.49127	-3.71246	-4.1922	-2.71926	-1.42817	-2.90918			-1.49127	-3.71246	-4.1922	-2.71926	-1.42817	-2.90918		0.47647		0.779775	1.12261	0.459261
Q0D9V6	6.98322	8.12949	7.5624	8.75278	8.22052	8.43233	3	3	6			-2.24759	-0.521818	-1.63018	-0.615066	-0.966482	-0.821869		-1.13383						-4.88045	-1.08542	-3.21329	-1.23088	-1.94981	-1.68447			-4.88045	-1.08542	-3.21329	-1.23088	-1.94981	-1.68447		0.0704825		1.438	1.90076	0.267802
Q0DA21	8.03974	9.60727	8.85773	11.5767	9.72079	9.94568	3	3	6			-1.19107	0.955968	-0.334845	2.20883	0.533786	0.691476		0.477357						-2.58631	1.98849	-0.66002	4.42034	1.07688	1.41722			-2.58631	1.98849	-0.66002	4.42034	1.07688	1.41722		0.781775		2.72409	2.44106	0.184149
Q0DA50	7.08513	9.78922	10.7543	6.49534	5.44685	9.2484	3	3	6			-2.14569	1.13792	1.56173	-2.8725	-3.74015	-0.00580037		-1.01075						-4.65917	2.36695	3.07835	-5.74851	-7.54552	-0.0118882			-4.65917	2.36695	3.07835	-5.74851	-7.54552	-0.0118882		0.916856		-4.69735	2.09482	0.234097
Q0DAE4	3.16951	8.58601	8.22473	7.83099	4.62877	7.81327	3	3	6			-6.0613	-0.065293	-0.967852	-1.53686	-4.55823	-1.44093		-2.43841						-13.1616	-0.135814	-1.90775	-3.07559	-9.19594	-2.95328			-13.1616	-0.135814	-1.90775	-3.07559	-9.19594	-2.95328		0.406723		-0.00655068	0.00155186	0.998925
Q0DAE8	8.04122	8.88258	8.72189	5.8009	9.13173	10.7213	3	3	6			-1.18959	0.231275	-0.470692	-3.56695	-0.0552766	1.46707		-0.597361						-2.58309	0.481069	-0.927791	-7.13824	-0.111517	3.00684			-2.58309	0.481069	-0.927791	-7.13824	-0.111517	3.00684		0.160263		-0.404368	0.146586	0.903385
Q0DB53	11.4738	8.69579	7.54241	11.2201	9.85629	11.7718	3	3	6			2.24294	0.044478	-1.65016	1.85223	0.66928	2.51758		0.946057						4.87035	0.0925176	-3.25267	3.70671	1.35023	5.15992			4.87035	0.0925176	-3.25267	3.70671	1.35023	5.15992		0.363047		2.83556	1.56653	0.337619
Q0DBD3	9.9089	6.42058	10.6996	9.18639	10.9533	11.1383	3	3	6			0.67809	-2.23072	1.507	-0.181461	1.76632	1.88407		0.570548						1.47241	-4.64007	2.97047	-0.363144	3.56343	3.86151			1.47241	-4.64007	2.97047	-0.363144	3.56343	3.86151		0.509691		2.41966	1.25061	0.42027
Q0DBF4	4.71507	8.29246	8.84354	9.56931	5.6033	6.69028	3	3	6			-4.51574	-0.358847	-0.349033	0.201457	-3.58371	-2.56392		-1.86163						-9.80554	-0.74643	-0.687986	0.40316	-7.22989	-5.25492			-9.80554	-0.74643	-0.687986	0.40316	-7.22989	-5.25492		0.726181		-0.280566	0.0821782	0.94463
Q0DBL6	9.52335	6.99865	9.09014	7.95664	7.09677	2.32737	3	3	6			0.292534	-1.65266	-0.102438	-1.41121	-2.09024	-6.92683		-1.98181						0.635211	-3.43766	-0.201918	-2.82414	-4.21692	-14.197			0.635211	-3.43766	-0.201918	-2.82414	-4.21692	-14.197		0.214653		-6.07788	2.44135	0.184112
Q0DBS1	10.0941	7.74093	9.29932	9.07205	8.4765	9.67812	3	3	6			0.863265	-0.91038	0.106745	-0.295796	-0.710502	0.423922		-0.087124						1.8745	-1.89366	0.210408	-0.591952	-1.43339	0.868854			1.8745	-1.89366	0.210408	-0.591952	-1.43339	0.868854		0.551317		-0.449248	0.427586	0.743505
Q0DBU5	11.1913	10.1361	8.50482	8.7237	10.864	11.0715	3	3	6			1.96049	1.48479	-0.687758	-0.644153	1.67703	1.81726		0.934609						4.25704	3.08847	-1.35565	-1.28909	3.38329	3.72458			4.25704	3.08847	-1.35565	-1.28909	3.38329	3.72458		0.9445		-0.0570228	0.0264539	0.981831
Q0DBW8	8.68229	8.69575	9.17822	8.61032	9.44911	6.7961	3	3	6			-0.54852	0.0444432	-0.0143605	-0.757524	0.262102	-2.4581		-0.57866						-1.19106	0.0924452	-0.0283064	-1.51597	0.528775	-5.03802			-1.19106	0.0924452	-0.0283064	-1.51597	0.528775	-5.03802		0.119156		-1.63276	1.37619	0.385236
Q0DC45	10.2789	11.5346	10.6709	9.05344	10.4368	9.16063	3	3	6			1.0481	2.88329	1.47834	-0.314411	1.24981	-0.0935746		1.04193						2.27586	5.99746	2.914	-0.629205	2.52141	-0.191787			2.27586	5.99746	2.914	-0.629205	2.52141	-0.191787		0.84759		-3.1623	3.25238	0.104939
Q0DCT8	10.2483	8.00489	9.08738	5.93395	8.19717	12.0455	3	3	6			1.01747	-0.646413	-0.105194	-3.4339	-0.989837	2.79132		-0.227759						2.20935	-1.34459	-0.20735	-6.87198	-1.99693	5.72097			2.20935	-1.34459	-0.20735	-6.87198	-1.99693	5.72097		0.151057		-1.26845	0.403387	0.756081
Q0DDI1	6.50898	8.56453	9.52662	8.59186	9.01246	7.83327	3	3	6			-2.72183	-0.0867765	0.334039	-0.775989	-0.174548	-1.42093		-0.807673						-5.91021	-0.180502	0.658432	-1.55292	-0.352139	-2.91229			-5.91021	-0.180502	0.658432	-1.55292	-0.352139	-2.91229		0.227545		0.204977	0.104684	0.930009
Q0DEB8	8.49538	5.00693	10.8365	5.8135	8.90878	5.07519	3	3	6			-0.735437	-3.64438	1.64395	-3.55435	-0.278222	-4.17901		-1.79124						-1.59694	-7.58059	3.24042	-7.11303	-0.561295	-8.56514			-1.59694	-7.58059	3.24042	-7.11303	-0.561295	-8.56514		0.764525		-3.43412	1.19402	0.437083
Q0DEC8	11.0479	8.82031	5.66832	9.82861	10.9964	10.0914	3	3	6			1.81706	0.169	-3.52426	0.460765	1.8094	0.837233		0.261533						3.94559	0.351532	-6.94674	0.922091	3.65034	1.71596			3.94559	0.351532	-6.94674	0.922091	3.65034	1.71596		0.120173		2.97934	1.25725	0.418342
Q0DFT7	11.5708	7.41954	9.07462	5.51185	7.54651	10.4544	3	3	6			2.33994	-1.23177	-0.117954	-3.856	-1.6405	1.2002		-0.551012						5.08098	-2.56217	-0.232502	-7.7167	-3.3096	2.45988			5.08098	-2.56217	-0.232502	-7.7167	-3.3096	2.45988		0.741519		-3.61758	1.37615	0.385246
Q0DG35	11.9236	9.8094	11.0891	12.1877	10.9883	11.9977	3	3	6			2.69281	1.15809	1.89654	2.81984	1.80132	2.74351		2.18535						5.8472	2.40892	3.73831	5.64313	3.63406	5.62298			5.8472	2.40892	3.73831	5.64313	3.63406	5.62298		0.614127		0.968576	1.10249	0.465712
Q0DGD7	9.62501	11.3005	8.7704	8.24389	6.30939	10.7987	3	3	6			0.394202	2.64922	-0.422178	-1.12396	-2.87761	1.54451		0.0273639						0.855975	5.51057	-0.832163	-2.24929	-5.80539	3.16557			0.855975	5.51057	-0.832163	-2.24929	-5.80539	3.16557		0.69176		-3.4745	1.54821	0.341933
Q0DGG8	6.53608	6.49913	7.13648	6.70501	8.56647	6.66064	3	3	6			-2.69473	-2.15218	-2.0561	-2.66284	-0.620532	-2.59356		-2.12999						-5.85137	-4.4767	-4.05282	-5.32892	-1.25188	-5.31567			-5.85137	-4.4767	-4.05282	-5.32892	-1.25188	-5.31567		0.275964		0.828136	0.734049	0.601214
Q0DGP6	10.3279	10.8336	10.2441	11.4074	9.89242	9.17063	3	3	6			1.09708	2.18229	1.05155	2.03953	0.705416	-0.0835762		1.16538						2.38221	4.53934	2.07273	4.08154	1.42313	-0.171295			2.38221	4.53934	2.07273	4.08154	1.42313	-0.171295		0.562337		-1.2203	1.14832	0.451149
Q0DGS1	8.39172	10.1605	8.66032	11.8438	8.2937	7.65843	3	3	6			-0.839096	1.50919	-0.53226	2.47599	-0.893303	-1.59578		0.0207921						-1.82202	3.13924	-1.04915	4.95501	-1.80218	-3.27064			-1.82202	3.13924	-1.04915	4.95501	-1.80218	-3.27064		0.5404		-0.128627	0.0477031	0.967475
Q0DH40	9.49943	9.96025	9.58483	9.16672	8.61121	9.1405	3	3	6			0.268615	1.30894	0.392254	-0.201132	-0.575796	-0.113705		0.179863						0.583273	2.7227	0.77318	-0.40251	-1.16163	-0.233045			0.583273	2.7227	0.77318	-0.40251	-1.16163	-0.233045		0.296983		-1.95878	4.12393	0.0573553
Q0DHC4	13.5824	10.0344	10.265	10.7418	7.78921	9.47027	3	3	6			4.35156	1.38308	1.07245	1.37396	-1.3978	0.21607		1.16655						9.44904	2.87691	2.11393	2.74959	-2.81997	0.442849			9.44904	2.87691	2.11393	2.74959	-2.81997	0.442849		0.650042		-4.68914	2.52828	0.173346
Q0DHF6	9.40807	6.29637	9.50615	6.31891	8.96203	8.20516	3	3	6			0.177262	-2.35494	0.313572	-3.04893	-0.224977	-1.04904		-1.03118						0.38491	-4.89846	0.618088	-6.10159	-0.453876	-2.15008			0.38491	-4.89846	0.618088	-6.10159	-0.453876	-2.15008		0.926348		-1.60336	0.862872	0.549857
Q0DHL4	7.51246	7.51467	8.46646	8.47837	8.59238	10.4642	3	3	6			-1.71835	-1.13663	-0.726113	-0.889483	-0.594623	1.21004		-0.642527						-3.73124	-2.36428	-1.43126	-1.78005	-1.19961	2.48004			-3.73124	-2.36428	-1.43126	-1.78005	-1.19961	2.48004		0.400909		2.34239	2.385	0.191444
Q0DI48	13.0666	8.5097	9.27263	11.703	9.46793	9.10533	3	3	6			3.83576	-0.141611	0.0800526	2.33515	0.280927	-0.14887		1.04023						8.32902	-0.294562	0.157793	4.67314	0.566751	-0.305118			8.32902	-0.294562	0.157793	4.67314	0.566751	-0.305118		0.461569		-1.08583	0.412991	0.751065
Q0DIQ5	11.2932	10.8966	11.4006	11.572	10.3176	12.7722	3	3	6			2.06243	2.24525	2.20798	2.20419	1.13063	3.51803		2.22809						4.47838	4.6703	4.3522	4.41107	2.28098	7.21041			4.47838	4.6703	4.3522	4.41107	2.28098	7.21041		0.00836007		0.13386	0.0986492	0.933907
Q0DIT2	10.107	9.13103	9.13779	8.64165	8.77545	9.43496	3	3	6			0.876143	0.479727	-0.0547919	-0.726193	-0.411559	0.180759		0.0573474						1.90247	0.997868	-0.108002	-1.45327	-0.830294	0.370477			1.90247	0.997868	-0.108002	-1.45327	-0.830294	0.370477		0.917502		-1.56847	3.08151	0.118134
Q0DIV0	9.75054	9.56081	8.35429	10.0167	10.3818	4.39637	3	3	6			0.519727	0.909503	-0.838284	0.648821	1.19475	-4.85784		-0.403886						1.12854	1.89184	-1.65236	1.29843	2.41034	-9.95643			1.12854	1.89184	-1.65236	1.29843	2.41034	-9.95643		0.138388		-2.53856	0.813985	0.568808
Q0DJ33	9.26997	11.4626	9.3017	11.3711	6.73836	9.72381	3	3	6			0.0391556	2.8113	0.109125	2.00328	-2.44864	0.469612		0.497304						0.085023	5.84771	0.215098	4.00899	-4.93998	0.962498			0.085023	5.84771	0.215098	4.00899	-4.93998	0.962498		0.686753		-2.03877	0.827434	0.563531
Q0DJ94	9.30022	10.449	5.4802	10.0208	10.0995	9.03017	3	3	6			0.0694027	1.79774	-3.71238	0.652993	0.912474	-0.224032		-0.0839667						0.150702	3.73943	-7.31754	1.30678	1.84086	-0.459167			0.150702	3.73943	-7.31754	1.30678	1.84086	-0.459167		0.0871116		2.03863	0.802137	0.573499
Q0DJA0	11.433	5.7587	10.2977	10.2874	9.93926	11.3416	3	3	6			2.20215	-2.8926	1.10514	0.919518	0.752251	2.08737		0.695638						4.78177	-6.01684	2.17837	1.84016	1.51762	4.27819			4.78177	-6.01684	2.17837	1.84016	1.51762	4.27819		0.133865		2.23089	0.878377	0.543979
Q0DJC5	10.0949	11.7102	11.9072	13.6705	11.7601	12.0814	3	3	6			0.864057	3.05894	2.71465	4.3027	2.57309	2.82718		2.72344						1.87622	6.36283	5.35091	8.61064	5.19105	5.79448			1.87622	6.36283	5.35091	8.61064	5.19105	5.79448		0.751229		2.00207	1.69441	0.308981
Q0DJC7	8.38435	6.95012	8.26186	8.9241	9.97226	8.95178	3	3	6			-0.846461	-1.70119	-0.930717	-0.443748	0.785257	-0.302422		-0.573213						-1.83801	-3.5386	-1.83456	-0.888037	1.58421	-0.619833			-1.83801	-3.5386	-1.83456	-0.888037	1.58421	-0.619833		0.688438		2.42917	3.92264	0.0659426
Q0DJH7	8.2494	8.57225	10.12	7.25512	2.92556	10.0565	3	3	6			-0.981415	-0.0790616	0.927401	-2.11272	-6.26144	0.8023		-1.28416						-2.13106	-0.164454	1.82802	-4.22803	-12.6321	1.64436			-2.13106	-0.164454	1.82802	-4.22803	-12.6321	1.64436		0.141449		-4.91608	1.65991	0.31646
Q0DJS1	11.7148	11.6897	12.9309	12.6623	12.2613	12.5176	3	3	6			2.48399	3.03843	3.73834	3.29446	3.0743	3.26344		3.14883						5.39377	6.32016	7.36873	6.59295	6.2022	6.68862			5.39377	6.32016	7.36873	6.59295	6.2022	6.68862		0.127368		0.1337	0.265838	0.831715
Q0DJV6	9.76525	7.9431	10.5365	8.95806	6.87455	9.40633	3	3	6			0.53444	-0.708206	1.34396	-0.409788	-2.31245	0.15213		-0.233319						1.16049	-1.47312	2.64911	-0.820076	-4.66523	0.3118			1.16049	-1.47312	2.64911	-0.820076	-4.66523	0.3118		0.780651		-2.50333	1.92048	0.264166
Q0DK10	10.9756	9.4464	10.7343	11.24	10.3797	9.41219	3	3	6			1.74475	0.795094	1.54171	1.87217	1.1927	0.157986		1.2174						3.78857	1.65386	3.0389	3.74662	2.40619	0.323803			3.78857	1.65386	3.0389	3.74662	2.40619	0.323803		0.565564		-0.668235	0.736466	0.600208
Q0DK16	11.5863	6.83592	9.2738	8.94401	7.91313	4.55606	3	3	6			2.35546	-1.81538	0.0812184	-0.423839	-1.27388	-4.69814		-0.962426						5.11468	-3.77613	0.160091	-0.848194	-2.56996	-9.62912			5.11468	-3.77613	0.160091	-0.848194	-2.56996	-9.62912		0.956575		-4.84864	1.93063	0.262315
Q0DK35	4.62147	5.32391	7.69202	3.35403	2.01888	4.6251	3	3	6			-4.60935	-3.3274	-1.50055	-6.01382	-7.16812	-4.62911		-4.54139						-10.0088	-6.92124	-2.95777	-12.035	-14.4612	-9.48763			-10.0088	-6.92124	-2.95777	-12.035	-14.4612	-9.48763		0.662298		-5.36534	3.35173	0.0979553
Q0DKA5	10.4065	8.24892	9.41051	10.1982	9.17655	6.13974	3	3	6			1.17571	-0.402383	0.217938	0.830352	-0.0104578	-3.11447		-0.217218						2.55295	-0.836988	0.429582	1.66172	-0.021098	-6.38329			2.55295	-0.836988	0.429582	1.66172	-0.021098	-6.38329		0.280248		-2.29607	1.20477	0.433837
Q0DKM0	8.16022	8.38875	8.41773	8.07473	8.66455	9.4731	3	3	6			-1.07059	-0.262558	-0.774851	-1.29312	-0.522451	0.218895		-0.617445						-2.32469	-0.54614	-1.52733	-2.58781	-1.05401	0.448637			-2.32469	-0.54614	-1.52733	-2.58781	-1.05401	0.448637		0.512228		0.401656	0.488309	0.71286
Q0DKM4	12.3643	5.58991	9.72031	10.9012	8.45306	10.2233	3	3	6			3.13351	-3.06139	0.527735	1.53332	-0.73394	0.969075		0.394719						6.80415	-6.36793	1.04023	3.06851	-1.48068	1.98618			6.80415	-6.36793	1.04023	3.06851	-1.48068	1.98618		0.22935		0.699188	0.19864	0.871372
Q0DKY4	11.5645	9.57348	10.8697	10.938	10.9395	14.3221	3	3	6			2.33367	0.92217	1.67709	1.57019	1.7525	5.06794		2.22059						5.06736	1.91818	3.30575	3.14229	3.53556	10.387			5.06736	1.91818	3.30575	3.14229	3.53556	10.387		0.260996		2.25786	1.24699	0.421325
Q0DLB9	11.2236	11.1509	10.6436	9.55819	9.5345	11.6586	3	3	6			1.99277	2.49958	1.45101	0.190343	0.347492	2.40437		1.48093						4.32712	5.19932	2.86011	0.380919	0.701044	4.92789			4.32712	5.19932	2.86011	0.380919	0.701044	4.92789		0.356582		-2.12557	1.94995	0.258825
Q0DLG0	10.8114	8.69143	10.8947	9.47662	10.0861	11.1154	3	3	6			1.58056	0.0401224	1.70216	0.108777	0.899131	1.86117		1.03199						3.43205	0.0834576	3.35517	0.217686	1.81394	3.81457			3.43205	0.0834576	3.35517	0.217686	1.81394	3.81457		0.9412		-0.341495	0.263782	0.832902
Q0DM51	10.428	10.4913	14.3875	11.3514	10.9637	10.3778	3	3	6			1.19723	1.83994	5.19497	1.98359	1.77669	1.12355		2.186						2.59969	3.82722	10.2399	3.9696	3.58435	2.30278			2.59969	3.82722	10.2399	3.9696	3.58435	2.30278		0.086559		-2.27003	1.31597	0.401654
Q0DNU1	9.46132	5.63407	7.66505	7.70936	7.53683	8.10554	3	3	6			0.230503	-3.01724	-1.52753	-1.65849	-1.65017	-1.14866		-1.46193						0.500517	-6.27608	-3.01094	-3.319	-3.32912	-2.35425			0.500517	-6.27608	-3.01094	-3.319	-3.32912	-2.35425		0.0531457		-0.0719556	0.0397917	0.972795
Q0DQA9	5.37782	8.07484	9.4423	6.62896	7.52779	8.12588	3	3	6			-3.85299	-0.57647	0.249724	-2.73888	-1.65922	-1.12832		-1.61769						-8.36644	-1.1991	0.492235	-5.48111	-3.34736	-2.31257			-8.36644	-1.1991	0.492235	-5.48111	-3.34736	-2.31257		0.211138		-0.689244	0.282652	0.822078
Q0DR28	10.6903	10.0381	7.55926	7.21684	8.50736	9.75539	3	3	6			1.45945	1.38679	-1.63331	-2.15101	-0.679646	0.501186		-0.186091						3.16906	2.88463	-3.21946	-4.30463	-1.37114	1.02721			3.16906	2.88463	-3.21946	-4.30463	-1.37114	1.02721		0.707558		-2.49426	1.35694	0.39041
Q0DRX6	10.4284	9.71749	10.626	10.2695	9.78015	10.8748	3	3	6			1.19755	1.06618	1.43341	0.90163	0.593141	1.62055		1.13541						2.60037	2.21774	2.82542	1.80436	1.19662	3.32141			2.60037	2.21774	2.82542	1.80436	1.19662	3.32141		0.146114		-0.440376	0.89179	0.538945
Q0DS59	9.28972	9.92547	11.0824	9.06525	10.8697	9.4589	3	3	6			0.0589066	1.27416	1.88984	-0.302593	1.68267	0.204696		0.801279						0.127911	2.65035	3.7251	-0.605556	3.39467	0.419537			0.127911	2.65035	3.7251	-0.605556	3.39467	0.419537		0.882521		-1.09823	0.912213	0.531369
Q0DST9	7.05192	8.06388	9.08677	9.41456	7.77162	9.01734	3	3	6			-2.1789	-0.587427	-0.105804	0.0467105	-1.41538	-0.236865		-0.746278						-4.73128	-1.22189	-0.208553	0.093478	-2.85545	-0.485469			-4.73128	-1.22189	-0.208553	0.093478	-2.85545	-0.485469		0.604721		0.97143	0.771987	0.58561
Q0DSV9	10.6683	9.38176	8.88524	10.6941	11.3005	8.22959	3	3	6			1.43745	0.730452	-0.307338	1.32625	2.11346	-1.02461		0.71261						3.1213	1.5194	-0.605801	2.65411	4.26377	-2.10001			3.1213	1.5194	-0.605801	2.65411	4.26377	-2.10001		0.484025		0.260995	0.134393	0.911053
Q0DUI8	9.73963	9.12239	8.37474	8.92478	9.16463	9.09685	3	3	6			0.508816	0.471081	-0.817842	-0.443065	-0.0223746	-0.157355		-0.07679						1.10485	0.979884	-1.61207	-0.88667	-0.0451393	-0.322509			1.10485	0.979884	-1.61207	-0.88667	-0.0451393	-0.322509		0.145003		-0.575662	0.823094	0.565229
Q0DV28	11.5587	9.11061	10.5063	11.5246	11.2706	11.3549	3	3	6			2.3279	0.459307	1.31373	2.15674	2.08358	2.10065		1.74032						5.05482	0.955393	2.58952	4.31612	4.20349	4.30541			5.05482	0.955393	2.58952	4.31612	4.20349	4.30541		0.00181307		1.40843	1.47932	0.358657
Q0DV32	11.3294	8.16476	9.92769	11.2901	10.6928	8.53103	3	3	6			2.09859	-0.486551	0.735112	1.92229	1.50578	-0.723172		0.842009						4.55691	-1.01206	1.44899	3.84692	3.03782	-1.48218			4.55691	-1.01206	1.44899	3.84692	3.03782	-1.48218		0.971365		0.136239	0.0651649	0.955836
Q0DVU4	10.0246	9.45171	9.42526	3.2379	8.41337	8.82349	3	3	6			0.793773	0.800399	0.232681	-6.12995	-0.773631	-0.430708		-0.917906						1.72361	1.66489	0.458642	-12.2674	-1.56075	-0.882761			1.72361	1.66489	0.458642	-12.2674	-1.56075	-0.882761		0.0246903		-6.18601	2.09329	0.234346
Q0DVX2	10.4676	9.7662	10.3213	10.0149	10.6284	10.4516	3	3	6			1.23679	1.11489	1.12867	0.64701	1.44135	1.19742		1.12769						2.68559	2.31906	2.22475	1.29481	2.90783	2.45419			2.68559	2.31906	2.22475	1.29481	2.90783	2.45419		0.157787		-0.190858	0.469334	0.722298
Q0DWF2	9.9928	10.2402	8.43271	9.77553	9.24881	8.43313	3	3	6			0.761984	1.58889	-0.759868	0.40768	0.0618002	-0.821076		0.206568						1.65458	3.30501	-1.49779	0.815857	0.124678	-1.68284			1.65458	3.30501	-1.49779	0.815857	0.124678	-1.68284		0.436969		-1.40137	1.22136	0.428877
Q0DWH7	9.40088	8.86885	9.393	8.87636	7.8916	5.74408	3	3	6			0.170067	0.217546	0.200427	-0.491484	-1.2954	-3.51012		-0.784828						0.369285	0.452513	0.395066	-0.983568	-2.61339	-7.19421			0.369285	0.452513	0.395066	-0.983568	-2.61339	-7.19421		0.000350084		-4.00268	2.60683	0.16416
Q0DWQ1	9.026	9.26409	9.35368	9.22668	10.7505	8.68236	3	3	6			-0.204815	0.612784	0.161099	-0.141171	1.56345	-0.57184		0.236585						-0.444737	1.27464	0.317546	-0.282514	3.15416	-1.17202			-0.444737	1.27464	0.317546	-0.282514	3.15416	-1.17202		0.248991		0.184061	0.148127	0.902421
Q0DWQ7	10.2946	3.54275	8.41071	10.4613	7.98459	9.16466	3	3	6			1.06381	-5.10855	-0.781871	1.09343	-1.20242	-0.0895468		-0.837525						2.30997	-10.6262	-1.54116	2.18819	-2.4258	-0.183532			2.30997	-10.6262	-1.54116	2.18819	-2.4258	-0.183532		0.215346		3.14541	1.05376	0.481711
Q0DWT8	9.99095	8.08651	10.2783	9.70801	10.855	7.47662	3	3	6			0.760142	-0.564799	1.08576	0.340167	1.66802	-1.77758		0.251951						1.65058	-1.17483	2.14016	0.680749	3.36512	-3.64325			1.65058	-1.17483	2.14016	0.680749	3.36512	-3.64325		0.407754		-0.737765	0.389743	0.763266
Q0DX67	9.24674	6.75862	10.2718	9.65483	7.8751	8.29893	3	3	6			0.015928	-1.89268	1.07924	0.286985	-1.3119	-0.955269		-0.462951						0.0345863	-3.93693	2.1273	0.57432	-2.64668	-1.95788			0.0345863	-3.93693	2.1273	0.57432	-2.64668	-1.95788		0.465336		-0.751734	0.454138	0.729946
Q0DXB1	9.68685	10.2765	3.19033	8.6431	7.69585	10.2438	3	3	6			0.456038	1.62517	-6.00225	-0.724749	-1.49115	0.989567		-0.857896						0.990246	3.38047	-11.8312	-1.45038	-3.0083	2.02818			0.990246	3.38047	-11.8312	-1.45038	-3.0083	2.02818		0.180764		1.67664	0.411292	0.75195
Q0DXS3	10.5863	9.12673	8.20212	7.06953	9.89542	8.62062	3	3	6			1.35546	0.475423	-0.990453	-2.29832	0.708419	-0.633579		-0.230507						2.94327	0.988916	-1.9523	-4.59944	1.42919	-1.29856			2.94327	0.988916	-1.9523	-4.59944	1.42919	-1.29856		0.799777		-2.14956	1.34564	0.393478
Q0DXZ1	9.20271	9.981	10.8921	9.38094	9.62976	8.44799	3	3	6			-0.028101	1.32969	1.69951	0.0130893	0.442752	-0.80621		0.441788						-0.0610189	2.76585	3.34994	0.0261946	0.893224	-1.65238			-0.0610189	2.76585	3.34994	0.0261946	0.893224	-1.65238		0.669594		-2.26258	2.69306	0.154636
Q0DY59	9.88293	9.34381	7.67476	7.7701	4.02733	7.60526	3	3	6			0.652121	0.6925	-1.51782	-1.59775	-5.15967	-1.64895		-1.42993						1.41602	1.44045	-2.99181	-3.19744	-10.4093	-3.37961			1.41602	1.44045	-2.99181	-3.19744	-10.4093	-3.37961		0.55608		-5.61701	3.12322	0.114767
Q0DY81	13.214	10.8113	11.9997	12.6134	15.459	11.9113	3	3	6			3.9832	2.15999	2.80714	3.24557	6.27204	2.65708		3.52084						8.64917	4.49294	5.53321	6.4951	12.6534	5.44584			8.64917	4.49294	5.53321	6.4951	12.6534	5.44584		0.471528		1.97302	1.04177	0.485732
Q0DYB1	9.43979	8.3647	7.81564	6.88448	7.85991	7.83023	3	3	6			0.208977	-0.286603	-1.37694	-2.48337	-1.3271	-1.42397		-1.11483						0.453775	-0.596157	-2.71411	-4.96977	-2.67733	-2.91852			0.453775	-0.596157	-2.71411	-4.96977	-2.67733	-2.91852		0.757305		-2.56971	3.39044	0.0953621
Q0DYK7	5.52698	7.73281	8.96327	11.49	8.82311	11.0149	3	3	6			-3.70384	-0.918495	-0.229305	2.12215	-0.363893	1.76072		-0.222109						-8.04255	-1.91054	-0.451989	4.24689	-0.73413	3.60871			-8.04255	-1.91054	-0.451989	4.24689	-0.73413	3.60871		0.623348		5.84218	3.24449	0.105514
Q0DZE0	10.3675	11.2396	7.92452	4.17233	12.4055	10.6344	3	3	6			1.13671	2.58829	-1.26806	-5.19552	3.21848	1.38025		0.310025						2.46827	5.38384	-2.4995	-10.3974	6.49308	2.8289			2.46827	5.38384	-2.4995	-10.3974	6.49308	2.8289		0.335082		-2.14267	0.468926	0.722502
Q0DZT4	9.62965	10.1674	9.97154	7.75161	9.37053	9.11155	3	3	6			0.398835	1.51611	0.778966	-1.61624	0.18353	-0.142649		0.186426						0.866036	3.15363	1.53544	-3.23444	0.37026	-0.292368			0.866036	3.15363	1.53544	-3.23444	0.37026	-0.292368		0.54624		-2.90388	3.48805	0.0891233
Q0E079	11.2345	11.7759	7.67737	10.2159	15.1123	5.01863	3	3	6			2.00365	3.12463	-1.51521	0.848049	5.92531	-4.23557		1.02514						4.35074	6.49947	-2.98666	1.69713	11.9539	-8.68105			4.35074	6.49947	-2.98666	1.69713	11.9539	-8.68105		0.37716		-0.964511	0.166353	0.891093
Q0E088	10.4689	10.8264	10.5139	9.55057	10.6788	10.6528	3	3	6			1.23812	2.17508	1.32135	0.182726	1.49177	1.39855		1.30127						2.68846	4.52434	2.60454	0.365674	3.00955	2.86642			2.68846	4.52434	2.60454	0.365674	3.00955	2.86642		0.694935		-1.1919	1.62231	0.324816
Q0E0I1	7.0936	7.66199	7.76964	8.92748	7.84059	6.98436	3	3	6			-2.13721	-0.989315	-1.42294	-0.440366	-1.34642	-2.26984		-1.43435						-4.64076	-2.05785	-2.80478	-0.881269	-2.71631	-4.65217			-4.64076	-2.05785	-2.80478	-0.881269	-2.71631	-4.65217		0.663862		0.417882	0.378184	0.769405
Q0E0P0	9.62405	8.44564	10.4033	9.58491	10.2974	10.0618	3	3	6			0.393233	-0.205671	1.21075	0.217058	1.11037	0.807574		0.588886						0.853872	-0.427812	2.38654	0.434381	2.2401	1.65517			0.853872	-0.427812	2.38654	0.434381	2.2401	1.65517		0.598994		0.505683	0.665774	0.630351
Q0E0Q3	9.82523	10.3281	10.6922	11.1485	12.3511	10.495	3	3	6			0.594417	1.67681	1.4996	1.78063	3.1641	1.24075		1.65938						1.29072	3.48789	2.9559	3.56343	6.38337	2.543			1.29072	3.48789	2.9559	3.56343	6.38337	2.543		0.498549		1.5851	1.74759	0.297799
Q0E0Y3	8.90992	9.03738	8.72189	10.1056	7.64342	8.9292	3	3	6			-0.32089	0.386075	-0.470692	0.737799	-1.54358	-0.325003		-0.256049						-0.696783	0.803066	-0.927791	1.4765	-3.11408	-0.666113			-0.696783	0.803066	-0.927791	1.4765	-3.11408	-0.666113		0.286766		-0.494062	0.419651	0.747605
Q0E1I7	7.96319	8.43434	9.91181	10.1924	10.2259	12.6662	3	3	6			-1.26763	-0.216971	0.719234	0.824568	1.03893	3.412		0.751688						-2.75254	-0.451316	1.4177	1.65014	2.09597	6.9931			-2.75254	-0.451316	1.4177	1.65014	2.09597	6.9931		0.663555		4.17512	3.09663	0.116902
Q0E1Z0	9.2723	8.65231	7.85985	9.68863	8.78021	7.62015	3	3	6			0.0414906	0.00100012	-1.33273	0.320787	-0.406793	-1.63406		-0.501717						0.0900932	0.00208032	-2.62698	0.641965	-0.820679	-3.3491			0.0900932	0.00208032	-2.62698	0.641965	-0.820679	-3.3491		0.737929		-0.331002	0.264303	0.832601
Q0E2F9	10.5021	11.419	9.5434	11.7739	7.68979	12.0006	3	3	6			1.27132	2.76771	0.350822	2.40603	-1.49722	2.74643		1.34085						2.76057	5.75704	0.691513	4.815	-3.02054	5.62898			2.76057	5.75704	0.691513	4.815	-3.02054	5.62898		0.44279		-0.595226	0.220582	0.858219
Q0E2L3	11.9269	11.938	12.3766	12.1885	11.5309	11.5686	3	3	6			2.69604	3.28669	3.18401	2.82065	2.34389	2.31442		2.77428						5.85421	6.83657	6.27607	5.64474	4.72865	4.74354			5.85421	6.83657	6.27607	5.64474	4.72865	4.74354		0.937452		-1.28331	4.7702	0.036646
Q0E2Q3	6.30031	8.95367	8.5705	9.99506	8.84226	11.5266	3	3	6			-2.93051	0.302366	-0.622076	0.627213	-0.344749	2.27239		-0.115893						-6.36333	0.628943	-1.22619	1.25519	-0.695509	4.65741			-6.36333	0.628943	-1.22619	1.25519	-0.695509	4.65741		0.717413		4.05922	2.35797	0.195066
Q0E2Y1	10.178	10.9559	9.21636	11.9236	12.0795	10.0076	3	3	6			0.94723	2.30456	0.0237806	2.55578	2.89245	0.753386		1.57953						2.05683	4.79366	0.0468745	5.11467	5.83532	1.54411			2.05683	4.79366	0.0468745	5.11467	5.83532	1.54411		0.963809		1.86558	1.37984	0.38426
Q0E2Z7	11.1629	8.48929	9.74974	10.1741	10.1393	9.56847	3	3	6			1.93208	-0.162021	0.557158	0.806204	0.952291	0.314267		0.73333						4.19535	-0.337016	1.09823	1.61339	1.92118	0.644109			4.19535	-0.337016	1.09823	1.61339	1.92118	0.644109		0.152909		-0.259291	0.215478	0.861261
Q0E3C8	12.6644	14.9916	9.7489	10.7387	11.3808	11.8122	3	3	6			3.43357	6.34026	0.55632	1.37084	2.19383	2.55802		2.74214						7.45569	13.1882	1.09657	2.74334	4.42592	5.2428			7.45569	13.1882	1.09657	2.74334	4.42592	5.2428		0.0850209		-3.10947	1.20834	0.432766
Q0E3F8	13.1973	5.11074	9.20989	7.50732	9.81282	5.36135	3	3	6			3.96647	-3.54057	0.0173147	-1.86053	0.625814	-3.89286		-0.780726						8.61283	-7.36465	0.0341295	-3.72333	1.26254	-7.97864			8.61283	-7.36465	0.0341295	-3.72333	1.26254	-7.97864		0.501447		-3.90725	0.987341	0.504407
Q0E3L5	9.19185	7.23496	7.9855	8.70041	9.04212	8.2948	3	3	6			-0.0389637	-1.41635	-1.20708	-0.667443	-0.144881	-0.959398		-0.739018						-0.0846063	-2.94611	-2.37929	-1.3357	-0.292287	-1.96634			-0.0846063	-2.94611	-2.37929	-1.3357	-0.292287	-1.96634		0.474856		0.605226	0.790027	0.578333
Q0E3V2	6.85437	9.78024	8.90069	8.88625	6.31662	7.81519	3	3	6			-2.37644	1.12894	-0.291892	-0.481603	-2.87039	-1.43901		-1.05507						-5.16024	2.34828	-0.575353	-0.963792	-5.79082	-2.94934			-5.16024	2.34828	-0.575353	-0.963792	-5.79082	-2.94934		0.58248		-2.10555	1.11169	0.462751
Q0E3X4	9.00767	7.46132	10.8541	11.5425	11.3978	10.4696	3	3	6			-0.223141	-1.18999	1.66151	2.1747	2.21083	1.21544		0.974892						-0.48453	-2.47527	3.27504	4.35205	4.46021	2.49112			-0.48453	-2.47527	3.27504	4.35205	4.46021	2.49112		0.251287		3.66271	3.15805	0.11203
Q0E459	9.1724	2.72039	9.49313	10.7025	9.89514	12.197	3	3	6			-0.0584101	-5.93092	0.300558	1.33467	0.708131	2.9428		-0.117195						-0.126832	-12.3368	0.592436	2.67097	1.42861	6.03144			-0.126832	-12.3368	0.592436	2.67097	1.42861	6.03144		0.193978		7.33406	2.53968	0.17198
Q0E474	9.24648	6.84887	6.52325	5.54532	10.6889	6.49927	3	3	6			0.0156668	-1.80243	-2.66933	-3.82253	1.50186	-2.75493		-1.58862						0.034019	-3.7492	-5.26157	-7.64972	3.0299	-5.64639			0.034019	-3.7492	-5.26157	-7.64972	3.0299	-5.64639		0.375171		-0.42982	0.133525	0.911602
Q0E4J6	10.0345	9.86553	10.4035	7.69007	10.1118	9.41104	3	3	6			0.803711	1.21423	1.21097	-1.67778	0.924783	0.156842		0.438792						1.74519	2.52568	2.38696	-3.35761	1.86569	0.321458			1.74519	2.52568	2.38696	-3.35761	1.86569	0.321458		0.0470257		-2.60943	2.1064	0.232226
Q0ILZ4	8.65335	10.756	10.2233	9.86828	9.97885	11.1101	3	3	6			-0.577466	2.10467	1.0307	0.500435	0.791848	1.85589		0.951012						-1.25392	4.37786	2.03164	1.00148	1.5975	3.80376			-1.25392	4.37786	2.03164	1.00148	1.5975	3.80376		0.42806		0.415719	0.264424	0.832531
Q0IMG5	9.0786	6.6174	8.26529	6.76898	7.91055	8.20706	3	3	6			-0.152208	-2.03391	-0.92729	-2.59887	-1.27645	-1.04714		-1.33931						-0.330506	-4.23068	-1.8278	-5.20091	-2.57516	-2.14617			-0.330506	-4.23068	-1.8278	-5.20091	-2.57516	-2.14617		0.828012		-1.17775	1.08372	0.471812
Q0IMG9	10.1602	9.85055	10.2685	9.02495	11.4031	12.0879	3	3	6			0.929437	1.19924	1.07596	-0.342902	2.21611	2.83366		1.31859						2.01819	2.49451	2.12086	-0.686222	4.47087	5.80775			2.01819	2.49451	2.12086	-0.686222	4.47087	5.80775		0.0106309		0.98628	0.581902	0.668082
Q0IMS9	10.4618	8.19854	9.87684	10.4338	12.3386	12.8691	3	3	6			1.23097	-0.452764	0.684262	1.06595	3.15156	3.61489		1.54915						2.67295	-0.941783	1.34876	2.13319	6.35808	7.40893			2.67295	-0.941783	1.34876	2.13319	6.35808	7.40893		0.600306		4.27342	3.46002	0.090872
Q0IMV4	13.2005	9.35202	7.59485	12.7639	8.318	9.51879	3	3	6			3.96972	0.700714	-1.59773	3.39601	-0.869005	0.264588		0.977382						8.61989	1.45754	-3.14932	6.79616	-1.75316	0.54229			8.61989	1.45754	-3.14932	6.79616	-1.75316	0.54229		0.715178		-0.447609	0.117792	0.921597
Q0INC5	11.8534	11.5581	10.799	9.86887	10.2912	11.6814	3	3	6			2.62257	2.90678	1.60646	0.501021	1.10417	2.42721		1.86137						5.69469	6.04632	3.16653	1.00265	2.22758	4.97472			5.69469	6.04632	3.16653	1.00265	2.22758	4.97472		0.74728		-2.2342	2.27501	0.206611
Q0ING3	11.0611	7.69153	7.10297	7.63365	11.1423	8.93	3	3	6			1.83029	-0.959773	-2.0896	-1.7342	1.95529	-0.324204		-0.220366						3.97431	-1.9964	-4.11886	-3.47051	3.94468	-0.664476			3.97431	-1.9964	-4.11886	-3.47051	3.94468	-0.664476		0.886431		0.650215	0.23269	0.851047
Q0INM3	10.2234	7.91403	6.73037	9.99718	9.67576	11.9688	3	3	6			0.992586	-0.737281	-2.46221	0.629332	0.488758	2.71461		0.270966						2.15531	-1.5336	-4.85331	1.25943	0.986038	5.56375			2.15531	-1.5336	-4.85331	1.25943	0.986038	5.56375		0.698235		4.01361	2.4351	0.184911
Q0INT0	10.6973	7.12143	9.03741	9.07655	11.65	7.11051	3	3	6			1.4665	-1.52988	-0.155168	-0.291299	2.46301	-2.14369		-0.0317533						3.18438	-3.18226	-0.305854	-0.582954	4.96897	-4.39363			3.18438	-3.18226	-0.305854	-0.582954	4.96897	-4.39363		0.628781		0.0987087	0.0328999	0.977454
Q0INW1	9.28242	5.70044	11.287	9.80782	10.8441	11.181	3	3	6			0.0516041	-2.95087	2.09438	0.439974	1.65707	1.92676		0.536489						0.112054	-6.13803	4.12829	0.880484	3.34304	3.94902			0.112054	-6.13803	4.12829	0.880484	3.34304	3.94902		0.179636		3.35674	1.5394	0.344029
Q0INZ4	9.28633	7.9404	10.3718	9.04125	9.21468	8.64735	3	3	6			0.0555141	-0.710905	1.1792	-0.326599	0.0276784	-0.606852		-0.0636608						0.120544	-1.47874	2.32434	-0.653597	0.0558394	-1.24378			0.120544	-1.47874	2.32434	-0.653597	0.0558394	-1.24378		0.20809		-0.935896	1.09943	0.466701
Q0IP69	11.2466	10.3151	8.80958	9.62187	10.724	9.42486	3	3	6			2.01581	1.66384	-0.383002	0.254021	1.537	0.170657		0.876387						4.37715	3.46092	-0.754943	0.508351	3.10079	0.349771			4.37715	3.46092	-0.754943	0.508351	3.10079	0.349771		0.483048		-1.0414	0.744807	0.596748
Q0IQF7	11.7489	11.5162	12.1566	12.031	12.2111	11.2223	3	3	6			2.51805	2.86489	2.96404	2.66316	3.02406	1.96805		2.66704						5.46773	5.95918	5.84249	5.32957	6.10085	4.03363			5.46773	5.95918	5.84249	5.32957	6.10085	4.03363		0.113949		-0.601778	1.36791	0.387451
Q0IQU1	13.1245	12.1676	12.7702	12.5091	8.69512	12.67	3	3	6			3.89373	3.51633	3.57759	3.14121	-0.491881	3.41581		2.84213						8.45489	7.31423	7.05187	6.28625	-0.992339	7.00091			8.45489	7.31423	7.05187	6.28625	-0.992339	7.00091		0.0553087		-3.50872	2.01785	0.246926
Q0ITS8	10.9349	9.79794	10.6787	9.81139	9.83712	12.1467	3	3	6			1.70413	1.14663	1.48611	0.443543	0.650118	2.89249		1.38717						3.70037	2.38508	2.9293	0.887627	1.31157	5.92834			3.70037	2.38508	2.9293	0.887627	1.31157	5.92834		0.105837		-0.295739	0.205634	0.867158
Q0IUU4	9.26515	8.72154	5.85405	10.9766	10.6579	11.1228	3	3	6			0.0343336	0.0702364	-3.33853	1.60879	1.47094	1.86863		0.285732						0.0745524	0.146097	-6.58065	3.21954	2.96752	3.82986			0.0745524	0.146097	-6.58065	3.21954	2.96752	3.82986		0.0260043		5.45897	2.9174	0.132366
Q0IV63	9.03697	7.4465	8.26026	10.5846	8.77495	7.79045	3	3	6			-0.193842	-1.2048	-0.932316	1.21674	-0.412053	-1.46376		-0.498339						-0.420911	-2.50608	-1.83771	2.43496	-0.831291	-3.00006			-0.420911	-2.50608	-1.83771	2.43496	-0.831291	-3.00006		0.263064		1.12277	0.878515	0.543927
Q0IWM5	8.32012	2.60376	8.545	10.1599	9.18083	9.32623	3	3	6			-0.910689	-6.04754	-0.647574	0.792023	-0.00617587	0.0720248		-1.12466						-1.97748	-12.5794	-1.27645	1.58501	-0.0124594	0.147619			-1.97748	-12.5794	-1.27645	1.58501	-0.0124594	0.147619		0.0378624		5.85115	2.00412	0.249287
Q0IY07	12.0113	9.84073	9.43434	8.19618	12.3961	9.82461	3	3	6			2.78052	1.18942	0.241759	-1.17166	3.20909	0.570406		1.13659						6.03765	2.47409	0.476536	-2.34476	6.47414	1.16908			6.03765	2.47409	0.476536	-2.34476	6.47414	1.16908		0.574097		-1.22994	0.502067	0.706094
Q0IZQ2	10.3795	8.90515	11.5013	9.50714	11.3357	8.89336	3	3	6			1.14867	0.253839	2.30871	0.139293	2.14872	-0.36084		0.939733						2.49424	0.528005	4.55075	0.278755	4.3349	-0.739564			2.49424	0.528005	4.55075	0.278755	4.3349	-0.739564		0.719158		-1.23297	0.83913	0.55898
Q0IZS0	10.652	8.92244	9.01288	8.89899	8.85415	10.4111	3	3	6			1.42123	0.271129	-0.179701	-0.468854	-0.332853	1.15688		0.311305						3.08607	0.563968	-0.354213	-0.938279	-0.67151	2.3711			3.08607	0.563968	-0.354213	-0.938279	-0.67151	2.3711		0.968435		-0.844835	0.741365	0.598173
Q0IZZ8	11.9791	8.45972	10.9454	9.35762	6.71946	10.0137	3	3	6			2.74829	-0.191589	1.75287	-0.0102299	-2.46755	0.759539		0.431888						5.96767	-0.398519	3.45511	-0.0204722	-4.97812	1.55672			5.96767	-0.398519	3.45511	-0.0204722	-4.97812	1.55672		0.938552		-4.15538	2.32943	0.198962
Q0J035	12.9697	7.9273	9.46608	9.58163	8.94436	9.97513	3	3	6			3.73888	-0.724003	0.273499	0.213786	-0.242644	0.720929		0.663408						8.11865	-1.50598	0.5391	0.427832	-0.489519	1.47759			8.11865	-1.50598	0.5391	0.427832	-0.489519	1.47759		0.0726273		-1.91196	0.845997	0.556326
Q0J0A4	8.36216	8.62542	8.78061	9.15972	6.18606	5.05693	3	3	6			-0.86865	-0.0258905	-0.411972	-0.208128	-3.00094	-4.19727		-1.45214						-1.8862	-0.0538542	-0.812046	-0.416509	-6.0542	-8.60256			-1.8862	-0.0538542	-0.812046	-0.416509	-6.0542	-8.60256		0.0921607		-4.10706	2.53497	0.172544
Q0J0G1	7.72629	9.33356	7.78699	8.98695	9.16073	8.09924	3	3	6			-1.50453	0.682251	-1.40559	-0.380897	-0.0262764	-1.15496		-0.631666						-3.26695	1.41913	-2.77059	-0.762258	-0.0530109	-2.36716			-3.26695	1.41913	-2.77059	-0.762258	-0.0530109	-2.36716		0.350007		0.478657	0.350284	0.78443
Q0J0K1	8.42173	7.8614	8.37382	8.59014	10.7657	11.6357	3	3	6			-0.809084	-0.78991	-0.818755	-0.77771	1.5787	2.38152		0.127459						-1.75686	-1.64307	-1.61387	-1.55637	3.18492	4.88106			-1.75686	-1.64307	-1.61387	-1.55637	3.18492	4.88106		0.00102484		3.84113	2.44013	0.184267
Q0J0S6	11.3291	9.6218	10.9402	11.7544	11.8304	11.7538	3	3	6			2.09825	0.970488	1.74766	2.38658	2.64339	2.49964		2.05767						4.55618	2.01869	3.44486	4.77607	5.33287	5.12316			4.55618	2.01869	3.44486	4.77607	5.33287	5.12316		0.0931969		1.73746	3.60781	0.0820243
Q0J185	10.7914	8.29719	9.89844	9.47834	12.9038	9.70527	3	3	6			1.56059	-0.354116	0.705858	0.110497	3.71675	0.451067		1.03177						3.38869	-0.736588	1.39133	0.221129	7.49829	0.924489			3.38869	-0.736588	1.39133	0.221129	7.49829	0.924489		0.417921		1.53349	0.766613	0.587796
Q0J235	8.34992	10.2882	8.92532	6.75582	10.1329	10.1872	3	3	6			-0.88089	1.63687	-0.26726	-2.61203	0.94588	0.933026		-0.0407338						-1.91278	3.40481	-0.526802	-5.22724	1.90825	1.91229			-1.91278	3.40481	-0.526802	-5.22724	1.90825	1.91229		0.618872		-0.79064	0.328963	0.796109
Q0J290	4.50029	6.30573	5.72925	8.21364	7.02181	7.50295	3	3	6			-4.73052	-2.34557	-3.46332	-1.15421	-2.16519	-1.75125		-2.60168						-10.2719	-4.87897	-6.82663	-2.30983	-4.36814	-3.58929			-10.2719	-4.87897	-6.82663	-2.30983	-4.36814	-3.58929		0.253001		3.90342	3.61372	0.0816885
Q0J2B5	9.99421	8.16591	10.4879	8.53644	11.5583	11.1146	3	3	6			0.763399	-0.485395	1.29536	-0.831406	2.37127	1.86039		0.828937						1.65765	-1.00966	2.55332	-1.66383	4.78389	3.81297			1.65765	-1.00966	2.55332	-1.66383	4.78389	3.81297		0.442676		1.24391	0.704782	0.613535
Q0J2R1	9.5107	6.00708	7.18606	12.0996	7.01246	8.71294	3	3	6			0.279892	-2.64422	-2.00651	2.73176	-2.17455	-0.541263		-0.725815						0.607761	-5.50019	-3.95508	5.46686	-4.38701	-1.10935			0.607761	-5.50019	-3.95508	5.46686	-4.38701	-1.10935		0.571959		2.93933	1.18569	0.439614
Q0J3H7	11.3491	6.27059	8.51479	7.87535	3.7914	9.42687	3	3	6			2.11825	-2.38072	-0.677784	-1.4925	-5.39561	0.17267		-1.27595						4.59959	-4.95208	-1.33599	-2.98682	-10.8853	0.353898			4.59959	-4.95208	-1.33599	-2.98682	-10.8853	0.353898		0.822267		-3.94324	1.26814	0.415194
Q0J3L4	10.8679	6.88056	8.37021	8.02536	8.82404	7.40616	3	3	6			1.63708	-1.77074	-0.822369	-1.34249	-0.362969	-1.84804		-0.751588						3.55478	-3.68328	-1.62099	-2.68661	-0.732267	-3.78767			3.55478	-3.68328	-1.62099	-2.68661	-0.732267	-3.78767		0.293814		-1.81902	1.06261	0.478765
Q0J466	12.149	8.41473	9.30415	10.738	10.6804	10.1297	3	3	6			2.91817	-0.23658	0.111569	1.37016	1.49335	0.875467		1.08869						6.33655	-0.492104	0.219915	2.74199	3.01275	1.79432			6.33655	-0.492104	0.219915	2.74199	3.01275	1.79432		0.0564541		0.494898	0.263726	0.832934
Q0J4D4	13.5158	11.987	12.483	12.2364	9.92876	12.4115	3	3	6			4.28501	3.33567	3.29046	2.86858	0.74175	3.15731		2.94646						9.30452	6.93845	6.48589	5.74067	1.49643	6.47109			9.30452	6.93845	6.48589	5.74067	1.49643	6.47109		0.482023		-3.00689	2.58668	0.166468
Q0J4I1	7.14119	9.33764	9.15155	9.73252	8.4441	6.17341	3	3	6			-2.08963	0.686337	-0.0410278	0.364676	-0.742901	-3.0808		-0.817223						-4.53744	1.42763	-0.0808708	0.729796	-1.49876	-6.31427			-4.53744	1.42763	-0.0808708	0.729796	-1.49876	-6.31427		0.851978		-1.29752	0.597456	0.660918
Q0J5V5	10.2842	10.0478	10.8003	11.3215	10.9017	10.8315	3	3	6			1.05343	1.3965	1.60768	1.95369	1.71469	1.57734		1.55055						2.28744	2.90482	3.16892	3.90975	3.45928	3.23286			2.28744	2.90482	3.16892	3.90975	3.45928	3.23286		0.734295		0.746903	3.55192	0.0852641
Q0J649	6.79351	6.32945	10.3944	7.29094	9.04412	9.88036	3	3	6			-2.43731	-2.32186	1.20178	-2.07691	-0.142884	0.626162		-0.858503						-5.2924	-4.82965	2.36885	-4.15635	-0.28826	1.28336			-5.2924	-4.82965	2.36885	-4.15635	-0.28826	1.28336		0.596165		1.53065	0.66109	0.6324
Q0J6H8	9.89721	6.80941	11.0419	10.8792	10.4055	7.87995	3	3	6			0.666398	-1.84189	1.84936	1.51135	1.21846	-1.37425		0.338236						1.44702	-3.83128	3.6453	3.02455	2.45816	-2.81661			1.44702	-3.83128	3.6453	3.02455	2.45816	-2.81661		0.825468		0.468347	0.185536	0.879322
Q0J6N4	9.94156	6.48927	9.98114	9.569	6.66206	8.83719	3	3	6			0.710749	-2.16204	0.788562	0.201153	-2.52494	-0.417016		-0.567255						1.54333	-4.4972	1.55435	0.402552	-5.09391	-0.854699			1.54333	-4.4972	1.55435	0.402552	-5.09391	-0.854699		0.809991		-1.38218	0.678566	0.624786
Q0J6P7	11.3555	9.52671	11.6272	9.86745	12.1301	12.8006	3	3	6			2.12465	0.875407	2.43459	0.499601	2.94305	3.54637		2.07061						4.61349	1.82091	4.79888	0.999811	5.93742	7.26851			4.61349	1.82091	4.79888	0.999811	5.93742	7.26851		0.406603		0.990819	0.58444	0.666908
Q0J705	8.84978	8.17777	6.96128	9.47776	5.38457	9.04267	3	3	6			-0.381032	-0.473539	-2.2313	0.10991	-3.80244	-0.211531		-1.16499						-0.827378	-0.984997	-4.39816	0.219955	-7.67117	-0.433545			-0.827378	-0.984997	-4.39816	0.219955	-7.67117	-0.433545		0.350167		-0.558074	0.232941	0.850899
Q0J709	7.91654	8.90494	8.81461	8.72065	8.76633	8.77883	3	3	6			-1.31428	0.253629	-0.377963	-0.647193	-0.420675	-0.47537		-0.496975						-2.85383	0.527567	-0.74501	-1.29518	-0.848684	-0.974298			-2.85383	0.527567	-0.74501	-1.29518	-0.848684	-0.974298		0.0357038		-0.0156266	0.0161758	0.98885
Q0J716	11.8692	10.1433	9.69521	11.3032	9.52068	11.9816	3	3	6			2.6384	1.49195	0.502634	1.93536	0.333673	2.7274		1.6049						5.72904	3.10337	0.990752	3.87308	0.673163	5.58997			5.72904	3.10337	0.990752	3.87308	0.673163	5.58997		0.950071		0.104352	0.0578972	0.960663
Q0J7J7	11.7042	7.77762	7.43904	8.30044	8.97436	11.4651	3	3	6			2.47344	-0.87369	-1.75354	-1.0674	-0.212648	2.2109		0.129511						5.37085	-1.81734	-3.45643	-2.13611	-0.429003	4.53138			5.37085	-1.81734	-3.45643	-2.13611	-0.429003	4.53138		0.704765		0.623064	0.213809	0.862258
Q0J7N5	9.60129	9.9456	9.4766	8.93646	9.42021	9.00439	3	3	6			0.370475	1.2943	0.284027	-0.431387	0.233208	-0.249813		0.250135						0.804455	2.69224	0.559852	-0.863299	0.470482	-0.512007			0.804455	2.69224	0.559852	-0.863299	0.470482	-0.512007		0.519585		-1.65379	3.28947	0.102275
Q0J7P4	10.337	7.05842	8.38944	10.6595	6.03073	10.3086	3	3	6			1.10614	-1.59288	-0.803139	1.2917	-3.15627	1.05436		-0.350014						2.40189	-3.31332	-1.58309	2.58498	-6.36758	2.16098			2.40189	-3.31332	-1.58309	2.58498	-6.36758	2.16098		0.503782		0.290967	0.0963864	0.935373
Q0J7T6	11.5197	6.61337	11.22	10.5732	12.229	11.319	3	3	6			2.28892	-2.03794	2.02738	1.20533	3.04202	2.06479		1.43175						4.97019	-4.23906	3.99621	2.41212	6.13709	4.23192			4.97019	-4.23906	3.99621	2.41212	6.13709	4.23192		0.23873		2.6846	1.19408	0.437065
Q0J7U6	9.73804	7.7389	10.4251	8.77571	11.4911	10.5153	3	3	6			0.507229	-0.912404	1.23253	-0.592139	2.3041	1.2611		0.633403						1.1014	-1.89787	2.42947	-1.185	4.64837	2.58471			1.1014	-1.89787	2.42947	-1.185	4.64837	2.58471		0.719304		1.47169	0.920373	0.528373
Q0J7Y8	11.6575	8.42047	10.2985	10.5773	10.9215	9.99152	3	3	6			2.42664	-0.230842	1.10594	1.20949	1.73454	0.737319		1.16385						5.26923	-0.480168	2.17995	2.42045	3.49932	1.51118			5.26923	-0.480168	2.17995	2.42045	3.49932	1.51118		0.21372		0.153977	0.0978752	0.934408
Q0J8A4	15.8453	12.9582	12.8562	15.7041	13.562	14.2007	3	3	6			6.61451	4.30686	3.66358	6.3363	4.375	4.94647		5.04045						14.3628	8.95861	7.22135	12.6803	8.82628	10.1381			14.3628	8.95861	7.22135	12.6803	8.82628	10.1381		0.4336		0.367302	0.172738	0.887158
Q0J8G4	11.3227	10.3267	11.4524	11.8575	11.1238	11.6232	3	3	6			2.09185	1.67535	2.25987	2.48967	1.93679	2.36904		2.13709						4.54226	3.48485	4.45448	4.98237	3.90736	4.85549			4.54226	3.48485	4.45448	4.98237	3.90736	4.85549		0.998865		0.421207	1.22022	0.429216
Q0J8Q3	10.4737	8.95417	11.1595	10.1754	8.79347	9.02453	3	3	6			1.24289	0.30286	1.96692	0.807577	-0.393532	-0.229672		0.616174						2.69883	0.629972	3.87703	1.61614	-0.793925	-0.470727			2.69883	0.629972	3.87703	1.61614	-0.793925	-0.470727		0.775531		-2.28478	2.91372	0.132703
Q0J930	7.93846	8.91214	7.02159	8.14011	7.67546	5.43196	3	3	6			-1.29235	0.260834	-2.17099	-1.22773	-1.51154	-3.82225		-1.62734						-2.80622	0.542554	-4.27928	-2.45696	-3.04944	-7.83392			-2.80622	0.542554	-4.27928	-2.45696	-3.04944	-7.83392		0.825206		-2.26579	1.45276	0.365323
Q0J932	4.46356	8.81336	8.09935	8.45927	10.5936	8.83577	3	3	6			-4.76726	0.162057	-1.09323	-0.90858	1.40657	-0.418436		-0.936479						-10.3517	0.337091	-2.15489	-1.81827	2.83767	-0.85761			-10.3517	0.337091	-2.15489	-1.81827	2.83767	-0.85761		0.323852		4.11042	1.69621	0.308596
Q0J952	9.93152	8.75108	10.8145	10.8516	9.94427	8.82372	3	3	6			0.700708	0.0997683	1.62193	1.48375	0.757268	-0.430485		0.705488						1.52153	0.207526	3.19701	2.9693	1.52774	-0.882304			1.52153	0.207526	3.19701	2.9693	1.52774	-0.882304		0.744409		-0.437109	0.370957	0.773269
Q0J954	7.49554	9.45276	8.94213	8.51448	9.91739	10.1618	3	3	6			-1.73528	0.801449	-0.250444	-0.85337	0.730382	0.907559		-0.0666169						-3.768	1.66707	-0.493655	-1.70778	1.4735	1.8601			-3.768	1.66707	-0.493655	-1.70778	1.4735	1.8601		0.677161		1.4068	0.974116	0.509052
Q0J995	9.58297	10.4026	10.8539	9.97183	9.87101	10.5488	3	3	6			0.352157	1.75128	1.66128	0.603983	0.684007	1.29462		1.05789						0.764679	3.64279	3.27458	1.2087	1.37994	2.6534			0.764679	3.64279	3.27458	1.2087	1.37994	2.6534		0.405071		-0.813336	1.09891	0.46687
Q0J998	8.88844	7.75736	7.36955	11.0282	10.9856	9.97269	3	3	6			-0.342374	-0.89395	-1.82302	1.66033	1.79855	0.71849		0.186338						-0.743434	-1.85948	-3.5934	3.32269	3.62846	1.47259			-0.743434	-1.85948	-3.5934	3.32269	3.62846	1.47259		0.795012		4.87335	6.59825	0.0103212
Q0J9J6	12.058	10.0104	10.3132	12.3138	9.892	10.7846	3	3	6			2.82715	1.35908	1.12065	2.94597	0.704991	1.53043		1.74804						6.1389	2.82699	2.20893	5.89553	1.42227	3.13671			6.1389	2.82699	2.20893	5.89553	1.42227	3.13671		0.934356		-0.240099	0.152805	0.8995
Q0J9V3	13.4427	10.2383	10.8784	11.5454	10.1577	10.3758	3	3	6			4.21187	1.58698	1.68578	2.1775	0.970721	1.1216		1.95908						9.14571	3.30104	3.32288	4.35766	1.95837	2.29878			9.14571	3.30104	3.32288	4.35766	1.95837	2.29878		0.25868		-2.38494	1.66068	0.31629
Q0JA29	11.2259	9.84452	9.76739	10.2174	10.8206	10.2772	3	3	6			1.99512	1.19321	0.574813	0.849504	1.63357	1.02297		1.21153						4.33222	2.48197	1.13303	1.70004	3.29563	2.09664			4.33222	2.48197	1.13303	1.70004	3.29563	2.09664		0.422123		-0.28497	0.324823	0.798397
Q0JA81	9.8382	10.5397	9.28158	11.4822	11.2743	12.6146	3	3	6			0.607383	1.88843	0.0890051	2.1143	2.08731	3.36044		1.69115						1.31888	3.92808	0.17544	4.23119	4.21102	6.88742			1.31888	3.92808	0.17544	4.23119	4.21102	6.88742		0.780907		3.30241	3.62628	0.0809808
Q0JA82	8.76809	10.3556	11.2159	10.4102	10.5573	10.5626	3	3	6			-0.462728	1.70426	2.02332	1.04239	1.37027	1.30842		1.16432						-1.00477	3.545	3.98821	2.08605	2.76443	2.68169			-1.00477	3.545	3.98821	2.08605	2.76443	2.68169		0.0352343		0.334578	0.227677	0.854009
Q0JA83	10.3583	8.62651	9.06426	10.5751	10.1258	8.90373	3	3	6			1.12751	-0.024795	-0.128319	1.20722	0.938796	-0.350471		0.461656						2.44829	-0.0515754	-0.252933	2.41591	1.89396	-0.718312			2.44829	-0.0515754	-0.252933	2.41591	1.89396	-0.718312		0.890734		0.482593	0.45471	0.729657
Q0JAA0	11.4418	7.82566	11.1864	10.8513	8.23974	9.48436	3	3	6			2.21099	-0.825649	1.99385	1.48343	-0.947263	0.230157		0.690919						4.80097	-1.71741	3.93011	2.96867	-1.91104	0.471721			4.80097	-1.71741	3.93011	2.96867	-1.91104	0.471721		0.644452		-1.82811	0.993591	0.502226
Q0JAD9	10.2753	11.0564	9.57792	9.30627	9.89966	10.455	3	3	6			1.0445	2.40506	0.385343	-0.0615811	0.712654	1.20082		0.947798						2.26803	5.00271	0.759557	-0.123237	1.43773	2.46115			2.26803	5.00271	0.759557	-0.123237	1.43773	2.46115		0.536007		-1.41822	1.3814	0.383847
Q0JAW2	8.43325	9.10622	8.15952	7.64623	6.91755	9.21999	3	3	6			-0.797561	0.454916	-1.03306	-1.72161	-2.26945	-0.0342111		-0.900164						-1.73183	0.946259	-2.03628	-3.44533	-4.57848	-0.0701177			-1.73183	0.946259	-2.03628	-3.44533	-4.57848	-0.0701177		0.657439		-1.75735	1.5247	0.347552
Q0JB88	8.84354	9.94612	10.5601	10.9943	8.79373	9.89163	3	3	6			-0.387268	1.29481	1.36756	1.62643	-0.393272	0.637429		0.69095						-0.840919	2.6933	2.69564	3.25485	-0.7934	1.30645			-0.840919	2.6933	2.69564	3.25485	-0.7934	1.30645		0.991855		-0.260039	0.179353	0.883099
Q0JB89	8.91642	8.3271	5.38457	3.25208	7.19594	7.63241	3	3	6			-0.314396	-0.324204	-3.80801	-6.11577	-1.99107	-1.62179		-2.36254						-0.682682	-0.674368	-7.50605	-12.239	-4.01685	-3.32395			-0.682682	-0.674368	-7.50605	-12.239	-4.01685	-3.32395		0.774364		-3.57223	1.38072	0.384027
Q0JB92	10.1711	6.71301	10.1519	7.44708	6.56065	6.45416	3	3	6			0.940239	-1.9383	0.959327	-1.92076	-2.62635	-2.80004		-1.23098						2.04165	-4.03181	1.89095	-3.84387	-5.29849	-5.73886			2.04165	-4.03181	1.89095	-3.84387	-5.29849	-5.73886		0.151518		-4.92734	3.70031	0.0769302
Q0JBP5	7.96895	8.62059	11.1849	9.83507	10.3134	11.4001	3	3	6			-1.26186	-0.0307207	1.99236	0.467224	1.12644	2.14588		0.739888						-2.74001	-0.0639014	3.92718	0.935017	2.27253	4.3981			-2.74001	-0.0639014	3.92718	0.935017	2.27253	4.3981		0.426365		2.16079	1.40183	0.378448
Q0JBY9	11.0828	9.14479	10.3271	11.9499	11.223	10.8701	3	3	6			1.852	0.493479	1.13453	2.58202	2.03597	1.61585		1.61897						4.02146	1.02647	2.23629	5.16718	4.10744	3.31179			4.02146	1.02647	2.23629	5.16718	4.10744	3.31179		0.552481		1.7674	2.65327	0.158959
Q0JC10	2.47672	8.11806	6.2842	10.6684	7.81788	6.94486	3	3	6			-6.75409	-0.533249	-2.90838	1.30059	-1.36913	-2.30934		-2.0956						-14.6659	-1.1092	-5.73276	2.60277	-2.76212	-4.73314			-14.6659	-1.1092	-5.73276	2.60277	-2.76212	-4.73314		0.465654		5.53846	1.78715	0.289743
Q0JC27	10.8718	9.71399	7.84116	11.042	11.1122	10.9476	3	3	6			1.64102	1.06268	-1.35142	1.67415	1.92524	1.69336		1.1075						3.56332	2.21046	-2.66382	3.35035	3.88405	3.47065			3.56332	2.21046	-2.66382	3.35035	3.88405	3.47065		0.0145044		2.53169	1.67935	0.312224
Q0JC44	9.97327	9.12528	10.5327	10.643	10.6506	11.2293	3	3	6			0.742454	0.473977	1.34017	1.2752	1.4636	1.9751		1.21175						1.61217	0.985909	2.64163	2.55195	2.95271	4.04808			1.61217	0.985909	2.64163	2.55195	2.95271	4.04808		0.923697		1.43768	3.40798	0.0942095
Q0JCC3	10.1429	9.18386	10.1042	9.06296	9.62057	10.0653	3	3	6			0.91206	0.532552	0.911628	-0.304884	0.433563	0.811079		0.549333						1.98046	1.10775	1.79693	-0.61014	0.874686	1.66236			1.98046	1.10775	1.79693	-0.61014	0.874686	1.66236		0.274369		-0.986079	2.05188	0.241169
Q0JCT1	11.6456	11.1152	11.509	12.3361	11.6807	12.1605	3	3	6			2.4148	2.46387	2.31641	2.96824	2.49366	2.9063		2.59388						5.24353	5.12503	4.56592	5.9401	5.0308	5.95663			5.24353	5.12503	4.56592	5.9401	5.0308	5.95663		0.636264		0.664354	2.76256	0.147363
Q0JCU7	10.478	6.4968	8.05485	10.1073	8.69728	8.47869	3	3	6			1.24715	-2.15451	-1.13773	0.7395	-0.489725	-0.775514		-0.428471						2.70807	-4.48154	-2.2426	1.4799	-0.987988	-1.58946			2.70807	-4.48154	-2.2426	1.4799	-0.987988	-1.58946		0.326994		0.972841	0.521159	0.696812
Q0JCZ4	10.7563	8.16722	11.4666	11.1556	9.59895	11.334	3	3	6			1.52549	-0.48409	2.27406	1.78779	0.411941	2.07979		1.26583						3.31247	-1.00694	4.48245	3.57776	0.831064	4.26266			3.31247	-1.00694	4.48245	3.57776	0.831064	4.26266		0.565821		0.627836	0.384487	0.766052
Q0JD07	9.53697	9.08738	9.8632	10.7206	9.01756	9.79255	3	3	6			0.306153	0.436076	0.670618	1.35274	-0.169445	0.538344		0.522414						0.664785	0.907072	1.32187	2.70713	-0.341844	1.10337			0.664785	0.907072	1.32187	2.70713	-0.341844	1.10337		0.0906355		0.191641	0.248109	0.841999
Q0JD85	9.57134	7.67476	6.36776	8.0242	11.6783	9.47082	3	3	6			0.340523	-0.97655	-2.82482	-1.34365	2.49129	0.216619		-0.349432						0.739416	-2.0313	-5.56807	-2.68894	5.02601	0.443974			0.739416	-2.0313	-5.56807	-2.68894	5.02601	0.443974		0.798		3.21366	1.60641	0.328414
Q0JDC6	12.3396	7.70079	6.15955	8.41671	7.49249	12.32	3	3	6			3.10881	-0.950521	-3.03303	-0.951135	-1.69451	3.06584		-0.0757573						6.75052	-1.97716	-5.97847	-1.90343	-3.41857	6.28362			6.75052	-1.97716	-5.97847	-1.90343	-3.41857	6.28362		0.782711		0.722241	0.171251	0.888072
Q0JDM0	9.31354	10.8978	10.4974	10.4139	8.81144	10.2897	3	3	6			0.0827281	2.24654	1.30478	1.0461	-0.375566	1.03547		0.890007						0.179637	4.67297	2.57187	2.09347	-0.75768	2.12226			0.179637	4.67297	2.57187	2.09347	-0.75768	2.12226		0.702608		-1.32214	1.12636	0.458071
Q0JE32	10.3998	6.20067	10.6151	9.67288	9.08052	10.9799	3	3	6			1.169	-2.45063	1.4225	0.305037	-0.106481	1.72572		0.344191						2.53838	-5.09751	2.80392	0.610446	-0.214818	3.53697			2.53838	-5.09751	2.80392	0.610446	-0.214818	3.53697		0.323615		1.22927	0.542889	0.686395
Q0JF01	10.5448	7.21121	7.83048	10.9924	6.80155	10.8735	3	3	6			1.31396	-1.4401	-1.36209	1.62459	-2.38546	1.61932		-0.104963						2.85315	-2.99552	-2.68485	3.25117	-4.81251	3.31889			2.85315	-2.99552	-2.68485	3.25117	-4.81251	3.31889		0.662582		1.52826	0.583292	0.667439
Q0JF21	8.9009	8.88874	6.88325	6.98208	7.99005	6.75916	3	3	6			-0.329916	0.237436	-2.30932	-2.38577	-1.19696	-2.49505		-1.41326						-0.716383	0.493885	-4.55196	-4.77444	-2.41479	-5.11375			-0.716383	0.493885	-4.55196	-4.77444	-2.41479	-5.11375		0.474962		-2.50951	2.16443	0.22307
Q0JF48	11.0158	11.6193	12.0386	9.6014	11.6676	12.4495	3	3	6			1.78495	2.96795	2.84603	0.233552	2.48059	3.19528		2.25139						3.87586	6.17356	5.60988	0.467388	5.00444	6.54892			3.87586	6.17356	5.60988	0.467388	5.00444	6.54892		0.250993		-1.21285	0.816128	0.567964
Q0JF58	10.5918	12.667	12.2674	9.89545	11.9596	9.74049	3	3	6			1.36099	4.01567	3.07482	0.527606	2.77256	0.486287		2.03966						2.95527	8.3529	6.06085	1.05586	5.59347	0.996674			2.95527	8.3529	6.06085	1.05586	5.59347	0.996674		0.973079		-3.24101	2.23952	0.211757
Q0JFH7	7.63597	7.51065	7.96099	8.17812	8.27622	7.29554	3	3	6			-1.59484	-1.14066	-1.23159	-1.18973	-0.910788	-1.95866		-1.33771						-3.46306	-2.37266	-2.42761	-2.38091	-1.83746	-4.0144			-3.46306	-2.37266	-2.42761	-2.38091	-1.83746	-4.0144		0.454331		0.0101894	0.0148925	0.98973
Q0JFI2	10.7904	8.64757	8.76235	7.65971	10.4455	8.15107	3	3	6			1.55962	-0.00374075	-0.430228	-1.70814	1.25853	-1.10314		-0.0711828						3.38657	-0.00778105	-0.848032	-3.41836	2.539	-2.26094			3.38657	-0.00778105	-0.848032	-3.41836	2.539	-2.26094		0.669999		-1.89035	1.1663	0.445563
Q0JFN7	9.38185	8.67197	8.04843	7.84969	10.5181	8.38383	3	3	6			0.151033	0.0206585	-1.14414	-1.51816	1.33106	-0.870369		-0.338321						0.327955	0.0429712	-2.25525	-3.03817	2.68532	-1.78387			0.327955	0.0429712	-2.25525	-3.03817	2.68532	-1.78387		0.362849		-0.0841335	0.0481958	0.967145
Q0JG98	3.58171	5.04383	8.87271	11.9837	12.4965	4.08984	3	3	6			-5.6491	-3.60748	-0.319872	2.61589	3.30952	-5.16437		-1.46923						-12.2665	-7.50384	-0.630506	5.23498	6.67675	-10.5847			-12.2665	-7.50384	-0.630506	5.23498	6.67675	-10.5847		0.543455		7.24264	1.61601	0.326236
Q0JGK4	10.87	10.0153	9.42859	10.6322	10.4842	11.2785	3	3	6			1.63917	1.36397	0.236013	1.26433	1.29721	2.02431		1.30417						3.55931	2.83716	0.465211	2.5302	2.61705	4.14893			3.55931	2.83716	0.465211	2.5302	2.61705	4.14893		0.480733		0.811502	1.02534	0.491294
Q0JGM8	4.58682	8.60002	4.97989	6.47871	6.00383	9.54606	3	3	6			-4.64399	-0.0512827	-4.21269	-2.88913	-3.18318	0.291862		-2.44807						-10.084	-0.106672	-8.30372	-5.78179	-6.42186	0.59819			-10.084	-0.106672	-8.30372	-5.78179	-6.42186	0.59819		0.694535		2.29631	0.789568	0.578517
Q0JGZ6	8.54357	9.81057	8.00764	8.2564	7.67617	7.93009	3	3	6			-0.687239	1.15926	-1.18493	-1.11145	-1.51084	-1.32412		-0.776552						-1.49228	2.41136	-2.33565	-2.22426	-3.04802	-2.71385			-1.49228	2.41136	-2.33565	-2.22426	-3.04802	-2.71385		0.0521313		-2.18985	2.22785	0.213476
Q0JHF1	10.5338	9.0561	7.40837	7.09096	4.69365	5.17185	3	3	6			1.303	0.404789	-1.78421	-2.27689	-4.49335	-4.08236		-1.8215						2.82936	0.841991	-3.51688	-4.55655	-9.06505	-8.36703			2.82936	0.841991	-3.51688	-4.55655	-9.06505	-8.36703		0.717011		-7.38103	4.86269	0.0343705
Q0JHF8	10.3818	9.64557	4.60573	9.90197	8.25352	9.60136	3	3	6			1.15095	0.994261	-4.58685	0.53412	-0.933488	0.34716		-0.415641						2.49918	2.06814	-9.04123	1.06889	-1.88325	0.711525			2.49918	2.06814	-9.04123	1.06889	-1.88325	0.711525		0.114376		1.45702	0.459985	0.726994
Q0JHU7	10.6668	11.4962	10.9539	5.96984	9.54206	9.03334	3	3	6			1.43594	2.8449	1.76133	-3.39801	0.35506	-0.220862		0.46306						3.11803	5.9176	3.47179	-6.80016	0.71631	-0.45267			3.11803	5.9176	3.47179	-6.80016	0.71631	-0.45267		0.248794		-6.34798	3.97193	0.0637282
Q0JHZ2	10.0568	6.86505	11.6112	11.6252	10.0157	12.0394	3	3	6			0.825961	-1.78625	2.41863	2.25731	0.828689	2.78516		1.22158						1.7935	-3.71554	4.76742	4.51738	1.67183	5.70836			1.7935	-3.71554	4.76742	4.51738	1.67183	5.70836		0.376876		3.0174	1.57576	0.335466
Q0JI49	10.2741	10.8909	11.0611	10.1438	10.7054	9.94162	3	3	6			1.04333	2.23957	1.86852	0.775918	1.51837	0.687417		1.35552						2.2655	4.65847	3.68309	1.55278	3.06321	1.4089			2.2655	4.65847	3.68309	1.55278	3.06321	1.4089		0.734202		-1.52739	2.68799	0.15518
Q0JIF2	9.83452	9.59949	8.61257	8.18938	9.12874	10.0599	3	3	6			0.603706	0.948178	-0.580004	-1.17847	-0.0582631	0.805683		0.0901387						1.31089	1.97228	-1.14326	-2.35837	-0.117542	1.6513			1.31089	1.97228	-1.14326	-2.35837	-0.117542	1.6513		0.800451		-0.98818	0.87428	0.545526
Q0JIL1	9.20928	8.52321	7.43937	10.7805	9.23774	9.04813	3	3	6			-0.0215298	-0.128098	-1.7532	1.41261	0.0507308	-0.20607		-0.107593						-0.0467501	-0.266454	-3.45578	2.82694	0.102346	-0.422352			-0.0467501	-0.266454	-3.45578	2.82694	0.102346	-0.422352		0.910598		2.09197	2.09756	0.233653
Q0JIZ1	8.47277	8.90611	9.74493	10.5763	10.1426	8.83665	3	3	6			-0.758041	0.254802	0.552358	1.20845	0.955613	-0.417552		0.299271						-1.64602	0.530007	1.08876	2.41837	1.92789	-0.855799			-1.64602	0.530007	1.08876	2.41837	1.92789	-0.855799		0.802045		1.17257	1.23888	0.423702
Q0JJ01	9.0598	11.0158	9.94443	10.3798	5.75417	11.6962	3	3	6			-0.171008	2.36446	0.751857	1.01196	-3.43284	2.44203		0.494409						-0.37133	4.91825	1.482	2.02516	-6.92553	5.00508			-0.37133	4.91825	1.482	2.02516	-6.92553	5.00508		0.314852		-1.97474	0.644511	0.63971
Q0JJ05	12.7687	11.0003	11.6747	12.6862	12.8638	12.4095	3	3	6			3.53787	2.34897	2.4821	3.31837	3.67677	3.15529		3.08656						7.68217	4.88605	4.89252	6.64078	7.41766	6.46697			7.68217	4.88605	4.89252	6.64078	7.41766	6.46697		0.179432		1.02156	1.49727	0.354222
Q0JJE3	5.6522	6.55322	6.89373	10.24	4.86701	10.2955	3	3	6			-3.57861	-2.09808	-2.29885	0.872109	-4.32	1.04134		-1.73035						-7.77064	-4.36418	-4.53131	1.74528	-8.71532	2.13428			-7.77064	-4.36418	-4.53131	1.74528	-8.71532	2.13428		0.177417		3.94346	1.51805	0.349157
Q0JJS8	7.69836	8.73806	7.44964	9.28519	8.21485	9.12825	3	3	6			-1.53246	0.0867514	-1.74293	-0.0826537	-0.972152	-0.12595		-0.728232						-3.32759	0.180449	-3.43553	-0.165408	-1.96125	-0.258143			-3.32759	0.180449	-3.43553	-0.165408	-1.96125	-0.258143		0.389135		1.39929	1.51458	0.349999
Q0JJZ6	10.857	7.32238	10.6953	9.52003	11.951	12.4697	3	3	6			1.62624	-1.32893	1.50274	0.152181	2.76399	3.21546		1.32195						3.53123	-2.76427	2.96208	0.304548	5.57617	6.59029			3.53123	-2.76427	2.96208	0.304548	5.57617	6.59029		0.968674		2.91399	1.48717	0.356712
Q0JKD0	13.3768	10.5246	11.2096	13.0287	11.7669	11.3587	3	3	6			4.14599	1.87333	2.01706	3.66084	2.57986	2.10445		2.73025						9.00265	3.89667	3.97587	7.32613	5.20469	4.31319			9.00265	3.89667	3.97587	7.32613	5.20469	4.31319		0.437411		-0.0103921	0.00589676	0.995921
Q0JKI9	9.54936	8.50541	8.55129	10.6565	10.2793	10.3701	3	3	6			0.318549	-0.145892	-0.641292	1.28867	1.09226	1.11594		0.504705						0.6917	-0.303467	-1.26406	2.5789	2.20356	2.28719			0.6917	-0.303467	-1.26406	2.5789	2.20356	2.28719		0.0780348		2.64849	6.63768	0.0100429
Q0JKT4	9.82601	10.6048	9.20203	9.53107	8.32652	10.4054	3	3	6			0.595196	1.95352	0.00944864	0.163222	-0.860486	1.15115		0.502009						1.29241	4.06348	0.0186244	0.326642	-1.73597	2.35935			1.29241	4.06348	0.0186244	0.326642	-1.73597	2.35935		0.99008		-1.47483	1.21877	0.429649
Q0JKV1	8.83292	9.6339	10.8755	11.5089	8.66864	10.6795	3	3	6			-0.397891	0.982596	1.68294	2.14104	-0.518368	1.42528		0.885932						-0.863985	2.04387	3.31728	4.28468	-1.04577	2.92119			-0.863985	2.04387	3.31728	4.28468	-1.04577	2.92119		0.749225		0.55431	0.326404	0.797522
Q0JKZ0	10.3629	10.3356	7.57796	7.70113	9.03232	8.01837	3	3	6			1.13212	1.68431	-1.61462	-1.66671	-0.154684	-1.23584		-0.309238						2.45829	3.50349	-3.18261	-3.33546	-0.312064	-2.53292			2.45829	3.50349	-3.18261	-3.33546	-0.312064	-2.53292		0.318784		-2.98654	1.95612	0.257721
Q0JL44	8.67179	7.59455	8.87802	8.76779	11.2014	5.57237	3	3	6			-0.559024	-1.05676	-0.314557	-0.600061	2.01438	-3.68183		-0.699641						-1.21387	-2.19814	-0.62003	-1.20085	4.06389	-7.54613			-1.21387	-2.19814	-0.62003	-1.20085	4.06389	-7.54613		0.0369036		-0.217017	0.0670894	0.954562
Q0JL46	9.42823	7.65234	8.17597	9.37992	9.98542	9.37049	3	3	6			0.197422	-0.998964	-1.0166	0.012072	0.79841	0.116289		-0.148562						0.428684	-2.07792	-2.00385	0.0241586	1.61074	0.238341			0.428684	-2.07792	-2.00385	0.0241586	1.61074	0.238341		0.53405		1.84211	2.96604	0.127977
Q0JL73	10.9477	9.62363	12.0406	9.24465	8.38189	7.6953	3	3	6			1.7169	0.972318	2.84805	-0.123199	-0.805116	-1.5589		0.508342						3.72809	2.0225	5.61386	-0.246547	-1.62427	-3.19507			3.72809	2.0225	5.61386	-0.246547	-1.62427	-3.19507		0.805573		-5.47678	6.05033	0.0150893
Q0JL75	11.04	9.89744	11.4569	10.7187	10.4135	8.28309	3	3	6			1.8092	1.24613	2.26434	1.35086	1.22652	-0.971114		1.15432						3.92853	2.59205	4.46329	2.70336	2.47442	-1.99036			3.92853	2.59205	4.46329	2.70336	2.47442	-1.99036		0.234233		-2.59881	2.43262	0.185228
Q0JLC5	11.6831	9.87323	10.8581	10.6968	11.0084	9.79661	3	3	6			2.45231	1.22192	1.66556	1.32895	1.82142	0.542405		1.50543						5.32498	2.54169	3.28302	2.65951	3.6746	1.11169			5.32498	2.54169	3.28302	2.65951	3.6746	1.11169		0.889975		-1.23463	1.59486	0.331055
Q0JLE4	10.7231	10.585	8.53831	11.7607	10.4336	9.25108	3	3	6			1.49225	1.93366	-0.654272	2.39287	1.24658	-0.00312242		1.06799						3.24029	4.02215	-1.28965	4.78866	2.5149	-0.00639958			3.24029	4.02215	-1.28965	4.78866	2.5149	-0.00639958		0.823203		0.441455	0.237975	0.847935
Q0JLS6	11.1583	10.7454	10.2298	9.79534	10.8738	10.449	3	3	6			1.92748	2.09412	1.0372	0.427494	1.68675	1.19484		1.39465						4.18536	4.35592	2.04445	0.855509	3.4029	2.4489			4.18536	4.35592	2.04445	0.855509	3.4029	2.4489		0.999136		-1.2928	1.805	0.286181
Q0JMB2	7.83359	9.02555	8.9857	9.90369	9.44309	6.06633	3	3	6			-1.39723	0.374248	-0.206878	0.535838	0.256084	-3.18788		-0.604302						-3.03395	0.778464	-0.407781	1.07233	0.516632	-6.53374			-3.03395	0.778464	-0.407781	1.07233	0.516632	-6.53374		0.34946		-0.760503	0.336836	0.791776
Q0JMD4	11.1698	8.51794	9.28958	8.85025	8.24869	10.0625	3	3	6			1.93899	-0.133362	0.0970037	-0.517599	-0.938318	0.808249		0.20916						4.21034	-0.277403	0.191206	-1.03583	-1.893	1.65655			4.21034	-0.277403	0.191206	-1.03583	-1.893	1.65655		0.720997		-1.7988	1.43584	0.369633
Q0JMR0	8.9751	6.06693	9.53695	8.43075	7.76613	9.61939	3	3	6			-0.25571	-2.58438	0.344369	-0.937103	-1.42087	0.365192		-0.748084						-0.555251	-5.3757	0.678794	-1.87535	-2.86652	0.748483			-0.555251	-5.3757	0.678794	-1.87535	-2.86652	0.748483		0.508433		0.419592	0.227621	0.854042
Q0JMV4	8.27933	10.9858	9.85354	9.57488	11.1813	10.7557	3	3	6			-0.951481	2.33446	0.660966	0.207029	1.99427	1.50152		0.957795						-2.06606	4.85586	1.30284	0.414311	4.02331	3.07745			-2.06606	4.85586	1.30284	0.414311	4.02331	3.07745		0.452363		1.14081	0.639499	0.641936
Q0JMW0	7.2879	8.7735	9.46734	9.38627	9.44294	2.91697	3	3	6			-1.94292	0.122195	0.274763	0.0184242	0.255938	-6.33723		-1.26814						-4.21887	0.254174	0.541592	0.0368709	0.516339	-12.9885			-4.21887	0.254174	0.541592	0.0368709	0.516339	-12.9885		0.216456		-3.00407	0.846192	0.556251
Q0JMY1	11.4283	11.5066	10.1914	10.7092	8.45269	10.2404	3	3	6			2.1975	2.85525	0.998852	1.34132	-0.734311	0.986231		1.27414						4.77167	5.93913	1.96886	2.68428	-1.48142	2.02134			4.77167	5.93913	1.96886	2.68428	-1.48142	2.02134		0.907707		-3.15182	2.77758	0.145836
Q0JMY8	12.9376	9.83395	12.0828	8.09777	10.1733	10.1553	3	3	6			3.70682	1.18264	2.89027	-1.27008	0.986297	0.901122		1.39951						8.04903	2.45999	5.69707	-2.54171	1.98979	1.8469			8.04903	2.45999	5.69707	-2.54171	1.98979	1.8469		0.914624		-4.97037	3.52815	0.0866803
Q0JNB6	11.3549	10.9956	11.0391	11.1287	11.5024	11.2543	3	3	6			2.1241	2.34432	1.84648	1.76086	2.31543	2.00006		2.06521						4.61229	4.87636	3.63963	3.52386	4.67123	4.09924			4.61229	4.87636	3.63963	3.52386	4.67123	4.09924		0.873762		-0.277986	0.71637	0.608627
Q0JNK5	14.0865	9.07149	11.3447	13.3346	10.0261	9.66789	3	3	6			4.85566	0.420182	2.15211	3.9667	0.839103	0.41369		2.10791						10.5436	0.874011	4.24206	7.93825	1.69284	0.847882			10.5436	0.874011	4.24206	7.93825	1.69284	0.847882		0.76737		-1.72691	0.60529	0.657339
Q0JNK6	8.41697	7.85443	6.31569	5.32485	10.2954	9.67462	3	3	6			-0.813846	-0.796875	-2.87688	-4.043	1.10842	0.420414		-1.16696						-1.7672	-1.65756	-5.67069	-8.09093	2.23617	0.861663			-1.7672	-1.65756	-5.67069	-8.09093	2.23617	0.861663		0.284987		1.36745	0.482658	0.715658
Q0JP11	10.1906	10.9721	10.592	10.6748	8.77857	9.66187	3	3	6			0.959753	2.32081	1.39941	1.30696	-0.408435	0.407665		0.997695						2.08402	4.82746	2.75841	2.61552	-0.823991	0.835533			2.08402	4.82746	2.75841	2.61552	-0.823991	0.835533		0.81708		-2.34761	2.8038	0.143209
Q0JP99	10.4919	13.1528	7.98048	9.84833	9.04319	11.8896	3	3	6			1.26104	4.50145	-1.21209	0.480478	-0.143814	2.63542		1.25375						2.73824	9.36336	-2.38919	0.961541	-0.290135	5.40144			2.73824	9.36336	-2.38919	0.961541	-0.290135	5.40144		0.409754		-1.21319	0.383845	0.766392
Q0JPT5	7.58661	7.37226	6.92279	7.53029	7.01625	9.7275	3	3	6			-1.6442	-1.27905	-2.26978	-1.83756	-2.17075	0.473293		-1.45468						-3.57023	-2.66052	-4.47402	-3.67736	-4.37936	0.970042			-3.57023	-2.66052	-4.47402	-3.67736	-4.37936	0.970042		0.177323		1.20603	0.914768	0.530429
Q0JQF7	7.57592	6.03142	5.84569	7.65328	9.36087	7.79682	3	3	6			-1.6549	-2.61989	-3.34689	-1.71457	0.173864	-1.45738		-1.76996						-3.59346	-5.44957	-6.59712	-3.43124	0.350759	-2.987			-3.59346	-5.44957	-6.59712	-3.43124	0.350759	-2.987		0.699243		3.19089	3.36114	0.0973183
Q0JR25	10.95	8.77574	7.89518	7.40096	8.95225	6.55897	3	3	6			1.71916	0.124435	-1.2974	-1.96688	-0.234759	-2.69523		-0.725112						3.733	0.258834	-2.55732	-3.93616	-0.473611	-5.52404			3.733	0.258834	-2.55732	-3.93616	-0.473611	-5.52404		0.803673		-3.78944	2.45437	0.182457
Q0JR55	9.85995	8.33597	6.31732	9.53146	10.956	11.1387	3	3	6			0.629141	-0.315336	-2.87526	0.163612	1.76901	1.88452		0.209281						1.36613	-0.655923	-5.66748	0.327423	3.56886	3.86243			1.36613	-0.655923	-5.66748	0.327423	3.56886	3.86243		0.453777		4.23866	2.74446	0.149223
Q0PCS3	9.62121	11.2321	9.96032	9.29946	11.2859	8.20838	3	3	6			0.390397	2.58075	0.767743	-0.068388	2.09892	-1.04582		0.787267						0.847712	5.36816	1.51332	-0.136859	4.23443	-2.14347			0.847712	5.36816	1.51332	-0.136859	4.23443	-2.14347		0.71798		-1.92503	1.12345	0.458996
Q0WLC7	8.57482	10.1886	12.0109	9.97413	9.59841	10.8794	3	3	6			-0.655992	1.53728	2.81834	0.60628	0.411401	1.62515		1.05708						-1.42443	3.19766	5.55528	1.2133	0.829975	3.33084			-1.42443	3.19766	5.55528	1.2133	0.829975	3.33084		0.251614		-0.651465	0.356325	0.781152
Q0WV96	9.00534	8.41967	9.54007	7.22081	9.86558	7.84222	3	3	6			-0.225469	-0.231642	0.347493	-2.14703	0.678574	-1.41198		-0.498343						-0.489585	-0.481833	0.68495	-4.29669	1.36898	-2.89393			-0.489585	-0.481833	0.68495	-4.29669	1.36898	-2.89393		0.0997065		-1.84506	1.5119	0.350648
Q0WVW7	10.8635	10.1119	9.85885	11.162	9.80445	11.1757	3	3	6			1.63268	1.46061	0.666274	1.7941	0.617449	1.92153		1.34877						3.54521	3.03818	1.31331	3.59039	1.24566	3.9383			3.54521	3.03818	1.31331	3.59039	1.24566	3.9383		0.779184		0.292551	0.321405	0.80029
Q109B0	9.69235	12.0701	11.1388	11.0276	11.1048	10.8058	3	3	6			0.461541	3.41881	1.94621	1.65978	1.91779	1.55162		1.82596						1.0022	7.11139	3.83621	3.32159	3.86902	3.18014			1.0022	7.11139	3.83621	3.32159	3.86902	3.18014		0.0279293		-0.52635	0.332096	0.794381
Q109G2	6.8334	4.31933	7.91325	9.00301	5.58634	9.95963	3	3	6			-2.39742	-4.33198	-1.27933	-0.364836	-3.60066	0.705423		-1.87813						-5.20578	-9.01084	-2.52171	-0.730117	-7.2641	1.44581			-5.20578	-9.01084	-2.52171	-0.730117	-7.2641	1.44581		0.681965		3.39664	1.50838	0.351507
Q109R6	5.86069	7.56346	11.8307	10.7183	12.2475	7.62029	3	3	6			-3.37012	-1.08784	2.63814	1.35043	3.06048	-1.63391		0.159528						-7.31792	-2.2628	5.20009	2.7025	6.17432	-3.34879			-7.31792	-2.2628	5.20009	2.7025	6.17432	-3.34879		0.738708		3.30289	0.969808	0.510574
Q10AZ4	9.97885	5.05689	7.49777	7.27277	6.00313	8.54261	3	3	6			0.748041	-3.59442	-1.69481	-2.09508	-3.18388	-0.711596		-1.75529						1.6243	-7.47667	-3.34067	-4.19271	-6.42326	-1.45846			1.6243	-7.47667	-3.34067	-4.19271	-6.42326	-1.45846		0.458924		-0.960468	0.387115	0.764657
Q10AZ7	9.59076	9.63777	8.57947	9.86443	9.80867	9.65042	3	3	6			0.359943	0.986459	-0.61311	0.496586	0.62167	0.396221		0.374628						0.781584	2.05191	-1.20851	0.993777	1.25418	0.812079			0.781584	2.05191	-1.20851	0.993777	1.25418	0.812079		0.0359103		0.478352	0.587808	0.665353
Q10B19	9.49905	7.07425	7.10832	8.15537	6.32297	6.51987	3	3	6			0.268236	-1.57706	-2.08426	-1.21247	-2.86403	-2.73433		-1.70065						0.582451	-3.2804	-4.10833	-2.42642	-5.778	-5.60417			0.582451	-3.2804	-4.10833	-2.42642	-5.778	-5.60417		0.724459		-2.3341	1.90659	0.266722
Q10B79	8.52634	10.1064	8.87335	8.37582	7.3249	6.40643	3	3	6			-0.70447	1.45512	-0.319225	-0.992026	-1.8621	-2.84777		-0.878411						-1.52969	3.02677	-0.629232	-1.98526	-3.75668	-5.83667			-1.52969	3.02677	-0.629232	-1.98526	-3.75668	-5.83667		0.779144		-4.14882	3.63397	0.0805499
Q10B98	10.0352	9.59748	9.41301	9.72199	9.56186	8.82413	3	3	6			0.804399	0.946168	0.220437	0.35414	0.374856	-0.430071		0.378321						1.74668	1.9681	0.434508	0.708712	0.756247	-0.881456			1.74668	1.9681	0.434508	0.708712	0.756247	-0.881456		0.883219		-1.1886	2.52119	0.1742
Q10BH4	7.99972	8.35054	9.76406	10.5012	8.77867	10.0304	3	3	6			-1.23109	-0.300766	0.571482	1.13339	-0.408336	0.776189		0.0901444						-2.67321	-0.625615	1.12646	2.26817	-0.823793	1.59085			-2.67321	-0.625615	1.12646	2.26817	-0.823793	1.59085		0.844192		1.73586	1.75775	0.295709
Q10BT5	10.5988	8.65839	8.50934	8.27729	7.14384	8.81314	3	3	6			1.36798	0.00708292	-0.683238	-1.09056	-2.04316	-0.441063		-0.480493						2.97046	0.014733	-1.34674	-2.18245	-4.12195	-0.903984			2.97046	0.014733	-1.34674	-2.18245	-4.12195	-0.903984		0.700381		-2.94894	2.88326	0.135535
Q10CE4	11.0674	10.0119	11.1427	11.7778	11.549	10.3319	3	3	6			1.83662	1.36062	1.95017	2.40998	2.36196	1.07772		1.83285						3.98806	2.83019	3.84402	4.8229	4.76511	2.20886			3.98806	2.83019	3.84402	4.8229	4.76511	2.20886		0.303201		0.378198	0.500711	0.706758
Q10CE7	9.43517	8.75609	9.31852	8.25011	10.5013	8.83558	3	3	6			0.204358	0.104782	0.125943	-1.11774	1.31433	-0.418626		0.0355088						0.443745	0.217955	0.248249	-2.23684	2.65159	-0.857998			0.443745	0.217955	0.248249	-2.23684	2.65159	-0.857998		0.00471754		-0.451067	0.347371	0.786015
Q10CE8	3.55459	4.24891	10.1704	11.0818	9.35202	9.16279	3	3	6			-5.67622	-4.40239	0.977849	1.71397	0.165016	-0.0914083		-1.21887						-12.3254	-9.15731	1.92746	3.43003	0.33291	-0.187347			-12.3254	-9.15731	1.92746	3.43003	0.33291	-0.187347		0.127844		7.71029	2.64982	0.15934
Q10CH5	8.74298	4.81599	9.86163	7.53364	10.3629	7.59298	3	3	6			-0.48783	-3.83532	0.669053	-1.83421	1.17593	-1.66122		-0.9956						-1.05928	-7.97776	1.31878	-3.67065	2.37235	-3.40477			-1.05928	-7.97776	1.31878	-3.67065	2.37235	-3.40477		0.666607		1.00506	0.352623	0.783159
Q10CI8	9.8809	7.73728	10.2586	7.97619	10.7795	11.3893	3	3	6			0.650087	-0.914026	1.06599	-1.39166	1.59247	2.13505		0.522986						1.41161	-1.90124	2.10119	-2.78501	3.2127	4.37592			1.41161	-1.90124	2.10119	-2.78501	3.2127	4.37592		0.473317		1.06402	0.521316	0.696736
Q10CQ8	10.0537	9.8895	11.5187	10.7431	11.3872	10.8646	3	3	6			0.822842	1.2382	2.32608	1.37522	2.2002	1.61037		1.59548						1.78673	2.57554	4.58498	2.75212	4.43877	3.30055			1.78673	2.57554	4.58498	2.75212	4.43877	3.30055		0.524604		0.514729	0.681056	0.623708
Q10CT5	9.50116	8.28392	9.85848	11.2702	7.21578	10.6159	3	3	6			0.270348	-0.367385	0.665901	1.90233	-1.97123	1.3617		0.310278						0.587037	-0.764189	1.31257	3.80698	-3.97683	2.79089			0.587037	-0.764189	1.31257	3.80698	-3.97683	2.79089		0.116843		0.495208	0.22828	0.853652
Q10D00	14.5129	9.66644	14.052	6.85823	9.28981	14.3879	3	3	6			5.28205	1.01513	4.8594	-2.50962	0.102806	5.13375		2.31392						11.4695	2.11155	9.57846	-5.0223	0.207405	10.5219			11.4695	2.11155	9.57846	-5.0223	0.207405	10.5219		0.562559		-5.81749	1.55254	0.34091
Q10D80	10.7984	9.54481	7.56255	12.3958	11.2451	8.557	3	3	6			1.56758	0.893503	-1.63003	3.02795	2.05813	-0.697198		0.86999						3.40386	1.85855	-3.21299	6.0596	4.15215	-1.42895			3.40386	1.85855	-3.21299	6.0596	4.15215	-1.42895		0.883419		2.24446	1.00898	0.496899
Q10DU0	12.6362	11.0591	11.8703	13.01	9.80929	11.7484	3	3	6			3.40538	2.40783	2.67771	3.64216	0.622281	2.49416		2.54159						7.39449	5.00848	5.27809	7.28875	1.25541	5.11193			7.39449	5.00848	5.27809	7.28875	1.25541	5.11193		0.309244		-1.34166	0.935403	0.522896
Q10DV5	10.2251	9.78321	11.1584	5.07249	10.8974	9.03017	3	3	6			0.994274	1.1319	1.96578	-4.29536	1.71039	-0.224032		0.213826						2.15898	2.35445	3.87479	-8.59595	3.4506	-0.459167			2.15898	2.35445	3.87479	-8.59595	3.4506	-0.459167		0.0456534		-4.66425	1.65085	0.318453
Q10DV7	8.64821	8.74776	10.8357	10.9025	12.1849	9.67557	3	3	6			-0.582599	0.0964495	1.64308	1.53468	2.9979	0.421367		1.01848						-1.26506	0.200622	3.23871	3.07123	6.04807	0.863616			-1.26506	0.200622	3.23871	3.07123	6.04807	0.863616		0.876146		2.60288	1.92261	0.263776
Q10E64	11.0701	8.52787	9.59753	9.78441	9.28123	11.1004	3	3	6			1.83931	-0.123439	0.404954	0.416558	0.0942296	1.8462		0.746301						3.9939	-0.256763	0.798213	0.833624	0.190102	3.78389			3.9939	-0.256763	0.798213	0.833624	0.190102	3.78389		0.856886		0.090757	0.0592633	0.959754
Q10ED2	10.1821	8.54601	10.211	10.4229	7.68391	10.5612	3	3	6			0.951333	-0.1053	1.01846	1.05506	-1.5031	1.30699		0.453907						2.06574	-0.219032	2.00751	2.1114	-3.0324	2.67875			2.06574	-0.219032	2.00751	2.1114	-3.0324	2.67875		0.292647		-0.698819	0.433986	0.740214
Q10EL1	8.06571	9.8591	9.34547	11.1354	9.92139	8.66711	3	3	6			-1.1651	1.20779	0.152895	1.76754	0.73439	-0.587091		0.351738						-2.52991	2.5123	0.301374	3.53724	1.48158	-1.20328			-2.52991	2.5123	0.301374	3.53724	1.48158	-1.20328		0.938788		1.17726	0.765311	0.588327
Q10F03	10.2971	10.3166	10.1658	11.1769	11.335	10.8571	3	3	6			1.06633	1.66531	0.973209	1.80907	2.14799	1.60292		1.54414						2.31545	3.46398	1.91831	3.62035	4.33344	3.28529			2.31545	3.46398	1.91831	3.62035	4.33344	3.28529		0.615682		1.18045	3.30129	0.101441
Q10F39	9.8878	10.8676	9.21067	11.7397	8.47066	11.5627	3	3	6			0.656987	2.21628	0.0180941	2.37189	-0.716346	2.30847		1.14256						1.42659	4.61003	0.0356657	4.74667	-1.44518	4.73135			1.42659	4.61003	0.0356657	4.74667	-1.44518	4.73135		0.602722		0.653517	0.314524	0.804116
Q10FF9	6.08076	6.89542	5.74125	7.56666	10.9296	5.86049	3	3	6			-3.15005	-1.75588	-3.45133	-1.80118	1.74262	-3.39371		-1.96826						-6.84005	-3.65237	-6.80298	-3.60457	3.51563	-6.95561			-6.84005	-3.65237	-6.80298	-3.60457	3.51563	-6.95561		0.209629		3.41695	1.49763	0.354135
Q10FT0	9.88493	11.0323	11.2365	9.65859	10.3631	9.61927	3	3	6			0.654121	2.38101	2.04392	0.290739	1.17614	0.365064		1.15183						1.42037	4.95269	4.0288	0.581832	2.3728	0.74822			1.42037	4.95269	4.0288	0.581832	2.3728	0.74822		0.451721		-2.233	2.87014	0.136774
Q10G56	8.30163	9.81418	10.8462	10.7977	8.41126	10.9147	3	3	6			-0.929179	1.16287	1.65362	1.42989	-0.775748	1.66048		0.700324						-2.01763	2.41887	3.25948	2.86153	-1.56502	3.40326			-2.01763	2.41887	3.25948	2.86153	-1.56502	3.40326		0.960506		0.346349	0.174372	0.886153
Q10G81	4.98445	6.37107	8.5549	8.92787	5.72145	11.3179	3	3	6			-4.24636	-2.28024	-0.637681	-0.439981	-3.46555	2.06372		-1.50101						-9.2206	-4.74306	-1.25695	-0.880498	-6.99152	4.22972			-9.2206	-4.74306	-1.25695	-0.880498	-6.99152	4.22972		0.671034		3.85943	1.36957	0.387006
Q10GB1	9.35755	8.70791	8.68405	8.23726	9.20026	8.16847	3	3	6			0.126739	0.0566041	-0.50853	-1.13059	0.0132561	-1.08573		-0.421375						0.275203	0.117741	-1.00237	-2.26256	0.0267433	-2.22527			0.275203	0.117741	-1.00237	-2.26256	0.0267433	-2.22527		0.440309		-1.28389	2.26161	0.208539
Q10GM3	7.05713	9.6293	9.65555	7.53862	11.3568	9.82362	3	3	6			-2.17369	0.977995	0.462971	-1.82923	2.16978	0.56942		0.0295406						-4.71997	2.0343	0.912573	-3.66069	4.37739	1.16706			-4.71997	2.0343	0.912573	-3.66069	4.37739	1.16706		0.889044		1.21895	0.479633	0.71716
Q10GM4	10.6191	9.18455	12.2106	8.87363	10.8082	9.2974	3	3	6			1.38831	0.533246	3.01803	-0.494219	1.62115	0.0431954		1.01829						3.01459	1.10919	5.94891	-0.989041	3.27058	0.0885316			3.01459	1.10919	5.94891	-0.989041	3.27058	0.0885316		0.904251		-2.56754	2.0098	0.248308
Q10GP0	12.1049	6.58418	7.15299	9.20789	6.92517	10.4671	3	3	6			2.87408	-2.06713	-2.03958	-0.159955	-2.26184	1.21289		-0.406921						6.24081	-4.29978	-4.02026	-0.320105	-4.56311	2.4859			6.24081	-4.29978	-4.02026	-0.320105	-4.56311	2.4859		0.517504		-0.106029	0.0287631	0.98026
Q10GX0	7.25408	10.0185	11.6029	7.81179	10.1789	9.62483	3	3	6			-1.97673	1.36717	2.41035	-1.55606	0.991909	0.37063		0.26788						-4.29229	2.84382	4.7511	-3.11401	2.00111	0.759628			-4.29229	2.84382	4.7511	-3.11401	2.00111	0.759628		0.477068		-1.21863	0.476161	0.718888
Q10HL3	11.8863	13.1972	12.9809	11.3846	12.6378	12.7344	3	3	6			2.65553	4.54592	3.78837	2.01672	3.4508	3.48017		3.32292						5.76625	9.45587	7.46733	4.0359	6.96176	7.13281			5.76625	9.45587	7.46733	4.0359	6.96176	7.13281		0.940986		-1.51966	1.48102	0.358236
Q10I20	10.6218	9.32791	10.0287	9.03331	9.27394	14.1037	3	3	6			1.39096	0.676605	0.836158	-0.334535	0.0869304	4.8495		1.25094						3.02036	1.40739	1.64817	-0.669478	0.175377	9.93933			3.02036	1.40739	1.64817	-0.669478	0.175377	9.93933		0.0426254		1.12311	0.369642	0.773974
Q10JL1	9.42515	9.13878	9.78406	9.43313	9.53146	8.9357	3	3	6			0.19434	0.487477	0.591485	0.0652785	0.344454	-0.318507		0.227421						0.421993	1.01399	1.16589	0.130637	0.694915	-0.652799			0.421993	1.01399	1.16589	0.130637	0.694915	-0.652799		0.504384		-0.809706	2.75998	0.147627
Q10K62	10.6162	10.6431	11.2243	10.9593	9.28313	8.8421	3	3	6			1.38537	1.99183	2.03173	1.5915	0.0961297	-0.412104		1.11408						3.00821	4.14315	4.00478	3.18494	0.193935	-0.844631			3.00821	4.14315	4.00478	3.18494	0.193935	-0.844631		0.161078		-2.87396	3.56239	0.0846475
Q10KF0	10.2182	5.9689	8.09924	9.129	9.45479	4.47099	3	3	6			0.987387	-2.68241	-1.09333	-0.238848	0.267788	-4.78321		-1.2571						2.14402	-5.57962	-2.15509	-0.477988	0.540245	-9.80348			2.14402	-5.57962	-2.15509	-0.477988	0.540245	-9.80348		0.630941		-1.38351	0.423651	0.745536
Q10KF5	11.1698	9.78321	12.1827	5.9986	10.462	10.5397	3	3	6			1.93899	1.1319	2.9901	-3.36925	1.27499	1.28554		0.875378						4.21034	2.35445	5.89384	-6.7426	2.5722	2.63479			4.21034	2.35445	5.89384	-6.7426	2.5722	2.63479		0.194365		-4.66475	2.13351	0.227903
Q10KX8	6.69905	8.72359	6.79546	10.3651	10.5604	10.5433	3	3	6			-2.53176	0.0722856	-2.39712	0.997272	1.37342	1.28912		-0.199464						-5.4975	0.15036	-4.72502	1.99576	2.77079	2.64213			-5.4975	0.15036	-4.72502	1.99576	2.77079	2.64213		0.036127		5.82694	3.6719	0.0784598
Q10KY3	8.56621	9.20134	8.04155	9.1771	9.8076	7.40998	3	3	6			-0.664606	0.550033	-1.15103	-0.190752	0.620591	-1.84422		-0.446663						-1.44313	1.14411	-2.26881	-0.381737	1.252	-3.77983			-1.44313	1.14411	-2.26881	-0.381737	1.252	-3.77983		0.649723		-0.11391	0.0699456	0.952674
Q10L71	8.00068	10.0901	8.46646	11.7796	10.2757	11.0734	3	3	6			-1.23014	1.43881	-0.726113	2.41179	1.08865	1.8192		0.800367						-2.67113	2.99282	-1.43126	4.82652	2.19629	3.72857			-2.67113	2.99282	-1.43126	4.82652	2.19629	3.72857		0.328973		3.95365	3.27391	0.103384
Q10L91	7.28864	10.7206	7.64832	9.57295	9.59233	5.48614	3	3	6			-1.94218	2.06928	-1.54426	0.205099	0.405321	-3.76807		-0.762467						-4.21727	4.30426	-3.04391	0.410447	0.817709	-7.72288			-4.21727	4.30426	-3.04391	0.410447	0.817709	-7.72288		0.95783		-1.17927	0.36804	0.774835
Q10LF7	10.6631	9.50551	10.1457	8.02092	10.2154	10.9518	3	3	6			1.4323	0.854207	0.9531	-1.34692	1.02841	1.69759		0.769781						3.11011	1.77681	1.87868	-2.69549	2.07474	3.47932			3.11011	1.77681	1.87868	-2.69549	2.07474	3.47932		0.0998933		-1.30234	0.904486	0.534223
Q10LG8	9.61796	8.6299	9.00756	11.7248	11.1197	11.2118	3	3	6			0.387151	-0.0214041	-0.185017	2.35692	1.93265	1.95763		1.07132						0.840664	-0.0445222	-0.364691	4.71672	3.899	4.01227			0.840664	-0.0445222	-0.364691	4.71672	3.899	4.01227		0.669803		4.06551	10.3314	0.000776143
Q10LH0	14.0638	5.52995	12.949	14.9951	3.44188	9.32854	3	3	6			4.833	-3.12136	3.75639	5.62726	-5.74512	0.0743379		0.904084						10.4944	-6.49267	7.4043	11.2614	-11.5904	0.15236			10.4944	-6.49267	7.4043	11.2614	-11.5904	0.15236		0.770722		-3.86092	0.577323	0.670206
Q10LI1	9.75434	9.38338	10.05	9.77796	9.96456	9.45098	3	3	6			0.523524	0.732073	0.857407	0.410114	0.777552	0.196782		0.582909						1.13679	1.52277	1.69005	0.820728	1.56866	0.403316			1.13679	1.52277	1.69005	0.820728	1.56866	0.403316		0.37524		-0.518967	2.04735	0.241929
Q10LJ0	11.6815	10.4106	11.2261	10.8489	10.5919	11.4317	3	3	6			2.45073	1.75925	2.03353	1.48109	1.40489	2.1775		1.8845						5.32155	3.65937	4.00834	2.96398	2.83428	4.46293			5.32155	3.65937	4.00834	2.96398	2.83428	4.46293		0.967768		-0.909361	1.83951	0.279417
Q10LN5	11.7754	4.86656	6.52695	6.83378	10.1495	6.3547	3	3	6			2.54455	-3.78475	-2.66563	-2.53407	0.962488	-2.8995		-1.39615						5.52527	-7.87256	-5.25428	-5.07123	1.94176	-5.94271			5.52527	-7.87256	-5.25428	-5.07123	1.94176	-5.94271		0.540712		-0.490203	0.114712	0.923566
Q10LP5	11.1311	10.7979	9.93556	10.1064	8.86904	8.39197	3	3	6			1.90034	2.1466	0.742986	0.738584	-0.317966	-0.862228		0.724718						4.12641	4.46509	1.46451	1.47807	-0.641477	-1.76719			4.12641	4.46509	1.46451	1.47807	-0.641477	-1.76719		0.997305		-3.6622	4.24662	0.0526792
Q10LQ2	9.54821	9.9621	8.90569	12.0976	9.782	9.98883	3	3	6			0.317393	1.31079	-0.286889	2.72979	0.594994	0.734624		0.900117						0.689191	2.72655	-0.565494	5.46291	1.20036	1.50566			0.689191	2.72655	-0.565494	5.46291	1.20036	1.50566		0.656141		1.77289	1.51677	0.349468
Q10LX4	6.26279	3.85659	8.98077	7.52927	7.21616	7.49593	3	3	6			-2.96802	-4.79472	-0.211809	-1.83857	-1.97084	-1.75827		-2.25704						-6.4448	-9.97338	-0.417502	-3.67939	-3.97605	-3.60367			-6.4448	-9.97338	-0.417502	-3.67939	-3.97605	-3.60367		0.00331225		1.85886	0.80118	0.573879
Q10LZ1	9.76866	5.84887	4.41542	7.26557	7.81909	8.36872	3	3	6			0.537851	-2.80243	-4.77716	-2.10228	-1.36791	-0.885478		-1.89957						1.1679	-5.82928	-9.41635	-4.20712	-2.75967	-1.81484			1.1679	-5.82928	-9.41635	-4.20712	-2.75967	-1.81484		0.0954274		1.76537	0.71575	0.608889
Q10M12	9.44477	9.16352	9.8488	9.0258	8.73535	7.69404	3	3	6			0.213954	0.512217	0.656218	-0.342044	-0.451652	-1.56016		-0.161911						0.464582	1.06545	1.29348	-0.684505	-0.911179	-3.19764			0.464582	1.06545	1.29348	-0.684505	-0.911179	-3.19764		0.173313		-2.53895	4.67892	0.0390396
Q10M18	6.41041	6.05065	8.1499	7.54179	8.47241	7.60637	3	3	6			-2.8204	-2.60065	-1.04268	-1.82605	-0.714598	-1.64783		-1.77537						-6.12426	-5.40956	-2.05524	-3.65433	-1.44166	-3.37733			-6.12426	-5.40956	-2.05524	-3.65433	-1.44166	-3.37733		0.470834		1.70524	1.73561	0.300283
Q10M50	9.67929	9.18795	11.9233	11.8614	11.3154	11.0694	3	3	6			0.448474	0.536639	2.73071	2.49355	2.12837	1.81525		1.69217						0.973822	1.11625	5.38257	4.99014	4.29385	3.72046			0.973822	1.11625	5.38257	4.99014	4.29385	3.72046		0.121029		1.84394	1.81503	0.284198
Q10M74	10.5772	6.90677	8.17493	10.473	10.5341	4.52663	3	3	6			1.34643	-1.74454	-1.01765	1.10515	1.3471	-4.72757		-0.61518						2.92365	-3.62877	-2.00591	2.21164	2.71769	-9.68944			2.92365	-3.62877	-2.00591	2.21164	2.71769	-9.68944		0.382111		-0.683022	0.173173	0.88689
Q10M80	9.74032	10.7283	8.56091	7.7809	7.60578	8.644	3	3	6			0.509508	2.07704	-0.631671	-1.58695	-1.58123	-0.610202		-0.303917						1.10635	4.3204	-1.2451	-3.17583	-3.19003	-1.25065			1.10635	4.3204	-1.2451	-3.17583	-3.19003	-1.25065		0.275045		-3.93272	3.5349	0.0862756
Q10MB4	9.8357	10.201	9.25805	8.38405	5.33771	5.66755	3	3	6			0.60489	1.54971	0.0654705	-0.983798	-3.84929	-3.58665		-1.03328						1.31347	3.22352	0.12905	-1.9688	-7.7657	-7.35106			1.31347	3.22352	0.12905	-1.9688	-7.7657	-7.35106		0.378095		-7.25053	5.32422	0.0249604
Q10MC0	6.04155	10.266	10.8285	8.53271	10.0171	9.19736	3	3	6			-3.18926	1.61466	1.63588	-0.835141	0.830082	-0.0568382		-0.000104089						-6.9252	3.35861	3.22451	-1.6713	1.67464	-0.116493			-6.9252	3.35861	3.22451	-1.6713	1.67464	-0.116493		0.149113		0.0763068	0.0235096	0.983836
Q10MH8	10.1306	9.9056	11.6269	10.0993	10.5038	10.9556	3	3	6			0.899758	1.25429	2.43436	0.7315	1.31682	1.70145		1.3897						1.95375	2.60902	4.79843	1.46389	2.6566	3.48722			1.95375	2.60902	4.79843	1.46389	2.6566	3.48722		0.635848		-0.584493	0.726001	0.604577
Q10MI0	12.1529	9.86743	11.1772	11.1716	10.5088	9.92518	3	3	6			2.92207	1.21613	1.98466	1.8037	1.32178	0.670981		1.65322						6.34503	2.52963	3.912	3.60961	2.66661	1.37522			6.34503	2.52963	3.912	3.60961	2.66661	1.37522		0.504352		-1.71174	1.97087	0.255099
Q10MI4	10.569	10.3577	11.347	10.1241	10.2097	10.6065	3	3	6			1.33819	1.70635	2.15438	0.756273	1.02269	1.3523		1.38836						2.90576	3.54935	4.24654	1.51347	2.06322	2.77161			2.90576	3.54935	4.24654	1.51347	2.06322	2.77161		0.938834		-1.45112	4.25341	0.0524318
Q10MI9	9.75954	6.45552	9.12673	7.41608	8.28369	8.69957	3	3	6			0.528726	-2.19578	-0.0658469	-1.95177	-0.903315	-0.55463		-0.857103						1.14808	-4.56739	-0.129792	-3.90592	-1.82238	-1.13675			1.14808	-4.56739	-0.129792	-3.90592	-1.82238	-1.13675		0.375485		-1.10531	0.746675	0.595976
Q10MJ1	15.2021	14.0189	14.1564	14.0828	13.9579	11.3965	3	3	6			5.97131	5.36759	4.96382	4.71497	4.77091	2.1423		4.65515						12.9662	11.165	9.78429	9.43568	9.62501	4.39076			12.9662	11.165	9.78429	9.43568	9.62501	4.39076		0.448213		-3.488	2.76095	0.147527
Q10MN3	10.6061	8.07457	7.45129	8.7284	7.25446	10.6352	3	3	6			1.37531	-0.576737	-1.74128	-0.639451	-1.93254	1.38097		-0.355621						2.98638	-1.19966	-3.43228	-1.27968	-3.89878	2.83038			2.98638	-1.19966	-3.43228	-1.27968	-3.89878	2.83038		0.959866		-0.234172	0.0963048	0.935426
Q10MN5	9.24031	10.9924	13.0551	12.1982	10.8225	10.4179	3	3	6			0.00950175	2.34106	3.86257	2.83038	1.63549	1.16365		1.97378						0.0206322	4.86959	7.61359	5.66422	3.29949	2.38497			0.0206322	4.86959	7.61359	5.66422	3.29949	2.38497		0.324561		-0.385048	0.181888	0.881549
Q10MN8	10.8196	8.72734	7.04188	9.39573	7.09413	9.07585	3	3	6			1.58881	0.0760348	-2.1507	0.027879	-2.09287	-0.178349		-0.454867						3.44996	0.158158	-4.23929	0.0557921	-4.22224	-0.365537			3.44996	0.158158	-4.23929	0.0557921	-4.22224	-0.365537		0.543871		-1.30027	0.633653	0.644542
Q10MQ0	9.23422	8.47925	10.2049	8.77568	9.62029	11.3112	3	3	6			0.00340609	-0.172052	1.01236	-0.592172	0.433288	2.05704		0.456978						0.00739603	-0.357882	1.99549	-1.18507	0.874131	4.21602			0.00739603	-0.357882	1.99549	-1.18507	0.874131	4.21602		0.35511		0.753361	0.542493	0.686583
Q10MQ2	5.32052	7.04865	9.27852	10.7828	11.724	9.63979	3	3	6			-3.91029	-1.60266	0.0859419	1.4149	2.53704	0.385591		-0.181579						-8.49085	-3.33365	0.169402	2.83153	5.11831	0.790291			-8.49085	-3.33365	0.169402	2.83153	5.11831	0.790291		0.396178		6.79841	3.78144	0.0727234
Q10MR0	9.93298	7.25087	10.9894	9.31748	6.48001	5.44616	3	3	6			0.70217	-1.40044	1.79682	-0.0503674	-2.707	-3.80805		-0.911144						1.5247	-2.91302	3.54174	-0.100796	-5.4612	-7.80482			1.5247	-2.91302	3.54174	-0.100796	-5.4612	-7.80482		0.822945		-5.17341	2.67373	0.156721
Q10MW6	11.902	8.58207	10.4487	6.75809	11.2656	12.2789	3	3	6			2.67122	-0.0692404	1.25616	-2.60976	2.07861	3.02474		1.05862						5.80033	-0.144025	2.47604	-5.2227	4.19346	6.19939			5.80033	-0.144025	2.47604	-5.2227	4.19346	6.19939		0.385314		-0.987397	0.297825	0.813478
Q10MX1	8.84383	8.05913	8.68587	9.24527	8.93393	7.35324	3	3	6			-0.386986	-0.592179	-0.506707	-0.12258	-0.253078	-1.90097		-0.627083						-0.840305	-1.23178	-0.998781	-0.24531	-0.510569	-3.89615			-0.840305	-1.23178	-0.998781	-0.24531	-0.510569	-3.89615		0.0185426		-0.527054	0.518106	0.698288
Q10MX2	9.10813	9.38718	8.86592	10.6129	8.47139	10.8539	3	3	6			-0.12268	0.73587	-0.326658	1.24502	-0.715614	1.59965		0.402598						-0.266389	1.53067	-0.643883	2.49156	-1.44371	3.27858			-0.266389	1.53067	-0.643883	2.49156	-1.44371	3.27858		0.348364		1.23535	1.04387	0.485026
Q10MX3	10.5569	10.736	11.5592	11.115	12.2601	11.3454	3	3	6			1.32608	2.08467	2.36666	1.74713	3.07306	2.0912		2.1148						2.87946	4.33628	4.66497	3.49639	6.1997	4.28605			2.87946	4.33628	4.66497	3.49639	6.1997	4.28605		0.637011		0.70048	0.968448	0.511056
Q10N03	7.7492	6.41383	6.21142	7.23783	7.25115	6.77873	3	3	6			-1.48161	-2.23748	-2.98116	-2.13002	-1.93585	-2.47547		-2.20693						-3.21719	-4.65412	-5.87622	-4.26263	-3.90546	-5.07362			-3.21719	-4.65412	-5.87622	-4.26263	-3.90546	-5.07362		0.33648		0.168607	0.232505	0.851156
Q10N04	7.68524	9.88903	8.82056	9.58714	9.5877	8.41079	3	3	6			-1.54557	1.23773	-0.372015	0.219292	0.400698	-0.843412		-0.150548						-3.35608	2.57456	-0.733287	0.438851	0.808381	-1.72862			-3.35608	2.57456	-0.733287	0.438851	0.808381	-1.72862		0.350767		0.34447	0.210549	0.864208
Q10N05	8.81256	6.6605	6.8732	10.2229	8.40807	6.09837	3	3	6			-0.41825	-1.99081	-2.31938	0.855068	-0.77893	-3.15583		-1.30136						-0.908193	-4.14104	-4.57178	1.71118	-1.57144	-6.46807			-0.908193	-4.14104	-4.57178	1.71118	-1.57144	-6.46807		0.382761		1.09756	0.516176	0.699223
Q10N21	12.2486	9.48766	9.51635	10.839	10.1759	10.6722	3	3	6			3.01783	0.836352	0.323773	1.47112	0.988919	1.41805		1.34267						6.55294	1.73968	0.638196	2.94403	1.99508	2.90637			6.55294	1.73968	0.638196	2.94403	1.99508	2.90637		0.0567088		-0.361778	0.227866	0.853897
Q10N34	9.3526	8.51857	8.596	9.28854	12.1443	8.79714	3	3	6			0.121783	-0.132733	-0.596574	-0.0793047	2.9573	-0.45706		0.302236						0.26444	-0.276094	-1.17592	-0.158706	5.96617	-0.936771			0.26444	-0.276094	-1.17592	-0.158706	5.96617	-0.936771		0.0714249		2.01942	1.26872	0.415027
Q10N44	6.98413	8.06302	6.98778	7.94269	9.62565	11.4887	3	3	6			-2.24668	-0.58829	-2.2048	-1.42516	0.438649	2.23454		-0.631956						-4.87847	-1.22369	-4.34593	-2.85205	0.884946	4.57983			-4.87847	-1.22369	-4.34593	-2.85205	0.884946	4.57983		0.440315		4.3536	2.7602	0.147604
Q10NB9	12.8564	10.4626	9.61539	8.87676	10.7892	11.1365	3	3	6			3.62559	1.8113	0.422813	-0.491085	1.6022	1.88234		1.47553						7.87266	3.76764	0.833416	-0.982769	3.23234	3.85797			7.87266	3.76764	0.833416	-0.982769	3.23234	3.85797		0.713383		-2.12206	1.1478	0.451313
Q10NJ6	8.38418	9.6828	10.2077	9.92624	10.1447	10.7763	3	3	6			-0.846633	1.03149	1.01517	0.558389	0.957653	1.52207		0.706356						-1.83839	2.14559	2.00102	1.11746	1.932	3.11957			-1.83839	2.14559	2.00102	1.11746	1.932	3.11957		0.331309		1.28694	1.25672	0.418494
Q10NT7	8.44795	9.23876	10.789	8.98014	10.2807	10.7683	3	3	6			-0.782862	0.587456	1.59639	-0.387708	1.09365	1.51406		0.603498						-1.69991	1.22195	3.14667	-0.775889	2.20637	3.10317			-1.69991	1.22195	3.14667	-0.775889	2.20637	3.10317		0.818342		0.621646	0.412045	0.751557
Q10NX8	8.69877	9.68648	9.39015	9.02348	7.97447	10.0984	3	3	6			-0.532038	1.03518	0.19757	-0.344371	-1.21253	0.844225		-0.00199525						-1.15527	2.15324	0.389435	-0.689161	-2.44621	1.73029			-1.15527	2.15324	0.389435	-0.689161	-2.44621	1.73029		0.767892		-0.930828	0.788975	0.578755
Q10NY2	15.1533	9.85493	9.07473	13.6674	10.1355	13.6417	3	3	6			5.9225	1.20362	-0.117847	4.2996	0.948448	4.38751		2.77397						12.8602	2.50363	-0.232291	8.60443	1.91343	8.99247			12.8602	2.50363	-0.232291	8.60443	1.91343	8.99247		0.498612		1.4596	0.382747	0.766976
Q10P01	11.0941	4.316	7.06996	10.7951	5.0754	11.9611	3	3	6			1.86333	-4.33531	-2.12262	1.4273	-4.1116	2.70685		-0.762007						4.04606	-9.01777	-4.18394	2.85634	-8.29489	5.54785			4.04606	-9.01777	-4.18394	2.85634	-8.29489	5.54785		0.894948		3.08831	0.697206	0.616765
Q10P60	9.80135	9.14415	9.3959	7.83472	9.17607	8.94448	3	3	6			0.57054	0.492841	0.203321	-1.53312	-0.0109316	-0.309725		-0.0978463						1.23888	1.02515	0.40077	-3.06812	-0.0220538	-0.634799			1.23888	1.02515	0.40077	-3.06812	-0.0220538	-0.634799		0.136176		-2.12992	3.44876	0.091584
Q10P67	9.71024	11.2352	8.91946	11.5769	10.2867	9.17183	3	3	6			0.479426	2.58393	-0.273118	2.20906	1.09967	-0.0823751		1.00277						1.04103	5.37477	-0.538349	4.42082	2.21851	-0.168833			1.04103	5.37477	-0.538349	4.42082	2.21851	-0.168833		0.719695		0.197681	0.100046	0.933003
Q10P83	4.18864	5.35572	9.17685	5.98459	6.95303	11.1587	3	3	6			-5.04217	-3.29559	-0.0157309	-3.38326	-2.23397	1.90447		-2.01104						-10.9486	-6.85507	-0.0310075	-6.77064	-4.5069	3.90333			-10.9486	-6.85507	-0.0310075	-6.77064	-4.5069	3.90333		0.980473		3.48683	1.04092	0.486017
Q10P87	5.55358	6.20091	7.34784	6.79507	8.93458	6.29468	3	3	6			-3.67724	-2.4504	-1.84473	-2.57278	-0.25243	-2.95953		-2.29285						-7.9848	-5.09702	-3.63619	-5.1487	-0.50926	-6.06573			-7.9848	-5.09702	-3.63619	-5.1487	-0.50926	-6.06573		0.711267		1.66477	1.0573	0.48053
Q10PC5	11.0103	8.57236	11.1104	9.56367	8.18701	9.80405	3	3	6			1.77951	-0.0789479	1.91784	0.195825	-0.999999	0.549848		0.560679						3.86404	-0.164218	3.7803	0.391889	-2.01743	1.12695			3.86404	-0.164218	3.7803	0.391889	-2.01743	1.12695		0.675988		-2.65957	2.48351	0.178809
Q10PE7	7.97441	6.92291	7.8071	9.03205	9.47549	9.81983	3	3	6			-1.2564	-1.7284	-1.38548	-0.335802	0.288485	0.565625		-0.641994						-2.72816	-3.59519	-2.73095	-0.672014	0.582	1.15928			-2.72816	-3.59519	-2.73095	-0.672014	0.582	1.15928		0.443519		3.37452	7.55902	0.00530284
Q10PI6	5.60377	7.30168	7.38776	10.9197	7.71418	9.24717	3	3	6			-3.62704	-1.34963	-1.80482	1.55183	-1.47283	-0.00703438		-1.11825						-7.87579	-2.80733	-3.55752	3.10556	-2.97134	-0.0144174			-7.87579	-2.80733	-3.55752	3.10556	-2.97134	-0.0144174		0.895254		4.78682	3.15204	0.112497
Q10PL5	9.77307	7.6372	6.84587	8.26552	9.09154	7.24375	3	3	6			0.542261	-1.0141	-2.34671	-1.10233	-0.0954638	-2.01046		-1.00447						1.17747	-2.10941	-4.62565	-2.206	-0.192592	-4.12055			1.17747	-2.10941	-4.62565	-2.206	-0.192592	-4.12055		0.62597		-0.320517	0.181112	0.882023
Q10PP8	9.12727	6.09162	9.52335	7.14608	7.5093	4.56023	3	3	6			-0.10354	-2.55969	0.330769	-2.22176	-1.67771	-4.69398		-1.82098						-0.224829	-5.32435	0.651986	-4.44623	-3.38466	-9.62059			-0.224829	-5.32435	0.651986	-4.44623	-3.38466	-9.62059		0.966762		-4.18476	2.37012	0.19343
Q10PQ9	10.3723	6.96371	9.54788	7.86864	9.43315	8.65732	3	3	6			1.14151	-1.6876	0.355301	-1.49921	0.246142	-0.596884		-0.340124						2.47868	-3.51034	0.70034	-3.00025	0.496576	-1.22335			2.47868	-3.51034	0.70034	-3.00025	0.496576	-1.22335		0.488477		-1.1319	0.715469	0.609007
Q10PR4	10.5341	10.5393	7.70839	5.29668	8.33078	9.54986	3	3	6			1.3033	1.88795	-1.48418	-4.07117	-0.856223	0.295659		-0.487445						2.82999	3.92708	-2.9255	-8.1473	-1.72737	0.605971			2.82999	3.92708	-2.9255	-8.1473	-1.72737	0.605971		0.794724		-4.36676	1.91643	0.26491
Q10PV9	8.35363	8.53481	9.19456	10.5269	6.95443	7.06792	3	3	6			-0.877181	-0.116498	0.00198268	1.15904	-2.23258	-2.18628		-0.708586						-1.90472	-0.242326	0.0039081	2.3195	-4.50408	-4.48092			-1.90472	-0.242326	0.0039081	2.3195	-4.50408	-4.48092		0.130286		-1.50745	0.847153	0.55588
Q10PZ4	9.11484	8.86759	9.74017	9.91456	9.22122	8.83611	3	3	6			-0.115977	0.216281	0.547591	0.546717	0.0342196	-0.418089		0.135124						-0.251834	0.44988	1.07937	1.0941	0.0690358	-0.856898			-0.251834	0.44988	1.07937	1.0941	0.0690358	-0.856898		0.635385		-0.323726	0.59983	0.659832
Q10PZ6	11.7391	10.8175	10.3175	10.4368	11.2514	10.9912	3	3	6			2.50829	2.16616	1.12495	1.06897	2.06436	1.73697		1.77828						5.44654	4.50577	2.21741	2.13924	4.16471	3.56001			5.44654	4.50577	2.21741	2.13924	4.16471	3.56001		0.563196		-0.768584	0.904642	0.534165
Q10PZ9	5.92391	3.09589	7.25162	7.16932	6.09348	9.87853	3	3	6			-3.3069	-5.55542	-1.94095	-2.19852	-3.09353	0.624324		-2.5785						-7.18065	-11.5557	-3.82585	-4.39973	-6.241	1.27959			-7.18065	-11.5557	-3.82585	-4.39973	-6.241	1.27959		0.988713		4.40035	2.06498	0.238989
Q10Q07	13.2872	8.451	9.62137	12.3528	8.88816	10.4728	3	3	6			4.05641	-0.200302	0.428797	2.98494	-0.29884	1.21859		1.36493						8.80813	-0.416644	0.845211	5.97352	-0.602891	2.49757			8.80813	-0.416644	0.845211	5.97352	-0.602891	2.49757		0.604017		-0.456167	0.149801	0.901375
Q10Q08	10.1729	11.4812	10.4732	10.7476	10.7356	9.98314	3	3	6			0.942115	2.82994	1.28062	1.37976	1.54864	0.728934		1.45167						2.04572	5.88648	2.52426	2.7612	3.12427	1.49399			2.04572	5.88648	2.52426	2.7612	3.12427	1.49399		0.28653		-1.02567	1.07092	0.476016
Q10Q62	13.3197	9.73948	6.11128	8.42861	7.72274	10.544	3	3	6			4.08886	1.08817	-3.0813	-0.939236	-1.46427	1.2898		0.163671						8.8786	2.26348	-6.07361	-1.87962	-2.95406	2.64351			8.8786	2.26348	-6.07361	-1.87962	-2.95406	2.64351		0.27167		-2.41954	0.665319	0.630549
Q10Q65	7.62447	4.43476	9.15393	6.82158	9.95006	6.65249	3	3	6			-1.60635	-4.21655	-0.0386452	-2.54627	0.763055	-2.60172		-1.70774						-3.48804	-8.77073	-0.0761744	-5.09563	1.53941	-5.33237			-3.48804	-8.77073	-0.0761744	-5.09563	1.53941	-5.33237		0.884513		1.14879	0.412136	0.75151
Q10Q99	9.04783	9.15327	10.4861	8.39874	10.6622	8.75722	3	3	6			-0.18298	0.501966	1.29355	-0.969104	1.47522	-0.496979		0.270279						-0.397324	1.04413	2.54975	-1.93939	2.97616	-1.01859			-0.397324	1.04413	2.54975	-1.93939	2.97616	-1.01859		0.482604		-1.05946	0.801373	0.573803
Q10QA2	7.55819	7.77195	8.61835	6.37048	10.4022	7.00854	3	3	6			-1.67262	-0.879356	-0.574228	-2.99737	1.21515	-2.24566		-1.19235						-3.63195	-1.82913	-1.13187	-5.99839	2.4515	-4.60262			-3.63195	-1.82913	-1.13187	-5.99839	2.4515	-4.60262		0.150068		-0.518855	0.221004	0.857968
Q10QH1	8.72479	8.46532	7.72308	9.30179	10.1411	8.80213	3	3	6			-0.506026	-0.185986	-1.4695	-0.0660545	0.95408	-0.452074		-0.287593						-1.09879	-0.386864	-2.89656	-0.132189	1.9248	-0.926552			-1.09879	-0.386864	-2.89656	-0.132189	1.9248	-0.926552		0.871686		1.74942	2.34479	0.196856
Q10QP3	11.022	6.98242	9.15697	11.6995	6.92386	9.32623	3	3	6			1.79114	-1.66888	-0.0356093	2.33168	-2.26314	0.0720248		0.0378682						3.8893	-3.47141	-0.0701903	4.66621	-4.56574	0.147619			3.8893	-3.47141	-0.0701903	4.66621	-4.56574	0.147619		0.778122		-0.0332085	0.0105762	0.992696
Q10QR9	6.50155	9.15914	10.5321	14.3909	14.7108	9.15489	3	3	6			-2.72926	0.507833	1.33949	5.02306	5.5238	-0.0993083		1.59427						-5.92635	1.05633	2.64029	10.0522	11.1439	-0.203538			-5.92635	1.05633	2.64029	10.0522	11.1439	-0.203538		0.692924		7.74078	2.65813	0.158424
Q10QS7	9.16757	4.4706	8.29071	5.50373	7.64068	7.73057	3	3	6			-0.0632439	-4.18071	-0.901867	-3.86412	-1.54633	-1.52363		-2.01332						-0.137329	-8.69618	-1.77769	-7.73295	-3.11961	-3.12277			-0.137329	-8.69618	-1.77769	-7.73295	-3.11961	-3.12277		0.51142		-1.12138	0.452224	0.730915
Q10R93	7.37929	9.23384	11.5357	10.3618	8.82388	6.45761	3	3	6			-1.85152	0.582528	2.34309	0.993986	-0.363128	-2.79659		-0.18194						-4.02041	1.2117	4.61851	1.98918	-0.732588	-5.73178			-4.02041	1.2117	4.61851	1.98918	-0.732588	-5.73178		0.894959		-2.09499	0.813685	0.568927
Q10RB4	8.33784	9.53193	10.0616	9.47913	9.38636	9.30634	3	3	6			-0.892968	0.88062	0.869064	0.111286	0.199353	0.0521328		0.203248						-1.939	1.83176	1.71303	0.222707	0.402182	0.106849			-1.939	1.83176	1.71303	0.222707	0.402182	0.106849		0.0095915		-0.291349	0.258433	0.835996
Q10RE2	11.8176	4.92443	9.30952	10.058	7.75722	7.53683	3	3	6			2.58681	-3.72687	0.116945	0.690144	-1.42978	-1.71737		-0.580022						5.61703	-7.75218	0.230512	1.38113	-2.88449	-3.51986			5.61703	-7.75218	0.230512	1.38113	-2.88449	-3.51986		0.271378		-1.03953	0.293837	0.81573
Q10RI7	9.26285	11.2966	9.93269	8.23735	9.66904	8.32908	3	3	6			0.032034	2.64532	0.74011	-1.13049	0.482039	-0.925124		0.307315						0.0695589	5.50247	1.45885	-2.26237	0.972484	-1.8961			0.0695589	5.50247	1.45885	-2.26237	0.972484	-1.8961		0.56517		-3.40562	2.72347	0.15141
Q10RP4	8.76398	9.43602	6.97281	11.0079	8.85512	16.7329	3	3	6			-0.466837	0.784717	-2.21977	1.64002	-0.331887	7.47871		1.14749						-1.01369	1.63227	-4.37543	3.28204	-0.669561	15.3281			-1.01369	1.63227	-4.37543	3.28204	-0.669561	15.3281		0.230957		7.23246	2.11837	0.230307
Q10RR9	11.2688	10.9879	9.51112	9.14832	9.95614	10.9933	3	3	6			2.03796	2.3366	0.318543	-0.219524	0.769139	1.73909		1.16363						4.42526	4.8603	0.627887	-0.439315	1.55169	3.56437			4.42526	4.8603	0.627887	-0.439315	1.55169	3.56437		0.850122		-1.74557	1.39391	0.380533
Q10RX7	10.4657	9.24177	9.50243	11.1054	9.31064	12.2376	3	3	6			1.23486	0.590462	0.309857	1.73754	0.12363	2.9834		1.16329						2.68138	1.2282	0.610765	3.47719	0.249417	6.11465			2.68138	1.2282	0.610765	3.47719	0.249417	6.11465		0.231587		1.77364	1.39175	0.381102
Q10RZ1	4.60395	8.90875	10.2576	6.69335	7.26303	7.47046	3	3	6			-4.62686	0.257446	1.06505	-2.6745	-1.92397	-1.78375		-1.61443						-10.0468	0.535507	2.09934	-5.35226	-3.88149	-3.6559			-10.0468	0.535507	2.09934	-5.35226	-3.88149	-3.6559		0.0381328		-1.82589	0.555043	0.680637
Q10S27	7.38024	9.51529	8.2817	9.35286	11.0147	7.76679	3	3	6			-1.85057	0.863979	-0.910879	-0.0149878	1.82771	-1.48741		-0.262025						-4.01835	1.79714	-1.79545	-0.029994	3.68729	-3.04853			-4.01835	1.79714	-1.79545	-0.029994	3.68729	-3.04853		0.861354		1.54181	0.779606	0.582526
Q10S72	10.6826	8.05815	5.44248	8.77956	7.94936	10.3534	3	3	6			1.45183	-0.593153	-3.7501	-0.588293	-1.23765	1.09917		-0.603032						3.15252	-1.2338	-7.3919	-1.1773	-2.49687	2.2528			3.15252	-1.2338	-7.3919	-1.1773	-2.49687	2.2528		0.352877		1.3506	0.496011	0.709065
Q10S83	10.909	10.1964	10.7439	10.4408	9.5659	8.97467	3	3	6			1.67818	1.54505	1.55133	1.07292	0.378897	-0.27953		0.991141						3.64402	3.21382	3.05786	2.14714	0.7644	-0.572913			3.64402	3.21382	3.05786	2.14714	0.7644	-0.572913		0.094915		-2.52569	4.84164	0.0348756
Q10S93	10.5062	6.15374	7.93499	8.17323	9.67805	8.62961	3	3	6			1.2754	-2.49756	-1.25759	-1.19462	0.491049	-0.624591		-0.634653						2.76941	-5.19512	-2.47886	-2.3907	0.99066	-1.28014			2.76941	-5.19512	-2.47886	-2.3907	0.99066	-1.28014		0.306826		0.741466	0.3494	0.78491
Q10SC8	9.13999	9.91876	10.8393	9.8171	7.71658	11.346	3	3	6			-0.0908264	1.26745	1.64671	0.449248	-1.47043	2.09181		0.648994						-0.197222	2.6364	3.24586	0.899043	-2.96649	4.2873			-0.197222	2.6364	3.24586	0.899043	-2.96649	4.2873		0.407986		-1.15506	0.624517	0.648637
Q10SM2	7.22342	7.41202	7.21645	3.57821	7.7864	9.33374	3	3	6			-2.00739	-1.23929	-1.97612	-5.78963	-1.4006	0.0795344		-2.05558						-4.35887	-2.57781	-3.89518	-11.5863	-2.82563	0.163011			-4.35887	-2.57781	-3.89518	-11.5863	-2.82563	0.163011		0.0447682		-1.13903	0.361247	0.778491
Q10SM7	7.35226	9.05948	8.06161	7.99073	8.2885	6.65635	3	3	6			-1.87855	0.408173	-1.13096	-1.37712	-0.898508	-2.59785		-1.2458						-4.0791	0.84903	-2.22926	-2.75592	-1.81268	-5.32445			-4.0791	0.84903	-2.22926	-2.75592	-1.81268	-5.32445		0.695375		-1.4779	1.14255	0.45296
Q10SU5	8.43858	8.03315	12.0187	11.7956	7.24165	12.266	3	3	6			-0.792229	-0.618159	2.82614	2.42775	-1.94536	3.01176		0.818318						-1.72025	-1.28582	5.57067	4.85845	-3.92463	6.17279			-1.72025	-1.28582	5.57067	4.85845	-3.92463	6.17279		0.713819		1.514	0.471604	0.721162
Q10SX7	7.81928	8.92481	9.16616	8.81231	11.1712	8.63194	3	3	6			-1.41153	0.273505	-0.0264141	-0.555542	1.98417	-0.622261		-0.059678						-3.06501	0.568912	-0.0520654	-1.11176	4.00294	-1.27536			-3.06501	0.568912	-0.0520654	-1.11176	4.00294	-1.27536		0.590978		1.38799	0.893745	0.538215
Q10T43	13.0072	9.27384	9.91436	10.1389	11.3305	11.3997	3	3	6			3.77641	0.622535	0.721778	0.771064	2.14346	2.14545		1.69678						8.20014	1.29492	1.42271	1.54307	4.3243	4.39723			8.20014	1.29492	1.42271	1.54307	4.3243	4.39723		0.290121		-0.217724	0.0986495	0.933907
Q1AHB2	9.9468	6.93993	9.76911	11.4953	10.7768	9.16012	3	3	6			0.715991	-1.71138	0.576533	2.12741	1.58984	-0.0940788		0.534053						1.55471	-3.55979	1.13642	4.25741	3.2074	-0.19282			1.55471	-3.55979	1.13642	4.25741	3.2074	-0.19282		0.80312		2.71355	1.89091	0.269637
Q1ECF5	8.34314	9.17418	9.58723	8.62073	8.36567	8.68075	3	3	6			-0.887671	0.52287	0.394657	-0.747115	-0.821339	-0.573456		-0.352009						-1.9275	1.08761	0.777916	-1.49514	-1.657	-1.17533			-1.9275	1.08761	0.777916	-1.49514	-1.657	-1.17533		0.0427446		-1.42183	1.86424	0.274667
Q1EHT7	10.4139	8.53916	11.6216	12.0801	10.2684	9.07852	3	3	6			1.18313	-0.112148	2.42902	2.7122	1.08142	-0.175678		1.18632						2.56907	-0.233277	4.78789	5.42771	2.1817	-0.360062			2.56907	-0.233277	4.78789	5.42771	2.1817	-0.360062		0.858651		0.0418897	0.0205878	0.985831
Q1WM15	5.85439	9.12016	6.74551	8.78584	8.00175	10.888	3	3	6			-3.37642	0.468853	-2.44707	-0.582003	-1.18526	1.63378		-0.914686						-7.33159	0.97525	-4.82347	-1.16472	-2.39118	3.34853			-7.33159	0.97525	-4.82347	-1.16472	-2.39118	3.34853		0.669583		3.65748	1.77608	0.291975
Q1WM16	8.34563	7.36623	8.83074	10.2052	10.6707	9.91126	3	3	6			-0.885186	-1.28507	-0.36184	0.837334	1.48365	0.657055		0.0743237						-1.9221	-2.67305	-0.713231	1.67569	2.99317	1.34667			-1.9221	-2.67305	-0.713231	1.67569	2.99317	1.34667		0.874178		3.77464	7.02063	0.00770158
Q1WNZ7	9.17498	9.5141	10.6796	8.0663	9.43962	9.66005	3	3	6			-0.055837	0.862795	1.48699	-1.30154	0.252618	0.405847		0.275145						-0.121245	1.79468	2.93104	-2.60467	0.509641	0.831808			-0.121245	1.79468	2.93104	-2.60467	0.509641	0.831808		0.795667		-1.9559	2.06945	0.238251
Q258Y5	9.82725	8.30428	9.17328	10.5995	10.9698	11.0761	3	3	6			0.596435	-0.347024	-0.0192998	1.23169	1.78281	1.82195		0.844427						1.29511	-0.721837	-0.0380423	2.46489	3.59671	3.73419			1.29511	-0.721837	-0.0380423	2.46489	3.59671	3.73419		0.631191		3.08685	6.31907	0.0125248
Q25AG3	7.50446	6.93133	8.94078	9.63934	7.9305	10.7412	3	3	6			-1.72635	-1.71998	-0.251794	0.271493	-1.2565	1.48701		-0.532687						-3.74862	-3.57769	-0.496316	0.543317	-2.53492	3.04772			-3.74862	-3.57769	-0.496316	0.543317	-2.53492	3.04772		0.599912		2.95958	2.32301	0.19985
Q2F969	9.51852	8.17567	12.1707	11.4176	11.2142	11.8441	3	3	6			0.287703	-0.475633	2.97813	2.04979	2.02719	2.58988		1.57618						0.624721	-0.989352	5.87026	4.10209	4.08973	5.30811			0.624721	-0.989352	5.87026	4.10209	4.08973	5.30811		0.0733721		2.66477	1.86166	0.27516
Q2KNB4	10.2271	7.99175	5.26431	8.39506	7.73586	6.53948	3	3	6			0.996322	-0.659559	-3.92827	-0.972785	-1.45114	-2.71472		-1.45502						2.16343	-1.37193	-7.74309	-1.94676	-2.92759	-5.56398			2.16343	-1.37193	-7.74309	-1.94676	-2.92759	-5.56398		0.243829		-1.16224	0.461581	0.72619
Q2KNB5	6.0766	6.55411	8.67663	10.3342	9.58785	10.2329	3	3	6			-3.15421	-2.09719	-0.51595	0.966314	0.400848	0.978698		-0.570249						-6.84909	-4.36232	-1.017	1.93381	0.808684	2.0059			-6.84909	-4.36232	-1.017	1.93381	0.808684	2.0059		0.0999918		5.65893	5.01379	0.0309527
Q2KNB7	9.28318	8.03034	8.79396	8.58538	6.9798	8.55294	3	3	6			0.0523684	-0.620971	-0.398616	-0.782472	-2.20721	-0.701264		-0.776361						0.113713	-1.29167	-0.785721	-1.5659	-4.4529	-1.43728			0.113713	-1.29167	-0.785721	-1.5659	-4.4529	-1.43728		0.296803		-1.8308	2.63241	0.161274
Q2KNB9	10.6821	9.33514	10.9735	10.5101	9.38537	10.05	3	3	6			1.4513	0.683838	1.7809	1.14222	0.198361	0.795782		1.00874						3.15138	1.42243	3.51038	2.28584	0.400181	1.631			3.15138	1.42243	3.51038	2.28584	0.400181	1.631		0.847562		-1.25572	2.22939	0.21325
Q2NND9	8.82947	8.837	8.77179	10.7124	9.3187	9.79638	3	3	6			-0.401344	0.18569	-0.420791	1.34459	0.131696	0.542178		0.230337						-0.871482	0.386249	-0.829429	2.69083	0.265688	1.11123			-0.871482	0.386249	-0.829429	2.69083	0.265688	1.11123		0.503836		1.79413	3.40544	0.0943757
Q2NNE0	10.7378	9.31386	8.57701	10.5729	8.78571	9.29165	3	3	6			1.50694	0.662551	-0.615564	1.20504	-0.401291	0.0374518		0.399189						3.27219	1.37816	-1.21335	2.41155	-0.809579	0.0767598			3.27219	1.37816	-1.21335	2.41155	-0.809579	0.0767598		0.706377		-0.586088	0.443642	0.735276
Q2QLI6	8.62227	10.1655	14.0507	9.88661	11.1933	10.7717	3	3	6			-0.608541	1.51423	4.85812	0.518763	2.00627	1.51745		1.63438						-1.32139	3.14971	9.57595	1.03816	4.04753	3.11011			-1.32139	3.14971	9.57595	1.03816	4.04753	3.11011		0.146479		-1.06949	0.39387	0.761085
Q2QLV9	9.25923	8.3435	8.27738	8.84546	8.9851	8.62264	3	3	6			0.0284128	-0.30781	-0.915197	-0.522389	-0.201903	-0.631565		-0.425075						0.0616959	-0.640269	-1.80396	-1.04542	-0.407327	-1.29443			0.0616959	-0.640269	-1.80396	-1.04542	-0.407327	-1.29443		0.381582		-0.121545	0.233573	0.850526
Q2QLY4	10.6224	9.92825	9.62441	11.2711	10.833	11.1873	3	3	6			1.39161	1.27694	0.431834	1.90326	1.64596	1.93309		1.43045						3.02175	2.65614	0.851198	3.80885	3.32063	3.96198			3.02175	2.65614	0.851198	3.80885	3.32063	3.96198		0.153407		1.52079	3.3966	0.094956
Q2QM00	8.29108	8.77703	8.30538	10.7933	7.39472	8.88142	3	3	6			-0.939734	0.125718	-0.887199	1.42543	-1.79229	-0.372782		-0.406809						-2.04055	0.261503	-1.74878	2.8526	-3.61582	-0.76404			-2.04055	0.261503	-1.74878	2.8526	-3.61582	-0.76404		0.260098		0.666854	0.402911	0.75633
Q2QM47	8.53477	9.44828	10.5579	10.4521	8.40386	8.07494	3	3	6			-0.696043	0.796974	1.36537	1.08429	-0.783141	-1.17926		0.0980313						-1.5114	1.65777	2.6913	2.1699	-1.57994	-2.41696			-1.5114	1.65777	2.6913	2.1699	-1.57994	-2.41696		0.891185		-1.55489	1.12722	0.457798
Q2QM55	10.4088	8.11306	8.9263	10.1519	7.8635	9.50716	3	3	6			1.17794	-0.538242	-0.266281	0.784057	-1.3235	0.252958		0.0144888						2.5578	-1.11958	-0.524872	1.56907	-2.67008	0.518452			2.5578	-1.11958	-0.524872	1.56907	-2.67008	0.518452		0.888614		-0.498631	0.349115	0.785065
Q2QM62	10.3626	11.6386	10.7731	11.9323	10.8254	10.11	3	3	6			1.13179	2.98726	1.58056	2.56448	1.63835	0.855759		1.79303						2.45758	6.21374	3.11548	5.13208	3.30527	1.75393			2.45758	6.21374	3.11548	5.13208	3.30527	1.75393		0.830859		-0.531839	0.428159	0.74321
Q2QM84	9.98456	10.3722	9.9737	9.29868	10.2677	11.1872	3	3	6			0.753748	1.72091	0.78112	-0.0691666	1.08072	1.93303		1.03339						1.6367	3.57961	1.53968	-0.138418	2.18028	3.96185			1.6367	3.57961	1.53968	-0.138418	2.18028	3.96185		0.477098		-0.25076	0.213043	0.862715
Q2QMG2	9.43388	9.70266	9.27738	10.3882	10.1934	11.4721	3	3	6			0.203065	1.05135	0.0848032	1.02038	1.0064	2.21788		0.930647						0.440938	2.18689	0.167157	2.04201	2.03034	4.54568			0.440938	2.18689	0.167157	2.04201	2.03034	4.54568		0.727611		1.94102	2.85867	0.137865
Q2QMH2	10.0841	10.3493	10.0743	8.94921	11.0724	9.79012	3	3	6			0.853331	1.69797	0.881698	-0.418634	1.8854	0.535918		0.905947						1.85293	3.53192	1.73793	-0.837778	3.80366	1.0984			1.85293	3.53192	1.73793	-0.837778	3.80366	1.0984		0.313008		-1.0195	0.929746	0.524951
Q2QMI0	9.6911	9.98499	9.48625	8.09882	10.5958	8.80148	3	3	6			0.460285	1.33368	0.293675	-1.26903	1.40881	-0.45272		0.295784						0.999469	2.77416	0.578868	-2.5396	2.84219	-0.927877			0.999469	2.77416	0.578868	-2.5396	2.84219	-0.927877		0.302139		-1.65926	1.35104	0.392008
Q2QMT2	10.6461	10.7215	9.1226	11.4087	9.58395	9.78313	3	3	6			1.4153	2.07022	-0.0699821	2.04085	0.396943	0.528927		1.06371						3.07319	4.30621	-0.137943	4.08419	0.800806	1.08407			3.07319	4.30621	-0.137943	4.08419	0.800806	1.08407		0.772167		-0.424131	0.296428	0.814266
Q2QMT5	8.45861	7.09318	8.87774	9.41141	10.0041	9.94927	3	3	6			-0.772201	-1.55813	-0.314833	0.0435572	0.817075	0.69507		-0.181577						-1.67677	-3.24102	-0.620574	0.0871675	1.6484	1.42459			-1.67677	-3.24102	-0.620574	0.0871675	1.6484	1.42459		0.581584		2.8995	4.9366	0.032654
Q2QMT6	11.4457	9.07796	11.3391	11.7403	9.91103	9.84901	3	3	6			2.21493	0.426657	2.14655	2.37244	0.724027	0.594812		1.41324						4.80952	0.887479	4.23111	4.74777	1.46068	1.2191			4.80952	0.887479	4.23111	4.74777	1.46068	1.2191		0.928662		-0.833518	0.635004	0.643939
Q2QMT7	10.1101	8.72659	10.3079	6.18579	9.78991	11.3686	3	3	6			0.879279	0.0752857	1.11531	-3.18206	0.602904	2.11441		0.267521						1.90928	0.1566	2.1984	-6.368	1.21632	4.33362			1.90928	0.1566	2.1984	-6.368	1.21632	4.33362		0.077471		-1.69412	0.669322	0.628802
Q2QMX9	10.6177	8.88179	15.2757	10.9251	9.37175	12.0497	3	3	6			1.38693	0.23048	6.08311	1.55726	0.18475	2.79554		2.03968						3.0116	0.479416	11.9905	3.11642	0.372721	5.72963			3.0116	0.479416	11.9905	3.11642	0.372721	5.72963		0.327909		-2.08759	0.704308	0.613737
Q2QN30	10.8052	6.48125	8.28942	11.7487	9.23589	10.9018	3	3	6			1.57437	-2.17006	-0.903158	2.38081	0.0488896	1.64757		0.429736						3.4186	-4.51388	-1.78023	4.76452	0.0986315	3.37679			3.4186	-4.51388	-1.78023	4.76452	0.0986315	3.37679		0.522381		3.70515	2.04177	0.242865
Q2QN36	9.13186	8.94055	9.71594	9.54086	9.19244	9.23477	3	3	6			-0.0989556	0.289241	0.523368	0.173016	0.00543577	-0.0194328		0.145445						-0.214873	0.601644	1.03162	0.346244	0.0109663	-0.0398288			-0.214873	0.601644	1.03162	0.346244	0.0109663	-0.0398288		0.197831		-0.367003	1.34173	0.394547
Q2QNC3	8.79844	8.39352	8.03661	8.61324	8.5775	8.06393	3	3	6			-0.432373	-0.257788	-1.15596	-0.754611	-0.609501	-1.19027		-0.733417						-0.93886	-0.536218	-2.27854	-1.51014	-1.22963	-2.43953			-0.93886	-0.536218	-2.27854	-1.51014	-1.22963	-2.43953		0.650449		-0.475224	1.00083	0.499711
Q2QNM1	12.2189	10.6127	10.834	11.403	10.4587	11.4278	3	3	6			2.98808	1.96138	1.64142	2.03516	1.27171	2.17363		2.0119						6.48836	4.07981	3.23544	4.07281	2.56559	4.45499			6.48836	4.07981	3.23544	4.07281	2.56559	4.45499		0.518785		-0.903405	1.09022	0.469689
Q2QNM3	9.8829	9.51314	10.5258	7.82152	11.1909	10.6855	3	3	6			0.65209	0.861828	1.33324	-1.54633	2.00387	1.43133		0.789338						1.41596	1.79267	2.62797	-3.09454	4.04268	2.93361			1.41596	1.79267	2.62797	-3.09454	4.04268	2.93361		0.0508412		-0.651619	0.347108	0.786158
Q2QNS6	11.9127	9.22774	11.8074	11.2983	12.4422	11.4214	3	3	6			2.68185	0.576429	2.61478	1.9305	3.25524	2.16718		2.20433						5.82341	1.19902	5.15404	3.86336	6.56723	4.44176			5.82341	1.19902	5.15404	3.86336	6.56723	4.44176		0.49007		0.898629	0.696327	0.617141
Q2QNU0	11.4093	10.5702	11.0739	11.2435	10.6098	11.487	3	3	6			2.17853	1.91893	1.88136	1.87562	1.42282	2.23283		1.91835						4.73048	3.99152	3.7084	3.75353	2.87045	4.57633			4.73048	3.99152	3.7084	3.75353	2.87045	4.57633		0.553477		-0.410026	0.948866	0.518039
Q2QP54	9.6978	11.4822	11.6584	10.7271	9.82329	10.2324	3	3	6			0.466989	2.83085	2.46586	1.35922	0.636283	0.978219		1.45624						1.01403	5.88837	4.8605	2.7201	1.28366	2.00492			1.01403	5.88837	4.8605	2.7201	1.28366	2.00492		0.144947		-1.91808	1.83133	0.281006
Q2QPW1	8.76378	10.6972	9.74858	11.851	8.96235	9.42681	3	3	6			-0.467036	2.04592	0.556001	2.48316	-0.224658	0.172607		0.760999						-1.01413	4.25567	1.09595	4.96935	-0.453234	0.353769			-1.01413	4.25567	1.09595	4.96935	-0.453234	0.353769		0.902186		0.177464	0.086667	0.941696
Q2QPW2	8.39305	7.6681	9.39015	8.44919	9.03419	8.13453	3	3	6			-0.837765	-0.983202	0.19757	-0.918658	-0.152811	-1.11967		-0.635757						-1.81913	-2.04514	0.389435	-1.83844	-0.308287	-2.29484			-1.81913	-2.04514	0.389435	-1.83844	-0.308287	-2.29484		0.748736		-0.322242	0.397411	0.759219
Q2QQ96	12.1638	8.10439	9.25113	9.68017	9.08725	7.94375	3	3	6			2.93296	-0.546918	0.0585501	0.312318	-0.0997543	-1.31046		0.22445						6.36867	-1.13763	0.115409	0.625017	-0.201248	-2.68586			6.36867	-1.13763	0.115409	0.625017	-0.201248	-2.68586		0.31032		-2.53618	1.42607	0.372144
Q2QQJ5	10.9424	9.73589	10.6422	11.1532	10.4629	8.95968	3	3	6			1.71156	1.08459	1.44966	1.78532	1.27591	-0.294519		1.16875						3.71649	2.25602	2.85745	3.57282	2.57406	-0.603635			3.71649	2.25602	2.85745	3.57282	2.57406	-0.603635		0.203498		-1.09557	1.13317	0.455912
Q2QQR2	9.41132	9.25072	9.88663	9.92278	5.94317	8.62384	3	3	6			0.180508	0.599418	0.694049	0.55493	-3.24383	-0.630357		-0.307548						0.391957	1.24683	1.36805	1.11054	-6.54423	-1.29196			0.391957	1.24683	1.36805	1.11054	-6.54423	-1.29196		0.0362679		-3.24416	1.8022	0.286737
Q2QQS5	11.2434	10.2561	11.0713	9.89833	11.0857	10.819	3	3	6			2.01254	1.60478	1.87875	0.530481	1.89873	1.56478		1.58168						4.37005	3.33807	3.70325	1.06161	3.83057	3.20711			4.37005	3.33807	3.70325	1.06161	3.83057	3.20711		0.229754		-1.10403	1.81998	0.283226
Q2QQX6	11.4678	10.8723	11.2219	10.8342	9.47695	10.9789	3	3	6			2.23695	2.22098	2.02937	1.46639	0.289944	1.72472		1.66139						4.85733	4.61981	4.00014	2.93456	0.584943	3.53492			4.85733	4.61981	4.00014	2.93456	0.584943	3.53492		0.149148		-2.14095	3.57297	0.0840289
Q2QRN7	11.818	9.31311	10.9478	9.82644	9.14698	10.2973	3	3	6			2.58721	0.661803	1.75521	0.458589	-0.0400291	1.04306		1.07764						5.6179	1.3766	3.45972	0.917738	-0.0807561	2.13781			5.6179	1.3766	3.45972	0.917738	-0.0807561	2.13781		0.430758		-2.49314	2.77969	0.145623
Q2QRV3	9.35506	10.5467	8.79773	10.1657	11.0609	11.2927	3	3	6			0.124252	1.89539	-0.394851	0.797813	1.87389	2.03852		1.05584						0.269803	3.94256	-0.778299	1.5966	3.78046	4.17807			0.269803	3.94256	-0.778299	1.5966	3.78046	4.17807		0.478333		2.04035	1.82826	0.281605
Q2QRX6	11.5728	9.30638	8.07655	10.8131	9.65465	7.507	3	3	6			2.34203	0.655074	-1.11603	1.44529	0.467649	-1.7472		0.341136						5.08551	1.3626	-2.19983	2.89235	0.943452	-3.58099			5.08551	1.3626	-2.19983	2.89235	0.943452	-3.58099		0.907721		-1.33116	0.590031	0.664329
Q2QS14	9.79761	8.58402	9.44987	8.03914	11.5948	9.94155	3	3	6			0.5668	-0.0672842	0.257294	-1.32871	2.40779	0.687344		0.420538						1.23076	-0.139956	0.507157	-2.65904	4.85755	1.40875			1.23076	-0.139956	0.507157	-2.65904	4.85755	1.40875		0.0642926		0.66977	0.364453	0.776763
Q2QS71	7.93227	8.77126	8.98874	8.97097	9.30634	8.94536	3	3	6			-1.29854	0.119951	-0.203836	-0.396879	0.11933	-0.308846		-0.328136						-2.81966	0.249508	-0.401785	-0.794242	0.240741	-0.632999			-2.81966	0.249508	-0.401785	-0.794242	0.240741	-0.632999		0.212027		0.595146	0.787865	0.579201
Q2QSL4	9.06883	8.38211	11.7301	10.4533	8.98157	9.46681	3	3	6			-0.161981	-0.269202	2.53755	1.08542	-0.205438	0.212608		0.533161						-0.351727	-0.55996	5.00182	2.17217	-0.414457	0.435753			-0.351727	-0.55996	5.00182	2.17217	-0.414457	0.435753		0.29768		-0.632224	0.387086	0.764673
Q2QSR8	7.75749	9.19704	10.1604	9.50361	9.11543	8.45278	3	3	6			-1.47332	0.545738	0.967798	0.135759	-0.0715711	-0.801426		-0.116171						-3.19919	1.13518	1.90765	0.271684	-0.14439	-1.64257			-3.19919	1.13518	1.90765	0.271684	-0.14439	-1.64257		0.235988		-0.45297	0.317996	0.802184
Q2QT65	7.33932	6.21876	7.22497	10.7534	10.6611	7.52583	3	3	6			-1.8915	-2.43255	-1.96761	1.38554	1.47406	-1.72837		-0.860071						-4.10722	-5.05988	-3.8784	2.77276	2.97382	-3.54239			-4.10722	-5.05988	-3.8784	2.77276	2.97382	-3.54239		0.055602		5.08323	3.65953	0.0791355
Q2QTC2	11.5017	10.9826	7.93876	10.1591	10.2884	10.9921	3	3	6			2.27088	2.33126	-1.25382	0.791267	1.1014	1.73789		1.16314						4.93101	4.8492	-2.47143	1.5835	2.222	3.5619			4.93101	4.8492	-2.47143	1.5835	2.222	3.5619		0.106838		0.0195449	0.00840893	0.994188
Q2QTL0	9.70926	9.28889	8.80022	9.18698	7.21364	9.03867	3	3	6			0.478444	0.637582	-0.392357	-0.180867	-1.97337	-0.21553		-0.274349						1.0389	1.32622	-0.773383	-0.361955	-3.98114	-0.441742			1.0389	1.32622	-0.773383	-0.361955	-3.98114	-0.441742		0.46548		-2.12552	2.36789	0.193729
Q2QTY2	9.96473	9.80009	8.24541	8.15421	8.34616	10.0093	3	3	6			0.733918	1.14878	-0.947167	-1.21364	-0.840846	0.755066		-0.060647						1.59364	2.38956	-1.86698	-2.42875	-1.69635	1.54755			1.59364	2.38956	-1.86698	-2.42875	-1.69635	1.54755		0.933033		-1.56459	1.21378	0.431139
Q2QUC5	7.75602	9.64479	10.4942	8.35032	8.85269	9.56077	3	3	6			-1.47479	0.993487	1.30158	-1.01753	-0.334319	0.30657		-0.0375004						-3.20238	2.06653	2.56557	-2.0363	-0.674468	0.628333			-3.20238	2.06653	2.56557	-2.0363	-0.674468	0.628333		0.296173		-1.17072	0.762268	0.589569
Q2QUP1	9.48186	7.71582	8.63815	9.94581	8.60333	11.5558	3	3	6			0.251047	-0.935482	-0.554431	0.577962	-0.583675	2.30159		0.176168						0.545127	-1.94587	-1.09285	1.15663	-1.17753	4.71724			0.545127	-1.94587	-1.09285	1.15663	-1.17753	4.71724		0.307751		2.39664	1.90104	0.26775
Q2QUS0	8.03892	8.67758	10.0367	9.26777	7.66832	9.37445	3	3	6			-1.19189	0.0262716	0.844146	-0.100078	-1.51869	0.12025		-0.303332						-2.58809	0.0546469	1.66391	-0.200278	-3.06385	0.24646			-2.58809	0.0546469	1.66391	-0.200278	-3.06385	0.24646		0.823541		-0.716047	0.55508	0.680619
Q2QV81	12.0664	10.2066	10.7692	12.127	10.5165	9.8393	3	3	6			2.83561	1.55534	1.5766	2.75918	1.32948	0.585096		1.77355						6.15728	3.23523	3.10767	5.52172	2.68215	1.19919			6.15728	3.23523	3.10767	5.52172	2.68215	1.19919		0.763003		-1.03237	0.84464	0.55685
Q2QV94	12.7019	7.36168	8.65785	11.7495	11.6482	9.00461	3	3	6			3.4711	-1.28963	-0.534723	2.38164	2.46117	-0.249589		1.04						7.53719	-2.68252	-1.054	4.76619	4.96526	-0.511547			7.53719	-2.68252	-1.054	4.76619	4.96526	-0.511547		0.484852		1.80641	0.630529	0.64594
Q2QVG8	10.5644	8.45976	11.1248	10.3031	10.5661	10.5842	3	3	6			1.33362	-0.191548	1.93225	0.935248	1.37905	1.33001		1.11977						2.89584	-0.398434	3.80871	1.87164	2.78214	2.72593			2.89584	-0.398434	3.80871	1.87164	2.78214	2.72593		0.100945		0.357864	0.324775	0.798423
Q2QVG9	7.78784	6.46202	8.57633	11.2466	10.9427	11.2045	3	3	6			-1.44298	-2.18929	-0.616244	1.87877	1.75573	1.95031		0.222717						-3.13329	-4.55388	-1.21469	3.75984	3.54207	3.99727			-3.13329	-4.55388	-1.21469	3.75984	3.54207	3.99727		0.036247		6.73368	5.75476	0.0185202
Q2QVI1	10.6423	7.98823	10.9699	11.0238	10.5542	7.57463	3	3	6			1.41151	-0.663077	1.77731	1.65598	1.3672	-1.67957		0.644892						3.06497	-1.37925	3.5033	3.31397	2.75824	-3.44238			3.06497	-1.37925	3.5033	3.31397	2.75824	-3.44238		0.683102		-0.853064	0.38605	0.765222
Q2QWE3	8.43008	8.76769	9.27286	10.9321	10.0682	7.42324	3	3	6			-0.800736	0.116381	0.0802858	1.56422	0.881236	-1.83096		0.00173748						-1.73873	0.242081	0.158253	3.13035	1.77784	-3.75266			-1.73873	0.242081	0.158253	3.13035	1.77784	-3.75266		0.172449		0.831305	0.463897	0.725025
Q2QWK1	8.02231	6.90352	10.4413	8.77857	11.1139	7.55919	3	3	6			-1.2085	-1.74779	1.24871	-0.589278	1.92687	-1.69502		-0.344168						-2.62415	-3.63553	2.46135	-1.17927	3.88733	-3.47404			-2.62415	-3.63553	2.46135	-1.17927	3.88733	-3.47404		0.858771		1.01078	0.428131	0.743224
Q2QWK9	7.6893	9.31703	7.02314	10.8044	9.77956	9.97556	3	3	6			-1.54151	0.665721	-2.16943	1.43653	0.59255	0.721359		-0.0491318						-3.34726	1.38475	-4.27621	2.8748	1.19543	1.47847			-3.34726	1.38475	-4.27621	2.8748	1.19543	1.47847		0.161264		3.92914	3.35032	0.0980512
Q2QWW7	10.6902	10.4808	7.93617	10.7596	9.31583	10.319	3	3	6			1.45936	1.82948	-1.25641	1.39179	0.128824	1.06479		0.76964						3.16887	3.80546	-2.47654	2.78528	0.259894	2.18236			3.16887	3.80546	-2.47654	2.78528	0.259894	2.18236		0.254013		0.243243	0.128396	0.914848
Q2QWX8	9.25359	5.80243	7.86827	6.27797	5.95833	7.83876	3	3	6			0.0227749	-2.84888	-1.32431	-3.08988	-3.22867	-1.41544		-1.98074						0.0494538	-5.92589	-2.61038	-6.18353	-6.51364	-2.90103			0.0494538	-5.92589	-2.61038	-6.18353	-6.51364	-2.90103		0.616027		-2.37046	1.65477	0.317587
Q2QX01	7.8173	8.76898	10.688	8.85944	9.26744	7.26828	3	3	6			-1.41351	0.117671	1.49541	-0.508406	0.0804372	-1.98592		-0.369052						-3.06931	0.244765	2.94764	-1.01743	0.162277	-4.07026			-3.06931	0.244765	2.94764	-1.01743	0.162277	-4.07026		0.688799		-1.68283	1.06696	0.477325
Q2QX40	10.2431	10.8695	10.067	9.77396	10.1923	9.45876	3	3	6			1.01224	2.21821	0.874454	0.406116	1.00529	0.204553		0.953477						2.198	4.61404	1.72365	0.812726	2.0281	0.419243			2.198	4.61404	1.72365	0.812726	2.0281	0.419243		0.452904		-1.75854	2.65279	0.159013
Q2QX45	6.31613	7.52223	8.07692	10.6242	4.23917	8.31999	3	3	6			-2.91468	-1.12908	-1.11565	1.2564	-4.94784	-0.934214		-1.63084						-6.32898	-2.34857	-2.19909	2.51433	-9.98194	-1.91473			-6.32898	-2.34857	-2.19909	2.51433	-9.98194	-1.91473		0.240504		0.498101	0.144752	0.904535
Q2QXB2	10.3226	6.77136	7.93999	9.87467	8.5856	10.7663	3	3	6			1.09179	-1.87995	-1.25259	0.506826	-0.601404	1.51208		-0.103874						2.37073	-3.91044	-2.469	1.01427	-1.21329	3.09909			2.37073	-3.91044	-2.469	1.01427	-1.21329	3.09909		0.601024		2.30293	1.44236	0.367966
Q2QXB3	10.1295	3.15565	7.02004	8.41121	10.5513	10.9599	3	3	6			0.898728	-5.49566	-2.17254	-0.956633	1.36432	1.70573		-0.776009						1.95151	-11.4314	-4.28234	-1.91443	2.75243	3.49599			1.95151	-11.4314	-4.28234	-1.91443	2.75243	3.49599		0.321852		6.03207	2.14447	0.226178
Q2QXC6	9.27118	9.47662	7.70141	8.46213	12.0577	9.22542	3	3	6			0.0403703	0.825318	-1.49117	-0.905714	2.87072	-0.028778		0.218458						0.0876605	1.71672	-2.93927	-1.81253	5.79148	-0.0589823			0.0876605	1.71672	-2.93927	-1.81253	5.79148	-0.0589823		0.520834		1.68495	0.829584	0.562691
Q2QXL0	11.7365	7.49362	8.92926	12.2268	9.1574	10.0285	3	3	6			2.50572	-1.15769	-0.263319	2.85893	-0.0296075	0.774256		0.78138						5.44094	-2.40809	-0.519033	5.72134	-0.0597313	1.58688			5.44094	-2.40809	-0.519033	5.72134	-0.0597313	1.58688		0.69159		1.57822	0.694216	0.618045
Q2QXM3	8.70165	9.71581	10.5985	8.25937	5.55376	6.25015	3	3	6			-0.52916	1.0645	1.40594	-1.10848	-3.63325	-3.00406		-0.967417						-1.14902	2.21424	2.77128	-2.21831	-7.32984	-6.15699			-1.14902	2.21424	2.77128	-2.21831	-7.32984	-6.15699		0.771083		-6.51388	5.06612	0.0298501
Q2QXP0	11.0119	9.9424	13.8744	12.9034	12.8256	12.7043	3	3	6			1.78104	1.29109	4.68183	3.53558	3.63859	3.45013		3.06304						3.86738	2.68557	9.22845	7.07547	7.34062	7.07126			3.86738	2.68557	9.22845	7.07547	7.34062	7.07126		0.00390965		1.90199	1.16964	0.444532
Q2QXY1	11.4674	7.06738	11.9982	12.4615	11.2277	10.5779	3	3	6			2.23654	-1.58393	2.80559	3.09361	2.04067	1.3237		1.6527						4.85645	-3.29469	5.53016	6.19098	4.11692	2.713			4.85645	-3.29469	5.53016	6.19098	4.11692	2.713		0.225192		1.97633	0.869411	0.54737
Q2QY04	9.21927	10.364	9.90001	10.3713	14.5065	10.5616	3	3	6			-0.0115472	1.71272	0.707429	1.00349	5.31949	1.30737		1.67316						-0.0250738	3.56258	1.39443	2.00821	10.7317	2.67954			-0.0250738	3.56258	1.39443	2.00821	10.7317	2.67954		0.243356		3.49584	1.70218	0.307322
Q2QY12	8.55674	6.8485	10.8139	8.84153	9.67978	10.1742	3	3	6			-0.674077	-1.80281	1.62128	-0.526315	0.492774	0.919974		0.00513861						-1.4637	-3.74998	3.19575	-1.05327	0.99414	1.88554			-1.4637	-3.74998	3.19575	-1.05327	0.99414	1.88554		0.306814		1.28145	0.749277	0.594902
Q2QY53	5.69502	8.39934	9.49805	6.9241	11.9213	11.2701	3	3	6			-3.53579	-0.251965	0.305474	-2.44375	2.73428	2.01592		-0.195973						-7.67766	-0.524107	0.602127	-4.89048	5.51623	4.13174			-7.67766	-0.524107	0.602127	-4.89048	5.51623	4.13174		0.774098		4.11905	1.40006	0.378914
Q2QYE1	8.70957	7.60711	10.4019	7.71624	7.61728	9.30524	3	3	6			-0.521246	-1.0442	1.20937	-1.65161	-1.56972	0.0510386		-0.587728						-1.13184	-2.17201	2.38381	-3.30524	-3.16681	0.104607			-1.13184	-2.17201	2.38381	-3.30524	-3.16681	0.104607		0.790454		-1.8158	1.4599	0.363518
Q2QYH7	10.65	5.52347	8.85611	7.68895	8.50263	13.2333	3	3	6			1.41916	-3.12784	-0.336463	-1.6789	-0.684372	3.97913		-0.0715463						3.08159	-6.50614	-0.663209	-3.35984	-1.38068	8.15547			3.08159	-6.50614	-0.663209	-3.35984	-1.38068	8.15547		0.762289		2.50091	0.714461	0.609433
Q2QYL3	9.80834	9.35074	7.35746	8.16194	8.77679	8.45232	3	3	6			0.577524	0.699433	-1.83511	-1.20591	-0.41021	-0.801879		-0.496026						1.25404	1.45487	-3.61723	-2.41329	-0.827573	-1.6435			1.25404	1.45487	-3.61723	-2.41329	-0.827573	-1.6435		0.141652		-1.32535	1.04684	0.484027
Q2QYM3	10.8248	11.2714	10.9124	14.4033	10.1097	9.68008	3	3	6			1.59399	2.6201	1.71979	5.03543	0.922695	0.425876		2.05298						3.4612	5.45	3.38991	10.077	1.86148	0.872858			3.4612	5.45	3.38991	10.077	1.86148	0.872858		0.10167		0.170074	0.0627606	0.95743
Q2QYR1	6.79429	8.3112	8.95989	9.62445	9.38608	10.9193	3	3	6			-2.43653	-0.340104	-0.232691	0.2566	0.199073	1.66511		-0.14809						-5.2907	-0.707442	-0.458662	0.513514	0.401617	3.41274			-5.2907	-0.707442	-0.458662	0.513514	0.401617	3.41274		0.564924		3.59489	3.00476	0.124589
Q2QYR5	8.57815	9.49619	9.26296	9.7539	7.3972	3.80126	3	3	6			-0.652666	0.844888	0.0703868	0.386054	-1.7898	-5.45294		-1.09901						-1.41721	1.75743	0.138741	0.772579	-3.61081	-11.1761			-1.41721	1.75743	0.138741	0.772579	-3.61081	-11.1761		0.129039		-4.83111	1.9907	0.251617
Q2QYU2	6.74658	10.6389	9.89665	8.30665	10.6161	8.52231	3	3	6			-2.48423	1.98758	0.704073	-1.06119	1.42908	-0.731895		-0.0260969						-5.39429	4.13432	1.38781	-2.12368	2.88309	-1.50006			-5.39429	4.13432	1.38781	-2.12368	2.88309	-1.50006		0.472676		-0.289501	0.0998883	0.933105
Q2QYW5	9.16689	8.25366	6.79077	9.07505	9.68164	10.6817	3	3	6			-0.0639214	-0.397649	-2.40181	-0.292797	0.494638	1.42748		-0.205677						-0.1388	-0.827139	-4.73425	-0.58595	0.997899	2.9257			-0.1388	-0.827139	-4.73425	-0.58595	0.997899	2.9257		0.669744		3.01261	2.63383	0.161116
Q2QYY8	11.1984	9.05989	10.4354	11.4562	10.3977	8.69558	3	3	6			1.96757	0.408578	1.24278	2.08835	1.21067	-0.558626		1.05989						4.27241	0.849873	2.44967	4.17925	2.44245	-1.14494			4.27241	0.849873	2.44967	4.17925	2.44245	-1.14494		0.569172		-0.698397	0.463075	0.725439
Q2QZ37	8.30638	9.24184	8.33204	11.1481	8.09138	8.3194	3	3	6			-0.924432	0.590533	-0.860541	1.78025	-1.09562	-0.934801		-0.240769						-2.00732	1.22835	-1.69623	3.56267	-2.21035	-1.91593			-2.00732	1.22835	-1.69623	3.56267	-2.21035	-1.91593		0.46323		0.637195	0.356857	0.780864
Q2QZ86	6.75916	9.98499	9.02228	6.97854	7.17842	8.6536	3	3	6			-2.47166	1.33368	-0.170293	-2.38931	-2.00859	-0.600605		-1.05113						-5.36698	2.77416	-0.335667	-4.78153	-4.0522	-1.23098			-5.36698	2.77416	-0.335667	-4.78153	-4.0522	-1.23098		0.344843		-2.37874	1.27509	0.413198
Q2QZF1	11.1007	8.53865	12.6627	10.1595	9.52174	11.0543	3	3	6			1.86992	-0.112653	3.47011	0.791645	0.334733	1.80013		1.35898						4.06036	-0.234326	6.84001	1.58426	0.675302	3.68948			4.06036	-0.234326	6.84001	1.58426	0.675302	3.68948		0.316769		-1.57234	0.938035	0.521943
Q2QZF2	10.2717	10.2897	11.1896	11.6036	11.6337	11.4663	3	3	6			1.04088	1.63837	1.99706	2.23573	2.44667	2.21208		1.92847						2.26019	3.40793	3.93645	4.47419	4.936	4.53379			2.26019	3.40793	3.93645	4.47419	4.936	4.53379		0.158241		1.44647	4.36463	0.0485419
Q2QZL4	10.2654	7.94585	8.70311	8.08762	8.13242	8.74893	3	3	6			1.03457	-0.705454	-0.48947	-1.28023	-1.05458	-0.505272		-0.500073						2.24647	-1.4674	-0.964804	-2.56201	-2.12755	-1.03558			2.24647	-1.4674	-0.964804	-2.56201	-2.12755	-1.03558		0.264431		-1.84647	2.22895	0.213313
Q2R0D1	6.79909	7.98482	8.75589	8.06738	9.22441	9.94821	3	3	6			-2.43173	-0.66649	-0.436688	-1.30047	0.0374067	0.694004		-0.683993						-5.28028	-1.38635	-0.860765	-2.60252	0.0754657	1.4224			-5.28028	-1.38635	-0.860765	-2.60252	0.0754657	1.4224		0.83734		2.14091	1.70575	0.306562
Q2R0D2	8.83558	8.39656	8.69599	10.6001	7.88929	8.40744	3	3	6			-0.395236	-0.254745	-0.496583	1.23225	-1.29771	-0.846765		-0.343132						-0.85822	-0.529889	-0.978826	2.466	-2.61805	-1.73549			-0.85822	-0.529889	-0.978826	2.466	-2.61805	-1.73549		0.0145233		0.159797	0.10736	0.928285
Q2R0Q1	10.4359	10.0377	10.5467	11.0425	8.36115	8.3072	3	3	6			1.20507	1.38638	1.35412	1.6747	-0.825851	-0.947002		0.641236						2.61669	2.88377	2.66914	3.35144	-1.6661	-1.94094			2.61669	2.88377	2.66914	3.35144	-1.6661	-1.94094		0.00450142		-2.8084	2.03533	0.243953
Q2R114	10.9358	10.1932	7.53426	9.981	8.12065	9.02489	3	3	6			1.70494	1.54185	-1.65831	0.613149	-1.06635	-0.229312		0.150994						3.70213	3.20716	-3.26874	1.22704	-2.1513	-0.469989			3.70213	3.20716	-3.26874	1.22704	-2.1513	-0.469989		0.317344		-1.67827	0.914024	0.530703
Q2R185	10.1173	8.252	9.46695	8.62084	8.87661	10.8808	3	3	6			0.886441	-0.399304	0.274376	-0.747005	-0.310396	1.62661		0.221786						1.92483	-0.830583	0.540829	-1.49492	-0.626204	3.33383			1.92483	-0.830583	0.540829	-1.49492	-0.626204	3.33383		0.44537		-0.140791	0.0931922	0.937446
Q2R1D5	8.98428	10.8033	10.811	9.59619	8.67253	8.78382	3	3	6			-0.246537	2.15202	1.6184	0.228342	-0.514474	-0.470386		0.461226						-0.535332	4.47636	3.19005	0.456962	-1.03792	-0.964083			-0.535332	4.47636	3.19005	0.456962	-1.03792	-0.964083		0.189692		-2.89204	2.82546	0.141076
Q2R1M8	11.1886	9.0387	7.48623	10.7276	9.18016	7.49633	3	3	6			1.95778	0.387392	-1.70635	1.35973	-0.00684719	-1.75787		0.0389734						4.25114	0.805806	-3.36341	2.72112	-0.0138138	-3.60286			4.25114	0.805806	-3.36341	2.72112	-0.0138138	-3.60286		0.817869		-0.863026	0.361912	0.778133
Q2R1U4	10.0473	7.56262	9.92316	8.98675	9.13034	7.57493	3	3	6			0.816448	-1.08868	0.730587	-0.381096	-0.0566661	-1.67927		-0.276446						1.77284	-2.26454	1.44008	-0.762656	-0.11432	-3.44176			1.77284	-2.26454	1.44008	-0.762656	-0.11432	-3.44176		0.765074		-1.7557	1.52951	0.346396
Q2R1U8	10.4842	9.07868	10.0448	10.4908	10.2939	12.5742	3	3	6			1.25341	0.427377	0.852227	1.1229	1.10693	3.32001		1.34714						2.72166	0.888978	1.67984	2.24717	2.23315	6.80456			2.72166	0.888978	1.67984	2.24717	2.23315	6.80456		0.216939		1.99814	1.82245	0.28274
Q2R1V8	10.5111	7.87369	9.00397	10.638	10.8844	9.8593	3	3	6			1.28025	-0.777617	-0.18861	1.27014	1.69739	0.605099		0.647775						2.77995	-1.6175	-0.371772	2.54182	3.42438	1.24019			2.77995	-1.6175	-0.371772	2.54182	3.42438	1.24019		0.38059		2.13857	2.21518	0.215359
Q2R224	10.8028	10.9635	10.9888	10.014	10.7379	10.9232	3	3	6			1.57203	2.31224	1.79625	0.646173	1.55092	1.66898		1.5911						3.41352	4.80963	3.54063	1.29313	3.12888	3.42067			3.41352	4.80963	3.54063	1.29313	3.12888	3.42067		0.61878		-1.30703	2.4885	0.178191
Q2R237	10.6485	7.69397	8.97914	9.53438	8.52904	7.81231	3	3	6			1.41772	-0.957332	-0.213438	0.166533	-0.657965	-1.4419		-0.281062						3.07846	-1.99132	-0.420712	0.333269	-1.3274	-2.95525			3.07846	-1.99132	-0.420712	0.333269	-1.3274	-2.95525		0.572856		-1.53861	1.20203	0.434662
Q2R2B1	9.74406	8.71459	9.67092	10.0347	10.4223	9.36352	3	3	6			0.513248	0.0632819	0.478345	0.666814	1.23527	0.109319		0.511046						1.11447	0.131631	0.942875	1.33444	2.49208	0.224056			1.11447	0.131631	0.942875	1.33444	2.49208	0.224056		0.352923		0.620532	1.19014	0.438261
Q2R2B4	11.7635	10.938	11.3044	11.041	9.11025	11.2071	3	3	6			2.53265	2.28666	2.11177	1.6732	-0.0767566	1.95287		1.74673						5.49942	4.75642	4.16256	3.34843	-0.154852	4.00253			5.49942	4.75642	4.16256	3.34843	-0.154852	4.00253		0.164761		-2.40743	2.75141	0.148506
Q2R2D5	12.1181	11.0904	8.55601	10.4555	10.3555	9.56949	3	3	6			2.88732	2.43914	-0.636569	1.08768	1.16846	0.315293		1.21022						6.26956	5.07359	-1.25476	2.1767	2.35729	0.646211			6.26956	5.07359	-1.25476	2.1767	2.35729	0.646211		0.102572		-1.63607	0.909619	0.532326
Q2R2P7	11.5937	11.5606	10.8557	10.1143	9.94263	11.9079	3	3	6			2.36286	2.90926	1.66315	0.746415	0.755627	2.6537		1.8485						5.13074	6.05149	3.27827	1.49374	1.52443	5.43892			5.13074	6.05149	3.27827	1.49374	1.52443	5.43892		0.558588		-2.00114	1.91904	0.26443
Q2R2T4	10.3645	9.40028	10.4537	6.87246	10.9652	8.60785	3	3	6			1.13365	0.748975	1.2611	-2.49539	1.7782	-0.646354		0.296698						2.46162	1.55792	2.48579	-4.99382	3.58741	-1.32474			2.46162	1.55792	2.48579	-4.99382	3.58741	-1.32474		0.0297269		-3.07883	1.55287	0.340832
Q2R2W1	8.0927	8.91892	9.14185	8.20051	7.11468	7.07596	3	3	6			-1.13811	0.267616	-0.0507255	-1.16734	-2.07233	-2.17824		-1.05652						-2.4713	0.556661	-0.0999861	-2.33611	-4.18078	-4.46444			-2.4713	0.556661	-0.0999861	-2.33611	-4.18078	-4.46444		0.689714		-2.9889	4.1042	0.0581451
Q2R2W8	9.29634	9.7923	9.92178	10.9779	9.50404	12.477	3	3	6			0.0655301	1.141	0.729204	1.61008	0.317039	3.2228		1.18094						0.142293	2.37336	1.43735	3.22211	0.639606	6.60532			0.142293	2.37336	1.43735	3.22211	0.639606	6.60532		0.245964		2.17135	1.71611	0.304368
Q2R2Z0	10.4345	9.09167	8.73023	9.57524	8.1576	7.12174	3	3	6			1.20371	0.440366	-0.462345	0.207389	-1.02941	-2.13246		-0.295458						2.61375	0.915995	-0.911338	0.41503	-2.07676	-4.37061			2.61375	0.915995	-0.911338	0.41503	-2.07676	-4.37061		0.703413		-2.88358	2.57151	0.168227
Q2R2Z4	5.02835	6.36441	6.79597	6.18228	6.8282	9.00974	3	3	6			-4.20246	-2.28689	-2.3966	-3.18557	-2.35881	-0.244458		-2.4458						-9.12528	-4.75691	-4.72399	-6.37503	-4.75874	-0.501031			-9.12528	-4.75691	-4.72399	-6.37503	-4.75874	-0.501031		0.820818		2.3238	1.44998	0.366027
Q2R374	10.1248	8.41692	10.8383	12.4133	9.48335	10.3486	3	3	6			0.893955	-0.234383	1.64576	3.04541	0.296347	1.09442		1.12358						1.94114	-0.487534	3.24399	6.09453	0.597862	2.24307			1.94114	-0.487534	3.24399	6.09453	0.597862	2.24307		0.621306		1.41262	0.967726	0.511311
Q2R3B4	7.16038	8.82327	8.91115	8.69404	8.44054	7.39421	3	3	6			-2.07044	0.171965	-0.281425	-0.673803	-0.746468	-1.86		-0.910028						-4.49577	0.357699	-0.554723	-1.34843	-1.50595	-3.81218			-4.49577	0.357699	-0.554723	-1.34843	-1.50595	-3.81218		0.444676		-0.65792	0.480571	0.716694
Q2R3F5	9.96895	8.76331	8.84037	9.94336	9.82791	11.518	3	3	6			0.738142	0.112005	-0.352208	0.575517	0.640909	2.26381		0.663029						1.60281	0.232979	-0.694245	1.15174	1.29299	4.63982			1.60281	0.232979	-0.694245	1.15174	1.29299	4.63982		0.510351		1.981	2.26511	0.208033
Q2R3K3	10.78	8.67518	9.03598	10.8296	7.22275	8.22463	3	3	6			1.54915	0.0238737	-0.156596	1.4618	-1.96426	-1.02957		-0.0192676						3.36385	0.0496591	-0.30867	2.92537	-3.96276	-2.11017			3.36385	0.0496591	-0.30867	2.92537	-3.96276	-2.11017		0.487919		-2.08413	1.22335	0.428287
Q2R3K5	8.85368	8.37908	8.65331	11.5457	7.69481	8.99774	3	3	6			-0.377129	-0.272232	-0.539266	2.17789	-1.49219	-0.256458		-0.126565						-0.818902	-0.566263	-1.06296	4.35843	-3.01041	-0.525627			-0.818902	-0.566263	-1.06296	4.35843	-3.01041	-0.525627		0.00873921		1.09017	0.589087	0.664763
Q2R435	11.0751	9.268	7.52865	8.47241	10.0921	10.4585	3	3	6			1.84433	0.616697	-1.66393	-0.895441	0.905091	1.20431		0.335176						4.0048	1.28278	-3.2798	-1.79197	1.82596	2.4683			4.0048	1.28278	-3.2798	-1.79197	1.82596	2.4683		0.56049		0.164837	0.0729519	0.950691
Q2R482	10.8166	11.0751	11.1544	10.7079	11.8584	10.3634	3	3	6			1.58577	2.42384	1.96186	1.34003	2.6714	1.10917		1.84868						3.44336	5.04177	3.86707	2.68169	5.38938	2.2733			3.44336	5.04177	3.86707	2.68169	5.38938	2.2733		0.385912		-0.669272	0.806249	0.571867
Q2R4I5	7.95989	10.4582	8.67373	10.1297	9.30156	8.32508	3	3	6			-1.27093	1.80689	-0.518844	0.761822	0.11456	-0.929122		-0.00593613						-2.7597	3.75848	-1.0227	1.52457	0.231117	-1.90429			-2.7597	3.75848	-1.0227	1.52457	0.231117	-1.90429		0.416661		-0.0415567	0.0206751	0.985771
Q2R4J1	9.24444	10.0843	8.83993	8.77377	9.22694	8.77396	3	3	6			0.0136226	1.43297	-0.352649	-0.594082	0.039937	-0.480239		0.0099265						0.0295803	2.98069	-0.695114	-1.18889	0.0805703	-0.984279			0.0295803	2.98069	-0.695114	-1.18889	0.0805703	-0.984279		0.218329		-1.46925	1.81159	0.284877
Q2R4J4	9.26268	9.29536	9.55796	8.43588	10.4478	11.1694	3	3	6			0.0318696	0.644049	0.365384	-0.931969	1.2608	1.91516		0.547549						0.0692019	1.33967	0.720217	-1.86507	2.54359	3.92523			0.0692019	1.33967	0.720217	-1.86507	2.54359	3.92523		0.0845327		0.824885	0.582384	0.667859
Q2R4Z8	5.16659	8.87713	7.92428	6.34876	11.2276	7.43729	3	3	6			-4.06422	0.225824	-1.2683	-3.01908	2.04055	-1.81691		-1.31702						-8.82509	0.46973	-2.49997	-6.04185	4.11668	-3.72386			-8.82509	0.46973	-2.49997	-6.04185	4.11668	-3.72386		0.885925		1.73543	0.524679	0.695114
Q2R637	7.72547	9.82733	9.00532	9.39806	9.4776	9.32319	3	3	6			-1.50534	1.17602	-0.187261	0.0302117	0.290591	0.0689875		-0.0211325						-3.26872	2.44621	-0.369115	0.0604603	0.586249	0.141394			-3.26872	2.44621	-0.369115	0.0604603	0.586249	0.141394		0.0194401		0.65991	0.45717	0.728414
Q2R712	10.9009	8.65446	11.5037	9.32339	10.0001	8.29508	3	3	6			1.67013	0.00314992	2.31115	-0.0444553	0.813136	-0.959122		0.632331						3.62654	0.00655207	4.55555	-0.0889648	1.64045	-1.96578			3.62654	0.00655207	4.55555	-0.0889648	1.64045	-1.96578		0.720507		-2.86765	2.52537	0.173695
Q2R837	8.63496	8.92398	7.12422	9.1696	11.1744	9.13445	3	3	6			-0.595856	0.272674	-2.06835	-0.198249	1.98736	-0.11975		-0.120362						-1.29385	0.567183	-4.07697	-0.396739	4.00937	-0.245436			-1.29385	0.567183	-4.07697	-0.396739	4.00937	-0.245436		0.932269		2.72361	2.05728	0.240268
Q2R8L1	11.3203	10.2103	11.2135	12.4534	11.066	10.9098	3	3	6			2.08948	1.559	2.02089	3.08555	1.87895	1.65562		2.04825						4.53712	3.24284	3.98342	6.17486	3.79066	3.39328			4.53712	3.24284	3.98342	6.17486	3.79066	3.39328		0.314124		0.531809	0.727318	0.604026
Q2R8P2	11.6659	3.50004	8.13591	9.18681	8.65517	9.56442	3	3	6			2.43506	-5.15127	-1.05666	-0.18104	-0.531832	0.310214		-0.695922						5.28751	-10.715	-2.08281	-0.362301	-1.07294	0.635802			5.28751	-10.715	-2.08281	-0.362301	-1.07294	0.635802		0.0227103		2.23697	0.562635	0.677064
Q2R9D2	10.3078	10.6098	10.2722	9.82572	10.8156	10.4462	3	3	6			1.07696	1.95852	1.07959	0.457874	1.62862	1.19195		1.23225						2.33852	4.07387	2.12799	0.916307	3.28563	2.44297			2.33852	4.07387	2.12799	0.916307	3.28563	2.44297		0.883051		-0.631822	0.907021	0.533285
Q2RA93	14.1273	12.9829	13.3408	13.1803	13.2105	10.5362	3	3	6			4.89654	4.33156	4.14825	3.81245	4.0235	1.28195		3.74904						10.6324	9.00998	8.1767	7.62955	8.11715	2.62743			10.6324	9.00998	8.1767	7.62955	8.11715	2.62743		0.289008		-3.14832	2.53725	0.172271
Q2RAC5	7.22709	7.66035	11.6414	7.84962	10.3235	9.39765	3	3	6			-2.00373	-0.990955	2.44884	-1.51822	1.1365	0.143451		-0.130685						-4.35091	-2.06126	4.82696	-3.0383	2.29282	0.294011			-4.35091	-2.06126	4.82696	-3.0383	2.29282	0.294011		0.482369		0.377913	0.134881	0.910745
Q2RAK2	9.70707	8.26903	12.5272	11.9238	11.7597	9.25349	3	3	6			0.476253	-0.382274	3.33458	2.55593	2.57268	-0.00070941		1.42608						1.03414	-0.795159	6.57286	5.11497	5.19021	-0.00145398			1.03414	-0.795159	6.57286	5.11497	5.19021	-0.00145398		0.751324		1.16396	0.516039	0.699289
Q2RAP0	8.14333	8.6271	9.09614	8.33226	7.5157	9.47796	3	3	6			-1.08748	-0.024211	-0.0964419	-1.03559	-1.67131	0.223758		-0.615211						-2.36137	-0.0503608	-0.190099	-2.07244	-3.37175	0.458606			-2.36137	-0.0503608	-0.190099	-2.07244	-3.37175	0.458606		0.613549		-0.794585	0.766192	0.587967
Q2RB59	9.13096	7.81423	9.22884	6.72083	7.60043	9.39765	3	3	6			-0.099856	-0.837077	0.0362655	-2.64702	-1.58657	0.143451		-0.831802						-0.216828	-1.74118	0.0714837	-5.29727	-3.20081	0.294011			-0.216828	-1.74118	0.0714837	-5.29727	-3.20081	0.294011		0.212552		-2.10585	1.78977	0.289219
Q2RBB1	9.20953	5.75261	9.35676	7.61021	9.35977	8.34461	3	3	6			-0.0212861	-2.89869	0.164183	-1.75764	0.172767	-0.909596		-0.875043						-0.0462209	-6.0295	0.323624	-3.51741	0.348545	-1.86427			-0.0462209	-6.0295	0.323624	-3.51741	0.348545	-1.86427		0.456645		0.239653	0.114853	0.923476
Q2RBE3	14.2334	9.28276	13.1975	13.2223	13.0454	13.4393	3	3	6			5.00258	0.631457	4.00489	3.85448	3.85841	4.18511		3.58949						10.8627	1.31348	7.89411	7.71366	7.7841	8.57763			10.8627	1.31348	7.89411	7.71366	7.7841	8.57763		0.0190912		1.33504	0.549391	0.683308
Q2RBF0	5.66585	7.99288	9.65575	9.19032	8.29297	8.58534	3	3	6			-3.56497	-0.658425	0.463168	-0.177529	-0.894039	-0.668864		-0.916776						-7.74101	-1.36957	0.91296	-0.355275	-1.80367	-1.37088			-7.74101	-1.36957	0.91296	-0.355275	-1.80367	-1.37088		0.0534879		1.55593	0.772956	0.585217
Q2RBJ4	10.0285	10.4148	8.59249	8.58519	10.6516	8.95204	3	3	6			0.797646	1.76348	-0.600083	-0.78266	1.46458	-0.30216		0.390135						1.73202	3.66818	-1.18284	-1.56627	2.95471	-0.619295			1.73202	3.66818	-1.18284	-1.56627	2.95471	-0.619295		0.976134		-1.14941	0.75882	0.590979
Q2RBJ6	11.8135	11.1096	9.0098	9.68456	11.2411	9.82034	3	3	6			2.58265	2.45826	-0.182777	0.316708	2.05408	0.566136		1.29918						5.60799	5.11337	-0.360275	0.633802	4.14398	1.16033			5.60799	5.11337	-0.360275	0.633802	4.14398	1.16033		0.492423		-1.47433	0.889177	0.539922
Q2RBN7	11.3528	10.8427	11.4957	12.4919	10.9139	10.997	3	3	6			2.12195	2.19144	2.30308	3.12406	1.72686	1.74284		2.2017						4.60762	4.55835	4.53965	6.25192	3.48382	3.57205			4.60762	4.55835	4.53965	6.25192	3.48382	3.57205		0.000995811		-0.132611	0.156293	0.897328
Q2RBP2	9.18306	8.54693	10.6308	11.562	10.9793	12.0862	3	3	6			-0.0477479	-0.104374	1.43824	2.19416	1.79228	2.83197		1.35075						-0.10368	-0.217106	2.83494	4.39099	3.6158	5.80429			-0.10368	-0.217106	2.83494	4.39099	3.6158	5.80429		0.582837		3.76564	4.88858	0.033759
Q2TN88	9.91718	6.68958	5.63241	2.83214	5.93126	6.79194	3	3	6			0.686366	-1.96173	-3.56016	-6.53571	-3.25575	-2.46226		-2.84821						1.49038	-4.08054	-7.01751	-13.0794	-6.56826	-5.04655			1.49038	-4.08054	-7.01751	-13.0794	-6.56826	-5.04655		0.987308		-5.02884	2.15325	0.224805
Q2V0P1	7.42911	7.68685	8.25054	7.97223	12.1934	8.94336	3	3	6			-1.8017	-0.964456	-0.942042	-1.39561	3.00643	-0.310838		-0.40137						-3.91223	-2.00614	-1.85688	-2.79293	6.06527	-0.637081			-3.91223	-2.00614	-1.85688	-2.79293	6.06527	-0.637081		0.115952		3.47017	1.86121	0.275245
Q336N8	11.0951	8.78771	10.9495	10.72	10.9848	11.5546	3	3	6			1.86432	0.1364	1.75696	1.35214	1.79784	2.30043		1.53468						4.04821	0.283722	3.46318	2.70593	3.62703	4.71488			4.04821	0.283722	3.46318	2.70593	3.62703	4.71488		0.395417		1.08424	1.14234	0.453025
Q336P5	10.8407	9.77615	8.32459	8.66192	8.32975	8.90785	3	3	6			1.60989	1.12485	-0.867992	-0.705927	-0.857254	-0.34635		-0.00713163						3.49573	2.33977	-1.71092	-1.41272	-1.72945	-0.709866			3.49573	2.33977	-1.71092	-1.41272	-1.72945	-0.709866		0.0702937		-2.65887	2.52808	0.173369
Q336R3	10.8328	10.8981	11.0568	12.9906	10.3683	10.9386	3	3	6			1.602	2.24677	1.86426	3.62279	1.18128	1.68442		2.03359						3.4786	4.67344	3.67469	7.24999	2.38316	3.45232			3.4786	4.67344	3.67469	7.24999	2.38316	3.45232		0.118116		0.419583	0.328265	0.796494
Q336R9	7.40625	11.0269	5.72778	8.00904	9.80271	8.92579	3	3	6			-1.82457	2.37563	-3.46479	-1.3588	0.615705	-0.328411		-0.664206						-3.96188	4.94149	-6.82953	-2.71926	1.24215	-0.673097			-3.96188	4.94149	-6.82953	-2.71926	1.24215	-0.673097		0.188685		1.23323	0.40138	0.757134
Q336V5	9.85551	2.59479	10.6048	7.80793	10.5754	7.13545	3	3	6			0.624694	-6.05652	1.41225	-1.55991	1.38835	-2.11875		-1.05165						1.35647	-12.598	2.78372	-3.12173	2.8009	-4.3425			1.35647	-12.598	2.78372	-3.12173	2.8009	-4.3425		0.336287		1.26483	0.276362	0.825671
Q336V8	8.36497	10.9679	10.957	10.4334	8.92902	9.62169	3	3	6			-0.865846	2.31664	1.76438	1.06553	-0.257983	0.367483		0.7317						-1.88011	4.81879	3.47781	2.13236	-0.520465	0.753179			-1.88011	4.81879	3.47781	2.13236	-0.520465	0.753179		0.245787		-1.35047	0.810965	0.570001
Q336V9	9.96242	7.31334	7.43137	8.22419	8.38478	10.996	3	3	6			0.731606	-1.33797	-1.7612	-1.14365	-0.802221	1.74185		-0.428599						1.58862	-2.78308	-3.47155	-2.2887	-1.61843	3.57002			1.58862	-2.78308	-3.47155	-2.2887	-1.61843	3.57002		0.845602		1.44297	0.772017	0.585598
Q336X9	10.9164	7.84361	8.65793	9.67841	9.47885	9.05748	3	3	6			1.68559	-0.8077	-0.534651	0.310559	0.291845	-0.196725		0.124819						3.66011	-1.68008	-1.05386	0.621496	0.58878	-0.4032			3.66011	-1.68008	-1.05386	0.621496	0.58878	-0.4032		0.0765557		-0.0396977	0.0252092	0.982678
Q337A0	7.74329	9.48629	11.8422	9.77388	9.95748	10.6173	3	3	6			-1.48753	0.834985	2.64962	0.406033	0.770474	1.36308		0.756111						-3.23003	1.73683	5.22271	0.812561	1.55438	2.79372			-3.23003	1.73683	5.22271	0.812561	1.55438	2.79372		0.105201		0.477049	0.219177	0.859055
Q337A5	9.10397	8.74035	10.1042	9.12689	5.32117	10.3907	3	3	6			-0.126843	0.0890471	0.911628	-0.240963	-3.86583	1.1365		-0.34941						-0.275428	0.185225	1.79693	-0.482219	-7.79907	2.32933			-0.275428	0.185225	1.79693	-0.482219	-7.79907	2.32933		0.0830299		-2.5529	1.13849	0.454235
Q337B8	11.1172	7.81327	9.91488	9.38316	8.40011	8.64832	3	3	6			1.88638	-0.838039	0.722301	0.0153164	-0.786894	-0.605881		0.06553						4.0961	-1.74318	1.42374	0.0306515	-1.58751	-1.24179			4.0961	-1.74318	1.42374	0.0306515	-1.58751	-1.24179		0.156658		-2.19177	1.83395	0.280496
Q337C0	9.02442	9.72272	11.1484	5.09866	8.80009	6.50016	3	3	6			-0.206393	1.07142	1.95584	-4.26918	-0.386914	-2.75404		-0.76488						-0.448165	2.22862	3.85519	-8.54357	-0.780574	-5.64457			-0.448165	2.22862	3.85519	-8.54357	-0.780574	-5.64457		0.469593		-6.86812	4.13752	0.0568176
Q337Y2	5.74827	5.95952	8.339	7.75469	10.2737	8.93142	3	3	6			-3.48254	-2.69179	-0.853573	-1.61316	1.08667	-0.322785		-1.31286						-7.56203	-5.59913	-1.6825	-3.22829	2.1923	-0.661568			-7.56203	-5.59913	-1.6825	-3.22829	2.1923	-0.661568		0.901442		4.38203	2.90611	0.133406
Q338B9	11.4257	8.86595	8.74923	8.85159	9.54506	9.2134	3	3	6			2.19488	0.214643	-0.443345	-0.516255	0.358056	-0.0408065		0.294528						4.76598	0.446473	-0.873886	-1.03314	0.722355	-0.0836353			4.76598	0.446473	-0.873886	-1.03314	0.722355	-0.0836353		0.16301		-1.57766	1.23511	0.42481
Q338C0	8.34837	9.79572	10.6779	9.3953	4.91977	9.21529	3	3	6			-0.882439	1.14441	1.48532	0.0274506	-4.26724	-0.0389121		-0.421902						-1.91614	2.38046	2.92774	0.0549347	-8.60887	-0.0797526			-1.91614	2.38046	2.92774	0.0549347	-8.60887	-0.0797526		0.444342		-4.00858	1.81165	0.284864
Q338N2	10.946	10.0788	10.0448	10.4337	12.156	11.5544	3	3	6			1.71522	1.42751	0.852227	1.06584	2.96895	2.30019		1.72166						3.72444	2.96933	1.67984	2.13298	5.98967	4.71439			3.72444	2.96933	1.67984	2.13298	5.98967	4.71439		0.433667		1.48781	1.68812	0.310331
Q338P8	9.18078	9.78705	9.27193	9.37484	7.0691	9.54084	3	3	6			-0.0500332	1.13575	0.0793526	0.00699601	-2.1179	0.286642		-0.109867						-0.108643	2.36244	0.156414	0.0140005	-4.27274	0.587491			-0.108643	2.36244	0.156414	0.0140005	-4.27274	0.587491		0.413831		-2.02715	1.71617	0.304356
Q339N5	10.0225	8.15223	8.56674	10.1982	9.14919	10.5716	3	3	6			0.791694	-0.499073	-0.625838	0.830352	-0.0378168	1.31736		0.296113						1.71909	-1.03811	-1.2336	1.66172	-0.0762929	2.70001			1.71909	-1.03811	-1.2336	1.66172	-0.0762929	2.70001		0.838375		1.61268	1.90605	0.266822
Q339W7	7.02713	9.27212	9.12213	10.5941	7.64645	8.56567	3	3	6			-2.20368	0.620809	-0.0704481	1.22629	-1.54055	-0.688529		-0.442685						-4.7851	1.29133	-0.138862	2.45408	-3.10797	-1.41118			-4.7851	1.29133	-0.138862	2.45408	-3.10797	-1.41118		0.892049		0.522518	0.247342	0.842447
Q33AH8	7.6565	10.1219	8.12153	11.1737	10.7978	11.6274	3	3	6			-1.57432	1.47061	-1.07104	1.80589	1.61082	2.37319		0.769193						-3.41849	3.05899	-2.11116	3.61399	3.24972	4.864			-3.41849	3.05899	-2.11116	3.61399	3.24972	4.864		0.11516		4.73279	3.62866	0.0808472
Q33BI9	6.96047	8.52235	7.70977	10.7151	8.42652	10.1557	3	3	6			-2.27035	-0.128961	-1.4828	1.34726	-0.760489	0.901501		-0.398974						-4.92986	-0.268249	-2.92279	2.69615	-1.53424	1.84768			-4.92986	-0.268249	-2.92279	2.69615	-1.53424	1.84768		0.956219		3.71016	3.08227	0.118071
Q33DK1	5.36548	3.74739	9.83853	8.79915	9.13258	9.88356	3	3	6			-3.86533	-4.90392	0.645949	-0.568696	-0.0544282	0.629357		-1.35284						-8.39322	-10.2005	1.27324	-1.13808	-0.109805	1.28991			-8.39322	-10.2005	1.27324	-1.13808	-0.109805	1.28991		0.0751198		5.78751	2.42552	0.186143
Q35322	10.3877	6.63214	8.18478	6.3669	9.63822	10.1283	3	3	6			1.15688	-2.01917	-1.0078	-3.00095	0.451214	0.87405		-0.590962						2.51207	-4.20003	-1.9865	-6.00556	0.910295	1.79142			2.51207	-4.20003	-1.9865	-6.00556	0.910295	1.79142		0.78167		0.123538	0.0429381	0.970676
Q38861	11.4263	11.3898	10.307	10.2608	11.132	11.3147	3	3	6			2.1955	2.73849	1.1144	0.892954	1.94498	2.06049		1.82447						4.76734	5.69626	2.19661	1.787	3.92387	4.22311			4.76734	5.69626	2.19661	1.787	3.92387	4.22311		0.698817		-0.908745	0.936974	0.522327
Q38953	13.6423	11.9264	9.58248	10.4389	11.177	13.289	3	3	6			4.41146	3.2751	0.389904	1.07105	1.99004	4.03481		2.52873						9.57911	6.81246	0.768547	2.1434	4.01478	8.26958			9.57911	6.81246	0.768547	2.1434	4.01478	8.26958		0.65363		-0.910783	0.343405	0.788179
Q39189	9.81817	10.1935	10.7461	10.5616	12.0147	9.47383	3	3	6			0.587354	1.54222	1.55352	1.19373	2.82771	0.219625		1.32069						1.27539	3.20793	3.06217	2.38891	5.70473	0.450135			1.27539	3.20793	3.06217	2.38891	5.70473	0.450135		0.281816		0.332761	0.233661	0.850474
Q3E9C3	9.8503	6.72914	7.7705	9.7924	11.0442	7.94527	3	3	6			0.619484	-1.92216	-1.42208	0.424552	1.85718	-1.30893		-0.291993						1.34515	-3.99824	-2.80309	0.849622	3.74675	-2.68274			1.34515	-3.99824	-2.80309	0.849622	3.74675	-2.68274		0.862693		2.4566	1.41344	0.375416
Q3EBC8	11.5211	10.4305	10.8178	10.5626	9.29799	9.27875	3	3	6			2.29025	1.77915	1.62521	1.19478	0.110989	0.0245491		1.17082						4.97307	3.70076	3.20348	2.39101	0.223913	0.0503148			4.97307	3.70076	3.20348	2.39101	0.223913	0.0503148		0.657448		-3.07069	5.11769	0.028802
Q3EBD3	13.747	7.63445	11.9705	9.59643	9.01917	12.8436	3	3	6			4.51623	-1.01686	2.77789	0.228584	-0.167831	3.58939		1.65457						9.80659	-2.11514	5.47555	0.457447	-0.338589	7.35666			9.80659	-2.11514	5.47555	0.457447	-0.338589	7.35666		0.659294		-1.89716	0.558957	0.678793
Q3HRN7	9.24667	8.94653	8.38599	11.1164	9.11801	7.67969	3	3	6			0.0158568	0.295219	-0.806585	1.74856	-0.0689984	-1.57451		-0.0650763						0.0344316	0.614078	-1.58988	3.49925	-0.1392	-3.22705			0.0344316	0.614078	-1.58988	3.49925	-0.1392	-3.22705		0.206512		0.358122	0.200949	0.869978
Q3HRN8	8.50958	7.82807	8.58143	11.7841	7.27314	9.35255	3	3	6			-0.721235	-0.823234	-0.611151	2.41621	-1.91386	0.0983487		-0.259153						-1.5661	-1.71239	-1.20465	4.83537	-3.86109	0.201572			-1.5661	-1.71239	-1.20465	4.83537	-3.86109	0.201572		0.00718923		1.88633	0.912575	0.531236
Q3HRP5	8.85166	8.56894	8.9718	12.447	7.0899	10.4785	3	3	6			-0.379157	-0.082363	-0.220775	3.07918	-2.0971	1.22426		0.254008						-0.823306	-0.171321	-0.435174	6.16212	-4.23077	2.5092			-0.823306	-0.171321	-0.435174	6.16212	-4.23077	2.5092		0.00770895		1.95678	0.77002	0.586409
Q40665	13.6434	11.2367	11.8909	12.3841	13.1923	12.5793	3	3	6			4.41259	2.58536	2.69837	3.01623	4.00532	3.32511		3.3405						9.58156	5.37776	5.31882	6.03615	8.08047	6.81502			9.58156	5.37776	5.31882	6.03615	8.08047	6.81502		0.302474		0.217837	0.161996	0.893788
Q40677	9.56668	11.4336	11.7388	11.7661	12.273	11.3767	3	3	6			0.335869	2.78233	2.54623	2.39827	3.08597	2.12247		2.21186						0.729311	5.78746	5.01893	4.79946	6.22576	4.35012			0.729311	5.78746	5.01893	4.79946	6.22576	4.35012		0.228658		1.27988	1.0389	0.4867
Q40702	6.092	4.75969	6.41625	8.46679	9.77055	10.5231	3	3	6			-3.13882	-3.89162	-2.77633	-0.901058	0.583543	1.26887		-1.4759						-6.81566	-8.09486	-5.47248	-1.80321	1.17726	2.60062			-6.81566	-8.09486	-5.47248	-1.80321	1.17726	2.60062		0.507991		7.45256	7.02082	0.00770059
Q40703	9.91563	9.2929	9.02838	9.67338	9.91007	7.23228	3	3	6			0.684813	0.64159	-0.164201	0.305532	0.723068	-2.02193		0.0281459						1.48701	1.33456	-0.323661	0.611436	1.45874	-4.14406			1.48701	1.33456	-0.323661	0.611436	1.45874	-4.14406		0.199141		-1.52393	1.14072	0.453532
Q40731	8.80826	8.35231	9.28903	11.0534	10.445	11.5817	3	3	6			-0.422556	-0.298999	0.0964503	1.68554	1.25801	2.32747		0.774318						-0.917544	-0.62194	0.190115	3.37313	2.53795	4.77029			-0.917544	-0.62194	0.190115	3.37313	2.53795	4.77029		0.41091		4.01024	7.54208	0.00536547
Q42971	13.2033	11.2027	10.6669	13.2597	11.3439	12.3256	3	3	6			3.97246	2.55143	1.47436	3.89187	2.1569	3.07136		2.85306						8.62584	5.30717	2.90614	7.78848	4.35141	6.29493			8.62584	5.30717	2.90614	7.78848	4.35141	6.29493		0.529491		0.53189	0.327521	0.796905
Q42972	8.2988	6.2086	2.02577	10.7329	8.66306	8.93396	3	3	6			-0.932017	-2.44271	-7.1668	1.36508	-0.523945	-0.320246		-1.67011						-2.02379	-5.08103	-14.1266	2.73183	-1.05703	-0.656364			-2.02379	-5.08103	-14.1266	2.73183	-1.05703	-0.656364		0.197204		7.41663	3.00374	0.124676
Q42982	9.37925	9.43808	10.4388	11.1813	10.8094	12.3732	3	3	6			0.148436	0.786778	1.24621	1.81343	1.62244	3.11904		1.45606						0.322315	1.63656	2.45644	3.62907	3.27317	6.39267			0.322315	1.63656	2.45644	3.62907	3.27317	6.39267		0.568844		2.95986	3.96569	0.0640043
Q42993	4.35882	6.80594	5.85587	6.72465	7.72233	6.98208	3	3	6			-4.87199	-1.84537	-3.33671	-2.6432	-1.46468	-2.27212		-2.73901						-10.5791	-3.83851	-6.57706	-5.28962	-2.95489	-4.65685			-10.5791	-3.83851	-6.57706	-5.28962	-2.95489	-4.65685		0.225175		2.69777	1.92179	0.263927
Q42997	10.262	10.2885	11.7893	11.583	7.84937	8.68433	3	3	6			1.03116	1.63721	2.59675	2.21514	-1.33763	-0.569875		0.928794						2.23908	3.40553	5.11851	4.43298	-2.69858	-1.16799			2.23908	3.40553	5.11851	4.43298	-2.69858	-1.16799		0.259081		-3.39891	2.2022	0.217306
Q43007	9.83286	10.3231	10.2715	11.282	8.74292	10.9508	3	3	6			0.602046	1.67175	1.07889	1.9142	-0.444089	1.69665		1.08657						1.30729	3.47736	2.12661	3.83073	-0.895922	3.47738			1.30729	3.47736	2.12661	3.83073	-0.895922	3.47738		0.295307		-0.166361	0.11344	0.924381
Q43009	8.73667	8.73667	10.0035	11.2848	10.4974	10.6033	3	3	6			-0.49414	0.0853654	0.810941	1.91698	1.31035	1.34905		0.829757						-1.07298	0.177567	1.59846	3.83629	2.64354	2.76496			-1.07298	0.177567	1.59846	3.83629	2.64354	2.76496		0.388608		2.84725	5.07801	0.0296051
Q43011	9.96578	10.8223	9.38332	9.09751	10.2269	12.2415	3	3	6			0.734972	2.17102	0.190738	-0.270342	1.03989	2.98727		1.14226						1.59593	4.5159	0.375968	-0.541014	2.09791	6.1226			1.59593	4.5159	0.375968	-0.541014	2.09791	6.1226		0.573347		0.397234	0.199371	0.87093
Q43270	9.90647	10.6642	11.6526	10.2212	10.8975	9.09714	3	3	6			0.675657	2.01287	2.46004	0.853377	1.71054	-0.157066		1.25924						1.46713	4.18693	4.84904	1.70779	3.4509	-0.321916			1.46713	4.18693	4.84904	1.70779	3.4509	-0.321916		0.947886		-1.88877	1.85064	0.27727
Q4GZK2	10.2471	9.33331	9.4489	8.88756	6.27238	9.78465	3	3	6			1.01628	0.682005	0.256324	-0.480292	-2.91463	0.530449		-0.151643						2.20677	1.41862	0.505245	-0.96117	-5.88007	1.08719			2.20677	1.41862	0.505245	-0.96117	-5.88007	1.08719		0.107047		-3.2949	2.35139	0.195957
Q4JL76	10.1615	8.53753	2.46624	9.54587	8.37899	3.48916	3	3	6			0.930697	-0.113778	-6.72634	0.178024	-0.808017	-5.76504		-2.05074						2.02093	-0.236667	-13.2584	0.356265	-1.63012	-11.8158			2.02093	-0.236667	-13.2584	0.356265	-1.63012	-11.8158		0.770671		-0.538496	0.0991059	0.933611
Q4KYM5	5.43716	3.19207	5.40009	9.98741	8.65989	8.03133	3	3	6			-3.79365	-5.45924	-3.79248	0.619558	-0.527116	-1.22287		-2.36263						-8.23758	-11.3556	-7.47544	1.23987	-1.06342	-2.50635			-8.23758	-11.3556	-7.47544	1.23987	-1.06342	-2.50635		0.915829		8.24625	7.17726	0.00690923
Q4R1E8	11.4635	9.85845	10.8736	10.0585	11.8081	11.5742	3	3	6			2.23266	1.20714	1.68102	0.690685	2.62111	2.31997		1.7921						4.84803	2.51094	3.3135	1.38221	5.28793	4.75491			4.84803	2.51094	3.3135	1.38221	5.28793	4.75491		0.478356		0.250862	0.206433	0.866678
Q501D2	8.15289	10.6698	9.15545	9.24805	10.7246	8.21568	3	3	6			-1.07792	2.01846	-0.0371265	-0.119802	1.53759	-1.03852		0.213781						-2.34061	4.19856	-0.0731808	-0.239749	3.102	-2.12852			-2.34061	4.19856	-0.0731808	-0.239749	3.102	-2.12852		0.777752		-0.350346	0.16278	0.893302
Q52RG7	9.30271	9.71289	9.53072	10.4418	11.4387	8.37134	3	3	6			0.0718949	1.06158	0.338141	1.07396	2.25168	-0.882861		0.652399						0.156113	2.20817	0.666517	2.14922	4.54263	-1.80948			0.156113	2.20817	0.666517	2.14922	4.54263	-1.80948		0.199663		0.617189	0.381396	0.767694
Q53JI9	9.73946	10.5211	8.35094	7.27184	8.43713	10.6321	3	3	6			0.508647	1.8698	-0.841638	-2.09601	-0.749877	1.37788		0.0114679						1.10448	3.88933	-1.65897	-4.19458	-1.51283	2.82406			1.10448	3.88933	-1.65897	-4.19458	-1.51283	2.82406		0.760487		-2.07273	1.09061	0.469563
Q53K52	6.84386	8.98894	6.41719	11.8011	10.8065	7.49177	3	3	6			-2.38695	0.337633	-2.77538	2.43321	1.61954	-1.76243		-0.422396						-5.18306	0.702303	-5.47062	4.86939	3.26733	-3.6122			-5.18306	0.702303	-5.47062	4.86939	3.26733	-3.6122		0.74824		4.8253	2.20963	0.21619
Q53KK6	10.6769	7.13206	9.16186	10.0546	10.7134	10.1313	3	3	6			1.44611	-1.51924	-0.0307147	0.686756	1.52638	0.87714		0.497739						3.14011	-3.16014	-0.0605424	1.37435	3.07938	1.79775			3.14011	-3.16014	-0.0605424	1.37435	3.07938	1.79775		0.14715		2.11068	1.61455	0.326568
Q53KS8	8.46887	5.78304	6.6281	9.45107	11.176	9.32641	3	3	6			-0.761944	-2.86827	-2.56447	0.083219	1.98904	0.0722046		-0.675037						-1.65449	-5.96622	-5.05489	0.166539	4.01277	0.147988			-1.65449	-5.96622	-5.05489	0.166539	4.01277	0.147988		0.979349		5.66763	4.76738	0.0367178
Q53KW9	9.75287	11.9752	8.77548	9.56468	8.73965	9.4241	3	3	6			0.522053	3.32386	-0.417099	0.196835	-0.447359	0.169901		0.558032						1.13359	6.91388	-0.822152	0.39391	-0.902519	0.348222			1.13359	6.91388	-0.822152	0.39391	-0.902519	0.348222		0.0647297		-2.4619	1.49035	0.355926
Q53LQ0	8.74335	8.00439	14.2511	11.0843	8.14435	8.28225	3	3	6			-0.487459	-0.646918	5.05854	1.7165	-1.04265	-0.971948		0.604342						-1.05847	-1.34564	9.97099	3.43508	-2.10348	-1.99207			-1.05847	-1.34564	9.97099	3.43508	-2.10348	-1.99207		0.388089		-2.74245	0.876201	0.5448
Q53LY0	11.8689	10.4544	12.4404	11.424	10.4986	11.4897	3	3	6			2.63805	1.8031	3.24777	2.05611	1.31164	2.23555		2.21537						5.72829	3.75057	6.40175	4.11472	2.64616	4.58188			5.72829	3.75057	6.40175	4.11472	2.64616	4.58188		0.699028		-1.51262	2.32224	0.199957
Q53M11	8.34141	7.6642	8.27403	6.93676	9.68764	8.87061	3	3	6			-0.889405	-0.987109	-0.918549	-2.43109	0.500633	-0.383591		-0.851519						-1.93126	-2.05326	-1.81057	-4.86515	1.01	-0.786193			-1.93126	-2.05326	-1.81057	-4.86515	1.01	-0.786193		0.00324396		0.384583	0.24214	0.84549
Q53M52	11.2838	11.7093	11.6926	11.9233	11.8187	11.5884	3	3	6			2.05303	3.05799	2.50004	2.55548	2.6317	2.33418		2.52207						4.45797	6.36086	4.92788	5.11407	5.30928	4.78405			4.45797	6.36086	4.92788	5.11407	5.30928	4.78405		0.133865		-0.179766	0.364583	0.776693
Q53MB8	6.82883	4.90458	9.16855	4.13873	6.8596	7.65098	3	3	6			-2.40198	-3.74673	-0.0240304	-5.22912	-2.32741	-1.60322		-2.55541						-5.21568	-7.79348	-0.0473669	-10.4646	-4.6954	-3.2859			-5.21568	-7.79348	-0.0473669	-10.4646	-4.6954	-3.2859		0.963619		-1.79646	0.735754	0.600504
Q53MD3	9.93795	8.38728	10.6382	5.68798	9.81646	6.26916	3	3	6			0.707135	-0.264022	1.44559	-3.67986	0.629451	-2.98504		-0.691125						1.53548	-0.549186	2.84943	-7.36421	1.26988	-6.11801			1.53548	-0.549186	2.84943	-7.36421	1.26988	-6.11801		0.237658		-5.34936	2.88015	0.135828
Q53N47	10.9517	7.82165	9.38422	9.876	10.4872	9.97312	3	3	6			1.72091	-0.829661	0.191645	0.508147	1.30023	0.718921		0.601699						3.7368	-1.72576	0.377756	1.01691	2.62313	1.47347			3.7368	-1.72576	0.377756	1.01691	2.62313	1.47347		0.165538		0.908239	0.704684	0.613577
Q53N72	7.66732	9.8705	10.3634	10.1263	9.78308	10.3916	3	3	6			-1.56349	1.2192	1.17079	0.758469	0.596075	1.13736		0.553068						-3.39498	2.53602	2.30777	1.51786	1.20254	2.33109			-3.39498	2.53602	2.30777	1.51786	1.20254	2.33109		0.0583051		1.2009	0.798685	0.574873
Q53N87	7.36405	9.1453	9.23467	6.72615	8.81015	10.7523	3	3	6			-1.86677	0.493988	0.0420965	-2.6417	-0.376851	1.49809		-0.475189						-4.05352	1.02753	0.0829774	-5.28662	-0.760273	3.07043			-4.05352	1.02753	0.0829774	-5.28662	-0.760273	3.07043		0.588888		-0.0111495	0.00420168	0.997092
Q53NF0	8.72857	9.02987	10.1452	9.8301	8.44931	6.85512	3	3	6			-0.502246	0.37856	0.952591	0.462255	-0.737691	-2.39908		-0.307603						-1.09058	0.787433	1.87767	0.925074	-1.48824	-4.91707			-1.09058	0.787433	1.87767	0.925074	-1.48824	-4.91707		0.414671		-2.35159	1.81432	0.284337
Q53NF7	7.48559	6.24591	9.88463	10.9139	8.55589	9.72247	3	3	6			-1.74522	-2.40539	0.692051	1.54609	-0.631112	0.468264		-0.345888						-3.7896	-5.0034	1.36412	3.09406	-1.27323	0.959734			-3.7896	-5.0034	1.36412	3.09406	-1.27323	0.959734		0.588816		3.40315	2.20486	0.216905
Q53NI2	11.3121	10.3813	11.1162	9.5108	14.5614	10.591	3	3	6			2.08133	1.73002	1.92364	0.142956	5.3744	1.33676		2.09818						4.51943	3.59857	3.79172	0.286086	10.8425	2.73977			4.51943	3.59857	3.79172	0.286086	10.8425	2.73977		0.0153348		0.65288	0.222574	0.857035
Q53NL5	5.6737	6.82883	9.96795	8.70307	6.16416	5.85342	3	3	6			-3.55711	-1.82247	0.775369	-0.664775	-3.02284	-3.40078		-1.94877						-7.72396	-3.79088	1.52835	-1.33036	-6.09839	-6.9701			-7.72396	-3.79088	1.52835	-1.33036	-6.09839	-6.9701		0.598916		-1.47079	0.577883	0.669946
Q53P09	12.9719	10.2082	10.5303	6.68804	9.47486	8.53356	3	3	6			3.74107	1.55693	1.33773	-2.67981	0.287857	-0.720639		0.58719						8.12341	3.23853	2.63683	-5.36288	0.580733	-1.47699			8.12341	3.23853	2.63683	-5.36288	0.580733	-1.47699		0.996933		-6.75264	4.27425	0.0516799
Q53P49	9.01352	10.7645	10.8438	9.52511	9.69512	12.6308	3	3	6			-0.217294	2.11315	1.65119	0.157262	0.508119	3.37659		1.26484						-0.471836	4.39551	3.25469	0.314715	1.0251	6.92052			-0.471836	4.39551	3.25469	0.314715	1.0251	6.92052		0.660224		0.360655	0.160539	0.894691
Q53P54	8.2572	8.63981	6.73728	5.31531	8.22685	8.11946	3	3	6			-0.973613	-0.0114961	-2.4553	-4.05254	-0.960159	-1.13474		-1.59797						-2.11412	-0.0239128	-4.83969	-8.11001	-1.93706	-2.32572			-2.11412	-0.0239128	-4.83969	-8.11001	-1.93706	-2.32572		0.655822		-1.79836	0.996747	0.501129
Q53P85	11.9642	8.67617	9.65953	6.25716	8.03562	8.88163	3	3	6			2.73338	0.0248616	0.466955	-3.11069	-1.15138	-0.372568		-0.234906						5.9353	0.0517139	0.920425	-6.22517	-2.32284	-0.763601			5.9353	0.0517139	0.920425	-6.22517	-2.32284	-0.763601		0.879341		-5.40635	3.44335	0.0919279
Q53P98	9.18903	7.11093	7.83983	7.96872	7.91761	9.93808	3	3	6			-0.0417788	-1.54038	-1.35274	-1.39912	-1.26939	0.683878		-0.819924						-0.0907189	-3.20411	-2.66642	-2.79995	-2.56092	1.40165			-0.0907189	-3.20411	-2.66642	-2.79995	-2.56092	1.40165		0.664275		0.667341	0.495326	0.709401
Q53PC7	9.92499	8.01703	9.07967	8.3166	9.14428	7.71088	3	3	6			0.694178	-0.634276	-0.112906	-1.05125	-0.0427291	-1.54333		-0.448385						1.50735	-1.31934	-0.222551	-2.10378	-0.0862033	-3.16314			1.50735	-1.31934	-0.222551	-2.10378	-0.0862033	-3.16314		0.907817		-1.77286	2.18295	0.220226
Q53PP5	12.1366	6.33439	12.0473	10.0347	7.53893	9.00532	3	3	6			2.90579	-2.31692	2.85468	0.666814	-1.64808	-0.248887		0.368901						6.30968	-4.81936	5.62693	1.33444	-3.32489	-0.510108			6.30968	-4.81936	5.62693	1.33444	-3.32489	-0.510108		0.247933		-3.20593	1.14693	0.451584
Q53Q32	11.517	8.41794	11.4498	5.94881	9.18396	11.3442	3	3	6			2.28622	-0.23337	2.25724	-3.41904	-0.00304713	2.08998		0.496331						4.96432	-0.485428	4.4493	-6.84224	-0.00614739	4.28354			4.96432	-0.485428	4.4493	-6.84224	-0.00614739	4.28354		0.446621		-3.83101	1.48934	0.356176
Q53QI0	8.60255	9.51031	9.01762	7.26744	8.27123	10.0233	3	3	6			-0.628262	0.859002	-0.174961	-2.10041	-0.915775	0.769136		-0.365211						-1.36422	1.78679	-0.34487	-4.20337	-1.84752	1.57639			-1.36422	1.78679	-0.34487	-4.20337	-1.84752	1.57639		0.468702		-1.5174	1.07994	0.473049
Q53QK0	8.41227	7.52019	10.3323	9.81606	7.9648	7.79116	3	3	6			-0.818539	-1.13112	1.13968	0.448208	-1.2222	-1.46304		-0.507835						-1.77739	-2.35282	2.24645	0.896962	-2.46571	-2.99859			-1.77739	-2.35282	2.24645	0.896962	-2.46571	-2.99859		0.83072		-0.89453	0.597228	0.661023
Q53RB0	10.7317	9.99944	10.6093	12.4976	9.02253	10.3712	3	3	6			1.50093	1.34813	1.41669	3.1297	-0.164471	1.11703		1.39134						3.25914	2.80421	2.79248	6.26322	-0.331809	2.28942			3.25914	2.80421	2.79248	6.26322	-0.331809	2.28942		0.0127625		-0.211663	0.116689	0.922302
Q53RH0	10.5276	9.45257	6.2971	9.58092	9.92664	3.80312	3	3	6			1.29676	0.801264	-2.89548	0.21307	0.739632	-5.45108		-0.882638						2.8158	1.66669	-5.70734	0.4264	1.49216	-11.1723			2.8158	1.66669	-5.70734	0.4264	1.49216	-11.1723		0.604816		-2.6763	0.711098	0.610855
Q53RJ5	8.76583	9.71828	10.9061	11.8228	10.9428	10.8373	3	3	6			-0.46498	1.06697	1.71349	2.45492	1.7558	1.58311		1.35155						-1.00966	2.21938	3.37749	4.91284	3.54222	3.24468			-1.00966	2.21938	3.37749	4.91284	3.54222	3.24468		0.265617		2.37084	2.57457	0.167872
Q53RK8	10.9508	10.7923	9.60281	10.7102	11.7957	7.21849	3	3	6			1.72003	2.141	0.410233	1.34236	2.60871	-2.03571		1.0311						3.7349	4.45343	0.808619	2.68635	5.2629	-4.17231			3.7349	4.45343	0.808619	2.68635	5.2629	-4.17231		0.270969		-1.74001	0.745793	0.59634
Q53WJ1	10.5106	10.5085	9.00054	10.9264	8.79273	9.8237	3	3	6			1.27975	1.85718	-0.192042	1.5586	-0.39428	0.569499		0.779785						2.77887	3.86308	-0.378538	3.11909	-0.795434	1.16722			2.77887	3.86308	-0.378538	3.11909	-0.795434	1.16722		0.881993		-0.924177	0.699218	0.615906
Q56UD1	10.5273	5.80369	9.86178	9.37197	9.78341	8.46177	3	3	6			1.29647	-2.84762	0.669208	0.00412475	0.596403	-0.792436		-0.178975						2.81517	-5.92326	1.31909	0.00825454	1.2032	-1.62415			2.81517	-5.92326	1.31909	0.00825454	1.2032	-1.62415		0.168881		0.45877	0.186636	0.878652
Q56X76	9.87937	8.84175	11.3086	9.34762	9.9273	9.82564	3	3	6			0.648556	0.190446	2.11605	-0.0202265	0.740299	0.57144		0.70776						1.40828	0.396142	4.17098	-0.0404777	1.49351	1.1712			1.40828	0.396142	4.17098	-0.0404777	1.49351	1.1712		0.292577		-1.11706	1.27932	0.411991
Q570X5	9.01514	9.303	9.35905	10.4841	8.04111	6.49147	3	3	6			-0.215676	0.651697	0.16647	1.11627	-1.14589	-2.76273		-0.364978						-0.468322	1.35558	0.328132	2.2339	-2.31177	-5.66239			-0.468322	1.35558	0.328132	2.2339	-2.31177	-5.66239		0.101082		-2.31855	1.39833	0.379367
Q588V7	12.1409	11.3701	11.18	11.8091	11.9532	11.9875	3	3	6			2.91005	2.71878	1.98746	2.44124	2.76621	2.73331		2.59284						6.31892	5.65527	3.91752	4.88545	5.58065	5.60208			6.31892	5.65527	3.91752	4.88545	5.58065	5.60208		0.19509		0.0588266	0.0869153	0.941534
Q5CD17	10.1734	9.48884	8.94851	9.58873	10.4326	8.55915	3	3	6			0.942615	0.837537	-0.244064	0.220886	1.24564	-0.695055		0.384593						2.0468	1.74214	-0.48108	0.44204	2.513	-1.42456			2.0468	1.74214	-0.48108	0.44204	2.513	-1.42456		0.658484		-0.59246	0.532056	0.691569
Q5D892	12.0555	10.8412	13.0622	11.5353	10.6336	11.8662	3	3	6			2.82464	2.18994	3.86962	2.16743	1.44663	2.61199		2.51838						6.13346	4.55525	7.62749	4.3375	2.91847	5.35344			6.13346	4.55525	7.62749	4.3375	2.91847	5.35344		0.775819		-1.90226	2.56768	0.168676
Q5EAE9	8.99817	10.3271	10.1257	10.1722	7.41827	10.3716	3	3	6			-0.232645	1.6758	0.933095	0.80433	-1.76873	1.11736		0.421534						-0.505169	3.48578	1.83924	1.60964	-3.5683	2.29009			-0.505169	3.48578	1.83924	1.60964	-3.5683	2.29009		0.563049		-1.49614	0.914139	0.53066
Q5FYU1	9.095	8.1815	9.62726	6.26193	7.75602	9.97628	3	3	6			-0.135811	-0.469807	0.434683	-3.10592	-1.43098	0.722075		-0.664294						-0.294902	-0.977234	0.856813	-6.21563	-2.88692	1.47994			-0.294902	-0.977234	0.856813	-6.21563	-2.88692	1.47994		0.109085		-2.40243	1.49965	0.35364
Q5JJV0	11.2121	9.59766	8.51531	9.8984	9.478	8.24493	3	3	6			1.98126	0.946354	-0.677272	0.530557	0.290996	-1.00927		0.343771						4.30213	1.96849	-1.33498	1.06176	0.587066	-2.06855			4.30213	1.96849	-1.33498	1.06176	0.587066	-2.06855		0.523721		-1.78512	1.31684	0.401414
Q5JJY4	8.15548	7.22516	8.37082	9.78441	8.18839	11.5196	3	3	6			-1.07534	-1.42615	-0.821759	0.416558	-0.998614	2.26543		-0.273311						-2.335	-2.9665	-1.61979	0.833624	-2.01464	4.64314			-2.335	-2.9665	-1.61979	0.833624	-2.01464	4.64314		0.0781899		3.46114	2.70501	0.153359
Q5JK20	9.01698	8.23472	7.46557	8.99546	7.00809	11.3879	3	3	6			-0.213837	-0.416585	-1.72701	-0.372392	-2.17891	2.13365		-0.462514						-0.464329	-0.866529	-3.40415	-0.745237	-4.39582	4.37305			-0.464329	-0.866529	-3.40415	-0.745237	-4.39582	4.37305		0.231562		1.32233	0.620411	0.650486
Q5JK32	9.95836	9.47421	10.1147	11.3076	9.89224	8.17807	3	3	6			0.727552	0.822906	0.922076	1.93975	0.705234	-1.07614		0.673564						1.57981	1.71171	1.81752	3.88187	1.42276	-2.2056			1.57981	1.71171	1.81752	3.88187	1.42276	-2.2056		0.00302011		-0.670005	0.431947	0.741261
Q5JK35	9.51769	8.31011	8.6171	11.6537	9.017	8.96731	3	3	6			0.286876	-0.341194	-0.575477	2.2858	-0.170002	-0.28689		0.199853						0.622927	-0.70971	-1.13434	4.57439	-0.342968	-0.587998			0.622927	-0.70971	-1.13434	4.57439	-0.342968	-0.587998		0.180359		1.62152	1.28734	0.409705
Q5JK52	10.4158	9.21079	10.591	9.88503	9.26153	5.40473	3	3	6			1.18503	0.559486	1.39838	0.517177	0.0745258	-3.84947		-0.0191436						2.5732	1.16377	2.75638	1.03499	0.150351	-7.88972			2.5732	1.16377	2.75638	1.03499	0.150351	-7.88972		0.060902		-4.39925	2.30934	0.201753
Q5JK90	6.9863	7.93003	8.89197	7.89002	5.18773	8.30282	3	3	6			-2.24452	-0.721279	-0.300611	-1.47783	-3.99928	-0.951381		-1.61582						-4.87377	-1.50032	-0.592541	-2.95746	-8.06828	-1.94991			-4.87377	-1.50032	-0.592541	-2.95746	-8.06828	-1.94991		0.642104		-2.00301	1.20853	0.432711
Q5JKB0	10.7036	9.20381	10.7874	11.4366	11.2779	8.71428	3	3	6			1.47283	0.552506	1.59484	2.06871	2.09086	-0.539923		1.20664						3.19812	1.14925	3.14361	4.13994	4.21818	-1.1066			3.19812	1.14925	3.14361	4.13994	4.21818	-1.1066		0.255317		-0.0798252	0.0465077	0.968277
Q5JKF2	10.8389	10.7223	11.2098	11.4579	10.7232	10.6792	3	3	6			1.60808	2.07099	2.01718	2.09005	1.53623	1.42501		1.79126						3.4918	4.30781	3.97611	4.18264	3.09924	2.92065			3.4918	4.30781	3.97611	4.18264	3.09924	2.92065		0.530607		-0.524394	1.65329	0.317915
Q5JKN1	7.77808	9.98613	9.15722	8.96477	9.17779	7.23946	3	3	6			-1.45274	1.33482	-0.0353566	-0.403074	-0.00921176	-2.01475		-0.430051						-3.15449	2.77653	-0.0696922	-0.806639	-0.0185841	-4.12934			-3.15449	2.77653	-0.0696922	-0.806639	-0.0185841	-4.12934		0.702114		-1.5023	0.946827	0.518772
Q5JKW1	9.57505	10.684	11.4446	10.6372	11.7414	11.2971	3	3	6			0.344235	2.03265	2.25202	1.26932	2.55442	2.04289		1.74926						0.747476	4.22807	4.43901	2.54019	5.15338	4.18702			0.747476	4.22807	4.43901	2.54019	5.15338	4.18702		0.577735		0.822008	0.752589	0.593537
Q5JL08	8.60611	11.6361	9.34085	9.18023	8.94688	9.64956	3	3	6			-0.624704	2.98482	0.148274	-0.187615	-0.240128	0.395359		0.412668						-1.35649	6.20865	0.292267	-0.37546	-0.484443	0.810312			-1.35649	6.20865	0.292267	-0.37546	-0.484443	0.810312		0.0631188		-1.73134	1.00177	0.499388
Q5JL96	8.57225	7.53013	9.415	11.4136	9.3276	9.35381	3	3	6			-0.658567	-1.12117	0.222425	2.04573	0.140593	0.0996061		0.121435						-1.43002	-2.33213	0.438427	4.09395	0.283636	0.204149			-1.43002	-2.33213	0.438427	4.09395	0.283636	0.204149		0.575502		2.63515	2.66023	0.158195
Q5JLA7	5.31524	7.55834	8.88554	8.46082	6.81698	8.39421	3	3	6			-3.91557	-1.09296	-0.307033	-0.907023	-2.37002	-0.859997		-1.57544						-8.50232	-2.27345	-0.6052	-1.81515	-4.78137	-1.76262			-8.50232	-2.27345	-0.6052	-1.81515	-4.78137	-1.76262		0.294009		1.00728	0.477187	0.718377
Q5JLD8	9.05566	7.69	9.47139	11.1344	9.4846	9.70807	3	3	6			-0.175151	-0.961309	0.278814	1.76651	0.297596	0.453864		0.276721						-0.380324	-1.9996	0.549575	3.53518	0.600382	0.930222			-0.380324	-1.9996	0.549575	3.53518	0.600382	0.930222		0.783364		2.29871	2.99324	0.125587
Q5JLP4	7.22824	5.22936	8.53951	8.70836	8.51499	8.11291	3	3	6			-2.00257	-3.42195	-0.653069	-0.659488	-0.672015	-1.14129		-1.42506						-4.34841	-7.11792	-1.28728	-1.31978	-1.35575	-2.33915			-4.34841	-7.11792	-1.28728	-1.31978	-1.35575	-2.33915		0.0756908		2.57964	2.26997	0.207335
Q5JLQ9	7.50271	6.93381	9.48224	9.00576	8.58706	9.34716	3	3	6			-1.7281	-1.7175	0.289666	-0.362083	-0.59994	0.0929539		-0.670834						-3.75242	-3.57253	0.570967	-0.724607	-1.21034	0.190515			-3.75242	-3.57253	0.570967	-0.724607	-1.21034	0.190515		0.155968		1.66985	1.64568	0.319595
Q5JLS2	11.2141	8.61191	5.48478	10.5332	9.19503	11.0824	3	3	6			1.98332	-0.039397	-3.70779	1.16538	0.00802264	1.82821		0.206292						4.30661	-0.0819488	-7.30851	2.33219	0.0161852	3.74703			4.30661	-0.0819488	-7.30851	2.33219	0.0161852	3.74703		0.186973		3.05975	1.1906	0.438122
Q5JLY8	11.9308	10.5661	10.5226	12.1047	11.2061	10.1825	3	3	6			2.69996	1.91484	1.33	2.73682	2.01909	0.928316		1.93817						5.86273	3.98302	2.6216	5.47697	4.07339	1.90264			5.86273	3.98302	2.6216	5.47697	4.07339	1.90264		0.899113		-0.338115	0.284182	0.821207
Q5JM04	10.6879	2.36491	9.54185	7.37365	10.0265	9.18688	3	3	6			1.45709	-6.2864	0.349274	-1.9942	0.839518	-0.0673206		-0.95034						3.16394	-13.0762	0.688462	-3.99083	1.69367	-0.137978			3.16394	-13.0762	0.688462	-3.99083	1.69367	-0.137978		0.198149		2.26288	0.529952	0.692578
Q5JM82	6.21585	7.04985	7.86641	4.30305	7.07361	7.08821	3	3	6			-3.01496	-1.60146	-1.32616	-5.0648	-2.1134	-2.166		-2.5478						-6.54672	-3.33116	-2.61403	-10.1358	-4.26365	-4.43934			-6.54672	-3.33116	-2.61403	-10.1358	-4.26365	-4.43934		0.564313		-2.11562	1.30287	0.405319
Q5JMF2	9.86504	9.81802	9.57756	8.93981	7.92807	6.60254	3	3	6			0.634225	1.16672	0.384984	-0.428034	-1.25893	-2.65166		-0.358783						1.37716	2.42686	0.75885	-0.856589	-2.53981	-5.43473			1.37716	2.42686	0.75885	-0.856589	-2.53981	-5.43473		0.234164		-4.46467	4.83987	0.0349185
Q5JMF3	11.0652	10.5392	10.7833	11.5758	10.6475	10.9371	3	3	6			1.8344	1.88785	1.59075	2.20797	1.46054	1.68288		1.7774						3.98324	3.92687	3.13556	4.41864	2.94655	3.44916			3.98324	3.92687	3.13556	4.41864	2.94655	3.44916		0.572674		-0.0771075	0.172264	0.887449
Q5JMH0	11.7866	9.58013	15.5613	11.2671	9.24093	9.36091	3	3	6			2.55582	0.92882	6.36871	1.89929	0.0539294	0.106711		1.98555						5.54975	1.93202	12.5535	3.8009	0.108799	0.21871			5.54975	1.93202	12.5535	3.8009	0.108799	0.21871		0.262875		-5.30229	2.41012	0.188141
Q5JMM1	12.2051	9.55075	11.3856	9.92658	9.26536	11.3786	3	3	6			2.97428	0.89944	2.19302	0.55873	0.0783522	2.12442		1.47137						6.45838	1.8709	4.3227	1.11814	0.15807	4.35412			6.45838	1.8709	4.3227	1.11814	0.15807	4.35412		0.956823		-2.34055	1.88259	0.271196
Q5JN07	11.3987	5.52246	10.4093	9.59107	8.28267	8.24117	3	3	6			2.16788	-3.12884	1.21671	0.223226	-0.904334	-1.01303		-0.239733						4.70736	-6.50823	2.39828	0.446723	-1.82443	-2.07626			4.70736	-6.50823	2.39828	0.446723	-1.82443	-2.07626		0.104372		-1.35046	0.473594	0.720168
Q5JN42	10.141	8.22173	9.44062	10.9175	6.29563	9.96737	3	3	6			0.910145	-0.429575	0.248043	1.54967	-2.89137	0.713168		0.0166801						1.9763	-0.893549	0.488922	3.10124	-5.83316	1.46168			1.9763	-0.893549	0.488922	3.10124	-5.83316	1.46168		0.166924		-0.947306	0.400169	0.75777
Q5JN63	9.01458	10.827	11.2813	10.8329	11.479	10.6829	3	3	6			-0.216234	2.17572	2.08872	1.46504	2.29197	1.4287		1.53899						-0.469533	4.52566	4.11711	2.93187	4.6239	2.92822			-0.469533	4.52566	4.11711	2.93187	4.6239	2.92822		0.221153		0.770248	0.570008	0.673613
Q5JNA1	10.3614	8.727	9.94105	9.67094	9.79756	11.5007	3	3	6			1.13058	0.0756944	0.74847	0.303092	0.610559	2.24649		0.852481						2.45496	0.15745	1.47533	0.606553	1.23176	4.60432			2.45496	0.15745	1.47533	0.606553	1.23176	4.60432		0.446504		0.784965	0.720015	0.607091
Q5JNT2	8.73927	7.35288	7.41202	8.51258	8.11228	10.5723	3	3	6			-0.491538	-1.29843	-1.78056	-0.855265	-1.07472	1.31812		-0.697065						-1.06733	-2.70082	-3.5097	-1.71157	-2.16818	2.70156			-1.06733	-2.70082	-3.5097	-1.71157	-2.16818	2.70156		0.352566		2.03322	1.73503	0.300402
Q5K5B6	9.44892	6.49015	8.14588	10.9511	10.3615	6.17832	3	3	6			0.218109	-2.16115	-1.0467	1.58329	1.1745	-3.07589		-0.551306						0.473604	-4.49536	-2.06316	3.16851	2.36948	-6.30421			0.473604	-4.49536	-2.06316	3.16851	2.36948	-6.30421		0.365579		1.7729	0.677638	0.625188
Q5KQF5	7.48277	10.2358	10.4577	9.31796	9.44603	11.0753	3	3	6			-1.74804	1.58447	1.26511	-0.0498926	0.259024	1.82114		0.521968						-3.79573	3.29581	2.49369	-0.0998461	0.522564	3.73254			-3.79573	3.29581	2.49369	-0.0998461	0.522564	3.73254		0.438057		0.720495	0.339124	0.790521
Q5KQH7	7.51436	8.31211	9.8799	12.1906	12.2417	11.4386	3	3	6			-1.71645	-0.339196	0.687328	2.82275	3.05471	2.18443		1.1156						-3.72713	-0.705553	1.35481	5.64894	6.16268	4.47713			-3.72713	-0.705553	1.35481	5.64894	6.16268	4.47713		0.205048		6.45554	6.12496	0.0143286
Q5KQI4	7.90731	6.76394	10.0215	11.468	8.42643	8.14185	3	3	6			-1.3235	-1.88736	0.828958	2.10017	-0.760573	-1.11235		-0.359111						-2.87387	-3.92586	1.63398	4.20289	-1.53441	-2.27983			-2.87387	-3.92586	1.63398	4.20289	-1.53441	-2.27983		0.818842		1.85147	0.928348	0.52546
Q5KQL9	12.9647	10.4744	9.18847	12.4568	11.3751	10.5797	3	3	6			3.73393	1.82311	-0.00411199	3.08892	2.18814	1.32549		2.02591						8.10789	3.7922	-0.00810523	6.1816	4.41444	2.71667			8.10789	3.7922	-0.00810523	6.1816	4.41444	2.71667		0.308018		0.473574	0.214828	0.861649
Q5KQN0	7.96659	6.17023	6.57513	7.31025	8.80884	9.9952	3	3	6			-1.26422	-2.48108	-2.61745	-2.0576	-0.37817	0.740999		-1.34292						-2.74514	-5.16084	-5.1593	-4.11771	-0.762933	1.51872			-2.74514	-5.16084	-5.1593	-4.11771	-0.762933	1.51872		0.389483		3.23446	2.7285	0.150883
Q5KS50	9.82474	10.2557	11.2841	11.7824	9.77964	10.8147	3	3	6			0.593923	1.60443	2.09149	2.41454	0.592632	1.56046		1.47625						1.28965	3.33734	4.12259	4.83202	1.1956	3.19826			1.28965	3.33734	4.12259	4.83202	1.1956	3.19826		0.784102		0.158764	0.132954	0.911962
Q5MBR5	9.54388	8.62048	7.71596	9.05783	8.92443	7.59842	3	3	6			0.31307	-0.0308307	-1.47662	-0.310019	-0.262578	-1.65578		-0.570458						0.679804	-0.0641301	-2.91059	-0.620415	-0.529735	-3.39362			0.679804	-0.0641301	-2.91059	-0.620415	-0.529735	-3.39362		0.849228		-0.749617	0.66498	0.630697
Q5MBR6	5.63883	5.49112	9.26454	10.7807	5.83998	9.18031	3	3	6			-3.59199	-3.16019	0.0719592	1.41286	-3.34702	-0.0738954		-1.44805						-7.79968	-6.57344	0.14184	2.82743	-6.7524	-0.151453			-7.79968	-6.57344	0.14184	2.82743	-6.7524	-0.151453		0.863903		3.38495	1.25708	0.418391
Q5MGA9	10.3725	9.02547	10.391	11.976	12.1694	8.93463	3	3	6			1.14173	0.374165	1.19845	2.60811	2.98236	-0.319568		1.33087						2.47916	0.778291	2.36229	5.21939	6.01671	-0.654974			2.47916	0.778291	2.36229	5.21939	6.01671	-0.654974		0.127321		1.6538	1.03152	0.489196
Q5N6V0	10.5777	8.24774	9.86023	11.9944	10.0222	9.564	3	3	6			1.3469	-0.403569	0.667656	2.62658	0.835224	0.309795		0.897097						2.92467	-0.839455	1.31603	5.25635	1.68501	0.634943			2.92467	-0.839455	1.31603	5.25635	1.68501	0.634943		0.756044		1.39169	1.06946	0.476497
Q5N6V8	11.4191	9.76671	6.87529	12.101	9.1514	9.18259	3	3	6			2.1883	1.1154	-2.31729	2.73318	-0.0356079	-0.0716094		0.602063						4.75171	2.32013	-4.56766	5.46968	-0.0718366	-0.146768			4.75171	2.32013	-4.56766	5.46968	-0.0718366	-0.146768		0.615011		0.915633	0.324892	0.798358
Q5N712	10.5891	10.6381	11.0608	12.4451	10.1549	11.483	3	3	6			1.35828	1.98677	1.86819	3.07724	0.96794	2.22876		1.91453						2.94938	4.13263	3.68242	6.15824	1.95276	4.56797			2.94938	4.13263	3.68242	6.15824	1.95276	4.56797		0.14661		0.638181	0.637968	0.642618
Q5N725	14.5231	13.2606	12.6835	15.735	13.8057	14.4791	3	3	6			5.29226	4.60933	3.4909	6.36715	4.61874	5.22495		4.93389						11.4917	9.58776	6.88099	12.7421	9.31801	10.7088			11.4917	9.58776	6.88099	12.7421	9.31801	10.7088		0.711668		1.60283	1.35597	0.390672
Q5N749	10.4859	11.0511	12.331	12.1083	12.0969	12.0332	3	3	6			1.25512	2.39977	3.13842	2.74042	2.90987	2.77898		2.5371						2.72538	4.9917	6.18621	5.48417	5.87049	5.69569			2.72538	4.9917	6.18621	5.48417	5.87049	5.69569		0.0239309		1.04902	1.28612	0.410054
Q5N7A7	10.7896	7.61353	8.44613	10.1844	8.86623	12.2357	3	3	6			1.5588	-1.03778	-0.746445	0.816532	-0.320777	2.98154		0.54198						3.3848	-2.15865	-1.47133	1.63406	-0.647147	6.11085			3.3848	-2.15865	-1.47133	1.63406	-0.647147	6.11085		0.871665		2.44765	1.29778	0.406753
Q5N7C7	7.10727	5.15991	8.42421	9.06843	8.27076	9.75694	3	3	6			-2.12354	-3.4914	-0.768369	-0.299419	-0.916242	0.502737		-1.18271						-4.61109	-7.26237	-1.51455	-0.599203	-1.84846	1.03039			-4.61109	-7.26237	-1.51455	-0.599203	-1.84846	1.03039		0.402321		3.99024	3.34689	0.0982844
Q5N7W3	10.0226	9.45878	10.8911	11.3656	9.86228	8.10219	3	3	6			0.791833	0.807469	1.69852	1.99776	0.675276	-1.15202		0.803141						1.71939	1.6796	3.34799	3.99796	1.36233	-2.36113			1.71939	1.6796	3.34799	3.99796	1.36233	-2.36113		0.163076		-1.24927	0.858067	0.551691
Q5N7W4	10.4022	9.4588	9.36696	12.6799	10.6649	11.2171	3	3	6			1.17135	0.807489	0.174379	3.31207	1.47789	1.96291		1.48435						2.54348	1.67964	0.343722	6.62818	2.98154	4.0231			2.54348	1.67964	0.343722	6.62818	2.98154	4.0231		0.516471		3.02199	3.74939	0.074357
Q5N800	6.10415	8.05365	8.27822	10.3742	9.91601	8.97728	3	3	6			-3.12666	-0.597653	-0.91436	1.00632	0.729009	-0.276922		-0.530045						-6.78928	-1.24316	-1.80231	2.01387	1.47073	-0.567569			-6.78928	-1.24316	-1.80231	2.01387	1.47073	-0.567569		0.331472		4.25059	3.43566	0.0924192
Q5N808	6.55485	9.02829	9.96212	9.13656	9.0872	6.41168	3	3	6			-2.67596	0.376986	0.769538	-0.231292	-0.0998074	-2.84252		-0.783843						-5.81062	0.784159	1.51685	-0.462867	-0.201355	-5.82592			-5.81062	0.784159	1.51685	-0.462867	-0.201355	-5.82592		0.764497		-0.993512	0.406677	0.754359
Q5N829	10.473	10.7693	12.4946	11.0711	11.9975	9.24375	3	3	6			1.24218	2.11795	3.30203	1.70328	2.81046	-0.0104571		1.86091						2.69729	4.4055	6.5087	3.40864	5.66992	-0.0214325			2.69729	4.4055	6.5087	3.40864	5.66992	-0.0214325		0.614808		-1.51812	1.03612	0.487636
Q5N855	10.0463	8.08847	9.34862	6.34919	8.23917	8.59965	3	3	6			0.815493	-0.562837	0.15604	-3.01866	-0.947836	-0.65455		-0.702058						1.77077	-1.17074	0.307574	-6.041	-1.9122	-1.34154			1.77077	-1.17074	0.307574	-6.041	-1.9122	-1.34154		0.495033		-3.40078	3.09399	0.117116
Q5N863	10.3113	6.13584	12.244	12.8013	10.1922	9.70895	3	3	6			1.08048	-2.51546	3.0514	3.43348	1.00516	0.454744		1.08497						2.34617	-5.23236	6.01468	6.87114	2.02785	0.932024			2.34617	-5.23236	6.01468	6.87114	2.02785	0.932024		0.465813		2.23418	0.770147	0.586358
Q5N870	11.6334	10.3962	10.7049	11.6761	10.7108	11.2962	3	3	6			2.40259	1.74487	1.51236	2.30824	1.5238	2.04197		1.92231						5.21702	3.62946	2.98105	4.6193	3.07417	4.18514			5.21702	3.62946	2.98105	4.6193	3.07417	4.18514		0.648512		0.0170252	0.0229801	0.984198
Q5N897	8.2555	8.76785	8.37756	10.9516	12.5024	11.0782	3	3	6			-0.975312	0.116546	-0.81502	1.5838	3.31543	1.82402		0.841577						-2.1178	0.242425	-1.6065	3.16953	6.68866	3.73843			-2.1178	0.242425	-1.6065	3.16953	6.68866	3.73843		0.603385		5.69284	6.37536	0.0120456
Q5N8F2	7.52168	8.89236	9.33396	11.4899	9.03039	10.536	3	3	6			-1.70913	0.241054	0.141383	2.12205	-0.156614	1.28175		0.320082						-3.71123	0.50141	0.278683	4.24669	-0.315958	2.62703			-3.71123	0.50141	0.278683	4.24669	-0.315958	2.62703		0.97549		3.16297	2.52739	0.173452
Q5N8J3	9.75422	9.38219	2.56172	8.12933	11.8395	9.13127	3	3	6			0.523407	0.730885	-6.63086	-1.23851	2.65251	-0.122937		-0.680918						1.13653	1.5203	-13.0702	-2.47854	5.35128	-0.251967			1.13653	1.5203	-13.0702	-2.47854	5.35128	-0.251967		0.381095		4.34472	1.11649	0.461213
Q5N8Q4	12.4202	10.3325	5.3559	8.83292	10.6259	9.71739	3	3	6			3.18938	1.68118	-3.83668	-0.534926	1.43889	0.463183		0.400171						6.92547	3.49698	-7.56256	-1.0705	2.90286	0.949321			6.92547	3.49698	-7.56256	-1.0705	2.90286	0.949321		0.128836		-0.0260686	0.00625472	0.995674
Q5N8X6	11.4864	10.2759	11.2979	10.8774	10.6958	12.0005	3	3	6			2.25562	1.62458	2.10531	1.50959	1.50883	2.74633		1.95838						4.89788	3.37926	4.14983	3.02102	3.04397	5.62876			4.89788	3.37926	4.14983	3.02102	3.04397	5.62876		0.408413		-0.244405	0.297761	0.813514
Q5N8Z0	8.78509	6.10819	8.31188	5.4931	10.178	13.6498	3	3	6			-0.44572	-2.54312	-0.880693	-3.87474	0.991037	4.39562		-0.392937						-0.967841	-5.28988	-1.73595	-7.75421	1.99935	9.00908			-0.967841	-5.28988	-1.73595	-7.75421	1.99935	9.00908		0.139554		3.7493	1.00511	0.498233
Q5N941	10.0178	9.92564	11.5585	13.1362	13.2299	12.8652	3	3	6			0.78697	1.27434	2.36589	3.76837	4.04287	3.61095		2.64156						1.70884	2.65072	4.66346	7.54134	8.15622	7.40086			1.70884	2.65072	4.66346	7.54134	8.15622	7.40086		0.132325		4.6918	7.26479	0.0065025
Q5N942	9.94348	10.9247	10.6738	12.0814	10.4126	11.739	3	3	6			0.712669	2.27343	1.48126	2.71357	1.22556	2.48478		1.81521						1.5475	4.72891	2.91975	5.43045	2.4725	5.0927			1.5475	4.72891	2.91975	5.43045	2.4725	5.0927		0.98544		1.2665	1.3614	0.389205
Q5N9Q7	5.94799	10.7215	7.5598	10.8379	10.7936	10.8708	3	3	6			-3.28282	2.07022	-1.63278	1.47002	1.6066	1.61662		0.307977						-7.12835	4.30621	-3.21841	2.94183	3.24121	3.31337			-7.12835	4.30621	-3.21841	2.94183	3.24121	3.31337		0.00229565		5.17898	1.929	0.262611
Q5N9W4	13.2843	6.24884	5.29851	5.96405	5.30001	5.0682	3	3	6			4.05353	-2.40247	-3.89407	-3.4038	-3.88699	-4.186		-2.28663						8.80189	-4.99732	-7.67567	-6.81174	-7.84175	-8.57947			8.80189	-4.99732	-7.67567	-6.81174	-7.84175	-8.57947		0.0199649		-6.45395	1.58531	0.333253
Q5NA18	8.58056	6.25963	8.01942	12.631	12.5471	12.4162	3	3	6			-0.650253	-2.39168	-1.17315	3.26312	3.36013	3.16199		0.92836						-1.41197	-4.97487	-2.31243	6.53023	6.77885	6.48068			-1.41197	-4.97487	-2.31243	6.53023	6.77885	6.48068		0.0147654		9.49634	6.38338	0.0119788
Q5NAI4	6.49662	6.96659	7.50239	7.82858	12.3726	8.50466	3	3	6			-2.73419	-1.68472	-1.69018	-1.53927	3.18562	-0.749542		-0.868714						-5.93705	-3.50434	-3.33156	-3.08041	6.42677	-1.53623			-5.93705	-3.50434	-3.33156	-3.08041	6.42677	-1.53623		0.150803		4.86103	2.41317	0.187743
Q5NAI7	10.2052	8.44352	7.77393	9.49809	9.62659	10.684	3	3	6			0.97437	-0.207783	-1.41865	0.130243	0.43958	1.42984		0.224601						2.11576	-0.432205	-2.79632	0.260646	0.886825	2.93055			2.11576	-0.432205	-2.79632	0.260646	0.886825	2.93055		0.488334		1.73026	1.52007	0.348668
Q5NAN5	6.71521	9.8595	9.62388	8.04199	11.5203	6.96405	3	3	6			-2.51561	1.2082	0.431304	-1.32586	2.33332	-2.29015		-0.359799						-5.46242	2.51314	0.850153	-2.65334	4.70732	-4.6938			-5.46242	2.51314	0.850153	-2.65334	4.70732	-4.6938		0.839886		-0.180231	0.0529572	0.963958
Q5NAT8	3.45602	7.62804	7.57213	6.27268	6.88753	8.12717	3	3	6			-5.7748	-1.02326	-1.62045	-3.09517	-2.29948	-1.12703		-2.49003						-12.5395	-2.12846	-3.19409	-6.19412	-4.63905	-2.30992			-12.5395	-2.12846	-3.19409	-6.19412	-4.63905	-2.30992		0.208654		1.57298	0.565069	0.675923
Q5NAV3	2.92594	9.84383	8.65048	2.51949	8.7998	6.24897	3	3	6			-6.30487	1.19252	-0.5421	-6.84836	-0.387205	-3.00523		-2.64921						-13.6905	2.48053	-1.06854	-13.7051	-0.781162	-6.1594			-13.6905	2.48053	-1.06854	-13.7051	-0.781162	-6.1594		0.736965		-2.78905	0.567245	0.674904
Q5NAW2	5.90159	6.87627	7.90479	5.74012	4.83698	9.33441	3	3	6			-3.32922	-1.77504	-1.28779	-3.62773	-4.35002	0.080205		-2.3816						-7.22911	-3.69221	-2.53839	-7.25988	-8.77589	0.164385			-7.22911	-3.69221	-2.53839	-7.25988	-8.77589	0.164385		0.413924		-0.80389	0.307035	0.808301
Q5NAZ7	8.56232	6.60569	10.5881	11.6482	7.78738	7.55666	3	3	6			-0.668494	-2.04562	1.39548	2.28033	-1.39962	-1.69754		-0.355912						-1.45158	-4.25505	2.75066	4.56344	-2.82365	-3.47922			-1.45158	-4.25505	2.75066	4.56344	-2.82365	-3.47922		0.76794		0.40551	0.139681	0.90772
Q5NB25	7.75716	7.05344	7.29499	8.11541	8.00085	10.6073	3	3	6			-1.47366	-1.59787	-1.89759	-1.25244	-1.18616	1.35313		-1.0091						-3.19991	-3.32369	-3.74038	-2.50641	-2.393	2.77332			-3.19991	-3.32369	-3.74038	-2.50641	-2.393	2.77332		0.0174736		2.71263	1.94915	0.258968
Q5NBI2	11.5758	7.23525	9.33731	9.0124	10.5042	8.4138	3	3	6			2.34501	-1.41606	0.144732	-0.355447	1.31722	-0.840405		0.199175						5.09198	-2.94551	0.285285	-0.711327	2.6574	-1.72246			5.09198	-2.94551	0.285285	-0.711327	2.6574	-1.72246		0.486577		-0.736048	0.326435	0.797505
Q5NBJ3	9.87018	8.59835	10.4549	11.4738	9.59173	11.138	3	3	6			0.639367	-0.0529568	1.26234	2.10591	0.404723	1.88375		1.04052						1.38833	-0.110154	2.48822	4.21438	0.816503	3.86086			1.38833	-0.110154	2.48822	4.21438	0.816503	3.86086		0.655427		1.70845	1.92234	0.263826
Q5NBM0	11.1257	6.81558	5.48858	6.8658	10.2223	10.0498	3	3	6			1.89492	-1.83573	-3.704	-2.50205	1.03531	0.795646		-0.719318						4.11466	-3.81846	-7.30103	-5.00716	2.08867	1.63072			4.11466	-3.81846	-7.30103	-5.00716	2.08867	1.63072		0.630807		1.90569	0.588708	0.664938
Q5NBN9	10.2423	10.0532	10.4396	10.8506	10.4454	11.7504	3	3	6			1.01153	1.40194	1.24705	1.48273	1.25842	2.49617		1.48297						2.19644	2.91614	2.45808	2.96727	2.53879	5.11605			2.19644	2.91614	2.45808	2.96727	2.53879	5.11605		0.130111		1.01715	1.81139	0.284915
Q5NBP9	7.89966	8.62062	7.34899	6.7339	6.80103	6.91253	3	3	6			-1.33115	-0.030684	-1.84358	-2.63395	-2.38598	-2.34167		-1.76117						-2.89048	-0.0638251	-3.63393	-5.27111	-4.81355	-4.7994			-2.89048	-0.0638251	-3.63393	-5.27111	-4.81355	-4.7994		0.0397855		-2.76528	3.01942	0.123329
Q5NBT9	11.1095	9.80153	11.368	10.5291	9.00504	9.75889	3	3	6			1.87869	1.15022	2.17544	1.16129	-0.18197	0.504687		1.11473						4.07941	2.39255	4.28805	2.324	-0.367113	1.03439			4.07941	2.39255	4.28805	2.324	-0.367113	1.03439		0.747143		-2.58958	4.11458	0.0577284
Q5NTH4	10.2875	8.07071	10.972	8.19071	12.7147	10.3713	3	3	6			1.05667	-0.580596	1.77947	-1.17713	3.52767	1.11714		0.953869						2.29446	-1.20768	3.50755	-2.3557	7.11685	2.28964			2.29446	-1.20768	3.50755	-2.3557	7.11685	2.28964		0.421737		0.818819	0.315815	0.803397
Q5PP28	7.65213	8.86115	10.0448	10.3784	6.66249	9.97685	3	3	6			-1.57868	0.209842	0.852227	1.01056	-2.52451	0.722648		-0.217988						-3.42797	0.436487	1.67984	2.02234	-5.09305	1.48111			-3.42797	0.436487	1.67984	2.02234	-5.09305	1.48111		0.62277		-0.092649	0.0368333	0.974792
Q5QLS7	11.3213	10.1874	7.29306	11.0766	9.15596	10.8329	3	3	6			2.09044	1.53604	-1.89952	1.70877	-0.0310484	1.57869		0.830562						4.5392	3.19509	-3.74418	3.41962	-0.0626381	3.23561			4.5392	3.19509	-3.74418	3.41962	-0.0626381	3.23561		0.325372		0.867494	0.3723	0.77255
Q5QM25	10.2003	10.0456	10.7021	8.18234	9.84746	7.50795	3	3	6			0.969473	1.39432	1.50951	-1.1855	0.66046	-1.74625		0.267001						2.10513	2.90028	2.97542	-2.37245	1.33243	-3.57904			2.10513	2.90028	2.97542	-2.37245	1.33243	-3.57904		0.0685673		-4.19996	4.34646	0.0491568
Q5QM84	9.19803	10.3006	9.72792	9.41409	10.3584	10.3814	3	3	6			-0.0327851	1.64927	0.535343	0.0462454	1.17143	1.12723		0.749456						-0.0711899	3.43062	1.05523	0.0925471	2.36328	2.31033			-0.0711899	3.43062	1.05523	0.0925471	2.36328	2.31033		0.68903		0.117168	0.102856	0.931187
Q5QMM3	7.59634	3.74814	7.27184	8.10355	6.48639	7.77353	3	3	6			-1.63447	-4.90317	-1.92074	-1.2643	-2.70061	-1.48067		-2.31733						-3.54912	-10.199	-3.78601	-2.53014	-5.44831	-3.03472			-3.54912	-10.199	-3.78601	-2.53014	-5.44831	-3.03472		0.291921		2.17364	1.2912	0.408611
Q5QMN3	5.87809	8.39124	7.13453	10.7077	9.80948	10.6963	3	3	6			-3.35272	-0.260064	-2.05805	1.33986	0.622474	1.44207		-0.377739						-7.28015	-0.540952	-4.05666	2.68135	1.2558	2.95561			-7.28015	-0.540952	-4.05666	2.68135	1.2558	2.95561		0.136589		6.25684	4.79181	0.0361012
Q5QMN4	10.825	10.699	11.1264	11.2722	9.68717	10.6389	3	3	6			1.59423	2.04766	1.93387	1.90437	0.500161	1.38469		1.56083						3.46172	4.25928	3.81189	3.81107	1.00904	2.838			3.46172	4.25928	3.81189	3.81107	1.00904	2.838		0.146371		-1.2916	2.289	0.204618
Q5QMN5	11.0336	9.22333	10.7758	10.4623	11.8907	10.0469	3	3	6			1.80282	0.572019	1.5832	1.09445	2.70368	0.792649		1.4248						3.91466	1.18984	3.12067	2.19023	5.45449	1.62458			3.91466	1.18984	3.12067	2.19023	5.45449	1.62458		0.629664		0.348045	0.284304	0.821138
Q5QMT0	9.7034	9.38847	9.17597	10.6652	8.11832	8.55547	3	3	6			0.472589	0.737162	-0.0166036	1.2974	-1.06869	-0.698731		0.120522						1.02619	1.53335	-0.0327277	2.59638	-2.15601	-1.43209			1.02619	1.53335	-0.0327277	2.59638	-2.15601	-1.43209		0.177495		-1.17284	1.02618	0.49101
Q5QN75	7.79435	8.53415	7.05582	11.5289	10.2311	9.35907	3	3	6			-1.43646	-0.11716	-2.13675	2.16109	1.0441	0.104866		-0.0633862						-3.11915	-0.243701	-4.2118	4.32482	2.1064	0.21493			-3.11915	-0.243701	-4.2118	4.32482	2.1064	0.21493		0.996395		4.74027	4.39669	0.047475
Q5QNA6	9.12089	8.52869	7.47119	11.0748	9.29211	11.5129	3	3	6			-0.109927	-0.122619	-1.72139	1.70696	0.10511	2.25869		0.352804						-0.238696	-0.255056	-3.39307	3.41601	0.212052	4.62931			-0.238696	-0.255056	-3.39307	3.41601	0.212052	4.62931		0.775654		4.04806	3.75534	0.0740507
Q5QNI1	11.0309	10.3593	8.73033	11.4348	9.74371	10.5087	3	3	6			1.80013	1.708	-0.462243	2.06699	0.556702	1.25448		1.15401						3.90882	3.55278	-0.911137	4.1365	1.12311	2.57114			3.90882	3.55278	-0.911137	4.1365	1.12311	2.57114		0.478894		0.426761	0.282568	0.822126
Q5QNI2	7.3156	6.37043	8.33105	6.42292	7.8674	7.91701	3	3	6			-1.91521	-2.28088	-0.861526	-2.94493	-1.3196	-1.33719		-1.77656						-4.15871	-4.74441	-1.69817	-5.89344	-2.66221	-2.74065			-4.15871	-4.74441	-1.69817	-5.89344	-2.66221	-2.74065		0.869391		-0.231671	0.187827	0.877927
Q5QNI5	12.4039	10.8554	17.0963	17.0627	11.7311	17.3496	3	3	6			3.1731	2.20411	7.90373	7.69481	2.5441	8.09537		5.2692						6.89012	4.58471	15.5792	15.399	5.13256	16.592			6.89012	4.58471	15.5792	15.399	5.13256	16.592		0.917136		3.3565	0.904042	0.534388
Q5QNM6	13.4684	10.4043	10.102	11.6939	9.56771	11.1864	3	3	6			4.23756	1.75298	0.909398	2.32607	0.380704	1.93222		1.92316						9.20148	3.64634	1.79253	4.65499	0.768046	3.9602			9.20148	3.64634	1.79253	4.65499	0.768046	3.9602		0.448482		-1.75237	0.926237	0.526229
Q5SML4	9.10562	9.01058	10.1317	10.2525	11.2358	11.2586	3	3	6			-0.125192	0.359277	0.939151	0.884699	2.04877	2.00436		1.01851						-0.271844	0.747323	1.85118	1.77048	4.13326	4.10806			-0.271844	0.747323	1.85118	1.77048	4.13326	4.10806		0.759531		2.56171	4.01999	0.0616399
Q5SML5	8.90551	9.24058	9.20477	11.4417	8.18611	11.2457	3	3	6			-0.325305	0.58927	0.0121895	2.07385	-1.00089	1.99147		0.556764						-0.706372	1.22573	0.0240271	4.15023	-2.01923	4.08164			-0.706372	1.22573	0.0240271	4.15023	-2.01923	4.08164		0.141005		1.88975	1.24007	0.423353
Q5SMQ9	8.36733	9.70672	9.26334	10.246	10.219	10.2334	3	3	6			-0.863485	1.05541	0.0707624	0.87818	1.03204	0.979178		0.525348						-1.87498	2.19534	0.139481	1.75743	2.08208	2.00688			-1.87498	2.19534	0.139481	1.75743	2.08208	2.00688		0.0138481		1.79552	1.91263	0.265607
Q5SMU7	9.49253	10.4091	11.1203	10.4977	10.3477	11.9717	3	3	6			0.261722	1.75777	1.92773	1.1298	1.16073	2.71748		1.49254						0.568305	3.65629	3.79978	2.26099	2.34169	5.56965			0.568305	3.65629	3.79978	2.26099	2.34169	5.56965		0.96677		0.715985	0.596515	0.66135
Q5SN53	7.85462	8.85428	9.55065	10.0444	10.1653	10.4906	3	3	6			-1.37619	0.202969	0.358073	0.676546	0.978279	1.23635		0.346004						-2.98828	0.422191	0.705806	1.35392	1.97361	2.53397			-2.98828	0.422191	0.705806	1.35392	1.97361	2.53397		0.152324		2.57393	3.24467	0.105501
Q5SNL7	9.94596	9.96708	10.4048	8.57852	10.331	10.6546	3	3	6			0.715143	1.31578	1.21225	-0.789324	1.14402	1.40043		0.833049						1.55287	2.73691	2.38948	-1.57961	2.30799	2.87027			1.55287	2.73691	2.38948	-1.57961	2.30799	2.87027		0.118684		-1.02687	0.954951	0.515859
Q5SNN4	9.29016	9.94867	11.597	8.59965	10.5402	11.3526	3	3	6			0.0593445	1.29737	2.40445	-0.768195	1.35322	2.09839		1.0741						0.128861	2.69862	4.73946	-1.53733	2.73003	4.30078			0.128861	2.69862	4.73946	-1.53733	2.73003	4.30078		0.738041		-0.691153	0.379549	0.768678
Q5TKD8	8.89673	5.96199	6.29684	9.52736	6.27553	7.34136	3	3	6			-0.334087	-2.68931	-2.89573	0.159512	-2.91148	-1.91284		-1.76399						-0.72544	-5.59398	-5.70784	0.319218	-5.87372	-3.92048			-0.72544	-5.59398	-5.70784	0.319218	-5.87372	-3.92048		0.893243		0.850761	0.421563	0.746615
Q5TKG3	6.78542	8.13597	6.92172	11.0107	7.4417	4.97554	3	3	6			-2.44539	-0.515341	-2.27086	1.64289	-1.74531	-4.27866		-1.60211						-5.30995	-1.07195	-4.47613	3.28778	-3.52104	-8.76938			-5.30995	-1.07195	-4.47613	3.28778	-3.52104	-8.76938		0.242416		0.618466	0.190785	0.876129
Q5UG13	7.62139	10.0294	9.04483	8.5049	8.78676	9.97054	3	3	6			-1.60942	1.37812	-0.147746	-0.862949	-0.400245	0.716335		-0.154318						-3.49471	2.86659	-0.291225	-1.72695	-0.807469	1.46817			-3.49471	2.86659	-0.291225	-1.72695	-0.807469	1.46817		0.421998		-0.0489668	0.0258554	0.982238
Q5VMP0	11.3634	2.00795	10.6973	10.7421	4.6671	11.0966	3	3	6			2.13256	-6.64336	1.50474	1.37429	-4.51991	1.84245		-0.718205						4.63066	-13.8187	2.96602	2.75026	-9.11862	3.77621			4.63066	-13.8187	2.96602	2.75026	-9.11862	3.77621		0.66061		1.20995	0.193146	0.874696
Q5VMQ5	10.3675	9.72583	9.37966	11.8219	9.62317	11.5778	3	3	6			1.13671	1.07452	0.187083	2.45409	0.436163	2.32356		1.26869						2.46827	2.23508	0.368763	4.91116	0.879931	4.76227			2.46827	2.23508	0.368763	4.91116	0.879931	4.76227		0.404441		1.82708	1.81674	0.283862
Q5VN06	10.2963	11.3128	13.1081	11.3652	11.1508	11.5444	3	3	6			1.06553	2.66146	3.91547	1.99738	1.96376	2.29023		2.31564						2.3137	5.53604	7.71787	3.9972	3.96175	4.69397			2.3137	5.53604	7.71787	3.9972	3.96175	4.69397		0.0450886		-0.971568	0.735878	0.600453
Q5VN19	9.38802	5.85965	10.8157	9.97111	9.06242	10.0473	3	3	6			0.157205	-2.79166	1.62313	0.603265	-0.124581	0.793058		0.043402						0.341356	-5.80687	3.19938	1.20726	-0.251334	1.62542			0.341356	-5.80687	3.19938	1.20726	-0.251334	1.62542		0.0876495		1.61583	0.775752	0.584084
Q5VNU3	9.19148	11.9197	10.975	9.99095	10.478	11.4026	3	3	6			-0.0393338	3.26841	1.78241	0.623107	1.29096	2.14838		1.51232						-0.0854099	6.79855	3.51335	1.24697	2.60442	4.40324			-0.0854099	6.79855	3.51335	1.24697	2.60442	4.40324		0.349076		-0.657284	0.360609	0.778836
Q5VP69	9.23038	9.12267	7.40633	10.3391	8.30961	10.1178	3	3	6			-0.000431819	0.471366	-1.78624	0.971223	-0.877392	0.863571		-0.0596516						-0.000937657	0.980476	-3.5209	1.94363	-1.77008	1.76994			-0.000937657	0.980476	-3.5209	1.94363	-1.77008	1.76994		0.878902		1.49495	1.12419	0.458761
Q5VPE5	7.88807	11.5327	10.4428	9.67094	9.53823	8.82582	3	3	6			-1.34274	2.88139	1.25026	0.303092	0.351223	-0.428385		0.502474						-2.91564	5.99351	2.46442	0.606553	0.708569	-0.878001			-2.91564	5.99351	2.46442	0.606553	0.708569	-0.878001		0.0754002		-1.70172	0.851069	0.554374
Q5VQ09	12.3179	11.0301	12.2045	11.8295	12.0813	11.1729	3	3	6			3.08705	2.37881	3.01193	2.46168	2.89425	1.91873		2.62541						6.70326	4.9481	5.93688	4.92635	5.83895	3.93254			6.70326	4.9481	5.93688	4.92635	5.83895	3.93254		0.919876		-0.963466	1.90087	0.267781
Q5VQ78	11.7961	9.62825	11.6732	10.8595	12.2004	11.1943	3	3	6			2.56531	0.976938	2.48064	1.49161	3.01337	1.94006		2.07799						5.57034	2.03211	4.88965	2.98504	6.07929	3.97627			5.57034	2.03211	4.88965	2.98504	6.07929	3.97627		0.82926		0.182834	0.146334	0.903543
Q5VQG4	6.64429	7.94345	8.58233	9.67212	8.85331	5.99528	3	3	6			-2.58652	-0.707855	-0.610247	0.304277	-0.333695	-3.25892		-1.19883						-5.61641	-1.47239	-1.20287	0.608925	-0.673209	-6.67935			-5.61641	-1.47239	-1.20287	0.608925	-0.673209	-6.67935		0.575798		0.51601	0.224739	0.85575
Q5VQG8	8.6431	9.96272	9.367	11.438	11.1167	10.2119	3	3	6			-0.587714	1.31142	0.174422	2.07011	1.92973	0.957686		0.975942						-1.27617	2.72784	0.343808	4.14275	3.8931	1.96283			-1.27617	2.72784	0.343808	4.14275	3.8931	1.96283		0.519476		2.7344	3.14446	0.11309
Q5VQK9	6.65019	7.56049	9.10881	6.77887	6.50403	8.38927	3	3	6			-2.58062	-1.09082	-0.0837653	-2.58898	-2.68297	-0.864937		-1.64868						-5.60359	-2.26899	-0.165112	-5.18112	-5.41272	-1.77274			-5.60359	-2.26899	-0.165112	-5.18112	-5.41272	-1.77274		0.711567		-1.44296	0.985569	0.505026
Q5VQL1	8.98803	8.77436	9.50601	7.0492	9.50496	8.04439	3	3	6			-0.242781	0.123052	0.313433	-2.31865	0.317953	-1.20981		-0.502801						-0.527178	0.255957	0.617814	-4.64013	0.64145	-2.47957			-0.527178	0.255957	0.617814	-4.64013	0.64145	-2.47957		0.092664		-2.27495	2.17865	0.220882
Q5VQQ5	8.71497	7.80503	7.55044	8.29439	7.61353	8.33651	3	3	6			-0.515846	-0.846273	-1.64214	-1.07346	-1.57347	-0.917696		-1.09481						-1.12011	-1.76031	-3.23685	-2.14822	-3.17438	-1.88087			-1.12011	-1.76031	-3.23685	-2.14822	-3.17438	-1.88087		0.566998		-0.362066	0.620498	0.650446
Q5VQY3	9.30047	7.1372	6.03664	7.31306	8.62227	7.27901	3	3	6			0.0696544	-1.51411	-3.15594	-2.05478	-0.564733	-1.9752		-1.53252						0.151248	-3.14947	-6.22074	-4.11207	-1.13931	-4.04828			0.151248	-3.14947	-6.22074	-4.11207	-1.13931	-4.04828		0.442356		-0.0269019	0.0140299	0.990322
Q5VRH4	7.91683	7.80652	9.13018	9.60159	8.49997	5.74079	3	3	6			-1.31398	-0.84479	-0.0623928	0.233737	-0.68704	-3.51341		-1.03131						-2.85319	-1.75723	-0.122984	0.467759	-1.38606	-7.20094			-2.85319	-1.75723	-0.122984	0.467759	-1.38606	-7.20094		0.210941		-1.12861	0.581988	0.668043
Q5VRI5	10.0081	7.75429	9.91857	10.6593	11.4498	10.2961	3	3	6			0.777336	-0.897021	0.725988	1.29143	2.26281	1.04191		0.867077						1.68792	-1.86587	1.43101	2.58444	4.56508	2.13546			1.68792	-1.86587	1.43101	2.58444	4.56508	2.13546		0.597015		2.67731	3.04001	0.121581
Q5VRJ8	11.9522	9.93709	8.94632	10.3254	10.1609	11.6165	3	3	6			2.72135	1.28579	-0.246256	0.95757	0.973875	2.36225		1.34243						5.90916	2.67453	-0.4854	1.91631	1.96473	4.84158			5.90916	2.67453	-0.4854	1.91631	1.96473	4.84158		0.430726		0.208107	0.112069	0.92526
Q5VRM7	12.0813	10.2242	7.77142	10.7308	10.1499	10.9088	3	3	6			2.85044	1.57294	-1.42115	1.36296	0.962869	1.65457		1.16377						6.18947	3.27183	-2.80127	2.72759	1.94253	3.39113			6.18947	3.27183	-2.80127	2.72759	1.94253	3.39113		0.0487707		0.46707	0.189257	0.877058
Q5VRN0	12.6042	5.7582	10.9632	9.26791	10.3621	8.4735	3	3	6			3.37339	-2.89311	1.77061	-0.0999376	1.17505	-0.7807		0.424217						7.32503	-6.01789	3.49008	-0.199997	2.37058	-1.60009			7.32503	-6.01789	3.49008	-0.199997	2.37058	-1.60009		0.158285		-1.40891	0.414384	0.75034
Q5VRR0	6.37467	8.86885	9.0448	10.301	8.3583	6.02839	3	3	6			-2.85614	0.217546	-0.147773	0.933191	-0.828705	-3.22581		-0.984615						-6.20185	0.452513	-0.291279	1.86752	-1.67186	-6.61149			-6.20185	0.452513	-0.291279	1.86752	-1.67186	-6.61149		0.845951		-0.125071	0.0424133	0.971029
Q5VRW2	8.2744	4.51267	9.85708	7.60392	9.40723	9.67716	3	3	6			-0.956411	-4.13864	0.664502	-1.76392	0.22022	0.422953		-0.925216						-2.07676	-8.60868	1.30981	-3.53	0.44428	0.866868			-2.07676	-8.60868	1.30981	-3.53	0.44428	0.866868		0.37596		2.38559	0.996591	0.501183
Q5VRY0	10.0028	10.5089	11.5117	11.4935	10.0828	9.94193	3	3	6			0.772002	1.85758	2.31913	2.12561	0.895809	0.687726		1.44297						1.67634	3.8639	4.57128	4.25381	1.80724	1.40953			1.67634	3.8639	4.57128	4.25381	1.80724	1.40953		0.97967		-0.880312	0.947491	0.518533
Q5VRY1	7.71576	9.05007	7.28364	8.10303	9.66363	7.03155	3	3	6			-1.51506	0.398759	-1.90893	-1.26482	0.476624	-2.22265		-1.00601						-3.28981	0.829449	-3.76274	-2.53119	0.961559	-4.55546			-3.28981	0.829449	-3.76274	-2.53119	0.961559	-4.55546		0.900555		0.0326708	0.0163578	0.988726
Q5VS55	9.31497	9.37899	7.43396	7.57682	9.1645	8.50712	3	3	6			0.0841558	0.727681	-1.75862	-1.79102	-0.0225003	-0.747082		-0.584564						0.182737	1.51363	-3.46645	-3.58423	-0.0453929	-1.53119			0.182737	1.51363	-3.46645	-3.58423	-0.0453929	-1.53119		0.644037		-1.13025	0.821736	0.565761
Q5VSB7	10.9159	6.59119	7.17383	10.5331	10.6783	6.63823	3	3	6			1.68507	-2.06012	-2.01875	1.16529	1.49133	-2.61597		-0.392193						3.65897	-4.28521	-3.9792	2.332	3.00866	-5.36159			3.65897	-4.28521	-3.9792	2.332	3.00866	-5.36159		0.967504		1.52817	0.507431	0.703474
Q5W670	8.08661	9.05932	6.54083	8.95887	8.75348	6.81865	3	3	6			-1.1442	0.40801	-2.65174	-0.408976	-0.433521	-2.43556		-1.111						-2.48453	0.848692	-5.22691	-0.818451	-0.8746	-4.99182			-2.48453	0.848692	-5.22691	-0.818451	-0.8746	-4.99182		0.764531		0.0592909	0.0289891	0.980107
Q5W676	6.86851	10.0975	10.0949	10.4119	7.68152	10.8813	3	3	6			-2.3623	1.4462	0.902292	1.04409	-1.50549	1.62714		0.191989						-5.12952	3.0082	1.77853	2.08945	-3.03722	3.33492			-5.12952	3.0082	1.77853	2.08945	-3.03722	3.33492		0.744322		0.909981	0.340063	0.790007
Q5W6B9	10.8824	8.93855	8.66796	9.47202	10.1394	10.5128	3	3	6			1.6516	0.287243	-0.524614	0.104173	0.952418	1.25864		0.621576						3.58631	0.597488	-1.03408	0.208472	1.92144	2.57965			3.58631	0.597488	-1.03408	0.208472	1.92144	2.57965		0.428779		0.51995	0.414076	0.7505
Q5W6F1	10.6684	10.6274	9.68515	10.8883	10.1369	11.1037	3	3	6			1.43763	1.97604	0.492575	1.52044	0.949858	1.84954		1.37101						3.12169	4.11032	0.970924	3.04273	1.91628	3.79075			3.12169	4.11032	0.970924	3.04273	1.91628	3.79075		0.513635		0.182276	0.194978	0.873586
Q5W6F9	8.63005	9.98499	8.39202	7.77393	9.08103	8.71877	3	3	6			-0.600764	1.33368	-0.80056	-1.59392	-0.105974	-0.53543		-0.383827						-1.30451	2.77416	-1.578	-3.18978	-0.213796	-1.0974			-1.30451	2.77416	-1.578	-3.18978	-0.213796	-1.0974		0.564371		-1.46421	1.22483	0.427848
Q5W6G0	4.94003	5.72511	10.7499	7.92481	10.4863	9.9993	3	3	6			-4.29079	-2.92619	1.55729	-1.44304	1.29933	0.745093		-0.84305						-9.31707	-6.0867	3.06961	-2.88783	2.62131	1.52711			-9.31707	-6.0867	3.06961	-2.88783	2.62131	1.52711		0.341696		4.53158	1.60676	0.328335
Q5W6L9	10.2926	10.5359	10.8978	11.8812	11.066	8.5601	3	3	6			1.06174	1.88455	1.70519	2.51334	1.87895	-0.694099		1.39161						2.30547	3.92001	3.36114	5.02975	3.79066	-1.4226			2.30547	3.92001	3.36114	5.02975	3.79066	-1.4226		0.108457		-0.729604	0.4387	0.737799
Q5W6M3	8.58928	6.43873	6.93404	8.48321	8.00191	9.45621	3	3	6			-0.641536	-2.21258	-2.25853	-0.884637	-1.18509	0.202008		-1.16339						-1.39304	-4.60234	-4.45184	-1.77035	-2.39084	0.414028			-1.39304	-4.60234	-4.45184	-1.77035	-2.39084	0.414028		0.796507		2.23335	2.5322	0.172875
Q5W6R4	9.68634	10.1477	10.3679	9.04614	10.1144	11.2082	3	3	6			0.45553	1.49641	1.17527	-0.321706	0.927388	1.95403		0.947821						0.989144	3.11264	2.31661	-0.643804	1.87095	4.00491			0.989144	3.11264	2.31661	-0.643804	1.87095	4.00491		0.35057		-0.395448	0.317521	0.802447
Q5W726	8.75609	7.58504	8.47265	12.3462	10.5341	9.57543	3	3	6			-0.474723	-1.06627	-0.719927	2.97831	1.3471	0.321223		0.397619						-1.03082	-2.21792	-1.41906	5.96024	2.71769	0.658367			-1.03082	-2.21792	-1.41906	5.96024	2.71769	0.658367		0.0975576		4.66804	4.5749	0.0419584
Q5W727	10.1789	9.69789	9.85537	9.85492	10.8578	9.72601	3	3	6			0.948101	1.04658	0.66279	0.487067	1.67082	0.471811		0.881195						2.05872	2.17697	1.30644	0.974728	3.37077	0.967006			2.05872	2.17697	1.30644	0.974728	3.37077	0.967006		0.208095		-0.0765395	0.101299	0.932193
Q5W736	10.2642	5.23993	8.52525	8.1004	9.00602	10.4216	3	3	6			1.0334	-3.41137	-0.66733	-1.26745	-0.180988	1.16744		-0.554384						2.24393	-7.09592	-1.31539	-2.53644	-0.365131	2.39274			2.24393	-7.09592	-1.31539	-2.53644	-0.365131	2.39274		0.430961		1.88618	0.804675	0.572491
Q5W770	10.1678	11.0297	10.1762	9.93723	7.52748	8.67324	3	3	6			0.936982	2.37839	0.983596	0.569379	-1.65953	-0.580964		0.437976						2.03457	4.94724	1.93879	1.13945	-3.34799	-1.19072			2.03457	4.94724	1.93879	1.13945	-3.34799	-1.19072		0.734591		-4.10662	3.93702	0.0652886
Q5W7C6	11.7516	11.2992	11.504	11.4356	11.8473	10.9097	3	3	6			2.52082	2.6479	2.3114	2.06777	2.66025	1.65554		2.31061						5.47373	5.50784	4.55604	4.13806	5.36688	3.39313			5.47373	5.50784	4.55604	4.13806	5.36688	3.39313		0.453762		-0.879845	1.99996	0.250006
Q5WA72	11.1438	8.88408	9.00211	8.71833	5.8521	12.6961	3	3	6			1.91302	0.232772	-0.190465	-0.64952	-3.33491	3.44187		0.235462						4.15395	0.484183	-0.37543	-1.29983	-6.72796	7.05433			4.15395	0.484183	-0.37543	-1.29983	-6.72796	7.05433		0.214376		-1.74539	0.510781	0.701842
Q5WA76	13.1679	10.5805	12.543	12.4491	10.65	12.1638	3	3	6			3.93712	1.92923	3.35041	3.08122	1.46297	2.90964		2.77843						8.54912	4.01295	6.60406	6.1662	2.95145	5.96347			8.54912	4.01295	6.60406	6.1662	2.95145	5.96347		0.769886		-1.36167	1.11418	0.461955
Q5WMW5	9.87492	5.12172	8.61279	6.30495	10.6577	6.4698	3	3	6			0.644107	-3.52959	-0.579782	-3.0629	1.47067	-2.7844		-1.30698						1.39862	-7.34181	-1.14282	-6.12953	2.96698	-5.70679			1.39862	-7.34181	-1.14282	-6.12953	2.96698	-5.70679		0.868029		-0.594443	0.172374	0.887381
Q5XF85	9.59503	11.4898	11.1869	9.91385	11.2375	10.6587	3	3	6			0.364221	2.83849	1.99428	0.545999	2.0505	1.40446		1.53299						0.790874	5.90428	3.93097	1.09266	4.13676	2.87852			0.790874	5.90428	3.93097	1.09266	4.13676	2.87852		0.52054		-0.839393	0.614603	0.65311
Q5Z4U5	9.31431	6.62409	9.71893	7.6517	6.34072	9.02303	3	3	6			0.0834987	-2.02722	0.526349	-1.71615	-2.84628	-0.231169		-1.03516						0.18131	-4.21677	1.0375	-3.43439	-5.74219	-0.473794			0.18131	-4.21677	1.0375	-3.43439	-5.74219	-0.473794		0.93481		-2.21747	1.4098	0.376364
Q5Z5A8	9.10452	8.83191	10.4144	8.96188	6.34712	9.28082	3	3	6			-0.126292	0.180602	1.22179	-0.405964	-2.83989	0.0266148		-0.323856						-0.274233	0.375665	2.4083	-0.812423	-5.72929	0.0545486			-0.274233	0.375665	2.4083	-0.812423	-5.72929	0.0545486		0.33509		-2.99897	2.29831	0.203301
Q5Z5B2	9.09416	11.1418	9.333	12.1051	10.4356	8.2476	3	3	6			-0.136656	2.49048	0.140422	2.73721	1.24856	-1.00661		0.912235						-0.296736	5.18039	0.276788	5.47776	2.51889	-2.0631			-0.296736	5.18039	0.276788	5.47776	2.51889	-2.0631		0.77132		0.257702	0.103051	0.931062
Q5Z5B7	7.29177	10.0161	7.9571	7.90105	8.33329	6.33908	3	3	6			-1.93904	1.3648	-1.23548	-1.4668	-0.853715	-2.91512		-1.17422						-4.21046	2.8389	-2.43527	-2.93539	-1.72232	-5.97471			-4.21046	2.8389	-2.43527	-2.93539	-1.72232	-5.97471		0.526102		-2.27519	1.29193	0.408403
Q5Z5C9	8.12995	7.4065	8.95434	8.81772	11.8593	12.087	3	3	6			-1.10086	-1.2448	-0.238235	-0.550129	2.67234	2.83276		0.395178						-2.39042	-2.58929	-0.469591	-1.10093	5.39127	5.80592			-2.39042	-2.58929	-0.469591	-1.10093	5.39127	5.80592		0.167379		5.18185	3.46094	0.0908143
Q5Z5F2	8.82731	9.32474	7.40625	8.12112	5.36265	4.53431	3	3	6			-0.403502	0.673436	-1.78633	-1.24673	-3.82436	-4.71989		-1.88456						-0.876168	1.4008	-3.52107	-2.49498	-7.7154	-9.6737			-0.876168	1.4008	-3.52107	-2.49498	-7.7154	-9.6737		0.61171		-5.62921	3.41445	0.0937883
Q5Z5Q3	11.4003	10.001	9.84594	10.9019	9.67775	11.028	3	3	6			2.16948	1.34968	0.653368	1.53407	0.49075	1.77377		1.32852						4.71083	2.80743	1.28787	3.07002	0.990056	3.63545			4.71083	2.80743	1.28787	3.07002	0.990056	3.63545		0.795013		-0.370202	0.347238	0.786088
Q5Z5R4	10.6188	5.75772	9.69718	8.10397	9.0324	9.59973	3	3	6			1.38794	-2.89359	0.504599	-1.26388	-0.154601	0.345525		-0.345668						3.01379	-6.01889	0.994625	-2.5293	-0.311898	0.708173			3.01379	-6.01889	0.994625	-2.5293	-0.311898	0.708173		0.217307		-0.0408495	0.0153262	0.989433
Q5Z5R7	8.46475	8.78028	9.76737	10.5767	12.1874	9.59831	3	3	6			-0.766063	0.12897	0.574796	1.20883	3.00041	0.344111		0.748508						-1.66344	0.268268	1.13299	2.41912	6.05313	0.705276			-1.66344	0.268268	1.13299	2.41912	6.05313	0.705276		0.431234		3.14657	2.71909	0.15187
Q5Z5S6	10.9685	8.16415	7.75161	7.42467	8.4121	9.98968	3	3	6			1.73764	-0.487154	-1.44097	-1.94318	-0.774901	0.735476		-0.362181						3.77313	-1.01332	-2.84032	-3.88872	-1.56331	1.5074			3.77313	-1.01332	-2.84032	-3.88872	-1.56331	1.5074		0.771542		-1.28804	0.653683	0.635656
Q5Z620	5.33635	10.4372	8.05897	8.393	9.59296	8.51763	3	3	6			-3.89446	1.78592	-1.13361	-0.974844	0.405957	-0.736572		-0.757934						-8.45647	3.71486	-2.23449	-1.95088	0.818991	-1.50965			-8.45647	3.71486	-2.23449	-1.95088	0.818991	-1.50965		0.112843		1.44485	0.494126	0.709992
Q5Z627	7.86084	8.45306	9.23312	9.50512	9.62511	9.84987	3	3	6			-1.36997	-0.198242	0.0405391	0.137269	0.438101	0.595672		-0.0594392						-2.97478	-0.412359	0.0799075	0.274705	0.883841	1.22087			-2.97478	-0.412359	0.0799075	0.274705	0.883841	1.22087		0.157524		1.89555	2.97631	0.12707
Q5Z653	6.54527	8.25451	9.2007	9.43964	8.03441	7.92742	3	3	6			-2.68554	-0.396798	0.00812527	0.071796	-1.15259	-1.32678		-0.913631						-5.83141	-0.82537	0.0160159	0.14368	-2.32528	-2.71931			-5.83141	-0.82537	0.0160159	0.14368	-2.32528	-2.71931		0.388336		0.579951	0.340774	0.789618
Q5Z6B1	7.824	8.65037	9.49303	9.09524	7.49313	10.8504	3	3	6			-1.40681	-0.000937447	0.300458	-0.272609	-1.69387	1.59622		-0.246258						-3.05476	-0.00194996	0.592238	-0.545551	-3.41727	3.27155			-3.05476	-0.00194996	0.592238	-0.545551	-3.41727	3.27155		0.507526		0.591065	0.312685	0.805142
Q5Z6B6	10.2546	8.6653	6.85412	10.5524	10.7573	10.5238	3	3	6			1.02374	0.0139933	-2.33846	1.18453	1.5703	1.26956		0.453945						2.22297	0.0291071	-4.60938	2.37051	3.16798	2.60203			2.22297	0.0291071	-4.60938	2.37051	3.16798	2.60203		0.0272865		3.49928	2.16367	0.223187
Q5Z6E5	11.4912	7.78575	11.2212	10.958	11.0213	9.80329	3	3	6			2.26034	-0.86556	2.02859	1.59012	1.83425	0.549089		1.23281						4.90813	-1.80043	3.99859	3.18219	3.70049	1.12539			4.90813	-1.80043	3.99859	3.18219	3.70049	1.12539		0.245724		0.300593	0.152193	0.899881
Q5Z6F0	8.05761	10.5503	10.6511	10.8471	11.0772	10.762	3	3	6			-1.1732	1.89896	1.45856	1.47929	1.89021	1.50785		1.17694						-2.5475	3.94998	2.87501	2.96038	3.81338	3.09042			-2.5475	3.94998	2.87501	2.96038	3.81338	3.09042		0.0342282		1.86223	1.14356	0.45264
Q5Z6F6	10.4253	10.5983	11.5729	8.73752	9.94202	10.7243	3	3	6			1.19451	1.94702	2.38031	-0.63033	0.755011	1.47014		1.18611						2.59377	4.04996	4.69188	-1.26143	1.52319	3.01314			2.59377	4.04996	4.69188	-1.26143	1.52319	3.01314		0.394231		-2.6869	2.97722	0.12699
Q5Z6G5	9.53089	10.5891	10.5983	10.5214	10.3767	11.5928	3	3	6			0.300081	1.93778	1.40575	1.15356	1.18966	2.33858		1.38757						0.6516	4.03073	2.77091	2.30852	2.40007	4.79306			0.6516	4.03073	2.77091	2.30852	2.40007	4.79306		0.809916		0.682801	0.686176	0.621499
Q5Z6K9	8.62227	9.96016	10.2617	7.65292	8.29522	9.10559	3	3	6			-0.608541	1.30885	1.06917	-1.71493	-0.891787	-0.148608		-0.164308						-1.32139	2.72252	2.10745	-3.43195	-1.79912	-0.304581			-1.32139	2.72252	2.10745	-3.43195	-1.79912	-0.304581		0.680133		-3.01474	3.01833	0.123422
Q5Z6X0	8.42974	8.06792	9.55963	10.9758	10.8568	10.0649	3	3	6			-0.801071	-0.583389	0.367048	1.60793	1.66981	0.810675		0.511834						-1.73946	-1.21349	0.723497	3.21782	3.36873	1.66153			-1.73946	-1.21349	0.723497	3.21782	3.36873	1.66153		0.693587		3.49251	5.67171	0.0196176
Q5Z749	4.70543	7.23333	7.47184	8.35566	7.85624	6.24382	3	3	6			-4.52539	-1.41798	-1.72074	-1.01219	-1.33077	-3.01038		-2.16957						-9.82648	-2.9495	-3.39179	-2.02561	-2.68474	-6.16996			-9.82648	-2.9495	-3.39179	-2.02561	-2.68474	-6.16996		0.501587		1.76249	0.915564	0.530137
Q5Z754	9.92862	8.20584	9.04078	8.19052	10.6116	8.65575	3	3	6			0.697809	-0.445465	-0.151794	-1.17733	1.42457	-0.598457		-0.0417776						1.51523	-0.926601	-0.299205	-2.3561	2.87398	-1.22657			1.51523	-0.926601	-0.299205	-2.3561	2.87398	-1.22657		0.35026		-0.332704	0.220219	0.858435
Q5Z7L0	10.1297	9.40175	10.2224	8.84693	11.0035	9.42585	3	3	6			0.898857	0.750447	1.02986	-0.520916	1.81651	0.171643		0.691067						1.95179	1.56099	2.02997	-1.04247	3.6647	0.351792			1.95179	1.56099	2.02997	-1.04247	3.6647	0.351792		0.0213667		-0.85624	0.730394	0.602739
Q5Z807	11.0428	10.7846	11.6684	11.4744	11.1957	10.3367	3	3	6			1.81194	2.13333	2.47578	2.10657	2.00874	1.08253		1.93648						3.93447	4.43748	4.88005	4.2157	4.0525	2.2187			3.93447	4.43748	4.88005	4.2157	4.0525	2.2187		0.308016		-0.921701	1.96561	0.256031
Q5Z856	10.7769	9.2213	9.252	12.5088	10.107	11.1717	3	3	6			1.54611	0.56999	0.0594259	3.14091	0.91995	1.91747		1.35898						3.35725	1.18562	0.117136	6.28565	1.85594	3.92998			3.35725	1.18562	0.117136	6.28565	1.85594	3.92998		0.71378		2.47052	2.34763	0.196469
Q5Z859	3.59658	7.79064	5.27758	6.13916	7.14751	6.05977	3	3	6			-5.63424	-0.860665	-3.915	-3.22869	-2.03949	-3.19444		-3.14542						-12.2342	-1.79025	-7.71694	-6.46131	-4.11455	-6.54719			-12.2342	-1.79025	-7.71694	-6.46131	-4.11455	-6.54719		0.129883		1.53946	0.625207	0.648327
Q5Z880	8.79552	8.82053	5.49438	7.28485	9.27843	8.60833	3	3	6			-0.435292	0.169223	-3.69819	-2.083	0.0914212	-0.645874		-1.10029						-0.945199	0.351997	-7.28959	-4.16854	0.184436	-1.32376			-0.945199	0.351997	-7.28959	-4.16854	0.184436	-1.32376		0.452253		0.85831	0.386255	0.765113
Q5Z8N6	13.7481	7.4422	9.38677	8.15335	10.9196	7.23668	3	3	6			4.51728	-1.20911	0.194191	-1.2145	1.7326	-2.01752		0.333824						9.80887	-2.51504	0.382773	-2.43048	3.49542	-4.13502			9.80887	-2.51504	0.382773	-2.43048	3.49542	-4.13502		0.557342		-3.58223	1.12222	0.459388
Q5Z8P0	9.34937	6.82883	9.69244	10.3235	9.43137	10.5669	3	3	6			0.118557	-1.82247	0.499864	0.955657	0.244367	1.31271		0.218114						0.257436	-3.79088	0.985292	1.91248	0.492995	2.69047			0.257436	-3.79088	0.985292	1.91248	0.492995	2.69047		0.315777		2.54803	2.39112	0.190634
Q5Z8P2	9.10053	8.45133	11.3713	10.1812	9.5434	9.69267	3	3	6			-0.130282	-0.199972	2.17876	0.813304	0.356394	0.438465		0.576112						-0.282895	-0.415958	4.29461	1.6276	0.719002	0.898661			-0.282895	-0.415958	4.29461	1.6276	0.719002	0.898661		0.0623652		-0.11683	0.0825802	0.944367
Q5Z8Q9	10.6162	9.5173	9.31791	10.0224	8.50383	11.3474	3	3	6			1.38537	0.865988	0.125333	0.65452	-0.683179	2.0932		0.740205						3.00821	1.80132	0.247046	1.30984	-1.37827	4.29013			3.00821	1.80132	0.247046	1.30984	-1.37827	4.29013		0.38491		-0.278291	0.174652	0.885981
Q5Z8T3	8.85857	9.46856	9.82024	7.57357	10.0885	8.45335	3	3	6			-0.372241	0.817256	0.627666	-1.79428	0.901518	-0.800849		-0.103488						-0.808288	1.69995	1.2372	-3.59074	1.81876	-1.64139			-0.808288	1.69995	1.2372	-3.59074	1.81876	-1.64139		0.383653		-1.84741	1.50234	0.35298
Q5Z8T8	8.73927	8.85119	10.5127	11.3835	10.8049	9.04949	3	3	6			-0.491538	0.19988	1.32016	2.01569	1.61785	-0.204708		0.742891						-1.06733	0.415765	2.6022	4.03385	3.26391	-0.419561			-1.06733	0.415765	2.6022	4.03385	3.26391	-0.419561		0.751134		1.64252	1.32769	0.398405
Q5Z8V7	10.6536	9.33329	11.9585	12.3093	10.4458	12.3849	3	3	6			1.42275	0.681982	2.7659	2.94143	1.25884	3.13074		2.03361						3.08937	1.41858	5.45193	5.88645	2.53962	6.41665			3.08937	1.41858	5.45193	5.88645	2.53962	6.41665		0.963397		1.62761	1.36224	0.388978
Q5Z8Y4	10.6723	9.98371	10.4631	9.60635	9.73738	9.39663	3	3	6			1.44152	1.3324	1.27054	0.238502	0.550378	0.142424		0.829294						3.13014	2.77149	2.50438	0.477294	1.11035	0.291906			3.13014	2.77149	2.50438	0.477294	1.11035	0.291906		0.697364		-2.17549	8.89966	0.0020938
Q5Z8Z7	8.00798	6.46387	10.8254	10.6566	11.4803	7.02691	3	3	6			-1.22283	-2.18744	1.63286	1.28876	2.29333	-2.22729		-0.0704364						-2.65527	-4.55004	3.21856	2.57908	4.62665	-4.56497			-2.65527	-4.55004	3.21856	2.57908	4.62665	-4.56497		0.826702		2.20917	0.794822	0.576414
Q5Z922	12.9522	11.9428	12.1838	11.7413	12.1704	12.4682	3	3	6			3.72135	3.29146	2.99118	2.37341	2.98339	3.21404		3.09581						8.08058	6.8465	5.89598	4.74971	6.0188	6.58737			8.08058	6.8465	5.89598	4.74971	6.0188	6.58737		0.849074		-1.15573	2.07149	0.237913
Q5Z974	8.68926	11.9607	9.00874	10.7807	11.4607	10.5704	3	3	6			-0.541548	3.30942	-0.18384	1.41286	2.27371	1.31622		1.26447						-1.17592	6.88384	-0.362372	2.82743	4.58706	2.69768			-1.17592	6.88384	-0.362372	2.82743	4.58706	2.69768		0.107087		1.58887	0.788877	0.578795
Q5Z980	11.4759	9.81215	9.91283	10.5312	7.69244	9.40557	3	3	6			2.24512	1.16084	0.720252	1.16334	-1.49456	0.151365		0.657726						4.87509	2.41463	1.4197	2.3281	-3.01519	0.310231			4.87509	2.41463	1.4197	2.3281	-3.01519	0.310231		0.605877		-3.02876	2.47511	0.179853
Q5Z987	13.0761	10.9294	11.8558	12.0712	11.3142	12.1518	3	3	6			3.84527	2.2781	2.66319	2.70338	2.12724	2.89758		2.75246						8.34966	4.73862	5.24946	5.41006	4.29157	5.93875			8.34966	4.73862	5.24946	5.41006	4.29157	5.93875		0.312552		-0.899123	0.986406	0.504734
Q5Z9I2	11.6496	12.8679	7.90839	11.6279	7.01179	12.8545	3	3	6			2.4188	4.21657	-1.28418	2.26005	-2.17522	3.60033		1.50606						5.25222	8.77079	-2.53128	4.52286	-4.38836	7.3791			5.25222	8.77079	-2.53128	4.52286	-4.38836	7.3791		0.940617		-1.32604	0.32402	0.798841
Q5Z9J0	10.0051	7.78529	8.34319	8.69293	9.10276	5.55603	3	3	6			0.77425	-0.866018	-0.849391	-0.674919	-0.0842419	-3.69817		-0.899749						1.68122	-1.80138	-1.67425	-1.35066	-0.169953	-7.57962			1.68122	-1.80138	-1.67425	-1.35066	-0.169953	-7.57962		0.394998		-2.43527	1.33532	0.396303
Q5Z9N5	9.23623	9.9471	5.91258	9.66904	8.60481	5.51835	3	3	6			0.00541692	1.29579	-3.28	0.301197	-0.582192	-3.73586		-0.999274						0.0117624	2.69534	-6.46528	0.60276	-1.17454	-7.65686			0.0117624	2.69534	-6.46528	0.60276	-1.17454	-7.65686		0.920194		-1.49015	0.498666	0.707761
Q5Z9S8	10.6624	10.3516	8.9284	10.2557	10.3989	10.5292	3	3	6			1.43159	1.70029	-0.264177	0.887889	1.21185	1.27503		1.04041						3.10857	3.53674	-0.520725	1.77686	2.44482	2.61326			3.10857	3.53674	-0.520725	1.77686	2.44482	2.61326		0.0757673		0.236784	0.208275	0.865571
Q5Z9Z0	7.69968	10.2606	11.4574	10.2535	9.22535	8.10234	3	3	6			-1.53114	1.60926	2.26485	0.885645	0.0383471	-1.15186		0.352519						-3.32473	3.34738	4.4643	1.77237	0.0773627	-2.3608			-3.32473	3.34738	4.4643	1.77237	0.0773627	-2.3608		0.391445		-1.66601	0.805521	0.572155
Q5ZA07	10.3018	8.72537	10.5034	11.0672	11.4217	8.14665	3	3	6			1.07103	0.0740592	1.31085	1.69938	2.23474	-1.10756		0.880418						2.32564	0.154049	2.58385	3.40084	4.50845	-2.27001			2.32564	0.154049	2.58385	3.40084	4.50845	-2.27001		0.237425		0.191918	0.0958295	0.935734
Q5ZA21	10.406	6.6274	9.38907	11.0641	9.23453	10.7019	3	3	6			1.17518	-2.0239	0.196495	1.69622	0.0475251	1.44771		0.423204						2.5518	-4.20988	0.387315	3.39451	0.0958787	2.96717			2.5518	-4.20988	0.387315	3.39451	0.0958787	2.96717		0.425063		2.57611	1.66456	0.315441
Q5ZAY0	10.6384	8.64814	11.1823	9.38295	10.8784	11.1315	3	3	6			1.40762	-0.00316527	1.98969	0.0151003	1.69135	1.87727		1.16298						3.05653	-0.006584	3.92193	0.0302191	3.41219	3.84757			3.05653	-0.006584	3.92193	0.0302191	3.41219	3.84757		0.987738		0.106039	0.0692387	0.953141
Q5ZAY9	7.93103	5.75862	10.6732	10.3971	13.5111	10.8939	3	3	6			-1.29978	-2.89268	1.48064	1.02929	4.32413	1.63971		0.713551						-2.82236	-6.017	2.91853	2.05984	8.72365	3.36068			-2.82236	-6.017	2.91853	2.05984	8.72365	3.36068		0.75667		6.68833	3.1348	0.11385
Q5ZBH5	13.0783	6.6659	10.3472	8.25077	8.71963	10.4315	3	3	6			3.84745	-1.9854	1.1546	-1.11708	-0.467377	1.1773		0.434916						8.35441	-4.12979	2.27586	-2.23551	-0.942902	2.41294			8.35441	-4.12979	2.27586	-2.23551	-0.942902	2.41294		0.257404		-2.42199	0.824891	0.564525
Q5ZC83	10.0589	8.35204	9.72339	7.76547	9.33349	10.0243	3	3	6			0.828126	-0.299264	0.530811	-1.60238	0.146486	0.770106		0.0623143						1.7982	-0.622491	1.04629	-3.20671	0.295526	1.57838			1.7982	-0.622491	1.04629	-3.20671	0.295526	1.57838		0.400273		-1.18494	1.0006	0.499791
Q5ZC87	9.5618	6.21412	9.1191	8.69289	5.9822	8.14731	3	3	6			0.330991	-2.43718	-0.0734805	-0.674953	-3.20481	-1.1069		-1.19439						0.718717	-5.06952	-0.144839	-1.35073	-6.4655	-2.26865			0.718717	-5.06952	-0.144839	-1.35073	-6.4655	-2.26865		0.865349		-1.86308	1.05945	0.479814
Q5ZC88	11.3782	9.24144	10.0003	11.9424	14.671	12.1496	3	3	6			2.14737	0.590128	0.807705	2.57459	5.48398	2.89535		2.41652						4.66283	1.22751	1.59208	5.15233	11.0636	5.9342			4.66283	1.22751	1.59208	5.15233	11.0636	5.9342		0.513377		4.88923	3.55005	0.0853747
Q5ZCC5	7.68895	9.14172	10.5333	9.76863	10.2968	10.0704	3	3	6			-1.54186	0.490417	1.34075	0.400783	1.1098	0.816187		0.436012						-3.34802	1.0201	2.64279	0.802055	2.23894	1.67282			-3.34802	1.0201	2.64279	0.802055	2.23894	1.67282		0.103491		1.46632	1.0909	0.469468
Q5ZCI1	10.2664	8.58195	6.27901	10.802	9.42396	6.10501	3	3	6			1.03562	-0.0693534	-2.91357	1.4341	0.236951	-3.14919		-0.570907						2.24876	-0.14426	-5.743	2.86995	0.478034	-6.45446			2.24876	-0.14426	-5.743	2.86995	0.478034	-6.45446		0.835373		0.177341	0.0533163	0.963718
Q5ZDJ6	8.95562	8.49249	9.63865	13.6556	9.84227	8.63695	3	3	6			-0.275192	-0.158813	0.446076	4.28779	0.655267	-0.617252		0.72298						-0.597555	-0.330343	0.87927	8.58082	1.32196	-1.26509			-0.597555	-0.330343	0.87927	8.58082	1.32196	-1.26509		0.0464327		2.89544	1.21774	0.429956
Q5ZE07	10.8807	9.58024	10.2898	8.09956	11.1099	8.7963	3	3	6			1.64984	0.928933	1.09721	-1.26829	1.92289	-0.457903		0.645447						3.58249	1.93225	2.16274	-2.53813	3.87931	-0.9385			3.58249	1.93225	2.16274	-2.53813	3.87931	-0.9385		0.133586		-2.42493	1.77937	0.291311
Q60DW3	10.6074	10.4475	8.27966	11.6863	8.80003	11.7778	3	3	6			1.37661	1.79619	-0.91292	2.31843	-0.386979	2.52359		1.11915						2.98919	3.73621	-1.79948	4.63969	-0.780705	5.17224			2.98919	3.73621	-1.79948	4.63969	-0.780705	5.17224		0.908007		1.36844	0.682471	0.623097
Q60DX8	9.49348	9.73887	7.86765	8.97301	9.418	10.5226	3	3	6			0.262663	1.08756	-1.32493	-0.394839	0.230995	1.26838		0.188305						0.570349	2.26221	-2.61159	-0.79016	0.466018	2.59962			0.570349	2.26221	-2.61159	-0.79016	0.466018	2.59962		0.648278		0.684836	0.486744	0.713634
Q60DY1	7.8173	8.67402	9.5513	9.58163	8.84815	10.1977	3	3	6			-1.41351	0.0227086	0.358727	0.213786	-0.338852	0.943506		-0.0356055						-3.06931	0.0472355	0.707095	0.427832	-0.683611	1.93377			-3.06931	0.0472355	0.707095	0.427832	-0.683611	1.93377		0.595676		1.33099	1.3495	0.392427
Q60E60	5.73365	7.25238	8.73071	9.0839	10.5147	8.86962	3	3	6			-3.49716	-1.39893	-0.461869	-0.283943	1.32771	-0.384578		-0.783128						-7.59377	-2.90987	-0.9104	-0.568232	2.67857	-0.788215			-7.59377	-2.90987	-0.9104	-0.568232	2.67857	-0.788215		0.485097		4.24539	2.88341	0.135521
Q60E61	8.61102	4.88928	8.63445	6.18243	9.85381	4.21653	3	3	6			-0.619788	-3.76203	-0.558129	-3.18541	0.666804	-5.03767		-2.0827						-1.34581	-7.8253	-1.10014	-6.37471	1.34523	-10.325			-1.34581	-7.8253	-1.10014	-6.37471	1.34523	-10.325		0.584406		-1.69441	0.517085	0.698782
Q60EH4	9.11275	10.4825	7.49649	9.72717	8.3981	10.8794	3	3	6			-0.11806	1.8312	-1.69608	0.359324	-0.788903	1.62515		0.202105						-0.256358	3.80903	-3.34318	0.719086	-1.59156	3.33084			-0.256358	3.80903	-3.34318	0.719086	-1.59156	3.33084		0.640674		0.749627	0.357972	0.780261
Q60EJ6	10.7253	9.97355	9.513	10.5977	9.80946	10.3862	3	3	6			1.49447	1.32225	0.32042	1.22983	0.622458	1.13198		1.02023						3.24511	2.75037	0.631587	2.46116	1.25577	2.32007			3.24511	2.75037	0.631587	2.46116	1.25577	2.32007		0.367762		-0.196689	0.259427	0.835419
Q60EW9	10.9713	9.41378	10.9991	10.2884	12.3312	10.4415	3	3	6			1.74044	0.762469	1.80651	0.920557	3.14422	1.18729		1.59358						3.77922	1.58599	3.56084	1.84224	6.34326	2.43342			3.77922	1.58599	3.56084	1.84224	6.34326	2.43342		0.392263		0.564287	0.437819	0.73825
Q60EX6	9.0793	8.88038	9.03963	11.357	9.28981	8.97031	3	3	6			-0.151514	0.229072	-0.152945	1.98915	0.102806	-0.283895		0.28878						-0.329	0.476488	-0.301474	3.98073	0.207405	-0.58186			-0.329	0.476488	-0.301474	3.98073	0.207405	-0.58186		0.0679497		1.25342	1.2144	0.430951
Q60EX7	12.3226	10.6079	9.99039	10.4344	9.97284	9.99053	3	3	6			3.09182	1.95658	0.79781	1.06657	0.785831	0.736327		1.40582						6.71361	4.06983	1.57258	2.13444	1.58536	1.50915			6.71361	4.06983	1.57258	2.13444	1.58536	1.50915		0.0346082		-2.37569	2.00385	0.249334
Q60EY1	8.39202	8.44853	11.3193	10.5938	10.0108	7.07468	3	3	6			-0.838796	-0.202778	2.1267	1.22592	0.823803	-2.17953		0.15922						-1.82137	-0.421793	4.19198	2.45333	1.66197	-4.46707			-1.82137	-0.421793	4.19198	2.45333	1.66197	-4.46707		0.816639		-0.766863	0.320653	0.800707
Q60EZ2	8.78777	7.93145	10.8258	4.8505	9.55911	10.7996	3	3	6			-0.443041	-0.71986	1.63318	-4.51735	0.372104	1.5454		-0.354928						-0.962024	-1.49736	3.21919	-9.0402	0.750697	3.1674			-0.962024	-1.49736	3.21919	-9.0402	0.750697	3.1674		0.275261		-1.96064	0.618841	0.651194
Q60GC1	11.2526	10.1896	14.4171	14.7622	7.09635	14.4643	3	3	6			2.02179	1.53827	5.22448	5.39438	-2.09066	5.21009		2.88306						4.39015	3.19972	10.2981	10.7953	-4.21777	10.6784			4.39015	3.19972	10.2981	10.7953	-4.21777	10.6784		0.324742		-0.210668	0.0424557	0.971001
Q64M78	10.7231	10.7581	10.3796	11.2206	16.709	7.54851	3	3	6			1.49234	2.10675	1.18702	1.85271	7.522	-1.70569		2.07585						3.24048	4.3822	2.33976	3.70768	15.1751	-3.49591			3.24048	4.3822	2.33976	3.70768	15.1751	-3.49591		0.023357		1.80816	0.373901	0.771693
Q64MA3	9.69192	10.5178	9.42305	11.2591	8.08401	10.6013	3	3	6			0.461105	1.86646	0.230476	1.89125	-1.10299	1.3471		0.782233						1.00125	3.88238	0.454295	3.7848	-2.22522	2.76097			1.00125	3.88238	0.454295	3.7848	-2.22522	2.76097		0.494081		-0.339124	0.181591	0.88173
Q650T9	10.4397	7.7341	9.13499	8.55371	10.2595	9.22171	3	3	6			1.20891	-0.917207	-0.0575862	-0.814142	1.0725	-0.0324944		0.0766646						2.62505	-1.90786	-0.113509	-1.62928	2.16371	-0.0665993			2.62505	-1.90786	-0.113509	-1.62928	2.16371	-0.0665993		0.821673		-0.0452836	0.0288176	0.980223
Q651A1	10.8008	10.9625	9.69038	10.0253	10.2662	7.40131	3	3	6			1.57001	2.31116	0.497805	0.65743	1.0792	-1.8529		0.710449						3.40913	4.80738	0.981234	1.31566	2.17721	-3.79762			3.40913	4.80738	0.981234	1.31566	2.17721	-3.79762		0.528686		-3.1675	2.19197	0.218853
Q651B6	10.1859	8.31818	10.7453	7.8899	11.5229	7.83599	3	3	6			0.955054	-0.333126	1.55276	-1.47795	2.33587	-1.41822		0.269066						2.07382	-0.692927	3.06068	-2.9577	4.71247	-2.90672			2.07382	-0.692927	3.06068	-2.9577	4.71247	-2.90672		0.325467		-1.86451	0.889399	0.539839
Q651J5	10.5601	9.88361	10.8976	11.3296	10.9043	11.3829	3	3	6			1.32933	1.2323	1.70504	1.96178	1.71733	2.12869		1.67908						2.88652	2.56327	3.36084	3.92595	3.4646	4.36288			2.88652	2.56327	3.36084	3.92595	3.4646	4.36288		0.887385		0.980932	4.38763	0.047774
Q651U1	9.23197	10.2602	10.8754	8.83109	7.82177	10.7124	3	3	6			0.00115256	1.60891	1.68279	-0.536762	-1.36523	1.45815		0.474834						0.00250268	3.34665	3.31698	-1.07418	-2.75427	2.98857			0.00250268	3.34665	3.31698	-1.07418	-2.75427	2.98857		0.595336		-2.502	1.80546	0.286089
Q651V6	9.53867	11.2769	6.50251	6.97865	10.6903	9.81593	3	3	6			0.307861	2.62563	-2.69007	-2.38919	1.50325	0.561725		-0.0134655						0.668494	5.46151	-5.30246	-4.7813	3.03272	1.15129			0.668494	5.46151	-5.30246	-4.7813	3.03272	1.15129		0.727675		-0.474948	0.137603	0.909028
Q651X6	10.4416	9.89163	8.89694	11.069	8.41075	10.3404	3	3	6			1.21078	1.24032	-0.295639	1.7012	-0.776257	1.0862		0.694436						2.62911	2.57997	-0.582741	3.40447	-1.56605	2.22624			2.62911	2.57997	-0.582741	3.40447	-1.56605	2.22624		0.668492		-0.187224	0.11441	0.92376
Q651X7	8.97699	9.68421	9.95465	7.72165	7.76308	8.52501	3	3	6			-0.253819	1.0329	0.76207	-1.6462	-1.42393	-0.729191		-0.376361						-0.551145	2.14851	1.50213	-3.29441	-2.87268	-1.49452			-0.551145	2.14851	1.50213	-3.29441	-2.87268	-1.49452		0.616845		-3.58703	5.54099	0.0214781
Q651Z7	10.4969	10.0889	11.1704	9.19042	12.9331	10.5098	3	3	6			1.26604	1.43761	1.97785	-0.177431	3.74613	1.25557		1.5843						2.7491	2.99035	3.89858	-0.355077	7.55758	2.57337			2.7491	2.99035	3.89858	-0.355077	7.55758	2.57337		0.0448811		0.0459512	0.0203072	0.986023
Q652F9	9.3009	9.73713	9.74324	10.8609	10.3252	10.9881	3	3	6			0.070089	1.08582	0.550658	1.49308	1.13819	1.73391		1.01196						0.152192	2.25859	1.08541	2.98799	2.29622	3.55376			0.152192	2.25859	1.08541	2.98799	2.29622	3.55376		0.525152		1.78059	3.9189	0.0661138
Q652I1	10.4376	9.28783	8.72829	8.84175	8.84103	6.26292	3	3	6			1.20684	0.636521	-0.464283	-0.526095	-0.345975	-2.99128		-0.414046						2.62054	1.32401	-0.915157	-1.05283	-0.697983	-6.13081			2.62054	1.32401	-0.915157	-1.05283	-0.697983	-6.13081		0.514477		-3.637	2.75051	0.148598
Q652J4	7.55834	8.24351	7.72778	9.75772	9.06692	9.1408	3	3	6			-1.67247	-0.4078	-1.46479	0.389875	-0.120082	-0.113398		-0.564778						-3.63162	-0.848255	-2.88728	0.780226	-0.242257	-0.232416			-3.63162	-0.848255	-2.88728	0.780226	-0.242257	-0.232416		0.285071		2.55757	4.42497	0.0465533
Q652K4	10.0076	9.81692	9.49833	10.128	11.7735	10.3033	3	3	6			0.776775	1.16561	0.305753	0.760146	2.58651	1.04912		1.10732						1.6867	2.42456	0.602677	1.52122	5.21811	2.15024			1.6867	2.42456	0.602677	1.52122	5.21811	2.15024		0.353436		1.39188	1.59593	0.330808
Q652K6	7.91612	10.7954	10.5284	10.6391	9.51938	12.2168	3	3	6			-1.31469	2.14408	1.33578	1.27122	0.332376	2.96257		1.12189						-2.85474	4.45986	2.63298	2.54399	0.670547	6.07197			-2.85474	4.45986	2.63298	2.54399	0.670547	6.07197		0.683361		1.68281	0.815756	0.568111
Q652L2	10.1644	9.9339	10.7969	11.55	10.8143	11.3583	3	3	6			0.933592	1.28259	1.60427	2.18213	1.62726	2.10406		1.62232						2.02721	2.66788	3.16222	4.36692	3.28289	4.31241			2.02721	2.66788	3.16222	4.36692	3.28289	4.31241		0.929457		1.3683	4.41388	0.0469126
Q652L6	8.46773	8.37513	9.55599	11.0725	8.1265	10.4294	3	3	6			-0.763085	-0.276181	0.363411	1.70462	-1.06051	1.1752		0.190577						-1.65697	-0.574477	0.716328	3.41132	-2.1395	2.40865			-1.65697	-0.574477	0.716328	3.41132	-2.1395	2.40865		0.277844		1.73186	1.32195	0.399993
Q652N5	6.46122	7.815	11.0126	9.51971	7.78588	9.21089	3	3	6			-2.7696	-0.836308	1.81998	0.151867	-1.40113	-0.0433119		-0.513083						-6.01393	-1.73958	3.5874	0.303919	-2.82668	-0.0887704			-6.01393	-1.73958	3.5874	0.303919	-2.82668	-0.0887704		0.223326		0.518195	0.202661	0.868946
Q652Z7	9.29772	10.5577	9.10507	9.77933	11.2786	9.50855	3	3	6			0.0669062	1.90635	-0.0875068	0.411478	2.09162	0.254345		0.773865						0.145281	3.96535	-0.172487	0.823457	4.21971	0.521296			0.145281	3.96535	-0.172487	0.823457	4.21971	0.521296		0.886002		0.542105	0.365758	0.776061
Q653B6	8.62011	7.21422	6.50136	8.16098	7.73457	6.32704	3	3	6			-0.610703	-1.43709	-2.69122	-1.20687	-1.45243	-2.92716		-1.72091						-1.32609	-2.98925	-5.30472	-2.41521	-2.93019	-5.99939			-1.32609	-2.98925	-5.30472	-2.41521	-2.93019	-5.99939		0.96934		-0.574912	0.437099	0.738618
Q653F4	11.8255	9.80172	11.3477	8.07291	7.77162	8.71911	3	3	6			2.59466	1.15042	2.1551	-1.29494	-1.41538	-0.535087		0.442462						5.63408	2.39296	4.24796	-2.59146	-2.85545	-1.09669			5.63408	2.39296	4.24796	-2.59146	-2.85545	-1.09669		0.507627		-6.27286	7.80398	0.00447475
Q653H7	8.70145	11.1138	9.32778	11.0408	10.1419	10.9344	3	3	6			-0.529367	2.4625	0.1352	1.67299	0.954847	1.68015		1.06272						-1.14947	5.12219	0.266495	3.34802	1.92634	3.44357			-1.14947	5.12219	0.266495	3.34802	1.92634	3.44357		0.125122		1.49291	1.03217	0.488975
Q653N3	11.5072	8.95687	10.1244	10.3887	11.1371	9.78678	3	3	6			2.27644	0.305563	0.931803	1.02082	1.95005	0.532574		1.16954						4.94308	0.635594	1.8367	2.04288	3.9341	1.09154			4.94308	0.635594	1.8367	2.04288	3.9341	1.09154		0.595229		-0.115618	0.0839969	0.94344
Q653P0	10.8671	10.7114	11.8415	10.9066	10.6707	12.0407	3	3	6			1.63631	2.0601	2.64891	1.53874	1.48374	2.78653		2.02572						3.55311	4.28517	5.22132	3.07936	2.99335	5.71117			3.55311	4.28517	5.22132	3.07936	2.99335	5.71117		0.453157		-0.42524	0.5217	0.696551
Q653S3	8.10066	7.53442	9.92812	9.94326	9.98185	11.2112	3	3	6			-1.13015	-1.11689	0.735541	0.575414	0.794848	1.95702		0.30263						-2.45402	-2.32321	1.44984	1.15153	1.60355	4.01102			-2.45402	-2.32321	1.44984	1.15153	1.60355	4.01102		0.649274		3.3645	3.36761	0.0968833
Q653S9	10.5109	8.25063	10.1643	9.9678	11.7026	9.21454	3	3	6			1.28005	-0.400677	0.971701	0.599955	2.51556	-0.0396647		0.821154						2.77952	-0.833439	1.91534	1.20064	5.07498	-0.0812951			2.77952	-0.833439	1.91534	1.20064	5.07498	-0.0812951		0.661208		0.777634	0.509469	0.702481
Q653T6	8.7105	7.74255	7.76109	6.44002	7.44989	11.0199	3	3	6			-0.520316	-0.908762	-1.43149	-2.92783	-1.73711	1.76567		-0.959974						-1.12982	-1.89029	-2.82164	-5.85922	-3.50451	3.61884			-1.12982	-1.89029	-2.82164	-5.85922	-3.50451	3.61884		0.0572763		0.0322866	0.0121351	0.991624
Q653V7	12.1837	8.93003	9.64917	8.65707	10.4997	9.08279	3	3	6			2.95292	0.278721	0.456589	-0.71078	1.31274	-0.171415		0.686462						6.412	0.57976	0.899992	-1.42243	2.64837	-0.351325			6.412	0.57976	0.899992	-1.42243	2.64837	-0.351325		0.585789		-2.33904	1.48415	0.35746
Q654B3	8.58883	7.75395	6.90785	9.75556	8.42597	7.13402	3	3	6			-0.641986	-0.897355	-2.28473	0.387707	-0.761034	-2.12019		-1.05293						-1.39401	-1.86657	-4.50347	0.775887	-1.53534	-4.34545			-1.39401	-1.86657	-4.50347	0.775887	-1.53534	-4.34545		0.598285		0.886384	0.638016	0.642596
Q654D9	7.40361	5.46653	6.12195	9.69549	6.89712	9.05943	3	3	6			-1.8272	-3.18478	-3.07063	0.327641	-2.28989	-0.194777		-1.70661						-3.96761	-6.62458	-6.05258	0.655682	-4.6197	-0.399207			-3.96761	-6.62458	-6.05258	0.655682	-4.6197	-0.399207		0.401231		4.09385	3.54582	0.0856255
Q654M1	11.0402	8.47703	7.06167	8.8438	6.84373	8.06749	3	3	6			1.80934	-0.174277	-2.13091	-0.524052	-2.34327	-1.18671		-0.758314						3.92882	-0.36251	-4.20028	-1.04874	-4.7274	-2.43224			3.92882	-0.36251	-4.20028	-1.04874	-4.7274	-2.43224		0.34541		-2.52481	1.38305	0.383409
Q654V6	5.902	9.48724	8.48973	10.5644	7.56323	10.2938	3	3	6			-3.32881	0.83593	-0.70285	1.19659	-1.62377	1.03961		-0.43055						-7.22822	1.7388	-1.3854	2.39463	-3.27585	2.13075			-7.22822	1.7388	-1.3854	2.39463	-3.27585	2.13075		0.661658		2.70812	1.16266	0.446689
Q655R6	10.5702	10.7476	9.71356	9.80407	11.4733	11.5984	3	3	6			1.33942	2.0963	0.520981	0.436219	2.28629	2.34418		1.5039						2.90844	4.36046	1.02692	0.872969	4.61245	4.80453			2.90844	4.36046	1.02692	0.872969	4.61245	4.80453		0.724976		0.664712	0.515363	0.699617
Q655S1	10.9061	9.48063	10.0464	8.73512	7.95082	8.25701	3	3	6			1.67533	0.829322	0.853865	-0.632732	-1.23619	-0.997192		0.0820671						3.63782	1.72505	1.68307	-1.26624	-2.49393	-2.0438			3.63782	1.72505	1.68307	-1.26624	-2.49393	-2.0438		0.472531		-4.2833	7.83564	0.0043776
Q655V5	7.81666	9.77844	6.44783	6.86381	6.30561	9.37652	3	3	6			-1.41415	1.12713	-2.74475	-2.50403	-2.8814	0.122314		-1.38248						-3.0707	2.34452	-5.41023	-5.01112	-5.81304	0.250689			-3.0707	2.34452	-5.41023	-5.01112	-5.81304	0.250689		0.813565		-1.47902	0.630631	0.645894
Q655X0	7.17572	2.66532	8.87489	9.4078	3.84157	6.42474	3	3	6			-2.05509	-5.98598	-0.317688	0.039951	-5.34543	-2.82947		-2.74895						-4.46244	-12.4513	-0.626202	0.0799507	-10.7841	-5.79916			-4.46244	-12.4513	-0.626202	0.0799507	-10.7841	-5.79916		0.896589		0.345555	0.0819271	0.944795
Q655X8	9.12008	7.95303	10.3976	5.78615	7.81782	8.77926	3	3	6			-0.11073	-0.698275	1.20499	-3.5817	-1.36919	-0.474943		-0.838307						-0.240441	-1.45246	2.37518	-7.16776	-2.76225	-0.973423			-0.240441	-1.45246	2.37518	-7.16776	-2.76225	-0.973423		0.547093		-3.8619	2.75405	0.148234
Q655Y0	8.2897	9.63704	8.6812	10.3297	9.95111	8.78656	3	3	6			-0.941116	0.985734	-0.511374	0.961836	0.764105	-0.467639		0.131924						-2.04355	2.0504	-1.00798	1.92485	1.54153	-0.958453			-2.04355	2.0504	-1.00798	1.92485	1.54153	-0.958453		0.702214		1.16968	1.04092	0.486018
Q657B3	10.6036	9.60901	8.31234	9.55522	8.64703	9.91228	3	3	6			1.37281	0.957705	-0.880239	0.187374	-0.539978	0.658073		0.292625						2.98094	1.9921	-1.73506	0.374976	-1.08937	1.34876			2.98094	1.9921	-1.73506	0.374976	-1.08937	1.34876		0.391662		-0.867874	0.697632	0.616583
Q657C0	8.93112	8.59574	10.5406	11.4341	9.89169	9.75005	3	3	6			-0.299691	-0.0555648	1.34804	2.06621	0.704688	0.495851		0.709921						-0.650753	-0.115579	2.65714	4.13493	1.42166	1.01628			-0.650753	-0.115579	2.65714	4.13493	1.42166	1.01628		0.953984		1.56069	1.58771	0.332698
Q657D6	10.9459	6.84172	6.95733	8.57463	8.37734	12.5782	3	3	6			1.71507	-1.80959	-2.23524	-0.793216	-0.809664	3.32398		-0.101443						3.72412	-3.76408	-4.40593	-1.5874	-1.63345	6.8127			3.72412	-3.76408	-4.40593	-1.5874	-1.63345	6.8127		0.926959		2.67925	0.934876	0.523088
Q657G7	8.95893	10.9648	8.57766	10.2435	11.2412	9.12122	3	3	6			-0.271883	2.31354	-0.614922	0.875683	2.0542	-0.13298		0.70394						-0.59037	4.81234	-1.21209	1.75243	4.14422	-0.27255			-0.59037	4.81234	-1.21209	1.75243	4.14422	-0.27255		0.616167		0.871409	0.465928	0.724005
Q657S5	10.4165	8.83023	11.1497	9.75622	10.3044	10.8652	3	3	6			1.18567	0.178923	1.95717	0.388375	1.11735	1.61099		1.07308						2.57457	0.372173	3.85782	0.777223	2.25417	3.30182			2.57457	0.372173	3.85782	0.777223	2.25417	3.30182		0.682169		-0.157116	0.141896	0.906328
Q657W3	8.43263	9.37006	8.50156	10.1244	12.2509	10.4085	3	3	6			-0.798187	0.718748	-0.691019	0.756532	3.06386	1.15434		0.700712						-1.73319	1.49505	-1.36208	1.51399	6.18113	2.36589			-1.73319	1.49505	-1.36208	1.51399	6.18113	2.36589		0.671219		3.88708	3.44485	0.0918327
Q657X6	12.405	9.75402	12.0276	12.4812	11.4882	10.9869	3	3	6			3.1742	1.10271	2.83505	3.11335	2.30124	1.73271		2.37654						6.89249	2.29372	5.58823	6.23049	4.6426	3.55129			6.89249	2.29372	5.58823	6.23049	4.6426	3.55129		0.488429		-0.116691	0.082437	0.944461
Q658H5	11.3108	10.8285	11.1251	11.8332	9.46164	10.474	3	3	6			2.07997	2.17715	1.93251	2.46536	0.274638	1.21981		1.69157						4.51647	4.52863	3.80922	4.93372	0.554065	2.50007			4.51647	4.52863	3.80922	4.93372	0.554065	2.50007		0.0680675		-1.62215	1.8537	0.276681
Q658I5	11.7535	9.43467	5.31132	12.3118	7.83674	11.2671	3	3	6			2.5227	0.783363	-3.88126	2.94396	-1.35026	2.01288		0.50523						5.47781	1.62945	-7.65042	5.8915	-2.72406	4.12551			5.47781	1.62945	-7.65042	5.8915	-2.72406	4.12551		0.625162		2.61204	0.717945	0.607963
Q65WW7	8.81526	9.62081	9.5435	6.45879	8.15548	3.38791	3	3	6			-0.415557	0.969499	0.350919	-2.90906	-1.03153	-5.86629		-1.48367						-0.902346	2.01663	0.691703	-5.82166	-2.08104	-12.0233			-0.902346	2.01663	0.691703	-5.82166	-2.08104	-12.0233		0.156191		-7.244	3.74789	0.0744343
Q65WY8	10.7933	11.0998	11.5391	9.96326	11.6221	12.5373	3	3	6			1.56247	2.4485	2.34653	0.595409	2.43514	3.28306		2.11185						3.39276	5.09307	4.6253	1.19154	4.91273	6.72884			3.39276	5.09307	4.6253	1.19154	4.91273	6.72884		0.176559		-0.0926693	0.05994	0.959304
Q65X23	10.5116	9.94726	11.0852	10.985	8.68734	7.61257	3	3	6			1.28074	1.29595	1.89263	1.61714	-0.499664	-1.64163		0.657528						2.78102	2.69567	3.7306	3.23625	-1.00804	-3.36462			2.78102	2.69567	3.7306	3.23625	-1.00804	-3.36462		0.0572944		-3.4479	2.70553	0.153304
Q65X70	11.1267	9.02489	11.6171	11.8124	9.45767	9.87748	3	3	6			1.89589	0.373583	2.42452	2.44453	0.270663	0.623281		1.33875						4.11676	0.777081	4.77903	4.89204	0.546046	1.27745			4.11676	0.777081	4.77903	4.89204	0.546046	1.27745		0.918792		-0.985778	0.693926	0.618169
Q65X71	10.5179	11.9626	6.9982	9.36234	10.7605	8.27076	3	3	6			1.28705	3.31134	-2.19438	-0.00550949	1.57347	-0.98344		0.498087						2.79472	6.88783	-4.32539	-0.0110257	3.17437	-2.01562			2.79472	6.88783	-4.32539	-0.0110257	3.17437	-2.01562		0.350861		-1.40315	0.479657	0.717148
Q65X92	10.9907	9.41739	8.81279	9.32629	10.7484	9.26437	3	3	6			1.75993	0.766081	-0.37979	-0.0415532	1.56136	0.0101698		0.612699						3.82153	1.59351	-0.748612	-0.0831571	3.14993	0.0208437			3.82153	1.59351	-0.748612	-0.0831571	3.14993	0.0208437		0.785215		-0.526269	0.374381	0.771436
Q65XF2	11.2216	9.06784	8.53831	8.25536	8.46369	10.4383	3	3	6			1.99083	0.416531	-0.654272	-1.11249	-0.723317	1.18407		0.18356						4.32292	0.866415	-1.28965	-2.22633	-1.45925	2.42682			4.32292	0.866415	-1.28965	-2.22633	-1.45925	2.42682		0.874118		-1.71948	1.07666	0.474124
Q65XG6	10.4232	9.4253	3.18653	7.69585	7.72281	8.29237	3	3	6			1.19241	0.773993	-6.00604	-1.67199	-1.4642	-0.961835		-1.35628						2.58921	1.60996	-11.8386	-3.34602	-2.95392	-1.97134			2.58921	1.60996	-11.8386	-3.34602	-2.95392	-1.97134		0.0153131		-0.210606	0.0467873	0.96809
Q65XK0	9.22144	8.60933	11.4803	9.74339	9.46632	8.80797	3	3	6			-0.00937046	-0.0419806	2.28771	0.375539	0.279316	-0.446236		0.407496						-0.0203471	-0.0873228	4.50935	0.751536	0.563503	-0.914587			-0.0203471	-0.0873228	4.50935	0.751536	0.563503	-0.914587		0.214203		-1.33374	1.13936	0.453961
Q65XK7	10.5235	9.3429	10.1434	8.05371	8.54786	10.7237	3	3	6			1.29265	0.69159	0.950806	-1.31414	-0.639146	1.46946		0.408537						2.80688	1.43856	1.87415	-2.62988	-1.28944	3.01174			2.80688	1.43856	1.87415	-2.62988	-1.28944	3.01174		0.106509		-2.34239	1.99137	0.251499
Q65XL5	11.4484	10.8338	12.181	10.548	11.3811	10.2376	3	3	6			2.21756	2.18245	2.98845	1.18011	2.19411	0.983366		1.95767						4.81524	4.53967	5.8906	2.36165	4.42647	2.01547			4.81524	4.53967	5.8906	2.36165	4.42647	2.01547		0.461363		-2.14731	3.90849	0.0665926
Q65XV2	6.17425	10.1117	10.0796	9.6067	12.4233	9.99972	3	3	6			-3.05657	1.46035	0.887041	0.238853	3.23629	0.745516		0.585248						-6.63706	3.03764	1.74846	0.477998	6.52902	1.52798			-6.63706	3.03764	1.74846	0.477998	6.52902	1.52798		0.549504		3.46198	1.37312	0.386056
Q65XV7	11.6554	6.54513	9.24384	10.3574	8.21091	8.88978	3	3	6			2.42454	-2.10617	0.0512632	0.989594	-0.97609	-0.364425		0.00311818						5.26467	-4.381	0.101046	1.98039	-1.9692	-0.74691			5.26467	-4.381	0.101046	1.98039	-1.9692	-0.74691		0.298578		-0.573478	0.219765	0.858706
Q65XV8	11.0614	7.25144	10.1566	11.1576	10.2999	11.5296	3	3	6			1.83063	-1.39987	0.964012	1.78975	1.11289	2.27537		1.09546						3.97504	-2.91184	1.90018	3.58169	2.24518	4.66352			3.97504	-2.91184	1.90018	3.58169	2.24518	4.66352		0.210406		2.509	1.69302	0.30928
Q66QH3	9.37532	9.91132	12.2535	9.26188	9.37552	9.35766	3	3	6			0.144509	1.26001	3.06089	-0.105965	0.188512	0.10346		0.775235						0.313789	2.62092	6.03338	-0.212058	0.380312	0.212047			0.313789	2.62092	6.03338	-0.212058	0.380312	0.212047		0.0222561		-2.86259	2.14552	0.226013
Q66V57	3.52632	7.66114	8.43091	9.04092	7.28983	8.80803	3	3	6			-5.70449	-0.99017	-0.761665	-0.326928	-1.89717	-0.446171		-1.68777						-12.3868	-2.05963	-1.50133	-0.654255	-3.82742	-0.914455			-12.3868	-2.05963	-1.50133	-0.654255	-3.82742	-0.914455		0.152591		3.51721	1.34523	0.393591
Q67IX6	9.13545	8.25734	9.85686	9.45076	11.9208	9.68377	3	3	6			-0.0953598	-0.393966	0.664284	0.0829098	2.73379	0.429564		0.570204						-0.207065	-0.81948	1.30938	0.165921	5.51525	0.880418			-0.207065	-0.81948	1.30938	0.165921	5.51525	0.880418		0.249306		2.09292	1.70019	0.307746
Q67J15	9.12949	8.44981	6.52111	9.6458	6.24426	6.39883	3	3	6			-0.101323	-0.201498	-2.67146	0.277955	-2.94275	-2.85537		-1.41574						-0.220015	-0.419131	-5.26578	0.556248	-5.9368	-5.85226			-0.220015	-0.419131	-5.26578	0.556248	-5.9368	-5.85226		0.740999		-1.77596	0.867562	0.548072
Q67J17	9.68804	7.6818	8.60118	11.1716	9.5114	9.82734	3	3	6			0.457228	-0.969506	-0.591401	1.8037	0.324392	0.57314		0.26626						0.99283	-2.01665	-1.16572	3.60961	0.65444	1.17469			0.99283	-2.01665	-1.16572	3.60961	0.65444	1.17469		0.983245		2.54276	3.09074	0.11738
Q67J19	8.95527	9.55974	7.71081	7.38948	6.07752	5.88024	3	3	6			-0.27554	0.908433	-1.48177	-1.97837	-3.10948	-3.37396		-1.55178						-0.598312	1.88961	-2.92075	-3.95915	-6.27318	-6.91513			-0.598312	1.88961	-2.92075	-3.95915	-6.27318	-6.91513		0.58929		-5.17267	4.82589	0.0352583
Q67TP9	9.69646	9.55474	10.3682	9.00829	8.40195	9.85554	3	3	6			0.465651	0.903435	1.1756	-0.359559	-0.785059	0.601336		0.333568						1.01112	1.87921	2.31725	-0.719557	-1.58381	1.23247			1.01112	1.87921	2.31725	-0.719557	-1.58381	1.23247		0.350252		-2.09283	3.5631	0.084606
Q67U26	12.4936	9.88766	12.7855	11.1362	10.5217	10.8701	3	3	6			3.26282	1.23636	3.59288	1.76837	1.33469	1.61585		2.13516						7.08492	2.57171	7.08199	3.5389	2.69266	3.31179			7.08492	2.57171	7.08199	3.5389	2.69266	3.31179		0.054991		-2.39842	2.38918	0.190891
Q67UC7	9.0276	11.0456	9.27826	9.93812	9.3343	9.9647	3	3	6			-0.203211	2.39432	0.0856864	0.570276	0.147291	0.710499		0.617476						-0.441254	4.98036	0.168898	1.14125	0.297149	1.45621			-0.441254	4.98036	0.168898	1.14125	0.297149	1.45621		0.0782666		-0.604465	0.420684	0.74707
Q67UE2	9.68904	9.16138	8.73152	9.27652	6.56068	11.8241	3	3	6			0.458224	0.510077	-0.461055	-0.0913279	-2.62632	2.56988		0.0599132						0.994994	1.061	-0.908794	-0.182767	-5.29843	5.26713			0.994994	1.061	-0.908794	-0.182767	-5.29843	5.26713		0.0858099		-0.453758	0.165956	0.891338
Q67UF5	11.1147	8.76967	12.8545	8.03078	12.2885	9.61031	3	3	6			1.88391	0.118365	3.66192	-1.33707	3.10152	0.356103		1.29746						4.09074	0.246209	7.21809	-2.67577	6.25711	0.729854			4.09074	0.246209	7.21809	-2.67577	6.25711	0.729854		0.750005		-2.41461	0.98856	0.50398
Q67UK9	5.19838	9.7375	11.8521	10.3199	9.9928	8.70936	3	3	6			-4.03244	1.08619	2.65952	0.95205	0.805792	-0.544843		0.15438						-8.75608	2.25937	5.24224	1.90526	1.62563	-1.11669			-8.75608	2.25937	5.24224	1.90526	1.62563	-1.11669		0.0975774		1.22289	0.334177	0.793237
Q67UQ7	9.5635	5.31716	10.6242	3.59503	3.71688	11.3194	3	3	6			0.332689	-3.33415	1.43167	-5.77282	-5.47012	2.06519		-1.79126						0.722404	-6.93528	2.82199	-11.5527	-11.0356	4.23273			0.722404	-6.93528	2.82199	-11.5527	-11.0356	4.23273		0.493906		-4.98823	1.15143	0.450178
Q67UR2	11.0677	5.90092	10.6287	8.47399	7.89579	8.16259	3	3	6			1.83689	-2.75039	1.43614	-0.893858	-1.29122	-1.09161		-0.459008						3.98865	-5.72102	2.83081	-1.78881	-2.60495	-2.23732			3.98865	-5.72102	2.83081	-1.78881	-2.60495	-2.23732		0.01181		-2.5765	1.03245	0.48888
Q67UU0	10.7539	8.48184	8.47476	10.9752	8.30424	11.7925	3	3	6			1.52307	-0.169467	-0.717817	1.60736	-0.882768	2.53834		0.649787						3.30722	-0.352505	-1.4149	3.21667	-1.78093	5.20249			3.30722	-0.352505	-1.4149	3.21667	-1.78093	5.20249		0.64311		1.69947	0.896017	0.537368
Q67UU9	10.0625	10.5451	10.7318	10.397	10.651	9.52009	3	3	6			0.831638	1.89375	1.53925	1.02918	1.46396	0.265886		1.17061						1.80583	3.93915	3.03405	2.05962	2.95344	0.544949			1.80583	3.93915	3.03405	2.05962	2.95344	0.544949		0.872237		-1.07367	1.66505	0.315334
Q67UX6	8.38961	6.9782	8.55493	9.74987	9.77563	6.79688	3	3	6			-0.841203	-1.67311	-0.637643	0.382022	0.588622	-2.45732		-0.773106						-1.8266	-3.4802	-1.25687	0.764509	1.18751	-5.03642			-1.8266	-3.4802	-1.25687	0.764509	1.18751	-5.03642		0.198641		1.15975	0.706678	0.612729
Q67V61	9.53273	8.47054	7.07371	8.83895	9.29269	9.12381	3	3	6			0.301913	-0.18077	-2.11886	-0.528896	0.105685	-0.130391		-0.425221						0.655578	-0.376016	-4.17654	-1.05844	0.213212	-0.267245			0.655578	-0.376016	-4.17654	-1.05844	0.213212	-0.267245		0.119711		0.928168	0.802634	0.573302
Q67V78	9.23546	9.59671	8.64929	10.9304	9.47847	8.71462	3	3	6			0.00465122	0.945404	-0.543285	1.56259	0.291461	-0.539579		0.286874						0.0100997	1.96651	-1.07088	3.12709	0.588004	-1.1059			0.0100997	1.96651	-1.07088	3.12709	0.588004	-1.1059		0.686111		0.567822	0.459423	0.727277
Q67VC8	11.0865	10.5984	9.51584	7.18289	8.92247	8.52881	3	3	6			1.85566	1.94712	0.323261	-2.18496	-0.26454	-0.725397		0.158523						4.02939	4.05015	0.637186	-4.37258	-0.533691	-1.48674			4.02939	4.05015	0.637186	-4.37258	-0.533691	-1.48674		0.982653		-5.03658	4.80467	0.0357809
Q67VD7	8.6681	9.78958	10.8043	9.93072	9.58931	12.6334	3	3	6			-0.562708	1.13828	1.61172	0.562875	0.402309	3.37918		1.08861						-1.22187	2.3677	3.17689	1.12644	0.811633	6.92583			-1.22187	2.3677	3.17689	1.12644	0.811633	6.92583		0.632452		1.51373	0.828673	0.563047
Q67VP4	11.7038	10.5861	10.0003	6.55095	8.33405	8.43725	3	3	6			2.473	1.93478	0.807705	-2.8169	-0.852955	-0.81695		0.121448						5.36991	4.02449	1.59208	-5.63724	-1.72078	-1.67439			5.36991	4.02449	1.59208	-5.63724	-1.72078	-1.67439		0.829458		-6.67296	5.81746	0.0177325
Q67VS5	11.2366	4.31462	8.90875	9.77312	9.28121	10.178	3	3	6			2.0058	-4.33668	-0.283824	0.405275	0.0942064	0.92384		-0.198564						4.35542	-9.02063	-0.559452	0.811044	0.190055	1.89347			4.35542	-9.02063	-0.559452	0.811044	0.190055	1.89347		0.0319489		2.70641	0.834052	0.560951
Q67VS7	6.06365	10.0015	7.1102	7.53465	9.16815	11.7338	3	3	6			-3.16716	1.35024	-2.08238	-1.83319	-0.0188594	2.47962		-0.545289						-6.87721	2.80861	-4.10463	-3.66862	-0.0380477	5.08213			-6.87721	2.80861	-4.10463	-3.66862	-0.0380477	5.08213		0.874383		3.18289	1.14036	0.453648
Q67VU7	10.2413	9.78072	9.47972	10.2207	9.57323	10.0293	3	3	6			1.01046	1.12941	0.287142	0.852893	0.386226	0.775085		0.740202						2.19412	2.34927	0.565992	1.70683	0.779185	1.58858			2.19412	2.34927	0.565992	1.70683	0.779185	1.58858		0.414277		-0.344926	0.69248	0.618789
Q67VW6	10.9154	13.1437	11.501	10.2313	9.42798	12.3928	3	3	6			1.68462	4.49236	2.30846	0.863493	0.240978	3.13857		2.12141						3.658	9.34446	4.55026	1.72804	0.486158	6.43269			3.658	9.34446	4.55026	1.72804	0.486158	6.43269		0.974634		-2.96861	1.71012	0.305635
Q67VZ8	11.0255	8.25446	7.77274	11.591	11.4272	6.22452	3	3	6			1.79467	-0.396845	-1.41983	2.22311	2.2402	-3.02968		0.235272						3.89697	-0.825468	-2.79866	4.44894	4.51947	-6.20951			3.89697	-0.825468	-2.79866	4.44894	4.51947	-6.20951		0.473913		0.828684	0.236179	0.848991
Q67W29	6.55172	5.03743	7.90791	8.15107	7.10203	8.76815	3	3	6			-2.6791	-3.61388	-1.28467	-1.21678	-2.08498	-0.486051		-1.89424						-5.81742	-7.51715	-2.53223	-2.43504	-4.20631	-0.996191			-5.81742	-7.51715	-2.53223	-2.43504	-4.20631	-0.996191		0.574075		2.74309	2.40682	0.188571
Q67W50	11.2409	8.03897	7.57622	10.8783	10.698	6.76951	3	3	6			2.01004	-0.612333	-1.61636	1.51043	1.51101	-2.4847		0.0530151						4.36462	-1.2737	-3.18604	3.02271	3.04836	-5.09253			4.36462	-1.2737	-3.18604	3.02271	3.04836	-5.09253		0.823361		0.357882	0.113762	0.924175
Q67W65	12.253	11.2248	11.8818	11.43	12.1655	12.5812	3	3	6			3.02224	2.57354	2.68919	2.06219	2.97853	3.32702		2.77545						6.56252	5.35316	5.30071	4.12689	6.00899	6.81893			6.56252	5.35316	5.30071	4.12689	6.00899	6.81893		0.421637		-0.0871933	0.108909	0.927289
Q67WJ2	9.89107	7.45656	8.40901	11.3516	12.1019	6.79403	3	3	6			0.660257	-1.19475	-0.783568	1.98375	2.91491	-2.46018		0.186737						1.43369	-2.48517	-1.54451	3.96993	5.88063	-5.04228			1.43369	-2.48517	-1.54451	3.96993	5.88063	-5.04228		0.219038		2.46809	0.923351	0.527283
Q67WM9	9.87181	7.93793	6.31596	6.92351	5.25822	7.22284	3	3	6			0.641	-0.713374	-2.87661	-2.44434	-3.92879	-2.03136		-1.89225						1.39188	-1.48387	-5.67015	-4.89166	-7.92608	-4.16339			1.39188	-1.48387	-5.67015	-4.89166	-7.92608	-4.16339		0.480015		-3.73966	2.41872	0.187022
Q67WN8	8.53722	10.4559	9.59574	9.46516	10.5841	9.2751	3	3	6			-0.693594	1.80464	0.403165	0.0973104	1.39711	0.0208978		0.504921						-1.50608	3.75378	0.794687	0.194739	2.81858	0.0428313			-1.50608	3.75378	0.794687	0.194739	2.81858	0.0428313		0.518831		0.00458813	0.0028091	0.998055
Q67WQ7	8.61673	8.23778	8.66042	8.50712	6.95268	6.92267	3	3	6			-0.61408	-0.413524	-0.532153	-0.860727	-2.23432	-2.33153		-1.16439						-1.33342	-0.86016	-1.04894	-1.7225	-4.5076	-4.77861			-1.33342	-0.86016	-1.04894	-1.7225	-4.5076	-4.77861		0.0388957		-2.58873	3.12029	0.115
Q67WR2	6.62328	9.82427	10.9436	8.77156	11.5716	9.14496	3	3	6			-2.60753	1.17297	1.75104	-0.596292	2.38461	-0.109238		0.332591						-5.66202	2.43986	3.4515	-1.19331	4.81079	-0.22389			-5.66202	2.43986	3.4515	-1.19331	4.81079	-0.22389		0.587926		1.05475	0.369684	0.773952
Q67WR5	10.5254	9.89028	10.1565	9.75051	11.2224	11.1984	3	3	6			1.29461	1.23897	0.963885	0.382658	2.03543	1.94424		1.30997						2.81113	2.57716	1.89993	0.765783	4.10634	3.98484			2.81113	2.57716	1.89993	0.765783	4.10634	3.98484		0.117452		0.522915	0.584455	0.666901
Q67X31	10.2147	10.789	10.1237	9.97097	8.25861	10.8673	3	3	6			0.983871	2.13774	0.931156	0.603121	-0.928392	1.61308		0.890095						2.13639	4.44666	1.83542	1.20698	-1.87297	3.3061			2.13639	4.44666	1.83542	1.20698	-1.87297	3.3061		0.462466		-1.92612	1.6245	0.324321
Q67X83	7.12391	8.25295	6.461	7.85393	6.99027	8.99435	3	3	6			-2.1069	-0.398358	-2.73157	-1.51391	-2.19673	-0.259849		-1.53455						-4.57494	-0.828615	-5.38426	-3.02967	-4.43176	-0.532576			-4.57494	-0.828615	-5.38426	-3.02967	-4.43176	-0.532576		0.795428		0.931268	0.658176	0.633679
Q67YI6	11.5352	9.38815	12.6242	10.8155	9.11694	11.8434	3	3	6			2.30437	0.736839	3.43167	1.4477	-0.0700633	2.58921		1.73995						5.00373	1.53268	6.76424	2.89716	-0.141348	5.30674			5.00373	1.53268	6.76424	2.89716	-0.141348	5.30674		0.974741		-1.74603	1.08284	0.472098
Q688R1	8.99342	9.60298	8.52619	8.66523	6.27184	10.1487	3	3	6			-0.237393	0.95167	-0.666391	-0.702619	-2.91517	0.894528		-0.445895						-0.515478	1.97955	-1.31354	-1.40609	-5.88116	1.83339			-0.515478	1.97955	-1.31354	-1.40609	-5.88116	1.83339		0.328684		-1.86813	1.03602	0.487672
Q688R3	7.96544	8.32161	9.09803	10.9382	9.10095	11.5598	3	3	6			-1.26537	-0.329695	-0.0945451	1.57033	-0.0860536	2.30556		0.350037						-2.74765	-0.68579	-0.18636	3.14258	-0.173608	4.72538			-2.74765	-0.68579	-0.18636	3.14258	-0.173608	4.72538		0.455525		3.77138	3.58555	0.0832996
Q688T8	9.63045	11.4687	9.68951	9.94078	8.53566	9.89289	3	3	6			0.399637	2.81737	0.496932	0.572936	-0.651341	0.638689		0.71237						0.867776	5.86034	0.979512	1.14657	-1.31404	1.30903			0.867776	5.86034	0.979512	1.14657	-1.31404	1.30903		0.419995		-2.18869	1.72409	0.30269
Q688X9	7.66853	8.68349	9.15368	10.0518	7.77689	9.49957	3	3	6			-1.56228	0.0321788	-0.0388985	0.683905	-1.41011	0.245365		-0.341641						-3.39236	0.0669344	-0.0766737	1.36864	-2.84481	0.502889			-3.39236	0.0669344	-0.0766737	1.36864	-2.84481	0.502889		0.872298		0.809607	0.597847	0.660739
Q688Y7	10.2636	8.72605	10.721	10.7842	8.3298	9.61303	3	3	6			1.03281	0.0747407	1.52844	1.41638	-0.857209	0.358832		0.592331						2.24265	0.155466	3.01273	2.83448	-1.72936	0.735448			2.24265	0.155466	3.01273	2.83448	-1.72936	0.735448		0.590382		-1.1901	1.02651	0.490896
Q689G6	9.89344	8.38206	9.90806	9.65912	9.81538	8.63107	3	3	6			0.662625	-0.269245	0.715485	0.291274	0.628378	-0.623134		0.234231						1.43883	-0.56005	1.41031	0.582903	1.26771	-1.27715			1.43883	-0.56005	1.41031	0.582903	1.26771	-1.27715		0.86182		-0.571875	0.735141	0.600759
Q689G9	9.92206	10.0737	10.0104	10.3235	10.3173	9.34771	3	3	6			0.691251	1.42243	0.817811	0.955657	1.13029	0.0935076		0.851826						1.50099	2.95877	1.612	1.91248	2.2803	0.191649			1.50099	2.95877	1.612	1.91248	2.2803	0.191649		0.692575		-0.562446	0.946484	0.518895
[truncated: 2,864 more rows]
